# Supplementary material for: Exposure-Dependent Control of Malaria-Induced Inflammation in Children
Source: PLOS journal article supplement (doi:10.1371/journal.ppat.1004079), 2014-04-17
Supplement: S5 (10.1371/journal.ppat.1004079.s005) [file journal.ppat.1004079.s005]

**Table S3.** Differentially expressed genes in response to *in vitro* *P. falciparum* stimulation from before to after malaria. Transcripts are significant if FDR-adjusted p-value < 0.05 and absolute fold change > 1.25. Transcript ID is the Affymetrix accession number.

| Transcript ID | Accession ID | Gene Symbol | Gene Description                                 | log <sup>2</sup> Fold Change | Fold Change | p-value  | FDR-adjusted p-value | Regulation relative to baseline | Figure 1D                           |
|---------------|--------------|-------------|--------------------------------------------------|------------------------------|-------------|----------|----------------------|---------------------------------|-------------------------------------|
| 8146934       | NM_015364    | LY96        | lymphocyte antigen 96                            | 0.599                        | 1.515       | 1.36E-03 | 1.36E-01             | Up                              | Anti-microbial                      |
| 8157524       | NR_024168    | TLR4        | toll-like receptor 4                             | 1.262                        | 2.398       | 2.02E-03 | 2.02E-01             | Up                              | Anti-microbial                      |
| 8166059       | NM_016562    | TLR7        | toll-like receptor 7                             | 0.613                        | 1.530       | 4.16E-03 | 4.16E-01             | Up                              | Anti-microbial                      |
| 8011826       | AY358809     | C17orf87    | chromosome 17 open reading frame                 | 1.138                        | 2.201       | 6.00E-05 | 6.00E-03             | Up                              | Antigen presentation/co-stimulation |
| 8063156       | NM_001250    | CD40        | CD40 molecule, TNF receptor superfamily          | 0.384                        | 1.305       | 2.35E-02 | 2.35E+00             | Up                              | Antigen presentation/co-stimulation |
| 8082035       | NM_175862    | CD86        | CD86 molecule                                    | 0.724                        | 1.652       | 2.11E-03 | 2.11E-01             | Up                              | Antigen presentation/co-stimulation |
| 8115147       | NM_00102515  | CD74        | CD74 molecule, major histocompatibility complex  | 0.435                        | 1.351       | 1.16E-03 | 1.16E-01             | Up                              | Antigen presentation/co-stimulation |
| 8118548       | NM_019111    | HLA-DRA     | major histocompatibility complex, class II, DRA  | 0.547                        | 1.461       | 1.43E-03 | 1.43E-01             | Up                              | Antigen presentation/co-stimulation |
| 8125530       | NM_002118    | HLA-DMB     | major histocompatibility complex, class II, DMB  | 0.719                        | 1.645       | 3.25E-04 | 3.25E-02             | Up                              | Antigen presentation/co-stimulation |
| 8125537       | NM_006120    | HLA-DMA     | major histocompatibility complex, class II, DMA  | 0.707                        | 1.632       | 1.45E-04 | 1.45E-02             | Up                              | Antigen presentation/co-stimulation |
| 8125556       | NM_033554    | HLA-DPA1    | major histocompatibility complex, class II, DPA1 | 0.630                        | 1.548       | 2.48E-03 | 2.48E-01             | Up                              | Antigen presentation/co-stimulation |
| 8178193       | NM_019111    | HLA-DRA     | major histocompatibility complex, class II, DRA  | 0.523                        | 1.437       | 2.41E-03 | 2.41E-01             | Up                              | Antigen presentation/co-stimulation |
| 8178884       | NM_006120    | HLA-DMA     | major histocompatibility complex, class II, DMA  | 0.728                        | 1.656       | 1.45E-04 | 1.45E-02             | Up                              | Antigen presentation/co-stimulation |
| 8178891       | NM_033554    | HLA-DPA1    | major histocompatibility complex, class II, DPA1 | 0.630                        | 1.548       | 2.48E-03 | 2.48E-01             | Up                              | Antigen presentation/co-stimulation |
| 8179481       | NM_019111    | HLA-DRA     | major histocompatibility complex, class II, DRA  | 0.540                        | 1.454       | 1.94E-03 | 1.94E-01             | Up                              | Antigen presentation/co-stimulation |
| 8180078       | NM_002118    | HLA-DMB     | major histocompatibility complex, class II, DMB  | 0.708                        | 1.633       | 3.48E-04 | 3.48E-02             | Up                              | Antigen presentation/co-stimulation |
| 8180086       | NM_006120    | HLA-DMA     | major histocompatibility complex, class II, DMA  | 0.728                        | 1.656       | 1.45E-04 | 1.45E-02             | Up                              | Antigen presentation/co-stimulation |
| 8180100       | NM_033554    | HLA-DPA1    | major histocompatibility complex, class II, DPA1 | 0.651                        | 1.570       | 1.03E-03 | 1.03E-01             | Up                              | Antigen presentation/co-stimulation |
| 7905047       | NM_000566    | FCGR1A      | Fc fragment of IgG, high affinity for IgG1       | 2.129                        | 4.374       | 2.86E-04 | 2.86E-02             | Up                              | Chemotaxis/Phagocytosis/killing     |
| 7905060       | NM_000566    | FCGR1A      | Fc fragment of IgG, high affinity for IgG1       | 1.775                        | 3.423       | 5.39E-04 | 5.39E-02             | Up                              | Chemotaxis/Phagocytosis/killing     |
| 7909371       | NM_000573    | CR1         | complement component (3b/4b) receptor            | 0.369                        | 1.292       | 2.11E-02 | 2.11E+00             | Up                              | Chemotaxis/Phagocytosis/killing     |
| 7919133       | NM_00101798  | FCGR1B      | Fc fragment of IgG, high affinity for IgG1       | 1.826                        | 3.547       | 3.15E-04 | 3.15E-02             | Up                              | Chemotaxis/Phagocytosis/killing     |
| 7919800       | NM_004079    | CTSS        | cathepsin S                                      | 0.651                        | 1.571       | 6.64E-03 | 6.64E-01             | Up                              | Chemotaxis/Phagocytosis/killing     |
| 7921868       | NM_000569    | FCGR3A      | Fc fragment of IgG, low affinity for IgG3        | 1.584                        | 2.998       | 1.29E-04 | 1.29E-02             | Up                              | Chemotaxis/Phagocytosis/killing     |
| 7921873       | NM_000569    | FCGR3A      | Fc fragment of IgG, low affinity for IgG3        | 1.552                        | 2.933       | 6.00E-05 | 6.00E-03             | Up                              | Chemotaxis/Phagocytosis/killing     |
| 7926410       | NM_002438    | MRC1        | mannose receptor, C type 1                       | 2.160                        | 4.468       | 1.06E-03 | 1.06E-01             | Up                              | Chemotaxis/Phagocytosis/killing     |
| 7926451       | NM_002438    | MRC1        | mannose receptor, C type 1                       | 2.160                        | 4.468       | 1.06E-03 | 1.06E-01             | Up                              | Chemotaxis/Phagocytosis/killing     |
| 7945666       | NM_001909    | CTSD        | cathepsin D                                      | 0.433                        | 1.350       | 2.56E-02 | 2.56E+00             | Up                              | Chemotaxis/Phagocytosis/killing     |
| 7950906       | NM_001814    | CTSC        | cathepsin C                                      | 0.836                        | 1.785       | 2.28E-03 | 2.28E-01             | Up                              | Chemotaxis/Phagocytosis/killing     |
| 7970287       | NM_005561    | LAMP1       | lysosomal-associated membrane protein 1          | 0.391                        | 1.312       | 1.16E-03 | 1.16E-01             | Up                              | Chemotaxis/Phagocytosis/killing     |
| 7980958       | NM_005606    | LGMN        | legumain                                         | 1.416                        | 2.668       | 6.17E-05 | 6.17E-03             | Up                              | Chemotaxis/Phagocytosis/killing     |
| 8026971       | NM_006332    | IFI30       | interferon, gamma-inducible protein 30           | 0.599                        | 1.515       | 2.04E-02 | 2.04E+00             | Up                              | Chemotaxis/Phagocytosis/killing     |
| 8072744       | NM_013416    | NCF4        | neutrophil cytosolic factor 4, 40kD              | 0.477                        | 1.392       | 1.89E-02 | 1.89E+00             | Up                              | Chemotaxis/Phagocytosis/killing     |
| 8079401       | NM_000579    | CCR5        | chemokine (C-C motif) receptor 5                 | 0.556                        | 1.470       | 1.56E-02 | 1.56E+00             | Up                              | Chemotaxis/Phagocytosis/killing     |
| 8086600       | NM_001295    | CCR1        | chemokine (C-C motif) receptor 1                 | 0.885                        | 1.847       | 2.34E-02 | 2.34E+00             | Up                              | Chemotaxis/Phagocytosis/killing     |
| 8093298       | NM_000579    | CCR5        | chemokine (C-C motif) receptor 5                 | 0.556                        | 1.470       | 1.56E-02 | 1.56E+00             | Up                              | Chemotaxis/Phagocytosis/killing     |
| 8133314       | NM_000265    | NCF1        | neutrophil cytosolic factor 1                    | 0.388                        | 1.309       | 1.87E-02 | 1.87E+00             | Up                              | Chemotaxis/Phagocytosis/killing     |
| 8133518       | NM_000265    | NCF1        | neutrophil cytosolic factor 1                    | 0.362                        | 1.285       | 2.11E-02 | 2.11E+00             | Up                              | Chemotaxis/Phagocytosis/killing     |
| 8133876       | NM_00100154  | CD36        | CD36 molecule (thrombospondin receptor)          | 2.304                        | 4.939       | 7.31E-05 | 7.31E-03             | Up                              | Chemotaxis/Phagocytosis/killing     |
| 8140227       | NM_000265    | NCF1        | neutrophil cytosolic factor 1                    | 0.390                        | 1.310       | 1.75E-02 | 1.75E+00             | Up                              | Chemotaxis/Phagocytosis/killing     |
| 8149330       | NM_147780    | CTSB        | cathepsin B                                      | 0.786                        | 1.724       | 1.78E-02 | 1.78E+00             | Up                              | Chemotaxis/Phagocytosis/killing     |
| 8166730       | NM_000397    | CYBB        | cytochrome b-245, beta polypeptide               | 1.132                        | 2.191       | 1.52E-03 | 1.52E-01             | Up                              | Chemotaxis/Phagocytosis/killing     |
| 8174779       | NM_013995    | LAMP2       | lysosomal-associated membrane protein 2          | 0.365                        | 1.288       | 3.02E-02 | 3.02E+00             | Up                              | Chemotaxis/Phagocytosis/killing     |
| 7909250       | NM_153758    | IL19        | interleukin 19                                   | -1.334                       | 0.397       | 5.48E-06 | 5.48E-04             | Down                            | Pro-inflammatory mediator           |
| 7909271       | NM_006850    | IL24        | interleukin 24                                   | -1.501                       | 0.353       | 1.76E-08 | 1.76E-06             | Down                            | Pro-inflammatory mediator           |
| 7996022       | NM_002990    | CCL22       | chemokine (C-C motif) ligand 22                  | -0.967                       | 0.512       | 1.94E-04 | 1.94E-02             | Down                            | Pro-inflammatory mediator           |
| 8014369       | NM_002983    | CCL3        | chemokine (C-C motif) ligand 3                   | -1.298                       | 0.407       | 6.17E-05 | 6.17E-03             | Down                            | Pro-inflammatory mediator           |
| 8014391       | NM_021006    | CCL3L1      | chemokine (C-C motif) ligand 3-like 1            | -1.314                       | 0.402       | 6.17E-05 | 6.17E-03             | Down                            | Pro-inflammatory mediator           |
| 8014414       | NM_021006    | CCL3L1      | chemokine (C-C motif) ligand 3-like 1            | -1.314                       | 0.402       | 6.17E-05 | 6.17E-03             | Down                            | Pro-inflammatory mediator           |
| 8019731       | NM_021006    | CCL3L1      | chemokine (C-C motif) ligand 3-like 1            | -1.314                       | 0.402       | 6.17E-05 | 6.17E-03             | Down                            | Pro-inflammatory mediator           |
| 8044541       | NM_019618    | IL1F9       | interleukin 1 family, member 9                   | -1.347                       | 0.393       | 3.98E-05 | 3.98E-03             | Down                            | Pro-inflammatory mediator           |
| 8048864       | NM_004591    | CCL20       | chemokine (C-C motif) ligand 20                  | -0.882                       | 0.543       | 9.41E-03 | 9.41E-01             | Down                            | Pro-inflammatory mediator           |
| 8054722       | NM_000576    | IL18        | interleukin 1, beta                              | -2.357                       | 0.195       | 2.70E-05 | 2.70E-03             | Down                            | Pro-inflammatory mediator           |
| 8095680       | NM_000584    | IL8         | interleukin 8                                    | -1.217                       | 0.430       | 7.31E-05 | 7.31E-03             | Down                            | Pro-inflammatory mediator           |
| 8095688       | NM_002993    | CXCL6       | chemokine (C-X-C motif) ligand 6                 | -0.466                       | 0.724       | 1.16E-02 | 1.16E+00             | Down                            | Pro-inflammatory mediator           |
| 8095697       | NM_001511    | CXCL1       | chemokine (C-X-C motif) ligand 1                 | -0.718                       | 0.608       | 1.58E-04 | 1.58E-02             | Down                            | Pro-inflammatory mediator           |
| 8100984       | NM_002090    | CXCL3       | chemokine (C-X-C motif) ligand 3                 | -0.931                       | 0.524       | 1.18E-03 | 1.18E-01             | Down                            | Pro-inflammatory mediator           |
| 8100994       | NM_002089    | CXCL2       | chemokine (C-X-C motif) ligand 2                 | -0.969                       | 0.511       | 1.20E-03 | 1.20E-01             | Down                            | Pro-inflammatory mediator           |
| 8129618       | NM_004666    | VNN1        | vanin 1                                          | -1.259                       | 0.418       | 2.72E-04 | 2.72E-02             | Down                            | Pro-inflammatory mediator           |
| 8131803       | NM_000600    | IL6         | interleukin 6 (interferon, beta 2)               | -3.101                       | 0.117       | 5.48E-06 | 5.48E-04             | Down                            | Pro-inflammatory mediator           |
| 7906377       | NM_002432    | MNDA        | myeloid cell nuclear differentiation antigen     | 1.880                        | 3.682       | 7.31E-05 | 7.31E-03             | Up                              | Regulator                           |
| 7942300       | NM_173042    | IL18BP      | interleukin 18 binding protein                   | 0.358                        | 1.282       | 2.93E-03 | 2.93E-01             | Up                              | Regulator                           |
| 7950473       | NM_004041    | ARRB1       | arrestin, beta 1                                 | 0.464                        | 1.379       | 1.27E-02 | 1.27E+00             | Up                              | Regulator                           |
| 7966089       | NM_00114234  | CMKLR1      | chemokine-like receptor 1                        | 1.448                        | 2.728       | 5.14E-04 | 5.14E-02             | Up                              | Regulator                           |
| 8043981       | NM_004633    | IL1R2       | interleukin 1 receptor, type II                  | 0.339                        | 1.265       | 6.79E-04 | 6.79E-02             | Up                              | Regulator                           |
| 8047692       | NM_005214    | CTLA4       | cytotoxic T-lymphocyte-associated antigen 4      | 0.368                        | 1.290       | 2.06E-02 | 2.06E+00             | Up                              | Regulator                           |
| 8066117       | NM_015474    | SAMHD1      | SAM domain and HD domain 1                       | 0.498                        | 1.412       | 8.11E-04 | 8.11E-02             | Up                              | Regulator                           |
| 8089519       | NM_181780    | BTLA        | B and T lymphocyte associated                    | 0.372                        | 1.294       | 7.79E-03 | 7.79E-01             | Up                              | Regulator                           |
| 8092169       | NM_003810    | TNFSF10     | tumor necrosis factor (ligand) superfamily 10    | 0.568                        | 1.483       | 1.87E-02 | 1.87E+00             | Up                              | Regulator                           |
| 8096301       | NM_00104005  | SPP1        | secreted phosphoprotein 1                        | 1.618                        | 3.068       | 1.88E-02 | 1.88E+00             | Up                              | Regulator                           |
| 8100231       | NM_003215    | TEC         | tec protein tyrosine kinase                      | 0.385                        | 1.306       | 2.12E-02 | 2.12E+00             | Up                              | Regulator                           |

|         |              |          |                                     |        |       |          |          |      |           |
|---------|--------------|----------|-------------------------------------|--------|-------|----------|----------|------|-----------|
| 8112428 | NM_005582    | CD180    | CD180 molecule                      | 0.973  | 1.963 | 6.17E-05 | 6.17E-03 | Up   | Regulator |
| 8118158 | NM_004847    | AIF1     | allograft inflammatory factor 1     | 1.211  | 2.316 | 2.39E-04 | 2.39E-02 | Up   | Regulator |
| 8154178 | NM_004972    | JAK2     | Janus kinase 2                      | 0.673  | 1.594 | 1.38E-03 | 1.38E-01 | Up   | Regulator |
| 8156321 | NM_003177    | SYK      | spleen tyrosine kinase              | 0.458  | 1.373 | 3.64E-03 | 3.64E-01 | Up   | Regulator |
| 8177996 | NM_004847    | AIF1     | allograft inflammatory factor 1     | 1.211  | 2.316 | 2.39E-04 | 2.39E-02 | Up   | Regulator |
| 8179276 | NM_004847    | AIF1     | allograft inflammatory factor 1     | 1.211  | 2.316 | 2.39E-04 | 2.39E-02 | Up   | Regulator |
| 7922976 | NM_000963    | PTGS2    | prostaglandin-endoperoxide synth    | -2.726 | 0.151 | 2.95E-05 | 2.95E-03 | Down | Regulator |
| 7924450 | NM_007207    | DUSP10   | dual specificity phosphatase 10     | -0.348 | 0.786 | 2.46E-02 | 2.46E+00 | Down | Regulator |
| 7968344 | NM_001629    | ALOX5AP  | arachidonate 5-lipoxygenase-activ   | -0.426 | 0.744 | 1.72E-02 | 1.72E+00 | Down | Regulator |
| 7978644 | NM_020529    | NFKBIA   | nuclear factor of kappa light polyp | -0.377 | 0.770 | 2.93E-03 | 2.93E-01 | Down | Regulator |
| 8096635 | NM_003998    | NFKB1    | nuclear factor of kappa light polyp | -0.329 | 0.796 | 1.59E-02 | 1.59E+00 | Down | Regulator |
| 8115210 | NM_006058    | TNIP1    | TNFAIP3 interacting protein 1       | -0.366 | 0.776 | 2.35E-03 | 2.35E-01 | Down | Regulator |
| 8122265 | NM_006290    | TNFAIP3  | tumor necrosis factor, alpha-induc  | -0.354 | 0.783 | 1.90E-02 | 1.90E+00 | Down | Regulator |
| 8126303 | NM_018643    | TREM1    | triggering receptor expressed on m  | -1.418 | 0.374 | 1.00E-03 | 1.00E-01 | Down | Regulator |
| 7963770 | NM_020370    | GPR84    | G protein-coupled receptor 84       | -0.424 | 0.745 | 6.71E-02 | 6.71E+00 |      |           |
| 7994131 | NM_002738    | PRKCB    | protein kinase C, beta              | 0.306  | 1.237 | 9.18E-04 | 9.18E-02 |      |           |
| 8116559 | NM_002460    | IRF4     | interferon regulatory factor 4      | -0.303 | 0.810 | 6.30E-02 | 6.30E+00 |      |           |
| 8150076 | NM_001394    | DUSP4    | dual specificity phosphatase 4      | -0.316 | 0.803 | 6.08E-02 | 6.08E+00 |      |           |
| 8100977 | NM_002994    | CXCL5    | chemokine (C-X-C motif) ligand 5    | -0.966 | 0.512 | 5.58E-02 | 5.58E+00 |      |           |
| 8160879 | NM_006274    | CCL19    | chemokine (C-C motif) ligand 19     | -0.578 | 0.670 | 5.55E-02 | 5.55E+00 |      |           |
| 7911178 | NM_004895    | NLRP3    | NLR family, pyrin domain containi   | -0.339 | 0.791 | 6.13E-02 | 6.13E+00 |      |           |
| 7893228 | ---          | ---      | ---                                 | 0.486  | 1.400 | 1.96E-02 | 1.96E+00 | Up   |           |
| 7895116 | ---          | ---      | ---                                 | 0.405  | 1.324 | 1.11E-02 | 1.11E+00 | Up   |           |
| 7895482 | ---          | ---      | ---                                 | 0.515  | 1.429 | 2.02E-02 | 2.02E+00 | Up   |           |
| 7895909 | ---          | ---      | ---                                 | 0.404  | 1.323 | 4.10E-02 | 4.10E+00 | Up   |           |
| 7896689 | ---          | ---      | ---                                 | 0.487  | 1.401 | 3.17E-03 | 3.17E-01 | Up   |           |
| 7896690 | ---          | ---      | ---                                 | 0.486  | 1.400 | 1.57E-02 | 1.57E+00 | Up   |           |
| 7896697 | ---          | ---      | ---                                 | 0.450  | 1.366 | 3.35E-02 | 3.35E+00 | Up   |           |
| 7896700 | ---          | ---      | ---                                 | 0.751  | 1.683 | 2.93E-03 | 2.93E-01 | Up   |           |
| 7896705 | ---          | ---      | ---                                 | 0.585  | 1.501 | 8.87E-03 | 8.87E-01 | Up   |           |
| 7896706 | ---          | ---      | ---                                 | 1.847  | 3.597 | 7.60E-05 | 7.60E-03 | Up   |           |
| 7896707 | ---          | ---      | ---                                 | 0.537  | 1.451 | 8.53E-03 | 8.53E-01 | Up   |           |
| 7896714 | ---          | ---      | ---                                 | 0.669  | 1.590 | 3.28E-02 | 3.28E+00 | Up   |           |
| 7896718 | ---          | ---      | ---                                 | 0.719  | 1.646 | 5.22E-03 | 5.22E-01 | Up   |           |
| 7896729 | ---          | ---      | ---                                 | 0.477  | 1.392 | 3.55E-02 | 3.55E+00 | Up   |           |
| 7898124 | NM_052929    | FHAD1    | forkhead-associated (FHA) phosph    | 0.372  | 1.294 | 2.02E-03 | 2.02E-01 | Up   |           |
| 7898799 | NM_00111410  | C1QC     | complement component 1, q subc      | 0.553  | 1.467 | 9.34E-04 | 9.34E-02 | Up   |           |
| 7898805 | NM_000491    | C1QB     | complement component 1, q subc      | 0.481  | 1.396 | 3.68E-03 | 3.68E-01 | Up   |           |
| 7901110 | NM_006066    | AKR1A1   | aldo-keto reductase family 1, men   | 0.500  | 1.414 | 6.74E-04 | 6.74E-02 | Up   |           |
| 7903980 | BC017973     | C1orf162 | chromosome 1 open reading fram      | 0.827  | 1.774 | 3.40E-04 | 3.40E-02 | Up   |           |
| 7904726 | NM_006472    | TXNIP    | thioredoxin interacting protein     | 0.374  | 1.296 | 3.72E-03 | 3.72E-01 | Up   |           |
| 7905147 | BC017761     | C1orf54  | chromosome 1 open reading fram      | 0.809  | 1.752 | 3.06E-03 | 3.06E-01 | Up   |           |
| 7906486 | NM_020125    | SLAMF8   | SLAM family member 8                | 0.786  | 1.725 | 3.72E-03 | 3.72E-01 | Up   |           |
| 7906564 | NM_003768    | PEA15    | phosphoprotein enriched in astro    | 0.369  | 1.291 | 1.19E-02 | 1.19E+00 | Up   |           |
| 7907657 | NM_152663    | RALGPS2  | Ral GEF with PH domain and SH3 d    | 0.356  | 1.280 | 6.84E-03 | 6.84E-01 | Up   |           |
| 7908003 | NM_030769    | NPL      | N-acetylneuraminate pyruvate lya    | 0.888  | 1.851 | 3.72E-02 | 3.72E+00 | Up   |           |
| 7908125 | NM_015149    | RLG1     | ral guanine nucleotide dissociatio  | 1.053  | 2.076 | 2.42E-03 | 2.42E-01 | Up   |           |
| 7909446 | NM_005525    | HSD11B1  | hydroxysteroid (11-beta) dehydro    | 1.112  | 2.161 | 2.39E-04 | 2.39E-02 | Up   |           |
| 7913694 | NM_000147    | FUCA1    | fucosidase, alpha-L-1, tissue       | 1.596  | 3.024 | 1.94E-04 | 1.94E-02 | Up   |           |
| 7918474 | NM_178454    | DRAM2    | DNA-damage regulated autophagy      | 0.338  | 1.264 | 1.24E-03 | 1.24E-01 | Up   |           |
| 7920271 | NM_019554    | S100A4   | S100 calcium binding protein A4     | 0.499  | 1.413 | 2.93E-02 | 2.93E+00 | Up   |           |
| 7921298 | NM_030764    | FCRL2    | Fc receptor-like 2                  | 0.555  | 1.469 | 2.41E-03 | 2.41E-01 | Up   |           |
| 7921319 | NM_052938    | FCRL1    | Fc receptor-like 1                  | 0.451  | 1.367 | 1.52E-03 | 1.52E-01 | Up   |           |
| 7921637 | NM_003874    | CD84     | CD84 molecule                       | 0.907  | 1.875 | 2.34E-05 | 2.34E-03 | Up   |           |
| 7921882 | NM_015441    | OLFML2B  | olfactomedin-like 2B                | 0.691  | 1.615 | 1.80E-02 | 1.80E+00 | Up   |           |
| 7922689 | NM_002065    | GLUL     | glutamate-ammonia ligase (glutan    | 0.736  | 1.666 | 1.68E-03 | 1.68E-01 | Up   |           |
| 7926545 | NM_032812    | PLXDC2   | plexin domain containing 2          | 1.008  | 2.011 | 7.35E-03 | 7.35E-01 | Up   |           |
| 7927215 | NM_000698    | ALOX5    | arachidonate 5-lipoxygenase         | 0.382  | 1.303 | 1.89E-02 | 1.89E+00 | Up   |           |
| 7932023 | NM_014688    | USP6NL   | USP6 N-terminal like                | 0.603  | 1.519 | 5.92E-04 | 5.92E-02 | Up   |           |
| 7933872 | NM_000399    | EGR2     | early growth response 2             | 0.799  | 1.740 | 8.69E-03 | 8.69E-01 | Up   |           |
| 7934196 | NM_002778    | PSAP     | prosaposin                          | 0.518  | 1.432 | 3.64E-02 | 3.64E+00 | Up   |           |
| 7934920 | NM_00112760  | LIPA     | lipase A, lysosomal acid, cholester | 1.278  | 2.425 | 5.48E-06 | 5.48E-04 | Up   |           |
| 7935058 | NM_013451    | MYOF     | myoferlin                           | 1.670  | 3.182 | 3.51E-04 | 3.51E-02 | Up   |           |
| 7935270 | NM_013314    | BLNK     | B-cell linker                       | 0.475  | 1.390 | 1.61E-02 | 1.61E+00 | Up   |           |
| 7937802 | NM_004356    | CD81     | CD81 molecule                       | 0.344  | 1.270 | 5.39E-03 | 5.39E-01 | Up   |           |
| 7940028 | NM_000062    | SERPING1 | serpin peptidase inhibitor, clade G | 0.881  | 1.842 | 4.21E-02 | 4.21E+00 | Up   |           |
| 7942830 | ENST00000391 | GCRG224  | GCRG-P224                           | 0.425  | 1.343 | 1.13E-02 | 1.13E+00 | Up   |           |
| 7944722 | NM_032873    | UBASH3B  | ubiquitin associated and SH3 dom    | 0.474  | 1.389 | 3.48E-04 | 3.48E-02 | Up   |           |
| 7945371 | NM_021034    | IFITM3   | interferon induced transmembran     | 0.766  | 1.701 | 2.08E-02 | 2.08E+00 | Up   |           |
| 7948364 | NM_00103939  | MPEG1    | macrophage expressed 1              | 1.174  | 2.256 | 4.30E-05 | 4.30E-03 | Up   |           |
| 7948455 | NM_152852    | MS4A6A   | membrane-spanning 4-domains, s      | 1.059  | 2.084 | 1.12E-02 | 1.12E+00 | Up   |           |
| 7950578 | NM_00112862  | PAK1     | p21 protein (Cdc42/Rac)-activated   | 0.605  | 1.521 | 3.49E-03 | 3.49E-01 | Up   |           |
| 7951004 | NM_020179    | C11orf75 | chromosome 11 open reading fra      | 0.488  | 1.403 | 4.10E-03 | 4.10E-01 | Up   |           |
| 7952319 | ---          | ---      | ---                                 | 0.465  | 1.380 | 1.83E-03 | 1.83E-01 | Up   |           |
| 7953291 | NM_001769    | CD9      | CD9 molecule                        | 0.636  | 1.554 | 2.53E-03 | 2.53E-01 | Up   |           |
| 7953901 | NM_138337    | CLEC12A  | C-type lectin domain family 12, m   | 1.085  | 2.122 | 1.35E-02 | 1.35E+00 | Up   |           |
| 7958207 | ---          | ---      | ---                                 | 0.327  | 1.254 | 1.26E-02 | 1.26E+00 | Up   |           |

|         |               |                |                                        |       |       |          |          |    |  |
|---------|---------------|----------------|----------------------------------------|-------|-------|----------|----------|----|--|
| 7959251 | NM_002562     | P2RX7          | purinergic receptor P2X, ligand-ga     | 0.857 | 1.812 | 3.29E-02 | 3.29E+00 | Up |  |
| 7960771 | NM_174941     | CD163L1        | CD163 molecule-like 1                  | 0.430 | 1.347 | 2.82E-03 | 2.82E-01 | Up |  |
| 7960794 | NM_004244     | CD163          | CD163 molecule                         | 1.640 | 3.116 | 9.67E-03 | 9.67E-01 | Up |  |
| 7961059 | NM_002258     | KLRB1          | killer cell lectin-like receptor subfa | 0.501 | 1.415 | 4.06E-02 | 4.06E+00 | Up |  |
| 7961440 | NM_024829     | PLBD1          | phospholipase B domain containin       | 0.842 | 1.792 | 4.44E-04 | 4.44E-02 | Up |  |
| 7961891 | NM_030762     | BHLHE41        | basic helix-loop-helix family, mem     | 0.643 | 1.562 | 1.27E-03 | 1.27E-01 | Up |  |
| 7964834 | NM_001874     | CPM            | carboxypeptidase M                     | 0.754 | 1.686 | 6.41E-03 | 6.41E-01 | Up |  |
| 7965627 | NM_000895     | LTA4H          | leukotriene A4 hydrolase               | 0.642 | 1.560 | 4.33E-03 | 4.33E-01 | Up |  |
| 7971573 | NM_001268     | RCBTB2         | regulator of chromosome condens        | 0.897 | 1.862 | 9.18E-04 | 9.18E-02 | Up |  |
| 7974461 | NR_003225     | LGALS3         | lectin, galactoside-binding, soluble   | 0.485 | 1.400 | 3.68E-03 | 3.68E-01 | Up |  |
| 7974816 | NM_153811     | SLC38A6        | solute carrier family 38, member 6     | 0.551 | 1.465 | 2.46E-02 | 2.46E+00 | Up |  |
| 7975799 | NM_017791     | FLVCR2         | feline leukemia virus subgroup C c     | 0.586 | 1.501 | 1.94E-03 | 1.94E-01 | Up |  |
| 7975813 | ---           | ---            | ---                                    | 0.446 | 1.363 | 2.59E-02 | 2.59E+00 | Up |  |
| 7977933 | NM_012244     | SLC7A8         | solute carrier family 7 (cationic an   | 0.750 | 1.682 | 2.41E-03 | 2.41E-01 | Up |  |
| 7979455 | NM_021136     | RTN1           | reticulon 1                            | 0.398 | 1.317 | 2.66E-02 | 2.66E+00 | Up |  |
| 7980146 | NM_006432     | NPC2           | Niemann-Pick disease, type C2          | 0.599 | 1.515 | 3.64E-02 | 3.64E+00 | Up |  |
| 7981183 | NM_021966     | TCL1A          | T-cell leukemia/lymphoma 1A            | 0.522 | 1.436 | 2.73E-02 | 2.73E+00 | Up |  |
| 7981718 | BC020240 // B | IGHM // IGHM   | immunoglobulin heavy constant m        | 0.814 | 1.758 | 7.31E-05 | 7.31E-03 | Up |  |
| 7981720 | ---           | ---            | ---                                    | 0.378 | 1.300 | 3.15E-04 | 3.15E-02 | Up |  |
| 7981722 | AK128476      | IGHA1          | immunoglobulin heavy constant a        | 0.555 | 1.469 | 9.49E-05 | 9.49E-03 | Up |  |
| 7981724 | BC021276      | IGHD           | immunoglobulin heavy constant d        | 0.815 | 1.759 | 2.16E-04 | 2.16E-02 | Up |  |
| 7981728 | ENST00000390  | LOC100293211   | similar to hCG2042717                  | 0.794 | 1.734 | 1.20E-04 | 1.20E-02 | Up |  |
| 7981730 | AB001736      | IGLJ3          | immunoglobulin lambda joining 3        | 0.719 | 1.646 | 6.05E-05 | 6.05E-03 | Up |  |
| 7981732 | ENST00000338  | VSIG6          | V-set and immunoglobulin domain        | 0.707 | 1.633 | 3.15E-04 | 3.15E-02 | Up |  |
| 7981737 | AF067420 // A | IGHA1 // IGHAI | immunoglobulin heavy constant a        | 0.350 | 1.274 | 5.88E-03 | 5.88E-01 | Up |  |
| 7981740 | BC073771 // B | IGHA1 // IGHAI | immunoglobulin heavy constant a        | 0.568 | 1.482 | 3.40E-04 | 3.40E-02 | Up |  |
| 7982564 | NM_152594     | SPRED1         | sprouty-related, EVH1 domain con       | 0.969 | 1.957 | 1.58E-02 | 1.58E+00 | Up |  |
| 7985809 | NM_007011     | ABHD2          | abhydrolase domain containing 2        | 0.334 | 1.261 | 1.44E-02 | 1.44E+00 | Up |  |
| 7989277 | NM_004998     | MYO1E          | myosin IE                              | 0.529 | 1.443 | 3.68E-03 | 3.68E-01 | Up |  |
| 7989309 | ---           | ---            | ---                                    | 0.516 | 1.430 | 6.02E-03 | 6.02E-01 | Up |  |
| 7995096 | NM_00114580   | ITGAM          | integrin, alpha M (complement co       | 0.571 | 1.486 | 3.00E-03 | 3.00E-01 | Up |  |
| 7995263 | AF067420      | IGHA1          | immunoglobulin heavy constant a        | 0.429 | 1.346 | 2.68E-04 | 2.68E-02 | Up |  |
| 7995697 | NM_017839     | LPCAT2         | lysophosphatidylcholine acyltrans      | 1.425 | 2.685 | 2.16E-04 | 2.16E-02 | Up |  |
| 7997712 | NM_002163     | IRF8           | interferon regulatory factor 8         | 0.402 | 1.321 | 1.26E-03 | 1.26E-01 | Up |  |
| 8000375 | NM_00100663   | ARHGAP17       | Rho GTPase activating protein 17       | 0.343 | 1.268 | 9.40E-05 | 9.40E-03 | Up |  |
| 8001104 | ENST00000390  | LOC100290146   | hypothetical protein LOC1002901        | 0.423 | 1.341 | 7.43E-05 | 7.43E-03 | Up |  |
| 8002667 | NM_031293     | PMFBP1         | polyamine modulated factor 1 bin       | 0.522 | 1.436 | 1.15E-03 | 1.15E-01 | Up |  |
| 8004938 | ENST00000420  | LOC100129677   | hypothetical protein LOC1001296        | 0.627 | 1.545 | 1.45E-04 | 1.45E-02 | Up |  |
| 8005458 | NM_00104007   | LGALS9C        | lectin, galactoside-binding, soluble   | 0.689 | 1.612 | 1.26E-04 | 1.26E-02 | Up |  |
| 8006214 | NM_018404     | ADAP2          | ArfGAP with dual PH domains 2          | 0.633 | 1.551 | 1.24E-02 | 1.24E+00 | Up |  |
| 8006440 | NM_006273     | CCL7           | chemokine (C-C motif) ligand 7         | 1.362 | 2.571 | 9.05E-03 | 9.05E-01 | Up |  |
| 8006459 | NM_005408     | CCL13          | chemokine (C-C motif) ligand 13        | 1.080 | 2.114 | 8.12E-04 | 8.12E-02 | Up |  |
| 8007228 | NM_00113002   | ATP6V0A1       | ATPase, H+ transporting, lysosoma      | 0.801 | 1.742 | 2.59E-03 | 2.59E-01 | Up |  |
| 8007483 | NM_145041     | TMEM106A       | transmembrane protein 106A             | 0.399 | 1.318 | 1.11E-02 | 1.11E+00 | Up |  |
| 8008646 | NM_021626     | SCPEP1         | serine carboxypeptidase 1              | 0.887 | 1.849 | 1.26E-03 | 1.26E-01 | Up |  |
| 8013450 | NM_00104268   | LGALS9B        | lectin, galactoside-binding, soluble   | 0.745 | 1.676 | 1.30E-04 | 1.30E-02 | Up |  |
| 8017210 | NM_003916     | AP1S2          | adaptor-related protein complex 1      | 0.375 | 1.296 | 3.63E-02 | 3.63E+00 | Up |  |
| 8017599 | NM_000442     | PECAM1         | platelet/endothelial cell adhesion     | 0.760 | 1.694 | 1.66E-03 | 1.66E-01 | Up |  |
| 8019622 | NM_145041     | TMEM106A       | transmembrane protein 106A             | 0.369 | 1.292 | 2.26E-02 | 2.26E+00 | Up |  |
| 8020668 | NM_018439     | IMPACT         | Impact homolog (mouse)                 | 0.362 | 1.286 | 9.34E-04 | 9.34E-02 | Up |  |
| 8021301 | NM_004163     | RAB27B         | RAB27B, member RAS oncogene fa         | 0.324 | 1.252 | 1.56E-02 | 1.56E+00 | Up |  |
| 8021727 | NM_018235     | CNDP2          | CNDP dipeptidase 2 (metallopepti       | 0.351 | 1.275 | 1.90E-02 | 1.90E+00 | Up |  |
| 8022572 | NM_080597     | OSBPL1A        | oxysterol binding protein-like 1A      | 0.628 | 1.545 | 2.40E-03 | 2.40E-01 | Up |  |
| 8026106 | NM_004343     | CALR           | calreticulin                           | 0.337 | 1.263 | 4.48E-03 | 4.48E-01 | Up |  |
| 8030866 | NM_002030     | FPR3           | formyl peptide receptor 3              | 2.126 | 4.364 | 1.45E-04 | 1.45E-02 | Up |  |
| 8031238 | NM_006847     | LILRB4         | leukocyte immunoglobulin-like rec      | 0.428 | 1.346 | 3.99E-02 | 3.99E+00 | Up |  |
| 8033332 | NR_024075     | EMR4P          | egf-like module containing, mucin      | 0.334 | 1.260 | 3.41E-02 | 3.41E+00 | Up |  |
| 8036224 | NM_003332     | TYROBP         | TYRO protein tyrosine kinase bind      | 0.462 | 1.378 | 3.53E-02 | 3.53E+00 | Up |  |
| 8039212 | NM_005874     | LILRB2         | leukocyte immunoglobulin-like rec      | 0.529 | 1.443 | 1.44E-02 | 1.44E+00 | Up |  |
| 8042391 | NM_002664     | PLEK           | pleckstrin                             | 0.630 | 1.547 | 3.07E-02 | 3.07E+00 | Up |  |
| 8042468 | NM_001153     | ANXA4          | annexin A4                             | 0.768 | 1.703 | 1.26E-03 | 1.26E-01 | Up |  |
| 8042576 | NM_017567     | NAGK           | N-acetylglucosamine kinase             | 0.503 | 1.417 | 6.90E-03 | 6.90E-01 | Up |  |
| 8042830 | NR_027405     | MTHFD2         | methylenetetrahydrofolate dehyd        | 0.382 | 1.303 | 7.02E-03 | 7.02E-01 | Up |  |
| 8043197 | NM_003761     | VAMP8          | vesicle-associated membrane prot       | 0.426 | 1.343 | 1.25E-02 | 1.25E+00 | Up |  |
| 8043203 | NM_006634     | VAMP5          | vesicle-associated membrane prot       | 0.692 | 1.616 | 5.06E-03 | 5.06E-01 | Up |  |
| 8043360 | BC030813      | IGK@           | immunoglobulin kappa locus             | 0.438 | 1.355 | 9.74E-04 | 9.74E-02 | Up |  |
| 8043431 | AF113887 // A | IGKC // IGKC   | immunoglobulin kappa constant /        | 0.561 | 1.475 | 3.35E-03 | 3.35E-01 | Up |  |
| 8043436 | BC073772 // B | IGKC // IGKC   | immunoglobulin kappa constant /        | 0.548 | 1.462 | 1.07E-02 | 1.07E+00 | Up |  |
| 8043449 | BC030813      | IGK@           | immunoglobulin kappa locus             | 0.468 | 1.383 | 1.32E-03 | 1.32E-01 | Up |  |
| 8043459 | ENST00000390  | IGKC           | immunoglobulin kappa constant          | 0.385 | 1.306 | 2.40E-03 | 2.40E-01 | Up |  |
| 8043465 | BC029444 // B | IGKC // IGKC   | immunoglobulin kappa constant /        | 0.376 | 1.297 | 7.68E-04 | 7.68E-02 | Up |  |
| 8043468 | ---           | ---            | ---                                    | 0.629 | 1.547 | 2.17E-03 | 2.17E-01 | Up |  |
| 8043470 | ---           | ---            | ---                                    | 0.512 | 1.426 | 3.86E-03 | 3.86E-01 | Up |  |
| 8043476 | ENST00000390  | IGKC           | immunoglobulin kappa constant          | 0.543 | 1.457 | 9.29E-03 | 9.29E-01 | Up |  |
| 8043480 | ---           | ---            | ---                                    | 0.372 | 1.294 | 2.86E-03 | 2.86E-01 | Up |  |
| 8044391 | NM_006343     | MERTK          | c-mer proto-oncogene tyrosine kin      | 1.022 | 2.031 | 1.75E-02 | 1.75E+00 | Up |  |
| 8046333 | NM_024843     | CYBRD1         | cytochrome b reductase 1               | 0.445 | 1.361 | 1.07E-02 | 1.07E+00 | Up |  |

|         |             |          |                                       |       |       |          |          |    |  |
|---------|-------------|----------|---------------------------------------|-------|-------|----------|----------|----|--|
| 8050278 | NM_005742   | PDIA6    | protein disulfide isomerase family    | 0.338 | 1.264 | 5.68E-03 | 5.68E-01 | Up |  |
| 8051762 | NM_021097   | SLC8A1   | solute carrier family 8 (sodium/cal   | 1.502 | 2.832 | 2.37E-04 | 2.37E-02 | Up |  |
| 8053484 | NM_003896   | ST3GAL5  | ST3 beta-galactoside alpha-2,3-sia    | 0.533 | 1.447 | 9.34E-04 | 9.34E-02 | Up |  |
| 8053690 | BC032451    | IGK@     | immunoglobulin kappa locus            | 0.609 | 1.525 | 6.17E-05 | 6.17E-03 | Up |  |
| 8055639 | ---         | ---      | ---                                   | 0.471 | 1.386 | 2.41E-02 | 2.41E+00 | Up |  |
| 8056343 | NM_014900   | COBL1    | COBL-like 1                           | 0.402 | 1.321 | 1.86E-02 | 1.86E+00 | Up |  |
| 8058498 | NM_003468   | FZD5     | frizzled homolog 5 (Drosophila)       | 0.395 | 1.315 | 3.68E-03 | 3.68E-01 | Up |  |
| 8058552 | NM_005896   | IDH1     | isocitrate dehydrogenase 1 (NADP      | 0.646 | 1.565 | 3.30E-04 | 3.30E-02 | Up |  |
| 8061247 | NM_018993   | RIN2     | Ras and Rab interactor 2              | 0.438 | 1.354 | 4.68E-02 | 4.68E+00 | Up |  |
| 8064471 | NM_006065   | SIRPB1   | signal-regulatory protein beta 1      | 0.400 | 1.319 | 1.43E-03 | 1.43E-01 | Up |  |
| 8064808 | NM_005116   | SLC23A2  | solute carrier family 23 (nucleobas   | 0.503 | 1.417 | 2.97E-04 | 2.97E-02 | Up |  |
| 8066266 | NM_005461   | MAFB     | v-maf musculoaponeurotic fibrosa      | 0.523 | 1.437 | 2.16E-03 | 2.16E-01 | Up |  |
| 8067279 | NM_001336   | CTSZ     | cathepsin Z                           | 0.389 | 1.310 | 3.45E-02 | 3.45E+00 | Up |  |
| 8070826 | NM_000211   | ITGB2    | integrin, beta 2 (complement com      | 0.434 | 1.351 | 2.86E-03 | 2.86E-01 | Up |  |
| 8072015 | NM_005160   | ADRBK2   | adrenergic, beta, receptor kinase 2   | 0.540 | 1.454 | 1.81E-03 | 1.81E-01 | Up |  |
| 8073056 | NM_145699   | APOBEC3A | apolipoprotein B mRNA editing en      | 1.001 | 2.002 | 1.66E-03 | 1.66E-01 | Up |  |
| 8074237 | NM_017424   | CECR1    | cat eye syndrome chromosome re        | 0.644 | 1.563 | 3.48E-04 | 3.48E-02 | Up |  |
| 8075057 | ---         | ---      | ---                                   | 0.755 | 1.688 | 1.44E-02 | 1.44E+00 | Up |  |
| 8075709 | NM_030643   | APOL4    | apolipoprotein L, 4                   | 0.417 | 1.335 | 2.17E-02 | 2.17E+00 | Up |  |
| 8075956 | NM_006498   | LGALS2   | lectin, galactoside-binding, soluble  | 1.276 | 2.422 | 2.04E-02 | 2.04E+00 | Up |  |
| 8078252 | NM_152653   | UBE2E2   | ubiquitin-conjugating enzyme E2E      | 0.581 | 1.496 | 5.89E-04 | 5.89E-02 | Up |  |
| 8078729 | NM_002468   | MYD88    | myeloid differentiation primary re    | 0.331 | 1.258 | 2.63E-03 | 2.63E-01 | Up |  |
| 8079392 | NM_00112339 | CCR2     | chemokine (C-C motif) receptor 2      | 0.611 | 1.528 | 7.51E-03 | 7.51E-01 | Up |  |
| 8080938 | NM_198159   | MITF     | microphthalmia-associated transc      | 0.612 | 1.529 | 1.56E-02 | 1.56E+00 | Up |  |
| 8081431 | NM_001627   | ALCAM    | activated leukocyte cell adhesion     | 0.614 | 1.530 | 1.92E-03 | 1.92E-01 | Up |  |
| 8081503 | NM_014648   | DZIP3    | DAZ interacting protein 3, zinc fing  | 0.326 | 1.254 | 7.66E-03 | 7.66E-01 | Up |  |
| 8081740 | NM_001690   | ATP6V1A  | ATPase, H+ transporting, lysosomal    | 0.361 | 1.285 | 4.22E-02 | 4.22E+00 | Up |  |
| 8082003 | NM_018456   | EAF2     | ELL associated factor 2               | 0.495 | 1.410 | 2.56E-04 | 2.56E-02 | Up |  |
| 8082012 | NM_021082   | SLC15A2  | solute carrier family 15 (H+/peptid   | 0.407 | 1.326 | 7.80E-04 | 7.80E-02 | Up |  |
| 8082965 | NM_012219   | MRAS     | muscle RAS oncogene homolog           | 0.571 | 1.485 | 3.66E-03 | 3.66E-01 | Up |  |
| 8083656 | NM_022736   | MFSD1    | major facilitator superfamily doma    | 0.926 | 1.900 | 4.38E-04 | 4.38E-02 | Up |  |
| 8091511 | NM_014879   | P2RY14   | purinergic receptor P2Y, G-protein    | 0.750 | 1.682 | 1.72E-03 | 1.72E-01 | Up |  |
| 8091954 | NM_014498   | GOLIM4   | golgi integral membrane protein 4     | 0.341 | 1.267 | 2.41E-02 | 2.41E+00 | Up |  |
| 8092177 | NM_00114627 | NCEH1    | neutral cholesterol ester hydrolase   | 0.655 | 1.574 | 2.46E-02 | 2.46E+00 | Up |  |
| 8092251 | NM_021629   | GNB4     | guanine nucleotide binding protein    | 0.498 | 1.412 | 2.84E-02 | 2.84E+00 | Up |  |
| 8093294 | NM_00112304 | CCR2     | chemokine (C-C motif) receptor 2      | 0.912 | 1.882 | 3.05E-03 | 3.05E-01 | Up |  |
| 8094259 | NM_015907   | LAP3     | leucine aminopeptidase 3              | 0.669 | 1.590 | 2.58E-02 | 2.58E+00 | Up |  |
| 8094911 | NM_020453   | ATP10D   | ATPase, class V, type 10D             | 0.362 | 1.285 | 1.67E-02 | 1.67E+00 | Up |  |
| 8095343 | NM_012108   | STAP1    | signal transducing adaptor family 1   | 0.498 | 1.412 | 1.46E-02 | 1.46E+00 | Up |  |
| 8096617 | NM_017935   | BANK1    | B-cell scaffold protein with ankyrin  | 0.449 | 1.365 | 2.84E-02 | 2.84E+00 | Up |  |
| 8096733 | NM_00113625 | SGMS2    | sphingomyelin synthase 2              | 0.446 | 1.362 | 2.02E-02 | 2.02E+00 | Up |  |
| 8096917 | ---         | ---      | ---                                   | 0.347 | 1.272 | 4.55E-02 | 4.55E+00 | Up |  |
| 8097586 | NM_207123   | GAB1     | GRB2-associated binding protein 1     | 0.414 | 1.333 | 3.99E-02 | 3.99E+00 | Up |  |
| 8100827 | NM_144646   | IGJ      | immunoglobulin J polypeptide, lin     | 1.465 | 2.761 | 3.40E-04 | 3.40E-02 | Up |  |
| 8101158 | NM_005506   | SCARB2   | scavenger receptor class B, memb      | 1.035 | 2.050 | 1.92E-03 | 1.92E-01 | Up |  |
| 8101304 | NM_152545   | RASGEF1B | RasGEF domain family, member 1        | 0.742 | 1.673 | 2.42E-04 | 2.42E-02 | Up |  |
| 8101322 | AB014771    | MOP-1    | MOP-1                                 | 0.631 | 1.549 | 2.83E-02 | 2.83E+00 | Up |  |
| 8102362 | NM_052864   | TIFA     | TRAF-interacting protein with fork    | 0.460 | 1.375 | 9.74E-04 | 9.74E-02 | Up |  |
| 8102720 | NM_020337   | ANKRD50  | ankyrin repeat domain 50              | 0.494 | 1.408 | 2.58E-02 | 2.58E+00 | Up |  |
| 8103399 | NM_016205   | PDGFC    | platelet derived growth factor C      | 0.539 | 1.453 | 1.32E-02 | 1.32E+00 | Up |  |
| 8103508 | NM_017923   | 40238    | membrane-associated ring finger       | 0.652 | 1.572 | 7.31E-05 | 7.31E-03 | Up |  |
| 8105340 | NM_006144   | GZMA     | granzyme A (granzyme 1, cytotoxic     | 0.658 | 1.578 | 2.58E-02 | 2.58E+00 | Up |  |
| 8105481 | NM_152687   | GAPT     | GRB2-binding adaptor protein, tra     | 0.525 | 1.439 | 3.15E-02 | 3.15E+00 | Up |  |
| 8105663 | NM_020726   | NLN      | neurolysin (metallopeptidase M3)      | 0.966 | 1.953 | 1.04E-04 | 1.04E-02 | Up |  |
| 8107532 | NM_000414   | HSD17B4  | hydroxysteroid (17-beta) dehydro      | 0.381 | 1.302 | 2.32E-02 | 2.32E+00 | Up |  |
| 8107613 | NM_003100   | SNX2     | sorting nexin 2                       | 0.328 | 1.255 | 9.85E-04 | 9.85E-02 | Up |  |
| 8108217 | NM_000358   | TGFB1    | transforming growth factor, beta-1    | 1.530 | 2.888 | 3.63E-05 | 3.63E-03 | Up |  |
| 8109350 | NM_078483   | SLC36A1  | solute carrier family 36 (proton/a    | 0.465 | 1.380 | 2.39E-02 | 2.39E+00 | Up |  |
| 8112409 | NM_019072   | SGTB     | small glutamine-rich tetratricopep    | 0.475 | 1.390 | 2.34E-03 | 2.34E-01 | Up |  |
| 8114225 | NM_004893   | H2AFY    | H2A histone family, member Y          | 0.354 | 1.278 | 2.49E-03 | 2.49E-01 | Up |  |
| 8115076 | NM_005211   | CSF1R    | colony stimulating factor 1 recept    | 0.951 | 1.933 | 1.52E-03 | 1.52E-01 | Up |  |
| 8115464 | NM_032782   | HAVCR2   | hepatitis A virus cellular receptor 2 | 0.618 | 1.535 | 1.58E-02 | 1.58E+00 | Up |  |
| 8117286 | ---         | ---      | ---                                   | 0.741 | 1.671 | 1.56E-02 | 1.56E+00 | Up |  |
| 8118149 | NM_007161   | LST1     | leukocyte specific transcript 1       | 0.527 | 1.441 | 2.38E-03 | 2.38E-01 | Up |  |
| 8118324 | NM_000063   | C2       | complement component 2                | 0.541 | 1.455 | 4.35E-03 | 4.35E-01 | Up |  |
| 8118594 | NM_002121   | HLA-DPB1 | major histocompatibility complex,     | 0.493 | 1.408 | 6.46E-03 | 6.46E-01 | Up |  |
| 8123181 | NM_000876   | IGF2R    | insulin-like growth factor 2 recept   | 0.390 | 1.311 | 3.45E-02 | 3.45E+00 | Up |  |
| 8123315 | NM_206855   | QKI      | quaking homolog, KH domain RNA        | 0.342 | 1.268 | 4.27E-02 | 4.27E+00 | Up |  |
| 8124134 | NM_000367   | TPMT     | thiopurine S-methyltransferase        | 0.474 | 1.389 | 5.61E-03 | 5.61E-01 | Up |  |
| 8128123 | NM_021244   | RRAGD    | Ras-related GTP binding D             | 0.497 | 1.411 | 1.42E-02 | 1.42E+00 | Up |  |
| 8129254 | NM_005907   | MAN1A1   | mannosidase, alpha, class 1A, mem     | 0.338 | 1.264 | 3.27E-03 | 3.27E-01 | Up |  |
| 8129458 | NM_033515   | ARHGAP18 | Rho GTPase activating protein 18      | 1.047 | 2.067 | 1.14E-03 | 1.14E-01 | Up |  |
| 8129677 | NM_00114367 | SGK1     | serum/glucocorticoid regulated ki     | 0.575 | 1.490 | 2.38E-03 | 2.38E-01 | Up |  |
| 8129974 | NM_032020   | FUCA2    | fucosidase, alpha-L-2, plasma         | 0.509 | 1.423 | 7.02E-03 | 7.02E-01 | Up |  |
| 8131179 | NM_025250   | TTYH3    | twenty homolog 3 (Drosophila)         | 0.356 | 1.280 | 7.92E-03 | 7.92E-01 | Up |  |
| 8137264 | NM_018487   | TMEM176A | transmembrane protein 176A            | 0.632 | 1.550 | 2.62E-02 | 2.62E+00 | Up |  |
| 8138489 | NM_018719   | CDC47L   | cell division cycle associated 7-like | 0.400 | 1.320 | 2.46E-02 | 2.46E+00 | Up |  |

|         |             |          |                                      |        |       |          |          |      |  |
|---------|-------------|----------|--------------------------------------|--------|-------|----------|----------|------|--|
| 8138689 | NM_003930   | SKAP2    | src kinase associated phosphoprot    | 0.455  | 1.371 | 1.88E-02 | 1.88E+00 | Up   |  |
| 8139500 | NM_022748   | TNS3     | tensin 3                             | 0.628  | 1.545 | 3.25E-03 | 3.25E-01 | Up   |  |
| 8140367 | NM_002991   | CCL24    | chemokine (C-C motif) ligand 24      | 1.495  | 2.818 | 1.03E-02 | 1.03E+00 | Up   |  |
| 8140463 | NM_006682   | FGL2     | fibrinogen-like 2                    | 2.098  | 4.281 | 5.48E-06 | 5.48E-04 | Up   |  |
| 8140814 | NM_018843   | SLC25A40 | solute carrier family 25, member 4   | 0.362  | 1.286 | 1.18E-02 | 1.18E+00 | Up   |  |
| 8141094 | NM_002612   | PKD4     | pyruvate dehydrogenase kinase, is    | 0.759  | 1.692 | 1.58E-02 | 1.58E+00 | Up   |  |
| 8141107 | NM_00116021 | SLC25A13 | solute carrier family 25, member 1   | 0.399  | 1.318 | 6.55E-03 | 6.55E-01 | Up   |  |
| 8143790 | NM_014020   | TMEM176B | transmembrane protein 176B           | 0.840  | 1.790 | 5.85E-03 | 5.85E-01 | Up   |  |
| 8144917 | NM_000237   | LPL      | lipoprotein lipase                   | 0.793  | 1.733 | 3.63E-02 | 3.63E+00 | Up   |  |
| 8145293 | NM_014265   | ADAM28   | ADAM metalloproteinase domain 2      | 0.592  | 1.507 | 7.80E-03 | 7.80E-01 | Up   |  |
| 8145470 | NM_001386   | DPYSL2   | dihydropyrimidinase-like 2           | 0.531  | 1.445 | 1.53E-03 | 1.53E-01 | Up   |  |
| 8147132 | NM_000067   | CA2      | carbonic anhydrase II                | 0.487  | 1.401 | 1.68E-02 | 1.68E+00 | Up   |  |
| 8147724 | NM_001695   | ATP6V1C1 | ATPase, H+ transporting, lysosoma    | 0.364  | 1.287 | 2.55E-02 | 2.55E+00 | Up   |  |
| 8148194 | ---         | ---      | ---                                  | 0.401  | 1.321 | 2.75E-02 | 2.75E+00 | Up   |  |
| 8149534 | NM_004315   | ASAH1    | N-acylsphingosine amidohydrolase     | 0.510  | 1.424 | 2.96E-02 | 2.96E+00 | Up   |  |
| 8152522 | NM_006209   | ENPP2    | ectonucleotide pyrophosphatase/      | 1.860  | 3.629 | 6.04E-06 | 6.04E-04 | Up   |  |
| 8154207 | ---         | ---      | ---                                  | 0.594  | 1.510 | 3.68E-03 | 3.68E-01 | Up   |  |
| 8154209 | ---         | ---      | ---                                  | 0.472  | 1.387 | 1.92E-02 | 1.92E+00 | Up   |  |
| 8154245 | NM_025239   | PDCD1LG2 | programmed cell death 1 ligand 2     | 0.729  | 1.657 | 4.51E-02 | 4.51E+00 | Up   |  |
| 8154951 | NM_002065   | GLUL     | glutamate-ammonia ligase (glutan     | 0.995  | 1.993 | 1.37E-03 | 1.37E-01 | Up   |  |
| 8155192 | NM_022343   | GLIPR2   | GLI pathogenesis-related 2           | 0.397  | 1.317 | 4.14E-02 | 4.14E+00 | Up   |  |
| 8155930 | NM_001490   | GCNT1    | glucosaminyl (N-acetyl) transferas   | 0.364  | 1.287 | 3.33E-02 | 3.33E+00 | Up   |  |
| 8157270 | NM_001859   | SLC31A1  | solute carrier family 31 (copper tra | 0.803  | 1.745 | 1.16E-02 | 1.16E+00 | Up   |  |
| 8157761 | NM_00114500 | NEK6     | NIMA (never in mitosis gene a)-rel   | 0.324  | 1.252 | 2.99E-03 | 2.99E-01 | Up   |  |
| 8161004 | NM_001782   | CD72     | CD72 molecule                        | 0.514  | 1.428 | 2.65E-03 | 2.65E-01 | Up   |  |
| 8162502 | NM_000507   | FBP1     | fructose-1,6-bisphosphatase 1        | 1.006  | 2.008 | 7.75E-04 | 7.75E-02 | Up   |  |
| 8163452 | NM_015258   | FKBP15   | FK506 binding protein 15, 133kDa     | 0.391  | 1.311 | 2.04E-02 | 2.04E+00 | Up   |  |
| 8165011 | NM_002003   | FCN1     | ficolin (collagen/fibrinogen domai   | 0.658  | 1.578 | 1.21E-03 | 1.21E-01 | Up   |  |
| 8166805 | NM_005765   | ATP6AP2  | ATPase, H+ transporting, lysosoma    | 0.357  | 1.281 | 3.68E-03 | 3.68E-01 | Up   |  |
| 8173162 | ---         | ---      | ---                                  | 0.525  | 1.439 | 1.89E-02 | 1.89E+00 | Up   |  |
| 8174051 | NM_000061   | BTk      | Bruton agammaglobulinemia tyros      | 0.467  | 1.382 | 5.20E-03 | 5.20E-01 | Up   |  |
| 8176174 | NM_002436   | MPP1     | membrane protein, palmitoylated      | 1.036  | 2.050 | 2.65E-03 | 2.65E-01 | Up   |  |
| 8177988 | NM_007161   | LST1     | leukocyte specific transcript 1      | 0.527  | 1.441 | 2.38E-03 | 2.38E-01 | Up   |  |
| 8178095 | NM_000063   | C2       | complement component 2               | 0.553  | 1.467 | 3.68E-03 | 3.68E-01 | Up   |  |
| 8178220 | NM_002121   | HLA-DPB1 | major histocompatibility complex,    | 0.573  | 1.487 | 5.06E-03 | 5.06E-01 | Up   |  |
| 8179268 | NM_007161   | LST1     | leukocyte specific transcript 1      | 0.527  | 1.441 | 2.38E-03 | 2.38E-01 | Up   |  |
| 8179331 | NM_000063   | C2       | complement component 2               | 0.553  | 1.467 | 3.68E-03 | 3.68E-01 | Up   |  |
| 8179519 | NM_002121   | HLA-DPB1 | major histocompatibility complex,    | 0.541  | 1.455 | 1.46E-02 | 1.46E+00 | Up   |  |
| 7895527 | ---         | ---      | ---                                  | -0.381 | 0.768 | 2.62E-02 | 2.62E+00 | Down |  |
| 7896695 | ---         | ---      | ---                                  | -0.489 | 0.713 | 7.02E-03 | 7.02E-01 | Down |  |
| 7896712 | ---         | ---      | ---                                  | -0.607 | 0.657 | 2.84E-02 | 2.84E+00 | Down |  |
| 7896721 | ---         | ---      | ---                                  | -0.444 | 0.735 | 1.48E-02 | 1.48E+00 | Down |  |
| 7898375 | NR_004421   | RNU1A    | RNA, U1A small nuclear               | -0.670 | 0.629 | 2.56E-04 | 2.56E-02 | Down |  |
| 7898411 | NR_004421   | RNU1A    | RNA, U1A small nuclear               | -0.670 | 0.629 | 2.56E-04 | 2.56E-02 | Down |  |
| 7899502 | NR_004407   | RNU11    | RNA, U11 small nuclear               | -0.413 | 0.751 | 1.75E-02 | 1.75E+00 | Down |  |
| 7902227 | NM_001924   | GADD45A  | growth arrest and DNA-damage-in      | -0.359 | 0.780 | 1.14E-03 | 1.14E-01 | Down |  |
| 7907092 | NM_003953   | MPZL1    | myelin protein zero-like 1           | -0.366 | 0.776 | 1.96E-03 | 1.96E-01 | Down |  |
| 7908161 | NM_030806   | C1orf21  | chromosome 1 open reading fram       | -0.419 | 0.748 | 2.51E-02 | 2.51E+00 | Down |  |
| 7908388 | NM_002922   | RGS1     | regulator of G-protein signaling 1   | -0.649 | 0.638 | 2.42E-04 | 2.42E-02 | Down |  |
| 7908409 | NM_002923   | RGS2     | regulator of G-protein signaling 2,  | -0.357 | 0.781 | 2.03E-02 | 2.03E+00 | Down |  |
| 7912800 | NR_004421   | RNU1A    | RNA, U1A small nuclear               | -0.670 | 0.629 | 2.56E-04 | 2.56E-02 | Down |  |
| 7912850 | NR_004421   | RNU1A    | RNA, U1A small nuclear               | -0.670 | 0.629 | 2.56E-04 | 2.56E-02 | Down |  |
| 7919151 | ---         | ---      | ---                                  | -0.610 | 0.655 | 3.40E-04 | 3.40E-02 | Down |  |
| 7919155 | ---         | ---      | ---                                  | -0.476 | 0.719 | 2.84E-02 | 2.84E+00 | Down |  |
| 7919269 | NR_004421   | RNU1A    | RNA, U1A small nuclear               | -0.675 | 0.627 | 5.39E-04 | 5.39E-02 | Down |  |
| 7919349 | NR_004421   | RNU1A    | RNA, U1A small nuclear               | -0.675 | 0.627 | 5.39E-04 | 5.39E-02 | Down |  |
| 7919392 | ---         | ---      | ---                                  | -0.610 | 0.655 | 3.40E-04 | 3.40E-02 | Down |  |
| 7919405 | ---         | ---      | ---                                  | -0.476 | 0.719 | 2.84E-02 | 2.84E+00 | Down |  |
| 7919556 | ---         | ---      | ---                                  | -0.517 | 0.699 | 3.92E-02 | 3.92E+00 | Down |  |
| 7919576 | NR_004421   | RNU1A    | RNA, U1A small nuclear               | -0.670 | 0.629 | 2.56E-04 | 2.56E-02 | Down |  |
| 7920238 | NM_005621   | S100A12  | S100 calcium binding protein A12     | -0.931 | 0.524 | 3.63E-02 | 3.63E+00 | Down |  |
| 7921228 | NM_00114531 | ETV3     | ets variant 3                        | -0.347 | 0.786 | 3.68E-03 | 3.68E-01 | Down |  |
| 7922418 | NR_002579   | SNORD74  | small nucleolar RNA, C/D box 74      | -0.563 | 0.677 | 3.68E-03 | 3.68E-01 | Down |  |
| 7925929 | NM_003739   | AKR1C3   | aldo-keto reductase family 1, men    | -0.640 | 0.642 | 2.28E-03 | 2.28E-01 | Down |  |
| 7926037 | NM_004566   | PFKFB3   | 6-phosphofructo-2-kinase/fructos     | -0.618 | 0.652 | 2.97E-04 | 2.97E-02 | Down |  |
| 7928308 | NM_019058   | DDIT4    | DNA-damage-inducible transcript      | -0.554 | 0.681 | 4.28E-04 | 4.28E-02 | Down |  |
| 7928589 | NM_005729   | PPIF     | peptidylprolyl isomerase F           | -0.398 | 0.759 | 1.37E-03 | 1.37E-01 | Down |  |
| 7931914 | NM_000417   | IL2RA    | interleukin 2 receptor, alpha        | -1.032 | 0.489 | 1.26E-03 | 1.26E-01 | Down |  |
| 7933084 | NM_005746   | NAMPT    | nicotinamide phosphoribosyltrans     | -0.707 | 0.613 | 1.37E-03 | 1.37E-01 | Down |  |
| 7938396 | NM_000480   | AMPD3    | adenosine monophosphate deami        | -0.361 | 0.778 | 2.99E-03 | 2.99E-01 | Down |  |
| 7938485 | NM_014632   | MICAL2   | microtubule associated monooxyge     | -0.329 | 0.796 | 9.41E-03 | 9.41E-01 | Down |  |
| 7951271 | NM_002421   | MMP1     | matrix metalloproteinase 1 (interst  | -1.742 | 0.299 | 1.20E-04 | 1.20E-02 | Down |  |
| 7955963 | NM_058173   | MUC11    | mucin-like 1                         | -0.629 | 0.647 | 2.74E-03 | 2.74E-01 | Down |  |
| 7961798 | NM_152989   | SOX5     | SRY (sex determining region Y)-bo    | -0.627 | 0.647 | 1.37E-03 | 1.37E-01 | Down |  |
| 7970441 | NM_004004   | GJB2     | gap junction protein, beta 2, 26kD   | -0.474 | 0.720 | 5.72E-03 | 5.72E-01 | Down |  |
| 7972557 | NM_004951   | GPR183   | G protein-coupled receptor 183       | -0.379 | 0.769 | 4.69E-04 | 4.69E-02 | Down |  |
| 7973336 | NM_004995   | MMP14    | matrix metalloproteinase 14 (mem     | -0.784 | 0.581 | 1.06E-03 | 1.06E-01 | Down |  |

|         |             |              |                                      |        |       |          |          |      |  |
|---------|-------------|--------------|--------------------------------------|--------|-------|----------|----------|------|--|
| 7973896 | NR_004421   | RNU1A        | RNA, U1A small nuclear               | -0.663 | 0.632 | 2.56E-04 | 2.56E-02 | Down |  |
| 7975076 | NM_021979   | HSPA2        | heat shock 70kDa protein 2           | -0.416 | 0.750 | 7.92E-03 | 7.92E-01 | Down |  |
| 7978568 | NR_004421   | RNU1A        | RNA, U1A small nuclear               | -0.663 | 0.632 | 2.56E-04 | 2.56E-02 | Down |  |
| 7979131 | NM_053064   | GNG2         | guanine nucleotide binding protein   | -0.396 | 0.760 | 5.00E-02 | 5.00E+00 | Down |  |
| 7983490 | NR_022014   | C15orf21     | Dresden prostate cancer 2            | -0.707 | 0.613 | 3.48E-04 | 3.48E-02 | Down |  |
| 7988426 | NM_013309   | SLC30A4      | solute carrier family 30 (zinc trans | -0.552 | 0.682 | 5.52E-03 | 5.52E-01 | Down |  |
| 7989501 | NM_001218   | CA12         | carbonic anhydrase XII               | -0.894 | 0.538 | 3.68E-03 | 3.68E-01 | Down |  |
| 7993833 | NM_016025   | METTL9       | methyltransferase like 9             | -0.370 | 0.774 | 1.83E-03 | 1.83E-01 | Down |  |
| 7995787 | NM_176870   | MT1M         | metallothionein 1M                   | -0.679 | 0.625 | 2.04E-02 | 2.04E+00 | Down |  |
| 7995793 | NR_001447   | MT1L         | metallothionein 1L (gene/pseudog     | -0.634 | 0.644 | 6.17E-03 | 6.17E-01 | Down |  |
| 7995825 | NM_005949   | MT1F         | metallothionein 1F                   | -0.400 | 0.758 | 4.45E-02 | 4.45E+00 | Down |  |
| 7996837 | NM_004360   | CDH1         | cadherin 1, type 1, E-cadherin (epi  | -0.387 | 0.765 | 3.93E-04 | 3.93E-02 | Down |  |
| 7999387 | NM_001424   | EMP2         | epithelial membrane protein 2        | -0.398 | 0.759 | 1.62E-03 | 1.62E-01 | Down |  |
| 8002303 | NM_000903   | NQO1         | NAD(P)H dehydrogenase, quinone       | -0.782 | 0.582 | 1.48E-04 | 1.48E-02 | Down |  |
| 8005475 | NM_00103733 | TRIM16L      | tripartite motif-containing 16-like  | -0.396 | 0.760 | 4.85E-03 | 4.85E-01 | Down |  |
| 8007931 | NM_000212   | ITGB3        | integrin, beta 3 (platelet glycoprot | -1.155 | 0.449 | 4.98E-05 | 4.98E-03 | Down |  |
| 8016519 | ---         | ---          | ---                                  | -0.332 | 0.794 | 1.18E-03 | 1.18E-01 | Down |  |
| 8017096 | ---         | ---          | ---                                  | -0.880 | 0.543 | 3.57E-03 | 3.57E-01 | Down |  |
| 8017098 | ---         | ---          | ---                                  | -0.875 | 0.545 | 2.27E-03 | 2.27E-01 | Down |  |
| 8019796 | NM_002359   | MAFG         | v-maf musculoaponeurotic fibrosa     | -0.377 | 0.770 | 2.82E-03 | 2.82E-01 | Down |  |
| 8020164 | NM_182978   | GNAL         | guanine nucleotide binding protei    | -0.330 | 0.796 | 2.38E-02 | 2.38E+00 | Down |  |
| 8021635 | NM_00114381 | SERPINF2     | serpin peptidase inhibitor, clade B  | -1.471 | 0.361 | 7.43E-05 | 7.43E-03 | Down |  |
| 8025058 | NM_004240   | TRIP10       | thyroid hormone receptor interac     | -0.374 | 0.772 | 1.09E-02 | 1.09E+00 | Down |  |
| 8029693 | NM_006732   | FOSB         | FBJ murine osteosarcoma viral on     | -0.423 | 0.746 | 1.52E-03 | 1.52E-01 | Down |  |
| 8030128 | NM_014330   | PPP1R15A     | protein phosphatase 1, regulatory    | -0.507 | 0.704 | 5.70E-05 | 5.70E-03 | Down |  |
| 8031374 | NM_002000   | FCAR         | Fc fragment of IgA, receptor for     | -0.551 | 0.682 | 1.40E-02 | 1.40E+00 | Down |  |
| 8033257 | NM_000064   | C3           | complement component 3               | -0.838 | 0.560 | 2.53E-03 | 2.53E-01 | Down |  |
| 8034851 | NM_032571   | EMR3         | egf-like module containing, mucin    | -0.816 | 0.568 | 1.06E-03 | 1.06E-01 | Down |  |
| 8037374 | NM_002659   | PLAUR        | plasminogen activator, urokinase t   | -0.713 | 0.610 | 1.44E-02 | 1.44E+00 | Down |  |
| 8037387 | ---         | ---          | ---                                  | -0.974 | 0.509 | 4.97E-02 | 4.97E+00 | Down |  |
| 8045695 | ---         | ---          | ---                                  | -0.537 | 0.689 | 3.21E-02 | 3.21E+00 | Down |  |
| 8046861 | NM_002210   | ITGAV        | integrin, alpha V (vitronectin rece  | -0.443 | 0.736 | 4.01E-02 | 4.01E+00 | Down |  |
| 8052872 | NM_003236   | TGFA         | transforming growth factor, alpha    | -0.340 | 0.790 | 6.17E-05 | 6.17E-03 | Down |  |
| 8059578 | ---         | ---          | ---                                  | -1.231 | 0.426 | 5.39E-03 | 5.39E-01 | Down |  |
| 8065248 | AK097497    | LOC100130264 | hypothetical LOC100130264            | -0.424 | 0.745 | 2.12E-02 | 2.12E+00 | Down |  |
| 8065353 | NM_000361   | THBD         | thrombomodulin                       | -0.377 | 0.770 | 5.20E-04 | 5.20E-02 | Down |  |
| 8065359 | NM_012072   | CD93         | CD93 molecule                        | -0.931 | 0.525 | 3.35E-05 | 3.35E-03 | Down |  |
| 8068353 | NM_006933   | SLC5A3       | solute carrier family 5 (sodium/my   | -0.344 | 0.788 | 5.48E-06 | 5.48E-04 | Down |  |
| 8068361 | NM_006933   | SLC5A3       | solute carrier family 5 (sodium/my   | -0.456 | 0.729 | 5.48E-06 | 5.48E-04 | Down |  |
| 8068593 | NM_005239   | ETS2         | v-ets erythroblastosis virus E26 on  | -0.463 | 0.725 | 1.61E-02 | 1.61E+00 | Down |  |
| 8072229 | NM_021076   | NEFH         | neurofilament, heavy polypeptide     | -0.602 | 0.659 | 1.75E-04 | 1.75E-02 | Down |  |
| 8083569 | NM_015508   | TIPARP       | TCDD-inducible poly(ADP-ribose) p    | -0.452 | 0.731 | 5.65E-04 | 5.65E-02 | Down |  |
| 8091411 | NM_014220   | TM4SF1       | transmembrane 4 L six family mem     | -0.839 | 0.559 | 5.48E-06 | 5.48E-04 | Down |  |
| 8092348 | NM_014398   | LAMP3        | lysosomal-associated membrane p      | -0.475 | 0.719 | 3.68E-03 | 3.68E-01 | Down |  |
| 8092849 | NM_024524   | ATP13A3      | ATPase type 13A3                     | -0.459 | 0.728 | 1.23E-02 | 1.23E+00 | Down |  |
| 8095728 | NM_001432   | EREG         | epiregulin                           | -1.621 | 0.325 | 2.95E-05 | 2.95E-03 | Down |  |
| 8097256 | NM_002006   | FGF2         | fibroblast growth factor 2 (basic)   | -0.339 | 0.791 | 1.02E-04 | 1.02E-02 | Down |  |
| 8102787 | ---         | ---          | ---                                  | -0.637 | 0.643 | 8.16E-04 | 8.16E-02 | Down |  |
| 8105229 | NM_015946   | PELO         | pelota homolog (Drosophila)          | -0.374 | 0.771 | 5.51E-03 | 5.51E-01 | Down |  |
| 8106818 | ---         | ---          | ---                                  | -0.433 | 0.741 | 1.75E-02 | 1.75E+00 | Down |  |
| 8113433 | NM_001962   | EFNA5        | ephrin-A5                            | -0.341 | 0.789 | 1.87E-02 | 1.87E+00 | Down |  |
| 8114572 | NM_001945   | HBEFG        | heparin-binding EGF-like growth f    | -1.059 | 0.480 | 2.00E-04 | 2.00E-02 | Down |  |
| 8115490 | NM_033274   | ADAM19       | ADAM metallopeptidase domain 1       | -0.364 | 0.777 | 1.91E-02 | 1.91E+00 | Down |  |
| 8115831 | NM_004417   | DUSP1        | dual specificity phosphatase 1       | -0.542 | 0.687 | 9.92E-05 | 9.92E-03 | Down |  |
| 8116952 | ---         | ---          | ---                                  | -0.443 | 0.736 | 3.41E-02 | 3.41E+00 | Down |  |
| 8118314 | NM_005346   | HSPA1B       | heat shock 70kDa protein 1B          | -0.331 | 0.795 | 4.64E-03 | 4.64E-01 | Down |  |
| 8119088 | NM_078467   | CDKN1A       | cyclin-dependent kinase inhibitor    | -0.339 | 0.791 | 1.37E-03 | 1.37E-01 | Down |  |
| 8124848 | NM_003897   | IER3         | immediate early response 3           | -0.327 | 0.797 | 2.02E-03 | 2.02E-01 | Down |  |
| 8130556 | NM_00102446 | SOD2         | superoxide dismutase 2, mitochond    | -0.369 | 0.774 | 4.60E-02 | 4.60E+00 | Down |  |
| 8130628 | NM_020133   | AGPAT4       | 1-acylglycerol-3-phosphate O-acyl    | -0.399 | 0.759 | 1.51E-03 | 1.51E-01 | Down |  |
| 8130641 | NR_024277   | C6orf59      | chromosome 6 open reading fram       | -0.396 | 0.760 | 1.72E-02 | 1.72E+00 | Down |  |
| 8131666 | NM_002214   | ITGB8        | integrin, beta 8                     | -1.715 | 0.305 | 2.29E-05 | 2.29E-03 | Down |  |
| 8132725 | NM_003364   | UPP1         | uridine phosphorylase 1              | -0.403 | 0.756 | 1.68E-03 | 1.68E-01 | Down |  |
| 8134257 | NM_004126   | GNG11        | guanine nucleotide binding protei    | -0.675 | 0.626 | 4.72E-04 | 4.72E-02 | Down |  |
| 8135943 | ---         | ---          | ---                                  | -0.666 | 0.630 | 7.00E-03 | 7.00E-01 | Down |  |
| 8142120 | NM_005746   | NAMPT        | nicotinamide phosphoribosyltrans     | -0.671 | 0.628 | 9.99E-04 | 9.99E-02 | Down |  |
| 8145281 | NM_016612   | SLC25A37     | solute carrier family 25, member 3   | -1.355 | 0.391 | 7.82E-06 | 7.82E-04 | Down |  |
| 8145291 | AF495725    | SLC25A37     | solute carrier family 25, member 3   | -1.368 | 0.388 | 4.30E-05 | 4.30E-03 | Down |  |
| 8147503 | NM_018407   | LAPTM4B      | lysosomal protein transmembrane      | -0.323 | 0.799 | 3.99E-02 | 3.99E+00 | Down |  |
| 8151334 | NM_005098   | MSC          | musculin (activated B-cell factor-1  | -0.443 | 0.735 | 2.83E-02 | 2.83E+00 | Down |  |
| 8151457 | NM_012258   | HEY1         | hairy/enhancer-of-split related wi   | -0.323 | 0.800 | 2.46E-02 | 2.46E+00 | Down |  |
| 8153002 | NM_00113524 | NDRG1        | N-myc downstream regulated 1         | -0.479 | 0.718 | 3.40E-04 | 3.40E-02 | Down |  |
| 8156848 | NM_173198   | NR4A3        | nuclear receptor subfamily 4, grou   | -0.362 | 0.778 | 3.60E-03 | 3.60E-01 | Down |  |
| 8156897 | BC008993    | C9orf30      | chromosome 9 open reading fram       | -0.491 | 0.711 | 3.15E-04 | 3.15E-02 | Down |  |
| 8159900 | NM_152629   | GLIS3        | GLIS family zinc finger 3            | -0.501 | 0.707 | 3.42E-03 | 3.42E-01 | Down |  |
| 8161526 | AK127288    | LOC440896    | hypothetical LOC440896               | -0.401 | 0.757 | 1.61E-02 | 1.61E+00 | Down |  |
| 8163185 | NM_003329   | TXN          | thioredoxin                          | -0.360 | 0.779 | 1.65E-02 | 1.65E+00 | Down |  |

|         |           |        |                                     |        |       |          |          |      |  |
|---------|-----------|--------|-------------------------------------|--------|-------|----------|----------|------|--|
| 8167449 | NM_002668 | PLP2   | proteolipid protein 2 (colonic epit | -0.408 | 0.753 | 3.13E-03 | 3.13E-01 | Down |  |
| 8169634 | ---       | ---    | ---                                 | -0.580 | 0.669 | 6.70E-04 | 6.70E-02 | Down |  |
| 8178086 | NM_005346 | HSPA1B | heat shock 70kDa protein 1B         | -0.335 | 0.793 | 3.68E-03 | 3.68E-01 | Down |  |
| 8178435 | NM_003897 | IER3   | immediate early response 3          | -0.354 | 0.782 | 2.23E-03 | 2.23E-01 | Down |  |
| 8179324 | NM_005346 | HSPA1B | heat shock 70kDa protein 1B         | -0.335 | 0.793 | 3.68E-03 | 3.68E-01 | Down |  |
| 8179704 | NM_003897 | IER3   | immediate early response 3          | -0.327 | 0.797 | 2.02E-03 | 2.02E-01 | Down |  |
| 8180376 | ---       | ---    | ---                                 | -0.894 | 0.538 | 3.48E-04 | 3.48E-02 | Down |  |
| 7892501 | ---       | ---    | ---                                 | -0.184 | 0.880 | 7.48E-01 | 7.48E+01 |      |  |
| 7892504 | ---       | ---    | ---                                 | -0.068 | 0.954 | 7.56E-01 | 7.56E+01 |      |  |
| 7892507 | ---       | ---    | ---                                 | 0.018  | 1.013 | 9.77E-01 | 9.77E+01 |      |  |
| 7892509 | ---       | ---    | ---                                 | -0.022 | 0.985 | 9.53E-01 | 9.53E+01 |      |  |
| 7892512 | ---       | ---    | ---                                 | -0.032 | 0.978 | 9.55E-01 | 9.55E+01 |      |  |
| 7892514 | ---       | ---    | ---                                 | 0.041  | 1.029 | 8.91E-01 | 8.91E+01 |      |  |
| 7892515 | ---       | ---    | ---                                 | 0.085  | 1.061 | 5.31E-01 | 5.31E+01 |      |  |
| 7892516 | ---       | ---    | ---                                 | -0.127 | 0.915 | 5.49E-01 | 5.49E+01 |      |  |
| 7892517 | ---       | ---    | ---                                 | -0.275 | 0.827 | 6.56E-01 | 6.56E+01 |      |  |
| 7892519 | ---       | ---    | ---                                 | -0.108 | 0.928 | 6.70E-01 | 6.70E+01 |      |  |
| 7892520 | ---       | ---    | ---                                 | 0.032  | 1.022 | 8.47E-01 | 8.47E+01 |      |  |
| 7892521 | ---       | ---    | ---                                 | -0.195 | 0.874 | 6.94E-01 | 6.94E+01 |      |  |
| 7892522 | ---       | ---    | ---                                 | 0.086  | 1.061 | 7.75E-01 | 7.75E+01 |      |  |
| 7892524 | ---       | ---    | ---                                 | 0.041  | 1.029 | 9.44E-01 | 9.44E+01 |      |  |
| 7892525 | ---       | ---    | ---                                 | 0.172  | 1.127 | 3.50E-01 | 3.50E+01 |      |  |
| 7892526 | ---       | ---    | ---                                 | 0.061  | 1.043 | 9.35E-01 | 9.35E+01 |      |  |
| 7892527 | ---       | ---    | ---                                 | 0.035  | 1.025 | 9.36E-01 | 9.36E+01 |      |  |
| 7892529 | ---       | ---    | ---                                 | 0.148  | 1.108 | 4.68E-01 | 4.68E+01 |      |  |
| 7892530 | ---       | ---    | ---                                 | 0.002  | 1.001 | 9.91E-01 | 9.91E+01 |      |  |
| 7892531 | ---       | ---    | ---                                 | 0.403  | 1.322 | 2.36E-01 | 2.36E+01 |      |  |
| 7892533 | ---       | ---    | ---                                 | 0.019  | 1.013 | 9.23E-01 | 9.23E+01 |      |  |
| 7892535 | ---       | ---    | ---                                 | 0.251  | 1.190 | 7.09E-01 | 7.09E+01 |      |  |
| 7892536 | ---       | ---    | ---                                 | 0.051  | 1.036 | 9.10E-01 | 9.10E+01 |      |  |
| 7892538 | ---       | ---    | ---                                 | -0.211 | 0.864 | 4.15E-01 | 4.15E+01 |      |  |
| 7892539 | ---       | ---    | ---                                 | -0.177 | 0.885 | 6.16E-01 | 6.16E+01 |      |  |
| 7892540 | ---       | ---    | ---                                 | 0.175  | 1.129 | 6.91E-01 | 6.91E+01 |      |  |
| 7892541 | ---       | ---    | ---                                 | -0.066 | 0.955 | 8.06E-01 | 8.06E+01 |      |  |
| 7892542 | ---       | ---    | ---                                 | -0.052 | 0.964 | 9.17E-01 | 9.17E+01 |      |  |
| 7892543 | ---       | ---    | ---                                 | -0.082 | 0.945 | 8.31E-01 | 8.31E+01 |      |  |
| 7892544 | ---       | ---    | ---                                 | 0.234  | 1.176 | 4.12E-01 | 4.12E+01 |      |  |
| 7892545 | ---       | ---    | ---                                 | 0.100  | 1.072 | 7.61E-01 | 7.61E+01 |      |  |
| 7892547 | ---       | ---    | ---                                 | 0.047  | 1.033 | 9.44E-01 | 9.44E+01 |      |  |
| 7892548 | ---       | ---    | ---                                 | -0.043 | 0.970 | 9.32E-01 | 9.32E+01 |      |  |
| 7892549 | ---       | ---    | ---                                 | 0.029  | 1.020 | 9.38E-01 | 9.38E+01 |      |  |
| 7892550 | ---       | ---    | ---                                 | -0.024 | 0.984 | 9.51E-01 | 9.51E+01 |      |  |
| 7892551 | ---       | ---    | ---                                 | -0.026 | 0.982 | 8.81E-01 | 8.81E+01 |      |  |
| 7892553 | ---       | ---    | ---                                 | 0.128  | 1.093 | 7.09E-01 | 7.09E+01 |      |  |
| 7892554 | ---       | ---    | ---                                 | 0.215  | 1.161 | 3.87E-01 | 3.87E+01 |      |  |
| 7892555 | ---       | ---    | ---                                 | 0.069  | 1.049 | 8.04E-01 | 8.04E+01 |      |  |
| 7892556 | ---       | ---    | ---                                 | -0.016 | 0.989 | 8.64E-01 | 8.64E+01 |      |  |
| 7892559 | ---       | ---    | ---                                 | -0.103 | 0.931 | 5.91E-01 | 5.91E+01 |      |  |
| 7892560 | ---       | ---    | ---                                 | 0.074  | 1.053 | 9.23E-01 | 9.23E+01 |      |  |
| 7892561 | ---       | ---    | ---                                 | 0.121  | 1.087 | 4.23E-01 | 4.23E+01 |      |  |
| 7892562 | ---       | ---    | ---                                 | 0.009  | 1.006 | 9.74E-01 | 9.74E+01 |      |  |
| 7892563 | ---       | ---    | ---                                 | -0.121 | 0.920 | 5.55E-01 | 5.55E+01 |      |  |
| 7892564 | ---       | ---    | ---                                 | 0.018  | 1.013 | 9.72E-01 | 9.72E+01 |      |  |
| 7892565 | ---       | ---    | ---                                 | -0.056 | 0.962 | 8.20E-01 | 8.20E+01 |      |  |
| 7892567 | ---       | ---    | ---                                 | 0.117  | 1.084 | 7.48E-01 | 7.48E+01 |      |  |
| 7892568 | ---       | ---    | ---                                 | -0.031 | 0.979 | 8.73E-01 | 8.73E+01 |      |  |
| 7892569 | ---       | ---    | ---                                 | -0.306 | 0.809 | 1.48E-01 | 1.48E+01 |      |  |
| 7892570 | ---       | ---    | ---                                 | -0.111 | 0.926 | 8.50E-01 | 8.50E+01 |      |  |
| 7892572 | ---       | ---    | ---                                 | 0.024  | 1.017 | 9.85E-01 | 9.85E+01 |      |  |
| 7892573 | ---       | ---    | ---                                 | 0.122  | 1.088 | 7.17E-01 | 7.17E+01 |      |  |
| 7892574 | ---       | ---    | ---                                 | 0.167  | 1.122 | 5.79E-01 | 5.79E+01 |      |  |
| 7892575 | ---       | ---    | ---                                 | -0.009 | 0.994 | 9.79E-01 | 9.79E+01 |      |  |
| 7892576 | ---       | ---    | ---                                 | -0.002 | 0.999 | 9.96E-01 | 9.96E+01 |      |  |
| 7892578 | ---       | ---    | ---                                 | 0.121  | 1.087 | 7.51E-01 | 7.51E+01 |      |  |
| 7892579 | ---       | ---    | ---                                 | -0.012 | 0.992 | 9.73E-01 | 9.73E+01 |      |  |
| 7892583 | ---       | ---    | ---                                 | -0.133 | 0.912 | 7.51E-01 | 7.51E+01 |      |  |
| 7892584 | ---       | ---    | ---                                 | -0.135 | 0.911 | 4.81E-01 | 4.81E+01 |      |  |
| 7892587 | ---       | ---    | ---                                 | -0.123 | 0.918 | 7.38E-01 | 7.38E+01 |      |  |
| 7892589 | ---       | ---    | ---                                 | 0.065  | 1.046 | 9.53E-01 | 9.53E+01 |      |  |
| 7892592 | ---       | ---    | ---                                 | -0.038 | 0.974 | 9.43E-01 | 9.43E+01 |      |  |
| 7892594 | ---       | ---    | ---                                 | 0.034  | 1.024 | 9.64E-01 | 9.64E+01 |      |  |
| 7892596 | ---       | ---    | ---                                 | -0.033 | 0.978 | 9.66E-01 | 9.66E+01 |      |  |
| 7892597 | ---       | ---    | ---                                 | -0.114 | 0.924 | 7.92E-01 | 7.92E+01 |      |  |
| 7892598 | ---       | ---    | ---                                 | 0.214  | 1.160 | 5.09E-01 | 5.09E+01 |      |  |
| 7892599 | ---       | ---    | ---                                 | -0.160 | 0.895 | 5.78E-01 | 5.78E+01 |      |  |
| 7892604 | ---       | ---    | ---                                 | 0.215  | 1.161 | 6.92E-01 | 6.92E+01 |      |  |
| 7892605 | ---       | ---    | ---                                 | 0.036  | 1.025 | 9.53E-01 | 9.53E+01 |      |  |

|         |     |     |     |        |       |          |          |  |  |
|---------|-----|-----|-----|--------|-------|----------|----------|--|--|
| 7892606 | --- | --- | --- | 0.018  | 1.013 | 8.84E-01 | 8.84E+01 |  |  |
| 7892608 | --- | --- | --- | 0.073  | 1.052 | 5.72E-01 | 5.72E+01 |  |  |
| 7892610 | --- | --- | --- | -0.064 | 0.957 | 8.48E-01 | 8.48E+01 |  |  |
| 7892613 | --- | --- | --- | 0.056  | 1.040 | 7.50E-01 | 7.50E+01 |  |  |
| 7892615 | --- | --- | --- | 0.230  | 1.173 | 5.03E-01 | 5.03E+01 |  |  |
| 7892617 | --- | --- | --- | 0.025  | 1.018 | 7.91E-01 | 7.91E+01 |  |  |
| 7892618 | --- | --- | --- | 0.277  | 1.212 | 3.14E-01 | 3.14E+01 |  |  |
| 7892619 | --- | --- | --- | 0.208  | 1.155 | 7.63E-01 | 7.63E+01 |  |  |
| 7892620 | --- | --- | --- | -0.047 | 0.968 | 9.09E-01 | 9.09E+01 |  |  |
| 7892621 | --- | --- | --- | 0.045  | 1.032 | 7.68E-01 | 7.68E+01 |  |  |
| 7892622 | --- | --- | --- | 0.002  | 1.001 | 9.98E-01 | 9.98E+01 |  |  |
| 7892623 | --- | --- | --- | -0.073 | 0.950 | 8.14E-01 | 8.14E+01 |  |  |
| 7892625 | --- | --- | --- | 0.046  | 1.032 | 8.35E-01 | 8.35E+01 |  |  |
| 7892627 | --- | --- | --- | -0.133 | 0.912 | 3.58E-01 | 3.58E+01 |  |  |
| 7892628 | --- | --- | --- | -0.207 | 0.866 | 5.72E-01 | 5.72E+01 |  |  |
| 7892629 | --- | --- | --- | -0.059 | 0.960 | 9.50E-01 | 9.50E+01 |  |  |
| 7892630 | --- | --- | --- | 0.134  | 1.098 | 5.15E-01 | 5.15E+01 |  |  |
| 7892633 | --- | --- | --- | 0.193  | 1.144 | 4.89E-01 | 4.89E+01 |  |  |
| 7892634 | --- | --- | --- | 0.010  | 1.007 | 9.67E-01 | 9.67E+01 |  |  |
| 7892635 | --- | --- | --- | -0.174 | 0.886 | 3.72E-01 | 3.72E+01 |  |  |
| 7892636 | --- | --- | --- | 0.093  | 1.067 | 5.05E-01 | 5.05E+01 |  |  |
| 7892637 | --- | --- | --- | -0.140 | 0.908 | 7.27E-01 | 7.27E+01 |  |  |
| 7892639 | --- | --- | --- | 0.148  | 1.108 | 7.91E-01 | 7.91E+01 |  |  |
| 7892640 | --- | --- | --- | -0.110 | 0.927 | 5.15E-01 | 5.15E+01 |  |  |
| 7892641 | --- | --- | --- | 0.150  | 1.109 | 7.94E-01 | 7.94E+01 |  |  |
| 7892642 | --- | --- | --- | -0.004 | 0.997 | 9.87E-01 | 9.87E+01 |  |  |
| 7892643 | --- | --- | --- | 0.028  | 1.019 | 9.20E-01 | 9.20E+01 |  |  |
| 7892644 | --- | --- | --- | -0.009 | 0.994 | 9.81E-01 | 9.81E+01 |  |  |
| 7892647 | --- | --- | --- | 0.054  | 1.038 | 9.30E-01 | 9.30E+01 |  |  |
| 7892648 | --- | --- | --- | -0.072 | 0.951 | 6.91E-01 | 6.91E+01 |  |  |
| 7892650 | --- | --- | --- | -0.043 | 0.970 | 7.95E-01 | 7.95E+01 |  |  |
| 7892652 | --- | --- | --- | -0.072 | 0.951 | 8.36E-01 | 8.36E+01 |  |  |
| 7892654 | --- | --- | --- | 0.029  | 1.021 | 8.67E-01 | 8.67E+01 |  |  |
| 7892656 | --- | --- | --- | -0.293 | 0.816 | 5.18E-01 | 5.18E+01 |  |  |
| 7892661 | --- | --- | --- | 0.043  | 1.031 | 9.30E-01 | 9.30E+01 |  |  |
| 7892662 | --- | --- | --- | -0.274 | 0.827 | 7.24E-02 | 7.24E+00 |  |  |
| 7892663 | --- | --- | --- | 0.065  | 1.046 | 8.34E-01 | 8.34E+01 |  |  |
| 7892665 | --- | --- | --- | -0.155 | 0.898 | 4.59E-01 | 4.59E+01 |  |  |
| 7892667 | --- | --- | --- | -0.049 | 0.967 | 8.04E-01 | 8.04E+01 |  |  |
| 7892668 | --- | --- | --- | 0.178  | 1.132 | 3.49E-01 | 3.49E+01 |  |  |
| 7892669 | --- | --- | --- | -0.004 | 0.997 | 9.90E-01 | 9.90E+01 |  |  |
| 7892670 | --- | --- | --- | 0.068  | 1.048 | 7.95E-01 | 7.95E+01 |  |  |
| 7892672 | --- | --- | --- | 0.229  | 1.172 | 5.04E-01 | 5.04E+01 |  |  |
| 7892673 | --- | --- | --- | -0.003 | 0.998 | 9.91E-01 | 9.91E+01 |  |  |
| 7892674 | --- | --- | --- | -0.114 | 0.924 | 7.98E-01 | 7.98E+01 |  |  |
| 7892675 | --- | --- | --- | 0.232  | 1.175 | 3.86E-01 | 3.86E+01 |  |  |
| 7892676 | --- | --- | --- | 0.150  | 1.110 | 7.34E-01 | 7.34E+01 |  |  |
| 7892677 | --- | --- | --- | -0.026 | 0.982 | 8.50E-01 | 8.50E+01 |  |  |
| 7892678 | --- | --- | --- | 0.059  | 1.042 | 9.23E-01 | 9.23E+01 |  |  |
| 7892680 | --- | --- | --- | 0.009  | 1.006 | 9.76E-01 | 9.76E+01 |  |  |
| 7892681 | --- | --- | --- | -0.183 | 0.881 | 1.68E-01 | 1.68E+01 |  |  |
| 7892682 | --- | --- | --- | 0.007  | 1.005 | 9.89E-01 | 9.89E+01 |  |  |
| 7892683 | --- | --- | --- | 0.026  | 1.018 | 9.82E-01 | 9.82E+01 |  |  |
| 7892684 | --- | --- | --- | 0.137  | 1.100 | 5.61E-01 | 5.61E+01 |  |  |
| 7892686 | --- | --- | --- | -0.018 | 0.988 | 9.25E-01 | 9.25E+01 |  |  |
| 7892688 | --- | --- | --- | -0.121 | 0.920 | 8.35E-01 | 8.35E+01 |  |  |
| 7892689 | --- | --- | --- | 0.015  | 1.010 | 9.79E-01 | 9.79E+01 |  |  |
| 7892692 | --- | --- | --- | -0.036 | 0.975 | 9.16E-01 | 9.16E+01 |  |  |
| 7892693 | --- | --- | --- | -0.096 | 0.936 | 7.27E-01 | 7.27E+01 |  |  |
| 7892694 | --- | --- | --- | -0.130 | 0.914 | 5.55E-01 | 5.55E+01 |  |  |
| 7892695 | --- | --- | --- | 0.028  | 1.020 | 9.49E-01 | 9.49E+01 |  |  |
| 7892696 | --- | --- | --- | -0.049 | 0.967 | 8.93E-01 | 8.93E+01 |  |  |
| 7892697 | --- | --- | --- | 0.088  | 1.063 | 6.14E-01 | 6.14E+01 |  |  |
| 7892699 | --- | --- | --- | -0.032 | 0.978 | 8.92E-01 | 8.92E+01 |  |  |
| 7892701 | --- | --- | --- | 0.087  | 1.062 | 5.52E-01 | 5.52E+01 |  |  |
| 7892702 | --- | --- | --- | 0.109  | 1.078 | 8.64E-01 | 8.64E+01 |  |  |
| 7892703 | --- | --- | --- | 0.023  | 1.016 | 9.34E-01 | 9.34E+01 |  |  |
| 7892704 | --- | --- | --- | 0.045  | 1.032 | 8.52E-01 | 8.52E+01 |  |  |
| 7892706 | --- | --- | --- | 0.042  | 1.030 | 9.73E-01 | 9.73E+01 |  |  |
| 7892707 | --- | --- | --- | -0.002 | 0.999 | 9.92E-01 | 9.92E+01 |  |  |
| 7892711 | --- | --- | --- | -0.097 | 0.935 | 9.23E-01 | 9.23E+01 |  |  |
| 7892712 | --- | --- | --- | 0.055  | 1.039 | 7.89E-01 | 7.89E+01 |  |  |
| 7892713 | --- | --- | --- | -0.021 | 0.985 | 9.20E-01 | 9.20E+01 |  |  |
| 7892719 | --- | --- | --- | 0.066  | 1.047 | 6.89E-01 | 6.89E+01 |  |  |
| 7892720 | --- | --- | --- | -0.043 | 0.970 | 7.97E-01 | 7.97E+01 |  |  |
| 7892721 | --- | --- | --- | 0.008  | 1.005 | 9.75E-01 | 9.75E+01 |  |  |
| 7892726 | --- | --- | --- | 0.000  | 1.000 | 1.00E+00 | 1.00E+02 |  |  |



|         |     |     |     |        |       |          |          |  |  |
|---------|-----|-----|-----|--------|-------|----------|----------|--|--|
| 7892729 | --- | --- | --- | -0.038 | 0.974 | 9.60E-01 | 9.60E+01 |  |  |
| 7892732 | --- | --- | --- | -0.035 | 0.976 | 9.77E-01 | 9.77E+01 |  |  |
| 7892733 | --- | --- | --- | 0.041  | 1.029 | 9.56E-01 | 9.56E+01 |  |  |
| 7892735 | --- | --- | --- | -0.039 | 0.973 | 9.50E-01 | 9.50E+01 |  |  |
| 7892736 | --- | --- | --- | -0.102 | 0.932 | 7.38E-01 | 7.38E+01 |  |  |
| 7892738 | --- | --- | --- | -0.004 | 0.997 | 9.90E-01 | 9.90E+01 |  |  |
| 7892740 | --- | --- | --- | -0.078 | 0.947 | 9.43E-01 | 9.43E+01 |  |  |
| 7892742 | --- | --- | --- | 0.091  | 1.065 | 6.66E-01 | 6.66E+01 |  |  |
| 7892744 | --- | --- | --- | -0.141 | 0.907 | 7.75E-01 | 7.75E+01 |  |  |
| 7892745 | --- | --- | --- | -0.125 | 0.917 | 4.75E-01 | 4.75E+01 |  |  |
| 7892747 | --- | --- | --- | -0.140 | 0.907 | 3.95E-01 | 3.95E+01 |  |  |
| 7892748 | --- | --- | --- | 0.013  | 1.009 | 9.51E-01 | 9.51E+01 |  |  |
| 7892749 | --- | --- | --- | 0.200  | 1.148 | 6.97E-01 | 6.97E+01 |  |  |
| 7892750 | --- | --- | --- | -0.014 | 0.991 | 9.83E-01 | 9.83E+01 |  |  |
| 7892751 | --- | --- | --- | -0.010 | 0.993 | 9.66E-01 | 9.66E+01 |  |  |
| 7892753 | --- | --- | --- | 0.032  | 1.022 | 7.75E-01 | 7.75E+01 |  |  |
| 7892754 | --- | --- | --- | 0.001  | 1.000 | 1.00E+00 | 1.00E+02 |  |  |
| 7892757 | --- | --- | --- | 0.055  | 1.039 | 9.22E-01 | 9.22E+01 |  |  |
| 7892758 | --- | --- | --- | -0.205 | 0.867 | 7.17E-01 | 7.17E+01 |  |  |
| 7892759 | --- | --- | --- | 0.152  | 1.111 | 5.62E-01 | 5.62E+01 |  |  |
| 7892760 | --- | --- | --- | 0.021  | 1.015 | 9.67E-01 | 9.67E+01 |  |  |
| 7892761 | --- | --- | --- | 0.214  | 1.160 | 3.04E-01 | 3.04E+01 |  |  |
| 7892762 | --- | --- | --- | 0.088  | 1.063 | 4.59E-01 | 4.59E+01 |  |  |
| 7892763 | --- | --- | --- | 0.052  | 1.037 | 8.41E-01 | 8.41E+01 |  |  |
| 7892764 | --- | --- | --- | -0.167 | 0.891 | 3.99E-01 | 3.99E+01 |  |  |
| 7892765 | --- | --- | --- | 0.086  | 1.062 | 6.42E-01 | 6.42E+01 |  |  |
| 7892766 | --- | --- | --- | 0.109  | 1.079 | 6.05E-01 | 6.05E+01 |  |  |
| 7892769 | --- | --- | --- | 0.625  | 1.543 | 1.98E-01 | 1.98E+01 |  |  |
| 7892770 | --- | --- | --- | -0.031 | 0.978 | 9.30E-01 | 9.30E+01 |  |  |
| 7892771 | --- | --- | --- | 0.081  | 1.058 | 8.67E-01 | 8.67E+01 |  |  |
| 7892773 | --- | --- | --- | 0.028  | 1.019 | 9.32E-01 | 9.32E+01 |  |  |
| 7892774 | --- | --- | --- | 0.070  | 1.050 | 8.78E-01 | 8.78E+01 |  |  |
| 7892775 | --- | --- | --- | 0.028  | 1.019 | 9.74E-01 | 9.74E+01 |  |  |
| 7892776 | --- | --- | --- | -0.018 | 0.988 | 9.37E-01 | 9.37E+01 |  |  |
| 7892777 | --- | --- | --- | 0.021  | 1.015 | 9.72E-01 | 9.72E+01 |  |  |
| 7892778 | --- | --- | --- | -0.067 | 0.955 | 7.94E-01 | 7.94E+01 |  |  |
| 7892780 | --- | --- | --- | 0.130  | 1.094 | 5.91E-01 | 5.91E+01 |  |  |
| 7892781 | --- | --- | --- | 0.144  | 1.105 | 7.43E-01 | 7.43E+01 |  |  |
| 7892782 | --- | --- | --- | 0.011  | 1.008 | 9.49E-01 | 9.49E+01 |  |  |
| 7892783 | --- | --- | --- | 0.082  | 1.059 | 4.43E-01 | 4.43E+01 |  |  |
| 7892784 | --- | --- | --- | -0.207 | 0.866 | 7.69E-01 | 7.69E+01 |  |  |
| 7892785 | --- | --- | --- | -0.060 | 0.959 | 9.24E-01 | 9.24E+01 |  |  |
| 7892786 | --- | --- | --- | -0.011 | 0.993 | 9.86E-01 | 9.86E+01 |  |  |
| 7892787 | --- | --- | --- | -0.263 | 0.833 | 8.25E-01 | 8.25E+01 |  |  |
| 7892788 | --- | --- | --- | -0.017 | 0.988 | 9.55E-01 | 9.55E+01 |  |  |
| 7892789 | --- | --- | --- | -0.058 | 0.960 | 9.51E-01 | 9.51E+01 |  |  |
| 7892791 | --- | --- | --- | 0.026  | 1.018 | 8.57E-01 | 8.57E+01 |  |  |
| 7892792 | --- | --- | --- | 0.082  | 1.058 | 7.92E-01 | 7.92E+01 |  |  |
| 7892793 | --- | --- | --- | 0.163  | 1.120 | 5.26E-01 | 5.26E+01 |  |  |
| 7892794 | --- | --- | --- | 0.235  | 1.177 | 5.89E-01 | 5.89E+01 |  |  |
| 7892795 | --- | --- | --- | 0.080  | 1.057 | 7.37E-01 | 7.37E+01 |  |  |
| 7892796 | --- | --- | --- | 0.009  | 1.006 | 9.54E-01 | 9.54E+01 |  |  |
| 7892797 | --- | --- | --- | 0.003  | 1.002 | 9.91E-01 | 9.91E+01 |  |  |
| 7892802 | --- | --- | --- | 0.199  | 1.148 | 6.76E-01 | 6.76E+01 |  |  |
| 7892803 | --- | --- | --- | -0.017 | 0.988 | 9.07E-01 | 9.07E+01 |  |  |
| 7892807 | --- | --- | --- | 0.066  | 1.047 | 8.91E-01 | 8.91E+01 |  |  |
| 7892808 | --- | --- | --- | -0.033 | 0.977 | 9.23E-01 | 9.23E+01 |  |  |
| 7892812 | --- | --- | --- | -0.013 | 0.991 | 9.84E-01 | 9.84E+01 |  |  |
| 7892813 | --- | --- | --- | 0.173  | 1.128 | 8.07E-01 | 8.07E+01 |  |  |
| 7892814 | --- | --- | --- | 0.038  | 1.026 | 8.06E-01 | 8.06E+01 |  |  |
| 7892816 | --- | --- | --- | 0.048  | 1.034 | 7.62E-01 | 7.62E+01 |  |  |
| 7892817 | --- | --- | --- | 0.073  | 1.052 | 6.39E-01 | 6.39E+01 |  |  |
| 7892819 | --- | --- | --- | 0.597  | 1.513 | 1.58E-01 | 1.58E+01 |  |  |
| 7892820 | --- | --- | --- | -0.004 | 0.997 | 9.81E-01 | 9.81E+01 |  |  |
| 7892823 | --- | --- | --- | 0.052  | 1.037 | 9.03E-01 | 9.03E+01 |  |  |
| 7892824 | --- | --- | --- | 0.006  | 1.004 | 9.77E-01 | 9.77E+01 |  |  |
| 7892825 | --- | --- | --- | 0.033  | 1.023 | 9.15E-01 | 9.15E+01 |  |  |
| 7892826 | --- | --- | --- | 0.086  | 1.061 | 8.85E-01 | 8.85E+01 |  |  |
| 7892827 | --- | --- | --- | 0.023  | 1.016 | 8.61E-01 | 8.61E+01 |  |  |
| 7892829 | --- | --- | --- | 0.024  | 1.017 | 8.78E-01 | 8.78E+01 |  |  |
| 7892830 | --- | --- | --- | 0.131  | 1.095 | 5.36E-01 | 5.36E+01 |  |  |
| 7892831 | --- | --- | --- | -0.013 | 0.991 | 9.68E-01 | 9.68E+01 |  |  |
| 7892832 | --- | --- | --- | -0.059 | 0.960 | 8.25E-01 | 8.25E+01 |  |  |
| 7892835 | --- | --- | --- | -0.108 | 0.928 | 6.47E-01 | 6.47E+01 |  |  |
| 7892836 | --- | --- | --- | 0.111  | 1.080 | 2.82E-01 | 2.82E+01 |  |  |
| 7892837 | --- | --- | --- | -0.085 | 0.943 | 8.41E-01 | 8.41E+01 |  |  |
| 7892838 | --- | --- | --- | 0.018  | 1.012 | 9.50E-01 | 9.50E+01 |  |  |

|         |     |     |     |        |       |          |          |  |  |
|---------|-----|-----|-----|--------|-------|----------|----------|--|--|
| 7892840 | --- | --- | --- | 0.215  | 1.160 | 6.44E-01 | 6.44E+01 |  |  |
| 7892841 | --- | --- | --- | -0.095 | 0.936 | 7.03E-01 | 7.03E+01 |  |  |
| 7892844 | --- | --- | --- | 0.021  | 1.014 | 9.66E-01 | 9.66E+01 |  |  |
| 7892845 | --- | --- | --- | 0.016  | 1.011 | 9.57E-01 | 9.57E+01 |  |  |
| 7892846 | --- | --- | --- | 0.029  | 1.020 | 7.87E-01 | 7.87E+01 |  |  |
| 7892847 | --- | --- | --- | -0.085 | 0.943 | 7.69E-01 | 7.69E+01 |  |  |
| 7892848 | --- | --- | --- | -0.140 | 0.907 | 4.29E-01 | 4.29E+01 |  |  |
| 7892850 | --- | --- | --- | 0.138  | 1.101 | 5.87E-01 | 5.87E+01 |  |  |
| 7892851 | --- | --- | --- | -0.174 | 0.886 | 5.52E-01 | 5.52E+01 |  |  |
| 7892852 | --- | --- | --- | -0.080 | 0.946 | 7.52E-01 | 7.52E+01 |  |  |
| 7892853 | --- | --- | --- | -0.010 | 0.993 | 9.27E-01 | 9.27E+01 |  |  |
| 7892855 | --- | --- | --- | 0.093  | 1.067 | 8.32E-01 | 8.32E+01 |  |  |
| 7892856 | --- | --- | --- | -0.288 | 0.819 | 5.29E-01 | 5.29E+01 |  |  |
| 7892857 | --- | --- | --- | 0.003  | 1.002 | 9.91E-01 | 9.91E+01 |  |  |
| 7892859 | --- | --- | --- | -0.133 | 0.912 | 4.97E-01 | 4.97E+01 |  |  |
| 7892860 | --- | --- | --- | -0.058 | 0.961 | 8.04E-01 | 8.04E+01 |  |  |
| 7892861 | --- | --- | --- | 0.109  | 1.079 | 4.37E-01 | 4.37E+01 |  |  |
| 7892862 | --- | --- | --- | 0.089  | 1.063 | 4.62E-01 | 4.62E+01 |  |  |
| 7892863 | --- | --- | --- | 0.055  | 1.039 | 8.36E-01 | 8.36E+01 |  |  |
| 7892864 | --- | --- | --- | 0.219  | 1.164 | 4.70E-01 | 4.70E+01 |  |  |
| 7892865 | --- | --- | --- | 0.090  | 1.064 | 4.81E-01 | 4.81E+01 |  |  |
| 7892868 | --- | --- | --- | 0.051  | 1.036 | 8.45E-01 | 8.45E+01 |  |  |
| 7892869 | --- | --- | --- | -0.145 | 0.905 | 5.46E-01 | 5.46E+01 |  |  |
| 7892870 | --- | --- | --- | -0.052 | 0.965 | 9.00E-01 | 9.00E+01 |  |  |
| 7892871 | --- | --- | --- | 0.076  | 1.054 | 8.33E-01 | 8.33E+01 |  |  |
| 7892872 | --- | --- | --- | -0.157 | 0.897 | 6.39E-01 | 6.39E+01 |  |  |
| 7892873 | --- | --- | --- | 0.085  | 1.061 | 9.49E-01 | 9.49E+01 |  |  |
| 7892875 | --- | --- | --- | -0.163 | 0.893 | 5.36E-01 | 5.36E+01 |  |  |
| 7892876 | --- | --- | --- | -0.025 | 0.982 | 9.53E-01 | 9.53E+01 |  |  |
| 7892878 | --- | --- | --- | 0.272  | 1.208 | 5.64E-01 | 5.64E+01 |  |  |
| 7892880 | --- | --- | --- | 0.172  | 1.127 | 2.63E-01 | 2.63E+01 |  |  |
| 7892882 | --- | --- | --- | -0.099 | 0.933 | 6.40E-01 | 6.40E+01 |  |  |
| 7892884 | --- | --- | --- | -0.113 | 0.925 | 5.15E-01 | 5.15E+01 |  |  |
| 7892886 | --- | --- | --- | 0.103  | 1.074 | 8.23E-01 | 8.23E+01 |  |  |
| 7892889 | --- | --- | --- | 0.067  | 1.048 | 5.53E-01 | 5.53E+01 |  |  |
| 7892890 | --- | --- | --- | -0.098 | 0.934 | 5.28E-01 | 5.28E+01 |  |  |
| 7892891 | --- | --- | --- | 0.012  | 1.008 | 9.62E-01 | 9.62E+01 |  |  |
| 7892893 | --- | --- | --- | -0.092 | 0.938 | 5.11E-01 | 5.11E+01 |  |  |
| 7892894 | --- | --- | --- | 0.041  | 1.029 | 9.05E-01 | 9.05E+01 |  |  |
| 7892896 | --- | --- | --- | -0.033 | 0.977 | 8.63E-01 | 8.63E+01 |  |  |
| 7892897 | --- | --- | --- | 0.026  | 1.018 | 9.49E-01 | 9.49E+01 |  |  |
| 7892898 | --- | --- | --- | -0.067 | 0.955 | 7.12E-01 | 7.12E+01 |  |  |
| 7892899 | --- | --- | --- | 0.009  | 1.006 | 9.67E-01 | 9.67E+01 |  |  |
| 7892900 | --- | --- | --- | 0.038  | 1.027 | 8.27E-01 | 8.27E+01 |  |  |
| 7892901 | --- | --- | --- | 0.095  | 1.068 | 6.28E-01 | 6.28E+01 |  |  |
| 7892902 | --- | --- | --- | -0.017 | 0.988 | 8.84E-01 | 8.84E+01 |  |  |
| 7892903 | --- | --- | --- | -0.107 | 0.928 | 7.91E-01 | 7.91E+01 |  |  |
| 7892905 | --- | --- | --- | -0.312 | 0.806 | 5.52E-01 | 5.52E+01 |  |  |
| 7892906 | --- | --- | --- | -0.064 | 0.957 | 7.15E-01 | 7.15E+01 |  |  |
| 7892907 | --- | --- | --- | 0.007  | 1.005 | 9.75E-01 | 9.75E+01 |  |  |
| 7892908 | --- | --- | --- | -0.157 | 0.897 | 6.57E-01 | 6.57E+01 |  |  |
| 7892909 | --- | --- | --- | -0.093 | 0.938 | 7.55E-01 | 7.55E+01 |  |  |
| 7892910 | --- | --- | --- | 0.320  | 1.248 | 3.44E-01 | 3.44E+01 |  |  |
| 7892911 | --- | --- | --- | 0.078  | 1.056 | 7.50E-01 | 7.50E+01 |  |  |
| 7892913 | --- | --- | --- | 0.192  | 1.143 | 5.98E-01 | 5.98E+01 |  |  |
| 7892915 | --- | --- | --- | 0.177  | 1.131 | 6.59E-01 | 6.59E+01 |  |  |
| 7892916 | --- | --- | --- | -0.054 | 0.963 | 6.47E-01 | 6.47E+01 |  |  |
| 7892918 | --- | --- | --- | 0.067  | 1.047 | 8.88E-01 | 8.88E+01 |  |  |
| 7892919 | --- | --- | --- | -0.139 | 0.908 | 6.11E-01 | 6.11E+01 |  |  |
| 7892920 | --- | --- | --- | 0.145  | 1.106 | 5.59E-01 | 5.59E+01 |  |  |
| 7892922 | --- | --- | --- | 0.081  | 1.057 | 7.98E-01 | 7.98E+01 |  |  |
| 7892924 | --- | --- | --- | -0.014 | 0.990 | 9.55E-01 | 9.55E+01 |  |  |
| 7892925 | --- | --- | --- | 0.056  | 1.039 | 8.05E-01 | 8.05E+01 |  |  |
| 7892926 | --- | --- | --- | 0.061  | 1.043 | 7.41E-01 | 7.41E+01 |  |  |
| 7892928 | --- | --- | --- | 0.051  | 1.036 | 6.06E-01 | 6.06E+01 |  |  |
| 7892930 | --- | --- | --- | 0.025  | 1.017 | 8.91E-01 | 8.91E+01 |  |  |
| 7892931 | --- | --- | --- | -0.009 | 0.994 | 9.86E-01 | 9.86E+01 |  |  |
| 7892932 | --- | --- | --- | -0.059 | 0.960 | 8.42E-01 | 8.42E+01 |  |  |
| 7892933 | --- | --- | --- | -0.125 | 0.917 | 6.91E-01 | 6.91E+01 |  |  |
| 7892934 | --- | --- | --- | 0.002  | 1.002 | 9.97E-01 | 9.97E+01 |  |  |
| 7892935 | --- | --- | --- | 0.016  | 1.011 | 9.54E-01 | 9.54E+01 |  |  |
| 7892936 | --- | --- | --- | -0.140 | 0.907 | 8.69E-01 | 8.69E+01 |  |  |
| 7892937 | --- | --- | --- | 0.105  | 1.075 | 6.66E-01 | 6.66E+01 |  |  |
| 7892938 | --- | --- | --- | -0.093 | 0.938 | 7.92E-01 | 7.92E+01 |  |  |
| 7892939 | --- | --- | --- | 0.121  | 1.087 | 5.97E-01 | 5.97E+01 |  |  |
| 7892940 | --- | --- | --- | 0.008  | 1.006 | 9.69E-01 | 9.69E+01 |  |  |
| 7892941 | --- | --- | --- | -0.003 | 0.998 | 9.90E-01 | 9.90E+01 |  |  |

|         |     |     |     |        |       |          |          |  |  |
|---------|-----|-----|-----|--------|-------|----------|----------|--|--|
| 7892944 | --- | --- | --- | -0.183 | 0.881 | 4.47E-01 | 4.47E+01 |  |  |
| 7892947 | --- | --- | --- | 0.022  | 1.015 | 9.53E-01 | 9.53E+01 |  |  |
| 7892948 | --- | --- | --- | 0.023  | 1.016 | 9.09E-01 | 9.09E+01 |  |  |
| 7892949 | --- | --- | --- | -0.040 | 0.973 | 9.60E-01 | 9.60E+01 |  |  |
| 7892951 | --- | --- | --- | 0.021  | 1.015 | 9.55E-01 | 9.55E+01 |  |  |
| 7892952 | --- | --- | --- | 0.091  | 1.065 | 8.78E-01 | 8.78E+01 |  |  |
| 7892953 | --- | --- | --- | 0.065  | 1.046 | 7.47E-01 | 7.47E+01 |  |  |
| 7892954 | --- | --- | --- | 0.089  | 1.063 | 7.33E-01 | 7.33E+01 |  |  |
| 7892955 | --- | --- | --- | 0.015  | 1.011 | 9.50E-01 | 9.50E+01 |  |  |
| 7892956 | --- | --- | --- | 0.027  | 1.019 | 8.13E-01 | 8.13E+01 |  |  |
| 7892957 | --- | --- | --- | -0.024 | 0.984 | 9.56E-01 | 9.56E+01 |  |  |
| 7892958 | --- | --- | --- | 0.128  | 1.093 | 8.45E-01 | 8.45E+01 |  |  |
| 7892959 | --- | --- | --- | -0.058 | 0.961 | 7.94E-01 | 7.94E+01 |  |  |
| 7892960 | --- | --- | --- | 0.063  | 1.045 | 5.71E-01 | 5.71E+01 |  |  |
| 7892961 | --- | --- | --- | -0.045 | 0.969 | 8.78E-01 | 8.78E+01 |  |  |
| 7892962 | --- | --- | --- | 0.445  | 1.361 | 4.86E-01 | 4.86E+01 |  |  |
| 7892966 | --- | --- | --- | 0.305  | 1.235 | 7.17E-02 | 7.17E+00 |  |  |
| 7892967 | --- | --- | --- | -0.233 | 0.851 | 5.15E-01 | 5.15E+01 |  |  |
| 7892968 | --- | --- | --- | -0.128 | 0.915 | 5.71E-01 | 5.71E+01 |  |  |
| 7892969 | --- | --- | --- | -0.002 | 0.998 | 9.90E-01 | 9.90E+01 |  |  |
| 7892972 | --- | --- | --- | 0.294  | 1.226 | 3.04E-01 | 3.04E+01 |  |  |
| 7892973 | --- | --- | --- | 0.101  | 1.072 | 8.71E-01 | 8.71E+01 |  |  |
| 7892977 | --- | --- | --- | -0.061 | 0.958 | 6.05E-01 | 6.05E+01 |  |  |
| 7892978 | --- | --- | --- | -0.052 | 0.965 | 9.18E-01 | 9.18E+01 |  |  |
| 7892979 | --- | --- | --- | 0.003  | 1.002 | 9.87E-01 | 9.87E+01 |  |  |
| 7892981 | --- | --- | --- | 0.087  | 1.062 | 8.82E-01 | 8.82E+01 |  |  |
| 7892982 | --- | --- | --- | 0.125  | 1.090 | 9.18E-01 | 9.18E+01 |  |  |
| 7892983 | --- | --- | --- | -0.004 | 0.997 | 9.90E-01 | 9.90E+01 |  |  |
| 7892984 | --- | --- | --- | -0.194 | 0.874 | 6.08E-01 | 6.08E+01 |  |  |
| 7892985 | --- | --- | --- | 0.149  | 1.109 | 6.20E-01 | 6.20E+01 |  |  |
| 7892986 | --- | --- | --- | 0.055  | 1.039 | 6.83E-01 | 6.83E+01 |  |  |
| 7892987 | --- | --- | --- | 0.079  | 1.057 | 4.10E-01 | 4.10E+01 |  |  |
| 7892989 | --- | --- | --- | -0.074 | 0.950 | 8.27E-01 | 8.27E+01 |  |  |
| 7892990 | --- | --- | --- | 0.176  | 1.129 | 8.16E-01 | 8.16E+01 |  |  |
| 7892991 | --- | --- | --- | -0.005 | 0.997 | 9.85E-01 | 9.85E+01 |  |  |
| 7892992 | --- | --- | --- | 0.024  | 1.017 | 8.55E-01 | 8.55E+01 |  |  |
| 7892993 | --- | --- | --- | 0.028  | 1.020 | 8.84E-01 | 8.84E+01 |  |  |
| 7892996 | --- | --- | --- | 0.096  | 1.069 | 6.18E-01 | 6.18E+01 |  |  |
| 7892998 | --- | --- | --- | 0.089  | 1.064 | 8.45E-01 | 8.45E+01 |  |  |
| 7893000 | --- | --- | --- | 0.076  | 1.054 | 8.59E-01 | 8.59E+01 |  |  |
| 7893001 | --- | --- | --- | -0.091 | 0.939 | 7.09E-01 | 7.09E+01 |  |  |
| 7893002 | --- | --- | --- | -0.032 | 0.978 | 8.39E-01 | 8.39E+01 |  |  |
| 7893003 | --- | --- | --- | -0.096 | 0.935 | 6.78E-01 | 6.78E+01 |  |  |
| 7893004 | --- | --- | --- | 0.081  | 1.058 | 8.71E-01 | 8.71E+01 |  |  |
| 7893005 | --- | --- | --- | -0.081 | 0.946 | 9.14E-01 | 9.14E+01 |  |  |
| 7893007 | --- | --- | --- | -0.043 | 0.971 | 7.30E-01 | 7.30E+01 |  |  |
| 7893010 | --- | --- | --- | -0.037 | 0.975 | 8.93E-01 | 8.93E+01 |  |  |
| 7893012 | --- | --- | --- | 0.003  | 1.002 | 9.88E-01 | 9.88E+01 |  |  |
| 7893013 | --- | --- | --- | 0.111  | 1.080 | 5.46E-01 | 5.46E+01 |  |  |
| 7893014 | --- | --- | --- | 0.155  | 1.114 | 7.45E-01 | 7.45E+01 |  |  |
| 7893015 | --- | --- | --- | -0.042 | 0.971 | 8.33E-01 | 8.33E+01 |  |  |
| 7893017 | --- | --- | --- | 0.151  | 1.110 | 5.05E-01 | 5.05E+01 |  |  |
| 7893018 | --- | --- | --- | 0.069  | 1.049 | 9.38E-01 | 9.38E+01 |  |  |
| 7893019 | --- | --- | --- | -0.040 | 0.973 | 9.52E-01 | 9.52E+01 |  |  |
| 7893023 | --- | --- | --- | 0.025  | 1.018 | 9.49E-01 | 9.49E+01 |  |  |
| 7893025 | --- | --- | --- | 0.060  | 1.042 | 8.13E-01 | 8.13E+01 |  |  |
| 7893026 | --- | --- | --- | -0.068 | 0.954 | 4.25E-01 | 4.25E+01 |  |  |
| 7893027 | --- | --- | --- | 0.031  | 1.022 | 9.61E-01 | 9.61E+01 |  |  |
| 7893028 | --- | --- | --- | 0.152  | 1.111 | 7.48E-01 | 7.48E+01 |  |  |
| 7893029 | --- | --- | --- | -0.105 | 0.930 | 5.30E-01 | 5.30E+01 |  |  |
| 7893030 | --- | --- | --- | -0.156 | 0.897 | 5.96E-01 | 5.96E+01 |  |  |
| 7893031 | --- | --- | --- | -0.178 | 0.884 | 5.67E-01 | 5.67E+01 |  |  |
| 7893032 | --- | --- | --- | -0.170 | 0.889 | 2.96E-01 | 2.96E+01 |  |  |
| 7893033 | --- | --- | --- | -0.002 | 0.999 | 9.92E-01 | 9.92E+01 |  |  |
| 7893034 | --- | --- | --- | 0.088  | 1.063 | 7.83E-01 | 7.83E+01 |  |  |
| 7893035 | --- | --- | --- | 0.140  | 1.102 | 6.51E-01 | 6.51E+01 |  |  |
| 7893036 | --- | --- | --- | 0.004  | 1.003 | 9.91E-01 | 9.91E+01 |  |  |
| 7893037 | --- | --- | --- | -0.003 | 0.998 | 9.88E-01 | 9.88E+01 |  |  |
| 7893039 | --- | --- | --- | 0.005  | 1.003 | 9.86E-01 | 9.86E+01 |  |  |
| 7893040 | --- | --- | --- | 0.222  | 1.166 | 3.22E-01 | 3.22E+01 |  |  |
| 7893042 | --- | --- | --- | -0.010 | 0.993 | 9.62E-01 | 9.62E+01 |  |  |
| 7893043 | --- | --- | --- | -0.067 | 0.954 | 8.16E-01 | 8.16E+01 |  |  |
| 7893046 | --- | --- | --- | 0.306  | 1.236 | 1.76E-01 | 1.76E+01 |  |  |
| 7893047 | --- | --- | --- | 0.377  | 1.298 | 3.56E-01 | 3.56E+01 |  |  |
| 7893048 | --- | --- | --- | -0.006 | 0.996 | 9.86E-01 | 9.86E+01 |  |  |
| 7893050 | --- | --- | --- | -0.004 | 0.997 | 9.85E-01 | 9.85E+01 |  |  |
| 7893051 | --- | --- | --- | -0.005 | 0.997 | 9.95E-01 | 9.95E+01 |  |  |

|         |     |     |     |        |       |          |          |  |  |
|---------|-----|-----|-----|--------|-------|----------|----------|--|--|
| 7893052 | --- | --- | --- | 0.137  | 1.100 | 7.14E-01 | 7.14E+01 |  |  |
| 7893055 | --- | --- | --- | 0.450  | 1.366 | 1.52E-01 | 1.52E+01 |  |  |
| 7893056 | --- | --- | --- | -0.098 | 0.934 | 8.23E-01 | 8.23E+01 |  |  |
| 7893058 | --- | --- | --- | -0.058 | 0.961 | 7.30E-01 | 7.30E+01 |  |  |
| 7893059 | --- | --- | --- | -0.081 | 0.945 | 7.62E-01 | 7.62E+01 |  |  |
| 7893060 | --- | --- | --- | 0.362  | 1.286 | 3.64E-01 | 3.64E+01 |  |  |
| 7893061 | --- | --- | --- | 0.196  | 1.145 | 3.93E-01 | 3.93E+01 |  |  |
| 7893062 | --- | --- | --- | -0.113 | 0.925 | 8.48E-01 | 8.48E+01 |  |  |
| 7893063 | --- | --- | --- | 0.051  | 1.036 | 9.19E-01 | 9.19E+01 |  |  |
| 7893064 | --- | --- | --- | 0.002  | 1.002 | 9.98E-01 | 9.98E+01 |  |  |
| 7893065 | --- | --- | --- | 0.223  | 1.167 | 5.29E-01 | 5.29E+01 |  |  |
| 7893067 | --- | --- | --- | -0.166 | 0.891 | 4.72E-01 | 4.72E+01 |  |  |
| 7893068 | --- | --- | --- | -0.092 | 0.939 | 6.80E-01 | 6.80E+01 |  |  |
| 7893069 | --- | --- | --- | 0.044  | 1.031 | 8.39E-01 | 8.39E+01 |  |  |
| 7893070 | --- | --- | --- | -0.163 | 0.893 | 2.56E-01 | 2.56E+01 |  |  |
| 7893071 | --- | --- | --- | -0.141 | 0.907 | 5.78E-01 | 5.78E+01 |  |  |
| 7893072 | --- | --- | --- | 0.005  | 1.003 | 9.89E-01 | 9.89E+01 |  |  |
| 7893073 | --- | --- | --- | -0.069 | 0.954 | 7.45E-01 | 7.45E+01 |  |  |
| 7893074 | --- | --- | --- | 0.242  | 1.182 | 2.66E-01 | 2.66E+01 |  |  |
| 7893075 | --- | --- | --- | 0.039  | 1.028 | 9.43E-01 | 9.43E+01 |  |  |
| 7893077 | --- | --- | --- | 0.054  | 1.038 | 4.15E-01 | 4.15E+01 |  |  |
| 7893079 | --- | --- | --- | 0.042  | 1.030 | 8.43E-01 | 8.43E+01 |  |  |
| 7893081 | --- | --- | --- | -0.011 | 0.992 | 9.59E-01 | 9.59E+01 |  |  |
| 7893082 | --- | --- | --- | -0.048 | 0.967 | 9.33E-01 | 9.33E+01 |  |  |
| 7893084 | --- | --- | --- | -0.016 | 0.989 | 9.87E-01 | 9.87E+01 |  |  |
| 7893085 | --- | --- | --- | 0.041  | 1.029 | 8.17E-01 | 8.17E+01 |  |  |
| 7893086 | --- | --- | --- | -0.151 | 0.901 | 6.38E-01 | 6.38E+01 |  |  |
| 7893087 | --- | --- | --- | -0.108 | 0.928 | 7.34E-01 | 7.34E+01 |  |  |
| 7893089 | --- | --- | --- | -0.120 | 0.920 | 6.93E-01 | 6.93E+01 |  |  |
| 7893090 | --- | --- | --- | -0.024 | 0.984 | 9.17E-01 | 9.17E+01 |  |  |
| 7893091 | --- | --- | --- | -0.035 | 0.976 | 7.94E-01 | 7.94E+01 |  |  |
| 7893094 | --- | --- | --- | -0.054 | 0.963 | 7.15E-01 | 7.15E+01 |  |  |
| 7893096 | --- | --- | --- | 0.056  | 1.039 | 6.87E-01 | 6.87E+01 |  |  |
| 7893097 | --- | --- | --- | 0.079  | 1.056 | 8.17E-01 | 8.17E+01 |  |  |
| 7893098 | --- | --- | --- | 0.005  | 1.003 | 9.89E-01 | 9.89E+01 |  |  |
| 7893099 | --- | --- | --- | -0.194 | 0.874 | 6.09E-01 | 6.09E+01 |  |  |
| 7893100 | --- | --- | --- | -0.134 | 0.912 | 3.76E-01 | 3.76E+01 |  |  |
| 7893101 | --- | --- | --- | 0.042  | 1.029 | 5.79E-01 | 5.79E+01 |  |  |
| 7893102 | --- | --- | --- | 0.323  | 1.251 | 6.40E-01 | 6.40E+01 |  |  |
| 7893103 | --- | --- | --- | 0.053  | 1.037 | 8.09E-01 | 8.09E+01 |  |  |
| 7893104 | --- | --- | --- | 0.288  | 1.221 | 5.49E-01 | 5.49E+01 |  |  |
| 7893105 | --- | --- | --- | 0.063  | 1.045 | 6.34E-01 | 6.34E+01 |  |  |
| 7893106 | --- | --- | --- | -0.083 | 0.944 | 6.80E-01 | 6.80E+01 |  |  |
| 7893108 | --- | --- | --- | -0.230 | 0.853 | 8.29E-01 | 8.29E+01 |  |  |
| 7893111 | --- | --- | --- | 0.252  | 1.191 | 3.80E-01 | 3.80E+01 |  |  |
| 7893112 | --- | --- | --- | 0.194  | 1.144 | 2.83E-01 | 2.83E+01 |  |  |
| 7893113 | --- | --- | --- | 0.189  | 1.140 | 9.17E-02 | 9.17E+00 |  |  |
| 7893114 | --- | --- | --- | 0.118  | 1.085 | 5.82E-01 | 5.82E+01 |  |  |
| 7893115 | --- | --- | --- | -0.085 | 0.943 | 8.88E-01 | 8.88E+01 |  |  |
| 7893116 | --- | --- | --- | 0.031  | 1.022 | 8.62E-01 | 8.62E+01 |  |  |
| 7893118 | --- | --- | --- | -0.018 | 0.988 | 9.76E-01 | 9.76E+01 |  |  |
| 7893119 | --- | --- | --- | -0.025 | 0.983 | 9.54E-01 | 9.54E+01 |  |  |
| 7893120 | --- | --- | --- | 0.176  | 1.130 | 3.29E-01 | 3.29E+01 |  |  |
| 7893121 | --- | --- | --- | -0.052 | 0.964 | 7.83E-01 | 7.83E+01 |  |  |
| 7893122 | --- | --- | --- | -0.145 | 0.904 | 2.45E-01 | 2.45E+01 |  |  |
| 7893123 | --- | --- | --- | 0.051  | 1.036 | 8.13E-01 | 8.13E+01 |  |  |
| 7893125 | --- | --- | --- | -0.126 | 0.917 | 2.26E-01 | 2.26E+01 |  |  |
| 7893128 | --- | --- | --- | 0.130  | 1.095 | 7.32E-01 | 7.32E+01 |  |  |
| 7893129 | --- | --- | --- | 0.057  | 1.040 | 8.74E-01 | 8.74E+01 |  |  |
| 7893130 | --- | --- | --- | 0.045  | 1.032 | 8.34E-01 | 8.34E+01 |  |  |
| 7893131 | --- | --- | --- | 0.124  | 1.090 | 5.49E-01 | 5.49E+01 |  |  |
| 7893132 | --- | --- | --- | 0.033  | 1.023 | 9.53E-01 | 9.53E+01 |  |  |
| 7893133 | --- | --- | --- | 0.013  | 1.009 | 9.64E-01 | 9.64E+01 |  |  |
| 7893134 | --- | --- | --- | -0.001 | 0.999 | 9.99E-01 | 9.99E+01 |  |  |
| 7893136 | --- | --- | --- | 0.061  | 1.043 | 9.00E-01 | 9.00E+01 |  |  |
| 7893137 | --- | --- | --- | 0.068  | 1.048 | 8.41E-01 | 8.41E+01 |  |  |
| 7893138 | --- | --- | --- | -0.045 | 0.969 | 8.10E-01 | 8.10E+01 |  |  |
| 7893139 | --- | --- | --- | 0.086  | 1.061 | 4.49E-01 | 4.49E+01 |  |  |
| 7893140 | --- | --- | --- | 0.019  | 1.013 | 9.07E-01 | 9.07E+01 |  |  |
| 7893141 | --- | --- | --- | 0.102  | 1.074 | 7.78E-01 | 7.78E+01 |  |  |
| 7893142 | --- | --- | --- | -0.085 | 0.943 | 8.27E-01 | 8.27E+01 |  |  |
| 7893143 | --- | --- | --- | 0.078  | 1.056 | 8.09E-01 | 8.09E+01 |  |  |
| 7893145 | --- | --- | --- | -0.107 | 0.929 | 8.41E-01 | 8.41E+01 |  |  |
| 7893146 | --- | --- | --- | 0.322  | 1.250 | 2.80E-01 | 2.80E+01 |  |  |
| 7893147 | --- | --- | --- | 0.040  | 1.028 | 6.43E-01 | 6.43E+01 |  |  |
| 7893148 | --- | --- | --- | 0.068  | 1.048 | 6.40E-01 | 6.40E+01 |  |  |
| 7893150 | --- | --- | --- | 0.093  | 1.066 | 8.66E-01 | 8.66E+01 |  |  |

|         |     |     |     |        |       |          |          |  |  |
|---------|-----|-----|-----|--------|-------|----------|----------|--|--|
| 7893151 | --- | --- | --- | 0.000  | 1.000 | 1.00E+00 | 1.00E+02 |  |  |
| 7893152 | --- | --- | --- | 0.025  | 1.017 | 8.40E-01 | 8.40E+01 |  |  |
| 7893153 | --- | --- | --- | -0.103 | 0.931 | 5.64E-01 | 5.64E+01 |  |  |
| 7893154 | --- | --- | --- | 0.055  | 1.039 | 9.20E-01 | 9.20E+01 |  |  |
| 7893155 | --- | --- | --- | 0.029  | 1.020 | 9.61E-01 | 9.61E+01 |  |  |
| 7893156 | --- | --- | --- | 0.064  | 1.045 | 7.56E-01 | 7.56E+01 |  |  |
| 7893158 | --- | --- | --- | 0.125  | 1.091 | 5.10E-01 | 5.10E+01 |  |  |
| 7893159 | --- | --- | --- | -0.172 | 0.887 | 6.00E-01 | 6.00E+01 |  |  |
| 7893160 | --- | --- | --- | -0.047 | 0.968 | 8.41E-01 | 8.41E+01 |  |  |
| 7893161 | --- | --- | --- | 0.070  | 1.050 | 9.49E-01 | 9.49E+01 |  |  |
| 7893164 | --- | --- | --- | -0.040 | 0.973 | 8.95E-01 | 8.95E+01 |  |  |
| 7893165 | --- | --- | --- | 0.079  | 1.056 | 8.57E-01 | 8.57E+01 |  |  |
| 7893166 | --- | --- | --- | -0.004 | 0.997 | 9.96E-01 | 9.96E+01 |  |  |
| 7893167 | --- | --- | --- | -0.164 | 0.892 | 5.80E-01 | 5.80E+01 |  |  |
| 7893168 | --- | --- | --- | 0.379  | 1.301 | 9.43E-02 | 9.43E+00 |  |  |
| 7893169 | --- | --- | --- | -0.017 | 0.988 | 9.77E-01 | 9.77E+01 |  |  |
| 7893171 | --- | --- | --- | 0.024  | 1.016 | 9.76E-01 | 9.76E+01 |  |  |
| 7893172 | --- | --- | --- | -0.138 | 0.909 | 6.67E-01 | 6.67E+01 |  |  |
| 7893173 | --- | --- | --- | -0.063 | 0.957 | 7.68E-01 | 7.68E+01 |  |  |
| 7893175 | --- | --- | --- | -0.317 | 0.803 | 4.54E-01 | 4.54E+01 |  |  |
| 7893177 | --- | --- | --- | -0.028 | 0.981 | 9.64E-01 | 9.64E+01 |  |  |
| 7893179 | --- | --- | --- | -0.010 | 0.993 | 9.88E-01 | 9.88E+01 |  |  |
| 7893180 | --- | --- | --- | 0.030  | 1.021 | 9.57E-01 | 9.57E+01 |  |  |
| 7893181 | --- | --- | --- | -0.043 | 0.971 | 8.52E-01 | 8.52E+01 |  |  |
| 7893182 | --- | --- | --- | -0.028 | 0.981 | 9.37E-01 | 9.37E+01 |  |  |
| 7893184 | --- | --- | --- | 0.022  | 1.016 | 8.85E-01 | 8.85E+01 |  |  |
| 7893185 | --- | --- | --- | -0.124 | 0.918 | 8.37E-01 | 8.37E+01 |  |  |
| 7893187 | --- | --- | --- | 0.157  | 1.115 | 5.99E-01 | 5.99E+01 |  |  |
| 7893188 | --- | --- | --- | -0.232 | 0.851 | 3.27E-01 | 3.27E+01 |  |  |
| 7893189 | --- | --- | --- | 0.033  | 1.023 | 6.16E-01 | 6.16E+01 |  |  |
| 7893190 | --- | --- | --- | -0.225 | 0.856 | 4.27E-01 | 4.27E+01 |  |  |
| 7893191 | --- | --- | --- | -0.062 | 0.958 | 6.34E-01 | 6.34E+01 |  |  |
| 7893194 | --- | --- | --- | 0.035  | 1.024 | 7.72E-01 | 7.72E+01 |  |  |
| 7893196 | --- | --- | --- | 0.025  | 1.017 | 9.11E-01 | 9.11E+01 |  |  |
| 7893201 | --- | --- | --- | 0.008  | 1.006 | 9.85E-01 | 9.85E+01 |  |  |
| 7893202 | --- | --- | --- | -0.205 | 0.867 | 4.63E-01 | 4.63E+01 |  |  |
| 7893205 | --- | --- | --- | -0.129 | 0.915 | 3.46E-01 | 3.46E+01 |  |  |
| 7893206 | --- | --- | --- | 0.067  | 1.048 | 8.32E-01 | 8.32E+01 |  |  |
| 7893207 | --- | --- | --- | -0.020 | 0.986 | 9.57E-01 | 9.57E+01 |  |  |
| 7893208 | --- | --- | --- | 0.002  | 1.002 | 9.89E-01 | 9.89E+01 |  |  |
| 7893209 | --- | --- | --- | -0.182 | 0.881 | 5.43E-01 | 5.43E+01 |  |  |
| 7893210 | --- | --- | --- | -0.045 | 0.969 | 8.82E-01 | 8.82E+01 |  |  |
| 7893212 | --- | --- | --- | 0.057  | 1.040 | 8.26E-01 | 8.26E+01 |  |  |
| 7893213 | --- | --- | --- | 0.179  | 1.132 | 8.10E-01 | 8.10E+01 |  |  |
| 7893214 | --- | --- | --- | -0.384 | 0.766 | 4.01E-01 | 4.01E+01 |  |  |
| 7893215 | --- | --- | --- | 0.107  | 1.077 | 9.00E-01 | 9.00E+01 |  |  |
| 7893216 | --- | --- | --- | 0.055  | 1.039 | 9.19E-01 | 9.19E+01 |  |  |
| 7893217 | --- | --- | --- | 0.060  | 1.043 | 8.20E-01 | 8.20E+01 |  |  |
| 7893218 | --- | --- | --- | 0.012  | 1.008 | 9.17E-01 | 9.17E+01 |  |  |
| 7893219 | --- | --- | --- | -0.084 | 0.943 | 8.69E-01 | 8.69E+01 |  |  |
| 7893220 | --- | --- | --- | 0.072  | 1.051 | 6.51E-01 | 6.51E+01 |  |  |
| 7893222 | --- | --- | --- | 0.100  | 1.072 | 8.80E-01 | 8.80E+01 |  |  |
| 7893225 | --- | --- | --- | 0.158  | 1.116 | 5.40E-01 | 5.40E+01 |  |  |
| 7893226 | --- | --- | --- | 0.145  | 1.106 | 5.47E-01 | 5.47E+01 |  |  |
| 7893227 | --- | --- | --- | -0.105 | 0.930 | 7.27E-01 | 7.27E+01 |  |  |
| 7893229 | --- | --- | --- | 0.032  | 1.023 | 9.27E-01 | 9.27E+01 |  |  |
| 7893230 | --- | --- | --- | -0.274 | 0.827 | 8.25E-01 | 8.25E+01 |  |  |
| 7893231 | --- | --- | --- | 0.049  | 1.034 | 7.71E-01 | 7.71E+01 |  |  |
| 7893234 | --- | --- | --- | -0.191 | 0.876 | 3.54E-01 | 3.54E+01 |  |  |
| 7893235 | --- | --- | --- | -0.068 | 0.954 | 7.68E-01 | 7.68E+01 |  |  |
| 7893236 | --- | --- | --- | -0.019 | 0.987 | 9.38E-01 | 9.38E+01 |  |  |
| 7893237 | --- | --- | --- | 0.030  | 1.021 | 8.04E-01 | 8.04E+01 |  |  |
| 7893238 | --- | --- | --- | -0.043 | 0.971 | 9.06E-01 | 9.06E+01 |  |  |
| 7893239 | --- | --- | --- | 0.120  | 1.087 | 7.51E-01 | 7.51E+01 |  |  |
| 7893240 | --- | --- | --- | -0.057 | 0.961 | 8.97E-01 | 8.97E+01 |  |  |
| 7893241 | --- | --- | --- | -0.029 | 0.980 | 9.56E-01 | 9.56E+01 |  |  |
| 7893242 | --- | --- | --- | 0.028  | 1.019 | 8.27E-01 | 8.27E+01 |  |  |
| 7893243 | --- | --- | --- | 0.150  | 1.109 | 7.24E-01 | 7.24E+01 |  |  |
| 7893244 | --- | --- | --- | -0.028 | 0.981 | 8.34E-01 | 8.34E+01 |  |  |
| 7893245 | --- | --- | --- | 0.087  | 1.062 | 7.93E-01 | 7.93E+01 |  |  |
| 7893246 | --- | --- | --- | 0.013  | 1.009 | 9.84E-01 | 9.84E+01 |  |  |
| 7893247 | --- | --- | --- | 0.035  | 1.024 | 8.41E-01 | 8.41E+01 |  |  |
| 7893248 | --- | --- | --- | 0.131  | 1.095 | 5.24E-01 | 5.24E+01 |  |  |
| 7893249 | --- | --- | --- | 0.039  | 1.027 | 8.78E-01 | 8.78E+01 |  |  |
| 7893251 | --- | --- | --- | 0.230  | 1.173 | 3.57E-01 | 3.57E+01 |  |  |
| 7893253 | --- | --- | --- | -0.021 | 0.986 | 9.73E-01 | 9.73E+01 |  |  |
| 7893255 | --- | --- | --- | -0.053 | 0.964 | 8.37E-01 | 8.37E+01 |  |  |

|         |     |     |     |        |       |          |          |  |  |
|---------|-----|-----|-----|--------|-------|----------|----------|--|--|
| 7893256 | --- | --- | --- | 0.455  | 1.370 | 2.41E-01 | 2.41E+01 |  |  |
| 7893257 | --- | --- | --- | -0.082 | 0.945 | 8.18E-01 | 8.18E+01 |  |  |
| 7893258 | --- | --- | --- | 0.045  | 1.032 | 9.16E-01 | 9.16E+01 |  |  |
| 7893259 | --- | --- | --- | -0.001 | 1.000 | 9.98E-01 | 9.98E+01 |  |  |
| 7893261 | --- | --- | --- | -0.053 | 0.964 | 8.06E-01 | 8.06E+01 |  |  |
| 7893262 | --- | --- | --- | -0.043 | 0.971 | 8.05E-01 | 8.05E+01 |  |  |
| 7893263 | --- | --- | --- | -0.013 | 0.991 | 9.81E-01 | 9.81E+01 |  |  |
| 7893264 | --- | --- | --- | -0.012 | 0.992 | 9.53E-01 | 9.53E+01 |  |  |
| 7893265 | --- | --- | --- | -0.199 | 0.871 | 7.89E-01 | 7.89E+01 |  |  |
| 7893266 | --- | --- | --- | -0.002 | 0.999 | 9.91E-01 | 9.91E+01 |  |  |
| 7893268 | --- | --- | --- | 0.090  | 1.064 | 7.95E-01 | 7.95E+01 |  |  |
| 7893269 | --- | --- | --- | -0.008 | 0.994 | 9.86E-01 | 9.86E+01 |  |  |
| 7893270 | --- | --- | --- | 0.047  | 1.033 | 7.60E-01 | 7.60E+01 |  |  |
| 7893271 | --- | --- | --- | -0.214 | 0.862 | 1.13E-01 | 1.13E+01 |  |  |
| 7893272 | --- | --- | --- | 0.077  | 1.055 | 6.13E-01 | 6.13E+01 |  |  |
| 7893273 | --- | --- | --- | 0.123  | 1.089 | 6.10E-01 | 6.10E+01 |  |  |
| 7893278 | --- | --- | --- | -0.012 | 0.992 | 9.85E-01 | 9.85E+01 |  |  |
| 7893279 | --- | --- | --- | -0.019 | 0.987 | 9.77E-01 | 9.77E+01 |  |  |
| 7893281 | --- | --- | --- | 0.085  | 1.061 | 3.42E-01 | 3.42E+01 |  |  |
| 7893283 | --- | --- | --- | 0.010  | 1.007 | 9.53E-01 | 9.53E+01 |  |  |
| 7893285 | --- | --- | --- | 0.082  | 1.058 | 7.51E-01 | 7.51E+01 |  |  |
| 7893286 | --- | --- | --- | 0.045  | 1.031 | 9.27E-01 | 9.27E+01 |  |  |
| 7893287 | --- | --- | --- | -0.110 | 0.926 | 8.16E-01 | 8.16E+01 |  |  |
| 7893288 | --- | --- | --- | -0.056 | 0.962 | 8.30E-01 | 8.30E+01 |  |  |
| 7893289 | --- | --- | --- | 0.064  | 1.045 | 5.74E-01 | 5.74E+01 |  |  |
| 7893290 | --- | --- | --- | -0.096 | 0.935 | 8.33E-01 | 8.33E+01 |  |  |
| 7893291 | --- | --- | --- | -0.155 | 0.898 | 7.39E-01 | 7.39E+01 |  |  |
| 7893294 | --- | --- | --- | -0.024 | 0.984 | 9.37E-01 | 9.37E+01 |  |  |
| 7893297 | --- | --- | --- | 0.192  | 1.142 | 2.20E-01 | 2.20E+01 |  |  |
| 7893298 | --- | --- | --- | 0.012  | 1.008 | 9.68E-01 | 9.68E+01 |  |  |
| 7893299 | --- | --- | --- | 0.152  | 1.111 | 8.05E-01 | 8.05E+01 |  |  |
| 7893300 | --- | --- | --- | -0.055 | 0.963 | 8.78E-01 | 8.78E+01 |  |  |
| 7893302 | --- | --- | --- | 0.123  | 1.089 | 7.29E-01 | 7.29E+01 |  |  |
| 7893304 | --- | --- | --- | -0.036 | 0.975 | 9.10E-01 | 9.10E+01 |  |  |
| 7893305 | --- | --- | --- | -0.028 | 0.981 | 9.61E-01 | 9.61E+01 |  |  |
| 7893306 | --- | --- | --- | 0.023  | 1.016 | 9.66E-01 | 9.66E+01 |  |  |
| 7893308 | --- | --- | --- | 0.053  | 1.037 | 9.55E-01 | 9.55E+01 |  |  |
| 7893309 | --- | --- | --- | 0.112  | 1.081 | 7.66E-01 | 7.66E+01 |  |  |
| 7893311 | --- | --- | --- | 0.028  | 1.020 | 9.30E-01 | 9.30E+01 |  |  |
| 7893313 | --- | --- | --- | 0.012  | 1.008 | 9.64E-01 | 9.64E+01 |  |  |
| 7893314 | --- | --- | --- | 0.111  | 1.080 | 6.39E-01 | 6.39E+01 |  |  |
| 7893316 | --- | --- | --- | -0.028 | 0.981 | 8.53E-01 | 8.53E+01 |  |  |
| 7893318 | --- | --- | --- | -0.073 | 0.951 | 9.23E-01 | 9.23E+01 |  |  |
| 7893319 | --- | --- | --- | 0.172  | 1.127 | 4.25E-01 | 4.25E+01 |  |  |
| 7893320 | --- | --- | --- | 0.331  | 1.258 | 4.84E-01 | 4.84E+01 |  |  |
| 7893321 | --- | --- | --- | 0.070  | 1.050 | 4.88E-01 | 4.88E+01 |  |  |
| 7893322 | --- | --- | --- | 0.345  | 1.271 | 6.33E-01 | 6.33E+01 |  |  |
| 7893325 | --- | --- | --- | 0.027  | 1.019 | 9.36E-01 | 9.36E+01 |  |  |
| 7893329 | --- | --- | --- | -0.079 | 0.947 | 6.82E-01 | 6.82E+01 |  |  |
| 7893331 | --- | --- | --- | 0.050  | 1.036 | 9.47E-01 | 9.47E+01 |  |  |
| 7893332 | --- | --- | --- | 0.020  | 1.014 | 9.37E-01 | 9.37E+01 |  |  |
| 7893333 | --- | --- | --- | 0.051  | 1.036 | 9.35E-01 | 9.35E+01 |  |  |
| 7893334 | --- | --- | --- | -0.030 | 0.979 | 9.55E-01 | 9.55E+01 |  |  |
| 7893335 | --- | --- | --- | 0.072  | 1.051 | 8.08E-01 | 8.08E+01 |  |  |
| 7893336 | --- | --- | --- | 0.049  | 1.034 | 8.37E-01 | 8.37E+01 |  |  |
| 7893337 | --- | --- | --- | -0.007 | 0.995 | 9.78E-01 | 9.78E+01 |  |  |
| 7893338 | --- | --- | --- | 0.057  | 1.040 | 6.66E-01 | 6.66E+01 |  |  |
| 7893339 | --- | --- | --- | -0.065 | 0.956 | 8.33E-01 | 8.33E+01 |  |  |
| 7893340 | --- | --- | --- | -0.009 | 0.994 | 9.77E-01 | 9.77E+01 |  |  |
| 7893341 | --- | --- | --- | 0.065  | 1.046 | 8.06E-01 | 8.06E+01 |  |  |
| 7893343 | --- | --- | --- | -0.179 | 0.883 | 4.26E-01 | 4.26E+01 |  |  |
| 7893344 | --- | --- | --- | -0.001 | 1.000 | 9.99E-01 | 9.99E+01 |  |  |
| 7893345 | --- | --- | --- | 0.263  | 1.200 | 7.47E-02 | 7.47E+00 |  |  |
| 7893346 | --- | --- | --- | 0.034  | 1.024 | 9.49E-01 | 9.49E+01 |  |  |
| 7893348 | --- | --- | --- | -0.047 | 0.968 | 7.73E-01 | 7.73E+01 |  |  |
| 7893349 | --- | --- | --- | -0.169 | 0.889 | 6.74E-01 | 6.74E+01 |  |  |
| 7893350 | --- | --- | --- | -0.340 | 0.790 | 2.33E-01 | 2.33E+01 |  |  |
| 7893351 | --- | --- | --- | 0.004  | 1.002 | 9.89E-01 | 9.89E+01 |  |  |
| 7893352 | --- | --- | --- | 0.026  | 1.018 | 9.74E-01 | 9.74E+01 |  |  |
| 7893353 | --- | --- | --- | -0.044 | 0.970 | 8.45E-01 | 8.45E+01 |  |  |
| 7893354 | --- | --- | --- | -0.094 | 0.937 | 5.22E-01 | 5.22E+01 |  |  |
| 7893355 | --- | --- | --- | 0.486  | 1.401 | 3.39E-01 | 3.39E+01 |  |  |
| 7893356 | --- | --- | --- | -0.044 | 0.970 | 8.62E-01 | 8.62E+01 |  |  |
| 7893357 | --- | --- | --- | -0.086 | 0.942 | 4.44E-01 | 4.44E+01 |  |  |
| 7893358 | --- | --- | --- | 0.006  | 1.004 | 9.97E-01 | 9.97E+01 |  |  |
| 7893359 | --- | --- | --- | -0.192 | 0.875 | 7.81E-01 | 7.81E+01 |  |  |
| 7893360 | --- | --- | --- | -0.237 | 0.848 | 7.27E-01 | 7.27E+01 |  |  |

|         |     |     |     |        |       |          |          |  |  |
|---------|-----|-----|-----|--------|-------|----------|----------|--|--|
| 7893361 | --- | --- | --- | -0.095 | 0.936 | 6.10E-01 | 6.10E+01 |  |  |
| 7893362 | --- | --- | --- | 0.183  | 1.135 | 1.45E-01 | 1.45E+01 |  |  |
| 7893363 | --- | --- | --- | -0.253 | 0.839 | 2.09E-01 | 2.09E+01 |  |  |
| 7893364 | --- | --- | --- | -0.077 | 0.948 | 8.06E-01 | 8.06E+01 |  |  |
| 7893365 | --- | --- | --- | 0.132  | 1.096 | 8.33E-01 | 8.33E+01 |  |  |
| 7893367 | --- | --- | --- | -0.024 | 0.984 | 9.52E-01 | 9.52E+01 |  |  |
| 7893369 | --- | --- | --- | 0.004  | 1.003 | 9.93E-01 | 9.93E+01 |  |  |
| 7893371 | --- | --- | --- | 0.020  | 1.014 | 8.87E-01 | 8.87E+01 |  |  |
| 7893372 | --- | --- | --- | -0.105 | 0.930 | 9.31E-01 | 9.31E+01 |  |  |
| 7893373 | --- | --- | --- | -0.071 | 0.952 | 7.94E-01 | 7.94E+01 |  |  |
| 7893374 | --- | --- | --- | 0.068  | 1.048 | 4.99E-01 | 4.99E+01 |  |  |
| 7893380 | --- | --- | --- | 0.271  | 1.207 | 5.06E-01 | 5.06E+01 |  |  |
| 7893382 | --- | --- | --- | -0.012 | 0.992 | 9.27E-01 | 9.27E+01 |  |  |
| 7893383 | --- | --- | --- | 0.131  | 1.095 | 4.13E-01 | 4.13E+01 |  |  |
| 7893384 | --- | --- | --- | 0.004  | 1.003 | 9.91E-01 | 9.91E+01 |  |  |
| 7893385 | --- | --- | --- | -0.071 | 0.952 | 6.91E-01 | 6.91E+01 |  |  |
| 7893386 | --- | --- | --- | -0.011 | 0.992 | 9.56E-01 | 9.56E+01 |  |  |
| 7893388 | --- | --- | --- | 0.165  | 1.121 | 8.08E-01 | 8.08E+01 |  |  |
| 7893390 | --- | --- | --- | -0.010 | 0.993 | 9.64E-01 | 9.64E+01 |  |  |
| 7893391 | --- | --- | --- | 0.008  | 1.006 | 9.74E-01 | 9.74E+01 |  |  |
| 7893392 | --- | --- | --- | -0.100 | 0.933 | 7.01E-01 | 7.01E+01 |  |  |
| 7893393 | --- | --- | --- | -0.189 | 0.877 | 1.87E-01 | 1.87E+01 |  |  |
| 7893394 | --- | --- | --- | -0.051 | 0.965 | 8.09E-01 | 8.09E+01 |  |  |
| 7893395 | --- | --- | --- | 0.116  | 1.084 | 6.78E-01 | 6.78E+01 |  |  |
| 7893396 | --- | --- | --- | 0.068  | 1.048 | 8.81E-01 | 8.81E+01 |  |  |
| 7893397 | --- | --- | --- | -0.210 | 0.865 | 6.42E-01 | 6.42E+01 |  |  |
| 7893399 | --- | --- | --- | -0.076 | 0.949 | 8.66E-01 | 8.66E+01 |  |  |
| 7893402 | --- | --- | --- | 0.058  | 1.041 | 8.22E-01 | 8.22E+01 |  |  |
| 7893403 | --- | --- | --- | -0.161 | 0.894 | 6.64E-01 | 6.64E+01 |  |  |
| 7893405 | --- | --- | --- | 0.031  | 1.022 | 9.60E-01 | 9.60E+01 |  |  |
| 7893407 | --- | --- | --- | -0.054 | 0.963 | 8.33E-01 | 8.33E+01 |  |  |
| 7893408 | --- | --- | --- | 0.049  | 1.034 | 9.23E-01 | 9.23E+01 |  |  |
| 7893410 | --- | --- | --- | -0.030 | 0.980 | 8.61E-01 | 8.61E+01 |  |  |
| 7893412 | --- | --- | --- | -0.005 | 0.997 | 9.95E-01 | 9.95E+01 |  |  |
| 7893413 | --- | --- | --- | -0.019 | 0.987 | 9.35E-01 | 9.35E+01 |  |  |
| 7893414 | --- | --- | --- | 0.020  | 1.014 | 8.58E-01 | 8.58E+01 |  |  |
| 7893415 | --- | --- | --- | -0.137 | 0.909 | 8.34E-01 | 8.34E+01 |  |  |
| 7893416 | --- | --- | --- | 0.136  | 1.099 | 8.47E-01 | 8.47E+01 |  |  |
| 7893418 | --- | --- | --- | 0.038  | 1.026 | 8.49E-01 | 8.49E+01 |  |  |
| 7893419 | --- | --- | --- | -0.014 | 0.990 | 9.62E-01 | 9.62E+01 |  |  |
| 7893420 | --- | --- | --- | -0.035 | 0.976 | 7.89E-01 | 7.89E+01 |  |  |
| 7893421 | --- | --- | --- | 0.110  | 1.079 | 7.95E-01 | 7.95E+01 |  |  |
| 7893422 | --- | --- | --- | -0.135 | 0.911 | 6.38E-01 | 6.38E+01 |  |  |
| 7893424 | --- | --- | --- | 0.057  | 1.041 | 7.45E-01 | 7.45E+01 |  |  |
| 7893427 | --- | --- | --- | -0.203 | 0.869 | 2.69E-01 | 2.69E+01 |  |  |
| 7893428 | --- | --- | --- | -0.060 | 0.959 | 7.03E-01 | 7.03E+01 |  |  |
| 7893432 | --- | --- | --- | 0.431  | 1.348 | 2.00E-01 | 2.00E+01 |  |  |
| 7893435 | --- | --- | --- | 0.008  | 1.006 | 9.70E-01 | 9.70E+01 |  |  |
| 7893436 | --- | --- | --- | -0.019 | 0.987 | 9.73E-01 | 9.73E+01 |  |  |
| 7893437 | --- | --- | --- | 0.153  | 1.112 | 7.85E-01 | 7.85E+01 |  |  |
| 7893438 | --- | --- | --- | -0.024 | 0.983 | 9.22E-01 | 9.22E+01 |  |  |
| 7893439 | --- | --- | --- | -0.023 | 0.984 | 9.14E-01 | 9.14E+01 |  |  |
| 7893441 | --- | --- | --- | -0.062 | 0.958 | 9.06E-01 | 9.06E+01 |  |  |
| 7893442 | --- | --- | --- | 0.201  | 1.149 | 5.34E-01 | 5.34E+01 |  |  |
| 7893443 | --- | --- | --- | 0.027  | 1.019 | 9.53E-01 | 9.53E+01 |  |  |
| 7893444 | --- | --- | --- | 0.016  | 1.011 | 9.76E-01 | 9.76E+01 |  |  |
| 7893445 | --- | --- | --- | 0.003  | 1.002 | 9.99E-01 | 9.99E+01 |  |  |
| 7893447 | --- | --- | --- | -0.098 | 0.934 | 6.69E-01 | 6.69E+01 |  |  |
| 7893448 | --- | --- | --- | 0.030  | 1.021 | 8.83E-01 | 8.83E+01 |  |  |
| 7893449 | --- | --- | --- | -0.031 | 0.979 | 7.73E-01 | 7.73E+01 |  |  |
| 7893454 | --- | --- | --- | 0.024  | 1.017 | 9.19E-01 | 9.19E+01 |  |  |
| 7893455 | --- | --- | --- | -0.024 | 0.984 | 9.24E-01 | 9.24E+01 |  |  |
| 7893458 | --- | --- | --- | -0.107 | 0.929 | 5.78E-01 | 5.78E+01 |  |  |
| 7893459 | --- | --- | --- | -0.151 | 0.900 | 8.35E-01 | 8.35E+01 |  |  |
| 7893460 | --- | --- | --- | -0.025 | 0.983 | 8.47E-01 | 8.47E+01 |  |  |
| 7893461 | --- | --- | --- | -0.119 | 0.921 | 7.09E-01 | 7.09E+01 |  |  |
| 7893462 | --- | --- | --- | -0.075 | 0.949 | 8.47E-01 | 8.47E+01 |  |  |
| 7893463 | --- | --- | --- | 0.062  | 1.044 | 7.50E-01 | 7.50E+01 |  |  |
| 7893464 | --- | --- | --- | 0.036  | 1.025 | 8.13E-01 | 8.13E+01 |  |  |
| 7893466 | --- | --- | --- | 0.053  | 1.038 | 5.68E-01 | 5.68E+01 |  |  |
| 7893467 | --- | --- | --- | 0.043  | 1.030 | 8.23E-01 | 8.23E+01 |  |  |
| 7893468 | --- | --- | --- | 0.050  | 1.035 | 9.13E-01 | 9.13E+01 |  |  |
| 7893469 | --- | --- | --- | 0.034  | 1.024 | 8.06E-01 | 8.06E+01 |  |  |
| 7893470 | --- | --- | --- | 0.094  | 1.067 | 6.80E-01 | 6.80E+01 |  |  |
| 7893471 | --- | --- | --- | -0.023 | 0.984 | 9.55E-01 | 9.55E+01 |  |  |
| 7893472 | --- | --- | --- | -0.079 | 0.947 | 8.52E-01 | 8.52E+01 |  |  |
| 7893473 | --- | --- | --- | -0.056 | 0.962 | 9.15E-01 | 9.15E+01 |  |  |

|         |     |     |     |        |       |          |          |  |  |
|---------|-----|-----|-----|--------|-------|----------|----------|--|--|
| 7893474 | --- | --- | --- | -0.091 | 0.939 | 8.91E-01 | 8.91E+01 |  |  |
| 7893475 | --- | --- | --- | 0.095  | 1.068 | 7.38E-01 | 7.38E+01 |  |  |
| 7893476 | --- | --- | --- | -0.175 | 0.886 | 3.04E-01 | 3.04E+01 |  |  |
| 7893477 | --- | --- | --- | 0.297  | 1.229 | 4.68E-01 | 4.68E+01 |  |  |
| 7893478 | --- | --- | --- | 0.239  | 1.180 | 1.61E-01 | 1.61E+01 |  |  |
| 7893480 | --- | --- | --- | -0.124 | 0.917 | 5.89E-01 | 5.89E+01 |  |  |
| 7893481 | --- | --- | --- | -0.041 | 0.972 | 9.26E-01 | 9.26E+01 |  |  |
| 7893482 | --- | --- | --- | 0.300  | 1.232 | 5.77E-01 | 5.77E+01 |  |  |
| 7893483 | --- | --- | --- | 0.172  | 1.127 | 1.17E-01 | 1.17E+01 |  |  |
| 7893484 | --- | --- | --- | -0.084 | 0.943 | 9.37E-01 | 9.37E+01 |  |  |
| 7893485 | --- | --- | --- | 0.005  | 1.003 | 9.91E-01 | 9.91E+01 |  |  |
| 7893486 | --- | --- | --- | -0.025 | 0.983 | 9.16E-01 | 9.16E+01 |  |  |
| 7893487 | --- | --- | --- | 0.093  | 1.066 | 8.27E-01 | 8.27E+01 |  |  |
| 7893488 | --- | --- | --- | 0.243  | 1.184 | 3.95E-01 | 3.95E+01 |  |  |
| 7893491 | --- | --- | --- | 0.043  | 1.031 | 8.05E-01 | 8.05E+01 |  |  |
| 7893492 | --- | --- | --- | 0.740  | 1.670 | 2.48E-01 | 2.48E+01 |  |  |
| 7893493 | --- | --- | --- | -0.244 | 0.845 | 4.93E-01 | 4.93E+01 |  |  |
| 7893494 | --- | --- | --- | -0.146 | 0.904 | 7.23E-01 | 7.23E+01 |  |  |
| 7893496 | --- | --- | --- | -0.227 | 0.854 | 6.74E-01 | 6.74E+01 |  |  |
| 7893497 | --- | --- | --- | -0.040 | 0.972 | 9.10E-01 | 9.10E+01 |  |  |
| 7893498 | --- | --- | --- | -0.004 | 0.997 | 9.85E-01 | 9.85E+01 |  |  |
| 7893500 | --- | --- | --- | -0.090 | 0.940 | 8.36E-01 | 8.36E+01 |  |  |
| 7893503 | --- | --- | --- | 0.013  | 1.009 | 9.73E-01 | 9.73E+01 |  |  |
| 7893504 | --- | --- | --- | -0.162 | 0.894 | 6.58E-01 | 6.58E+01 |  |  |
| 7893506 | --- | --- | --- | -0.130 | 0.914 | 5.91E-01 | 5.91E+01 |  |  |
| 7893507 | --- | --- | --- | 0.024  | 1.017 | 8.13E-01 | 8.13E+01 |  |  |
| 7893508 | --- | --- | --- | -0.069 | 0.953 | 8.78E-01 | 8.78E+01 |  |  |
| 7893511 | --- | --- | --- | 0.038  | 1.027 | 8.49E-01 | 8.49E+01 |  |  |
| 7893513 | --- | --- | --- | 0.023  | 1.016 | 9.32E-01 | 9.32E+01 |  |  |
| 7893514 | --- | --- | --- | -0.259 | 0.836 | 7.53E-01 | 7.53E+01 |  |  |
| 7893515 | --- | --- | --- | 0.049  | 1.034 | 7.44E-01 | 7.44E+01 |  |  |
| 7893516 | --- | --- | --- | -0.026 | 0.982 | 9.22E-01 | 9.22E+01 |  |  |
| 7893517 | --- | --- | --- | -0.081 | 0.946 | 7.64E-01 | 7.64E+01 |  |  |
| 7893518 | --- | --- | --- | 0.010  | 1.007 | 9.77E-01 | 9.77E+01 |  |  |
| 7893519 | --- | --- | --- | 0.080  | 1.057 | 8.29E-01 | 8.29E+01 |  |  |
| 7893524 | --- | --- | --- | 0.153  | 1.112 | 5.81E-02 | 5.81E+00 |  |  |
| 7893525 | --- | --- | --- | -0.262 | 0.834 | 3.18E-01 | 3.18E+01 |  |  |
| 7893527 | --- | --- | --- | 0.247  | 1.187 | 1.75E-01 | 1.75E+01 |  |  |
| 7893530 | --- | --- | --- | 0.013  | 1.009 | 9.56E-01 | 9.56E+01 |  |  |
| 7893533 | --- | --- | --- | 0.063  | 1.045 | 7.83E-01 | 7.83E+01 |  |  |
| 7893534 | --- | --- | --- | -0.122 | 0.919 | 5.81E-01 | 5.81E+01 |  |  |
| 7893536 | --- | --- | --- | 0.022  | 1.015 | 8.64E-01 | 8.64E+01 |  |  |
| 7893538 | --- | --- | --- | -0.077 | 0.948 | 8.46E-01 | 8.46E+01 |  |  |
| 7893539 | --- | --- | --- | -0.078 | 0.947 | 7.09E-01 | 7.09E+01 |  |  |
| 7893540 | --- | --- | --- | 0.041  | 1.029 | 7.62E-01 | 7.62E+01 |  |  |
| 7893542 | --- | --- | --- | -0.100 | 0.933 | 7.12E-01 | 7.12E+01 |  |  |
| 7893543 | --- | --- | --- | -0.015 | 0.990 | 9.64E-01 | 9.64E+01 |  |  |
| 7893544 | --- | --- | --- | -0.080 | 0.946 | 7.51E-01 | 7.51E+01 |  |  |
| 7893545 | --- | --- | --- | 0.056  | 1.039 | 7.50E-01 | 7.50E+01 |  |  |
| 7893546 | --- | --- | --- | -0.009 | 0.994 | 9.77E-01 | 9.77E+01 |  |  |
| 7893547 | --- | --- | --- | -0.027 | 0.981 | 9.03E-01 | 9.03E+01 |  |  |
| 7893548 | --- | --- | --- | -0.005 | 0.997 | 9.95E-01 | 9.95E+01 |  |  |
| 7893549 | --- | --- | --- | 0.051  | 1.036 | 9.30E-01 | 9.30E+01 |  |  |
| 7893550 | --- | --- | --- | -0.024 | 0.984 | 9.09E-01 | 9.09E+01 |  |  |
| 7893551 | --- | --- | --- | 0.032  | 1.022 | 9.16E-01 | 9.16E+01 |  |  |
| 7893552 | --- | --- | --- | 0.184  | 1.136 | 5.34E-01 | 5.34E+01 |  |  |
| 7893554 | --- | --- | --- | -0.066 | 0.955 | 8.01E-01 | 8.01E+01 |  |  |
| 7893555 | --- | --- | --- | -0.053 | 0.964 | 8.50E-01 | 8.50E+01 |  |  |
| 7893556 | --- | --- | --- | 0.043  | 1.030 | 9.21E-01 | 9.21E+01 |  |  |
| 7893557 | --- | --- | --- | -0.237 | 0.848 | 2.21E-01 | 2.21E+01 |  |  |
| 7893558 | --- | --- | --- | -0.006 | 0.996 | 9.92E-01 | 9.92E+01 |  |  |
| 7893559 | --- | --- | --- | 0.030  | 1.021 | 9.25E-01 | 9.25E+01 |  |  |
| 7893560 | --- | --- | --- | 0.049  | 1.035 | 8.93E-01 | 8.93E+01 |  |  |
| 7893561 | --- | --- | --- | -0.034 | 0.977 | 8.61E-01 | 8.61E+01 |  |  |
| 7893562 | --- | --- | --- | 0.119  | 1.086 | 9.23E-01 | 9.23E+01 |  |  |
| 7893564 | --- | --- | --- | -0.039 | 0.973 | 7.75E-01 | 7.75E+01 |  |  |
| 7893565 | --- | --- | --- | -0.164 | 0.892 | 5.44E-01 | 5.44E+01 |  |  |
| 7893567 | --- | --- | --- | -0.074 | 0.950 | 9.19E-01 | 9.19E+01 |  |  |
| 7893570 | --- | --- | --- | -0.376 | 0.770 | 6.54E-01 | 6.54E+01 |  |  |
| 7893571 | --- | --- | --- | -0.004 | 0.998 | 9.88E-01 | 9.88E+01 |  |  |
| 7893572 | --- | --- | --- | 0.010  | 1.007 | 9.86E-01 | 9.86E+01 |  |  |
| 7893573 | --- | --- | --- | -0.124 | 0.918 | 6.08E-01 | 6.08E+01 |  |  |
| 7893574 | --- | --- | --- | 0.106  | 1.076 | 6.87E-01 | 6.87E+01 |  |  |
| 7893575 | --- | --- | --- | 0.162  | 1.119 | 5.43E-01 | 5.43E+01 |  |  |
| 7893576 | --- | --- | --- | -0.025 | 0.983 | 9.66E-01 | 9.66E+01 |  |  |
| 7893578 | --- | --- | --- | 0.177  | 1.130 | 7.51E-01 | 7.51E+01 |  |  |
| 7893581 | --- | --- | --- | 0.254  | 1.193 | 6.16E-01 | 6.16E+01 |  |  |



|         |     |     |     |        |       |          |          |  |  |
|---------|-----|-----|-----|--------|-------|----------|----------|--|--|
| 7893582 | --- | --- | --- | -0.038 | 0.974 | 9.07E-01 | 9.07E+01 |  |  |
| 7893583 | --- | --- | --- | 0.079  | 1.056 | 7.27E-01 | 7.27E+01 |  |  |
| 7893585 | --- | --- | --- | -0.107 | 0.929 | 5.89E-01 | 5.89E+01 |  |  |
| 7893586 | --- | --- | --- | 0.001  | 1.000 | 1.00E+00 | 1.00E+02 |  |  |
| 7893587 | --- | --- | --- | -0.065 | 0.956 | 8.86E-01 | 8.86E+01 |  |  |
| 7893588 | --- | --- | --- | 0.201  | 1.150 | 6.94E-01 | 6.94E+01 |  |  |
| 7893590 | --- | --- | --- | 0.137  | 1.100 | 7.78E-01 | 7.78E+01 |  |  |
| 7893591 | --- | --- | --- | -0.103 | 0.931 | 3.43E-01 | 3.43E+01 |  |  |
| 7893592 | --- | --- | --- | 0.154  | 1.113 | 1.38E-01 | 1.38E+01 |  |  |
| 7893593 | --- | --- | --- | 0.080  | 1.057 | 8.61E-01 | 8.61E+01 |  |  |
| 7893594 | --- | --- | --- | -0.193 | 0.875 | 8.49E-01 | 8.49E+01 |  |  |
| 7893596 | --- | --- | --- | 0.302  | 1.233 | 4.67E-01 | 4.67E+01 |  |  |
| 7893598 | --- | --- | --- | 0.012  | 1.008 | 9.64E-01 | 9.64E+01 |  |  |
| 7893599 | --- | --- | --- | 0.009  | 1.006 | 9.67E-01 | 9.67E+01 |  |  |
| 7893600 | --- | --- | --- | -0.121 | 0.920 | 5.70E-01 | 5.70E+01 |  |  |
| 7893601 | --- | --- | --- | 0.078  | 1.055 | 7.27E-01 | 7.27E+01 |  |  |
| 7893602 | --- | --- | --- | 0.059  | 1.042 | 6.99E-01 | 6.99E+01 |  |  |
| 7893603 | --- | --- | --- | 0.060  | 1.042 | 6.74E-01 | 6.74E+01 |  |  |
| 7893604 | --- | --- | --- | -0.047 | 0.968 | 9.53E-01 | 9.53E+01 |  |  |
| 7893605 | --- | --- | --- | 0.032  | 1.022 | 8.05E-01 | 8.05E+01 |  |  |
| 7893606 | --- | --- | --- | 0.146  | 1.107 | 7.60E-01 | 7.60E+01 |  |  |
| 7893608 | --- | --- | --- | -0.120 | 0.920 | 7.73E-01 | 7.73E+01 |  |  |
| 7893609 | --- | --- | --- | -0.058 | 0.960 | 9.16E-01 | 9.16E+01 |  |  |
| 7893610 | --- | --- | --- | 0.136  | 1.099 | 6.33E-01 | 6.33E+01 |  |  |
| 7893613 | --- | --- | --- | 0.030  | 1.021 | 9.16E-01 | 9.16E+01 |  |  |
| 7893615 | --- | --- | --- | -0.051 | 0.965 | 9.67E-01 | 9.67E+01 |  |  |
| 7893616 | --- | --- | --- | -0.138 | 0.909 | 5.96E-01 | 5.96E+01 |  |  |
| 7893619 | --- | --- | --- | 0.343  | 1.268 | 2.60E-01 | 2.60E+01 |  |  |
| 7893622 | --- | --- | --- | 0.423  | 1.340 | 5.98E-01 | 5.98E+01 |  |  |
| 7893627 | --- | --- | --- | -0.230 | 0.853 | 6.91E-01 | 6.91E+01 |  |  |
| 7893628 | --- | --- | --- | 0.109  | 1.078 | 7.30E-01 | 7.30E+01 |  |  |
| 7893630 | --- | --- | --- | -0.157 | 0.897 | 1.11E-01 | 1.11E+01 |  |  |
| 7893631 | --- | --- | --- | 0.002  | 1.002 | 9.97E-01 | 9.97E+01 |  |  |
| 7893632 | --- | --- | --- | 0.124  | 1.090 | 1.88E-01 | 1.88E+01 |  |  |
| 7893633 | --- | --- | --- | 0.059  | 1.042 | 3.96E-01 | 3.96E+01 |  |  |
| 7893634 | --- | --- | --- | -0.025 | 0.983 | 8.87E-01 | 8.87E+01 |  |  |
| 7893637 | --- | --- | --- | 0.116  | 1.083 | 7.92E-01 | 7.92E+01 |  |  |
| 7893639 | --- | --- | --- | 0.095  | 1.068 | 6.59E-01 | 6.59E+01 |  |  |
| 7893640 | --- | --- | --- | -0.038 | 0.974 | 8.68E-01 | 8.68E+01 |  |  |
| 7893641 | --- | --- | --- | 0.126  | 1.091 | 3.05E-01 | 3.05E+01 |  |  |
| 7893642 | --- | --- | --- | 0.118  | 1.085 | 2.25E-01 | 2.25E+01 |  |  |
| 7893644 | --- | --- | --- | 0.136  | 1.099 | 5.56E-01 | 5.56E+01 |  |  |
| 7893645 | --- | --- | --- | 0.426  | 1.344 | 2.10E-01 | 2.10E+01 |  |  |
| 7893646 | --- | --- | --- | -0.120 | 0.920 | 5.26E-01 | 5.26E+01 |  |  |
| 7893647 | --- | --- | --- | 0.098  | 1.071 | 5.55E-01 | 5.55E+01 |  |  |
| 7893649 | --- | --- | --- | -0.090 | 0.939 | 6.33E-01 | 6.33E+01 |  |  |
| 7893650 | --- | --- | --- | -0.080 | 0.946 | 6.38E-01 | 6.38E+01 |  |  |
| 7893651 | --- | --- | --- | -0.029 | 0.980 | 7.51E-01 | 7.51E+01 |  |  |
| 7893653 | --- | --- | --- | 0.241  | 1.182 | 8.15E-01 | 8.15E+01 |  |  |
| 7893654 | --- | --- | --- | 0.119  | 1.086 | 7.10E-01 | 7.10E+01 |  |  |
| 7893655 | --- | --- | --- | -0.269 | 0.830 | 3.67E-01 | 3.67E+01 |  |  |
| 7893657 | --- | --- | --- | 0.019  | 1.014 | 9.64E-01 | 9.64E+01 |  |  |
| 7893658 | --- | --- | --- | -0.006 | 0.996 | 9.86E-01 | 9.86E+01 |  |  |
| 7893660 | --- | --- | --- | 0.000  | 1.000 | 9.99E-01 | 9.99E+01 |  |  |
| 7893661 | --- | --- | --- | -0.015 | 0.990 | 9.45E-01 | 9.45E+01 |  |  |
| 7893662 | --- | --- | --- | -0.022 | 0.985 | 8.75E-01 | 8.75E+01 |  |  |
| 7893663 | --- | --- | --- | 0.169  | 1.124 | 5.67E-01 | 5.67E+01 |  |  |
| 7893664 | --- | --- | --- | -0.007 | 0.995 | 9.87E-01 | 9.87E+01 |  |  |
| 7893665 | --- | --- | --- | 0.083  | 1.059 | 8.46E-01 | 8.46E+01 |  |  |
| 7893667 | --- | --- | --- | 0.081  | 1.058 | 9.00E-01 | 9.00E+01 |  |  |
| 7893668 | --- | --- | --- | -0.250 | 0.841 | 7.27E-01 | 7.27E+01 |  |  |
| 7893670 | --- | --- | --- | 0.031  | 1.021 | 8.43E-01 | 8.43E+01 |  |  |
| 7893672 | --- | --- | --- | 0.274  | 1.209 | 2.92E-01 | 2.92E+01 |  |  |
| 7893674 | --- | --- | --- | 0.299  | 1.230 | 3.75E-01 | 3.75E+01 |  |  |
| 7893675 | --- | --- | --- | -0.020 | 0.986 | 9.16E-01 | 9.16E+01 |  |  |
| 7893676 | --- | --- | --- | -0.186 | 0.879 | 6.52E-02 | 6.52E+00 |  |  |
| 7893677 | --- | --- | --- | 0.021  | 1.015 | 8.16E-01 | 8.16E+01 |  |  |
| 7893682 | --- | --- | --- | 0.105  | 1.075 | 7.72E-01 | 7.72E+01 |  |  |
| 7893683 | --- | --- | --- | 0.012  | 1.008 | 9.85E-01 | 9.85E+01 |  |  |
| 7893684 | --- | --- | --- | 0.031  | 1.022 | 9.41E-01 | 9.41E+01 |  |  |
| 7893685 | --- | --- | --- | -0.044 | 0.970 | 8.90E-01 | 8.90E+01 |  |  |
| 7893686 | --- | --- | --- | -0.137 | 0.909 | 8.15E-01 | 8.15E+01 |  |  |
| 7893688 | --- | --- | --- | 0.000  | 1.000 | 1.00E+00 | 1.00E+02 |  |  |
| 7893689 | --- | --- | --- | 0.014  | 1.010 | 9.23E-01 | 9.23E+01 |  |  |
| 7893690 | --- | --- | --- | 0.049  | 1.034 | 9.03E-01 | 9.03E+01 |  |  |
| 7893692 | --- | --- | --- | 0.000  | 1.000 | 1.00E+00 | 1.00E+02 |  |  |
| 7893695 | --- | --- | --- | 0.063  | 1.044 | 7.59E-01 | 7.59E+01 |  |  |

|         |     |     |     |        |       |          |          |  |  |
|---------|-----|-----|-----|--------|-------|----------|----------|--|--|
| 7893696 | --- | --- | --- | -0.024 | 0.983 | 9.59E-01 | 9.59E+01 |  |  |
| 7893697 | --- | --- | --- | -0.306 | 0.809 | 3.67E-01 | 3.67E+01 |  |  |
| 7893698 | --- | --- | --- | 0.077  | 1.055 | 8.09E-01 | 8.09E+01 |  |  |
| 7893699 | --- | --- | --- | 0.124  | 1.090 | 7.05E-01 | 7.05E+01 |  |  |
| 7893700 | --- | --- | --- | 0.206  | 1.154 | 1.27E-01 | 1.27E+01 |  |  |
| 7893701 | --- | --- | --- | 0.058  | 1.041 | 5.73E-01 | 5.73E+01 |  |  |
| 7893703 | --- | --- | --- | -0.051 | 0.965 | 9.49E-01 | 9.49E+01 |  |  |
| 7893704 | --- | --- | --- | 0.181  | 1.134 | 4.49E-01 | 4.49E+01 |  |  |
| 7893705 | --- | --- | --- | -0.016 | 0.989 | 9.57E-01 | 9.57E+01 |  |  |
| 7893707 | --- | --- | --- | -0.006 | 0.996 | 9.86E-01 | 9.86E+01 |  |  |
| 7893708 | --- | --- | --- | -0.030 | 0.980 | 8.24E-01 | 8.24E+01 |  |  |
| 7893709 | --- | --- | --- | 0.000  | 1.000 | 1.00E+00 | 1.00E+02 |  |  |
| 7893710 | --- | --- | --- | 0.027  | 1.019 | 8.31E-01 | 8.31E+01 |  |  |
| 7893711 | --- | --- | --- | -0.104 | 0.930 | 5.86E-01 | 5.86E+01 |  |  |
| 7893713 | --- | --- | --- | -0.014 | 0.990 | 9.63E-01 | 9.63E+01 |  |  |
| 7893714 | --- | --- | --- | 0.007  | 1.005 | 9.87E-01 | 9.87E+01 |  |  |
| 7893715 | --- | --- | --- | 0.084  | 1.060 | 6.79E-01 | 6.79E+01 |  |  |
| 7893717 | --- | --- | --- | -0.070 | 0.953 | 8.62E-01 | 8.62E+01 |  |  |
| 7893718 | --- | --- | --- | 0.020  | 1.014 | 9.82E-01 | 9.82E+01 |  |  |
| 7893720 | --- | --- | --- | 0.132  | 1.096 | 3.09E-01 | 3.09E+01 |  |  |
| 7893721 | --- | --- | --- | 0.073  | 1.052 | 6.73E-01 | 6.73E+01 |  |  |
| 7893722 | --- | --- | --- | -0.078 | 0.947 | 7.61E-01 | 7.61E+01 |  |  |
| 7893724 | --- | --- | --- | 0.153  | 1.112 | 4.39E-01 | 4.39E+01 |  |  |
| 7893725 | --- | --- | --- | 0.034  | 1.024 | 7.83E-01 | 7.83E+01 |  |  |
| 7893726 | --- | --- | --- | 0.085  | 1.060 | 6.93E-01 | 6.93E+01 |  |  |
| 7893727 | --- | --- | --- | -0.003 | 0.998 | 9.86E-01 | 9.86E+01 |  |  |
| 7893728 | --- | --- | --- | 0.079  | 1.056 | 6.78E-01 | 6.78E+01 |  |  |
| 7893729 | --- | --- | --- | 0.108  | 1.078 | 8.23E-01 | 8.23E+01 |  |  |
| 7893731 | --- | --- | --- | 0.001  | 1.001 | 9.95E-01 | 9.95E+01 |  |  |
| 7893732 | --- | --- | --- | 0.178  | 1.131 | 1.48E-02 | 1.48E+00 |  |  |
| 7893733 | --- | --- | --- | 0.134  | 1.097 | 2.26E-01 | 2.26E+01 |  |  |
| 7893734 | --- | --- | --- | 0.004  | 1.003 | 9.89E-01 | 9.89E+01 |  |  |
| 7893736 | --- | --- | --- | 0.190  | 1.141 | 7.00E-01 | 7.00E+01 |  |  |
| 7893737 | --- | --- | --- | 0.177  | 1.131 | 5.01E-01 | 5.01E+01 |  |  |
| 7893738 | --- | --- | --- | 0.057  | 1.040 | 8.32E-01 | 8.32E+01 |  |  |
| 7893739 | --- | --- | --- | -0.015 | 0.990 | 9.51E-01 | 9.51E+01 |  |  |
| 7893740 | --- | --- | --- | 0.123  | 1.089 | 4.15E-01 | 4.15E+01 |  |  |
| 7893743 | --- | --- | --- | 0.055  | 1.039 | 8.62E-01 | 8.62E+01 |  |  |
| 7893744 | --- | --- | --- | 0.053  | 1.038 | 7.48E-01 | 7.48E+01 |  |  |
| 7893745 | --- | --- | --- | -0.007 | 0.995 | 9.89E-01 | 9.89E+01 |  |  |
| 7893747 | --- | --- | --- | 0.054  | 1.038 | 8.81E-01 | 8.81E+01 |  |  |
| 7893748 | --- | --- | --- | 0.040  | 1.028 | 9.26E-01 | 9.26E+01 |  |  |
| 7893750 | --- | --- | --- | 0.073  | 1.052 | 8.72E-01 | 8.72E+01 |  |  |
| 7893751 | --- | --- | --- | 0.197  | 1.147 | 6.35E-01 | 6.35E+01 |  |  |
| 7893752 | --- | --- | --- | -0.095 | 0.936 | 8.31E-01 | 8.31E+01 |  |  |
| 7893754 | --- | --- | --- | -0.006 | 0.996 | 9.89E-01 | 9.89E+01 |  |  |
| 7893757 | --- | --- | --- | -0.095 | 0.937 | 7.99E-01 | 7.99E+01 |  |  |
| 7893759 | --- | --- | --- | 0.043  | 1.030 | 8.97E-01 | 8.97E+01 |  |  |
| 7893761 | --- | --- | --- | -0.031 | 0.979 | 9.61E-01 | 9.61E+01 |  |  |
| 7893762 | --- | --- | --- | -0.019 | 0.987 | 8.85E-01 | 8.85E+01 |  |  |
| 7893763 | --- | --- | --- | 0.004  | 1.003 | 9.89E-01 | 9.89E+01 |  |  |
| 7893764 | --- | --- | --- | 0.155  | 1.113 | 4.68E-01 | 4.68E+01 |  |  |
| 7893765 | --- | --- | --- | 0.227  | 1.171 | 3.57E-01 | 3.57E+01 |  |  |
| 7893766 | --- | --- | --- | 0.085  | 1.061 | 7.64E-01 | 7.64E+01 |  |  |
| 7893767 | --- | --- | --- | 0.051  | 1.036 | 8.76E-01 | 8.76E+01 |  |  |
| 7893768 | --- | --- | --- | 0.168  | 1.124 | 7.42E-01 | 7.42E+01 |  |  |
| 7893769 | --- | --- | --- | -0.039 | 0.973 | 7.63E-01 | 7.63E+01 |  |  |
| 7893771 | --- | --- | --- | 0.017  | 1.012 | 9.64E-01 | 9.64E+01 |  |  |
| 7893773 | --- | --- | --- | 0.042  | 1.029 | 5.98E-01 | 5.98E+01 |  |  |
| 7893774 | --- | --- | --- | -0.231 | 0.852 | 1.76E-01 | 1.76E+01 |  |  |
| 7893776 | --- | --- | --- | 0.225  | 1.169 | 7.23E-01 | 7.23E+01 |  |  |
| 7893777 | --- | --- | --- | 0.131  | 1.095 | 5.34E-01 | 5.34E+01 |  |  |
| 7893778 | --- | --- | --- | 0.071  | 1.050 | 8.29E-01 | 8.29E+01 |  |  |
| 7893779 | --- | --- | --- | 0.024  | 1.017 | 8.69E-01 | 8.69E+01 |  |  |
| 7893781 | --- | --- | --- | -0.024 | 0.984 | 9.03E-01 | 9.03E+01 |  |  |
| 7893782 | --- | --- | --- | 0.182  | 1.134 | 4.18E-01 | 4.18E+01 |  |  |
| 7893783 | --- | --- | --- | -0.020 | 0.986 | 8.96E-01 | 8.96E+01 |  |  |
| 7893784 | --- | --- | --- | -0.014 | 0.990 | 9.81E-01 | 9.81E+01 |  |  |
| 7893785 | --- | --- | --- | -0.039 | 0.973 | 7.63E-01 | 7.63E+01 |  |  |
| 7893786 | --- | --- | --- | 0.321  | 1.249 | 2.83E-01 | 2.83E+01 |  |  |
| 7893788 | --- | --- | --- | -0.059 | 0.960 | 7.23E-01 | 7.23E+01 |  |  |
| 7893789 | --- | --- | --- | -0.073 | 0.951 | 8.13E-01 | 8.13E+01 |  |  |
| 7893790 | --- | --- | --- | -0.049 | 0.967 | 8.14E-01 | 8.14E+01 |  |  |
| 7893791 | --- | --- | --- | 0.100  | 1.072 | 8.00E-01 | 8.00E+01 |  |  |
| 7893792 | --- | --- | --- | 0.030  | 1.021 | 8.75E-01 | 8.75E+01 |  |  |
| 7893793 | --- | --- | --- | -0.069 | 0.953 | 7.97E-01 | 7.97E+01 |  |  |
| 7893794 | --- | --- | --- | -0.067 | 0.955 | 9.19E-01 | 9.19E+01 |  |  |

|         |     |     |     |        |       |          |          |  |  |
|---------|-----|-----|-----|--------|-------|----------|----------|--|--|
| 7893796 | --- | --- | --- | -0.020 | 0.986 | 9.63E-01 | 9.63E+01 |  |  |
| 7893797 | --- | --- | --- | 0.167  | 1.123 | 7.56E-01 | 7.56E+01 |  |  |
| 7893798 | --- | --- | --- | -0.058 | 0.961 | 8.82E-01 | 8.82E+01 |  |  |
| 7893800 | --- | --- | --- | 0.086  | 1.061 | 6.60E-01 | 6.60E+01 |  |  |
| 7893802 | --- | --- | --- | 0.062  | 1.044 | 5.70E-01 | 5.70E+01 |  |  |
| 7893804 | --- | --- | --- | 0.300  | 1.231 | 4.43E-01 | 4.43E+01 |  |  |
| 7893805 | --- | --- | --- | 0.032  | 1.023 | 9.22E-01 | 9.22E+01 |  |  |
| 7893806 | --- | --- | --- | 0.018  | 1.013 | 9.64E-01 | 9.64E+01 |  |  |
| 7893807 | --- | --- | --- | -0.085 | 0.943 | 7.41E-01 | 7.41E+01 |  |  |
| 7893808 | --- | --- | --- | 0.068  | 1.048 | 8.25E-01 | 8.25E+01 |  |  |
| 7893809 | --- | --- | --- | -0.021 | 0.986 | 9.55E-01 | 9.55E+01 |  |  |
| 7893810 | --- | --- | --- | -0.099 | 0.934 | 7.79E-01 | 7.79E+01 |  |  |
| 7893812 | --- | --- | --- | -0.052 | 0.964 | 7.64E-01 | 7.64E+01 |  |  |
| 7893813 | --- | --- | --- | 0.111  | 1.080 | 8.06E-01 | 8.06E+01 |  |  |
| 7893814 | --- | --- | --- | 0.372  | 1.294 | 6.25E-01 | 6.25E+01 |  |  |
| 7893815 | --- | --- | --- | 0.068  | 1.048 | 4.04E-01 | 4.04E+01 |  |  |
| 7893816 | --- | --- | --- | 0.077  | 1.055 | 8.15E-01 | 8.15E+01 |  |  |
| 7893817 | --- | --- | --- | 0.151  | 1.110 | 8.04E-01 | 8.04E+01 |  |  |
| 7893818 | --- | --- | --- | -0.090 | 0.939 | 7.34E-01 | 7.34E+01 |  |  |
| 7893819 | --- | --- | --- | 0.257  | 1.195 | 4.96E-01 | 4.96E+01 |  |  |
| 7893820 | --- | --- | --- | -0.033 | 0.977 | 8.69E-01 | 8.69E+01 |  |  |
| 7893821 | --- | --- | --- | 0.155  | 1.114 | 5.92E-01 | 5.92E+01 |  |  |
| 7893822 | --- | --- | --- | -0.048 | 0.967 | 8.91E-01 | 8.91E+01 |  |  |
| 7893823 | --- | --- | --- | -0.558 | 0.679 | 6.30E-02 | 6.30E+00 |  |  |
| 7893824 | --- | --- | --- | 0.036  | 1.025 | 8.80E-01 | 8.80E+01 |  |  |
| 7893825 | --- | --- | --- | 0.179  | 1.132 | 6.36E-01 | 6.36E+01 |  |  |
| 7893827 | --- | --- | --- | -0.148 | 0.902 | 3.43E-01 | 3.43E+01 |  |  |
| 7893828 | --- | --- | --- | -0.045 | 0.969 | 9.24E-01 | 9.24E+01 |  |  |
| 7893830 | --- | --- | --- | -0.147 | 0.903 | 8.53E-01 | 8.53E+01 |  |  |
| 7893831 | --- | --- | --- | -0.189 | 0.877 | 3.19E-01 | 3.19E+01 |  |  |
| 7893832 | --- | --- | --- | -0.166 | 0.891 | 8.56E-01 | 8.56E+01 |  |  |
| 7893833 | --- | --- | --- | 0.094  | 1.067 | 7.08E-01 | 7.08E+01 |  |  |
| 7893834 | --- | --- | --- | 0.003  | 1.002 | 9.97E-01 | 9.97E+01 |  |  |
| 7893835 | --- | --- | --- | 0.010  | 1.007 | 9.72E-01 | 9.72E+01 |  |  |
| 7893836 | --- | --- | --- | 0.025  | 1.017 | 8.56E-01 | 8.56E+01 |  |  |
| 7893838 | --- | --- | --- | 0.016  | 1.011 | 9.16E-01 | 9.16E+01 |  |  |
| 7893839 | --- | --- | --- | 0.125  | 1.091 | 8.53E-01 | 8.53E+01 |  |  |
| 7893840 | --- | --- | --- | -0.084 | 0.943 | 4.97E-01 | 4.97E+01 |  |  |
| 7893841 | --- | --- | --- | -0.159 | 0.896 | 4.03E-01 | 4.03E+01 |  |  |
| 7893842 | --- | --- | --- | -0.177 | 0.884 | 5.04E-01 | 5.04E+01 |  |  |
| 7893843 | --- | --- | --- | -0.072 | 0.951 | 9.26E-01 | 9.26E+01 |  |  |
| 7893848 | --- | --- | --- | 0.168  | 1.124 | 7.75E-01 | 7.75E+01 |  |  |
| 7893849 | --- | --- | --- | -0.059 | 0.960 | 9.32E-01 | 9.32E+01 |  |  |
| 7893850 | --- | --- | --- | 0.006  | 1.004 | 9.85E-01 | 9.85E+01 |  |  |
| 7893853 | --- | --- | --- | 0.080  | 1.057 | 6.75E-01 | 6.75E+01 |  |  |
| 7893855 | --- | --- | --- | -0.091 | 0.939 | 5.97E-01 | 5.97E+01 |  |  |
| 7893856 | --- | --- | --- | -0.089 | 0.940 | 7.12E-01 | 7.12E+01 |  |  |
| 7893857 | --- | --- | --- | -0.028 | 0.981 | 9.49E-01 | 9.49E+01 |  |  |
| 7893861 | --- | --- | --- | 0.066  | 1.046 | 7.24E-01 | 7.24E+01 |  |  |
| 7893862 | --- | --- | --- | 0.340  | 1.266 | 5.53E-01 | 5.53E+01 |  |  |
| 7893866 | --- | --- | --- | -0.079 | 0.946 | 5.51E-01 | 5.51E+01 |  |  |
| 7893867 | --- | --- | --- | -0.032 | 0.978 | 9.46E-01 | 9.46E+01 |  |  |
| 7893868 | --- | --- | --- | 0.107  | 1.077 | 8.24E-01 | 8.24E+01 |  |  |
| 7893869 | --- | --- | --- | 0.049  | 1.034 | 9.18E-01 | 9.18E+01 |  |  |
| 7893870 | --- | --- | --- | 0.017  | 1.012 | 9.74E-01 | 9.74E+01 |  |  |
| 7893871 | --- | --- | --- | -0.098 | 0.934 | 6.92E-01 | 6.92E+01 |  |  |
| 7893872 | --- | --- | --- | -0.134 | 0.912 | 5.53E-01 | 5.53E+01 |  |  |
| 7893874 | --- | --- | --- | 0.005  | 1.004 | 9.92E-01 | 9.92E+01 |  |  |
| 7893875 | --- | --- | --- | -0.006 | 0.996 | 9.83E-01 | 9.83E+01 |  |  |
| 7893876 | --- | --- | --- | -0.075 | 0.949 | 5.29E-01 | 5.29E+01 |  |  |
| 7893877 | --- | --- | --- | 0.032  | 1.023 | 9.67E-01 | 9.67E+01 |  |  |
| 7893878 | --- | --- | --- | 0.080  | 1.057 | 8.43E-01 | 8.43E+01 |  |  |
| 7893879 | --- | --- | --- | -0.181 | 0.882 | 7.13E-01 | 7.13E+01 |  |  |
| 7893880 | --- | --- | --- | 0.098  | 1.070 | 4.27E-01 | 4.27E+01 |  |  |
| 7893881 | --- | --- | --- | 0.253  | 1.191 | 7.76E-02 | 7.76E+00 |  |  |
| 7893883 | --- | --- | --- | 0.180  | 1.133 | 4.96E-01 | 4.96E+01 |  |  |
| 7893884 | --- | --- | --- | 0.021  | 1.015 | 9.52E-01 | 9.52E+01 |  |  |
| 7893886 | --- | --- | --- | 0.133  | 1.096 | 7.44E-01 | 7.44E+01 |  |  |
| 7893889 | --- | --- | --- | -0.010 | 0.993 | 9.75E-01 | 9.75E+01 |  |  |
| 7893890 | --- | --- | --- | 0.138  | 1.101 | 8.01E-01 | 8.01E+01 |  |  |
| 7893892 | --- | --- | --- | -0.187 | 0.878 | 4.20E-01 | 4.20E+01 |  |  |
| 7893893 | --- | --- | --- | 0.074  | 1.052 | 6.02E-01 | 6.02E+01 |  |  |
| 7893894 | --- | --- | --- | 0.033  | 1.023 | 9.53E-01 | 9.53E+01 |  |  |
| 7893896 | --- | --- | --- | -0.046 | 0.968 | 9.12E-01 | 9.12E+01 |  |  |
| 7893898 | --- | --- | --- | 0.353  | 1.278 | 4.12E-01 | 4.12E+01 |  |  |
| 7893900 | --- | --- | --- | 0.028  | 1.019 | 9.40E-01 | 9.40E+01 |  |  |
| 7893901 | --- | --- | --- | 0.028  | 1.020 | 9.09E-01 | 9.09E+01 |  |  |

|         |     |     |     |        |       |          |          |  |  |
|---------|-----|-----|-----|--------|-------|----------|----------|--|--|
| 7893902 | --- | --- | --- | 0.015  | 1.011 | 9.83E-01 | 9.83E+01 |  |  |
| 7893904 | --- | --- | --- | -0.020 | 0.986 | 9.53E-01 | 9.53E+01 |  |  |
| 7893905 | --- | --- | --- | -0.071 | 0.952 | 7.75E-01 | 7.75E+01 |  |  |
| 7893906 | --- | --- | --- | -0.027 | 0.982 | 9.64E-01 | 9.64E+01 |  |  |
| 7893908 | --- | --- | --- | 0.058  | 1.041 | 9.34E-01 | 9.34E+01 |  |  |
| 7893910 | --- | --- | --- | -0.138 | 0.909 | 4.12E-01 | 4.12E+01 |  |  |
| 7893913 | --- | --- | --- | 0.078  | 1.055 | 7.61E-01 | 7.61E+01 |  |  |
| 7893914 | --- | --- | --- | 0.030  | 1.021 | 8.31E-01 | 8.31E+01 |  |  |
| 7893915 | --- | --- | --- | 0.382  | 1.303 | 4.99E-01 | 4.99E+01 |  |  |
| 7893916 | --- | --- | --- | -0.092 | 0.939 | 5.52E-01 | 5.52E+01 |  |  |
| 7893919 | --- | --- | --- | -0.020 | 0.986 | 9.24E-01 | 9.24E+01 |  |  |
| 7893920 | --- | --- | --- | -0.228 | 0.854 | 7.16E-01 | 7.16E+01 |  |  |
| 7893921 | --- | --- | --- | -0.333 | 0.794 | 1.11E-01 | 1.11E+01 |  |  |
| 7893922 | --- | --- | --- | 0.094  | 1.067 | 6.11E-01 | 6.11E+01 |  |  |
| 7893923 | --- | --- | --- | 0.041  | 1.029 | 6.94E-01 | 6.94E+01 |  |  |
| 7893924 | --- | --- | --- | 0.343  | 1.268 | 6.06E-01 | 6.06E+01 |  |  |
| 7893925 | --- | --- | --- | 0.244  | 1.184 | 1.86E-01 | 1.86E+01 |  |  |
| 7893926 | --- | --- | --- | -0.094 | 0.937 | 4.51E-01 | 4.51E+01 |  |  |
| 7893928 | --- | --- | --- | -0.004 | 0.997 | 9.87E-01 | 9.87E+01 |  |  |
| 7893929 | --- | --- | --- | 0.015  | 1.010 | 9.62E-01 | 9.62E+01 |  |  |
| 7893932 | --- | --- | --- | -0.140 | 0.908 | 4.04E-01 | 4.04E+01 |  |  |
| 7893933 | --- | --- | --- | 0.147  | 1.107 | 4.26E-01 | 4.26E+01 |  |  |
| 7893934 | --- | --- | --- | -0.069 | 0.953 | 7.72E-01 | 7.72E+01 |  |  |
| 7893936 | --- | --- | --- | 0.049  | 1.035 | 9.15E-01 | 9.15E+01 |  |  |
| 7893937 | --- | --- | --- | 0.069  | 1.049 | 6.54E-01 | 6.54E+01 |  |  |
| 7893938 | --- | --- | --- | -0.045 | 0.970 | 8.26E-01 | 8.26E+01 |  |  |
| 7893939 | --- | --- | --- | 0.064  | 1.045 | 8.06E-01 | 8.06E+01 |  |  |
| 7893940 | --- | --- | --- | 0.123  | 1.089 | 8.10E-01 | 8.10E+01 |  |  |
| 7893941 | --- | --- | --- | -0.072 | 0.951 | 7.13E-01 | 7.13E+01 |  |  |
| 7893942 | --- | --- | --- | -0.058 | 0.961 | 8.60E-01 | 8.60E+01 |  |  |
| 7893943 | --- | --- | --- | -0.263 | 0.833 | 5.17E-01 | 5.17E+01 |  |  |
| 7893946 | --- | --- | --- | 0.093  | 1.067 | 5.55E-01 | 5.55E+01 |  |  |
| 7893947 | --- | --- | --- | 0.054  | 1.038 | 9.03E-01 | 9.03E+01 |  |  |
| 7893948 | --- | --- | --- | 0.035  | 1.025 | 8.96E-01 | 8.96E+01 |  |  |
| 7893949 | --- | --- | --- | 0.038  | 1.026 | 8.27E-01 | 8.27E+01 |  |  |
| 7893950 | --- | --- | --- | 0.237  | 1.178 | 8.06E-01 | 8.06E+01 |  |  |
| 7893952 | --- | --- | --- | -0.030 | 0.979 | 9.03E-01 | 9.03E+01 |  |  |
| 7893953 | --- | --- | --- | 0.043  | 1.030 | 7.67E-01 | 7.67E+01 |  |  |
| 7893954 | --- | --- | --- | 0.088  | 1.063 | 5.96E-01 | 5.96E+01 |  |  |
| 7893955 | --- | --- | --- | 0.076  | 1.054 | 8.74E-01 | 8.74E+01 |  |  |
| 7893956 | --- | --- | --- | 0.025  | 1.018 | 8.06E-01 | 8.06E+01 |  |  |
| 7893957 | --- | --- | --- | -0.042 | 0.972 | 9.53E-01 | 9.53E+01 |  |  |
| 7893958 | --- | --- | --- | -0.116 | 0.922 | 4.32E-01 | 4.32E+01 |  |  |
| 7893959 | --- | --- | --- | -0.040 | 0.973 | 9.28E-01 | 9.28E+01 |  |  |
| 7893960 | --- | --- | --- | 0.023  | 1.016 | 9.12E-01 | 9.12E+01 |  |  |
| 7893961 | --- | --- | --- | -0.163 | 0.893 | 2.56E-01 | 2.56E+01 |  |  |
| 7893962 | --- | --- | --- | 0.047  | 1.033 | 9.32E-01 | 9.32E+01 |  |  |
| 7893965 | --- | --- | --- | 0.030  | 1.021 | 9.64E-01 | 9.64E+01 |  |  |
| 7893966 | --- | --- | --- | -0.016 | 0.989 | 9.53E-01 | 9.53E+01 |  |  |
| 7893967 | --- | --- | --- | -0.006 | 0.996 | 9.90E-01 | 9.90E+01 |  |  |
| 7893968 | --- | --- | --- | -0.023 | 0.984 | 9.27E-01 | 9.27E+01 |  |  |
| 7893969 | --- | --- | --- | -0.004 | 0.997 | 9.96E-01 | 9.96E+01 |  |  |
| 7893972 | --- | --- | --- | -0.012 | 0.992 | 9.64E-01 | 9.64E+01 |  |  |
| 7893973 | --- | --- | --- | 0.129  | 1.093 | 5.41E-01 | 5.41E+01 |  |  |
| 7893976 | --- | --- | --- | 0.057  | 1.041 | 8.57E-01 | 8.57E+01 |  |  |
| 7893978 | --- | --- | --- | 0.128  | 1.093 | 7.97E-01 | 7.97E+01 |  |  |
| 7893979 | --- | --- | --- | -0.092 | 0.938 | 6.50E-01 | 6.50E+01 |  |  |
| 7893980 | --- | --- | --- | 0.003  | 1.002 | 9.97E-01 | 9.97E+01 |  |  |
| 7893981 | --- | --- | --- | -0.059 | 0.960 | 8.34E-01 | 8.34E+01 |  |  |
| 7893982 | --- | --- | --- | 0.228  | 1.171 | 6.87E-01 | 6.87E+01 |  |  |
| 7893983 | --- | --- | --- | 0.059  | 1.041 | 9.50E-01 | 9.50E+01 |  |  |
| 7893985 | --- | --- | --- | 0.045  | 1.032 | 9.27E-01 | 9.27E+01 |  |  |
| 7893986 | --- | --- | --- | 0.181  | 1.134 | 5.38E-01 | 5.38E+01 |  |  |
| 7893989 | --- | --- | --- | -0.131 | 0.913 | 8.62E-01 | 8.62E+01 |  |  |
| 7893991 | --- | --- | --- | -0.139 | 0.908 | 4.97E-01 | 4.97E+01 |  |  |
| 7893992 | --- | --- | --- | -0.171 | 0.888 | 7.52E-01 | 7.52E+01 |  |  |
| 7893993 | --- | --- | --- | 0.014  | 1.010 | 8.99E-01 | 8.99E+01 |  |  |
| 7893997 | --- | --- | --- | -0.048 | 0.968 | 9.36E-01 | 9.36E+01 |  |  |
| 7893998 | --- | --- | --- | 0.176  | 1.130 | 6.17E-01 | 6.17E+01 |  |  |
| 7894000 | --- | --- | --- | 0.034  | 1.024 | 7.53E-01 | 7.53E+01 |  |  |
| 7894001 | --- | --- | --- | -0.123 | 0.918 | 8.31E-01 | 8.31E+01 |  |  |
| 7894002 | --- | --- | --- | 0.129  | 1.094 | 7.75E-01 | 7.75E+01 |  |  |
| 7894005 | --- | --- | --- | -0.050 | 0.966 | 7.23E-01 | 7.23E+01 |  |  |
| 7894007 | --- | --- | --- | 0.017  | 1.012 | 9.12E-01 | 9.12E+01 |  |  |
| 7894008 | --- | --- | --- | -0.083 | 0.944 | 8.68E-01 | 8.68E+01 |  |  |
| 7894009 | --- | --- | --- | 0.081  | 1.058 | 8.33E-01 | 8.33E+01 |  |  |
| 7894010 | --- | --- | --- | -0.100 | 0.933 | 7.63E-01 | 7.63E+01 |  |  |

|         |     |     |     |        |       |          |          |  |  |
|---------|-----|-----|-----|--------|-------|----------|----------|--|--|
| 7894011 | --- | --- | --- | 0.048  | 1.034 | 8.58E-01 | 8.58E+01 |  |  |
| 7894012 | --- | --- | --- | -0.077 | 0.948 | 6.48E-01 | 6.48E+01 |  |  |
| 7894013 | --- | --- | --- | -0.058 | 0.960 | 9.36E-01 | 9.36E+01 |  |  |
| 7894015 | --- | --- | --- | -0.057 | 0.961 | 7.53E-01 | 7.53E+01 |  |  |
| 7894016 | --- | --- | --- | 0.057  | 1.040 | 9.16E-01 | 9.16E+01 |  |  |
| 7894017 | --- | --- | --- | -0.100 | 0.933 | 8.52E-01 | 8.52E+01 |  |  |
| 7894018 | --- | --- | --- | 0.220  | 1.165 | 5.03E-01 | 5.03E+01 |  |  |
| 7894019 | --- | --- | --- | 0.043  | 1.030 | 8.78E-01 | 8.78E+01 |  |  |
| 7894020 | --- | --- | --- | -0.063 | 0.957 | 8.52E-01 | 8.52E+01 |  |  |
| 7894024 | --- | --- | --- | -0.201 | 0.870 | 6.77E-01 | 6.77E+01 |  |  |
| 7894026 | --- | --- | --- | 0.218  | 1.163 | 4.16E-01 | 4.16E+01 |  |  |
| 7894027 | --- | --- | --- | 0.089  | 1.064 | 8.52E-01 | 8.52E+01 |  |  |
| 7894028 | --- | --- | --- | 0.100  | 1.072 | 8.04E-01 | 8.04E+01 |  |  |
| 7894029 | --- | --- | --- | -0.110 | 0.926 | 3.56E-01 | 3.56E+01 |  |  |
| 7894030 | --- | --- | --- | 0.036  | 1.025 | 9.23E-01 | 9.23E+01 |  |  |
| 7894031 | --- | --- | --- | 0.019  | 1.013 | 9.27E-01 | 9.27E+01 |  |  |
| 7894033 | --- | --- | --- | 0.036  | 1.025 | 7.95E-01 | 7.95E+01 |  |  |
| 7894036 | --- | --- | --- | 0.034  | 1.024 | 8.15E-01 | 8.15E+01 |  |  |
| 7894037 | --- | --- | --- | -0.026 | 0.982 | 8.67E-01 | 8.67E+01 |  |  |
| 7894041 | --- | --- | --- | -0.090 | 0.939 | 6.37E-01 | 6.37E+01 |  |  |
| 7894042 | --- | --- | --- | 0.020  | 1.014 | 9.53E-01 | 9.53E+01 |  |  |
| 7894043 | --- | --- | --- | -0.040 | 0.973 | 7.10E-01 | 7.10E+01 |  |  |
| 7894044 | --- | --- | --- | 0.148  | 1.108 | 6.52E-01 | 6.52E+01 |  |  |
| 7894045 | --- | --- | --- | 0.131  | 1.095 | 6.07E-01 | 6.07E+01 |  |  |
| 7894046 | --- | --- | --- | -0.033 | 0.977 | 9.35E-01 | 9.35E+01 |  |  |
| 7894048 | --- | --- | --- | 0.047  | 1.033 | 7.99E-01 | 7.99E+01 |  |  |
| 7894049 | --- | --- | --- | -0.073 | 0.951 | 8.01E-01 | 8.01E+01 |  |  |
| 7894050 | --- | --- | --- | 0.226  | 1.170 | 4.53E-01 | 4.53E+01 |  |  |
| 7894051 | --- | --- | --- | -0.006 | 0.996 | 9.86E-01 | 9.86E+01 |  |  |
| 7894052 | --- | --- | --- | -0.032 | 0.978 | 9.53E-01 | 9.53E+01 |  |  |
| 7894055 | --- | --- | --- | 0.007  | 1.005 | 9.84E-01 | 9.84E+01 |  |  |
| 7894056 | --- | --- | --- | -0.083 | 0.944 | 7.46E-01 | 7.46E+01 |  |  |
| 7894057 | --- | --- | --- | -0.044 | 0.970 | 8.49E-01 | 8.49E+01 |  |  |
| 7894058 | --- | --- | --- | -0.037 | 0.974 | 8.73E-01 | 8.73E+01 |  |  |
| 7894060 | --- | --- | --- | -0.151 | 0.901 | 5.17E-01 | 5.17E+01 |  |  |
| 7894061 | --- | --- | --- | 0.018  | 1.013 | 9.35E-01 | 9.35E+01 |  |  |
| 7894062 | --- | --- | --- | 0.099  | 1.071 | 6.34E-01 | 6.34E+01 |  |  |
| 7894063 | --- | --- | --- | 0.009  | 1.006 | 9.70E-01 | 9.70E+01 |  |  |
| 7894064 | --- | --- | --- | -0.106 | 0.929 | 8.08E-01 | 8.08E+01 |  |  |
| 7894067 | --- | --- | --- | -0.053 | 0.964 | 9.28E-01 | 9.28E+01 |  |  |
| 7894068 | --- | --- | --- | -0.096 | 0.935 | 7.82E-01 | 7.82E+01 |  |  |
| 7894069 | --- | --- | --- | 0.169  | 1.124 | 6.91E-01 | 6.91E+01 |  |  |
| 7894070 | --- | --- | --- | 0.004  | 1.003 | 9.90E-01 | 9.90E+01 |  |  |
| 7894072 | --- | --- | --- | 0.004  | 1.003 | 9.85E-01 | 9.85E+01 |  |  |
| 7894073 | --- | --- | --- | -0.182 | 0.882 | 7.38E-01 | 7.38E+01 |  |  |
| 7894074 | --- | --- | --- | 0.073  | 1.052 | 6.09E-01 | 6.09E+01 |  |  |
| 7894075 | --- | --- | --- | 0.051  | 1.036 | 9.28E-01 | 9.28E+01 |  |  |
| 7894076 | --- | --- | --- | -0.080 | 0.946 | 7.51E-01 | 7.51E+01 |  |  |
| 7894078 | --- | --- | --- | -0.051 | 0.965 | 8.53E-01 | 8.53E+01 |  |  |
| 7894080 | --- | --- | --- | 0.122  | 1.088 | 6.89E-01 | 6.89E+01 |  |  |
| 7894081 | --- | --- | --- | 0.170  | 1.125 | 7.56E-01 | 7.56E+01 |  |  |
| 7894083 | --- | --- | --- | 0.076  | 1.054 | 6.59E-01 | 6.59E+01 |  |  |
| 7894085 | --- | --- | --- | 0.037  | 1.026 | 8.64E-01 | 8.64E+01 |  |  |
| 7894086 | --- | --- | --- | -0.013 | 0.991 | 9.51E-01 | 9.51E+01 |  |  |
| 7894087 | --- | --- | --- | -0.048 | 0.967 | 7.27E-01 | 7.27E+01 |  |  |
| 7894088 | --- | --- | --- | 0.056  | 1.039 | 7.50E-01 | 7.50E+01 |  |  |
| 7894089 | --- | --- | --- | -0.038 | 0.974 | 9.16E-01 | 9.16E+01 |  |  |
| 7894091 | --- | --- | --- | -0.094 | 0.937 | 8.94E-01 | 8.94E+01 |  |  |
| 7894092 | --- | --- | --- | 0.100  | 1.072 | 5.48E-01 | 5.48E+01 |  |  |
| 7894093 | --- | --- | --- | 0.134  | 1.098 | 8.16E-01 | 8.16E+01 |  |  |
| 7894094 | --- | --- | --- | 0.126  | 1.091 | 4.23E-01 | 4.23E+01 |  |  |
| 7894096 | --- | --- | --- | -0.148 | 0.902 | 6.24E-01 | 6.24E+01 |  |  |
| 7894097 | --- | --- | --- | 0.067  | 1.047 | 6.84E-01 | 6.84E+01 |  |  |
| 7894098 | --- | --- | --- | -0.026 | 0.982 | 8.92E-01 | 8.92E+01 |  |  |
| 7894100 | --- | --- | --- | -0.070 | 0.953 | 7.87E-01 | 7.87E+01 |  |  |
| 7894102 | --- | --- | --- | 0.025  | 1.018 | 8.86E-01 | 8.86E+01 |  |  |
| 7894103 | --- | --- | --- | -0.105 | 0.930 | 7.15E-01 | 7.15E+01 |  |  |
| 7894104 | --- | --- | --- | -0.041 | 0.972 | 7.36E-01 | 7.36E+01 |  |  |
| 7894106 | --- | --- | --- | -0.060 | 0.960 | 8.91E-01 | 8.91E+01 |  |  |
| 7894107 | --- | --- | --- | 0.098  | 1.070 | 6.06E-01 | 6.06E+01 |  |  |
| 7894110 | --- | --- | --- | 0.054  | 1.038 | 7.49E-01 | 7.49E+01 |  |  |
| 7894111 | --- | --- | --- | 0.004  | 1.002 | 9.96E-01 | 9.96E+01 |  |  |
| 7894112 | --- | --- | --- | -0.419 | 0.748 | 4.15E-01 | 4.15E+01 |  |  |
| 7894114 | --- | --- | --- | 0.024  | 1.017 | 9.27E-01 | 9.27E+01 |  |  |
| 7894115 | --- | --- | --- | 0.010  | 1.007 | 9.80E-01 | 9.80E+01 |  |  |
| 7894116 | --- | --- | --- | 0.068  | 1.048 | 8.87E-01 | 8.87E+01 |  |  |
| 7894117 | --- | --- | --- | -0.060 | 0.959 | 8.42E-01 | 8.42E+01 |  |  |

|         |     |     |     |        |       |          |          |  |  |
|---------|-----|-----|-----|--------|-------|----------|----------|--|--|
| 7894118 | --- | --- | --- | -0.055 | 0.963 | 8.82E-01 | 8.82E+01 |  |  |
| 7894119 | --- | --- | --- | -0.080 | 0.946 | 5.83E-01 | 5.83E+01 |  |  |
| 7894120 | --- | --- | --- | 0.271  | 1.206 | 4.70E-01 | 4.70E+01 |  |  |
| 7894122 | --- | --- | --- | 0.027  | 1.019 | 8.05E-01 | 8.05E+01 |  |  |
| 7894124 | --- | --- | --- | 0.049  | 1.035 | 9.50E-01 | 9.50E+01 |  |  |
| 7894125 | --- | --- | --- | -0.004 | 0.997 | 9.86E-01 | 9.86E+01 |  |  |
| 7894126 | --- | --- | --- | 0.106  | 1.076 | 2.94E-01 | 2.94E+01 |  |  |
| 7894128 | --- | --- | --- | 0.252  | 1.191 | 3.41E-01 | 3.41E+01 |  |  |
| 7894129 | --- | --- | --- | 0.125  | 1.090 | 8.07E-01 | 8.07E+01 |  |  |
| 7894131 | --- | --- | --- | 0.113  | 1.082 | 3.60E-01 | 3.60E+01 |  |  |
| 7894132 | --- | --- | --- | -0.042 | 0.971 | 8.41E-01 | 8.41E+01 |  |  |
| 7894134 | --- | --- | --- | -0.138 | 0.909 | 1.59E-01 | 1.59E+01 |  |  |
| 7894135 | --- | --- | --- | -0.072 | 0.951 | 4.48E-01 | 4.48E+01 |  |  |
| 7894136 | --- | --- | --- | 0.196  | 1.146 | 1.99E-01 | 1.99E+01 |  |  |
| 7894138 | --- | --- | --- | -0.144 | 0.905 | 5.67E-01 | 5.67E+01 |  |  |
| 7894140 | --- | --- | --- | -0.027 | 0.981 | 9.64E-01 | 9.64E+01 |  |  |
| 7894141 | --- | --- | --- | 0.029  | 1.021 | 9.37E-01 | 9.37E+01 |  |  |
| 7894142 | --- | --- | --- | 0.075  | 1.053 | 8.06E-01 | 8.06E+01 |  |  |
| 7894144 | --- | --- | --- | 0.026  | 1.018 | 9.57E-01 | 9.57E+01 |  |  |
| 7894145 | --- | --- | --- | -0.001 | 0.999 | 9.94E-01 | 9.94E+01 |  |  |
| 7894146 | --- | --- | --- | 0.039  | 1.028 | 9.03E-01 | 9.03E+01 |  |  |
| 7894148 | --- | --- | --- | 0.106  | 1.076 | 4.97E-01 | 4.97E+01 |  |  |
| 7894149 | --- | --- | --- | 0.088  | 1.063 | 8.84E-01 | 8.84E+01 |  |  |
| 7894151 | --- | --- | --- | 0.243  | 1.183 | 5.54E-01 | 5.54E+01 |  |  |
| 7894152 | --- | --- | --- | 0.185  | 1.137 | 4.43E-01 | 4.43E+01 |  |  |
| 7894153 | --- | --- | --- | 0.213  | 1.159 | 5.51E-01 | 5.51E+01 |  |  |
| 7894154 | --- | --- | --- | 0.085  | 1.061 | 8.47E-01 | 8.47E+01 |  |  |
| 7894155 | --- | --- | --- | -0.005 | 0.996 | 9.89E-01 | 9.89E+01 |  |  |
| 7894156 | --- | --- | --- | -0.005 | 0.997 | 9.90E-01 | 9.90E+01 |  |  |
| 7894158 | --- | --- | --- | -0.049 | 0.967 | 8.13E-01 | 8.13E+01 |  |  |
| 7894159 | --- | --- | --- | 0.011  | 1.008 | 9.77E-01 | 9.77E+01 |  |  |
| 7894160 | --- | --- | --- | -0.144 | 0.905 | 5.19E-01 | 5.19E+01 |  |  |
| 7894161 | --- | --- | --- | -0.028 | 0.981 | 9.02E-01 | 9.02E+01 |  |  |
| 7894162 | --- | --- | --- | 0.097  | 1.069 | 8.98E-01 | 8.98E+01 |  |  |
| 7894163 | --- | --- | --- | 0.146  | 1.107 | 5.60E-01 | 5.60E+01 |  |  |
| 7894165 | --- | --- | --- | 0.105  | 1.075 | 8.09E-01 | 8.09E+01 |  |  |
| 7894167 | --- | --- | --- | -0.001 | 1.000 | 1.00E+00 | 1.00E+02 |  |  |
| 7894169 | --- | --- | --- | 0.098  | 1.070 | 7.89E-01 | 7.89E+01 |  |  |
| 7894170 | --- | --- | --- | 0.206  | 1.153 | 6.89E-01 | 6.89E+01 |  |  |
| 7894171 | --- | --- | --- | 0.017  | 1.012 | 9.49E-01 | 9.49E+01 |  |  |
| 7894173 | --- | --- | --- | -0.210 | 0.865 | 3.65E-01 | 3.65E+01 |  |  |
| 7894174 | --- | --- | --- | -0.126 | 0.917 | 5.81E-01 | 5.81E+01 |  |  |
| 7894176 | --- | --- | --- | 0.121  | 1.087 | 7.85E-01 | 7.85E+01 |  |  |
| 7894177 | --- | --- | --- | 0.071  | 1.051 | 7.49E-01 | 7.49E+01 |  |  |
| 7894178 | --- | --- | --- | 0.114  | 1.082 | 7.26E-01 | 7.26E+01 |  |  |
| 7894180 | --- | --- | --- | -0.197 | 0.873 | 5.79E-01 | 5.79E+01 |  |  |
| 7894181 | --- | --- | --- | 0.203  | 1.151 | 1.11E-01 | 1.11E+01 |  |  |
| 7894182 | --- | --- | --- | 0.143  | 1.104 | 6.00E-01 | 6.00E+01 |  |  |
| 7894183 | --- | --- | --- | -0.003 | 0.998 | 9.96E-01 | 9.96E+01 |  |  |
| 7894184 | --- | --- | --- | 0.031  | 1.022 | 9.65E-01 | 9.65E+01 |  |  |
| 7894185 | --- | --- | --- | 0.061  | 1.043 | 7.16E-01 | 7.16E+01 |  |  |
| 7894186 | --- | --- | --- | -0.039 | 0.973 | 8.78E-01 | 8.78E+01 |  |  |
| 7894188 | --- | --- | --- | 0.087  | 1.062 | 8.78E-01 | 8.78E+01 |  |  |
| 7894189 | --- | --- | --- | -0.144 | 0.905 | 4.02E-01 | 4.02E+01 |  |  |
| 7894191 | --- | --- | --- | -0.294 | 0.815 | 4.16E-01 | 4.16E+01 |  |  |
| 7894192 | --- | --- | --- | 0.038  | 1.027 | 7.49E-01 | 7.49E+01 |  |  |
| 7894193 | --- | --- | --- | 0.272  | 1.208 | 4.39E-01 | 4.39E+01 |  |  |
| 7894194 | --- | --- | --- | -0.171 | 0.888 | 6.11E-01 | 6.11E+01 |  |  |
| 7894195 | --- | --- | --- | 0.047  | 1.033 | 8.63E-01 | 8.63E+01 |  |  |
| 7894196 | --- | --- | --- | -0.110 | 0.926 | 8.62E-01 | 8.62E+01 |  |  |
| 7894200 | --- | --- | --- | 0.014  | 1.010 | 9.78E-01 | 9.78E+01 |  |  |
| 7894201 | --- | --- | --- | 0.034  | 1.024 | 9.61E-01 | 9.61E+01 |  |  |
| 7894202 | --- | --- | --- | 0.199  | 1.148 | 8.29E-01 | 8.29E+01 |  |  |
| 7894203 | --- | --- | --- | 0.244  | 1.185 | 5.70E-01 | 5.70E+01 |  |  |
| 7894204 | --- | --- | --- | -0.065 | 0.956 | 9.35E-01 | 9.35E+01 |  |  |
| 7894205 | --- | --- | --- | -0.010 | 0.993 | 9.65E-01 | 9.65E+01 |  |  |
| 7894207 | --- | --- | --- | 0.002  | 1.001 | 9.92E-01 | 9.92E+01 |  |  |
| 7894210 | --- | --- | --- | 0.150  | 1.110 | 7.09E-01 | 7.09E+01 |  |  |
| 7894211 | --- | --- | --- | 0.101  | 1.073 | 4.41E-01 | 4.41E+01 |  |  |
| 7894212 | --- | --- | --- | 0.160  | 1.117 | 3.91E-01 | 3.91E+01 |  |  |
| 7894213 | --- | --- | --- | -0.002 | 0.999 | 9.91E-01 | 9.91E+01 |  |  |
| 7894214 | --- | --- | --- | 0.019  | 1.013 | 8.96E-01 | 8.96E+01 |  |  |
| 7894215 | --- | --- | --- | 0.025  | 1.017 | 9.33E-01 | 9.33E+01 |  |  |
| 7894216 | --- | --- | --- | 0.155  | 1.114 | 7.37E-01 | 7.37E+01 |  |  |
| 7894217 | --- | --- | --- | -0.049 | 0.967 | 8.81E-01 | 8.81E+01 |  |  |
| 7894218 | --- | --- | --- | -0.081 | 0.945 | 3.89E-01 | 3.89E+01 |  |  |
| 7894219 | --- | --- | --- | -0.259 | 0.835 | 3.79E-01 | 3.79E+01 |  |  |

|         |     |     |     |        |       |          |          |  |  |
|---------|-----|-----|-----|--------|-------|----------|----------|--|--|
| 7894220 | --- | --- | --- | 0.169  | 1.125 | 6.04E-01 | 6.04E+01 |  |  |
| 7894221 | --- | --- | --- | 0.184  | 1.136 | 7.69E-01 | 7.69E+01 |  |  |
| 7894223 | --- | --- | --- | 0.030  | 1.021 | 8.33E-01 | 8.33E+01 |  |  |
| 7894224 | --- | --- | --- | -0.090 | 0.940 | 8.68E-01 | 8.68E+01 |  |  |
| 7894225 | --- | --- | --- | 0.086  | 1.061 | 7.75E-01 | 7.75E+01 |  |  |
| 7894226 | --- | --- | --- | -0.069 | 0.953 | 8.96E-01 | 8.96E+01 |  |  |
| 7894227 | --- | --- | --- | 0.291  | 1.223 | 5.96E-01 | 5.96E+01 |  |  |
| 7894229 | --- | --- | --- | -0.042 | 0.972 | 9.30E-01 | 9.30E+01 |  |  |
| 7894231 | --- | --- | --- | -0.054 | 0.963 | 8.71E-01 | 8.71E+01 |  |  |
| 7894232 | --- | --- | --- | 0.029  | 1.020 | 8.76E-01 | 8.76E+01 |  |  |
| 7894234 | --- | --- | --- | 0.181  | 1.133 | 4.43E-01 | 4.43E+01 |  |  |
| 7894235 | --- | --- | --- | 0.025  | 1.017 | 9.09E-01 | 9.09E+01 |  |  |
| 7894236 | --- | --- | --- | 0.034  | 1.024 | 5.56E-01 | 5.56E+01 |  |  |
| 7894237 | --- | --- | --- | -0.020 | 0.986 | 9.66E-01 | 9.66E+01 |  |  |
| 7894238 | --- | --- | --- | 0.602  | 1.518 | 2.95E-01 | 2.95E+01 |  |  |
| 7894239 | --- | --- | --- | -0.016 | 0.989 | 8.78E-01 | 8.78E+01 |  |  |
| 7894240 | --- | --- | --- | -0.256 | 0.838 | 6.67E-01 | 6.67E+01 |  |  |
| 7894242 | --- | --- | --- | -0.002 | 0.999 | 9.97E-01 | 9.97E+01 |  |  |
| 7894246 | --- | --- | --- | -0.031 | 0.979 | 9.14E-01 | 9.14E+01 |  |  |
| 7894247 | --- | --- | --- | 0.011  | 1.007 | 9.83E-01 | 9.83E+01 |  |  |
| 7894249 | --- | --- | --- | -0.002 | 0.999 | 9.95E-01 | 9.95E+01 |  |  |
| 7894251 | --- | --- | --- | 0.136  | 1.099 | 7.09E-01 | 7.09E+01 |  |  |
| 7894252 | --- | --- | --- | 0.143  | 1.104 | 2.21E-01 | 2.21E+01 |  |  |
| 7894254 | --- | --- | --- | 0.086  | 1.061 | 8.48E-01 | 8.48E+01 |  |  |
| 7894256 | --- | --- | --- | 0.031  | 1.021 | 8.68E-01 | 8.68E+01 |  |  |
| 7894257 | --- | --- | --- | 0.049  | 1.035 | 9.19E-01 | 9.19E+01 |  |  |
| 7894258 | --- | --- | --- | -0.046 | 0.969 | 8.38E-01 | 8.38E+01 |  |  |
| 7894262 | --- | --- | --- | -0.064 | 0.957 | 8.29E-01 | 8.29E+01 |  |  |
| 7894263 | --- | --- | --- | 0.009  | 1.006 | 9.37E-01 | 9.37E+01 |  |  |
| 7894264 | --- | --- | --- | 0.068  | 1.049 | 8.52E-01 | 8.52E+01 |  |  |
| 7894266 | --- | --- | --- | 0.020  | 1.014 | 9.33E-01 | 9.33E+01 |  |  |
| 7894267 | --- | --- | --- | 0.010  | 1.007 | 9.68E-01 | 9.68E+01 |  |  |
| 7894268 | --- | --- | --- | -0.348 | 0.785 | 5.03E-01 | 5.03E+01 |  |  |
| 7894269 | --- | --- | --- | 0.049  | 1.035 | 7.92E-01 | 7.92E+01 |  |  |
| 7894270 | --- | --- | --- | 0.387  | 1.308 | 5.53E-01 | 5.53E+01 |  |  |
| 7894271 | --- | --- | --- | -0.209 | 0.865 | 8.32E-01 | 8.32E+01 |  |  |
| 7894272 | --- | --- | --- | 0.196  | 1.145 | 5.49E-01 | 5.49E+01 |  |  |
| 7894273 | --- | --- | --- | 0.078  | 1.055 | 7.49E-01 | 7.49E+01 |  |  |
| 7894274 | --- | --- | --- | 0.226  | 1.169 | 3.75E-01 | 3.75E+01 |  |  |
| 7894276 | --- | --- | --- | 0.148  | 1.108 | 7.75E-01 | 7.75E+01 |  |  |
| 7894277 | --- | --- | --- | 0.013  | 1.009 | 9.77E-01 | 9.77E+01 |  |  |
| 7894278 | --- | --- | --- | 0.074  | 1.052 | 4.17E-01 | 4.17E+01 |  |  |
| 7894280 | --- | --- | --- | 0.148  | 1.108 | 8.25E-01 | 8.25E+01 |  |  |
| 7894281 | --- | --- | --- | 0.056  | 1.039 | 8.95E-01 | 8.95E+01 |  |  |
| 7894282 | --- | --- | --- | 0.098  | 1.070 | 3.72E-01 | 3.72E+01 |  |  |
| 7894283 | --- | --- | --- | 0.014  | 1.010 | 9.84E-01 | 9.84E+01 |  |  |
| 7894284 | --- | --- | --- | 0.112  | 1.080 | 5.41E-01 | 5.41E+01 |  |  |
| 7894285 | --- | --- | --- | 0.064  | 1.045 | 9.28E-01 | 9.28E+01 |  |  |
| 7894286 | --- | --- | --- | 0.155  | 1.114 | 5.98E-01 | 5.98E+01 |  |  |
| 7894288 | --- | --- | --- | 0.065  | 1.046 | 5.98E-01 | 5.98E+01 |  |  |
| 7894289 | --- | --- | --- | 0.229  | 1.172 | 1.14E-01 | 1.14E+01 |  |  |
| 7894290 | --- | --- | --- | -0.049 | 0.966 | 8.96E-01 | 8.96E+01 |  |  |
| 7894291 | --- | --- | --- | -0.167 | 0.891 | 3.18E-01 | 3.18E+01 |  |  |
| 7894292 | --- | --- | --- | 0.278  | 1.212 | 7.09E-01 | 7.09E+01 |  |  |
| 7894293 | --- | --- | --- | 0.008  | 1.006 | 9.80E-01 | 9.80E+01 |  |  |
| 7894294 | --- | --- | --- | -0.015 | 0.989 | 9.50E-01 | 9.50E+01 |  |  |
| 7894295 | --- | --- | --- | -0.017 | 0.988 | 9.58E-01 | 9.58E+01 |  |  |
| 7894296 | --- | --- | --- | -0.150 | 0.901 | 5.82E-01 | 5.82E+01 |  |  |
| 7894297 | --- | --- | --- | 0.208  | 1.155 | 5.34E-01 | 5.34E+01 |  |  |
| 7894298 | --- | --- | --- | 0.112  | 1.081 | 4.27E-01 | 4.27E+01 |  |  |
| 7894299 | --- | --- | --- | 0.007  | 1.005 | 9.81E-01 | 9.81E+01 |  |  |
| 7894300 | --- | --- | --- | 0.092  | 1.066 | 8.83E-01 | 8.83E+01 |  |  |
| 7894301 | --- | --- | --- | -0.174 | 0.887 | 5.04E-01 | 5.04E+01 |  |  |
| 7894303 | --- | --- | --- | -0.066 | 0.955 | 8.34E-01 | 8.34E+01 |  |  |
| 7894304 | --- | --- | --- | 0.108  | 1.077 | 5.81E-01 | 5.81E+01 |  |  |
| 7894305 | --- | --- | --- | -0.026 | 0.982 | 9.53E-01 | 9.53E+01 |  |  |
| 7894306 | --- | --- | --- | -0.054 | 0.964 | 7.98E-01 | 7.98E+01 |  |  |
| 7894307 | --- | --- | --- | -0.016 | 0.989 | 8.81E-01 | 8.81E+01 |  |  |
| 7894308 | --- | --- | --- | 0.047  | 1.033 | 7.51E-01 | 7.51E+01 |  |  |
| 7894309 | --- | --- | --- | 0.012  | 1.008 | 9.68E-01 | 9.68E+01 |  |  |
| 7894310 | --- | --- | --- | -0.117 | 0.922 | 9.19E-01 | 9.19E+01 |  |  |
| 7894312 | --- | --- | --- | -0.074 | 0.950 | 8.41E-01 | 8.41E+01 |  |  |
| 7894314 | --- | --- | --- | 0.074  | 1.053 | 8.84E-01 | 8.84E+01 |  |  |
| 7894315 | --- | --- | --- | 0.024  | 1.017 | 9.57E-01 | 9.57E+01 |  |  |
| 7894316 | --- | --- | --- | 0.027  | 1.019 | 9.52E-01 | 9.52E+01 |  |  |
| 7894318 | --- | --- | --- | 0.233  | 1.175 | 6.56E-01 | 6.56E+01 |  |  |
| 7894320 | --- | --- | --- | -0.038 | 0.974 | 7.82E-01 | 7.82E+01 |  |  |

|         |     |     |     |        |       |          |          |  |  |
|---------|-----|-----|-----|--------|-------|----------|----------|--|--|
| 7894321 | --- | --- | --- | 0.113  | 1.081 | 7.53E-01 | 7.53E+01 |  |  |
| 7894324 | --- | --- | --- | 0.041  | 1.029 | 8.34E-01 | 8.34E+01 |  |  |
| 7894328 | --- | --- | --- | -0.053 | 0.964 | 9.56E-01 | 9.56E+01 |  |  |
| 7894330 | --- | --- | --- | -0.094 | 0.937 | 9.30E-01 | 9.30E+01 |  |  |
| 7894331 | --- | --- | --- | 0.104  | 1.075 | 7.63E-01 | 7.63E+01 |  |  |
| 7894332 | --- | --- | --- | 0.332  | 1.259 | 4.37E-01 | 4.37E+01 |  |  |
| 7894336 | --- | --- | --- | 0.163  | 1.119 | 1.75E-01 | 1.75E+01 |  |  |
| 7894337 | --- | --- | --- | 0.130  | 1.095 | 3.86E-01 | 3.86E+01 |  |  |
| 7894341 | --- | --- | --- | 0.011  | 1.008 | 9.87E-01 | 9.87E+01 |  |  |
| 7894343 | --- | --- | --- | -0.207 | 0.867 | 3.18E-01 | 3.18E+01 |  |  |
| 7894345 | --- | --- | --- | -0.141 | 0.907 | 8.09E-01 | 8.09E+01 |  |  |
| 7894346 | --- | --- | --- | 0.131  | 1.095 | 5.14E-01 | 5.14E+01 |  |  |
| 7894350 | --- | --- | --- | -0.111 | 0.926 | 3.97E-01 | 3.97E+01 |  |  |
| 7894351 | --- | --- | --- | 0.033  | 1.023 | 9.44E-01 | 9.44E+01 |  |  |
| 7894352 | --- | --- | --- | -0.129 | 0.915 | 5.95E-01 | 5.95E+01 |  |  |
| 7894354 | --- | --- | --- | 0.273  | 1.208 | 6.25E-01 | 6.25E+01 |  |  |
| 7894355 | --- | --- | --- | 0.154  | 1.113 | 5.82E-01 | 5.82E+01 |  |  |
| 7894356 | --- | --- | --- | 0.089  | 1.064 | 7.89E-01 | 7.89E+01 |  |  |
| 7894360 | --- | --- | --- | 0.023  | 1.016 | 9.72E-01 | 9.72E+01 |  |  |
| 7894361 | --- | --- | --- | 0.137  | 1.099 | 4.48E-01 | 4.48E+01 |  |  |
| 7894362 | --- | --- | --- | -0.168 | 0.890 | 8.25E-01 | 8.25E+01 |  |  |
| 7894363 | --- | --- | --- | -0.470 | 0.722 | 6.33E-01 | 6.33E+01 |  |  |
| 7894364 | --- | --- | --- | 0.067  | 1.047 | 9.18E-01 | 9.18E+01 |  |  |
| 7894366 | --- | --- | --- | -0.090 | 0.939 | 5.60E-01 | 5.60E+01 |  |  |
| 7894367 | --- | --- | --- | 0.035  | 1.024 | 8.04E-01 | 8.04E+01 |  |  |
| 7894369 | --- | --- | --- | -0.048 | 0.968 | 7.53E-01 | 7.53E+01 |  |  |
| 7894370 | --- | --- | --- | 0.080  | 1.057 | 9.09E-01 | 9.09E+01 |  |  |
| 7894371 | --- | --- | --- | -0.025 | 0.983 | 9.57E-01 | 9.57E+01 |  |  |
| 7894372 | --- | --- | --- | -0.006 | 0.996 | 9.73E-01 | 9.73E+01 |  |  |
| 7894373 | --- | --- | --- | -0.051 | 0.965 | 8.62E-01 | 8.62E+01 |  |  |
| 7894374 | --- | --- | --- | -0.155 | 0.898 | 6.05E-01 | 6.05E+01 |  |  |
| 7894375 | --- | --- | --- | 0.079  | 1.056 | 6.33E-01 | 6.33E+01 |  |  |
| 7894376 | --- | --- | --- | 0.013  | 1.009 | 9.18E-01 | 9.18E+01 |  |  |
| 7894377 | --- | --- | --- | 0.220  | 1.165 | 7.92E-01 | 7.92E+01 |  |  |
| 7894379 | --- | --- | --- | 0.131  | 1.095 | 4.56E-01 | 4.56E+01 |  |  |
| 7894380 | --- | --- | --- | -0.049 | 0.967 | 7.20E-01 | 7.20E+01 |  |  |
| 7894381 | --- | --- | --- | -0.265 | 0.832 | 7.74E-01 | 7.74E+01 |  |  |
| 7894382 | --- | --- | --- | 0.038  | 1.027 | 7.05E-01 | 7.05E+01 |  |  |
| 7894383 | --- | --- | --- | 0.053  | 1.038 | 9.53E-01 | 9.53E+01 |  |  |
| 7894384 | --- | --- | --- | 0.036  | 1.025 | 9.37E-01 | 9.37E+01 |  |  |
| 7894385 | --- | --- | --- | 0.134  | 1.097 | 7.72E-01 | 7.72E+01 |  |  |
| 7894386 | --- | --- | --- | 0.044  | 1.031 | 8.05E-01 | 8.05E+01 |  |  |
| 7894387 | --- | --- | --- | 0.037  | 1.026 | 9.77E-01 | 9.77E+01 |  |  |
| 7894388 | --- | --- | --- | -0.086 | 0.942 | 7.48E-01 | 7.48E+01 |  |  |
| 7894389 | --- | --- | --- | 0.088  | 1.063 | 7.13E-01 | 7.13E+01 |  |  |
| 7894391 | --- | --- | --- | -0.167 | 0.891 | 5.95E-01 | 5.95E+01 |  |  |
| 7894392 | --- | --- | --- | 0.035  | 1.024 | 7.97E-01 | 7.97E+01 |  |  |
| 7894395 | --- | --- | --- | 0.242  | 1.183 | 1.18E-02 | 1.18E+00 |  |  |
| 7894396 | --- | --- | --- | -0.007 | 0.995 | 9.90E-01 | 9.90E+01 |  |  |
| 7894398 | --- | --- | --- | 0.121  | 1.088 | 9.00E-01 | 9.00E+01 |  |  |
| 7894399 | --- | --- | --- | -0.006 | 0.996 | 9.85E-01 | 9.85E+01 |  |  |
| 7894400 | --- | --- | --- | 0.053  | 1.037 | 8.54E-01 | 8.54E+01 |  |  |
| 7894402 | --- | --- | --- | 0.028  | 1.020 | 9.00E-01 | 9.00E+01 |  |  |
| 7894403 | --- | --- | --- | -0.085 | 0.943 | 8.10E-01 | 8.10E+01 |  |  |
| 7894404 | --- | --- | --- | 0.002  | 1.001 | 9.87E-01 | 9.87E+01 |  |  |
| 7894405 | --- | --- | --- | 0.144  | 1.105 | 6.98E-01 | 6.98E+01 |  |  |
| 7894406 | --- | --- | --- | 0.008  | 1.006 | 9.56E-01 | 9.56E+01 |  |  |
| 7894408 | --- | --- | --- | 0.028  | 1.019 | 9.77E-01 | 9.77E+01 |  |  |
| 7894409 | --- | --- | --- | 0.052  | 1.037 | 9.30E-01 | 9.30E+01 |  |  |
| 7894411 | --- | --- | --- | 0.144  | 1.105 | 2.66E-01 | 2.66E+01 |  |  |
| 7894412 | --- | --- | --- | -0.138 | 0.909 | 4.01E-01 | 4.01E+01 |  |  |
| 7894413 | --- | --- | --- | 0.055  | 1.039 | 7.99E-01 | 7.99E+01 |  |  |
| 7894415 | --- | --- | --- | 0.245  | 1.185 | 7.45E-01 | 7.45E+01 |  |  |
| 7894416 | --- | --- | --- | -0.072 | 0.951 | 8.18E-01 | 8.18E+01 |  |  |
| 7894418 | --- | --- | --- | 0.031  | 1.022 | 8.52E-01 | 8.52E+01 |  |  |
| 7894419 | --- | --- | --- | -0.057 | 0.961 | 8.75E-01 | 8.75E+01 |  |  |
| 7894420 | --- | --- | --- | 0.036  | 1.025 | 9.53E-01 | 9.53E+01 |  |  |
| 7894421 | --- | --- | --- | -0.055 | 0.963 | 7.73E-01 | 7.73E+01 |  |  |
| 7894422 | --- | --- | --- | 0.012  | 1.008 | 9.85E-01 | 9.85E+01 |  |  |
| 7894427 | --- | --- | --- | -0.095 | 0.936 | 8.11E-01 | 8.11E+01 |  |  |
| 7894428 | --- | --- | --- | -0.015 | 0.990 | 9.65E-01 | 9.65E+01 |  |  |
| 7894429 | --- | --- | --- | -0.063 | 0.957 | 8.74E-01 | 8.74E+01 |  |  |
| 7894430 | --- | --- | --- | 0.209  | 1.156 | 7.52E-01 | 7.52E+01 |  |  |
| 7894431 | --- | --- | --- | -0.079 | 0.947 | 7.50E-01 | 7.50E+01 |  |  |
| 7894432 | --- | --- | --- | -0.022 | 0.985 | 9.49E-01 | 9.49E+01 |  |  |
| 7894433 | --- | --- | --- | 0.074  | 1.053 | 8.03E-01 | 8.03E+01 |  |  |
| 7894434 | --- | --- | --- | 0.082  | 1.059 | 6.11E-01 | 6.11E+01 |  |  |



|         |     |     |     |        |       |          |          |  |  |
|---------|-----|-----|-----|--------|-------|----------|----------|--|--|
| 7894435 | --- | --- | --- | 0.009  | 1.006 | 9.83E-01 | 9.83E+01 |  |  |
| 7894436 | --- | --- | --- | -0.057 | 0.961 | 8.77E-01 | 8.77E+01 |  |  |
| 7894438 | --- | --- | --- | -0.130 | 0.914 | 6.71E-01 | 6.71E+01 |  |  |
| 7894439 | --- | --- | --- | 0.025  | 1.017 | 8.27E-01 | 8.27E+01 |  |  |
| 7894440 | --- | --- | --- | 0.201  | 1.149 | 7.35E-01 | 7.35E+01 |  |  |
| 7894442 | --- | --- | --- | 0.201  | 1.150 | 6.78E-01 | 6.78E+01 |  |  |
| 7894443 | --- | --- | --- | 0.063  | 1.045 | 8.14E-01 | 8.14E+01 |  |  |
| 7894444 | --- | --- | --- | 0.054  | 1.038 | 6.66E-01 | 6.66E+01 |  |  |
| 7894445 | --- | --- | --- | 0.267  | 1.204 | 2.66E-01 | 2.66E+01 |  |  |
| 7894446 | --- | --- | --- | 0.162  | 1.118 | 5.71E-01 | 5.71E+01 |  |  |
| 7894447 | --- | --- | --- | 0.031  | 1.022 | 8.80E-01 | 8.80E+01 |  |  |
| 7894449 | --- | --- | --- | -0.024 | 0.983 | 9.24E-01 | 9.24E+01 |  |  |
| 7894451 | --- | --- | --- | -0.161 | 0.894 | 3.29E-01 | 3.29E+01 |  |  |
| 7894452 | --- | --- | --- | 0.205  | 1.153 | 5.99E-01 | 5.99E+01 |  |  |
| 7894453 | --- | --- | --- | 0.130  | 1.095 | 6.06E-01 | 6.06E+01 |  |  |
| 7894454 | --- | --- | --- | -0.118 | 0.921 | 8.22E-01 | 8.22E+01 |  |  |
| 7894456 | --- | --- | --- | 0.090  | 1.064 | 4.14E-01 | 4.14E+01 |  |  |
| 7894457 | --- | --- | --- | -0.163 | 0.893 | 7.45E-01 | 7.45E+01 |  |  |
| 7894459 | --- | --- | --- | 0.146  | 1.107 | 6.05E-01 | 6.05E+01 |  |  |
| 7894460 | --- | --- | --- | 0.033  | 1.023 | 7.64E-01 | 7.64E+01 |  |  |
| 7894461 | --- | --- | --- | 0.008  | 1.006 | 9.83E-01 | 9.83E+01 |  |  |
| 7894462 | --- | --- | --- | -0.256 | 0.837 | 3.66E-01 | 3.66E+01 |  |  |
| 7894464 | --- | --- | --- | 0.074  | 1.053 | 7.33E-01 | 7.33E+01 |  |  |
| 7894465 | --- | --- | --- | -0.127 | 0.916 | 8.75E-01 | 8.75E+01 |  |  |
| 7894466 | --- | --- | --- | -0.105 | 0.930 | 7.52E-01 | 7.52E+01 |  |  |
| 7894467 | --- | --- | --- | -0.014 | 0.990 | 9.76E-01 | 9.76E+01 |  |  |
| 7894469 | --- | --- | --- | -0.064 | 0.957 | 7.03E-01 | 7.03E+01 |  |  |
| 7894470 | --- | --- | --- | -0.173 | 0.887 | 1.06E-01 | 1.06E+01 |  |  |
| 7894471 | --- | --- | --- | 0.036  | 1.025 | 6.69E-01 | 6.69E+01 |  |  |
| 7894473 | --- | --- | --- | 0.227  | 1.171 | 7.22E-01 | 7.22E+01 |  |  |
| 7894474 | --- | --- | --- | 0.029  | 1.021 | 8.95E-01 | 8.95E+01 |  |  |
| 7894475 | --- | --- | --- | 0.047  | 1.033 | 8.07E-01 | 8.07E+01 |  |  |
| 7894476 | --- | --- | --- | -0.049 | 0.967 | 8.63E-01 | 8.63E+01 |  |  |
| 7894478 | --- | --- | --- | 0.075  | 1.053 | 6.73E-01 | 6.73E+01 |  |  |
| 7894479 | --- | --- | --- | 0.106  | 1.076 | 8.08E-01 | 8.08E+01 |  |  |
| 7894480 | --- | --- | --- | -0.050 | 0.966 | 7.38E-01 | 7.38E+01 |  |  |
| 7894481 | --- | --- | --- | 0.015  | 1.011 | 9.07E-01 | 9.07E+01 |  |  |
| 7894483 | --- | --- | --- | -0.085 | 0.943 | 8.56E-01 | 8.56E+01 |  |  |
| 7894484 | --- | --- | --- | -0.077 | 0.948 | 8.01E-01 | 8.01E+01 |  |  |
| 7894485 | --- | --- | --- | 0.027  | 1.019 | 7.17E-01 | 7.17E+01 |  |  |
| 7894486 | --- | --- | --- | -0.221 | 0.858 | 5.34E-01 | 5.34E+01 |  |  |
| 7894489 | --- | --- | --- | -0.030 | 0.980 | 9.23E-01 | 9.23E+01 |  |  |
| 7894490 | --- | --- | --- | 0.084  | 1.060 | 6.09E-01 | 6.09E+01 |  |  |
| 7894491 | --- | --- | --- | -0.075 | 0.949 | 9.23E-01 | 9.23E+01 |  |  |
| 7894492 | --- | --- | --- | -0.046 | 0.969 | 8.08E-01 | 8.08E+01 |  |  |
| 7894493 | --- | --- | --- | 0.128  | 1.093 | 4.84E-01 | 4.84E+01 |  |  |
| 7894494 | --- | --- | --- | -0.026 | 0.982 | 9.64E-01 | 9.64E+01 |  |  |
| 7894495 | --- | --- | --- | 0.044  | 1.031 | 7.97E-01 | 7.97E+01 |  |  |
| 7894496 | --- | --- | --- | 0.072  | 1.051 | 7.40E-01 | 7.40E+01 |  |  |
| 7894497 | --- | --- | --- | -0.013 | 0.991 | 9.85E-01 | 9.85E+01 |  |  |
| 7894498 | --- | --- | --- | -0.094 | 0.937 | 6.38E-01 | 6.38E+01 |  |  |
| 7894499 | --- | --- | --- | 0.010  | 1.007 | 9.58E-01 | 9.58E+01 |  |  |
| 7894501 | --- | --- | --- | 0.144  | 1.105 | 2.42E-01 | 2.42E+01 |  |  |
| 7894503 | --- | --- | --- | -0.042 | 0.972 | 8.62E-01 | 8.62E+01 |  |  |
| 7894504 | --- | --- | --- | -0.037 | 0.974 | 8.62E-01 | 8.62E+01 |  |  |
| 7894505 | --- | --- | --- | 0.241  | 1.181 | 4.82E-01 | 4.82E+01 |  |  |
| 7894506 | --- | --- | --- | -0.128 | 0.915 | 6.89E-01 | 6.89E+01 |  |  |
| 7894508 | --- | --- | --- | -0.084 | 0.943 | 9.11E-01 | 9.11E+01 |  |  |
| 7894509 | --- | --- | --- | 0.076  | 1.054 | 8.56E-01 | 8.56E+01 |  |  |
| 7894510 | --- | --- | --- | 0.075  | 1.053 | 9.44E-01 | 9.44E+01 |  |  |
| 7894511 | --- | --- | --- | -0.030 | 0.979 | 9.50E-01 | 9.50E+01 |  |  |
| 7894512 | --- | --- | --- | -0.139 | 0.908 | 6.91E-01 | 6.91E+01 |  |  |
| 7894513 | --- | --- | --- | -0.039 | 0.973 | 9.17E-01 | 9.17E+01 |  |  |
| 7894515 | --- | --- | --- | 0.169  | 1.124 | 2.35E-01 | 2.35E+01 |  |  |
| 7894516 | --- | --- | --- | 0.005  | 1.003 | 9.86E-01 | 9.86E+01 |  |  |
| 7894517 | --- | --- | --- | -0.041 | 0.972 | 9.54E-01 | 9.54E+01 |  |  |
| 7894518 | --- | --- | --- | -0.018 | 0.987 | 9.18E-01 | 9.18E+01 |  |  |
| 7894519 | --- | --- | --- | -0.032 | 0.978 | 8.82E-01 | 8.82E+01 |  |  |
| 7894520 | --- | --- | --- | 0.122  | 1.089 | 4.36E-01 | 4.36E+01 |  |  |
| 7894522 | --- | --- | --- | 0.042  | 1.030 | 6.97E-01 | 6.97E+01 |  |  |
| 7894523 | --- | --- | --- | -0.031 | 0.979 | 8.64E-01 | 8.64E+01 |  |  |
| 7894525 | --- | --- | --- | 0.311  | 1.240 | 2.95E-02 | 2.95E+00 |  |  |
| 7894526 | --- | --- | --- | -0.038 | 0.974 | 9.12E-01 | 9.12E+01 |  |  |
| 7894527 | --- | --- | --- | 0.100  | 1.072 | 4.25E-01 | 4.25E+01 |  |  |
| 7894531 | --- | --- | --- | -0.321 | 0.801 | 2.95E-01 | 2.95E+01 |  |  |
| 7894532 | --- | --- | --- | 0.118  | 1.085 | 9.01E-01 | 9.01E+01 |  |  |
| 7894535 | --- | --- | --- | 0.017  | 1.012 | 8.69E-01 | 8.69E+01 |  |  |

|         |     |     |     |        |       |          |          |  |  |
|---------|-----|-----|-----|--------|-------|----------|----------|--|--|
| 7894536 | --- | --- | --- | 0.032  | 1.022 | 8.54E-01 | 8.54E+01 |  |  |
| 7894537 | --- | --- | --- | -0.239 | 0.848 | 2.06E-01 | 2.06E+01 |  |  |
| 7894538 | --- | --- | --- | 0.139  | 1.101 | 6.93E-01 | 6.93E+01 |  |  |
| 7894540 | --- | --- | --- | 0.017  | 1.012 | 8.63E-01 | 8.63E+01 |  |  |
| 7894542 | --- | --- | --- | -0.004 | 0.997 | 9.89E-01 | 9.89E+01 |  |  |
| 7894543 | --- | --- | --- | 0.014  | 1.010 | 9.86E-01 | 9.86E+01 |  |  |
| 7894544 | --- | --- | --- | -0.022 | 0.985 | 9.76E-01 | 9.76E+01 |  |  |
| 7894546 | --- | --- | --- | 0.008  | 1.006 | 9.81E-01 | 9.81E+01 |  |  |
| 7894547 | --- | --- | --- | 0.142  | 1.103 | 7.23E-01 | 7.23E+01 |  |  |
| 7894548 | --- | --- | --- | -0.094 | 0.937 | 3.95E-01 | 3.95E+01 |  |  |
| 7894550 | --- | --- | --- | 0.034  | 1.024 | 8.52E-01 | 8.52E+01 |  |  |
| 7894551 | --- | --- | --- | 0.030  | 1.021 | 9.20E-01 | 9.20E+01 |  |  |
| 7894552 | --- | --- | --- | 0.068  | 1.049 | 6.65E-01 | 6.65E+01 |  |  |
| 7894555 | --- | --- | --- | -0.102 | 0.932 | 6.42E-01 | 6.42E+01 |  |  |
| 7894556 | --- | --- | --- | 0.082  | 1.058 | 5.82E-01 | 5.82E+01 |  |  |
| 7894557 | --- | --- | --- | -0.114 | 0.924 | 3.41E-01 | 3.41E+01 |  |  |
| 7894558 | --- | --- | --- | -0.079 | 0.947 | 6.38E-01 | 6.38E+01 |  |  |
| 7894560 | --- | --- | --- | -0.162 | 0.894 | 7.55E-01 | 7.55E+01 |  |  |
| 7894561 | --- | --- | --- | 0.044  | 1.031 | 8.43E-01 | 8.43E+01 |  |  |
| 7894562 | --- | --- | --- | 0.354  | 1.278 | 2.56E-01 | 2.56E+01 |  |  |
| 7894563 | --- | --- | --- | 0.149  | 1.109 | 4.47E-01 | 4.47E+01 |  |  |
| 7894565 | --- | --- | --- | -0.053 | 0.964 | 8.77E-01 | 8.77E+01 |  |  |
| 7894566 | --- | --- | --- | 0.209  | 1.156 | 4.29E-01 | 4.29E+01 |  |  |
| 7894568 | --- | --- | --- | -0.011 | 0.992 | 9.81E-01 | 9.81E+01 |  |  |
| 7894569 | --- | --- | --- | 0.271  | 1.207 | 4.28E-01 | 4.28E+01 |  |  |
| 7894570 | --- | --- | --- | -0.115 | 0.923 | 8.08E-01 | 8.08E+01 |  |  |
| 7894571 | --- | --- | --- | -0.034 | 0.977 | 9.53E-01 | 9.53E+01 |  |  |
| 7894573 | --- | --- | --- | 0.076  | 1.054 | 7.41E-01 | 7.41E+01 |  |  |
| 7894574 | --- | --- | --- | 0.163  | 1.120 | 5.41E-01 | 5.41E+01 |  |  |
| 7894575 | --- | --- | --- | -0.030 | 0.979 | 9.53E-01 | 9.53E+01 |  |  |
| 7894577 | --- | --- | --- | 0.105  | 1.075 | 5.48E-01 | 5.48E+01 |  |  |
| 7894578 | --- | --- | --- | -0.039 | 0.973 | 6.93E-01 | 6.93E+01 |  |  |
| 7894579 | --- | --- | --- | 0.007  | 1.005 | 9.83E-01 | 9.83E+01 |  |  |
| 7894581 | --- | --- | --- | -0.119 | 0.921 | 5.55E-01 | 5.55E+01 |  |  |
| 7894582 | --- | --- | --- | -0.240 | 0.847 | 5.63E-01 | 5.63E+01 |  |  |
| 7894583 | --- | --- | --- | 0.014  | 1.010 | 9.68E-01 | 9.68E+01 |  |  |
| 7894584 | --- | --- | --- | -0.024 | 0.984 | 9.47E-01 | 9.47E+01 |  |  |
| 7894590 | --- | --- | --- | 0.128  | 1.093 | 8.97E-01 | 8.97E+01 |  |  |
| 7894592 | --- | --- | --- | -0.051 | 0.965 | 6.99E-01 | 6.99E+01 |  |  |
| 7894595 | --- | --- | --- | 0.008  | 1.006 | 9.82E-01 | 9.82E+01 |  |  |
| 7894596 | --- | --- | --- | 0.024  | 1.017 | 9.51E-01 | 9.51E+01 |  |  |
| 7894597 | --- | --- | --- | 0.064  | 1.045 | 8.16E-01 | 8.16E+01 |  |  |
| 7894598 | --- | --- | --- | -0.095 | 0.936 | 8.63E-01 | 8.63E+01 |  |  |
| 7894599 | --- | --- | --- | 0.046  | 1.033 | 8.32E-01 | 8.32E+01 |  |  |
| 7894600 | --- | --- | --- | -0.276 | 0.826 | 7.50E-01 | 7.50E+01 |  |  |
| 7894601 | --- | --- | --- | -0.223 | 0.857 | 6.08E-01 | 6.08E+01 |  |  |
| 7894604 | --- | --- | --- | -0.074 | 0.950 | 6.66E-01 | 6.66E+01 |  |  |
| 7894605 | --- | --- | --- | -0.024 | 0.984 | 8.76E-01 | 8.76E+01 |  |  |
| 7894606 | --- | --- | --- | -0.002 | 0.999 | 9.98E-01 | 9.98E+01 |  |  |
| 7894607 | --- | --- | --- | 0.121  | 1.087 | 6.85E-01 | 6.85E+01 |  |  |
| 7894609 | --- | --- | --- | 0.044  | 1.031 | 8.10E-01 | 8.10E+01 |  |  |
| 7894610 | --- | --- | --- | -0.060 | 0.960 | 7.95E-01 | 7.95E+01 |  |  |
| 7894611 | --- | --- | --- | 0.006  | 1.004 | 9.65E-01 | 9.65E+01 |  |  |
| 7894612 | --- | --- | --- | 0.048  | 1.034 | 7.03E-01 | 7.03E+01 |  |  |
| 7894613 | --- | --- | --- | 0.052  | 1.036 | 7.51E-01 | 7.51E+01 |  |  |
| 7894614 | --- | --- | --- | 0.096  | 1.069 | 8.91E-01 | 8.91E+01 |  |  |
| 7894617 | --- | --- | --- | -0.076 | 0.949 | 5.42E-01 | 5.42E+01 |  |  |
| 7894619 | --- | --- | --- | 0.083  | 1.059 | 9.05E-01 | 9.05E+01 |  |  |
| 7894620 | --- | --- | --- | -0.031 | 0.979 | 9.57E-01 | 9.57E+01 |  |  |
| 7894621 | --- | --- | --- | 0.008  | 1.006 | 9.74E-01 | 9.74E+01 |  |  |
| 7894623 | --- | --- | --- | 0.355  | 1.279 | 2.84E-01 | 2.84E+01 |  |  |
| 7894624 | --- | --- | --- | 0.003  | 1.002 | 9.91E-01 | 9.91E+01 |  |  |
| 7894626 | --- | --- | --- | 0.012  | 1.008 | 9.57E-01 | 9.57E+01 |  |  |
| 7894628 | --- | --- | --- | 0.032  | 1.022 | 9.63E-01 | 9.63E+01 |  |  |
| 7894632 | --- | --- | --- | 0.112  | 1.081 | 6.04E-01 | 6.04E+01 |  |  |
| 7894633 | --- | --- | --- | 0.045  | 1.032 | 8.52E-01 | 8.52E+01 |  |  |
| 7894634 | --- | --- | --- | -0.006 | 0.996 | 9.77E-01 | 9.77E+01 |  |  |
| 7894635 | --- | --- | --- | -0.055 | 0.963 | 8.79E-01 | 8.79E+01 |  |  |
| 7894637 | --- | --- | --- | -0.006 | 0.996 | 9.89E-01 | 9.89E+01 |  |  |
| 7894638 | --- | --- | --- | -0.023 | 0.984 | 9.50E-01 | 9.50E+01 |  |  |
| 7894639 | --- | --- | --- | 0.120  | 1.087 | 8.57E-01 | 8.57E+01 |  |  |
| 7894640 | --- | --- | --- | 0.031  | 1.021 | 7.68E-01 | 7.68E+01 |  |  |
| 7894641 | --- | --- | --- | -0.115 | 0.924 | 8.38E-01 | 8.38E+01 |  |  |
| 7894642 | --- | --- | --- | 0.054  | 1.038 | 7.36E-01 | 7.36E+01 |  |  |
| 7894644 | --- | --- | --- | 0.155  | 1.113 | 4.43E-01 | 4.43E+01 |  |  |
| 7894645 | --- | --- | --- | 0.050  | 1.035 | 7.54E-01 | 7.54E+01 |  |  |
| 7894647 | --- | --- | --- | 0.056  | 1.040 | 3.71E-01 | 3.71E+01 |  |  |

|         |     |     |     |        |       |          |          |  |  |
|---------|-----|-----|-----|--------|-------|----------|----------|--|--|
| 7894648 | --- | --- | --- | 0.210  | 1.157 | 5.63E-01 | 5.63E+01 |  |  |
| 7894649 | --- | --- | --- | 0.212  | 1.158 | 5.55E-01 | 5.55E+01 |  |  |
| 7894650 | --- | --- | --- | -0.140 | 0.907 | 8.29E-01 | 8.29E+01 |  |  |
| 7894652 | --- | --- | --- | -0.152 | 0.900 | 7.13E-01 | 7.13E+01 |  |  |
| 7894653 | --- | --- | --- | 0.030  | 1.021 | 7.56E-01 | 7.56E+01 |  |  |
| 7894654 | --- | --- | --- | 0.167  | 1.123 | 8.03E-01 | 8.03E+01 |  |  |
| 7894655 | --- | --- | --- | 0.003  | 1.002 | 9.95E-01 | 9.95E+01 |  |  |
| 7894656 | --- | --- | --- | 0.301  | 1.232 | 2.98E-01 | 2.98E+01 |  |  |
| 7894657 | --- | --- | --- | -0.083 | 0.944 | 8.17E-01 | 8.17E+01 |  |  |
| 7894658 | --- | --- | --- | -0.033 | 0.978 | 9.63E-01 | 9.63E+01 |  |  |
| 7894661 | --- | --- | --- | 0.111  | 1.080 | 4.02E-01 | 4.02E+01 |  |  |
| 7894662 | --- | --- | --- | -0.135 | 0.911 | 7.02E-01 | 7.02E+01 |  |  |
| 7894664 | --- | --- | --- | 0.133  | 1.097 | 7.53E-01 | 7.53E+01 |  |  |
| 7894665 | --- | --- | --- | 0.071  | 1.050 | 7.53E-01 | 7.53E+01 |  |  |
| 7894666 | --- | --- | --- | -0.075 | 0.949 | 5.43E-01 | 5.43E+01 |  |  |
| 7894668 | --- | --- | --- | 0.133  | 1.096 | 5.04E-01 | 5.04E+01 |  |  |
| 7894669 | --- | --- | --- | -0.193 | 0.875 | 7.58E-01 | 7.58E+01 |  |  |
| 7894670 | --- | --- | --- | 0.066  | 1.047 | 8.91E-01 | 8.91E+01 |  |  |
| 7894671 | --- | --- | --- | 0.033  | 1.023 | 9.00E-01 | 9.00E+01 |  |  |
| 7894672 | --- | --- | --- | 0.010  | 1.007 | 9.77E-01 | 9.77E+01 |  |  |
| 7894673 | --- | --- | --- | -0.146 | 0.903 | 5.93E-01 | 5.93E+01 |  |  |
| 7894674 | --- | --- | --- | 0.068  | 1.049 | 6.09E-01 | 6.09E+01 |  |  |
| 7894675 | --- | --- | --- | -0.089 | 0.940 | 4.25E-01 | 4.25E+01 |  |  |
| 7894676 | --- | --- | --- | 0.162  | 1.119 | 8.55E-01 | 8.55E+01 |  |  |
| 7894678 | --- | --- | --- | 0.015  | 1.010 | 9.69E-01 | 9.69E+01 |  |  |
| 7894679 | --- | --- | --- | 0.107  | 1.077 | 8.04E-01 | 8.04E+01 |  |  |
| 7894680 | --- | --- | --- | 0.210  | 1.157 | 1.39E-01 | 1.39E+01 |  |  |
| 7894681 | --- | --- | --- | -0.104 | 0.930 | 1.53E-01 | 1.53E+01 |  |  |
| 7894682 | --- | --- | --- | 0.003  | 1.002 | 9.87E-01 | 9.87E+01 |  |  |
| 7894683 | --- | --- | --- | 0.048  | 1.034 | 9.50E-01 | 9.50E+01 |  |  |
| 7894685 | --- | --- | --- | -0.027 | 0.981 | 9.12E-01 | 9.12E+01 |  |  |
| 7894687 | --- | --- | --- | 0.087  | 1.062 | 3.95E-01 | 3.95E+01 |  |  |
| 7894688 | --- | --- | --- | -0.136 | 0.910 | 7.52E-01 | 7.52E+01 |  |  |
| 7894689 | --- | --- | --- | -0.081 | 0.946 | 7.99E-01 | 7.99E+01 |  |  |
| 7894691 | --- | --- | --- | 0.094  | 1.067 | 8.48E-01 | 8.48E+01 |  |  |
| 7894692 | --- | --- | --- | 0.033  | 1.023 | 9.64E-01 | 9.64E+01 |  |  |
| 7894693 | --- | --- | --- | 0.061  | 1.043 | 8.88E-01 | 8.88E+01 |  |  |
| 7894694 | --- | --- | --- | 0.096  | 1.069 | 8.00E-01 | 8.00E+01 |  |  |
| 7894696 | --- | --- | --- | -0.001 | 1.000 | 9.98E-01 | 9.98E+01 |  |  |
| 7894697 | --- | --- | --- | -0.066 | 0.955 | 7.77E-01 | 7.77E+01 |  |  |
| 7894698 | --- | --- | --- | 0.069  | 1.049 | 8.47E-01 | 8.47E+01 |  |  |
| 7894699 | --- | --- | --- | -0.023 | 0.984 | 9.54E-01 | 9.54E+01 |  |  |
| 7894700 | --- | --- | --- | 0.086  | 1.061 | 5.72E-01 | 5.72E+01 |  |  |
| 7894704 | --- | --- | --- | 0.118  | 1.085 | 7.56E-01 | 7.56E+01 |  |  |
| 7894706 | --- | --- | --- | 0.091  | 1.065 | 7.89E-01 | 7.89E+01 |  |  |
| 7894707 | --- | --- | --- | 0.034  | 1.024 | 9.12E-01 | 9.12E+01 |  |  |
| 7894708 | --- | --- | --- | -0.092 | 0.938 | 5.90E-01 | 5.90E+01 |  |  |
| 7894709 | --- | --- | --- | 0.042  | 1.030 | 8.73E-01 | 8.73E+01 |  |  |
| 7894711 | --- | --- | --- | 0.037  | 1.026 | 8.94E-01 | 8.94E+01 |  |  |
| 7894712 | --- | --- | --- | -0.063 | 0.957 | 8.26E-01 | 8.26E+01 |  |  |
| 7894714 | --- | --- | --- | -0.009 | 0.994 | 9.83E-01 | 9.83E+01 |  |  |
| 7894716 | --- | --- | --- | 0.073  | 1.052 | 6.23E-01 | 6.23E+01 |  |  |
| 7894717 | --- | --- | --- | -0.018 | 0.987 | 9.76E-01 | 9.76E+01 |  |  |
| 7894719 | --- | --- | --- | 0.061  | 1.043 | 8.79E-01 | 8.79E+01 |  |  |
| 7894720 | --- | --- | --- | 0.131  | 1.095 | 6.16E-01 | 6.16E+01 |  |  |
| 7894722 | --- | --- | --- | -0.001 | 1.000 | 9.98E-01 | 9.98E+01 |  |  |
| 7894723 | --- | --- | --- | -0.013 | 0.991 | 9.44E-01 | 9.44E+01 |  |  |
| 7894725 | --- | --- | --- | 0.120  | 1.087 | 5.29E-01 | 5.29E+01 |  |  |
| 7894727 | --- | --- | --- | 0.119  | 1.086 | 6.05E-01 | 6.05E+01 |  |  |
| 7894729 | --- | --- | --- | 0.098  | 1.070 | 8.52E-01 | 8.52E+01 |  |  |
| 7894732 | --- | --- | --- | -0.043 | 0.971 | 9.25E-01 | 9.25E+01 |  |  |
| 7894733 | --- | --- | --- | -0.047 | 0.968 | 8.69E-01 | 8.69E+01 |  |  |
| 7894734 | --- | --- | --- | 0.109  | 1.078 | 5.51E-01 | 5.51E+01 |  |  |
| 7894736 | --- | --- | --- | 0.073  | 1.052 | 9.13E-01 | 9.13E+01 |  |  |
| 7894737 | --- | --- | --- | 0.039  | 1.028 | 8.99E-01 | 8.99E+01 |  |  |
| 7894740 | --- | --- | --- | 0.052  | 1.037 | 6.76E-01 | 6.76E+01 |  |  |
| 7894741 | --- | --- | --- | 0.082  | 1.058 | 6.35E-01 | 6.35E+01 |  |  |
| 7894742 | --- | --- | --- | 0.068  | 1.048 | 7.94E-01 | 7.94E+01 |  |  |
| 7894744 | --- | --- | --- | -0.047 | 0.968 | 8.50E-01 | 8.50E+01 |  |  |
| 7894745 | --- | --- | --- | 0.057  | 1.041 | 9.04E-01 | 9.04E+01 |  |  |
| 7894746 | --- | --- | --- | 0.088  | 1.063 | 6.22E-01 | 6.22E+01 |  |  |
| 7894747 | --- | --- | --- | 0.081  | 1.058 | 5.46E-01 | 5.46E+01 |  |  |
| 7894748 | --- | --- | --- | 0.130  | 1.094 | 8.05E-01 | 8.05E+01 |  |  |
| 7894752 | --- | --- | --- | -0.050 | 0.966 | 8.74E-01 | 8.74E+01 |  |  |
| 7894753 | --- | --- | --- | -0.078 | 0.947 | 8.06E-01 | 8.06E+01 |  |  |
| 7894754 | --- | --- | --- | 0.115  | 1.083 | 8.70E-01 | 8.70E+01 |  |  |
| 7894755 | --- | --- | --- | 0.145  | 1.106 | 8.07E-01 | 8.07E+01 |  |  |

|         |     |     |     |        |       |          |          |  |  |
|---------|-----|-----|-----|--------|-------|----------|----------|--|--|
| 7894756 | --- | --- | --- | -0.037 | 0.975 | 9.27E-01 | 9.27E+01 |  |  |
| 7894757 | --- | --- | --- | -0.042 | 0.972 | 8.76E-01 | 8.76E+01 |  |  |
| 7894758 | --- | --- | --- | -0.009 | 0.994 | 9.65E-01 | 9.65E+01 |  |  |
| 7894760 | --- | --- | --- | -0.024 | 0.984 | 9.27E-01 | 9.27E+01 |  |  |
| 7894761 | --- | --- | --- | -0.088 | 0.941 | 7.78E-01 | 7.78E+01 |  |  |
| 7894763 | --- | --- | --- | 0.153  | 1.112 | 6.89E-02 | 6.89E+00 |  |  |
| 7894764 | --- | --- | --- | 0.033  | 1.023 | 9.53E-01 | 9.53E+01 |  |  |
| 7894765 | --- | --- | --- | 0.085  | 1.061 | 7.68E-01 | 7.68E+01 |  |  |
| 7894766 | --- | --- | --- | 0.534  | 1.448 | 2.91E-01 | 2.91E+01 |  |  |
| 7894767 | --- | --- | --- | -0.039 | 0.974 | 9.23E-01 | 9.23E+01 |  |  |
| 7894768 | --- | --- | --- | 0.057  | 1.040 | 6.54E-01 | 6.54E+01 |  |  |
| 7894769 | --- | --- | --- | -0.046 | 0.969 | 7.17E-01 | 7.17E+01 |  |  |
| 7894770 | --- | --- | --- | 0.034  | 1.024 | 6.14E-01 | 6.14E+01 |  |  |
| 7894771 | --- | --- | --- | 0.336  | 1.263 | 1.29E-01 | 1.29E+01 |  |  |
| 7894772 | --- | --- | --- | 0.136  | 1.099 | 4.70E-01 | 4.70E+01 |  |  |
| 7894774 | --- | --- | --- | 0.086  | 1.061 | 6.81E-01 | 6.81E+01 |  |  |
| 7894775 | --- | --- | --- | 0.172  | 1.127 | 7.72E-01 | 7.72E+01 |  |  |
| 7894776 | --- | --- | --- | 0.134  | 1.097 | 7.62E-01 | 7.62E+01 |  |  |
| 7894777 | --- | --- | --- | -0.279 | 0.824 | 2.63E-01 | 2.63E+01 |  |  |
| 7894779 | --- | --- | --- | 0.054  | 1.038 | 7.10E-01 | 7.10E+01 |  |  |
| 7894781 | --- | --- | --- | -0.205 | 0.868 | 7.11E-01 | 7.11E+01 |  |  |
| 7894782 | --- | --- | --- | -0.215 | 0.862 | 5.46E-01 | 5.46E+01 |  |  |
| 7894783 | --- | --- | --- | -0.236 | 0.849 | 1.91E-01 | 1.91E+01 |  |  |
| 7894784 | --- | --- | --- | -0.043 | 0.971 | 8.30E-01 | 8.30E+01 |  |  |
| 7894787 | --- | --- | --- | 0.074  | 1.052 | 6.05E-01 | 6.05E+01 |  |  |
| 7894788 | --- | --- | --- | 0.007  | 1.005 | 9.88E-01 | 9.88E+01 |  |  |
| 7894789 | --- | --- | --- | 0.042  | 1.029 | 6.20E-01 | 6.20E+01 |  |  |
| 7894790 | --- | --- | --- | 0.065  | 1.046 | 7.28E-01 | 7.28E+01 |  |  |
| 7894791 | --- | --- | --- | -0.167 | 0.891 | 5.09E-01 | 5.09E+01 |  |  |
| 7894795 | --- | --- | --- | 0.010  | 1.007 | 9.78E-01 | 9.78E+01 |  |  |
| 7894796 | --- | --- | --- | -0.080 | 0.946 | 5.61E-01 | 5.61E+01 |  |  |
| 7894797 | --- | --- | --- | 0.368  | 1.290 | 5.55E-01 | 5.55E+01 |  |  |
| 7894798 | --- | --- | --- | -0.069 | 0.953 | 7.39E-01 | 7.39E+01 |  |  |
| 7894799 | --- | --- | --- | 0.075  | 1.053 | 5.29E-01 | 5.29E+01 |  |  |
| 7894800 | --- | --- | --- | 0.271  | 1.206 | 2.39E-01 | 2.39E+01 |  |  |
| 7894801 | --- | --- | --- | -0.035 | 0.976 | 8.28E-01 | 8.28E+01 |  |  |
| 7894802 | --- | --- | --- | 0.033  | 1.023 | 9.16E-01 | 9.16E+01 |  |  |
| 7894803 | --- | --- | --- | 0.441  | 1.357 | 9.19E-02 | 9.19E+00 |  |  |
| 7894804 | --- | --- | --- | -0.166 | 0.891 | 7.27E-01 | 7.27E+01 |  |  |
| 7894805 | --- | --- | --- | 0.613  | 1.530 | 5.53E-02 | 5.53E+00 |  |  |
| 7894806 | --- | --- | --- | -0.007 | 0.995 | 9.70E-01 | 9.70E+01 |  |  |
| 7894807 | --- | --- | --- | -0.016 | 0.989 | 9.83E-01 | 9.83E+01 |  |  |
| 7894808 | --- | --- | --- | 0.037  | 1.026 | 8.75E-01 | 8.75E+01 |  |  |
| 7894809 | --- | --- | --- | -0.173 | 0.887 | 6.93E-01 | 6.93E+01 |  |  |
| 7894810 | --- | --- | --- | 0.237  | 1.179 | 2.74E-01 | 2.74E+01 |  |  |
| 7894812 | --- | --- | --- | -0.018 | 0.987 | 9.85E-01 | 9.85E+01 |  |  |
| 7894813 | --- | --- | --- | -0.035 | 0.976 | 7.09E-01 | 7.09E+01 |  |  |
| 7894815 | --- | --- | --- | -0.082 | 0.945 | 8.95E-01 | 8.95E+01 |  |  |
| 7894816 | --- | --- | --- | 0.058  | 1.041 | 9.37E-01 | 9.37E+01 |  |  |
| 7894817 | --- | --- | --- | 0.091  | 1.065 | 5.17E-01 | 5.17E+01 |  |  |
| 7894818 | --- | --- | --- | -0.102 | 0.932 | 8.00E-01 | 8.00E+01 |  |  |
| 7894819 | --- | --- | --- | 0.141  | 1.102 | 7.13E-01 | 7.13E+01 |  |  |
| 7894820 | --- | --- | --- | 0.122  | 1.089 | 5.98E-01 | 5.98E+01 |  |  |
| 7894821 | --- | --- | --- | 0.243  | 1.184 | 3.41E-01 | 3.41E+01 |  |  |
| 7894822 | --- | --- | --- | 0.077  | 1.055 | 8.43E-01 | 8.43E+01 |  |  |
| 7894823 | --- | --- | --- | -0.310 | 0.807 | 1.57E-01 | 1.57E+01 |  |  |
| 7894824 | --- | --- | --- | -0.035 | 0.976 | 8.63E-01 | 8.63E+01 |  |  |
| 7894825 | --- | --- | --- | -0.039 | 0.973 | 9.64E-01 | 9.64E+01 |  |  |
| 7894826 | --- | --- | --- | 0.160  | 1.117 | 1.74E-01 | 1.74E+01 |  |  |
| 7894827 | --- | --- | --- | 0.064  | 1.045 | 7.75E-01 | 7.75E+01 |  |  |
| 7894830 | --- | --- | --- | 0.056  | 1.040 | 8.49E-01 | 8.49E+01 |  |  |
| 7894832 | --- | --- | --- | 0.069  | 1.049 | 8.79E-01 | 8.79E+01 |  |  |
| 7894833 | --- | --- | --- | 0.035  | 1.024 | 9.24E-01 | 9.24E+01 |  |  |
| 7894834 | --- | --- | --- | 0.019  | 1.013 | 9.19E-01 | 9.19E+01 |  |  |
| 7894836 | --- | --- | --- | 0.087  | 1.062 | 7.01E-01 | 7.01E+01 |  |  |
| 7894837 | --- | --- | --- | -0.089 | 0.940 | 5.43E-01 | 5.43E+01 |  |  |
| 7894838 | --- | --- | --- | 0.061  | 1.043 | 8.33E-01 | 8.33E+01 |  |  |
| 7894840 | --- | --- | --- | 0.076  | 1.054 | 5.15E-01 | 5.15E+01 |  |  |
| 7894842 | --- | --- | --- | 0.107  | 1.077 | 6.76E-01 | 6.76E+01 |  |  |
| 7894843 | --- | --- | --- | -0.180 | 0.882 | 4.62E-01 | 4.62E+01 |  |  |
| 7894844 | --- | --- | --- | -0.041 | 0.972 | 8.32E-01 | 8.32E+01 |  |  |
| 7894845 | --- | --- | --- | 0.034  | 1.024 | 8.17E-01 | 8.17E+01 |  |  |
| 7894846 | --- | --- | --- | -0.025 | 0.983 | 9.34E-01 | 9.34E+01 |  |  |
| 7894848 | --- | --- | --- | 0.027  | 1.019 | 9.63E-01 | 9.63E+01 |  |  |
| 7894849 | --- | --- | --- | 0.020  | 1.014 | 9.50E-01 | 9.50E+01 |  |  |
| 7894850 | --- | --- | --- | 0.041  | 1.029 | 9.27E-01 | 9.27E+01 |  |  |
| 7894852 | --- | --- | --- | 0.143  | 1.104 | 7.37E-01 | 7.37E+01 |  |  |

|         |     |     |     |        |       |          |          |  |  |
|---------|-----|-----|-----|--------|-------|----------|----------|--|--|
| 7894853 | --- | --- | --- | 0.031  | 1.022 | 8.76E-01 | 8.76E+01 |  |  |
| 7894854 | --- | --- | --- | -0.031 | 0.979 | 8.48E-01 | 8.48E+01 |  |  |
| 7894856 | --- | --- | --- | -0.173 | 0.887 | 2.83E-01 | 2.83E+01 |  |  |
| 7894858 | --- | --- | --- | 0.048  | 1.034 | 8.23E-01 | 8.23E+01 |  |  |
| 7894859 | --- | --- | --- | -0.009 | 0.994 | 9.88E-01 | 9.88E+01 |  |  |
| 7894860 | --- | --- | --- | 0.037  | 1.026 | 9.17E-01 | 9.17E+01 |  |  |
| 7894861 | --- | --- | --- | -0.157 | 0.897 | 5.81E-01 | 5.81E+01 |  |  |
| 7894862 | --- | --- | --- | -0.036 | 0.975 | 8.11E-01 | 8.11E+01 |  |  |
| 7894863 | --- | --- | --- | -0.063 | 0.958 | 8.05E-01 | 8.05E+01 |  |  |
| 7894864 | --- | --- | --- | 0.048  | 1.034 | 8.92E-01 | 8.92E+01 |  |  |
| 7894865 | --- | --- | --- | -0.101 | 0.932 | 7.61E-01 | 7.61E+01 |  |  |
| 7894866 | --- | --- | --- | 0.117  | 1.084 | 6.71E-01 | 6.71E+01 |  |  |
| 7894867 | --- | --- | --- | -0.088 | 0.941 | 9.07E-01 | 9.07E+01 |  |  |
| 7894869 | --- | --- | --- | 0.176  | 1.130 | 7.05E-01 | 7.05E+01 |  |  |
| 7894870 | --- | --- | --- | 0.361  | 1.284 | 4.43E-01 | 4.43E+01 |  |  |
| 7894872 | --- | --- | --- | -0.013 | 0.991 | 9.50E-01 | 9.50E+01 |  |  |
| 7894873 | --- | --- | --- | 0.049  | 1.035 | 8.96E-01 | 8.96E+01 |  |  |
| 7894876 | --- | --- | --- | 0.075  | 1.053 | 8.75E-01 | 8.75E+01 |  |  |
| 7894877 | --- | --- | --- | -0.001 | 0.999 | 9.97E-01 | 9.97E+01 |  |  |
| 7894878 | --- | --- | --- | 0.214  | 1.160 | 3.28E-01 | 3.28E+01 |  |  |
| 7894879 | --- | --- | --- | 0.138  | 1.100 | 8.06E-01 | 8.06E+01 |  |  |
| 7894880 | --- | --- | --- | -0.141 | 0.907 | 4.75E-01 | 4.75E+01 |  |  |
| 7894881 | --- | --- | --- | -0.072 | 0.951 | 3.66E-01 | 3.66E+01 |  |  |
| 7894882 | --- | --- | --- | 0.268  | 1.204 | 6.39E-01 | 6.39E+01 |  |  |
| 7894883 | --- | --- | --- | 0.252  | 1.191 | 2.28E-01 | 2.28E+01 |  |  |
| 7894884 | --- | --- | --- | -0.099 | 0.934 | 6.43E-01 | 6.43E+01 |  |  |
| 7894885 | --- | --- | --- | 0.111  | 1.080 | 6.70E-01 | 6.70E+01 |  |  |
| 7894886 | --- | --- | --- | -0.102 | 0.931 | 7.75E-01 | 7.75E+01 |  |  |
| 7894888 | --- | --- | --- | 0.270  | 1.206 | 1.38E-01 | 1.38E+01 |  |  |
| 7894889 | --- | --- | --- | -0.037 | 0.975 | 8.48E-01 | 8.48E+01 |  |  |
| 7894890 | --- | --- | --- | 0.016  | 1.011 | 9.86E-01 | 9.86E+01 |  |  |
| 7894891 | --- | --- | --- | -0.084 | 0.943 | 7.05E-01 | 7.05E+01 |  |  |
| 7894894 | --- | --- | --- | -0.024 | 0.984 | 9.14E-01 | 9.14E+01 |  |  |
| 7894895 | --- | --- | --- | 0.205  | 1.153 | 7.45E-01 | 7.45E+01 |  |  |
| 7894896 | --- | --- | --- | -0.004 | 0.997 | 9.84E-01 | 9.84E+01 |  |  |
| 7894898 | --- | --- | --- | 0.083  | 1.059 | 8.13E-01 | 8.13E+01 |  |  |
| 7894899 | --- | --- | --- | 0.213  | 1.159 | 5.04E-01 | 5.04E+01 |  |  |
| 7894900 | --- | --- | --- | -0.017 | 0.988 | 9.78E-01 | 9.78E+01 |  |  |
| 7894901 | --- | --- | --- | 0.176  | 1.130 | 4.02E-01 | 4.02E+01 |  |  |
| 7894903 | --- | --- | --- | 0.127  | 1.092 | 7.00E-01 | 7.00E+01 |  |  |
| 7894904 | --- | --- | --- | -0.055 | 0.963 | 9.10E-01 | 9.10E+01 |  |  |
| 7894905 | --- | --- | --- | 0.040  | 1.028 | 9.44E-01 | 9.44E+01 |  |  |
| 7894906 | --- | --- | --- | -0.133 | 0.912 | 6.48E-01 | 6.48E+01 |  |  |
| 7894907 | --- | --- | --- | 0.046  | 1.033 | 9.40E-01 | 9.40E+01 |  |  |
| 7894908 | --- | --- | --- | 0.133  | 1.097 | 2.92E-01 | 2.92E+01 |  |  |
| 7894909 | --- | --- | --- | 0.014  | 1.010 | 8.27E-01 | 8.27E+01 |  |  |
| 7894911 | --- | --- | --- | -0.095 | 0.936 | 9.07E-01 | 9.07E+01 |  |  |
| 7894914 | --- | --- | --- | 0.044  | 1.031 | 8.88E-01 | 8.88E+01 |  |  |
| 7894915 | --- | --- | --- | -0.007 | 0.995 | 9.88E-01 | 9.88E+01 |  |  |
| 7894916 | --- | --- | --- | -0.004 | 0.997 | 9.85E-01 | 9.85E+01 |  |  |
| 7894917 | --- | --- | --- | -0.022 | 0.985 | 9.61E-01 | 9.61E+01 |  |  |
| 7894919 | --- | --- | --- | -0.007 | 0.995 | 9.65E-01 | 9.65E+01 |  |  |
| 7894925 | --- | --- | --- | -0.021 | 0.985 | 9.84E-01 | 9.84E+01 |  |  |
| 7894926 | --- | --- | --- | -0.010 | 0.993 | 9.76E-01 | 9.76E+01 |  |  |
| 7894927 | --- | --- | --- | 0.014  | 1.010 | 9.84E-01 | 9.84E+01 |  |  |
| 7894928 | --- | --- | --- | 0.020  | 1.014 | 9.66E-01 | 9.66E+01 |  |  |
| 7894930 | --- | --- | --- | 0.195  | 1.145 | 6.66E-01 | 6.66E+01 |  |  |
| 7894931 | --- | --- | --- | -0.051 | 0.966 | 9.20E-01 | 9.20E+01 |  |  |
| 7894934 | --- | --- | --- | 0.031  | 1.022 | 8.67E-01 | 8.67E+01 |  |  |
| 7894937 | --- | --- | --- | -0.168 | 0.890 | 8.48E-01 | 8.48E+01 |  |  |
| 7894938 | --- | --- | --- | 0.233  | 1.175 | 5.76E-01 | 5.76E+01 |  |  |
| 7894939 | --- | --- | --- | 0.309  | 1.239 | 5.91E-01 | 5.91E+01 |  |  |
| 7894940 | --- | --- | --- | -0.078 | 0.947 | 9.14E-01 | 9.14E+01 |  |  |
| 7894941 | --- | --- | --- | 0.024  | 1.017 | 8.92E-01 | 8.92E+01 |  |  |
| 7894945 | --- | --- | --- | 0.013  | 1.009 | 9.64E-01 | 9.64E+01 |  |  |
| 7894946 | --- | --- | --- | -0.323 | 0.799 | 5.73E-01 | 5.73E+01 |  |  |
| 7894947 | --- | --- | --- | 0.108  | 1.078 | 7.69E-01 | 7.69E+01 |  |  |
| 7894949 | --- | --- | --- | 0.113  | 1.081 | 7.67E-01 | 7.67E+01 |  |  |
| 7894950 | --- | --- | --- | -0.004 | 0.997 | 9.90E-01 | 9.90E+01 |  |  |
| 7894951 | --- | --- | --- | 0.051  | 1.036 | 8.45E-01 | 8.45E+01 |  |  |
| 7894952 | --- | --- | --- | 0.219  | 1.164 | 5.56E-01 | 5.56E+01 |  |  |
| 7894953 | --- | --- | --- | -0.013 | 0.991 | 9.84E-01 | 9.84E+01 |  |  |
| 7894954 | --- | --- | --- | -0.048 | 0.968 | 8.66E-01 | 8.66E+01 |  |  |
| 7894955 | --- | --- | --- | 0.031  | 1.022 | 9.67E-01 | 9.67E+01 |  |  |
| 7894956 | --- | --- | --- | 0.113  | 1.082 | 7.83E-01 | 7.83E+01 |  |  |
| 7894957 | --- | --- | --- | -0.093 | 0.938 | 8.24E-01 | 8.24E+01 |  |  |
| 7894958 | --- | --- | --- | 0.042  | 1.029 | 9.56E-01 | 9.56E+01 |  |  |

|         |     |     |     |        |       |          |          |  |  |
|---------|-----|-----|-----|--------|-------|----------|----------|--|--|
| 7894959 | --- | --- | --- | 0.166  | 1.122 | 7.78E-01 | 7.78E+01 |  |  |
| 7894960 | --- | --- | --- | 0.032  | 1.022 | 9.00E-01 | 9.00E+01 |  |  |
| 7894961 | --- | --- | --- | 0.010  | 1.007 | 9.83E-01 | 9.83E+01 |  |  |
| 7894963 | --- | --- | --- | -0.014 | 0.991 | 9.87E-01 | 9.87E+01 |  |  |
| 7894964 | --- | --- | --- | 0.004  | 1.003 | 9.86E-01 | 9.86E+01 |  |  |
| 7894965 | --- | --- | --- | -0.056 | 0.962 | 8.57E-01 | 8.57E+01 |  |  |
| 7894968 | --- | --- | --- | 0.180  | 1.133 | 1.07E-01 | 1.07E+01 |  |  |
| 7894969 | --- | --- | --- | 0.005  | 1.003 | 9.89E-01 | 9.89E+01 |  |  |
| 7894970 | --- | --- | --- | 0.016  | 1.011 | 8.95E-01 | 8.95E+01 |  |  |
| 7894971 | --- | --- | --- | -0.011 | 0.993 | 9.44E-01 | 9.44E+01 |  |  |
| 7894973 | --- | --- | --- | -0.016 | 0.989 | 9.77E-01 | 9.77E+01 |  |  |
| 7894974 | --- | --- | --- | -0.031 | 0.979 | 9.44E-01 | 9.44E+01 |  |  |
| 7894975 | --- | --- | --- | 0.053  | 1.038 | 8.05E-01 | 8.05E+01 |  |  |
| 7894976 | --- | --- | --- | 0.072  | 1.051 | 6.63E-01 | 6.63E+01 |  |  |
| 7894977 | --- | --- | --- | 0.013  | 1.009 | 9.78E-01 | 9.78E+01 |  |  |
| 7894978 | --- | --- | --- | 0.075  | 1.053 | 7.12E-01 | 7.12E+01 |  |  |
| 7894979 | --- | --- | --- | 0.025  | 1.018 | 9.16E-01 | 9.16E+01 |  |  |
| 7894980 | --- | --- | --- | -0.135 | 0.911 | 3.92E-01 | 3.92E+01 |  |  |
| 7894981 | --- | --- | --- | 0.270  | 1.206 | 2.30E-01 | 2.30E+01 |  |  |
| 7894982 | --- | --- | --- | -0.025 | 0.983 | 8.66E-01 | 8.66E+01 |  |  |
| 7894984 | --- | --- | --- | -0.065 | 0.956 | 6.78E-01 | 6.78E+01 |  |  |
| 7894986 | --- | --- | --- | -0.367 | 0.776 | 3.52E-01 | 3.52E+01 |  |  |
| 7894988 | --- | --- | --- | -0.058 | 0.961 | 7.45E-01 | 7.45E+01 |  |  |
| 7894990 | --- | --- | --- | -0.022 | 0.985 | 9.09E-01 | 9.09E+01 |  |  |
| 7894991 | --- | --- | --- | 0.015  | 1.011 | 8.87E-01 | 8.87E+01 |  |  |
| 7894992 | --- | --- | --- | -0.003 | 0.998 | 9.87E-01 | 9.87E+01 |  |  |
| 7894993 | --- | --- | --- | -0.055 | 0.963 | 9.36E-01 | 9.36E+01 |  |  |
| 7894994 | --- | --- | --- | 0.140  | 1.102 | 6.07E-01 | 6.07E+01 |  |  |
| 7894995 | --- | --- | --- | 0.096  | 1.069 | 7.94E-01 | 7.94E+01 |  |  |
| 7894996 | --- | --- | --- | -0.083 | 0.944 | 8.62E-01 | 8.62E+01 |  |  |
| 7894997 | --- | --- | --- | -0.132 | 0.912 | 7.98E-01 | 7.98E+01 |  |  |
| 7894999 | --- | --- | --- | 0.015  | 1.011 | 8.71E-01 | 8.71E+01 |  |  |
| 7895000 | --- | --- | --- | 0.068  | 1.049 | 7.96E-01 | 7.96E+01 |  |  |
| 7895001 | --- | --- | --- | -0.028 | 0.981 | 9.43E-01 | 9.43E+01 |  |  |
| 7895003 | --- | --- | --- | -0.067 | 0.955 | 7.32E-01 | 7.32E+01 |  |  |
| 7895004 | --- | --- | --- | 0.075  | 1.053 | 5.29E-01 | 5.29E+01 |  |  |
| 7895005 | --- | --- | --- | -0.053 | 0.964 | 8.90E-01 | 8.90E+01 |  |  |
| 7895006 | --- | --- | --- | 0.151  | 1.110 | 8.38E-01 | 8.38E+01 |  |  |
| 7895007 | --- | --- | --- | 0.082  | 1.059 | 6.45E-01 | 6.45E+01 |  |  |
| 7895009 | --- | --- | --- | 0.072  | 1.051 | 6.94E-01 | 6.94E+01 |  |  |
| 7895011 | --- | --- | --- | 0.093  | 1.067 | 7.20E-01 | 7.20E+01 |  |  |
| 7895012 | --- | --- | --- | 0.010  | 1.007 | 9.60E-01 | 9.60E+01 |  |  |
| 7895014 | --- | --- | --- | -0.079 | 0.947 | 6.35E-01 | 6.35E+01 |  |  |
| 7895015 | --- | --- | --- | 0.035  | 1.025 | 9.44E-01 | 9.44E+01 |  |  |
| 7895016 | --- | --- | --- | 0.178  | 1.131 | 5.43E-01 | 5.43E+01 |  |  |
| 7895017 | --- | --- | --- | 0.109  | 1.079 | 9.99E-02 | 9.99E+00 |  |  |
| 7895019 | --- | --- | --- | 0.178  | 1.131 | 6.73E-01 | 6.73E+01 |  |  |
| 7895020 | --- | --- | --- | 0.003  | 1.002 | 9.90E-01 | 9.90E+01 |  |  |
| 7895022 | --- | --- | --- | -0.001 | 0.999 | 9.99E-01 | 9.99E+01 |  |  |
| 7895023 | --- | --- | --- | 0.056  | 1.040 | 8.95E-01 | 8.95E+01 |  |  |
| 7895024 | --- | --- | --- | 0.277  | 1.211 | 6.25E-02 | 6.25E+00 |  |  |
| 7895026 | --- | --- | --- | 0.016  | 1.011 | 8.86E-01 | 8.86E+01 |  |  |
| 7895030 | --- | --- | --- | 0.402  | 1.321 | 1.45E-01 | 1.45E+01 |  |  |
| 7895032 | --- | --- | --- | 0.101  | 1.073 | 7.14E-01 | 7.14E+01 |  |  |
| 7895033 | --- | --- | --- | -0.104 | 0.931 | 4.74E-01 | 4.74E+01 |  |  |
| 7895034 | --- | --- | --- | -0.065 | 0.956 | 7.46E-01 | 7.46E+01 |  |  |
| 7895035 | --- | --- | --- | 0.082  | 1.059 | 8.49E-01 | 8.49E+01 |  |  |
| 7895036 | --- | --- | --- | 0.068  | 1.048 | 7.14E-01 | 7.14E+01 |  |  |
| 7895037 | --- | --- | --- | 0.151  | 1.111 | 6.70E-01 | 6.70E+01 |  |  |
| 7895038 | --- | --- | --- | 0.304  | 1.234 | 3.21E-02 | 3.21E+00 |  |  |
| 7895039 | --- | --- | --- | -0.009 | 0.994 | 9.69E-01 | 9.69E+01 |  |  |
| 7895040 | --- | --- | --- | -0.017 | 0.988 | 9.81E-01 | 9.81E+01 |  |  |
| 7895041 | --- | --- | --- | -0.119 | 0.921 | 4.96E-01 | 4.96E+01 |  |  |
| 7895042 | --- | --- | --- | 0.015  | 1.010 | 9.57E-01 | 9.57E+01 |  |  |
| 7895044 | --- | --- | --- | 0.078  | 1.055 | 8.70E-01 | 8.70E+01 |  |  |
| 7895045 | --- | --- | --- | -0.007 | 0.995 | 9.85E-01 | 9.85E+01 |  |  |
| 7895046 | --- | --- | --- | -0.151 | 0.901 | 7.03E-01 | 7.03E+01 |  |  |
| 7895047 | --- | --- | --- | 0.032  | 1.022 | 8.49E-01 | 8.49E+01 |  |  |
| 7895048 | --- | --- | --- | 0.082  | 1.059 | 8.33E-01 | 8.33E+01 |  |  |
| 7895050 | --- | --- | --- | -0.294 | 0.816 | 9.26E-02 | 9.26E+00 |  |  |
| 7895052 | --- | --- | --- | -0.050 | 0.966 | 7.23E-01 | 7.23E+01 |  |  |
| 7895053 | --- | --- | --- | -0.138 | 0.909 | 7.90E-01 | 7.90E+01 |  |  |
| 7895054 | --- | --- | --- | 0.221  | 1.165 | 7.50E-01 | 7.50E+01 |  |  |
| 7895055 | --- | --- | --- | -0.011 | 0.992 | 9.78E-01 | 9.78E+01 |  |  |
| 7895056 | --- | --- | --- | -0.173 | 0.887 | 4.04E-01 | 4.04E+01 |  |  |
| 7895057 | --- | --- | --- | -0.002 | 0.998 | 9.87E-01 | 9.87E+01 |  |  |
| 7895059 | --- | --- | --- | 0.289  | 1.221 | 6.31E-01 | 6.31E+01 |  |  |

|         |     |     |     |        |       |          |          |  |  |
|---------|-----|-----|-----|--------|-------|----------|----------|--|--|
| 7895060 | --- | --- | --- | 0.259  | 1.197 | 4.33E-01 | 4.33E+01 |  |  |
| 7895061 | --- | --- | --- | 0.068  | 1.048 | 9.02E-01 | 9.02E+01 |  |  |
| 7895062 | --- | --- | --- | -0.053 | 0.964 | 8.10E-01 | 8.10E+01 |  |  |
| 7895063 | --- | --- | --- | 0.001  | 1.001 | 9.98E-01 | 9.98E+01 |  |  |
| 7895066 | --- | --- | --- | 0.000  | 1.000 | 1.00E+00 | 1.00E+02 |  |  |
| 7895067 | --- | --- | --- | -0.112 | 0.925 | 4.21E-01 | 4.21E+01 |  |  |
| 7895068 | --- | --- | --- | -0.050 | 0.966 | 8.29E-01 | 8.29E+01 |  |  |
| 7895069 | --- | --- | --- | -0.044 | 0.970 | 9.37E-01 | 9.37E+01 |  |  |
| 7895070 | --- | --- | --- | 0.049  | 1.034 | 7.97E-01 | 7.97E+01 |  |  |
| 7895072 | --- | --- | --- | 0.035  | 1.025 | 8.62E-01 | 8.62E+01 |  |  |
| 7895073 | --- | --- | --- | -0.253 | 0.839 | 6.79E-01 | 6.79E+01 |  |  |
| 7895074 | --- | --- | --- | -0.250 | 0.841 | 5.15E-01 | 5.15E+01 |  |  |
| 7895077 | --- | --- | --- | -0.051 | 0.965 | 7.78E-01 | 7.78E+01 |  |  |
| 7895080 | --- | --- | --- | 0.154  | 1.112 | 7.08E-01 | 7.08E+01 |  |  |
| 7895081 | --- | --- | --- | 0.047  | 1.033 | 9.13E-01 | 9.13E+01 |  |  |
| 7895082 | --- | --- | --- | -0.017 | 0.988 | 9.14E-01 | 9.14E+01 |  |  |
| 7895084 | --- | --- | --- | 0.014  | 1.009 | 9.58E-01 | 9.58E+01 |  |  |
| 7895085 | --- | --- | --- | -0.055 | 0.963 | 9.46E-01 | 9.46E+01 |  |  |
| 7895087 | --- | --- | --- | 0.079  | 1.056 | 8.63E-01 | 8.63E+01 |  |  |
| 7895088 | --- | --- | --- | -0.038 | 0.974 | 9.29E-01 | 9.29E+01 |  |  |
| 7895089 | --- | --- | --- | 0.024  | 1.017 | 9.49E-01 | 9.49E+01 |  |  |
| 7895090 | --- | --- | --- | 0.178  | 1.131 | 3.90E-01 | 3.90E+01 |  |  |
| 7895091 | --- | --- | --- | 0.020  | 1.014 | 9.76E-01 | 9.76E+01 |  |  |
| 7895093 | --- | --- | --- | 0.057  | 1.040 | 8.82E-01 | 8.82E+01 |  |  |
| 7895094 | --- | --- | --- | 0.104  | 1.075 | 7.57E-01 | 7.57E+01 |  |  |
| 7895095 | --- | --- | --- | -0.078 | 0.947 | 7.68E-01 | 7.68E+01 |  |  |
| 7895097 | --- | --- | --- | 0.441  | 1.357 | 1.09E-01 | 1.09E+01 |  |  |
| 7895098 | --- | --- | --- | -0.079 | 0.946 | 8.68E-01 | 8.68E+01 |  |  |
| 7895099 | --- | --- | --- | 0.066  | 1.047 | 9.37E-01 | 9.37E+01 |  |  |
| 7895100 | --- | --- | --- | 0.027  | 1.019 | 7.48E-01 | 7.48E+01 |  |  |
| 7895101 | --- | --- | --- | 0.070  | 1.050 | 8.06E-01 | 8.06E+01 |  |  |
| 7895103 | --- | --- | --- | 0.205  | 1.153 | 7.44E-01 | 7.44E+01 |  |  |
| 7895104 | --- | --- | --- | 0.053  | 1.037 | 7.94E-01 | 7.94E+01 |  |  |
| 7895105 | --- | --- | --- | -0.263 | 0.833 | 4.27E-01 | 4.27E+01 |  |  |
| 7895106 | --- | --- | --- | 0.026  | 1.018 | 8.97E-01 | 8.97E+01 |  |  |
| 7895107 | --- | --- | --- | -0.090 | 0.940 | 7.57E-01 | 7.57E+01 |  |  |
| 7895110 | --- | --- | --- | 0.017  | 1.012 | 9.27E-01 | 9.27E+01 |  |  |
| 7895112 | --- | --- | --- | -0.004 | 0.997 | 9.88E-01 | 9.88E+01 |  |  |
| 7895113 | --- | --- | --- | -0.151 | 0.900 | 3.09E-01 | 3.09E+01 |  |  |
| 7895114 | --- | --- | --- | -0.031 | 0.979 | 9.40E-01 | 9.40E+01 |  |  |
| 7895115 | --- | --- | --- | 0.058  | 1.041 | 7.49E-01 | 7.49E+01 |  |  |
| 7895118 | --- | --- | --- | 0.000  | 1.000 | 1.00E+00 | 1.00E+02 |  |  |
| 7895119 | --- | --- | --- | -0.048 | 0.967 | 7.77E-01 | 7.77E+01 |  |  |
| 7895121 | --- | --- | --- | 0.073  | 1.052 | 7.79E-01 | 7.79E+01 |  |  |
| 7895122 | --- | --- | --- | 0.020  | 1.014 | 8.89E-01 | 8.89E+01 |  |  |
| 7895123 | --- | --- | --- | 0.028  | 1.020 | 8.04E-01 | 8.04E+01 |  |  |
| 7895124 | --- | --- | --- | 0.042  | 1.030 | 9.49E-01 | 9.49E+01 |  |  |
| 7895125 | --- | --- | --- | -0.045 | 0.969 | 9.33E-01 | 9.33E+01 |  |  |
| 7895126 | --- | --- | --- | 0.024  | 1.017 | 9.07E-01 | 9.07E+01 |  |  |
| 7895130 | --- | --- | --- | 0.048  | 1.034 | 7.73E-01 | 7.73E+01 |  |  |
| 7895131 | --- | --- | --- | -0.081 | 0.946 | 8.63E-01 | 8.63E+01 |  |  |
| 7895132 | --- | --- | --- | 0.400  | 1.319 | 3.07E-01 | 3.07E+01 |  |  |
| 7895133 | --- | --- | --- | 0.183  | 1.135 | 2.10E-01 | 2.10E+01 |  |  |
| 7895134 | --- | --- | --- | -0.121 | 0.919 | 9.09E-01 | 9.09E+01 |  |  |
| 7895137 | --- | --- | --- | -0.099 | 0.934 | 6.23E-01 | 6.23E+01 |  |  |
| 7895139 | --- | --- | --- | 0.013  | 1.009 | 9.48E-01 | 9.48E+01 |  |  |
| 7895141 | --- | --- | --- | 0.195  | 1.145 | 5.41E-01 | 5.41E+01 |  |  |
| 7895142 | --- | --- | --- | 0.933  | 1.909 | 6.76E-02 | 6.76E+00 |  |  |
| 7895143 | --- | --- | --- | -0.034 | 0.977 | 9.00E-01 | 9.00E+01 |  |  |
| 7895144 | --- | --- | --- | -0.027 | 0.982 | 8.36E-01 | 8.36E+01 |  |  |
| 7895145 | --- | --- | --- | -0.087 | 0.942 | 5.37E-01 | 5.37E+01 |  |  |
| 7895146 | --- | --- | --- | 0.263  | 1.200 | 6.38E-01 | 6.38E+01 |  |  |
| 7895147 | --- | --- | --- | -0.100 | 0.933 | 7.92E-01 | 7.92E+01 |  |  |
| 7895149 | --- | --- | --- | 0.171  | 1.125 | 2.57E-01 | 2.57E+01 |  |  |
| 7895150 | --- | --- | --- | 0.048  | 1.034 | 9.47E-01 | 9.47E+01 |  |  |
| 7895151 | --- | --- | --- | 0.049  | 1.035 | 9.37E-01 | 9.37E+01 |  |  |
| 7895152 | --- | --- | --- | -0.036 | 0.975 | 9.50E-01 | 9.50E+01 |  |  |
| 7895153 | --- | --- | --- | -0.001 | 1.000 | 1.00E+00 | 1.00E+02 |  |  |
| 7895154 | --- | --- | --- | 0.093  | 1.067 | 8.78E-01 | 8.78E+01 |  |  |
| 7895155 | --- | --- | --- | 0.366  | 1.288 | 1.86E-01 | 1.86E+01 |  |  |
| 7895156 | --- | --- | --- | 0.078  | 1.055 | 5.63E-01 | 5.63E+01 |  |  |
| 7895157 | --- | --- | --- | -0.025 | 0.983 | 8.48E-01 | 8.48E+01 |  |  |
| 7895158 | --- | --- | --- | 0.433  | 1.350 | 5.15E-02 | 5.15E+00 |  |  |
| 7895160 | --- | --- | --- | 0.001  | 1.001 | 9.97E-01 | 9.97E+01 |  |  |
| 7895161 | --- | --- | --- | 0.047  | 1.033 | 8.67E-01 | 8.67E+01 |  |  |
| 7895162 | --- | --- | --- | -0.014 | 0.990 | 9.77E-01 | 9.77E+01 |  |  |
| 7895165 | --- | --- | --- | 0.002  | 1.001 | 9.94E-01 | 9.94E+01 |  |  |

|         |     |     |     |        |       |          |          |  |  |
|---------|-----|-----|-----|--------|-------|----------|----------|--|--|
| 7895168 | --- | --- | --- | -0.019 | 0.987 | 9.51E-01 | 9.51E+01 |  |  |
| 7895169 | --- | --- | --- | -0.004 | 0.997 | 9.89E-01 | 9.89E+01 |  |  |
| 7895170 | --- | --- | --- | 0.012  | 1.008 | 9.63E-01 | 9.63E+01 |  |  |
| 7895171 | --- | --- | --- | -0.132 | 0.913 | 4.05E-01 | 4.05E+01 |  |  |
| 7895172 | --- | --- | --- | 0.199  | 1.148 | 7.19E-01 | 7.19E+01 |  |  |
| 7895173 | --- | --- | --- | 0.060  | 1.042 | 8.73E-01 | 8.73E+01 |  |  |
| 7895174 | --- | --- | --- | -0.077 | 0.948 | 6.99E-01 | 6.99E+01 |  |  |
| 7895175 | --- | --- | --- | 0.087  | 1.062 | 8.93E-01 | 8.93E+01 |  |  |
| 7895177 | --- | --- | --- | -0.038 | 0.974 | 9.35E-01 | 9.35E+01 |  |  |
| 7895178 | --- | --- | --- | -0.005 | 0.997 | 9.84E-01 | 9.84E+01 |  |  |
| 7895180 | --- | --- | --- | 0.018  | 1.012 | 9.64E-01 | 9.64E+01 |  |  |
| 7895181 | --- | --- | --- | 0.163  | 1.120 | 3.35E-01 | 3.35E+01 |  |  |
| 7895184 | --- | --- | --- | 0.105  | 1.076 | 8.62E-01 | 8.62E+01 |  |  |
| 7895185 | --- | --- | --- | 0.027  | 1.019 | 9.50E-01 | 9.50E+01 |  |  |
| 7895186 | --- | --- | --- | -0.068 | 0.954 | 8.63E-01 | 8.63E+01 |  |  |
| 7895187 | --- | --- | --- | 0.069  | 1.049 | 8.13E-01 | 8.13E+01 |  |  |
| 7895188 | --- | --- | --- | 0.276  | 1.211 | 4.49E-01 | 4.49E+01 |  |  |
| 7895189 | --- | --- | --- | 0.027  | 1.019 | 9.27E-01 | 9.27E+01 |  |  |
| 7895192 | --- | --- | --- | -0.132 | 0.913 | 4.68E-01 | 4.68E+01 |  |  |
| 7895193 | --- | --- | --- | -0.002 | 0.999 | 9.94E-01 | 9.94E+01 |  |  |
| 7895194 | --- | --- | --- | 0.237  | 1.178 | 4.32E-01 | 4.32E+01 |  |  |
| 7895196 | --- | --- | --- | 0.008  | 1.005 | 9.72E-01 | 9.72E+01 |  |  |
| 7895197 | --- | --- | --- | 0.555  | 1.469 | 8.96E-02 | 8.96E+00 |  |  |
| 7895198 | --- | --- | --- | -0.039 | 0.973 | 9.78E-01 | 9.78E+01 |  |  |
| 7895202 | --- | --- | --- | -0.151 | 0.900 | 5.75E-01 | 5.75E+01 |  |  |
| 7895203 | --- | --- | --- | 0.017  | 1.012 | 9.88E-01 | 9.88E+01 |  |  |
| 7895204 | --- | --- | --- | -0.004 | 0.997 | 9.94E-01 | 9.94E+01 |  |  |
| 7895205 | --- | --- | --- | -0.027 | 0.981 | 9.76E-01 | 9.76E+01 |  |  |
| 7895206 | --- | --- | --- | -0.060 | 0.959 | 7.56E-01 | 7.56E+01 |  |  |
| 7895208 | --- | --- | --- | 0.136  | 1.099 | 7.40E-01 | 7.40E+01 |  |  |
| 7895209 | --- | --- | --- | 0.109  | 1.078 | 8.20E-01 | 8.20E+01 |  |  |
| 7895210 | --- | --- | --- | 0.059  | 1.042 | 5.56E-01 | 5.56E+01 |  |  |
| 7895211 | --- | --- | --- | -0.211 | 0.864 | 6.31E-01 | 6.31E+01 |  |  |
| 7895212 | --- | --- | --- | 0.154  | 1.112 | 5.50E-01 | 5.50E+01 |  |  |
| 7895213 | --- | --- | --- | -0.156 | 0.898 | 6.47E-01 | 6.47E+01 |  |  |
| 7895214 | --- | --- | --- | 0.006  | 1.004 | 9.72E-01 | 9.72E+01 |  |  |
| 7895215 | --- | --- | --- | 0.054  | 1.038 | 6.78E-01 | 6.78E+01 |  |  |
| 7895216 | --- | --- | --- | 0.029  | 1.020 | 7.92E-01 | 7.92E+01 |  |  |
| 7895217 | --- | --- | --- | -0.182 | 0.882 | 4.28E-01 | 4.28E+01 |  |  |
| 7895219 | --- | --- | --- | 0.179  | 1.132 | 6.18E-01 | 6.18E+01 |  |  |
| 7895220 | --- | --- | --- | 0.040  | 1.028 | 8.73E-01 | 8.73E+01 |  |  |
| 7895221 | --- | --- | --- | 0.057  | 1.040 | 7.27E-01 | 7.27E+01 |  |  |
| 7895223 | --- | --- | --- | 0.060  | 1.043 | 7.83E-01 | 7.83E+01 |  |  |
| 7895224 | --- | --- | --- | -0.068 | 0.954 | 7.27E-01 | 7.27E+01 |  |  |
| 7895225 | --- | --- | --- | 0.028  | 1.019 | 8.55E-01 | 8.55E+01 |  |  |
| 7895226 | --- | --- | --- | -0.063 | 0.957 | 6.86E-01 | 6.86E+01 |  |  |
| 7895227 | --- | --- | --- | 0.006  | 1.004 | 9.84E-01 | 9.84E+01 |  |  |
| 7895228 | --- | --- | --- | 0.045  | 1.032 | 9.33E-01 | 9.33E+01 |  |  |
| 7895230 | --- | --- | --- | 0.017  | 1.012 | 8.78E-01 | 8.78E+01 |  |  |
| 7895231 | --- | --- | --- | 0.179  | 1.132 | 6.35E-01 | 6.35E+01 |  |  |
| 7895232 | --- | --- | --- | -0.099 | 0.934 | 6.80E-01 | 6.80E+01 |  |  |
| 7895233 | --- | --- | --- | 0.120  | 1.087 | 5.34E-01 | 5.34E+01 |  |  |
| 7895234 | --- | --- | --- | -0.013 | 0.991 | 9.81E-01 | 9.81E+01 |  |  |
| 7895235 | --- | --- | --- | 0.198  | 1.147 | 1.72E-01 | 1.72E+01 |  |  |
| 7895237 | --- | --- | --- | -0.020 | 0.986 | 9.49E-01 | 9.49E+01 |  |  |
| 7895238 | --- | --- | --- | 0.153  | 1.112 | 3.85E-02 | 3.85E+00 |  |  |
| 7895239 | --- | --- | --- | 0.018  | 1.012 | 9.31E-01 | 9.31E+01 |  |  |
| 7895240 | --- | --- | --- | 0.271  | 1.207 | 1.42E-01 | 1.42E+01 |  |  |
| 7895241 | --- | --- | --- | -0.141 | 0.907 | 5.89E-01 | 5.89E+01 |  |  |
| 7895246 | --- | --- | --- | 0.018  | 1.012 | 9.76E-01 | 9.76E+01 |  |  |
| 7895247 | --- | --- | --- | 0.234  | 1.176 | 1.78E-01 | 1.78E+01 |  |  |
| 7895248 | --- | --- | --- | 0.038  | 1.026 | 8.69E-01 | 8.69E+01 |  |  |
| 7895249 | --- | --- | --- | 0.045  | 1.031 | 8.33E-01 | 8.33E+01 |  |  |
| 7895252 | --- | --- | --- | 0.061  | 1.043 | 7.27E-01 | 7.27E+01 |  |  |
| 7895253 | --- | --- | --- | 0.037  | 1.026 | 9.10E-01 | 9.10E+01 |  |  |
| 7895254 | --- | --- | --- | -0.010 | 0.993 | 9.88E-01 | 9.88E+01 |  |  |
| 7895255 | --- | --- | --- | 0.783  | 1.720 | 2.50E-01 | 2.50E+01 |  |  |
| 7895256 | --- | --- | --- | 0.003  | 1.002 | 9.90E-01 | 9.90E+01 |  |  |
| 7895257 | --- | --- | --- | 0.181  | 1.133 | 4.55E-01 | 4.55E+01 |  |  |
| 7895258 | --- | --- | --- | 0.098  | 1.070 | 7.19E-01 | 7.19E+01 |  |  |
| 7895259 | --- | --- | --- | 0.130  | 1.094 | 5.07E-01 | 5.07E+01 |  |  |
| 7895260 | --- | --- | --- | -0.090 | 0.940 | 8.01E-01 | 8.01E+01 |  |  |
| 7895261 | --- | --- | --- | -0.152 | 0.900 | 7.94E-01 | 7.94E+01 |  |  |
| 7895262 | --- | --- | --- | -0.229 | 0.853 | 3.70E-01 | 3.70E+01 |  |  |
| 7895263 | --- | --- | --- | 0.155  | 1.113 | 1.56E-01 | 1.56E+01 |  |  |
| 7895264 | --- | --- | --- | 0.344  | 1.269 | 1.51E-01 | 1.51E+01 |  |  |
| 7895267 | --- | --- | --- | -0.016 | 0.989 | 9.61E-01 | 9.61E+01 |  |  |



|         |     |     |     |        |       |          |          |  |  |
|---------|-----|-----|-----|--------|-------|----------|----------|--|--|
| 7895269 | --- | --- | --- | 0.011  | 1.008 | 9.64E-01 | 9.64E+01 |  |  |
| 7895271 | --- | --- | --- | 0.221  | 1.166 | 2.99E-02 | 2.99E+00 |  |  |
| 7895272 | --- | --- | --- | 0.032  | 1.022 | 7.94E-01 | 7.94E+01 |  |  |
| 7895273 | --- | --- | --- | -0.009 | 0.994 | 9.46E-01 | 9.46E+01 |  |  |
| 7895274 | --- | --- | --- | -0.025 | 0.983 | 9.04E-01 | 9.04E+01 |  |  |
| 7895275 | --- | --- | --- | -0.040 | 0.972 | 7.75E-01 | 7.75E+01 |  |  |
| 7895276 | --- | --- | --- | 0.297  | 1.228 | 3.40E-02 | 3.40E+00 |  |  |
| 7895277 | --- | --- | --- | 0.067  | 1.048 | 6.78E-01 | 6.78E+01 |  |  |
| 7895278 | --- | --- | --- | 0.137  | 1.100 | 7.16E-01 | 7.16E+01 |  |  |
| 7895279 | --- | --- | --- | 0.077  | 1.055 | 9.09E-01 | 9.09E+01 |  |  |
| 7895280 | --- | --- | --- | -0.023 | 0.984 | 9.38E-01 | 9.38E+01 |  |  |
| 7895282 | --- | --- | --- | -0.041 | 0.972 | 8.90E-01 | 8.90E+01 |  |  |
| 7895283 | --- | --- | --- | 0.139  | 1.101 | 5.64E-01 | 5.64E+01 |  |  |
| 7895284 | --- | --- | --- | 0.005  | 1.003 | 9.91E-01 | 9.91E+01 |  |  |
| 7895286 | --- | --- | --- | 0.240  | 1.181 | 6.00E-01 | 6.00E+01 |  |  |
| 7895287 | --- | --- | --- | 0.155  | 1.114 | 6.14E-01 | 6.14E+01 |  |  |
| 7895288 | --- | --- | --- | -0.101 | 0.932 | 6.67E-01 | 6.67E+01 |  |  |
| 7895289 | --- | --- | --- | -0.093 | 0.938 | 7.25E-01 | 7.25E+01 |  |  |
| 7895290 | --- | --- | --- | -0.046 | 0.968 | 8.03E-01 | 8.03E+01 |  |  |
| 7895291 | --- | --- | --- | 0.098  | 1.071 | 7.02E-01 | 7.02E+01 |  |  |
| 7895292 | --- | --- | --- | 0.050  | 1.035 | 9.28E-01 | 9.28E+01 |  |  |
| 7895293 | --- | --- | --- | 0.020  | 1.014 | 9.64E-01 | 9.64E+01 |  |  |
| 7895294 | --- | --- | --- | -0.103 | 0.931 | 8.76E-01 | 8.76E+01 |  |  |
| 7895295 | --- | --- | --- | 0.120  | 1.086 | 5.40E-01 | 5.40E+01 |  |  |
| 7895296 | --- | --- | --- | 0.194  | 1.144 | 6.24E-01 | 6.24E+01 |  |  |
| 7895297 | --- | --- | --- | 0.070  | 1.050 | 8.54E-01 | 8.54E+01 |  |  |
| 7895298 | --- | --- | --- | 0.039  | 1.028 | 8.81E-01 | 8.81E+01 |  |  |
| 7895299 | --- | --- | --- | 0.160  | 1.117 | 6.03E-01 | 6.03E+01 |  |  |
| 7895300 | --- | --- | --- | -0.003 | 0.998 | 9.97E-01 | 9.97E+01 |  |  |
| 7895301 | --- | --- | --- | 0.013  | 1.009 | 9.87E-01 | 9.87E+01 |  |  |
| 7895303 | --- | --- | --- | 0.096  | 1.069 | 7.16E-01 | 7.16E+01 |  |  |
| 7895304 | --- | --- | --- | -0.016 | 0.989 | 9.67E-01 | 9.67E+01 |  |  |
| 7895305 | --- | --- | --- | -0.004 | 0.997 | 9.90E-01 | 9.90E+01 |  |  |
| 7895306 | --- | --- | --- | 0.015  | 1.010 | 9.44E-01 | 9.44E+01 |  |  |
| 7895308 | --- | --- | --- | -0.040 | 0.973 | 8.70E-01 | 8.70E+01 |  |  |
| 7895310 | --- | --- | --- | 0.040  | 1.028 | 7.78E-01 | 7.78E+01 |  |  |
| 7895312 | --- | --- | --- | -0.037 | 0.975 | 9.37E-01 | 9.37E+01 |  |  |
| 7895316 | --- | --- | --- | -0.172 | 0.888 | 4.13E-01 | 4.13E+01 |  |  |
| 7895317 | --- | --- | --- | -0.035 | 0.976 | 8.41E-01 | 8.41E+01 |  |  |
| 7895318 | --- | --- | --- | 0.201  | 1.150 | 5.77E-01 | 5.77E+01 |  |  |
| 7895319 | --- | --- | --- | -0.217 | 0.861 | 5.17E-01 | 5.17E+01 |  |  |
| 7895320 | --- | --- | --- | 0.077  | 1.055 | 7.67E-01 | 7.67E+01 |  |  |
| 7895322 | --- | --- | --- | -0.019 | 0.987 | 9.43E-01 | 9.43E+01 |  |  |
| 7895323 | --- | --- | --- | 0.032  | 1.022 | 8.31E-01 | 8.31E+01 |  |  |
| 7895324 | --- | --- | --- | 0.016  | 1.011 | 9.61E-01 | 9.61E+01 |  |  |
| 7895325 | --- | --- | --- | -0.056 | 0.962 | 7.87E-01 | 7.87E+01 |  |  |
| 7895326 | --- | --- | --- | 0.032  | 1.023 | 8.17E-01 | 8.17E+01 |  |  |
| 7895328 | --- | --- | --- | -0.066 | 0.955 | 7.01E-01 | 7.01E+01 |  |  |
| 7895329 | --- | --- | --- | -0.122 | 0.919 | 6.05E-01 | 6.05E+01 |  |  |
| 7895330 | --- | --- | --- | 0.011  | 1.007 | 9.73E-01 | 9.73E+01 |  |  |
| 7895332 | --- | --- | --- | -0.083 | 0.944 | 8.62E-01 | 8.62E+01 |  |  |
| 7895333 | --- | --- | --- | 0.037  | 1.026 | 6.57E-01 | 6.57E+01 |  |  |
| 7895334 | --- | --- | --- | 0.229  | 1.172 | 1.95E-01 | 1.95E+01 |  |  |
| 7895336 | --- | --- | --- | -0.002 | 0.999 | 9.91E-01 | 9.91E+01 |  |  |
| 7895337 | --- | --- | --- | 0.078  | 1.056 | 7.91E-01 | 7.91E+01 |  |  |
| 7895340 | --- | --- | --- | -0.075 | 0.949 | 8.88E-01 | 8.88E+01 |  |  |
| 7895342 | --- | --- | --- | 0.027  | 1.019 | 8.50E-01 | 8.50E+01 |  |  |
| 7895343 | --- | --- | --- | 0.007  | 1.005 | 9.64E-01 | 9.64E+01 |  |  |
| 7895344 | --- | --- | --- | -0.223 | 0.857 | 7.03E-01 | 7.03E+01 |  |  |
| 7895345 | --- | --- | --- | 0.152  | 1.111 | 6.62E-01 | 6.62E+01 |  |  |
| 7895346 | --- | --- | --- | -0.210 | 0.864 | 6.19E-01 | 6.19E+01 |  |  |
| 7895347 | --- | --- | --- | 0.056  | 1.039 | 9.48E-01 | 9.48E+01 |  |  |
| 7895348 | --- | --- | --- | 0.011  | 1.008 | 9.85E-01 | 9.85E+01 |  |  |
| 7895349 | --- | --- | --- | 0.094  | 1.067 | 9.35E-01 | 9.35E+01 |  |  |
| 7895350 | --- | --- | --- | 0.019  | 1.013 | 9.33E-01 | 9.33E+01 |  |  |
| 7895351 | --- | --- | --- | 0.118  | 1.085 | 7.95E-01 | 7.95E+01 |  |  |
| 7895354 | --- | --- | --- | 0.047  | 1.033 | 5.93E-01 | 5.93E+01 |  |  |
| 7895356 | --- | --- | --- | -0.120 | 0.920 | 7.01E-01 | 7.01E+01 |  |  |
| 7895357 | --- | --- | --- | 0.063  | 1.045 | 7.89E-01 | 7.89E+01 |  |  |
| 7895358 | --- | --- | --- | 0.044  | 1.031 | 7.25E-01 | 7.25E+01 |  |  |
| 7895359 | --- | --- | --- | -0.068 | 0.954 | 8.00E-01 | 8.00E+01 |  |  |
| 7895360 | --- | --- | --- | 0.038  | 1.027 | 8.70E-01 | 8.70E+01 |  |  |
| 7895361 | --- | --- | --- | 0.029  | 1.020 | 9.56E-01 | 9.56E+01 |  |  |
| 7895362 | --- | --- | --- | 0.040  | 1.028 | 8.89E-01 | 8.89E+01 |  |  |
| 7895365 | --- | --- | --- | -0.017 | 0.989 | 9.57E-01 | 9.57E+01 |  |  |
| 7895368 | --- | --- | --- | -0.093 | 0.938 | 5.35E-01 | 5.35E+01 |  |  |
| 7895370 | --- | --- | --- | 0.046  | 1.033 | 9.05E-01 | 9.05E+01 |  |  |

|         |     |     |     |        |       |          |          |  |  |
|---------|-----|-----|-----|--------|-------|----------|----------|--|--|
| 7895373 | --- | --- | --- | -0.037 | 0.975 | 7.75E-01 | 7.75E+01 |  |  |
| 7895374 | --- | --- | --- | 0.046  | 1.032 | 6.59E-01 | 6.59E+01 |  |  |
| 7895375 | --- | --- | --- | 0.044  | 1.031 | 9.12E-01 | 9.12E+01 |  |  |
| 7895376 | --- | --- | --- | 0.001  | 1.001 | 9.92E-01 | 9.92E+01 |  |  |
| 7895379 | --- | --- | --- | 0.004  | 1.003 | 9.88E-01 | 9.88E+01 |  |  |
| 7895382 | --- | --- | --- | 0.015  | 1.011 | 9.77E-01 | 9.77E+01 |  |  |
| 7895387 | --- | --- | --- | -0.131 | 0.913 | 6.70E-01 | 6.70E+01 |  |  |
| 7895388 | --- | --- | --- | 0.046  | 1.032 | 9.18E-01 | 9.18E+01 |  |  |
| 7895390 | --- | --- | --- | -0.132 | 0.913 | 6.94E-01 | 6.94E+01 |  |  |
| 7895391 | --- | --- | --- | 0.012  | 1.008 | 9.36E-01 | 9.36E+01 |  |  |
| 7895392 | --- | --- | --- | 0.082  | 1.059 | 2.68E-01 | 2.68E+01 |  |  |
| 7895393 | --- | --- | --- | 0.017  | 1.012 | 9.27E-01 | 9.27E+01 |  |  |
| 7895395 | --- | --- | --- | 0.042  | 1.030 | 9.24E-01 | 9.24E+01 |  |  |
| 7895397 | --- | --- | --- | 0.121  | 1.087 | 7.70E-01 | 7.70E+01 |  |  |
| 7895398 | --- | --- | --- | 0.058  | 1.041 | 6.78E-01 | 6.78E+01 |  |  |
| 7895399 | --- | --- | --- | -0.099 | 0.934 | 8.23E-01 | 8.23E+01 |  |  |
| 7895400 | --- | --- | --- | -0.197 | 0.873 | 2.05E-01 | 2.05E+01 |  |  |
| 7895403 | --- | --- | --- | -0.054 | 0.963 | 8.56E-01 | 8.56E+01 |  |  |
| 7895404 | --- | --- | --- | -0.106 | 0.929 | 8.77E-01 | 8.77E+01 |  |  |
| 7895405 | --- | --- | --- | 0.039  | 1.028 | 9.52E-01 | 9.52E+01 |  |  |
| 7895406 | --- | --- | --- | -0.026 | 0.982 | 8.36E-01 | 8.36E+01 |  |  |
| 7895408 | --- | --- | --- | -0.040 | 0.973 | 9.49E-01 | 9.49E+01 |  |  |
| 7895409 | --- | --- | --- | 0.290  | 1.223 | 4.33E-01 | 4.33E+01 |  |  |
| 7895410 | --- | --- | --- | 0.141  | 1.103 | 6.70E-01 | 6.70E+01 |  |  |
| 7895411 | --- | --- | --- | 0.025  | 1.018 | 9.36E-01 | 9.36E+01 |  |  |
| 7895412 | --- | --- | --- | 0.156  | 1.114 | 5.53E-01 | 5.53E+01 |  |  |
| 7895414 | --- | --- | --- | -0.113 | 0.925 | 2.15E-01 | 2.15E+01 |  |  |
| 7895416 | --- | --- | --- | 0.069  | 1.049 | 7.82E-01 | 7.82E+01 |  |  |
| 7895418 | --- | --- | --- | -0.094 | 0.937 | 7.76E-01 | 7.76E+01 |  |  |
| 7895419 | --- | --- | --- | 0.044  | 1.031 | 8.43E-01 | 8.43E+01 |  |  |
| 7895421 | --- | --- | --- | -0.021 | 0.986 | 9.76E-01 | 9.76E+01 |  |  |
| 7895422 | --- | --- | --- | -0.058 | 0.960 | 9.35E-01 | 9.35E+01 |  |  |
| 7895424 | --- | --- | --- | 0.295  | 1.227 | 3.63E-01 | 3.63E+01 |  |  |
| 7895425 | --- | --- | --- | -0.100 | 0.933 | 7.04E-01 | 7.04E+01 |  |  |
| 7895427 | --- | --- | --- | -0.037 | 0.975 | 8.67E-01 | 8.67E+01 |  |  |
| 7895428 | --- | --- | --- | -0.054 | 0.963 | 9.54E-01 | 9.54E+01 |  |  |
| 7895429 | --- | --- | --- | -0.059 | 0.960 | 9.09E-01 | 9.09E+01 |  |  |
| 7895432 | --- | --- | --- | -0.016 | 0.989 | 9.86E-01 | 9.86E+01 |  |  |
| 7895433 | --- | --- | --- | -0.176 | 0.885 | 5.26E-01 | 5.26E+01 |  |  |
| 7895434 | --- | --- | --- | -0.037 | 0.974 | 9.51E-01 | 9.51E+01 |  |  |
| 7895435 | --- | --- | --- | 0.013  | 1.009 | 9.58E-01 | 9.58E+01 |  |  |
| 7895437 | --- | --- | --- | 0.044  | 1.031 | 9.50E-01 | 9.50E+01 |  |  |
| 7895439 | --- | --- | --- | -0.147 | 0.903 | 5.68E-01 | 5.68E+01 |  |  |
| 7895440 | --- | --- | --- | -0.009 | 0.994 | 9.72E-01 | 9.72E+01 |  |  |
| 7895441 | --- | --- | --- | 0.138  | 1.100 | 5.63E-01 | 5.63E+01 |  |  |
| 7895442 | --- | --- | --- | 0.329  | 1.257 | 7.73E-02 | 7.73E+00 |  |  |
| 7895444 | --- | --- | --- | 0.093  | 1.067 | 5.70E-01 | 5.70E+01 |  |  |
| 7895445 | --- | --- | --- | 0.118  | 1.085 | 8.09E-01 | 8.09E+01 |  |  |
| 7895446 | --- | --- | --- | -0.092 | 0.939 | 8.05E-01 | 8.05E+01 |  |  |
| 7895447 | --- | --- | --- | 0.146  | 1.106 | 5.18E-01 | 5.18E+01 |  |  |
| 7895449 | --- | --- | --- | 0.173  | 1.128 | 4.13E-01 | 4.13E+01 |  |  |
| 7895450 | --- | --- | --- | -0.009 | 0.993 | 9.89E-01 | 9.89E+01 |  |  |
| 7895451 | --- | --- | --- | 0.047  | 1.033 | 7.14E-01 | 7.14E+01 |  |  |
| 7895452 | --- | --- | --- | 0.053  | 1.037 | 8.78E-01 | 8.78E+01 |  |  |
| 7895453 | --- | --- | --- | 0.203  | 1.151 | 7.68E-01 | 7.68E+01 |  |  |
| 7895456 | --- | --- | --- | 0.074  | 1.052 | 9.54E-01 | 9.54E+01 |  |  |
| 7895457 | --- | --- | --- | 0.437  | 1.353 | 4.51E-01 | 4.51E+01 |  |  |
| 7895458 | --- | --- | --- | 0.033  | 1.023 | 9.70E-01 | 9.70E+01 |  |  |
| 7895460 | --- | --- | --- | 0.292  | 1.224 | 4.04E-01 | 4.04E+01 |  |  |
| 7895461 | --- | --- | --- | -0.035 | 0.976 | 9.00E-01 | 9.00E+01 |  |  |
| 7895463 | --- | --- | --- | 0.004  | 1.003 | 9.84E-01 | 9.84E+01 |  |  |
| 7895464 | --- | --- | --- | 0.020  | 1.014 | 9.24E-01 | 9.24E+01 |  |  |
| 7895465 | --- | --- | --- | -0.111 | 0.926 | 7.55E-01 | 7.55E+01 |  |  |
| 7895467 | --- | --- | --- | -0.272 | 0.828 | 3.57E-01 | 3.57E+01 |  |  |
| 7895470 | --- | --- | --- | 0.025  | 1.017 | 9.49E-01 | 9.49E+01 |  |  |
| 7895471 | --- | --- | --- | 0.092  | 1.066 | 8.13E-01 | 8.13E+01 |  |  |
| 7895472 | --- | --- | --- | -0.045 | 0.969 | 8.16E-01 | 8.16E+01 |  |  |
| 7895475 | --- | --- | --- | 0.097  | 1.070 | 3.94E-01 | 3.94E+01 |  |  |
| 7895476 | --- | --- | --- | -0.062 | 0.958 | 6.80E-01 | 6.80E+01 |  |  |
| 7895477 | --- | --- | --- | 0.086  | 1.061 | 7.45E-01 | 7.45E+01 |  |  |
| 7895478 | --- | --- | --- | 0.091  | 1.065 | 7.52E-01 | 7.52E+01 |  |  |
| 7895480 | --- | --- | --- | -0.468 | 0.723 | 2.33E-01 | 2.33E+01 |  |  |
| 7895481 | --- | --- | --- | -0.018 | 0.988 | 9.53E-01 | 9.53E+01 |  |  |
| 7895483 | --- | --- | --- | 0.001  | 1.001 | 9.96E-01 | 9.96E+01 |  |  |
| 7895484 | --- | --- | --- | 0.113  | 1.081 | 7.15E-01 | 7.15E+01 |  |  |
| 7895486 | --- | --- | --- | -0.044 | 0.970 | 8.69E-01 | 8.69E+01 |  |  |
| 7895488 | --- | --- | --- | 0.044  | 1.031 | 9.03E-01 | 9.03E+01 |  |  |

|         |     |     |     |        |       |          |          |  |  |
|---------|-----|-----|-----|--------|-------|----------|----------|--|--|
| 7895489 | --- | --- | --- | -0.058 | 0.960 | 8.73E-01 | 8.73E+01 |  |  |
| 7895490 | --- | --- | --- | -0.107 | 0.929 | 4.99E-01 | 4.99E+01 |  |  |
| 7895491 | --- | --- | --- | 0.187  | 1.139 | 8.57E-01 | 8.57E+01 |  |  |
| 7895492 | --- | --- | --- | 0.273  | 1.208 | 1.97E-01 | 1.97E+01 |  |  |
| 7895494 | --- | --- | --- | 0.426  | 1.343 | 5.79E-01 | 5.79E+01 |  |  |
| 7895495 | --- | --- | --- | 0.005  | 1.003 | 9.88E-01 | 9.88E+01 |  |  |
| 7895496 | --- | --- | --- | 0.028  | 1.020 | 8.46E-01 | 8.46E+01 |  |  |
| 7895497 | --- | --- | --- | 0.008  | 1.006 | 9.65E-01 | 9.65E+01 |  |  |
| 7895498 | --- | --- | --- | 0.024  | 1.017 | 9.43E-01 | 9.43E+01 |  |  |
| 7895499 | --- | --- | --- | 0.088  | 1.063 | 8.50E-01 | 8.50E+01 |  |  |
| 7895501 | --- | --- | --- | -0.053 | 0.964 | 9.21E-01 | 9.21E+01 |  |  |
| 7895503 | --- | --- | --- | -0.055 | 0.963 | 9.15E-01 | 9.15E+01 |  |  |
| 7895506 | --- | --- | --- | -0.016 | 0.989 | 9.53E-01 | 9.53E+01 |  |  |
| 7895507 | --- | --- | --- | -0.014 | 0.990 | 9.86E-01 | 9.86E+01 |  |  |
| 7895508 | --- | --- | --- | -0.044 | 0.970 | 7.96E-01 | 7.96E+01 |  |  |
| 7895509 | --- | --- | --- | -0.048 | 0.967 | 8.66E-01 | 8.66E+01 |  |  |
| 7895510 | --- | --- | --- | 0.014  | 1.010 | 9.62E-01 | 9.62E+01 |  |  |
| 7895511 | --- | --- | --- | 0.163  | 1.120 | 7.41E-01 | 7.41E+01 |  |  |
| 7895512 | --- | --- | --- | -0.155 | 0.898 | 6.93E-01 | 6.93E+01 |  |  |
| 7895514 | --- | --- | --- | 0.036  | 1.025 | 6.35E-01 | 6.35E+01 |  |  |
| 7895515 | --- | --- | --- | -0.010 | 0.993 | 9.76E-01 | 9.76E+01 |  |  |
| 7895517 | --- | --- | --- | 0.042  | 1.029 | 6.99E-01 | 6.99E+01 |  |  |
| 7895518 | --- | --- | --- | -0.033 | 0.978 | 9.01E-01 | 9.01E+01 |  |  |
| 7895519 | --- | --- | --- | -0.001 | 0.999 | 9.97E-01 | 9.97E+01 |  |  |
| 7895520 | --- | --- | --- | -0.012 | 0.992 | 8.85E-01 | 8.85E+01 |  |  |
| 7895521 | --- | --- | --- | -0.012 | 0.992 | 9.47E-01 | 9.47E+01 |  |  |
| 7895522 | --- | --- | --- | 0.021  | 1.015 | 9.39E-01 | 9.39E+01 |  |  |
| 7895525 | --- | --- | --- | -0.107 | 0.928 | 3.95E-01 | 3.95E+01 |  |  |
| 7895528 | --- | --- | --- | 0.046  | 1.033 | 9.25E-01 | 9.25E+01 |  |  |
| 7895530 | --- | --- | --- | 0.094  | 1.067 | 8.66E-01 | 8.66E+01 |  |  |
| 7895531 | --- | --- | --- | 0.079  | 1.057 | 8.06E-01 | 8.06E+01 |  |  |
| 7895532 | --- | --- | --- | -0.159 | 0.896 | 4.88E-01 | 4.88E+01 |  |  |
| 7895536 | --- | --- | --- | 0.004  | 1.003 | 9.88E-01 | 9.88E+01 |  |  |
| 7895537 | --- | --- | --- | 0.145  | 1.105 | 7.72E-01 | 7.72E+01 |  |  |
| 7895538 | --- | --- | --- | -0.032 | 0.978 | 7.59E-01 | 7.59E+01 |  |  |
| 7895539 | --- | --- | --- | -0.039 | 0.973 | 9.08E-01 | 9.08E+01 |  |  |
| 7895540 | --- | --- | --- | -0.007 | 0.995 | 9.88E-01 | 9.88E+01 |  |  |
| 7895541 | --- | --- | --- | -0.096 | 0.936 | 6.94E-01 | 6.94E+01 |  |  |
| 7895542 | --- | --- | --- | 0.021  | 1.015 | 9.53E-01 | 9.53E+01 |  |  |
| 7895544 | --- | --- | --- | 0.111  | 1.080 | 6.89E-01 | 6.89E+01 |  |  |
| 7895545 | --- | --- | --- | -0.092 | 0.938 | 3.46E-01 | 3.46E+01 |  |  |
| 7895547 | --- | --- | --- | 0.284  | 1.218 | 2.10E-01 | 2.10E+01 |  |  |
| 7895548 | --- | --- | --- | -0.033 | 0.977 | 9.55E-01 | 9.55E+01 |  |  |
| 7895550 | --- | --- | --- | 0.029  | 1.021 | 9.63E-01 | 9.63E+01 |  |  |
| 7895551 | --- | --- | --- | -0.034 | 0.977 | 8.31E-01 | 8.31E+01 |  |  |
| 7895552 | --- | --- | --- | 0.458  | 1.373 | 4.19E-01 | 4.19E+01 |  |  |
| 7895554 | --- | --- | --- | -0.046 | 0.968 | 6.25E-01 | 6.25E+01 |  |  |
| 7895555 | --- | --- | --- | -0.064 | 0.957 | 9.50E-01 | 9.50E+01 |  |  |
| 7895556 | --- | --- | --- | -0.054 | 0.963 | 7.79E-01 | 7.79E+01 |  |  |
| 7895557 | --- | --- | --- | -0.010 | 0.993 | 9.50E-01 | 9.50E+01 |  |  |
| 7895558 | --- | --- | --- | 0.188  | 1.139 | 4.60E-01 | 4.60E+01 |  |  |
| 7895559 | --- | --- | --- | -0.029 | 0.980 | 9.10E-01 | 9.10E+01 |  |  |
| 7895561 | --- | --- | --- | -0.078 | 0.947 | 7.40E-01 | 7.40E+01 |  |  |
| 7895562 | --- | --- | --- | 0.280  | 1.215 | 5.63E-01 | 5.63E+01 |  |  |
| 7895563 | --- | --- | --- | -0.038 | 0.974 | 9.09E-01 | 9.09E+01 |  |  |
| 7895565 | --- | --- | --- | 0.110  | 1.079 | 8.76E-01 | 8.76E+01 |  |  |
| 7895566 | --- | --- | --- | 0.038  | 1.027 | 9.53E-01 | 9.53E+01 |  |  |
| 7895570 | --- | --- | --- | 0.021  | 1.014 | 9.77E-01 | 9.77E+01 |  |  |
| 7895571 | --- | --- | --- | 0.008  | 1.006 | 9.89E-01 | 9.89E+01 |  |  |
| 7895574 | --- | --- | --- | 0.002  | 1.001 | 9.94E-01 | 9.94E+01 |  |  |
| 7895575 | --- | --- | --- | 0.107  | 1.077 | 8.47E-01 | 8.47E+01 |  |  |
| 7895576 | --- | --- | --- | 0.116  | 1.084 | 7.57E-01 | 7.57E+01 |  |  |
| 7895577 | --- | --- | --- | 0.017  | 1.012 | 9.61E-01 | 9.61E+01 |  |  |
| 7895578 | --- | --- | --- | 0.065  | 1.046 | 8.10E-01 | 8.10E+01 |  |  |
| 7895579 | --- | --- | --- | 0.057  | 1.040 | 7.03E-01 | 7.03E+01 |  |  |
| 7895583 | --- | --- | --- | -0.042 | 0.971 | 9.42E-01 | 9.42E+01 |  |  |
| 7895584 | --- | --- | --- | -0.417 | 0.749 | 5.02E-01 | 5.02E+01 |  |  |
| 7895585 | --- | --- | --- | -0.044 | 0.970 | 7.97E-01 | 7.97E+01 |  |  |
| 7895586 | --- | --- | --- | 0.093  | 1.066 | 7.87E-01 | 7.87E+01 |  |  |
| 7895587 | --- | --- | --- | 0.036  | 1.025 | 6.70E-01 | 6.70E+01 |  |  |
| 7895588 | --- | --- | --- | 0.098  | 1.070 | 5.89E-01 | 5.89E+01 |  |  |
| 7895589 | --- | --- | --- | -0.192 | 0.875 | 8.02E-01 | 8.02E+01 |  |  |
| 7895590 | --- | --- | --- | 0.034  | 1.024 | 8.35E-01 | 8.35E+01 |  |  |
| 7895592 | --- | --- | --- | 0.182  | 1.135 | 6.14E-01 | 6.14E+01 |  |  |
| 7895595 | --- | --- | --- | 0.034  | 1.024 | 8.31E-01 | 8.31E+01 |  |  |
| 7895596 | --- | --- | --- | -0.077 | 0.948 | 5.02E-01 | 5.02E+01 |  |  |
| 7895597 | --- | --- | --- | -0.173 | 0.887 | 5.25E-01 | 5.25E+01 |  |  |

|         |     |     |     |        |       |          |          |  |  |
|---------|-----|-----|-----|--------|-------|----------|----------|--|--|
| 7895598 | --- | --- | --- | 0.079  | 1.056 | 6.24E-01 | 6.24E+01 |  |  |
| 7895599 | --- | --- | --- | -0.030 | 0.979 | 8.86E-01 | 8.86E+01 |  |  |
| 7895600 | --- | --- | --- | 0.240  | 1.181 | 5.12E-01 | 5.12E+01 |  |  |
| 7895601 | --- | --- | --- | 0.000  | 1.000 | 1.00E+00 | 1.00E+02 |  |  |
| 7895602 | --- | --- | --- | 0.053  | 1.038 | 8.30E-01 | 8.30E+01 |  |  |
| 7895603 | --- | --- | --- | 0.106  | 1.076 | 7.69E-01 | 7.69E+01 |  |  |
| 7895604 | --- | --- | --- | 0.021  | 1.015 | 9.64E-01 | 9.64E+01 |  |  |
| 7895605 | --- | --- | --- | 0.219  | 1.164 | 4.25E-01 | 4.25E+01 |  |  |
| 7895606 | --- | --- | --- | -0.037 | 0.975 | 8.06E-01 | 8.06E+01 |  |  |
| 7895608 | --- | --- | --- | 0.055  | 1.039 | 8.68E-01 | 8.68E+01 |  |  |
| 7895609 | --- | --- | --- | 0.072  | 1.051 | 8.08E-01 | 8.08E+01 |  |  |
| 7895610 | --- | --- | --- | 0.015  | 1.010 | 9.73E-01 | 9.73E+01 |  |  |
| 7895611 | --- | --- | --- | 0.316  | 1.245 | 4.87E-01 | 4.87E+01 |  |  |
| 7895612 | --- | --- | --- | 0.009  | 1.006 | 9.90E-01 | 9.90E+01 |  |  |
| 7895614 | --- | --- | --- | 0.203  | 1.151 | 3.47E-01 | 3.47E+01 |  |  |
| 7895616 | --- | --- | --- | -0.091 | 0.939 | 5.06E-01 | 5.06E+01 |  |  |
| 7895618 | --- | --- | --- | 0.106  | 1.076 | 8.60E-01 | 8.60E+01 |  |  |
| 7895619 | --- | --- | --- | 0.054  | 1.038 | 8.65E-01 | 8.65E+01 |  |  |
| 7895620 | --- | --- | --- | 0.009  | 1.006 | 9.84E-01 | 9.84E+01 |  |  |
| 7895621 | --- | --- | --- | 0.022  | 1.015 | 8.66E-01 | 8.66E+01 |  |  |
| 7895622 | --- | --- | --- | 0.034  | 1.024 | 8.63E-01 | 8.63E+01 |  |  |
| 7895624 | --- | --- | --- | -0.119 | 0.921 | 8.69E-01 | 8.69E+01 |  |  |
| 7895625 | --- | --- | --- | 0.018  | 1.013 | 9.78E-01 | 9.78E+01 |  |  |
| 7895626 | --- | --- | --- | -0.056 | 0.962 | 7.51E-01 | 7.51E+01 |  |  |
| 7895627 | --- | --- | --- | -0.048 | 0.967 | 7.30E-01 | 7.30E+01 |  |  |
| 7895629 | --- | --- | --- | 0.051  | 1.036 | 8.15E-01 | 8.15E+01 |  |  |
| 7895630 | --- | --- | --- | 0.080  | 1.057 | 7.63E-01 | 7.63E+01 |  |  |
| 7895631 | --- | --- | --- | 0.167  | 1.123 | 7.62E-01 | 7.62E+01 |  |  |
| 7895632 | --- | --- | --- | 0.066  | 1.047 | 7.61E-01 | 7.61E+01 |  |  |
| 7895637 | --- | --- | --- | -0.133 | 0.912 | 7.55E-01 | 7.55E+01 |  |  |
| 7895638 | --- | --- | --- | -0.219 | 0.859 | 7.73E-01 | 7.73E+01 |  |  |
| 7895640 | --- | --- | --- | 0.025  | 1.017 | 9.33E-01 | 9.33E+01 |  |  |
| 7895641 | --- | --- | --- | -0.134 | 0.911 | 6.59E-01 | 6.59E+01 |  |  |
| 7895642 | --- | --- | --- | 0.028  | 1.020 | 9.34E-01 | 9.34E+01 |  |  |
| 7895643 | --- | --- | --- | -0.062 | 0.958 | 8.05E-01 | 8.05E+01 |  |  |
| 7895645 | --- | --- | --- | 0.080  | 1.057 | 8.10E-01 | 8.10E+01 |  |  |
| 7895647 | --- | --- | --- | -0.002 | 0.999 | 9.95E-01 | 9.95E+01 |  |  |
| 7895649 | --- | --- | --- | 0.125  | 1.090 | 5.41E-01 | 5.41E+01 |  |  |
| 7895650 | --- | --- | --- | -0.066 | 0.955 | 9.24E-01 | 9.24E+01 |  |  |
| 7895651 | --- | --- | --- | -0.151 | 0.901 | 3.09E-01 | 3.09E+01 |  |  |
| 7895652 | --- | --- | --- | 0.070  | 1.050 | 5.89E-01 | 5.89E+01 |  |  |
| 7895654 | --- | --- | --- | 0.019  | 1.013 | 9.57E-01 | 9.57E+01 |  |  |
| 7895656 | --- | --- | --- | 0.033  | 1.023 | 8.45E-01 | 8.45E+01 |  |  |
| 7895657 | --- | --- | --- | 0.051  | 1.036 | 7.52E-01 | 7.52E+01 |  |  |
| 7895658 | --- | --- | --- | 0.062  | 1.044 | 8.84E-01 | 8.84E+01 |  |  |
| 7895659 | --- | --- | --- | 0.077  | 1.055 | 4.71E-01 | 4.71E+01 |  |  |
| 7895661 | --- | --- | --- | -0.038 | 0.974 | 7.56E-01 | 7.56E+01 |  |  |
| 7895662 | --- | --- | --- | 0.074  | 1.052 | 6.63E-01 | 6.63E+01 |  |  |
| 7895663 | --- | --- | --- | 0.139  | 1.101 | 6.14E-01 | 6.14E+01 |  |  |
| 7895664 | --- | --- | --- | 0.071  | 1.051 | 8.48E-01 | 8.48E+01 |  |  |
| 7895665 | --- | --- | --- | -0.005 | 0.996 | 9.85E-01 | 9.85E+01 |  |  |
| 7895666 | --- | --- | --- | -0.097 | 0.935 | 8.53E-01 | 8.53E+01 |  |  |
| 7895669 | --- | --- | --- | 0.063  | 1.044 | 8.42E-01 | 8.42E+01 |  |  |
| 7895672 | --- | --- | --- | 0.066  | 1.047 | 8.91E-01 | 8.91E+01 |  |  |
| 7895674 | --- | --- | --- | -0.005 | 0.997 | 9.84E-01 | 9.84E+01 |  |  |
| 7895675 | --- | --- | --- | 0.008  | 1.006 | 9.87E-01 | 9.87E+01 |  |  |
| 7895676 | --- | --- | --- | -0.049 | 0.967 | 7.87E-01 | 7.87E+01 |  |  |
| 7895677 | --- | --- | --- | -0.125 | 0.917 | 8.04E-01 | 8.04E+01 |  |  |
| 7895680 | --- | --- | --- | 0.025  | 1.017 | 8.69E-01 | 8.69E+01 |  |  |
| 7895681 | --- | --- | --- | 0.103  | 1.074 | 7.78E-01 | 7.78E+01 |  |  |
| 7895682 | --- | --- | --- | -0.100 | 0.933 | 9.11E-01 | 9.11E+01 |  |  |
| 7895684 | --- | --- | --- | 0.043  | 1.030 | 9.04E-01 | 9.04E+01 |  |  |
| 7895685 | --- | --- | --- | -0.110 | 0.927 | 5.12E-01 | 5.12E+01 |  |  |
| 7895686 | --- | --- | --- | 0.154  | 1.113 | 7.02E-01 | 7.02E+01 |  |  |
| 7895687 | --- | --- | --- | -0.040 | 0.973 | 6.92E-01 | 6.92E+01 |  |  |
| 7895688 | --- | --- | --- | 0.044  | 1.031 | 8.35E-01 | 8.35E+01 |  |  |
| 7895690 | --- | --- | --- | 0.026  | 1.019 | 8.74E-01 | 8.74E+01 |  |  |
| 7895691 | --- | --- | --- | 0.126  | 1.091 | 1.55E-01 | 1.55E+01 |  |  |
| 7895692 | --- | --- | --- | 0.049  | 1.035 | 8.21E-01 | 8.21E+01 |  |  |
| 7895693 | --- | --- | --- | 0.098  | 1.070 | 4.75E-01 | 4.75E+01 |  |  |
| 7895694 | --- | --- | --- | 0.062  | 1.044 | 7.64E-01 | 7.64E+01 |  |  |
| 7895695 | --- | --- | --- | -0.010 | 0.993 | 9.80E-01 | 9.80E+01 |  |  |
| 7895697 | --- | --- | --- | 0.053  | 1.037 | 8.09E-01 | 8.09E+01 |  |  |
| 7895704 | --- | --- | --- | -0.043 | 0.971 | 7.94E-01 | 7.94E+01 |  |  |
| 7895705 | --- | --- | --- | 0.063  | 1.045 | 5.13E-01 | 5.13E+01 |  |  |
| 7895706 | --- | --- | --- | -0.108 | 0.928 | 7.96E-01 | 7.96E+01 |  |  |
| 7895707 | --- | --- | --- | -0.037 | 0.975 | 9.53E-01 | 9.53E+01 |  |  |

|         |     |     |     |        |       |          |          |  |  |
|---------|-----|-----|-----|--------|-------|----------|----------|--|--|
| 7895708 | --- | --- | --- | 0.058  | 1.041 | 9.12E-01 | 9.12E+01 |  |  |
| 7895710 | --- | --- | --- | 0.063  | 1.045 | 4.59E-01 | 4.59E+01 |  |  |
| 7895711 | --- | --- | --- | 0.064  | 1.045 | 8.62E-01 | 8.62E+01 |  |  |
| 7895712 | --- | --- | --- | 0.056  | 1.040 | 7.40E-01 | 7.40E+01 |  |  |
| 7895713 | --- | --- | --- | -0.106 | 0.929 | 9.13E-01 | 9.13E+01 |  |  |
| 7895714 | --- | --- | --- | 0.028  | 1.020 | 8.35E-01 | 8.35E+01 |  |  |
| 7895715 | --- | --- | --- | 0.059  | 1.042 | 8.76E-01 | 8.76E+01 |  |  |
| 7895716 | --- | --- | --- | 0.019  | 1.013 | 9.49E-01 | 9.49E+01 |  |  |
| 7895717 | --- | --- | --- | 0.013  | 1.009 | 9.56E-01 | 9.56E+01 |  |  |
| 7895718 | --- | --- | --- | 0.064  | 1.046 | 8.57E-01 | 8.57E+01 |  |  |
| 7895719 | --- | --- | --- | 0.017  | 1.012 | 9.56E-01 | 9.56E+01 |  |  |
| 7895721 | --- | --- | --- | 0.081  | 1.058 | 6.76E-01 | 6.76E+01 |  |  |
| 7895722 | --- | --- | --- | -0.036 | 0.975 | 9.64E-01 | 9.64E+01 |  |  |
| 7895723 | --- | --- | --- | 0.103  | 1.074 | 8.02E-01 | 8.02E+01 |  |  |
| 7895724 | --- | --- | --- | 0.044  | 1.031 | 8.88E-01 | 8.88E+01 |  |  |
| 7895726 | --- | --- | --- | -0.102 | 0.932 | 4.20E-01 | 4.20E+01 |  |  |
| 7895727 | --- | --- | --- | 0.148  | 1.108 | 5.20E-01 | 5.20E+01 |  |  |
| 7895728 | --- | --- | --- | -0.113 | 0.925 | 7.77E-01 | 7.77E+01 |  |  |
| 7895729 | --- | --- | --- | 0.116  | 1.084 | 6.31E-01 | 6.31E+01 |  |  |
| 7895731 | --- | --- | --- | -0.238 | 0.848 | 5.64E-01 | 5.64E+01 |  |  |
| 7895732 | --- | --- | --- | -0.044 | 0.970 | 8.34E-01 | 8.34E+01 |  |  |
| 7895733 | --- | --- | --- | 0.057  | 1.040 | 8.78E-01 | 8.78E+01 |  |  |
| 7895734 | --- | --- | --- | 0.096  | 1.069 | 8.15E-01 | 8.15E+01 |  |  |
| 7895735 | --- | --- | --- | -0.188 | 0.878 | 5.82E-01 | 5.82E+01 |  |  |
| 7895736 | --- | --- | --- | -0.074 | 0.950 | 6.95E-01 | 6.95E+01 |  |  |
| 7895737 | --- | --- | --- | -0.158 | 0.896 | 5.76E-01 | 5.76E+01 |  |  |
| 7895738 | --- | --- | --- | -0.585 | 0.667 | 5.18E-02 | 5.18E+00 |  |  |
| 7895739 | --- | --- | --- | 0.016  | 1.011 | 9.86E-01 | 9.86E+01 |  |  |
| 7895740 | --- | --- | --- | -0.194 | 0.874 | 4.04E-01 | 4.04E+01 |  |  |
| 7895742 | --- | --- | --- | 0.055  | 1.039 | 9.27E-01 | 9.27E+01 |  |  |
| 7895743 | --- | --- | --- | 0.016  | 1.011 | 9.78E-01 | 9.78E+01 |  |  |
| 7895744 | --- | --- | --- | 0.081  | 1.058 | 7.72E-01 | 7.72E+01 |  |  |
| 7895745 | --- | --- | --- | -0.007 | 0.995 | 9.78E-01 | 9.78E+01 |  |  |
| 7895748 | --- | --- | --- | 0.072  | 1.051 | 8.45E-01 | 8.45E+01 |  |  |
| 7895751 | --- | --- | --- | 0.019  | 1.013 | 9.44E-01 | 9.44E+01 |  |  |
| 7895752 | --- | --- | --- | -0.049 | 0.967 | 9.00E-01 | 9.00E+01 |  |  |
| 7895753 | --- | --- | --- | 0.101  | 1.073 | 7.94E-01 | 7.94E+01 |  |  |
| 7895754 | --- | --- | --- | 0.245  | 1.185 | 3.04E-01 | 3.04E+01 |  |  |
| 7895755 | --- | --- | --- | 0.245  | 1.185 | 4.62E-01 | 4.62E+01 |  |  |
| 7895757 | --- | --- | --- | 0.154  | 1.113 | 5.92E-01 | 5.92E+01 |  |  |
| 7895758 | --- | --- | --- | -0.024 | 0.984 | 8.99E-01 | 8.99E+01 |  |  |
| 7895759 | --- | --- | --- | 0.225  | 1.169 | 4.16E-01 | 4.16E+01 |  |  |
| 7895760 | --- | --- | --- | -0.088 | 0.941 | 7.04E-01 | 7.04E+01 |  |  |
| 7895761 | --- | --- | --- | -0.081 | 0.946 | 7.73E-01 | 7.73E+01 |  |  |
| 7895762 | --- | --- | --- | -0.003 | 0.998 | 9.86E-01 | 9.86E+01 |  |  |
| 7895766 | --- | --- | --- | 0.019  | 1.014 | 9.09E-01 | 9.09E+01 |  |  |
| 7895767 | --- | --- | --- | -0.025 | 0.983 | 8.71E-01 | 8.71E+01 |  |  |
| 7895768 | --- | --- | --- | -0.209 | 0.865 | 6.16E-01 | 6.16E+01 |  |  |
| 7895769 | --- | --- | --- | 0.008  | 1.006 | 9.91E-01 | 9.91E+01 |  |  |
| 7895770 | --- | --- | --- | 0.014  | 1.010 | 9.77E-01 | 9.77E+01 |  |  |
| 7895772 | --- | --- | --- | 0.064  | 1.045 | 8.38E-01 | 8.38E+01 |  |  |
| 7895774 | --- | --- | --- | 0.133  | 1.097 | 5.48E-01 | 5.48E+01 |  |  |
| 7895775 | --- | --- | --- | -0.007 | 0.995 | 9.88E-01 | 9.88E+01 |  |  |
| 7895776 | --- | --- | --- | -0.014 | 0.990 | 9.88E-01 | 9.88E+01 |  |  |
| 7895777 | --- | --- | --- | -0.009 | 0.994 | 9.77E-01 | 9.77E+01 |  |  |
| 7895778 | --- | --- | --- | 0.043  | 1.031 | 6.38E-01 | 6.38E+01 |  |  |
| 7895779 | --- | --- | --- | -0.020 | 0.986 | 8.69E-01 | 8.69E+01 |  |  |
| 7895780 | --- | --- | --- | -0.014 | 0.990 | 9.19E-01 | 9.19E+01 |  |  |
| 7895782 | --- | --- | --- | -0.044 | 0.970 | 8.55E-01 | 8.55E+01 |  |  |
| 7895783 | --- | --- | --- | -0.078 | 0.948 | 7.16E-01 | 7.16E+01 |  |  |
| 7895784 | --- | --- | --- | -0.059 | 0.960 | 8.07E-01 | 8.07E+01 |  |  |
| 7895785 | --- | --- | --- | 0.086  | 1.062 | 9.09E-01 | 9.09E+01 |  |  |
| 7895786 | --- | --- | --- | 0.208  | 1.155 | 6.52E-01 | 6.52E+01 |  |  |
| 7895787 | --- | --- | --- | -0.009 | 0.994 | 9.72E-01 | 9.72E+01 |  |  |
| 7895788 | --- | --- | --- | -0.102 | 0.932 | 9.22E-01 | 9.22E+01 |  |  |
| 7895789 | --- | --- | --- | -0.112 | 0.925 | 8.08E-01 | 8.08E+01 |  |  |
| 7895790 | --- | --- | --- | -0.008 | 0.995 | 9.66E-01 | 9.66E+01 |  |  |
| 7895791 | --- | --- | --- | -0.091 | 0.939 | 7.74E-01 | 7.74E+01 |  |  |
| 7895792 | --- | --- | --- | 0.232  | 1.175 | 3.58E-01 | 3.58E+01 |  |  |
| 7895794 | --- | --- | --- | 0.009  | 1.006 | 9.79E-01 | 9.79E+01 |  |  |
| 7895795 | --- | --- | --- | 0.016  | 1.011 | 9.40E-01 | 9.40E+01 |  |  |
| 7895796 | --- | --- | --- | 0.201  | 1.149 | 5.79E-01 | 5.79E+01 |  |  |
| 7895797 | --- | --- | --- | -0.171 | 0.888 | 7.56E-01 | 7.56E+01 |  |  |
| 7895801 | --- | --- | --- | -0.168 | 0.890 | 5.10E-01 | 5.10E+01 |  |  |
| 7895802 | --- | --- | --- | 0.061  | 1.044 | 7.05E-01 | 7.05E+01 |  |  |
| 7895805 | --- | --- | --- | 0.060  | 1.042 | 8.57E-01 | 8.57E+01 |  |  |
| 7895806 | --- | --- | --- | -0.110 | 0.927 | 9.15E-01 | 9.15E+01 |  |  |

|         |     |     |     |        |       |          |          |  |  |
|---------|-----|-----|-----|--------|-------|----------|----------|--|--|
| 7895808 | --- | --- | --- | -0.019 | 0.987 | 9.51E-01 | 9.51E+01 |  |  |
| 7895809 | --- | --- | --- | 0.108  | 1.078 | 7.77E-01 | 7.77E+01 |  |  |
| 7895810 | --- | --- | --- | 0.067  | 1.048 | 8.49E-01 | 8.49E+01 |  |  |
| 7895813 | --- | --- | --- | -0.032 | 0.978 | 9.24E-01 | 9.24E+01 |  |  |
| 7895814 | --- | --- | --- | 0.123  | 1.089 | 8.05E-01 | 8.05E+01 |  |  |
| 7895815 | --- | --- | --- | 0.058  | 1.041 | 6.60E-01 | 6.60E+01 |  |  |
| 7895816 | --- | --- | --- | -0.079 | 0.947 | 8.08E-01 | 8.08E+01 |  |  |
| 7895817 | --- | --- | --- | 0.216  | 1.162 | 3.59E-01 | 3.59E+01 |  |  |
| 7895818 | --- | --- | --- | 0.007  | 1.005 | 9.80E-01 | 9.80E+01 |  |  |
| 7895819 | --- | --- | --- | 0.065  | 1.046 | 4.35E-01 | 4.35E+01 |  |  |
| 7895820 | --- | --- | --- | -0.021 | 0.986 | 9.81E-01 | 9.81E+01 |  |  |
| 7895821 | --- | --- | --- | 0.001  | 1.000 | 1.00E+00 | 1.00E+02 |  |  |
| 7895824 | --- | --- | --- | -0.036 | 0.975 | 7.52E-01 | 7.52E+01 |  |  |
| 7895826 | --- | --- | --- | 0.047  | 1.033 | 6.93E-01 | 6.93E+01 |  |  |
| 7895827 | --- | --- | --- | -0.115 | 0.924 | 5.37E-01 | 5.37E+01 |  |  |
| 7895829 | --- | --- | --- | -0.138 | 0.909 | 7.83E-01 | 7.83E+01 |  |  |
| 7895831 | --- | --- | --- | -0.193 | 0.875 | 4.80E-01 | 4.80E+01 |  |  |
| 7895832 | --- | --- | --- | 0.136  | 1.099 | 7.71E-01 | 7.71E+01 |  |  |
| 7895833 | --- | --- | --- | -0.184 | 0.880 | 8.73E-01 | 8.73E+01 |  |  |
| 7895834 | --- | --- | --- | -0.199 | 0.871 | 7.30E-01 | 7.30E+01 |  |  |
| 7895835 | --- | --- | --- | -0.027 | 0.982 | 9.50E-01 | 9.50E+01 |  |  |
| 7895836 | --- | --- | --- | 0.262  | 1.199 | 3.07E-01 | 3.07E+01 |  |  |
| 7895837 | --- | --- | --- | -0.094 | 0.937 | 7.55E-01 | 7.55E+01 |  |  |
| 7895839 | --- | --- | --- | 0.360  | 1.283 | 5.04E-01 | 5.04E+01 |  |  |
| 7895840 | --- | --- | --- | -0.112 | 0.925 | 7.87E-01 | 7.87E+01 |  |  |
| 7895841 | --- | --- | --- | -0.118 | 0.922 | 5.58E-01 | 5.58E+01 |  |  |
| 7895842 | --- | --- | --- | 0.049  | 1.035 | 8.46E-01 | 8.46E+01 |  |  |
| 7895844 | --- | --- | --- | 0.009  | 1.006 | 9.75E-01 | 9.75E+01 |  |  |
| 7895845 | --- | --- | --- | -0.008 | 0.994 | 9.86E-01 | 9.86E+01 |  |  |
| 7895846 | --- | --- | --- | 0.094  | 1.067 | 7.52E-01 | 7.52E+01 |  |  |
| 7895847 | --- | --- | --- | -0.275 | 0.826 | 2.99E-01 | 2.99E+01 |  |  |
| 7895848 | --- | --- | --- | 0.066  | 1.047 | 8.78E-01 | 8.78E+01 |  |  |
| 7895850 | --- | --- | --- | 0.299  | 1.231 | 6.30E-01 | 6.30E+01 |  |  |
| 7895853 | --- | --- | --- | -0.076 | 0.949 | 8.22E-01 | 8.22E+01 |  |  |
| 7895854 | --- | --- | --- | 0.109  | 1.078 | 5.53E-01 | 5.53E+01 |  |  |
| 7895855 | --- | --- | --- | 0.255  | 1.194 | 4.45E-01 | 4.45E+01 |  |  |
| 7895857 | --- | --- | --- | -0.102 | 0.932 | 6.17E-01 | 6.17E+01 |  |  |
| 7895862 | --- | --- | --- | 0.082  | 1.058 | 7.86E-01 | 7.86E+01 |  |  |
| 7895863 | --- | --- | --- | -0.182 | 0.881 | 7.76E-01 | 7.76E+01 |  |  |
| 7895865 | --- | --- | --- | 0.181  | 1.134 | 6.83E-01 | 6.83E+01 |  |  |
| 7895866 | --- | --- | --- | 0.012  | 1.008 | 9.72E-01 | 9.72E+01 |  |  |
| 7895868 | --- | --- | --- | 0.107  | 1.077 | 6.84E-01 | 6.84E+01 |  |  |
| 7895869 | --- | --- | --- | -0.074 | 0.950 | 6.78E-01 | 6.78E+01 |  |  |
| 7895870 | --- | --- | --- | 0.091  | 1.065 | 9.12E-01 | 9.12E+01 |  |  |
| 7895872 | --- | --- | --- | 0.018  | 1.013 | 9.35E-01 | 9.35E+01 |  |  |
| 7895873 | --- | --- | --- | -0.167 | 0.891 | 3.65E-01 | 3.65E+01 |  |  |
| 7895874 | --- | --- | --- | 0.053  | 1.038 | 9.56E-01 | 9.56E+01 |  |  |
| 7895878 | --- | --- | --- | 0.014  | 1.010 | 9.72E-01 | 9.72E+01 |  |  |
| 7895879 | --- | --- | --- | -0.089 | 0.940 | 7.52E-01 | 7.52E+01 |  |  |
| 7895880 | --- | --- | --- | 0.087  | 1.062 | 5.62E-01 | 5.62E+01 |  |  |
| 7895881 | --- | --- | --- | -0.040 | 0.973 | 9.05E-01 | 9.05E+01 |  |  |
| 7895882 | --- | --- | --- | 0.062  | 1.044 | 7.42E-01 | 7.42E+01 |  |  |
| 7895883 | --- | --- | --- | 0.024  | 1.017 | 9.23E-01 | 9.23E+01 |  |  |
| 7895884 | --- | --- | --- | -0.050 | 0.966 | 9.49E-01 | 9.49E+01 |  |  |
| 7895885 | --- | --- | --- | 0.127  | 1.092 | 4.96E-01 | 4.96E+01 |  |  |
| 7895886 | --- | --- | --- | -0.048 | 0.968 | 8.73E-01 | 8.73E+01 |  |  |
| 7895888 | --- | --- | --- | -0.028 | 0.981 | 9.53E-01 | 9.53E+01 |  |  |
| 7895889 | --- | --- | --- | -0.099 | 0.934 | 6.63E-01 | 6.63E+01 |  |  |
| 7895890 | --- | --- | --- | 0.080  | 1.057 | 7.96E-01 | 7.96E+01 |  |  |
| 7895894 | --- | --- | --- | 0.398  | 1.318 | 6.51E-01 | 6.51E+01 |  |  |
| 7895896 | --- | --- | --- | 0.034  | 1.024 | 9.53E-01 | 9.53E+01 |  |  |
| 7895898 | --- | --- | --- | 0.065  | 1.046 | 8.25E-01 | 8.25E+01 |  |  |
| 7895899 | --- | --- | --- | -0.025 | 0.983 | 8.68E-01 | 8.68E+01 |  |  |
| 7895900 | --- | --- | --- | -0.106 | 0.929 | 8.98E-01 | 8.98E+01 |  |  |
| 7895901 | --- | --- | --- | 0.135  | 1.098 | 4.03E-01 | 4.03E+01 |  |  |
| 7895903 | --- | --- | --- | -0.102 | 0.932 | 8.54E-01 | 8.54E+01 |  |  |
| 7895904 | --- | --- | --- | 0.326  | 1.254 | 4.04E-01 | 4.04E+01 |  |  |
| 7895907 | --- | --- | --- | 0.051  | 1.036 | 6.04E-01 | 6.04E+01 |  |  |
| 7895908 | --- | --- | --- | -0.097 | 0.935 | 7.59E-01 | 7.59E+01 |  |  |
| 7895910 | --- | --- | --- | 0.422  | 1.340 | 7.05E-02 | 7.05E+00 |  |  |
| 7895911 | --- | --- | --- | 0.088  | 1.063 | 5.73E-01 | 5.73E+01 |  |  |
| 7895912 | --- | --- | --- | 0.083  | 1.059 | 4.48E-01 | 4.48E+01 |  |  |
| 7895913 | --- | --- | --- | 0.030  | 1.021 | 9.65E-01 | 9.65E+01 |  |  |
| 7895914 | --- | --- | --- | 0.146  | 1.106 | 7.26E-01 | 7.26E+01 |  |  |
| 7895916 | --- | --- | --- | 0.079  | 1.056 | 7.56E-01 | 7.56E+01 |  |  |
| 7895917 | --- | --- | --- | 0.017  | 1.012 | 9.27E-01 | 9.27E+01 |  |  |
| 7895918 | --- | --- | --- | -0.024 | 0.983 | 9.28E-01 | 9.28E+01 |  |  |

|         |     |     |     |        |       |          |          |  |  |
|---------|-----|-----|-----|--------|-------|----------|----------|--|--|
| 7895919 | --- | --- | --- | 0.017  | 1.012 | 9.63E-01 | 9.63E+01 |  |  |
| 7895920 | --- | --- | --- | 0.015  | 1.011 | 8.84E-01 | 8.84E+01 |  |  |
| 7895921 | --- | --- | --- | 0.236  | 1.178 | 5.38E-01 | 5.38E+01 |  |  |
| 7895923 | --- | --- | --- | -0.059 | 0.960 | 7.27E-01 | 7.27E+01 |  |  |
| 7895924 | --- | --- | --- | 0.016  | 1.011 | 9.36E-01 | 9.36E+01 |  |  |
| 7895925 | --- | --- | --- | 0.148  | 1.108 | 8.74E-01 | 8.74E+01 |  |  |
| 7895926 | --- | --- | --- | -0.002 | 0.998 | 9.90E-01 | 9.90E+01 |  |  |
| 7895927 | --- | --- | --- | 0.159  | 1.117 | 8.03E-01 | 8.03E+01 |  |  |
| 7895928 | --- | --- | --- | -0.038 | 0.974 | 8.84E-01 | 8.84E+01 |  |  |
| 7895929 | --- | --- | --- | 0.071  | 1.051 | 8.74E-01 | 8.74E+01 |  |  |
| 7895930 | --- | --- | --- | 0.032  | 1.022 | 9.36E-01 | 9.36E+01 |  |  |
| 7895931 | --- | --- | --- | 0.029  | 1.020 | 9.66E-01 | 9.66E+01 |  |  |
| 7895932 | --- | --- | --- | -0.091 | 0.939 | 6.34E-01 | 6.34E+01 |  |  |
| 7895933 | --- | --- | --- | 0.337  | 1.263 | 5.47E-01 | 5.47E+01 |  |  |
| 7895934 | --- | --- | --- | 0.098  | 1.070 | 7.44E-01 | 7.44E+01 |  |  |
| 7895936 | --- | --- | --- | 0.042  | 1.029 | 7.56E-01 | 7.56E+01 |  |  |
| 7895937 | --- | --- | --- | 0.017  | 1.012 | 9.57E-01 | 9.57E+01 |  |  |
| 7895938 | --- | --- | --- | 0.050  | 1.035 | 8.05E-01 | 8.05E+01 |  |  |
| 7895939 | --- | --- | --- | 0.085  | 1.061 | 6.37E-01 | 6.37E+01 |  |  |
| 7895941 | --- | --- | --- | 0.182  | 1.135 | 4.04E-01 | 4.04E+01 |  |  |
| 7895942 | --- | --- | --- | 0.071  | 1.051 | 6.01E-01 | 6.01E+01 |  |  |
| 7895943 | --- | --- | --- | -0.053 | 0.964 | 8.84E-01 | 8.84E+01 |  |  |
| 7895944 | --- | --- | --- | -0.044 | 0.970 | 7.52E-01 | 7.52E+01 |  |  |
| 7895945 | --- | --- | --- | 0.056  | 1.040 | 7.56E-01 | 7.56E+01 |  |  |
| 7895946 | --- | --- | --- | 0.016  | 1.011 | 9.78E-01 | 9.78E+01 |  |  |
| 7895947 | --- | --- | --- | 0.022  | 1.015 | 9.11E-01 | 9.11E+01 |  |  |
| 7895948 | --- | --- | --- | -0.088 | 0.941 | 6.19E-01 | 6.19E+01 |  |  |
| 7895952 | --- | --- | --- | -0.008 | 0.995 | 9.77E-01 | 9.77E+01 |  |  |
| 7895953 | --- | --- | --- | -0.080 | 0.946 | 7.53E-01 | 7.53E+01 |  |  |
| 7895954 | --- | --- | --- | -0.136 | 0.910 | 4.06E-01 | 4.06E+01 |  |  |
| 7895955 | --- | --- | --- | -0.136 | 0.910 | 6.42E-01 | 6.42E+01 |  |  |
| 7895956 | --- | --- | --- | -0.016 | 0.989 | 9.48E-01 | 9.48E+01 |  |  |
| 7895957 | --- | --- | --- | 0.071  | 1.050 | 7.96E-01 | 7.96E+01 |  |  |
| 7895959 | --- | --- | --- | 0.062  | 1.044 | 9.01E-01 | 9.01E+01 |  |  |
| 7895960 | --- | --- | --- | 0.079  | 1.057 | 8.77E-01 | 8.77E+01 |  |  |
| 7895961 | --- | --- | --- | 0.123  | 1.089 | 6.04E-01 | 6.04E+01 |  |  |
| 7895962 | --- | --- | --- | -0.185 | 0.880 | 1.72E-01 | 1.72E+01 |  |  |
| 7895963 | --- | --- | --- | 0.051  | 1.036 | 7.16E-01 | 7.16E+01 |  |  |
| 7895964 | --- | --- | --- | 0.015  | 1.011 | 9.56E-01 | 9.56E+01 |  |  |
| 7895965 | --- | --- | --- | 0.144  | 1.105 | 6.76E-01 | 6.76E+01 |  |  |
| 7895966 | --- | --- | --- | -0.102 | 0.932 | 8.33E-01 | 8.33E+01 |  |  |
| 7895967 | --- | --- | --- | 0.520  | 1.434 | 3.79E-01 | 3.79E+01 |  |  |
| 7895969 | --- | --- | --- | 0.030  | 1.021 | 8.98E-01 | 8.98E+01 |  |  |
| 7895971 | --- | --- | --- | 0.117  | 1.084 | 7.89E-01 | 7.89E+01 |  |  |
| 7895972 | --- | --- | --- | -0.012 | 0.992 | 9.70E-01 | 9.70E+01 |  |  |
| 7895973 | --- | --- | --- | -0.065 | 0.956 | 5.56E-01 | 5.56E+01 |  |  |
| 7895974 | --- | --- | --- | 0.032  | 1.023 | 8.69E-01 | 8.69E+01 |  |  |
| 7895976 | --- | --- | --- | -0.017 | 0.988 | 9.81E-01 | 9.81E+01 |  |  |
| 7895979 | --- | --- | --- | 0.183  | 1.135 | 4.27E-01 | 4.27E+01 |  |  |
| 7895981 | --- | --- | --- | 0.057  | 1.040 | 8.78E-01 | 8.78E+01 |  |  |
| 7895982 | --- | --- | --- | 0.094  | 1.067 | 6.85E-01 | 6.85E+01 |  |  |
| 7895983 | --- | --- | --- | -0.055 | 0.963 | 8.81E-01 | 8.81E+01 |  |  |
| 7895985 | --- | --- | --- | 0.119  | 1.086 | 7.03E-01 | 7.03E+01 |  |  |
| 7895987 | --- | --- | --- | 0.046  | 1.033 | 9.25E-01 | 9.25E+01 |  |  |
| 7895988 | --- | --- | --- | 0.002  | 1.001 | 9.96E-01 | 9.96E+01 |  |  |
| 7895990 | --- | --- | --- | -0.051 | 0.965 | 8.78E-01 | 8.78E+01 |  |  |
| 7895992 | --- | --- | --- | 0.068  | 1.048 | 9.19E-01 | 9.19E+01 |  |  |
| 7895993 | --- | --- | --- | 0.006  | 1.004 | 9.86E-01 | 9.86E+01 |  |  |
| 7895994 | --- | --- | --- | 0.000  | 1.000 | 1.00E+00 | 1.00E+02 |  |  |
| 7895995 | --- | --- | --- | -0.048 | 0.967 | 8.46E-01 | 8.46E+01 |  |  |
| 7895996 | --- | --- | --- | 0.092  | 1.066 | 7.13E-01 | 7.13E+01 |  |  |
| 7895997 | --- | --- | --- | -0.102 | 0.932 | 6.09E-01 | 6.09E+01 |  |  |
| 7895998 | --- | --- | --- | -0.084 | 0.944 | 9.25E-01 | 9.25E+01 |  |  |
| 7895999 | --- | --- | --- | -0.158 | 0.896 | 5.27E-01 | 5.27E+01 |  |  |
| 7896000 | --- | --- | --- | -0.085 | 0.943 | 8.76E-01 | 8.76E+01 |  |  |
| 7896001 | --- | --- | --- | -0.007 | 0.995 | 9.90E-01 | 9.90E+01 |  |  |
| 7896004 | --- | --- | --- | -0.107 | 0.928 | 7.00E-01 | 7.00E+01 |  |  |
| 7896005 | --- | --- | --- | -0.030 | 0.980 | 9.21E-01 | 9.21E+01 |  |  |
| 7896006 | --- | --- | --- | 0.048  | 1.034 | 9.49E-01 | 9.49E+01 |  |  |
| 7896007 | --- | --- | --- | 0.005  | 1.003 | 9.86E-01 | 9.86E+01 |  |  |
| 7896008 | --- | --- | --- | 0.167  | 1.123 | 5.53E-01 | 5.53E+01 |  |  |
| 7896009 | --- | --- | --- | -0.102 | 0.932 | 9.22E-01 | 9.22E+01 |  |  |
| 7896010 | --- | --- | --- | 0.062  | 1.044 | 9.01E-01 | 9.01E+01 |  |  |
| 7896011 | --- | --- | --- | -0.452 | 0.731 | 3.71E-01 | 3.71E+01 |  |  |
| 7896014 | --- | --- | --- | -0.069 | 0.953 | 9.14E-01 | 9.14E+01 |  |  |
| 7896017 | --- | --- | --- | 0.106  | 1.076 | 4.49E-01 | 4.49E+01 |  |  |
| 7896018 | --- | --- | --- | 0.133  | 1.096 | 4.66E-01 | 4.66E+01 |  |  |

|         |     |     |     |        |       |          |          |  |  |
|---------|-----|-----|-----|--------|-------|----------|----------|--|--|
| 7896019 | --- | --- | --- | -0.221 | 0.858 | 5.90E-01 | 5.90E+01 |  |  |
| 7896020 | --- | --- | --- | -0.006 | 0.996 | 9.88E-01 | 9.88E+01 |  |  |
| 7896021 | --- | --- | --- | 0.167  | 1.123 | 7.75E-01 | 7.75E+01 |  |  |
| 7896022 | --- | --- | --- | -0.012 | 0.992 | 9.78E-01 | 9.78E+01 |  |  |
| 7896024 | --- | --- | --- | -0.030 | 0.979 | 8.77E-01 | 8.77E+01 |  |  |
| 7896025 | --- | --- | --- | 0.042  | 1.029 | 8.57E-01 | 8.57E+01 |  |  |
| 7896026 | --- | --- | --- | 0.016  | 1.011 | 9.81E-01 | 9.81E+01 |  |  |
| 7896027 | --- | --- | --- | -0.097 | 0.935 | 6.35E-01 | 6.35E+01 |  |  |
| 7896028 | --- | --- | --- | 0.062  | 1.044 | 8.08E-01 | 8.08E+01 |  |  |
| 7896029 | --- | --- | --- | -0.050 | 0.966 | 8.03E-01 | 8.03E+01 |  |  |
| 7896030 | --- | --- | --- | -0.039 | 0.973 | 8.87E-01 | 8.87E+01 |  |  |
| 7896034 | --- | --- | --- | 0.036  | 1.025 | 9.00E-01 | 9.00E+01 |  |  |
| 7896035 | --- | --- | --- | 0.007  | 1.005 | 9.89E-01 | 9.89E+01 |  |  |
| 7896036 | --- | --- | --- | -0.032 | 0.978 | 8.26E-01 | 8.26E+01 |  |  |
| 7896037 | --- | --- | --- | -0.158 | 0.896 | 7.14E-01 | 7.14E+01 |  |  |
| 7896038 | --- | --- | --- | 0.008  | 1.005 | 9.71E-01 | 9.71E+01 |  |  |
| 7896039 | --- | --- | --- | 0.047  | 1.033 | 9.56E-01 | 9.56E+01 |  |  |
| 7896040 | --- | --- | --- | -0.020 | 0.986 | 9.60E-01 | 9.60E+01 |  |  |
| 7896041 | --- | --- | --- | 0.043  | 1.030 | 8.04E-01 | 8.04E+01 |  |  |
| 7896043 | --- | --- | --- | 0.045  | 1.032 | 8.05E-01 | 8.05E+01 |  |  |
| 7896044 | --- | --- | --- | 0.029  | 1.020 | 9.09E-01 | 9.09E+01 |  |  |
| 7896045 | --- | --- | --- | -0.004 | 0.997 | 9.86E-01 | 9.86E+01 |  |  |
| 7896046 | --- | --- | --- | 0.063  | 1.044 | 9.24E-01 | 9.24E+01 |  |  |
| 7896047 | --- | --- | --- | -0.007 | 0.995 | 9.85E-01 | 9.85E+01 |  |  |
| 7896049 | --- | --- | --- | 0.043  | 1.030 | 8.76E-01 | 8.76E+01 |  |  |
| 7896050 | --- | --- | --- | 0.215  | 1.161 | 2.12E-02 | 2.12E+00 |  |  |
| 7896051 | --- | --- | --- | -0.163 | 0.893 | 4.48E-01 | 4.48E+01 |  |  |
| 7896052 | --- | --- | --- | -0.124 | 0.918 | 8.79E-01 | 8.79E+01 |  |  |
| 7896053 | --- | --- | --- | -0.117 | 0.922 | 6.96E-01 | 6.96E+01 |  |  |
| 7896054 | --- | --- | --- | -0.027 | 0.982 | 9.27E-01 | 9.27E+01 |  |  |
| 7896055 | --- | --- | --- | 0.066  | 1.046 | 8.41E-01 | 8.41E+01 |  |  |
| 7896057 | --- | --- | --- | -0.146 | 0.904 | 6.11E-01 | 6.11E+01 |  |  |
| 7896058 | --- | --- | --- | 0.090  | 1.065 | 8.03E-01 | 8.03E+01 |  |  |
| 7896059 | --- | --- | --- | -0.029 | 0.980 | 8.81E-01 | 8.81E+01 |  |  |
| 7896060 | --- | --- | --- | 0.159  | 1.116 | 1.86E-01 | 1.86E+01 |  |  |
| 7896061 | --- | --- | --- | -0.101 | 0.933 | 7.45E-01 | 7.45E+01 |  |  |
| 7896062 | --- | --- | --- | 0.045  | 1.032 | 8.76E-01 | 8.76E+01 |  |  |
| 7896063 | --- | --- | --- | -0.066 | 0.956 | 8.58E-01 | 8.58E+01 |  |  |
| 7896064 | --- | --- | --- | -0.031 | 0.979 | 8.68E-01 | 8.68E+01 |  |  |
| 7896065 | --- | --- | --- | -0.028 | 0.981 | 9.01E-01 | 9.01E+01 |  |  |
| 7896067 | --- | --- | --- | 0.106  | 1.076 | 3.67E-01 | 3.67E+01 |  |  |
| 7896068 | --- | --- | --- | 0.119  | 1.086 | 7.08E-01 | 7.08E+01 |  |  |
| 7896069 | --- | --- | --- | 0.084  | 1.060 | 7.63E-01 | 7.63E+01 |  |  |
| 7896070 | --- | --- | --- | -0.118 | 0.921 | 5.30E-01 | 5.30E+01 |  |  |
| 7896073 | --- | --- | --- | -0.025 | 0.983 | 8.72E-01 | 8.72E+01 |  |  |
| 7896074 | --- | --- | --- | 0.030  | 1.021 | 9.56E-01 | 9.56E+01 |  |  |
| 7896076 | --- | --- | --- | -0.042 | 0.971 | 7.38E-01 | 7.38E+01 |  |  |
| 7896077 | --- | --- | --- | 0.073  | 1.052 | 7.27E-01 | 7.27E+01 |  |  |
| 7896078 | --- | --- | --- | 0.043  | 1.030 | 6.70E-01 | 6.70E+01 |  |  |
| 7896080 | --- | --- | --- | 0.041  | 1.029 | 8.80E-01 | 8.80E+01 |  |  |
| 7896081 | --- | --- | --- | 0.200  | 1.149 | 6.81E-01 | 6.81E+01 |  |  |
| 7896082 | --- | --- | --- | -0.048 | 0.967 | 9.07E-01 | 9.07E+01 |  |  |
| 7896084 | --- | --- | --- | 0.024  | 1.017 | 9.30E-01 | 9.30E+01 |  |  |
| 7896085 | --- | --- | --- | -0.085 | 0.943 | 6.68E-01 | 6.68E+01 |  |  |
| 7896086 | --- | --- | --- | 0.344  | 1.269 | 4.53E-01 | 4.53E+01 |  |  |
| 7896087 | --- | --- | --- | 0.063  | 1.045 | 6.93E-01 | 6.93E+01 |  |  |
| 7896088 | --- | --- | --- | 0.046  | 1.033 | 7.76E-01 | 7.76E+01 |  |  |
| 7896089 | --- | --- | --- | -0.107 | 0.928 | 6.76E-01 | 6.76E+01 |  |  |
| 7896090 | --- | --- | --- | -0.169 | 0.889 | 2.11E-01 | 2.11E+01 |  |  |
| 7896091 | --- | --- | --- | 0.036  | 1.026 | 9.27E-01 | 9.27E+01 |  |  |
| 7896092 | --- | --- | --- | 0.048  | 1.034 | 8.67E-01 | 8.67E+01 |  |  |
| 7896094 | --- | --- | --- | 0.009  | 1.007 | 9.53E-01 | 9.53E+01 |  |  |
| 7896095 | --- | --- | --- | -0.039 | 0.973 | 9.14E-01 | 9.14E+01 |  |  |
| 7896098 | --- | --- | --- | -0.090 | 0.940 | 6.05E-01 | 6.05E+01 |  |  |
| 7896099 | --- | --- | --- | 0.056  | 1.040 | 7.75E-01 | 7.75E+01 |  |  |
| 7896100 | --- | --- | --- | -0.259 | 0.835 | 8.08E-01 | 8.08E+01 |  |  |
| 7896101 | --- | --- | --- | 0.125  | 1.091 | 8.33E-01 | 8.33E+01 |  |  |
| 7896102 | --- | --- | --- | 0.021  | 1.015 | 9.66E-01 | 9.66E+01 |  |  |
| 7896103 | --- | --- | --- | 0.011  | 1.008 | 9.57E-01 | 9.57E+01 |  |  |
| 7896106 | --- | --- | --- | 0.098  | 1.070 | 8.78E-01 | 8.78E+01 |  |  |
| 7896107 | --- | --- | --- | 0.081  | 1.058 | 6.67E-01 | 6.67E+01 |  |  |
| 7896108 | --- | --- | --- | 0.049  | 1.035 | 8.62E-01 | 8.62E+01 |  |  |
| 7896110 | --- | --- | --- | 0.226  | 1.170 | 6.70E-01 | 6.70E+01 |  |  |
| 7896111 | --- | --- | --- | -0.030 | 0.979 | 7.79E-01 | 7.79E+01 |  |  |
| 7896112 | --- | --- | --- | -0.051 | 0.965 | 8.02E-01 | 8.02E+01 |  |  |
| 7896113 | --- | --- | --- | 0.260  | 1.197 | 2.95E-01 | 2.95E+01 |  |  |
| 7896115 | --- | --- | --- | 0.040  | 1.028 | 6.54E-01 | 6.54E+01 |  |  |



|         |     |     |     |        |       |          |          |  |  |
|---------|-----|-----|-----|--------|-------|----------|----------|--|--|
| 7896119 | --- | --- | --- | 0.089  | 1.064 | 8.10E-01 | 8.10E+01 |  |  |
| 7896120 | --- | --- | --- | 0.021  | 1.014 | 9.58E-01 | 9.58E+01 |  |  |
| 7896121 | --- | --- | --- | 0.017  | 1.012 | 9.50E-01 | 9.50E+01 |  |  |
| 7896122 | --- | --- | --- | -0.014 | 0.990 | 9.56E-01 | 9.56E+01 |  |  |
| 7896123 | --- | --- | --- | -0.079 | 0.947 | 7.42E-01 | 7.42E+01 |  |  |
| 7896124 | --- | --- | --- | 0.197  | 1.147 | 1.50E-01 | 1.50E+01 |  |  |
| 7896125 | --- | --- | --- | 0.107  | 1.077 | 8.78E-01 | 8.78E+01 |  |  |
| 7896126 | --- | --- | --- | 0.090  | 1.064 | 7.95E-01 | 7.95E+01 |  |  |
| 7896128 | --- | --- | --- | -0.198 | 0.871 | 3.04E-01 | 3.04E+01 |  |  |
| 7896130 | --- | --- | --- | -0.093 | 0.938 | 4.65E-01 | 4.65E+01 |  |  |
| 7896132 | --- | --- | --- | 0.070  | 1.050 | 5.39E-01 | 5.39E+01 |  |  |
| 7896133 | --- | --- | --- | -0.018 | 0.988 | 9.41E-01 | 9.41E+01 |  |  |
| 7896135 | --- | --- | --- | -0.115 | 0.924 | 7.99E-01 | 7.99E+01 |  |  |
| 7896136 | --- | --- | --- | 0.068  | 1.048 | 6.01E-01 | 6.01E+01 |  |  |
| 7896137 | --- | --- | --- | -0.047 | 0.968 | 7.83E-01 | 7.83E+01 |  |  |
| 7896138 | --- | --- | --- | -0.018 | 0.987 | 9.74E-01 | 9.74E+01 |  |  |
| 7896139 | --- | --- | --- | 0.041  | 1.028 | 9.24E-01 | 9.24E+01 |  |  |
| 7896140 | --- | --- | --- | 0.035  | 1.024 | 9.19E-01 | 9.19E+01 |  |  |
| 7896141 | --- | --- | --- | -0.031 | 0.978 | 9.33E-01 | 9.33E+01 |  |  |
| 7896142 | --- | --- | --- | 0.139  | 1.101 | 7.31E-02 | 7.31E+00 |  |  |
| 7896143 | --- | --- | --- | 0.147  | 1.108 | 5.67E-01 | 5.67E+01 |  |  |
| 7896144 | --- | --- | --- | 0.055  | 1.039 | 6.00E-01 | 6.00E+01 |  |  |
| 7896145 | --- | --- | --- | 0.167  | 1.122 | 4.96E-01 | 4.96E+01 |  |  |
| 7896146 | --- | --- | --- | -0.005 | 0.997 | 9.92E-01 | 9.92E+01 |  |  |
| 7896148 | --- | --- | --- | -0.025 | 0.983 | 8.80E-01 | 8.80E+01 |  |  |
| 7896149 | --- | --- | --- | 0.008  | 1.006 | 9.73E-01 | 9.73E+01 |  |  |
| 7896150 | --- | --- | --- | 0.052  | 1.037 | 7.33E-01 | 7.33E+01 |  |  |
| 7896151 | --- | --- | --- | 0.022  | 1.015 | 8.52E-01 | 8.52E+01 |  |  |
| 7896153 | --- | --- | --- | 0.217  | 1.162 | 3.07E-01 | 3.07E+01 |  |  |
| 7896154 | --- | --- | --- | 0.071  | 1.051 | 8.59E-01 | 8.59E+01 |  |  |
| 7896155 | --- | --- | --- | -0.143 | 0.906 | 8.63E-01 | 8.63E+01 |  |  |
| 7896156 | --- | --- | --- | -0.059 | 0.960 | 8.49E-01 | 8.49E+01 |  |  |
| 7896157 | --- | --- | --- | -0.014 | 0.991 | 9.28E-01 | 9.28E+01 |  |  |
| 7896158 | --- | --- | --- | -0.282 | 0.822 | 7.41E-02 | 7.41E+00 |  |  |
| 7896159 | --- | --- | --- | -0.028 | 0.981 | 8.63E-01 | 8.63E+01 |  |  |
| 7896160 | --- | --- | --- | 0.034  | 1.024 | 9.01E-01 | 9.01E+01 |  |  |
| 7896161 | --- | --- | --- | -0.227 | 0.854 | 7.05E-01 | 7.05E+01 |  |  |
| 7896163 | --- | --- | --- | 0.032  | 1.022 | 9.53E-01 | 9.53E+01 |  |  |
| 7896164 | --- | --- | --- | 0.135  | 1.098 | 5.94E-01 | 5.94E+01 |  |  |
| 7896166 | --- | --- | --- | 0.010  | 1.007 | 9.77E-01 | 9.77E+01 |  |  |
| 7896167 | --- | --- | --- | -0.007 | 0.995 | 9.87E-01 | 9.87E+01 |  |  |
| 7896168 | --- | --- | --- | 0.008  | 1.005 | 9.76E-01 | 9.76E+01 |  |  |
| 7896169 | --- | --- | --- | -0.054 | 0.963 | 7.87E-01 | 7.87E+01 |  |  |
| 7896170 | --- | --- | --- | 0.014  | 1.010 | 9.48E-01 | 9.48E+01 |  |  |
| 7896171 | --- | --- | --- | 0.087  | 1.062 | 8.35E-01 | 8.35E+01 |  |  |
| 7896172 | --- | --- | --- | -0.113 | 0.924 | 4.88E-01 | 4.88E+01 |  |  |
| 7896173 | --- | --- | --- | -0.056 | 0.962 | 7.95E-01 | 7.95E+01 |  |  |
| 7896174 | --- | --- | --- | -0.026 | 0.982 | 9.25E-01 | 9.25E+01 |  |  |
| 7896175 | --- | --- | --- | 0.003  | 1.002 | 9.89E-01 | 9.89E+01 |  |  |
| 7896176 | --- | --- | --- | 0.059  | 1.042 | 6.76E-01 | 6.76E+01 |  |  |
| 7896178 | --- | --- | --- | 0.104  | 1.075 | 4.74E-01 | 4.74E+01 |  |  |
| 7896181 | --- | --- | --- | 0.144  | 1.105 | 6.97E-01 | 6.97E+01 |  |  |
| 7896183 | --- | --- | --- | 0.037  | 1.026 | 7.78E-01 | 7.78E+01 |  |  |
| 7896184 | --- | --- | --- | -0.019 | 0.987 | 9.16E-01 | 9.16E+01 |  |  |
| 7896185 | --- | --- | --- | -0.034 | 0.977 | 9.07E-01 | 9.07E+01 |  |  |
| 7896186 | --- | --- | --- | -0.128 | 0.915 | 4.38E-01 | 4.38E+01 |  |  |
| 7896188 | --- | --- | --- | 0.061  | 1.043 | 9.07E-01 | 9.07E+01 |  |  |
| 7896189 | --- | --- | --- | 0.207  | 1.154 | 5.36E-01 | 5.36E+01 |  |  |
| 7896190 | --- | --- | --- | 0.359  | 1.282 | 4.97E-01 | 4.97E+01 |  |  |
| 7896191 | --- | --- | --- | -0.055 | 0.963 | 8.41E-01 | 8.41E+01 |  |  |
| 7896192 | --- | --- | --- | 0.044  | 1.031 | 7.14E-01 | 7.14E+01 |  |  |
| 7896193 | --- | --- | --- | -0.032 | 0.978 | 9.01E-01 | 9.01E+01 |  |  |
| 7896194 | --- | --- | --- | -0.022 | 0.985 | 9.09E-01 | 9.09E+01 |  |  |
| 7896197 | --- | --- | --- | 0.373  | 1.295 | 3.48E-01 | 3.48E+01 |  |  |
| 7896198 | --- | --- | --- | -0.010 | 0.993 | 9.71E-01 | 9.71E+01 |  |  |
| 7896200 | --- | --- | --- | 0.009  | 1.006 | 9.76E-01 | 9.76E+01 |  |  |
| 7896201 | --- | --- | --- | 0.194  | 1.144 | 1.63E-01 | 1.63E+01 |  |  |
| 7896204 | --- | --- | --- | 0.064  | 1.045 | 5.25E-01 | 5.25E+01 |  |  |
| 7896205 | --- | --- | --- | 0.078  | 1.055 | 8.13E-01 | 8.13E+01 |  |  |
| 7896206 | --- | --- | --- | 0.148  | 1.108 | 6.64E-01 | 6.64E+01 |  |  |
| 7896210 | --- | --- | --- | -0.027 | 0.981 | 8.97E-01 | 8.97E+01 |  |  |
| 7896212 | --- | --- | --- | 0.017  | 1.012 | 9.49E-01 | 9.49E+01 |  |  |
| 7896213 | --- | --- | --- | -0.041 | 0.972 | 8.80E-01 | 8.80E+01 |  |  |
| 7896217 | --- | --- | --- | 0.095  | 1.068 | 9.01E-01 | 9.01E+01 |  |  |
| 7896218 | --- | --- | --- | -0.051 | 0.966 | 8.91E-01 | 8.91E+01 |  |  |
| 7896219 | --- | --- | --- | -0.139 | 0.908 | 8.01E-01 | 8.01E+01 |  |  |
| 7896221 | --- | --- | --- | -0.021 | 0.985 | 9.49E-01 | 9.49E+01 |  |  |

|         |     |     |     |        |       |          |          |  |  |
|---------|-----|-----|-----|--------|-------|----------|----------|--|--|
| 7896222 | --- | --- | --- | -0.038 | 0.974 | 8.54E-01 | 8.54E+01 |  |  |
| 7896223 | --- | --- | --- | 0.116  | 1.084 | 6.55E-01 | 6.55E+01 |  |  |
| 7896225 | --- | --- | --- | 0.053  | 1.037 | 9.18E-01 | 9.18E+01 |  |  |
| 7896227 | --- | --- | --- | 0.025  | 1.017 | 8.45E-01 | 8.45E+01 |  |  |
| 7896228 | --- | --- | --- | -0.088 | 0.941 | 5.80E-01 | 5.80E+01 |  |  |
| 7896230 | --- | --- | --- | -0.173 | 0.887 | 1.65E-01 | 1.65E+01 |  |  |
| 7896231 | --- | --- | --- | 0.059  | 1.042 | 7.72E-01 | 7.72E+01 |  |  |
| 7896232 | --- | --- | --- | -0.108 | 0.928 | 7.91E-01 | 7.91E+01 |  |  |
| 7896235 | --- | --- | --- | 0.041  | 1.029 | 7.95E-01 | 7.95E+01 |  |  |
| 7896236 | --- | --- | --- | -0.039 | 0.973 | 9.33E-01 | 9.33E+01 |  |  |
| 7896239 | --- | --- | --- | -0.057 | 0.961 | 8.85E-01 | 8.85E+01 |  |  |
| 7896240 | --- | --- | --- | -0.058 | 0.960 | 7.05E-01 | 7.05E+01 |  |  |
| 7896241 | --- | --- | --- | 0.111  | 1.080 | 7.50E-01 | 7.50E+01 |  |  |
| 7896243 | --- | --- | --- | 0.037  | 1.026 | 8.13E-01 | 8.13E+01 |  |  |
| 7896244 | --- | --- | --- | 0.432  | 1.349 | 1.20E-01 | 1.20E+01 |  |  |
| 7896245 | --- | --- | --- | 0.086  | 1.061 | 8.25E-01 | 8.25E+01 |  |  |
| 7896246 | --- | --- | --- | 0.197  | 1.146 | 7.12E-01 | 7.12E+01 |  |  |
| 7896247 | --- | --- | --- | 0.047  | 1.033 | 7.53E-01 | 7.53E+01 |  |  |
| 7896249 | --- | --- | --- | 0.032  | 1.023 | 8.96E-01 | 8.96E+01 |  |  |
| 7896250 | --- | --- | --- | -0.002 | 0.999 | 9.95E-01 | 9.95E+01 |  |  |
| 7896251 | --- | --- | --- | 0.334  | 1.261 | 3.56E-01 | 3.56E+01 |  |  |
| 7896252 | --- | --- | --- | 0.058  | 1.041 | 6.16E-01 | 6.16E+01 |  |  |
| 7896253 | --- | --- | --- | -0.013 | 0.991 | 9.63E-01 | 9.63E+01 |  |  |
| 7896254 | --- | --- | --- | 0.096  | 1.069 | 7.95E-01 | 7.95E+01 |  |  |
| 7896255 | --- | --- | --- | -0.053 | 0.964 | 8.80E-01 | 8.80E+01 |  |  |
| 7896256 | --- | --- | --- | -0.036 | 0.975 | 9.16E-01 | 9.16E+01 |  |  |
| 7896257 | --- | --- | --- | -0.281 | 0.823 | 5.08E-01 | 5.08E+01 |  |  |
| 7896258 | --- | --- | --- | -0.150 | 0.901 | 6.45E-01 | 6.45E+01 |  |  |
| 7896259 | --- | --- | --- | 0.017  | 1.012 | 9.70E-01 | 9.70E+01 |  |  |
| 7896261 | --- | --- | --- | 0.051  | 1.036 | 8.71E-01 | 8.71E+01 |  |  |
| 7896262 | --- | --- | --- | 0.096  | 1.069 | 8.38E-01 | 8.38E+01 |  |  |
| 7896263 | --- | --- | --- | -0.024 | 0.984 | 9.53E-01 | 9.53E+01 |  |  |
| 7896266 | --- | --- | --- | 0.017  | 1.012 | 9.30E-01 | 9.30E+01 |  |  |
| 7896268 | --- | --- | --- | -0.083 | 0.944 | 8.70E-01 | 8.70E+01 |  |  |
| 7896269 | --- | --- | --- | 0.203  | 1.151 | 5.15E-01 | 5.15E+01 |  |  |
| 7896270 | --- | --- | --- | 0.139  | 1.101 | 6.35E-01 | 6.35E+01 |  |  |
| 7896271 | --- | --- | --- | 0.303  | 1.234 | 9.54E-02 | 9.54E+00 |  |  |
| 7896274 | --- | --- | --- | -0.184 | 0.880 | 6.81E-01 | 6.81E+01 |  |  |
| 7896275 | --- | --- | --- | 0.181  | 1.134 | 7.92E-01 | 7.92E+01 |  |  |
| 7896276 | --- | --- | --- | -0.064 | 0.957 | 9.23E-01 | 9.23E+01 |  |  |
| 7896277 | --- | --- | --- | -0.005 | 0.997 | 9.87E-01 | 9.87E+01 |  |  |
| 7896278 | --- | --- | --- | 0.101  | 1.073 | 5.69E-01 | 5.69E+01 |  |  |
| 7896279 | --- | --- | --- | 0.184  | 1.136 | 7.17E-01 | 7.17E+01 |  |  |
| 7896280 | --- | --- | --- | -0.087 | 0.941 | 6.81E-01 | 6.81E+01 |  |  |
| 7896281 | --- | --- | --- | -0.047 | 0.968 | 8.78E-01 | 8.78E+01 |  |  |
| 7896282 | --- | --- | --- | 0.031  | 1.022 | 7.95E-01 | 7.95E+01 |  |  |
| 7896283 | --- | --- | --- | -0.091 | 0.939 | 9.49E-01 | 9.49E+01 |  |  |
| 7896285 | --- | --- | --- | 0.198  | 1.147 | 3.89E-01 | 3.89E+01 |  |  |
| 7896286 | --- | --- | --- | -0.164 | 0.893 | 8.84E-01 | 8.84E+01 |  |  |
| 7896287 | --- | --- | --- | 0.042  | 1.029 | 9.16E-01 | 9.16E+01 |  |  |
| 7896288 | --- | --- | --- | 0.267  | 1.203 | 2.16E-01 | 2.16E+01 |  |  |
| 7896289 | --- | --- | --- | 0.305  | 1.235 | 5.36E-01 | 5.36E+01 |  |  |
| 7896290 | --- | --- | --- | 0.051  | 1.036 | 9.00E-01 | 9.00E+01 |  |  |
| 7896291 | --- | --- | --- | 0.056  | 1.039 | 8.96E-01 | 8.96E+01 |  |  |
| 7896292 | --- | --- | --- | -0.028 | 0.981 | 8.98E-01 | 8.98E+01 |  |  |
| 7896293 | --- | --- | --- | 0.093  | 1.067 | 8.04E-01 | 8.04E+01 |  |  |
| 7896294 | --- | --- | --- | -0.011 | 0.992 | 9.88E-01 | 9.88E+01 |  |  |
| 7896295 | --- | --- | --- | 0.026  | 1.018 | 9.71E-01 | 9.71E+01 |  |  |
| 7896297 | --- | --- | --- | -0.219 | 0.859 | 5.88E-01 | 5.88E+01 |  |  |
| 7896298 | --- | --- | --- | -0.005 | 0.997 | 9.89E-01 | 9.89E+01 |  |  |
| 7896300 | --- | --- | --- | 0.002  | 1.001 | 9.94E-01 | 9.94E+01 |  |  |
| 7896301 | --- | --- | --- | 0.022  | 1.015 | 9.27E-01 | 9.27E+01 |  |  |
| 7896302 | --- | --- | --- | 0.040  | 1.028 | 9.26E-01 | 9.26E+01 |  |  |
| 7896308 | --- | --- | --- | 0.071  | 1.050 | 5.89E-01 | 5.89E+01 |  |  |
| 7896309 | --- | --- | --- | 0.059  | 1.042 | 8.62E-01 | 8.62E+01 |  |  |
| 7896310 | --- | --- | --- | 0.110  | 1.079 | 6.29E-01 | 6.29E+01 |  |  |
| 7896311 | --- | --- | --- | -0.187 | 0.878 | 4.68E-01 | 4.68E+01 |  |  |
| 7896312 | --- | --- | --- | 0.119  | 1.086 | 7.68E-01 | 7.68E+01 |  |  |
| 7896314 | --- | --- | --- | 0.212  | 1.158 | 3.56E-01 | 3.56E+01 |  |  |
| 7896318 | --- | --- | --- | 0.210  | 1.156 | 4.25E-01 | 4.25E+01 |  |  |
| 7896319 | --- | --- | --- | -0.085 | 0.943 | 4.50E-01 | 4.50E+01 |  |  |
| 7896320 | --- | --- | --- | 0.138  | 1.100 | 5.80E-01 | 5.80E+01 |  |  |
| 7896321 | --- | --- | --- | 0.152  | 1.111 | 2.72E-01 | 2.72E+01 |  |  |
| 7896323 | --- | --- | --- | 0.016  | 1.011 | 9.77E-01 | 9.77E+01 |  |  |
| 7896324 | --- | --- | --- | 0.139  | 1.101 | 5.62E-01 | 5.62E+01 |  |  |
| 7896325 | --- | --- | --- | 0.052  | 1.037 | 8.49E-01 | 8.49E+01 |  |  |
| 7896328 | --- | --- | --- | 0.358  | 1.282 | 3.95E-01 | 3.95E+01 |  |  |

|         |     |     |     |        |       |          |          |  |  |
|---------|-----|-----|-----|--------|-------|----------|----------|--|--|
| 7896329 | --- | --- | --- | 0.046  | 1.032 | 8.67E-01 | 8.67E+01 |  |  |
| 7896330 | --- | --- | --- | 0.041  | 1.029 | 9.22E-01 | 9.22E+01 |  |  |
| 7896331 | --- | --- | --- | 0.116  | 1.084 | 5.66E-01 | 5.66E+01 |  |  |
| 7896333 | --- | --- | --- | -0.003 | 0.998 | 9.86E-01 | 9.86E+01 |  |  |
| 7896335 | --- | --- | --- | 0.038  | 1.026 | 8.46E-01 | 8.46E+01 |  |  |
| 7896336 | --- | --- | --- | -0.137 | 0.909 | 8.41E-01 | 8.41E+01 |  |  |
| 7896337 | --- | --- | --- | -0.131 | 0.913 | 7.47E-01 | 7.47E+01 |  |  |
| 7896338 | --- | --- | --- | 0.038  | 1.027 | 8.63E-01 | 8.63E+01 |  |  |
| 7896339 | --- | --- | --- | -0.133 | 0.912 | 4.69E-01 | 4.69E+01 |  |  |
| 7896340 | --- | --- | --- | -0.084 | 0.943 | 8.59E-01 | 8.59E+01 |  |  |
| 7896341 | --- | --- | --- | 0.140  | 1.102 | 5.10E-01 | 5.10E+01 |  |  |
| 7896342 | --- | --- | --- | -0.071 | 0.952 | 8.80E-01 | 8.80E+01 |  |  |
| 7896343 | --- | --- | --- | -0.048 | 0.967 | 8.05E-01 | 8.05E+01 |  |  |
| 7896345 | --- | --- | --- | 0.061  | 1.043 | 7.83E-01 | 7.83E+01 |  |  |
| 7896346 | --- | --- | --- | 0.000  | 1.000 | 1.00E+00 | 1.00E+02 |  |  |
| 7896347 | --- | --- | --- | 0.013  | 1.009 | 9.81E-01 | 9.81E+01 |  |  |
| 7896348 | --- | --- | --- | -0.019 | 0.987 | 9.62E-01 | 9.62E+01 |  |  |
| 7896349 | --- | --- | --- | -0.056 | 0.962 | 7.94E-01 | 7.94E+01 |  |  |
| 7896350 | --- | --- | --- | 0.037  | 1.026 | 9.57E-01 | 9.57E+01 |  |  |
| 7896351 | --- | --- | --- | -0.071 | 0.952 | 8.66E-01 | 8.66E+01 |  |  |
| 7896352 | --- | --- | --- | 0.013  | 1.009 | 9.66E-01 | 9.66E+01 |  |  |
| 7896355 | --- | --- | --- | -0.471 | 0.721 | 3.12E-01 | 3.12E+01 |  |  |
| 7896356 | --- | --- | --- | -0.074 | 0.950 | 7.06E-01 | 7.06E+01 |  |  |
| 7896358 | --- | --- | --- | -0.037 | 0.975 | 9.00E-01 | 9.00E+01 |  |  |
| 7896359 | --- | --- | --- | 0.088  | 1.063 | 7.23E-01 | 7.23E+01 |  |  |
| 7896360 | --- | --- | --- | -0.040 | 0.973 | 9.18E-01 | 9.18E+01 |  |  |
| 7896361 | --- | --- | --- | -0.056 | 0.962 | 8.32E-01 | 8.32E+01 |  |  |
| 7896362 | --- | --- | --- | 0.128  | 1.093 | 4.04E-01 | 4.04E+01 |  |  |
| 7896363 | --- | --- | --- | 0.049  | 1.034 | 8.46E-01 | 8.46E+01 |  |  |
| 7896364 | --- | --- | --- | 0.124  | 1.089 | 7.64E-01 | 7.64E+01 |  |  |
| 7896365 | --- | --- | --- | -0.122 | 0.919 | 8.15E-01 | 8.15E+01 |  |  |
| 7896366 | --- | --- | --- | 0.034  | 1.024 | 8.56E-01 | 8.56E+01 |  |  |
| 7896367 | --- | --- | --- | -0.025 | 0.983 | 8.49E-01 | 8.49E+01 |  |  |
| 7896368 | --- | --- | --- | 0.101  | 1.072 | 7.98E-01 | 7.98E+01 |  |  |
| 7896369 | --- | --- | --- | 0.015  | 1.010 | 9.71E-01 | 9.71E+01 |  |  |
| 7896370 | --- | --- | --- | -0.063 | 0.957 | 8.73E-01 | 8.73E+01 |  |  |
| 7896371 | --- | --- | --- | -0.042 | 0.972 | 8.05E-01 | 8.05E+01 |  |  |
| 7896372 | --- | --- | --- | 0.045  | 1.031 | 9.24E-01 | 9.24E+01 |  |  |
| 7896375 | --- | --- | --- | 0.052  | 1.037 | 9.00E-01 | 9.00E+01 |  |  |
| 7896376 | --- | --- | --- | 0.129  | 1.093 | 2.54E-01 | 2.54E+01 |  |  |
| 7896378 | --- | --- | --- | 0.018  | 1.013 | 9.68E-01 | 9.68E+01 |  |  |
| 7896380 | --- | --- | --- | -0.003 | 0.998 | 9.87E-01 | 9.87E+01 |  |  |
| 7896381 | --- | --- | --- | 0.049  | 1.034 | 7.73E-01 | 7.73E+01 |  |  |
| 7896383 | --- | --- | --- | 0.038  | 1.027 | 9.53E-01 | 9.53E+01 |  |  |
| 7896384 | --- | --- | --- | -0.047 | 0.968 | 7.69E-01 | 7.69E+01 |  |  |
| 7896385 | --- | --- | --- | -0.008 | 0.995 | 9.75E-01 | 9.75E+01 |  |  |
| 7896387 | --- | --- | --- | -0.039 | 0.973 | 8.27E-01 | 8.27E+01 |  |  |
| 7896388 | --- | --- | --- | -0.037 | 0.975 | 9.00E-01 | 9.00E+01 |  |  |
| 7896390 | --- | --- | --- | -0.019 | 0.987 | 9.70E-01 | 9.70E+01 |  |  |
| 7896391 | --- | --- | --- | -0.080 | 0.946 | 8.23E-01 | 8.23E+01 |  |  |
| 7896392 | --- | --- | --- | -0.223 | 0.857 | 7.40E-01 | 7.40E+01 |  |  |
| 7896393 | --- | --- | --- | -0.042 | 0.971 | 9.26E-01 | 9.26E+01 |  |  |
| 7896394 | --- | --- | --- | 0.156  | 1.114 | 6.95E-01 | 6.95E+01 |  |  |
| 7896395 | --- | --- | --- | 0.026  | 1.019 | 9.01E-01 | 9.01E+01 |  |  |
| 7896397 | --- | --- | --- | -0.110 | 0.927 | 4.47E-01 | 4.47E+01 |  |  |
| 7896398 | --- | --- | --- | -0.025 | 0.983 | 9.72E-01 | 9.72E+01 |  |  |
| 7896401 | --- | --- | --- | 0.118  | 1.085 | 7.98E-01 | 7.98E+01 |  |  |
| 7896403 | --- | --- | --- | 0.039  | 1.027 | 6.45E-01 | 6.45E+01 |  |  |
| 7896404 | --- | --- | --- | 0.014  | 1.009 | 9.64E-01 | 9.64E+01 |  |  |
| 7896405 | --- | --- | --- | 0.104  | 1.074 | 6.76E-01 | 6.76E+01 |  |  |
| 7896406 | --- | --- | --- | 0.031  | 1.022 | 9.63E-01 | 9.63E+01 |  |  |
| 7896412 | --- | --- | --- | 0.016  | 1.011 | 9.23E-01 | 9.23E+01 |  |  |
| 7896413 | --- | --- | --- | -0.146 | 0.904 | 2.94E-01 | 2.94E+01 |  |  |
| 7896415 | --- | --- | --- | 0.293  | 1.225 | 1.38E-01 | 1.38E+01 |  |  |
| 7896416 | --- | --- | --- | -0.030 | 0.979 | 9.06E-01 | 9.06E+01 |  |  |
| 7896417 | --- | --- | --- | 0.040  | 1.028 | 8.93E-01 | 8.93E+01 |  |  |
| 7896418 | --- | --- | --- | 0.058  | 1.041 | 7.71E-01 | 7.71E+01 |  |  |
| 7896420 | --- | --- | --- | -0.015 | 0.989 | 9.75E-01 | 9.75E+01 |  |  |
| 7896421 | --- | --- | --- | -0.077 | 0.948 | 6.68E-01 | 6.68E+01 |  |  |
| 7896422 | --- | --- | --- | 0.044  | 1.031 | 8.02E-01 | 8.02E+01 |  |  |
| 7896423 | --- | --- | --- | -0.066 | 0.955 | 6.33E-01 | 6.33E+01 |  |  |
| 7896424 | --- | --- | --- | -0.074 | 0.950 | 6.90E-01 | 6.90E+01 |  |  |
| 7896425 | --- | --- | --- | -0.078 | 0.947 | 5.88E-01 | 5.88E+01 |  |  |
| 7896426 | --- | --- | --- | 0.080  | 1.057 | 6.57E-01 | 6.57E+01 |  |  |
| 7896427 | --- | --- | --- | -0.036 | 0.975 | 7.57E-01 | 7.57E+01 |  |  |
| 7896430 | --- | --- | --- | 0.283  | 1.217 | 1.09E-01 | 1.09E+01 |  |  |
| 7896431 | --- | --- | --- | -0.082 | 0.945 | 8.27E-01 | 8.27E+01 |  |  |

|         |     |     |     |        |       |          |          |  |  |
|---------|-----|-----|-----|--------|-------|----------|----------|--|--|
| 7896432 | --- | --- | --- | 0.092  | 1.066 | 6.57E-01 | 6.57E+01 |  |  |
| 7896434 | --- | --- | --- | -0.022 | 0.985 | 9.54E-01 | 9.54E+01 |  |  |
| 7896437 | --- | --- | --- | 0.219  | 1.164 | 3.09E-01 | 3.09E+01 |  |  |
| 7896438 | --- | --- | --- | -0.033 | 0.978 | 8.92E-01 | 8.92E+01 |  |  |
| 7896439 | --- | --- | --- | 0.225  | 1.169 | 3.46E-01 | 3.46E+01 |  |  |
| 7896442 | --- | --- | --- | -0.017 | 0.988 | 9.78E-01 | 9.78E+01 |  |  |
| 7896443 | --- | --- | --- | 0.005  | 1.004 | 9.82E-01 | 9.82E+01 |  |  |
| 7896444 | --- | --- | --- | -0.014 | 0.991 | 9.74E-01 | 9.74E+01 |  |  |
| 7896445 | --- | --- | --- | 0.341  | 1.267 | 3.70E-01 | 3.70E+01 |  |  |
| 7896446 | --- | --- | --- | -0.012 | 0.992 | 9.63E-01 | 9.63E+01 |  |  |
| 7896447 | --- | --- | --- | 0.080  | 1.057 | 8.66E-01 | 8.66E+01 |  |  |
| 7896448 | --- | --- | --- | 0.013  | 1.009 | 9.39E-01 | 9.39E+01 |  |  |
| 7896450 | --- | --- | --- | 0.074  | 1.053 | 7.75E-01 | 7.75E+01 |  |  |
| 7896453 | --- | --- | --- | 0.078  | 1.055 | 8.59E-01 | 8.59E+01 |  |  |
| 7896456 | --- | --- | --- | -0.221 | 0.858 | 1.13E-01 | 1.13E+01 |  |  |
| 7896457 | --- | --- | --- | -0.109 | 0.927 | 8.16E-01 | 8.16E+01 |  |  |
| 7896458 | --- | --- | --- | 0.008  | 1.006 | 9.81E-01 | 9.81E+01 |  |  |
| 7896459 | --- | --- | --- | -0.249 | 0.841 | 6.93E-01 | 6.93E+01 |  |  |
| 7896460 | --- | --- | --- | 0.175  | 1.129 | 7.83E-01 | 7.83E+01 |  |  |
| 7896461 | --- | --- | --- | 0.377  | 1.299 | 3.75E-01 | 3.75E+01 |  |  |
| 7896464 | --- | --- | --- | 0.053  | 1.037 | 5.96E-01 | 5.96E+01 |  |  |
| 7896466 | --- | --- | --- | 0.023  | 1.016 | 9.49E-01 | 9.49E+01 |  |  |
| 7896467 | --- | --- | --- | -0.091 | 0.939 | 6.91E-01 | 6.91E+01 |  |  |
| 7896468 | --- | --- | --- | -0.055 | 0.963 | 8.53E-01 | 8.53E+01 |  |  |
| 7896472 | --- | --- | --- | 0.019  | 1.013 | 9.75E-01 | 9.75E+01 |  |  |
| 7896474 | --- | --- | --- | -0.140 | 0.907 | 5.99E-01 | 5.99E+01 |  |  |
| 7896476 | --- | --- | --- | -0.096 | 0.935 | 6.94E-01 | 6.94E+01 |  |  |
| 7896477 | --- | --- | --- | 0.068  | 1.048 | 8.26E-01 | 8.26E+01 |  |  |
| 7896479 | --- | --- | --- | -0.172 | 0.888 | 2.53E-01 | 2.53E+01 |  |  |
| 7896481 | --- | --- | --- | 0.043  | 1.030 | 7.93E-01 | 7.93E+01 |  |  |
| 7896482 | --- | --- | --- | -0.043 | 0.971 | 8.27E-01 | 8.27E+01 |  |  |
| 7896483 | --- | --- | --- | -0.066 | 0.955 | 5.49E-01 | 5.49E+01 |  |  |
| 7896484 | --- | --- | --- | -0.103 | 0.931 | 6.54E-01 | 6.54E+01 |  |  |
| 7896485 | --- | --- | --- | 0.045  | 1.032 | 6.43E-01 | 6.43E+01 |  |  |
| 7896488 | --- | --- | --- | 0.009  | 1.006 | 9.78E-01 | 9.78E+01 |  |  |
| 7896489 | --- | --- | --- | -0.114 | 0.924 | 7.98E-01 | 7.98E+01 |  |  |
| 7896490 | --- | --- | --- | -0.076 | 0.949 | 7.57E-01 | 7.57E+01 |  |  |
| 7896491 | --- | --- | --- | 0.032  | 1.022 | 8.03E-01 | 8.03E+01 |  |  |
| 7896492 | --- | --- | --- | 0.365  | 1.288 | 2.88E-01 | 2.88E+01 |  |  |
| 7896493 | --- | --- | --- | -0.004 | 0.997 | 9.88E-01 | 9.88E+01 |  |  |
| 7896494 | --- | --- | --- | 0.044  | 1.031 | 7.72E-01 | 7.72E+01 |  |  |
| 7896496 | --- | --- | --- | 0.009  | 1.006 | 9.53E-01 | 9.53E+01 |  |  |
| 7896497 | --- | --- | --- | 0.031  | 1.022 | 8.88E-01 | 8.88E+01 |  |  |
| 7896498 | --- | --- | --- | 0.013  | 1.009 | 9.76E-01 | 9.76E+01 |  |  |
| 7896500 | --- | --- | --- | -0.059 | 0.960 | 8.78E-01 | 8.78E+01 |  |  |
| 7896501 | --- | --- | --- | 0.019  | 1.013 | 9.20E-01 | 9.20E+01 |  |  |
| 7896502 | --- | --- | --- | -0.011 | 0.993 | 9.88E-01 | 9.88E+01 |  |  |
| 7896505 | --- | --- | --- | 0.058  | 1.041 | 9.30E-01 | 9.30E+01 |  |  |
| 7896506 | --- | --- | --- | -0.226 | 0.855 | 2.33E-02 | 2.33E+00 |  |  |
| 7896508 | --- | --- | --- | -0.127 | 0.916 | 2.58E-01 | 2.58E+01 |  |  |
| 7896511 | --- | --- | --- | 0.013  | 1.009 | 9.16E-01 | 9.16E+01 |  |  |
| 7896512 | --- | --- | --- | 0.110  | 1.079 | 5.73E-01 | 5.73E+01 |  |  |
| 7896517 | --- | --- | --- | 0.028  | 1.020 | 8.99E-01 | 8.99E+01 |  |  |
| 7896519 | --- | --- | --- | 0.144  | 1.105 | 6.98E-01 | 6.98E+01 |  |  |
| 7896520 | --- | --- | --- | -0.028 | 0.981 | 9.58E-01 | 9.58E+01 |  |  |
| 7896521 | --- | --- | --- | 0.157  | 1.115 | 5.53E-01 | 5.53E+01 |  |  |
| 7896522 | --- | --- | --- | -0.011 | 0.992 | 9.78E-01 | 9.78E+01 |  |  |
| 7896523 | --- | --- | --- | 0.097  | 1.069 | 9.04E-01 | 9.04E+01 |  |  |
| 7896525 | --- | --- | --- | -0.026 | 0.982 | 9.53E-01 | 9.53E+01 |  |  |
| 7896526 | --- | --- | --- | 0.170  | 1.125 | 8.39E-01 | 8.39E+01 |  |  |
| 7896528 | --- | --- | --- | -0.006 | 0.996 | 9.70E-01 | 9.70E+01 |  |  |
| 7896529 | --- | --- | --- | -0.027 | 0.981 | 9.37E-01 | 9.37E+01 |  |  |
| 7896530 | --- | --- | --- | -0.025 | 0.983 | 9.77E-01 | 9.77E+01 |  |  |
| 7896531 | --- | --- | --- | 0.225  | 1.169 | 2.59E-03 | 2.59E-01 |  |  |
| 7896533 | --- | --- | --- | -0.078 | 0.948 | 7.11E-01 | 7.11E+01 |  |  |
| 7896534 | --- | --- | --- | -0.185 | 0.880 | 5.45E-01 | 5.45E+01 |  |  |
| 7896537 | --- | --- | --- | 0.143  | 1.104 | 7.87E-01 | 7.87E+01 |  |  |
| 7896540 | --- | --- | --- | 0.003  | 1.002 | 9.96E-01 | 9.96E+01 |  |  |
| 7896541 | --- | --- | --- | 0.011  | 1.008 | 9.33E-01 | 9.33E+01 |  |  |
| 7896542 | --- | --- | --- | 0.142  | 1.104 | 2.84E-01 | 2.84E+01 |  |  |
| 7896544 | --- | --- | --- | -0.087 | 0.941 | 7.51E-01 | 7.51E+01 |  |  |
| 7896546 | --- | --- | --- | 0.020  | 1.014 | 9.74E-01 | 9.74E+01 |  |  |
| 7896547 | --- | --- | --- | -0.091 | 0.939 | 7.28E-01 | 7.28E+01 |  |  |
| 7896548 | --- | --- | --- | -0.050 | 0.966 | 9.12E-01 | 9.12E+01 |  |  |
| 7896549 | --- | --- | --- | 0.040  | 1.028 | 5.15E-01 | 5.15E+01 |  |  |
| 7896550 | --- | --- | --- | -0.034 | 0.977 | 9.75E-01 | 9.75E+01 |  |  |
| 7896552 | --- | --- | --- | 0.107  | 1.077 | 7.77E-01 | 7.77E+01 |  |  |

|         |     |     |     |        |       |          |          |  |  |
|---------|-----|-----|-----|--------|-------|----------|----------|--|--|
| 7896553 | --- | --- | --- | 0.318  | 1.246 | 7.99E-02 | 7.99E+00 |  |  |
| 7896554 | --- | --- | --- | 0.012  | 1.008 | 9.48E-01 | 9.48E+01 |  |  |
| 7896559 | --- | --- | --- | -0.208 | 0.866 | 6.54E-01 | 6.54E+01 |  |  |
| 7896561 | --- | --- | --- | 0.115  | 1.083 | 8.21E-01 | 8.21E+01 |  |  |
| 7896562 | --- | --- | --- | -0.059 | 0.960 | 8.41E-01 | 8.41E+01 |  |  |
| 7896563 | --- | --- | --- | 0.064  | 1.045 | 8.34E-01 | 8.34E+01 |  |  |
| 7896565 | --- | --- | --- | -0.094 | 0.937 | 8.04E-01 | 8.04E+01 |  |  |
| 7896566 | --- | --- | --- | -0.015 | 0.989 | 9.85E-01 | 9.85E+01 |  |  |
| 7896567 | --- | --- | --- | -0.002 | 0.998 | 9.98E-01 | 9.98E+01 |  |  |
| 7896569 | --- | --- | --- | 0.219  | 1.164 | 5.91E-01 | 5.91E+01 |  |  |
| 7896570 | --- | --- | --- | 0.284  | 1.217 | 3.92E-01 | 3.92E+01 |  |  |
| 7896572 | --- | --- | --- | -0.054 | 0.963 | 9.16E-01 | 9.16E+01 |  |  |
| 7896574 | --- | --- | --- | 0.121  | 1.088 | 5.10E-01 | 5.10E+01 |  |  |
| 7896575 | --- | --- | --- | 0.091  | 1.065 | 8.50E-01 | 8.50E+01 |  |  |
| 7896576 | --- | --- | --- | 0.218  | 1.163 | 4.52E-01 | 4.52E+01 |  |  |
| 7896578 | --- | --- | --- | 0.141  | 1.103 | 7.47E-01 | 7.47E+01 |  |  |
| 7896580 | --- | --- | --- | -0.195 | 0.874 | 5.89E-01 | 5.89E+01 |  |  |
| 7896582 | --- | --- | --- | -0.031 | 0.979 | 9.02E-01 | 9.02E+01 |  |  |
| 7896584 | --- | --- | --- | 0.024  | 1.017 | 9.51E-01 | 9.51E+01 |  |  |
| 7896585 | --- | --- | --- | -0.087 | 0.941 | 7.78E-01 | 7.78E+01 |  |  |
| 7896586 | --- | --- | --- | -0.013 | 0.991 | 9.66E-01 | 9.66E+01 |  |  |
| 7896588 | --- | --- | --- | -0.138 | 0.909 | 6.71E-01 | 6.71E+01 |  |  |
| 7896589 | --- | --- | --- | 0.054  | 1.038 | 9.33E-01 | 9.33E+01 |  |  |
| 7896592 | --- | --- | --- | -0.004 | 0.997 | 9.86E-01 | 9.86E+01 |  |  |
| 7896594 | --- | --- | --- | -0.035 | 0.976 | 7.27E-01 | 7.27E+01 |  |  |
| 7896596 | --- | --- | --- | 0.060  | 1.042 | 8.97E-01 | 8.97E+01 |  |  |
| 7896597 | --- | --- | --- | -0.096 | 0.936 | 8.50E-01 | 8.50E+01 |  |  |
| 7896598 | --- | --- | --- | -0.152 | 0.900 | 8.32E-01 | 8.32E+01 |  |  |
| 7896599 | --- | --- | --- | -0.171 | 0.888 | 2.26E-01 | 2.26E+01 |  |  |
| 7896600 | --- | --- | --- | 0.014  | 1.010 | 9.78E-01 | 9.78E+01 |  |  |
| 7896601 | --- | --- | --- | -0.065 | 0.956 | 9.00E-01 | 9.00E+01 |  |  |
| 7896602 | --- | --- | --- | -0.055 | 0.963 | 6.99E-01 | 6.99E+01 |  |  |
| 7896603 | --- | --- | --- | -0.012 | 0.992 | 9.30E-01 | 9.30E+01 |  |  |
| 7896604 | --- | --- | --- | 0.083  | 1.059 | 8.47E-01 | 8.47E+01 |  |  |
| 7896605 | --- | --- | --- | 0.179  | 1.132 | 3.95E-01 | 3.95E+01 |  |  |
| 7896606 | --- | --- | --- | -0.026 | 0.982 | 8.63E-01 | 8.63E+01 |  |  |
| 7896608 | --- | --- | --- | 0.096  | 1.069 | 6.20E-01 | 6.20E+01 |  |  |
| 7896609 | --- | --- | --- | 0.046  | 1.033 | 8.26E-01 | 8.26E+01 |  |  |
| 7896611 | --- | --- | --- | 0.130  | 1.094 | 6.66E-01 | 6.66E+01 |  |  |
| 7896612 | --- | --- | --- | -0.044 | 0.970 | 8.31E-01 | 8.31E+01 |  |  |
| 7896613 | --- | --- | --- | -0.259 | 0.836 | 4.47E-01 | 4.47E+01 |  |  |
| 7896614 | --- | --- | --- | -0.233 | 0.851 | 2.44E-01 | 2.44E+01 |  |  |
| 7896615 | --- | --- | --- | 0.161  | 1.118 | 3.80E-01 | 3.80E+01 |  |  |
| 7896616 | --- | --- | --- | -0.012 | 0.992 | 9.56E-01 | 9.56E+01 |  |  |
| 7896618 | --- | --- | --- | 0.006  | 1.004 | 9.87E-01 | 9.87E+01 |  |  |
| 7896619 | --- | --- | --- | -0.097 | 0.935 | 8.13E-01 | 8.13E+01 |  |  |
| 7896620 | --- | --- | --- | 0.020  | 1.014 | 9.03E-01 | 9.03E+01 |  |  |
| 7896621 | --- | --- | --- | -0.018 | 0.988 | 9.57E-01 | 9.57E+01 |  |  |
| 7896622 | --- | --- | --- | 0.032  | 1.022 | 8.54E-01 | 8.54E+01 |  |  |
| 7896623 | --- | --- | --- | -0.093 | 0.937 | 7.07E-01 | 7.07E+01 |  |  |
| 7896624 | --- | --- | --- | -0.021 | 0.985 | 9.16E-01 | 9.16E+01 |  |  |
| 7896627 | --- | --- | --- | -0.020 | 0.986 | 9.64E-01 | 9.64E+01 |  |  |
| 7896628 | --- | --- | --- | -0.067 | 0.955 | 8.71E-01 | 8.71E+01 |  |  |
| 7896629 | --- | --- | --- | 0.106  | 1.076 | 7.91E-01 | 7.91E+01 |  |  |
| 7896630 | --- | --- | --- | 0.025  | 1.018 | 9.61E-01 | 9.61E+01 |  |  |
| 7896631 | --- | --- | --- | 0.009  | 1.006 | 9.44E-01 | 9.44E+01 |  |  |
| 7896632 | --- | --- | --- | -0.010 | 0.993 | 9.76E-01 | 9.76E+01 |  |  |
| 7896633 | --- | --- | --- | -0.247 | 0.843 | 5.91E-01 | 5.91E+01 |  |  |
| 7896634 | --- | --- | --- | 0.093  | 1.067 | 9.18E-01 | 9.18E+01 |  |  |
| 7896637 | --- | --- | --- | -0.063 | 0.957 | 5.77E-01 | 5.77E+01 |  |  |
| 7896639 | --- | --- | --- | 0.047  | 1.033 | 5.15E-01 | 5.15E+01 |  |  |
| 7896640 | --- | --- | --- | -0.063 | 0.957 | 8.42E-01 | 8.42E+01 |  |  |
| 7896642 | --- | --- | --- | -0.007 | 0.995 | 9.77E-01 | 9.77E+01 |  |  |
| 7896643 | --- | --- | --- | 0.096  | 1.069 | 9.04E-01 | 9.04E+01 |  |  |
| 7896644 | --- | --- | --- | 0.000  | 1.000 | 1.00E+00 | 1.00E+02 |  |  |
| 7896646 | --- | --- | --- | 0.216  | 1.162 | 5.73E-01 | 5.73E+01 |  |  |
| 7896647 | --- | --- | --- | -0.031 | 0.979 | 8.25E-01 | 8.25E+01 |  |  |
| 7896648 | --- | --- | --- | 0.002  | 1.001 | 9.97E-01 | 9.97E+01 |  |  |
| 7896650 | --- | --- | --- | 0.359  | 1.283 | 3.92E-01 | 3.92E+01 |  |  |
| 7896651 | --- | --- | --- | 0.159  | 1.116 | 4.34E-01 | 4.34E+01 |  |  |
| 7896652 | --- | --- | --- | -0.078 | 0.947 | 4.96E-01 | 4.96E+01 |  |  |
| 7896653 | --- | --- | --- | 0.040  | 1.028 | 9.24E-01 | 9.24E+01 |  |  |
| 7896654 | --- | --- | --- | 0.129  | 1.093 | 8.48E-01 | 8.48E+01 |  |  |
| 7896655 | --- | --- | --- | 0.093  | 1.067 | 8.66E-01 | 8.66E+01 |  |  |
| 7896656 | --- | --- | --- | 0.114  | 1.082 | 5.43E-01 | 5.43E+01 |  |  |
| 7896657 | --- | --- | --- | 0.176  | 1.130 | 4.47E-01 | 4.47E+01 |  |  |
| 7896659 | --- | --- | --- | -0.037 | 0.975 | 9.56E-01 | 9.56E+01 |  |  |

|         |             |              |                                        |        |       |          |          |  |  |
|---------|-------------|--------------|----------------------------------------|--------|-------|----------|----------|--|--|
| 7896660 | ---         | ---          | ---                                    | 0.060  | 1.042 | 8.66E-01 | 8.66E+01 |  |  |
| 7896661 | ---         | ---          | ---                                    | 0.190  | 1.141 | 4.06E-01 | 4.06E+01 |  |  |
| 7896662 | ---         | ---          | ---                                    | -0.003 | 0.998 | 9.96E-01 | 9.96E+01 |  |  |
| 7896664 | ---         | ---          | ---                                    | 0.057  | 1.041 | 8.31E-01 | 8.31E+01 |  |  |
| 7896668 | ---         | ---          | ---                                    | 0.106  | 1.077 | 8.50E-01 | 8.50E+01 |  |  |
| 7896669 | ---         | ---          | ---                                    | 0.094  | 1.067 | 7.75E-01 | 7.75E+01 |  |  |
| 7896670 | ---         | ---          | ---                                    | 0.037  | 1.026 | 7.72E-01 | 7.72E+01 |  |  |
| 7896671 | ---         | ---          | ---                                    | -0.030 | 0.979 | 9.79E-01 | 9.79E+01 |  |  |
| 7896673 | ---         | ---          | ---                                    | -0.112 | 0.925 | 5.53E-01 | 5.53E+01 |  |  |
| 7896675 | ---         | ---          | ---                                    | -0.030 | 0.979 | 8.74E-01 | 8.74E+01 |  |  |
| 7896676 | ---         | ---          | ---                                    | -0.002 | 0.999 | 9.96E-01 | 9.96E+01 |  |  |
| 7896677 | ---         | ---          | ---                                    | -0.024 | 0.983 | 9.28E-01 | 9.28E+01 |  |  |
| 7896679 | ---         | ---          | ---                                    | 0.020  | 1.014 | 9.09E-01 | 9.09E+01 |  |  |
| 7896681 | ---         | ---          | ---                                    | 0.212  | 1.159 | 1.67E-01 | 1.67E+01 |  |  |
| 7896682 | ---         | ---          | ---                                    | -0.020 | 0.986 | 9.78E-01 | 9.78E+01 |  |  |
| 7896683 | ---         | ---          | ---                                    | -0.082 | 0.945 | 3.76E-01 | 3.76E+01 |  |  |
| 7896684 | ---         | ---          | ---                                    | 0.061  | 1.043 | 7.53E-01 | 7.53E+01 |  |  |
| 7896685 | ---         | ---          | ---                                    | -0.166 | 0.891 | 5.27E-01 | 5.27E+01 |  |  |
| 7896687 | ---         | ---          | ---                                    | 0.061  | 1.043 | 8.30E-01 | 8.30E+01 |  |  |
| 7896688 | ---         | ---          | ---                                    | 0.045  | 1.032 | 8.60E-01 | 8.60E+01 |  |  |
| 7896691 | ---         | ---          | ---                                    | -0.170 | 0.889 | 3.39E-01 | 3.39E+01 |  |  |
| 7896692 | ---         | ---          | ---                                    | -0.033 | 0.978 | 7.32E-01 | 7.32E+01 |  |  |
| 7896693 | ---         | ---          | ---                                    | -0.266 | 0.832 | 1.17E-01 | 1.17E+01 |  |  |
| 7896694 | ---         | ---          | ---                                    | 0.129  | 1.093 | 2.79E-01 | 2.79E+01 |  |  |
| 7896696 | ---         | ---          | ---                                    | -0.041 | 0.972 | 7.14E-01 | 7.14E+01 |  |  |
| 7896698 | ---         | ---          | ---                                    | 0.033  | 1.023 | 8.46E-01 | 8.46E+01 |  |  |
| 7896699 | ---         | ---          | ---                                    | -0.234 | 0.850 | 3.16E-02 | 3.16E+00 |  |  |
| 7896701 | ---         | ---          | ---                                    | 0.028  | 1.020 | 9.49E-01 | 9.49E+01 |  |  |
| 7896702 | ---         | ---          | ---                                    | 0.028  | 1.020 | 9.39E-01 | 9.39E+01 |  |  |
| 7896703 | ---         | ---          | ---                                    | 0.075  | 1.053 | 7.72E-01 | 7.72E+01 |  |  |
| 7896704 | ---         | ---          | ---                                    | 0.226  | 1.170 | 3.70E-01 | 3.70E+01 |  |  |
| 7896708 | ---         | ---          | ---                                    | -0.218 | 0.860 | 2.84E-01 | 2.84E+01 |  |  |
| 7896709 | ---         | ---          | ---                                    | 0.088  | 1.063 | 8.20E-01 | 8.20E+01 |  |  |
| 7896710 | ---         | ---          | ---                                    | -0.140 | 0.908 | 5.30E-01 | 5.30E+01 |  |  |
| 7896711 | ---         | ---          | ---                                    | 0.124  | 1.090 | 8.02E-01 | 8.02E+01 |  |  |
| 7896713 | ---         | ---          | ---                                    | -0.033 | 0.977 | 8.13E-01 | 8.13E+01 |  |  |
| 7896715 | ---         | ---          | ---                                    | 0.403  | 1.322 | 8.93E-02 | 8.93E+00 |  |  |
| 7896716 | ---         | ---          | ---                                    | -0.018 | 0.987 | 9.46E-01 | 9.46E+01 |  |  |
| 7896717 | ---         | ---          | ---                                    | -0.258 | 0.836 | 2.59E-02 | 2.59E+00 |  |  |
| 7896719 | ---         | ---          | ---                                    | 0.058  | 1.041 | 8.91E-01 | 8.91E+01 |  |  |
| 7896720 | ---         | ---          | ---                                    | 0.040  | 1.028 | 9.29E-01 | 9.29E+01 |  |  |
| 7896722 | ---         | ---          | ---                                    | -0.173 | 0.887 | 7.49E-01 | 7.49E+01 |  |  |
| 7896723 | ---         | ---          | ---                                    | 0.029  | 1.021 | 8.36E-01 | 8.36E+01 |  |  |
| 7896724 | ---         | ---          | ---                                    | 0.737  | 1.667 | 5.59E-02 | 5.59E+00 |  |  |
| 7896726 | ---         | ---          | ---                                    | 0.197  | 1.146 | 1.15E-01 | 1.15E+01 |  |  |
| 7896727 | ---         | ---          | ---                                    | 0.431  | 1.348 | 1.33E-01 | 1.33E+01 |  |  |
| 7896728 | ---         | ---          | ---                                    | -0.235 | 0.850 | 7.02E-03 | 7.02E-01 |  |  |
| 7896736 | ---         | ---          | ---                                    | 0.012  | 1.009 | 9.77E-01 | 9.77E+01 |  |  |
| 7896742 | NM_207366   | 40435        | septin 14                              | -0.030 | 0.979 | 9.19E-01 | 9.19E+01 |  |  |
| 7896746 | ---         | ---          | ---                                    | -0.123 | 0.919 | 7.11E-01 | 7.11E+01 |  |  |
| 7896748 | ---         | ---          | ---                                    | 0.318  | 1.247 | 4.42E-01 | 4.42E+01 |  |  |
| 7896752 | ---         | ---          | ---                                    | -0.042 | 0.971 | 8.97E-01 | 8.97E+01 |  |  |
| 7896756 | BC037297    | FAM87A       | family with sequence similarity 87     | -0.086 | 0.942 | 4.88E-01 | 4.88E+01 |  |  |
| 7896759 | AK096570    | LOC643837    | hypothetical LOC643837                 | 0.018  | 1.012 | 9.61E-01 | 9.61E+01 |  |  |
| 7896761 | NM_152486   | SAMD11       | sterile alpha motif domain contain     | -0.044 | 0.970 | 6.91E-01 | 6.91E+01 |  |  |
| 7896779 | NM_198317   | KLHL17       | kelch-like 17 (Drosophila)             | -0.032 | 0.978 | 7.34E-01 | 7.34E+01 |  |  |
| 7896798 | NM_032129   | PLEKHN1      | pleckstrin homology domain contain     | 0.003  | 1.002 | 9.82E-01 | 9.82E+01 |  |  |
| 7896817 | NM_005101   | ISG15        | ISG15 ubiquitin-like modifier          | 0.126  | 1.092 | 6.69E-01 | 6.69E+01 |  |  |
| 7896822 | NM_198576   | AGRN         | agrin                                  | -0.078 | 0.947 | 2.71E-01 | 2.71E+01 |  |  |
| 7896859 | ---         | ---          | ---                                    | -0.039 | 0.973 | 8.29E-01 | 8.29E+01 |  |  |
| 7896865 | NM_153254   | TTL10        | tubulin tyrosine ligase-like family,   | -0.019 | 0.987 | 8.87E-01 | 8.87E+01 |  |  |
| 7896878 | NM_080605   | B3GALT6      | UDP-Gal:betaGal beta 1,3-galactos      | -0.007 | 0.995 | 9.68E-01 | 9.68E+01 |  |  |
| 7896882 | NM_00113041 | SCNN1D       | sodium channel, nonvoltage-gated       | 0.024  | 1.017 | 8.57E-01 | 8.57E+01 |  |  |
| 7896908 | NM_153339   | PUSL1        | pseudouridylylase synthase-like 1      | -0.090 | 0.939 | 2.94E-01 | 2.94E+01 |  |  |
| 7896917 | NM_00102988 | GLTPD1       | glycolipid transfer protein domain     | -0.078 | 0.948 | 4.44E-01 | 4.44E+01 |  |  |
| 7896921 | NM_152228   | TAS1R3       | taste receptor, type 1, member 3       | -0.005 | 0.997 | 9.78E-01 | 9.78E+01 |  |  |
| 7896929 | NM_022834   | VWA1         | von Willebrand factor A domain contain | -0.007 | 0.995 | 9.57E-01 | 9.57E+01 |  |  |
| 7896952 | NM_018188   | ATAD3A       | ATPase family, AAA domain contain      | -0.084 | 0.944 | 3.62E-01 | 3.62E+01 |  |  |
| 7896961 | NM_031921   | ATAD3B       | ATPase family, AAA domain contain      | -0.038 | 0.974 | 7.38E-01 | 7.38E+01 |  |  |
| 7896985 | NM_080875   | MIB2         | mindbomb homolog 2 (Drosophila)        | -0.046 | 0.969 | 6.33E-01 | 6.33E+01 |  |  |
| 7897006 | NM_006983   | MMP23B       | matrix metalloproteinase 23B           | 0.006  | 1.004 | 9.70E-01 | 9.70E+01 |  |  |
| 7897034 | NM_000815   | GABRD        | gamma-aminobutyric acid (GABA)         | 0.079  | 1.056 | 3.66E-01 | 3.66E+01 |  |  |
| 7897044 | NM_002744   | PRKCZ        | protein kinase C, zeta                 | -0.088 | 0.941 | 4.52E-01 | 4.52E+01 |  |  |
| 7897066 | NR_024445   | LOC100128003 | hypothetical protein LOC10012800       | -0.056 | 0.962 | 5.72E-01 | 5.72E+01 |  |  |
| 7897068 | NM_003036   | SKI          | v-ski sarcoma viral oncogene hom       | -0.098 | 0.934 | 1.21E-01 | 1.21E+01 |  |  |
| 7897076 | ---         | ---          | ---                                    | -0.114 | 0.924 | 3.05E-01 | 3.05E+01 |  |  |
| 7897078 | NM_007033   | RER1         | RER1 retention in endoplasmic ret      | 0.005  | 1.004 | 9.82E-01 | 9.82E+01 |  |  |

|         |             |             |                                     |        |       |          |          |  |  |
|---------|-------------|-------------|-------------------------------------|--------|-------|----------|----------|--|--|
| 7897089 | NM_014638   | PLCH2       | phospholipase C, eta 2              | -0.093 | 0.938 | 5.48E-02 | 5.48E+00 |  |  |
| 7897119 | AF425266    | C1orf93     | chromosome 1 open reading frame     | -0.048 | 0.967 | 5.15E-01 | 5.15E+01 |  |  |
| 7897128 | NM_080431   | ACTRT2      | actin-related protein T2            | -0.078 | 0.947 | 4.29E-01 | 4.29E+01 |  |  |
| 7897132 | NM_022114   | PRDM16      | PR domain containing 16             | -0.045 | 0.969 | 6.28E-01 | 6.28E+01 |  |  |
| 7897154 | NM_014448   | ARHGEF16    | Rho guanine exchange factor (GEF)   | -0.032 | 0.978 | 7.87E-01 | 7.87E+01 |  |  |
| 7897172 | NM_182752   | TPRG1L      | tumor protein p63 regulated 1-like  | -0.161 | 0.894 | 2.67E-02 | 2.67E+00 |  |  |
| 7897179 | NM_00112624 | TP73        | tumor protein p73                   | -0.036 | 0.975 | 7.38E-01 | 7.38E+01 |  |  |
| 7897196 | NM_152492   | CCDC27      | coiled-coil domain containing 27    | -0.007 | 0.995 | 9.64E-01 | 9.64E+01 |  |  |
| 7897210 | NM_004402   | DFFB        | DNA fragmentation factor, 40kDa,    | 0.021  | 1.015 | 8.85E-01 | 8.85E+01 |  |  |
| 7897236 | NM_003636   | KCNAB2      | potassium voltage-gated channel,    | 0.023  | 1.016 | 8.84E-01 | 8.84E+01 |  |  |
| 7897257 | NM_207396   | RNF207      | ring finger protein 207             | 0.002  | 1.002 | 9.89E-01 | 9.89E+01 |  |  |
| 7897263 | NM_207396   | RNF207      | ring finger protein 207             | -0.009 | 0.994 | 9.62E-01 | 9.62E+01 |  |  |
| 7897277 | BC030279    | C1orf211    | chromosome 1 open reading frame     | -0.031 | 0.979 | 8.47E-01 | 8.47E+01 |  |  |
| 7897280 | NM_00102459 | HES3        | hairy and enhancer of split 3 (Dros | 0.001  | 1.001 | 9.93E-01 | 9.93E+01 |  |  |
| 7897286 | AY358179    | UNQ6193     | GSQS6193                            | 0.013  | 1.009 | 9.44E-01 | 9.44E+01 |  |  |
| 7897288 | NM_031475   | ESPN        | espin                               | 0.084  | 1.060 | 3.35E-01 | 3.35E+01 |  |  |
| 7897293 | ---         | ---         | ---                                 | 0.049  | 1.035 | 7.37E-01 | 7.37E+01 |  |  |
| 7897295 | NM_138697   | TAS1R1      | taste receptor, type 1, member 1    | -0.014 | 0.990 | 9.51E-01 | 9.51E+01 |  |  |
| 7897305 | NM_005341   | ZBTB48      | zinc finger and BTB domain containi | -0.033 | 0.978 | 7.52E-01 | 7.52E+01 |  |  |
| 7897322 | NM_153812   | PHF13       | PHD finger protein 13               | -0.032 | 0.978 | 7.75E-01 | 7.75E+01 |  |  |
| 7897329 | NM_138350   | THAP3       | THAP domain containing, apoptos     | 0.035  | 1.025 | 8.63E-01 | 8.63E+01 |  |  |
| 7897339 | NM_015215   | CAMTA1      | calmodulin binding transcription a  | -0.025 | 0.983 | 8.63E-01 | 8.63E+01 |  |  |
| 7897370 | NM_004781   | VAMP3       | vesicle-associated membrane prot    | 0.129  | 1.093 | 4.23E-01 | 4.23E+01 |  |  |
| 7897378 | NM_016831   | PER3        | period homolog 3 (Drosophila)       | 0.043  | 1.030 | 7.97E-01 | 7.97E+01 |  |  |
| 7897404 | NM_007262   | PARK7       | Parkinson disease (autosomal rece   | 0.036  | 1.025 | 8.02E-01 | 8.02E+01 |  |  |
| 7897416 | NM_00108039 | SLC45A1     | solute carrier family 45, member 1  | -0.023 | 0.984 | 9.01E-01 | 9.01E+01 |  |  |
| 7897422 | ---         | ---         | ---                                 | -0.031 | 0.979 | 8.54E-01 | 8.54E+01 |  |  |
| 7897424 | ---         | ---         | ---                                 | 0.001  | 1.001 | 9.96E-01 | 9.96E+01 |  |  |
| 7897426 | NM_001215   | CA6         | carbonic anhydrase VI               | 0.019  | 1.013 | 9.56E-01 | 9.56E+01 |  |  |
| 7897439 | ---         | ---         | ---                                 | 0.019  | 1.013 | 9.48E-01 | 9.48E+01 |  |  |
| 7897449 | NM_025106   | SPSB1       | splA/ryanodine receptor domain a    | -0.168 | 0.890 | 1.65E-01 | 1.65E+01 |  |  |
| 7897460 | NM_032315   | SLC25A33    | solute carrier family 25, member 3  | 0.095  | 1.068 | 5.29E-01 | 5.29E+01 |  |  |
| 7897469 | NM_00113092 | TMEM201     | transmembrane protein 201           | -0.029 | 0.980 | 8.09E-01 | 8.09E+01 |  |  |
| 7897482 | NM_005026   | PIK3CD      | phosphoinositide-3-kinase, catalyt  | 0.046  | 1.032 | 6.60E-01 | 6.60E+01 |  |  |
| 7897527 | NM_00110556 | UBE4B       | ubiquitination factor E4B (UFD2 ho  | -0.018 | 0.987 | 9.01E-01 | 9.01E+01 |  |  |
| 7897561 | NM_015074   | KIF1B       | kinesin family member 1B            | 0.163  | 1.120 | 3.18E-01 | 3.18E+01 |  |  |
| 7897620 | NM_002631   | PGD         | phosphogluconate dehydrogenase      | 0.003  | 1.002 | 9.97E-01 | 9.97E+01 |  |  |
| 7897632 | NM_198544   | APITD1      | apoptosis-inducing, TAF9-like dom   | -0.088 | 0.941 | 5.48E-01 | 5.48E+01 |  |  |
| 7897648 | NM_004565   | PEX14       | peroxisomal biogenesis factor 14    | -0.043 | 0.971 | 6.71E-01 | 6.71E+01 |  |  |
| 7897661 | ---         | ---         | ---                                 | 0.030  | 1.021 | 8.39E-01 | 8.39E+01 |  |  |
| 7897663 | NM_007375   | TARDBP      | TAR DNA binding protein             | -0.007 | 0.995 | 9.44E-01 | 9.44E+01 |  |  |
| 7897685 | NM_013319   | UBIAD1      | UbiA prenyltransferase domain co    | 0.015  | 1.010 | 9.27E-01 | 9.27E+01 |  |  |
| 7897691 | NM_020780   | PTCHD2      | patched domain containing 2         | 0.036  | 1.025 | 8.16E-01 | 8.16E+01 |  |  |
| 7897714 | NM_00101476 | FBXO44      | F-box protein 44                    | -0.023 | 0.984 | 8.47E-01 | 8.47E+01 |  |  |
| 7897728 | NM_018438   | FBXO6       | F-box protein 6                     | 0.097  | 1.070 | 3.95E-01 | 3.95E+01 |  |  |
| 7897737 | NM_198545   | C1orf187    | chromosome 1 open reading frame     | -0.028 | 0.981 | 7.70E-01 | 7.70E+01 |  |  |
| 7897745 | NM_020350   | AGTRAP      | angiotensin II receptor-associated  | 0.000  | 1.000 | 1.00E+00 | 1.00E+02 |  |  |
| 7897753 | NM_005957   | MTHFR       | 5,10-methylenetetrahydrofolate r    | -0.036 | 0.976 | 7.71E-01 | 7.71E+01 |  |  |
| 7897774 | NM_001286   | CLCN6       | chloride channel 6                  | 0.060  | 1.043 | 7.45E-01 | 7.45E+01 |  |  |
| 7897803 | NM_000302   | PLOD1       | procollagen-lysine 1, 2-oxoglutar   | 0.131  | 1.095 | 2.65E-01 | 2.65E+01 |  |  |
| 7897824 | NM_014874   | MFN2        | mitofusin 2                         | 0.062  | 1.044 | 5.23E-01 | 5.23E+01 |  |  |
| 7897849 | NM_021933   | MIIP        | migration and invasion inhibitory   | -0.023 | 0.984 | 8.69E-01 | 8.69E+01 |  |  |
| 7897860 | NM_001243   | TNFRSF8     | tumor necrosis factor receptor sup  | -0.049 | 0.966 | 6.44E-01 | 6.44E+01 |  |  |
| 7897877 | NM_001066   | TNFRSF1B    | tumor necrosis factor receptor sup  | -0.274 | 0.827 | 3.47E-02 | 3.47E+00 |  |  |
| 7897890 | NM_015378   | VPS13D      | vacuolar protein sorting 13 homol   | -0.015 | 0.990 | 9.27E-01 | 9.27E+01 |  |  |
| 7897991 | NM_00101227 | PRAMEF7     | PRAME family member 7               | -0.052 | 0.965 | 6.34E-01 | 6.34E+01 |  |  |
| 7897997 | NM_00101369 | PRAMEF3     | PRAME family member 3               | -0.067 | 0.955 | 6.31E-01 | 6.31E+01 |  |  |
| 7898030 | NM_00109985 | PRAMEF20    | PRAME family member 20              | 0.064  | 1.045 | 6.79E-01 | 6.79E+01 |  |  |
| 7898052 | NM_00109985 | PRAMEF20    | PRAME family member 20              | 0.096  | 1.069 | 4.43E-01 | 4.43E+01 |  |  |
| 7898057 | NM_006474   | PDPN        | podoplanin                          | -0.144 | 0.905 | 6.73E-01 | 6.73E+01 |  |  |
| 7898070 | NM_012231   | PRDM2       | PR domain containing 2, with ZNF    | -0.115 | 0.924 | 8.70E-02 | 8.70E+00 |  |  |
| 7898084 | NM_015209   | RP1-21O18.1 | kazrin                              | -0.033 | 0.977 | 8.32E-01 | 8.32E+01 |  |  |
| 7898102 | NM_201628   | RP1-21O18.1 | kazrin                              | -0.030 | 0.980 | 7.96E-01 | 7.96E+01 |  |  |
| 7898112 | ---         | ---         | ---                                 | -0.143 | 0.906 | 2.84E-01 | 2.84E+01 |  |  |
| 7898115 | NM_00113621 | TMEM51      | transmembrane protein 51            | 0.342  | 1.267 | 1.07E-01 | 1.07E+01 |  |  |
| 7898161 | NM_024329   | EFHD2       | EF-hand domain family, member D     | 0.082  | 1.058 | 6.76E-01 | 6.76E+01 |  |  |
| 7898167 | NM_007272   | CTRC        | chymotrypsin C (caldecrin)          | -0.068 | 0.954 | 5.17E-01 | 5.17E+01 |  |  |
| 7898176 | NM_033440   | CELA2A      | chymotrypsin-like elastase family,  | 0.020  | 1.014 | 9.26E-01 | 9.26E+01 |  |  |
| 7898192 | NM_015291   | DNAJC16     | DnaJ (Hsp40) homolog, subfamily     | 0.068  | 1.049 | 6.30E-01 | 6.30E+01 |  |  |
| 7898209 | ---         | ---         | ---                                 | 0.014  | 1.010 | 9.50E-01 | 9.50E+01 |  |  |
| 7898211 | NM_032341   | DDI2        | DDI1, DNA-damage inducible 1, ho    | -0.070 | 0.953 | 6.92E-01 | 6.92E+01 |  |  |
| 7898227 | NM_015164   | PLEKHM2     | pleckstrin homology domain conta    | 0.062  | 1.044 | 7.74E-01 | 7.74E+01 |  |  |
| 7898249 | NM_207348   | SLC25A34    | solute carrier family 25, member 3  | -0.065 | 0.956 | 4.03E-01 | 4.03E+01 |  |  |
| 7898256 | NM_00101364 | TMEM82      | transmembrane protein 82            | -0.059 | 0.960 | 5.59E-01 | 5.59E+01 |  |  |
| 7898276 | ---         | ---         | ---                                 | -0.012 | 0.992 | 9.53E-01 | 9.53E+01 |  |  |
| 7898278 | NM_015001   | SPEN        | spen homolog, transcriptional regi  | -0.027 | 0.982 | 8.45E-01 | 8.45E+01 |  |  |
| 7898296 | BC017946    | C1orf64     | chromosome 1 open reading frame     | 0.003  | 1.002 | 9.87E-01 | 9.87E+01 |  |  |

|         |                                   |              |                                                              |        |       |          |          |  |  |
|---------|-----------------------------------|--------------|--------------------------------------------------------------|--------|-------|----------|----------|--|--|
| 7898300 | NM_004070                         | CLCNKA       | chloride channel Ka                                          | 0.032  | 1.023 | 8.32E-01 | 8.32E+01 |  |  |
| 7898314 | NM_000085                         | CLCNKB       | chloride channel Kb                                          | -0.019 | 0.987 | 8.84E-01 | 8.84E+01 |  |  |
| 7898328 | NM_00111460                       | C1orf144     | chromosome 1 open reading frame                              | 0.074  | 1.052 | 5.67E-01 | 5.67E+01 |  |  |
| 7898337 | NM_018090                         | NECAP2       | NECAP endocytosis associated 2                               | 0.094  | 1.068 | 3.06E-01 | 3.06E+01 |  |  |
| 7898350 | BC126340 // B2147 // LOC100132147 | LOC100132147 | hypothetical LOC100132147                                    | 0.003  | 1.002 | 9.90E-01 | 9.90E+01 |  |  |
| 7898353 | NR_027002                         | LOC388692    | hypothetical LOC388692                                       | -0.117 | 0.922 | 6.53E-01 | 6.53E+01 |  |  |
| 7898371 | ENST0000036944634 // LOC64634     | LOC64634     | similar to UPF0627 protein ENSP0000036944634                 | 0.002  | 1.001 | 9.90E-01 | 9.90E+01 |  |  |
| 7898377 | NM_014675                         | CROCC        | ciliary rootlet coiled-coil, rootletin                       | -0.037 | 0.975 | 8.08E-01 | 8.08E+01 |  |  |
| 7898407 | BC036435                          | LOC100132147 | hypothetical LOC100132147                                    | 0.014  | 1.009 | 9.65E-01 | 9.65E+01 |  |  |
| 7898431 | NM_016233                         | PADI3        | peptidyl arginine deiminase, type 3                          | -0.017 | 0.988 | 9.16E-01 | 9.16E+01 |  |  |
| 7898483 | NM_018125                         | ARHGEF10L    | Rho guanine nucleotide exchange factor 10L                   | 0.012  | 1.009 | 9.32E-01 | 9.32E+01 |  |  |
| 7898521 | NM_032880                         | IGSF21       | immunoglobulin superfamily, member 21                        | -0.021 | 0.985 | 8.97E-01 | 8.97E+01 |  |  |
| 7898533 | NM_152375                         | KLHDC7A      | kelch domain containing 7A                                   | -0.063 | 0.958 | 4.69E-01 | 4.69E+01 |  |  |
| 7898537 | NM_002584                         | PAX7         | paired box 7                                                 | 0.036  | 1.026 | 8.06E-01 | 8.06E+01 |  |  |
| 7898549 | NM_016183                         | MRT04        | mRNA turnover 4 homolog (S. cerevisiae)                      | 0.008  | 1.005 | 9.82E-01 | 9.82E+01 |  |  |
| 7898556 | NM_00104012                       | PQLC2        | PQ loop repeat containing 2                                  | 0.025  | 1.018 | 8.43E-01 | 8.43E+01 |  |  |
| 7898568 | AK096102                          | LOC100130193 | hypothetical protein LOC100130193                            | 0.139  | 1.101 | 2.74E-01 | 2.74E+01 |  |  |
| 7898570 | ---                               | ---          | ---                                                          | -0.177 | 0.885 | 1.80E-01 | 1.80E+01 |  |  |
| 7898574 | NM_00103236                       | C1orf151     | chromosome 1 open reading frame                              | 0.007  | 1.005 | 9.64E-01 | 9.64E+01 |  |  |
| 7898582 | BC072682                          | RPS14P3      | ribosomal protein S14 pseudogene                             | 0.062  | 1.044 | 7.38E-01 | 7.38E+01 |  |  |
| 7898585 | NM_182744                         | NBL1         | neuroblastoma, suppression of tumor growth 1                 | -0.081 | 0.946 | 4.21E-01 | 4.21E+01 |  |  |
| 7898594 | NM_000871                         | HTR6         | 5-hydroxytryptamine (serotonin) receptor 6                   | -0.097 | 0.935 | 3.37E-01 | 3.37E+01 |  |  |
| 7898602 | NM_015207                         | OTUD3        | OTU domain containing 3                                      | -0.029 | 0.980 | 8.78E-01 | 8.78E+01 |  |  |
| 7898607 | ---                               | ---          | ---                                                          | -0.020 | 0.986 | 9.27E-01 | 9.27E+01 |  |  |
| 7898616 | NM_022819                         | PLA2G2F      | phospholipase A2, group IIF                                  | -0.011 | 0.992 | 9.50E-01 | 9.50E+01 |  |  |
| 7898627 | NM_00103950                       | VWASB1       | von Willebrand factor A domain containing 1                  | 0.018  | 1.013 | 9.24E-01 | 9.24E+01 |  |  |
| 7898653 | NM_207334                         | FAM43B       | family with sequence similarity 43B                          | -0.006 | 0.996 | 9.75E-01 | 9.75E+01 |  |  |
| 7898655 | NM_001785                         | CDA          | cytidine deaminase                                           | -0.042 | 0.971 | 6.92E-01 | 6.92E+01 |  |  |
| 7898663 | NM_032409                         | PINK1        | PTEN induced putative kinase 1                               | -0.185 | 0.880 | 3.33E-02 | 3.33E+00 |  |  |
| 7898673 | ---                               | ---          | ---                                                          | 0.038  | 1.027 | 8.76E-01 | 8.76E+01 |  |  |
| 7898677 | NM_004807                         | HS6ST1       | heparan sulfate 6-O-sulfotransferase 1                       | -0.027 | 0.981 | 8.53E-01 | 8.53E+01 |  |  |
| 7898679 | NM_032264                         | NBPF3        | neuroblastoma breakpoint family, member 3                    | -0.030 | 0.980 | 8.52E-01 | 8.52E+01 |  |  |
| 7898707 | NM_00101369                       | LDLRAD2      | low density lipoprotein receptor class B domain containing 2 | 0.021  | 1.015 | 8.78E-01 | 8.78E+01 |  |  |
| 7898713 | NM_007352                         | CELA3B       | chymotrypsin-like elastase family, member 3B                 | -0.028 | 0.981 | 8.25E-01 | 8.25E+01 |  |  |
| 7898723 | ---                               | ---          | ---                                                          | 0.069  | 1.049 | 5.81E-01 | 5.81E+01 |  |  |
| 7898725 | NM_005747                         | CELA3A       | chymotrypsin-like elastase family, member 3A                 | 0.040  | 1.028 | 7.80E-01 | 7.80E+01 |  |  |
| 7898736 | NR_023918                         | HSPC157      | hypothetical LOC29092                                        | 0.029  | 1.020 | 9.18E-01 | 9.18E+01 |  |  |
| 7898739 | NM_044472                         | CDC42        | cell division cycle 42 (GTP binding)                         | 0.109  | 1.078 | 1.31E-01 | 1.31E+01 |  |  |
| 7898750 | NM_00108362                       | ZBTB40       | zinc finger and BTB domain containing 40                     | -0.038 | 0.974 | 7.97E-01 | 7.97E+01 |  |  |
| 7898773 | NM_020526                         | EPHA8        | EPH receptor A8                                              | -0.050 | 0.966 | 5.39E-01 | 5.39E+01 |  |  |
| 7898809 | NM_017449                         | EPHB2        | EPH receptor B2                                              | 0.054  | 1.038 | 7.00E-01 | 7.00E+01 |  |  |
| 7898833 | NM_00100999                       | KDM1         | lysine (K)-specific demethylase 1                            | -0.118 | 0.922 | 2.45E-01 | 2.45E+01 |  |  |
| 7898856 | ---                               | ---          | ---                                                          | 0.034  | 1.024 | 8.54E-01 | 8.54E+01 |  |  |
| 7898869 | ENST00000374                      | MDS2         | myelodysplastic syndrome 2 translocation 1                   | 0.031  | 1.021 | 8.50E-01 | 8.50E+01 |  |  |
| 7898875 | NM_000975                         | RPL11        | ribosomal protein L11                                        | -0.072 | 0.951 | 4.76E-01 | 4.76E+01 |  |  |
| 7898881 | NM_003198                         | TCEB3        | transcription elongation factor B (TIF-IB)                   | -0.010 | 0.993 | 9.77E-01 | 9.77E+01 |  |  |
| 7898894 | NM_020362                         | C1orf128     | chromosome 1 open reading frame                              | 0.081  | 1.058 | 7.16E-01 | 7.16E+01 |  |  |
| 7898902 | NM_007260                         | LYPLA2       | lysophospholipase II                                         | 0.020  | 1.014 | 9.13E-01 | 9.13E+01 |  |  |
| 7898910 | NM_017761                         | PNRC2        | proline-rich nuclear receptor coactivator 2                  | 0.018  | 1.012 | 8.85E-01 | 8.85E+01 |  |  |
| 7898916 | NM_198173                         | GRHL3        | grainyhead-like 3 (Drosophila)                               | -0.019 | 0.987 | 8.90E-01 | 8.90E+01 |  |  |
| 7898939 | NM_020448                         | NIPAL3       | NIPA-like domain containing 3                                | -0.062 | 0.958 | 7.40E-01 | 7.40E+01 |  |  |
| 7898957 | NM_013441                         | RCAN3        | RCAN family member 3                                         | -0.055 | 0.962 | 7.97E-01 | 7.97E+01 |  |  |
| 7898967 | NM_00101098                       | C1orf130     | chromosome 1 open reading frame                              | -0.051 | 0.965 | 6.27E-01 | 6.27E+01 |  |  |
| 7898975 | NM_005839                         | SRRM1        | serine/arginine repetitive matrix 1                          | 0.020  | 1.014 | 8.86E-01 | 8.86E+01 |  |  |
| 7898988 | NM_013943                         | CLIC4        | chloride intracellular channel 4                             | 0.123  | 1.089 | 6.90E-01 | 6.90E+01 |  |  |
| 7898998 | NM_016124                         | RHD          | Rh blood group, D antigen                                    | -0.075 | 0.949 | 8.06E-01 | 8.06E+01 |  |  |
| 7899005 | NM_014313                         | TMEM50A      | transmembrane protein 50A                                    | -0.173 | 0.887 | 1.12E-02 | 1.12E+00 |  |  |
| 7899016 | NM_003002                         | SDHD         | succinate dehydrogenase complex subunit D                    | 0.123  | 1.089 | 3.20E-01 | 3.20E+01 |  |  |
| 7899018 | NM_018202                         | TMEM57       | transmembrane protein 57                                     | -0.003 | 0.998 | 9.91E-01 | 9.91E+01 |  |  |
| 7899023 | NM_015627                         | LDLRAP1      | low density lipoprotein receptor associated protein 1        | -0.014 | 0.991 | 9.64E-01 | 9.64E+01 |  |  |
| 7899029 | NM_020379                         | MAN1C1       | mannosidase, alpha, class 1C, member 1                       | -0.085 | 0.943 | 4.43E-01 | 4.43E+01 |  |  |
| 7899043 | NM_020451                         | SEPN1        | selenoprotein N, 1                                           | 0.058  | 1.041 | 6.16E-01 | 6.16E+01 |  |  |
| 7899057 | NM_019557                         | FAM54B       | family with sequence similarity 54B                          | -0.028 | 0.981 | 8.85E-01 | 8.85E+01 |  |  |
| 7899069 | ---                               | ---          | ---                                                          | 0.029  | 1.020 | 8.46E-01 | 8.46E+01 |  |  |
| 7899071 | ---                               | ---          | ---                                                          | 0.120  | 1.087 | 7.26E-01 | 7.26E+01 |  |  |
| 7899075 | NM_004455                         | EXTL1        | exostoses (multiple)-like 1                                  | -0.047 | 0.968 | 6.66E-01 | 6.66E+01 |  |  |
| 7899087 | NR_026686                         | PDIK1L       | PDLIM1 interacting kinase 1 like                             | 0.118  | 1.086 | 3.90E-01 | 3.90E+01 |  |  |
| 7899093 | NM_024869                         | GRRP1        | glycine/arginine rich protein 1                              | -0.055 | 0.963 | 5.16E-01 | 5.16E+01 |  |  |
| 7899096 | NM_015871                         | ZNF593       | zinc finger protein 593                                      | -0.020 | 0.986 | 9.21E-01 | 9.21E+01 |  |  |
| 7899101 | NM_006314                         | CNKSR1       | connector enhancer of kinase suppressor of tumorigenesis 1   | -0.014 | 0.990 | 9.22E-01 | 9.22E+01 |  |  |
| 7899134 | NM_022778                         | CCDC21       | coiled-coil domain containing 21                             | 0.029  | 1.021 | 8.95E-01 | 8.95E+01 |  |  |
| 7899153 | NM_031286                         | SH3BGR1      | SH3 domain binding glutamic acid rich protein 1              | 0.116  | 1.084 | 3.11E-01 | 3.11E+01 |  |  |
| 7899160 | NM_001803                         | CD52         | CD52 molecule                                                | 0.306  | 1.237 | 2.12E-02 | 2.12E+00 |  |  |
| 7899167 | NM_024674                         | LIN28        | lin-28 homolog (C. elegans)                                  | -0.051 | 0.966 | 6.92E-01 | 6.92E+01 |  |  |
| 7899173 | NM_024887                         | DHDDS        | dehydrodolichyl diphosphate synthase                         | 0.121  | 1.087 | 2.31E-01 | 2.31E+01 |  |  |
| 7899187 | NM_005517                         | HMG2         | high-mobility group nucleosomal domain 2                     | 0.062  | 1.044 | 6.90E-01 | 6.90E+01 |  |  |
| 7899192 | NM_002953                         | RPS6KA1      | ribosomal protein S6 kinase, 90kD                            | 0.062  | 1.044 | 6.14E-01 | 6.14E+01 |  |  |



|         |             |          |                                      |        |       |          |          |  |  |
|---------|-------------|----------|--------------------------------------|--------|-------|----------|----------|--|--|
| 7899220 | NM_006015   | ARID1A   | AT rich interactive domain 1A (SW    | -0.013 | 0.991 | 9.21E-01 | 9.21E+01 |  |  |
| 7899244 | NM_017837   | PIGV     | phosphatidylinositol glycan ancho    | -0.037 | 0.975 | 8.16E-01 | 8.16E+01 |  |  |
| 7899253 | NM_032283   | ZDHC18   | zinc finger, DHHC-type containing    | 0.031  | 1.022 | 8.39E-01 | 8.39E+01 |  |  |
| 7899265 | NM_006142   | SFN      | stratifin                            | -0.040 | 0.972 | 6.84E-01 | 6.84E+01 |  |  |
| 7899273 | NM_006600   | NUDC     | nuclear distribution gene C homol    | -0.093 | 0.938 | 4.44E-01 | 4.44E+01 |  |  |
| 7899284 | NM_00101364 | TRNP1    | TMF1-regulated nuclear protein 1     | -0.087 | 0.941 | 2.78E-01 | 2.78E+01 |  |  |
| 7899287 | ---         | ---      | ---                                  | -0.009 | 0.994 | 9.53E-01 | 9.53E+01 |  |  |
| 7899289 | NM_015023   | WDTC1    | WD and tetratricopeptide repeats     | -0.094 | 0.937 | 5.77E-01 | 5.77E+01 |  |  |
| 7899310 | NM_032125   | TMEM222  | transmembrane protein 222            | -0.040 | 0.973 | 8.50E-01 | 8.50E+01 |  |  |
| 7899323 | NM_032872   | SYTL1    | synaptotagmin-like 1                 | 0.017  | 1.012 | 8.87E-01 | 8.87E+01 |  |  |
| 7899343 | NM_005281   | GPR3     | G protein-coupled receptor 3         | -0.043 | 0.970 | 7.50E-01 | 7.50E+01 |  |  |
| 7899346 | NM_015933   | CCDC72   | coiled-coil domain containing 72     | -0.026 | 0.982 | 8.31E-01 | 8.31E+01 |  |  |
| 7899348 | ---         | ---      | ---                                  | 0.061  | 1.043 | 4.59E-01 | 4.59E+01 |  |  |
| 7899350 | NM_00114391 | FAM76A   | family with sequence similarity 76   | 0.107  | 1.077 | 5.08E-01 | 5.08E+01 |  |  |
| 7899361 | NM_177424   | STX12    | syntaxin 12                          | 0.039  | 1.028 | 8.69E-01 | 8.69E+01 |  |  |
| 7899377 | NM_138558   | PPP1R8   | protein phosphatase 1, regulatory    | -0.008 | 0.995 | 9.77E-01 | 9.77E+01 |  |  |
| 7899394 | NM_00110555 | C1orf38  | chromosome 1 open reading fram       | 0.167  | 1.123 | 5.10E-01 | 5.10E+01 |  |  |
| 7899407 | NM_014474   | SMPDL3B  | sphingomyelin phosphodiesterase      | 0.002  | 1.002 | 9.89E-01 | 9.89E+01 |  |  |
| 7899417 | NM_018053   | XKR8     | XK, Kell blood group complex subu    | -0.076 | 0.949 | 5.41E-01 | 5.41E+01 |  |  |
| 7899422 | NM_014280   | DNAJC8   | DnaJ (Hsp40) homolog, subfamily      | -0.034 | 0.977 | 8.11E-01 | 8.11E+01 |  |  |
| 7899424 | NM_178191   | ATPIF1   | ATPase inhibitory factor 1           | -0.042 | 0.971 | 6.97E-01 | 6.97E+01 |  |  |
| 7899448 | NM_017638   | MED18    | mediator complex subunit 18          | 0.055  | 1.039 | 7.58E-01 | 7.58E+01 |  |  |
| 7899455 | NM_00104818 | PHACTR4  | phosphatase and actin regulator 4    | -0.035 | 0.976 | 8.71E-01 | 8.71E+01 |  |  |
| 7899462 | NM_00104819 | RCC1     | regulator of chromosome condens      | -0.073 | 0.950 | 5.43E-01 | 5.43E+01 |  |  |
| 7899480 | NR_002907   | SNORA73A | small nucleolar RNA, H/ACA box 7     | -0.041 | 0.972 | 9.46E-01 | 9.46E+01 |  |  |
| 7899484 | ---         | ---      | ---                                  | -0.069 | 0.953 | 9.24E-01 | 9.24E+01 |  |  |
| 7899486 | NR_003109   | TRNAU1AP | tRNA selenocysteine 1 associated     | -0.020 | 0.986 | 9.34E-01 | 9.34E+01 |  |  |
| 7899504 | NM_006582   | GMEB1    | glucocorticoid modulatory elemen     | -0.067 | 0.955 | 7.41E-01 | 7.41E+01 |  |  |
| 7899519 | NM_016258   | YTHDF2   | YTH domain family, member 2          | 0.004  | 1.003 | 9.85E-01 | 9.85E+01 |  |  |
| 7899528 | NM_000911   | OPRD1    | opioid receptor, delta 1             | -0.003 | 0.998 | 9.86E-01 | 9.86E+01 |  |  |
| 7899534 | NM_203342   | EPB41    | erythrocyte membrane protein ba      | -0.102 | 0.932 | 4.43E-01 | 4.43E+01 |  |  |
| 7899560 | ---         | ---      | ---                                  | -0.167 | 0.891 | 6.08E-01 | 6.08E+01 |  |  |
| 7899562 | NM_133178   | PTPRU    | protein tyrosine phosphatase, rec    | 0.018  | 1.012 | 9.14E-01 | 9.14E+01 |  |  |
| 7899595 | NM_002379   | MATN1    | matrilin 1, cartilage matrix protein | 0.041  | 1.029 | 7.45E-01 | 7.45E+01 |  |  |
| 7899602 | ---         | ---      | ---                                  | 0.081  | 1.058 | 6.99E-01 | 6.99E+01 |  |  |
| 7899604 | NM_016505   | ZCCHC17  | zinc finger, CCHC domain containi    | -0.073 | 0.950 | 6.42E-01 | 6.42E+01 |  |  |
| 7899615 | NM_178865   | SERINC2  | serine incorporator 2                | -0.017 | 0.988 | 9.09E-01 | 9.09E+01 |  |  |
| 7899627 | NM_022164   | TINAGL1  | tubulointerstitial nephritis antigen | -0.008 | 0.994 | 9.61E-01 | 9.61E+01 |  |  |
| 7899643 | NM_001525   | HCRT1    | hypocretin (orexin) receptor 1       | 0.015  | 1.010 | 9.28E-01 | 9.28E+01 |  |  |
| 7899654 | NM_006559   | KHDRBS1  | KH domain containing, RNA bindin     | 0.023  | 1.016 | 8.69E-01 | 8.69E+01 |  |  |
| 7899675 | NM_018056   | TMEM39B  | transmembrane protein 39B            | -0.050 | 0.966 | 7.52E-01 | 7.52E+01 |  |  |
| 7899688 | NM_012316   | KPNA6    | karyopherin alpha 6 (importin alfa   | -0.029 | 0.980 | 8.96E-01 | 8.96E+01 |  |  |
| 7899703 | NM_175852   | TXLNA    | taxilin alpha                        | 0.067  | 1.048 | 4.66E-01 | 4.66E+01 |  |  |
| 7899719 | NM_024296   | CCDC28B  | coiled-coil domain containing 28B    | 0.024  | 1.017 | 8.92E-01 | 8.92E+01 |  |  |
| 7899727 | NM_00116004 | IQCC     | IQ motif containing C                | -0.032 | 0.978 | 8.35E-01 | 8.35E+01 |  |  |
| 7899737 | NM_003757   | EIF3I    | eukaryotic translation initiation fa | -0.023 | 0.984 | 9.16E-01 | 9.16E+01 |  |  |
| 7899750 | NM_032648   | FAM167B  | family with sequence similarity 16   | -0.031 | 0.979 | 8.18E-01 | 8.18E+01 |  |  |
| 7899753 | NM_005356   | LCK      | lymphocyte-specific protein tyrosi   | -0.056 | 0.962 | 6.74E-01 | 6.74E+01 |  |  |
| 7899774 | NM_004964   | HDAC1    | histone deacetylase 1                | -0.046 | 0.969 | 7.77E-01 | 7.77E+01 |  |  |
| 7899790 | NM_052841   | TSSK3    | testis-specific serine kinase 3      | -0.004 | 0.997 | 9.90E-01 | 9.90E+01 |  |  |
| 7899795 | ---         | ---      | ---                                  | 0.093  | 1.067 | 3.44E-01 | 3.44E+01 |  |  |
| 7899813 | NM_005610   | RBBP4    | retinoblastoma binding protein 4     | 0.113  | 1.081 | 2.82E-01 | 2.82E+01 |  |  |
| 7899821 | NM_020888   | KIAA1522 | KIAA1522                             | 0.019  | 1.013 | 8.67E-01 | 8.67E+01 |  |  |
| 7899829 | NM_022753   | S100BP   | S100P binding protein                | -0.125 | 0.917 | 2.56E-01 | 2.56E+01 |  |  |
| 7899841 | NM_002143   | HPCA     | hippocalcin                          | 0.036  | 1.025 | 8.09E-01 | 8.09E+01 |  |  |
| 7899849 | ---         | ---      | ---                                  | -0.006 | 0.996 | 9.75E-01 | 9.75E+01 |  |  |
| 7899851 | NM_052998   | ADC      | arginine decarboxylase               | -0.006 | 0.996 | 9.77E-01 | 9.77E+01 |  |  |
| 7899870 | NM_152493   | ZNF362   | zinc finger protein 362              | -0.033 | 0.978 | 8.19E-01 | 8.19E+01 |  |  |
| 7899909 | ---         | ---      | ---                                  | -0.119 | 0.921 | 6.33E-01 | 6.33E+01 |  |  |
| 7899927 | NM_153212   | GJB4     | gap junction protein, beta 4, 30.3k  | 0.049  | 1.035 | 7.45E-01 | 7.45E+01 |  |  |
| 7899939 | NM_002060   | GJA4     | gap junction protein, alpha 4, 37k   | -0.031 | 0.979 | 8.13E-01 | 8.13E+01 |  |  |
| 7899955 | ---         | ---      | ---                                  | -0.108 | 0.928 | 4.56E-01 | 4.56E+01 |  |  |
| 7899957 | NM_005095   | ZMYM4    | zinc finger, MYM-type 4              | 0.010  | 1.007 | 9.53E-01 | 9.53E+01 |  |  |
| 7899990 | NM_014284   | NCDN     | neurochondrin                        | -0.030 | 0.979 | 8.21E-01 | 8.21E+01 |  |  |
| 7900001 | NM_178548   | TFAP2E   | transcription factor AP-2 epsilon (  | -0.062 | 0.958 | 3.90E-01 | 3.90E+01 |  |  |
| 7900009 | NM_017629   | EIF2C4   | eukaryotic translation initiation fa | 0.035  | 1.024 | 8.85E-01 | 8.85E+01 |  |  |
| 7900030 | NM_012199   | EIF2C1   | eukaryotic translation initiation fa | 0.047  | 1.033 | 7.48E-01 | 7.48E+01 |  |  |
| 7900051 | NM_024852   | EIF2C3   | eukaryotic translation initiation fa | -0.026 | 0.982 | 8.93E-01 | 8.93E+01 |  |  |
| 7900076 | NM_014466   | TEKT2    | tektin 2 (testicular)                | -0.045 | 0.970 | 8.33E-01 | 8.33E+01 |  |  |
| 7900087 | NM_017825   | ADPRHL2  | ADP-ribosylhydrolase like 2          | -0.018 | 0.988 | 9.02E-01 | 9.02E+01 |  |  |
| 7900095 | NM_018067   | MAP7D1   | MAP7 domain containing 1             | -0.053 | 0.964 | 4.65E-01 | 4.65E+01 |  |  |
| 7900119 | NM_005119   | THRAP3   | thyroid hormone receptor associa     | -0.005 | 0.997 | 9.81E-01 | 9.81E+01 |  |  |
| 7900129 | NM_024676   | C1orf113 | chromosome 1 open reading fram       | -0.004 | 0.997 | 9.84E-01 | 9.84E+01 |  |  |
| 7900146 | NM_025079   | ZC3H12A  | zinc finger CCCH-type containing 1   | -0.164 | 0.893 | 3.35E-02 | 3.35E+00 |  |  |
| 7900157 | NM_001030   | RPS27    | ribosomal protein S27                | -0.031 | 0.979 | 8.55E-01 | 8.55E+01 |  |  |
| 7900167 | NM_018101   | CDC48    | cell division cycle associated 8     | 0.075  | 1.053 | 5.68E-01 | 5.68E+01 |  |  |
| 7900183 | NM_00103174 | MANEAL   | mannosidase, endo-alpha-like         | -0.110 | 0.926 | 2.73E-01 | 2.73E+01 |  |  |

|         |              |          |                                                   |        |       |          |          |  |  |
|---------|--------------|----------|---------------------------------------------------|--------|-------|----------|----------|--|--|
| 7900192 | NM_198446    | C1orf122 | chromosome 1 open reading frame                   | -0.028 | 0.980 | 8.62E-01 | 8.62E+01 |  |  |
| 7900216 | NM_024595    | AKIRIN1  | akirin 1                                          | -0.048 | 0.967 | 5.99E-01 | 5.99E+01 |  |  |
| 7900228 | NM_004552    | NDUF55   | NADH dehydrogenase (ubiquinone)                   | -0.077 | 0.948 | 4.43E-01 | 4.43E+01 |  |  |
| 7900235 | NM_012090    | MACF1    | microtubule-actin crosslinking factor             | 0.130  | 1.094 | 2.04E-01 | 2.04E+01 |  |  |
| 7900336 | ---          | ---      | ---                                               | 0.269  | 1.205 | 1.78E-01 | 1.78E+01 |  |  |
| 7900340 | NM_181809    | BMP8A    | bone morphogenetic protein 8a                     | -0.018 | 0.988 | 9.51E-01 | 9.51E+01 |  |  |
| 7900352 | NM_022120    | OXCT2    | 3-oxoacid CoA transferase 2                       | -0.036 | 0.975 | 7.09E-01 | 7.09E+01 |  |  |
| 7900354 | NM_006112    | PPIE     | peptidylprolyl isomerase E (cyclophilin)          | -0.056 | 0.962 | 7.82E-01 | 7.82E+01 |  |  |
| 7900365 | NM_00113649  | MFS2     | major facilitator superfamily domain              | -0.067 | 0.955 | 5.04E-01 | 5.04E+01 |  |  |
| 7900382 | NM_006367    | CAP1     | CAP, adenylate cyclase-associated                 | 0.027  | 1.019 | 8.85E-01 | 8.85E+01 |  |  |
| 7900395 | NM_012421    | RLF      | rearranged L-myc fusion                           | -0.054 | 0.963 | 7.87E-01 | 7.87E+01 |  |  |
| 7900413 | NM_005857    | ZMPSTE24 | zinc metalloproteinase (STE24 homologue)          | 0.186  | 1.138 | 1.73E-01 | 1.73E+01 |  |  |
| 7900426 | NM_022733    | SMAP2    | small ArfGAP2                                     | 0.114  | 1.082 | 1.89E-01 | 1.89E+01 |  |  |
| 7900438 | NM_023070    | ZNF643   | zinc finger protein 643                           | -0.302 | 0.811 | 2.89E-02 | 2.89E+00 |  |  |
| 7900446 | NM_198494    | ZNF642   | zinc finger protein 642                           | 0.053  | 1.037 | 7.92E-01 | 7.92E+01 |  |  |
| 7900454 | NM_022774    | DEM1     | defects in morphology 1 homolog                   | -0.029 | 0.980 | 9.26E-01 | 9.26E+01 |  |  |
| 7900468 | NM_00114258  | NFYC     | nuclear transcription factor Y, gamma             | 0.020  | 1.014 | 9.00E-01 | 9.00E+01 |  |  |
| 7900510 | NM_001905    | CTPS     | CTP synthase                                      | -0.047 | 0.968 | 8.24E-01 | 8.24E+01 |  |  |
| 7900531 | NM_007102    | GUCA2B   | guanylate cyclase activator 2B (uracil)           | 0.002  | 1.001 | 9.91E-01 | 9.91E+01 |  |  |
| 7900538 | ---          | ---      | ---                                               | -0.005 | 0.996 | 9.77E-01 | 9.77E+01 |  |  |
| 7900540 | NM_173642    | RIMKLA   | ribosomal modification protein rimK               | -0.077 | 0.948 | 4.94E-01 | 4.94E+01 |  |  |
| 7900546 | NM_024664    | PPCS     | phosphopantotheneoylcysteine synthase             | 0.048  | 1.034 | 6.70E-01 | 6.70E+01 |  |  |
| 7900576 | NM_006347    | PPIH     | peptidylprolyl isomerase H (cyclophilin)          | -0.074 | 0.950 | 6.80E-01 | 6.80E+01 |  |  |
| 7900585 | NM_004559    | YBX1     | Y box binding protein 1                           | 0.047  | 1.033 | 4.49E-01 | 4.49E+01 |  |  |
| 7900597 | BC001508     | C1orf50  | chromosome 1 open reading frame                   | -0.073 | 0.951 | 7.60E-01 | 7.60E+01 |  |  |
| 7900603 | AK299874     | C1orf50  | chromosome 1 open reading frame                   | -0.037 | 0.974 | 7.97E-01 | 7.97E+01 |  |  |
| 7900609 | NM_00101792  | ERMAP    | erythroblast membrane-associated protein          | 0.003  | 1.002 | 9.88E-01 | 9.88E+01 |  |  |
| 7900624 | NM_015911    | ZNF691   | zinc finger protein 691                           | -0.106 | 0.929 | 3.38E-01 | 3.38E+01 |  |  |
| 7900654 | NM_144626    | TMEM125  | transmembrane protein 125                         | -0.018 | 0.987 | 9.01E-01 | 9.01E+01 |  |  |
| 7900683 | NM_005373    | MPL      | myeloproliferative leukemia virus                 | 0.038  | 1.027 | 7.02E-01 | 7.02E+01 |  |  |
| 7900699 | NM_001255    | CDC20    | cell division cycle 20 homolog (S. cerevisiae)    | 0.053  | 1.038 | 7.45E-01 | 7.45E+01 |  |  |
| 7900710 | NM_00101296  | C1orf84  | chromosome 1 open reading frame                   | 0.041  | 1.028 | 4.96E-01 | 4.96E+01 |  |  |
| 7900792 | NM_002840    | PTPRF    | protein tyrosine phosphatase, receptor type       | -0.013 | 0.991 | 9.05E-01 | 9.05E+01 |  |  |
| 7900833 | NM_014663    | KDM4A    | lysine (K)-specific demethylase 4A                | 0.004  | 1.002 | 9.88E-01 | 9.88E+01 |  |  |
| 7900857 | NM_174963    | ST3GAL3  | ST3 beta-galactoside alpha-2,3-sialyltransferase  | -0.010 | 0.993 | 9.57E-01 | 9.57E+01 |  |  |
| 7900878 | NM_057091    | ARTN     | artemin                                           | 0.004  | 1.003 | 9.81E-01 | 9.81E+01 |  |  |
| 7900888 | NM_014652    | IPO13    | importin 13                                       | 0.011  | 1.008 | 9.57E-01 | 9.57E+01 |  |  |
| 7900922 | NM_004047    | ATP6V0B  | ATPase, H+ transporting, lysosomal                | 0.171  | 1.126 | 4.25E-01 | 4.25E+01 |  |  |
| 7900931 | NM_003780    | B4GALT2  | UDP-Gal:betaGlcNAc beta 1,4-galactose 4-epimerase | -0.075 | 0.949 | 3.68E-01 | 3.68E+01 |  |  |
| 7900944 | NM_152499    | CCDC24   | coiled-coil domain containing 24                  | -0.090 | 0.940 | 3.04E-01 | 3.04E+01 |  |  |
| 7900957 | NM_173484    | KLF17    | Kruppel-like factor 17                            | 0.003  | 1.002 | 9.89E-01 | 9.89E+01 |  |  |
| 7900962 | NM_019100    | DMAP1    | DNA methyltransferase 1 associated                | -0.024 | 0.984 | 8.64E-01 | 8.64E+01 |  |  |
| 7900979 | NM_018150    | RNF220   | ring finger protein 220                           | -0.022 | 0.985 | 8.73E-01 | 8.73E+01 |  |  |
| 7900999 | NM_00114563  | C1orf228 | chromosome 1 open reading frame                   | 0.030  | 1.021 | 8.19E-01 | 8.19E+01 |  |  |
| 7901038 | NM_001012    | RPS8     | ribosomal protein S8                              | 0.022  | 1.015 | 9.07E-01 | 9.07E+01 |  |  |
| 7901046 | NR_000015    | SNORD55  | small nucleolar RNA, C/D box 55                   | 0.073  | 1.052 | 6.82E-01 | 6.82E+01 |  |  |
| 7901048 | NR_000024    | SNORD46  | small nucleolar RNA, C/D box 46                   | 0.131  | 1.095 | 6.47E-01 | 6.47E+01 |  |  |
| 7901050 | NR_001456    | SNORD38A | small nucleolar RNA, C/D box 38A                  | -0.080 | 0.946 | 7.93E-01 | 7.93E+01 |  |  |
| 7901052 | NR_001457    | SNORD38B | small nucleolar RNA, C/D box 38B                  | 0.050  | 1.036 | 9.13E-01 | 9.13E+01 |  |  |
| 7901054 | NM_004073    | PLK3     | polo-like kinase 3 (Drosophila)                   | -0.152 | 0.900 | 1.04E-01 | 1.04E+01 |  |  |
| 7901073 | NM_000374    | UROD     | uroporphyrinogen decarboxylase                    | -0.026 | 0.982 | 9.03E-01 | 9.03E+01 |  |  |
| 7901091 | NM_025077    | TOE1     | target of EGFR1, member 1 (nucleolar)             | -0.057 | 0.961 | 6.94E-01 | 6.94E+01 |  |  |
| 7901102 | NM_015506    | MMACHC   | methylmalonic aciduria (cobalamin)                | 0.057  | 1.040 | 6.73E-01 | 6.73E+01 |  |  |
| 7901123 | NM_172164    | NASP     | nuclear autoantigenic sperm protein               | -0.014 | 0.991 | 9.53E-01 | 9.53E+01 |  |  |
| 7901135 | NM_016486    | TMEM69   | transmembrane protein 69                          | 0.049  | 1.035 | 8.05E-01 | 8.05E+01 |  |  |
| 7901140 | NM_015112    | MAST2    | microtubule associated serine/threonine kinase    | 0.012  | 1.008 | 9.43E-01 | 9.43E+01 |  |  |
| 7901187 | NM_00101361  | C1orf190 | chromosome 1 open reading frame                   | 0.026  | 1.018 | 8.64E-01 | 8.64E+01 |  |  |
| 7901212 | ENST00000311 | UQCRH    | ubiquinol-cytochrome c reductase                  | -0.071 | 0.952 | 7.44E-01 | 7.44E+01 |  |  |
| 7901219 | NM_199044    | NSUN4    | NOL1/NOP2/Sun domain family, member 4             | 0.120  | 1.086 | 2.79E-01 | 2.79E+01 |  |  |
| 7901227 | ---          | ---      | ---                                               | 0.066  | 1.047 | 8.63E-01 | 8.63E+01 |  |  |
| 7901229 | NM_001441    | FAAH     | fatty acid amide hydrolase                        | -0.043 | 0.971 | 6.93E-01 | 6.93E+01 |  |  |
| 7901247 | NM_172225    | DMBX1    | diencephalon/mesencephalon homeobox               | -0.021 | 0.985 | 8.34E-01 | 8.34E+01 |  |  |
| 7901253 | BC144026     | C1orf223 | chromosome 1 open reading frame                   | -0.137 | 0.909 | 5.19E-01 | 5.19E+01 |  |  |
| 7901299 | NM_016308    | CMPK1    | cytidine monophosphate (UMP)-CMP kinase           | 0.057  | 1.041 | 6.35E-01 | 6.35E+01 |  |  |
| 7901309 | NM_012186    | FOXE3    | forkhead box E3                                   | -0.002 | 0.999 | 9.90E-01 | 9.90E+01 |  |  |
| 7901311 | NM_004474    | FOXO2    | forkhead box O2                                   | -0.040 | 0.973 | 7.58E-01 | 7.58E+01 |  |  |
| 7901314 | ---          | ---      | ---                                               | -0.102 | 0.932 | 4.51E-01 | 4.51E+01 |  |  |
| 7901336 | NM_018571    | STRADB   | STE20-related kinase adaptor beta                 | -0.005 | 0.997 | 9.91E-01 | 9.91E+01 |  |  |
| 7901357 | ---          | ---      | ---                                               | -0.012 | 0.992 | 9.49E-01 | 9.49E+01 |  |  |
| 7901376 | NM_014372    | RNF11    | ring finger protein 11                            | -0.019 | 0.987 | 9.27E-01 | 9.27E+01 |  |  |
| 7901385 | NM_024586    | OSBPL9   | oxysterol binding protein-like 9                  | 0.040  | 1.028 | 7.57E-01 | 7.57E+01 |  |  |
| 7901418 | NM_152265    | BTF3L4   | basic transcription factor 3-like 4               | 0.151  | 1.111 | 3.19E-01 | 3.19E+01 |  |  |
| 7901443 | ---          | ---      | ---                                               | -0.002 | 0.998 | 9.90E-01 | 9.90E+01 |  |  |
| 7901445 | ---          | ---      | ---                                               | -0.066 | 0.955 | 5.41E-01 | 5.41E+01 |  |  |
| 7901447 | NM_032864    | PRPF38A  | PRP38 pre-mRNA processing factor                  | -0.015 | 0.989 | 9.49E-01 | 9.49E+01 |  |  |
| 7901460 | NM_015696    | GPX7     | glutathione peroxidase 7                          | -0.052 | 0.965 | 7.16E-01 | 7.16E+01 |  |  |
| 7901466 | NM_00104269  | FAM159A  | family with sequence similarity 15                | 0.094  | 1.067 | 4.96E-01 | 4.96E+01 |  |  |

|         |              |          |                                      |        |       |          |          |  |  |
|---------|--------------|----------|--------------------------------------|--------|-------|----------|----------|--|--|
| 7901477 | ---          | ---      | ---                                  | -0.028 | 0.980 | 8.69E-01 | 8.69E+01 |  |  |
| 7901479 | NM_024646    | ZYG11B   | zyg-11 homolog B (C. elegans)        | 0.016  | 1.011 | 9.53E-01 | 9.53E+01 |  |  |
| 7901513 | NM_002979    | SCP2     | sterol carrier protein 2             | 0.170  | 1.125 | 1.52E-01 | 1.52E+01 |  |  |
| 7901535 | NM_153703    | PODN     | podocan                              | -0.039 | 0.973 | 7.05E-01 | 7.05E+01 |  |  |
| 7901549 | NM_000098    | CPT2     | carnitine palmitoyltransferase 2     | 0.069  | 1.049 | 4.87E-01 | 4.87E+01 |  |  |
| 7901557 | NM_033067    | DMRTB1   | DMRT-like family B with proline-ri   | 0.001  | 1.000 | 9.98E-01 | 9.98E+01 |  |  |
| 7901565 | NM_000792    | DIO1     | deiodinase, iodothyronine, type I    | 0.038  | 1.027 | 9.00E-01 | 9.00E+01 |  |  |
| 7901577 | NM_052940    | LRRC42   | leucine rich repeat containing 42    | -0.046 | 0.969 | 7.68E-01 | 7.68E+01 |  |  |
| 7901592 | BC035374     | C1orf83  | chromosome 1 open reading fram       | 0.026  | 1.018 | 9.18E-01 | 9.18E+01 |  |  |
| 7901601 | NM_016491    | MRPL37   | mitochondrial ribosomal protein L    | -0.020 | 0.986 | 9.27E-01 | 9.27E+01 |  |  |
| 7901611 | ENST00000361 | C1orf191 | chromosome 1 open reading fram       | 0.050  | 1.035 | 6.75E-01 | 6.75E+01 |  |  |
| 7901613 | NM_147161    | ACOT11   | acyl-CoA thioesterase 11             | -0.076 | 0.948 | 4.69E-01 | 4.69E+01 |  |  |
| 7901662 | NM_004623    | TTC4     | tetratricopeptide repeat domain 4    | -0.014 | 0.990 | 9.56E-01 | 9.56E+01 |  |  |
| 7901687 | NM_182532    | TMEM61   | transmembrane protein 61             | -0.081 | 0.945 | 4.03E-01 | 4.03E+01 |  |  |
| 7901691 | NM_057176    | BSND     | Barter syndrome, infantile, with s   | 0.011  | 1.008 | 9.53E-01 | 9.53E+01 |  |  |
| 7901696 | NM_174936    | PCSK9    | proprotein convertase subtilisin/k   | -0.029 | 0.980 | 8.05E-01 | 8.05E+01 |  |  |
| 7901714 | ---          | ---      | ---                                  | -0.016 | 0.989 | 9.28E-01 | 9.28E+01 |  |  |
| 7901744 | ---          | ---      | ---                                  | -0.015 | 0.990 | 9.52E-01 | 9.52E+01 |  |  |
| 7901746 | ---          | ---      | ---                                  | -0.035 | 0.976 | 7.91E-01 | 7.91E+01 |  |  |
| 7901748 | NM_00111341  | FGGY     | FGGY carbohydrate kinase domain      | 0.071  | 1.050 | 7.68E-01 | 7.68E+01 |  |  |
| 7901804 | NM_176877    | INADL    | InaD-like (Drosophila)               | -0.026 | 0.982 | 9.50E-01 | 9.50E+01 |  |  |
| 7901852 | ---          | ---      | ---                                  | 0.144  | 1.105 | 5.47E-01 | 5.47E+01 |  |  |
| 7901856 | ---          | ---      | ---                                  | 0.065  | 1.046 | 6.08E-01 | 6.08E+01 |  |  |
| 7901858 | ---          | ---      | ---                                  | 0.033  | 1.023 | 8.84E-01 | 8.84E+01 |  |  |
| 7901867 | NM_003368    | USP1     | ubiquitin specific peptidase 1       | 0.024  | 1.017 | 8.73E-01 | 8.73E+01 |  |  |
| 7901915 | NM_013339    | ALG6     | asparagine-linked glycosylation 6,   | 0.053  | 1.038 | 7.74E-01 | 7.74E+01 |  |  |
| 7901951 | NM_002633    | PGM1     | phosphoglucomutase 1                 | -0.044 | 0.970 | 7.23E-01 | 7.23E+01 |  |  |
| 7901969 | NM_005012    | ROR1     | receptor tyrosine kinase-like orph   | 0.013  | 1.009 | 9.56E-01 | 9.56E+01 |  |  |
| 7902036 | ---          | ---      | ---                                  | -0.059 | 0.960 | 5.73E-01 | 5.73E+01 |  |  |
| 7902038 | NM_00100535  | AK3L1    | adenylate kinase 3-like 1            | 0.022  | 1.015 | 9.12E-01 | 9.12E+01 |  |  |
| 7902074 | NM_002303    | LEPR     | leptin receptor                      | 0.172  | 1.126 | 4.28E-01 | 4.28E+01 |  |  |
| 7902104 | NM_002600    | PDE4B    | phosphodiesterase 4B, cAMP-spec      | -0.211 | 0.864 | 2.46E-02 | 2.46E+00 |  |  |
| 7902166 | NM_020948    | MIER1    | mesoderm induction early respon      | 0.037  | 1.026 | 7.03E-01 | 7.03E+01 |  |  |
| 7902205 | NM_001559    | IL12RB2  | interleukin 12 receptor, beta 2      | -0.130 | 0.914 | 7.17E-01 | 7.17E+01 |  |  |
| 7902223 | ---          | ---      | ---                                  | 0.029  | 1.021 | 9.49E-01 | 9.49E+01 |  |  |
| 7902265 | ---          | ---      | ---                                  | -0.012 | 0.992 | 9.53E-01 | 9.53E+01 |  |  |
| 7902267 | NR_023916    | PIN1L    | peptidylprolyl cis/trans isomerase   | 0.047  | 1.033 | 5.93E-01 | 5.93E+01 |  |  |
| 7902269 | NM_004768    | SFRS11   | splicing factor, arginine/serine-ric | -0.065 | 0.956 | 4.05E-01 | 4.05E+01 |  |  |
| 7902282 | NM_00103664  | HHLA3    | HERV-H LTR-associating 3             | -0.047 | 0.968 | 9.08E-01 | 9.08E+01 |  |  |
| 7902345 | NM_138467    | TYW3     | tRNA-yW synthesizing protein 3 h     | 0.044  | 1.031 | 7.52E-01 | 7.52E+01 |  |  |
| 7902367 | NM_000016    | ACADM    | acyl-Coenzyme A dehydrogenase,       | 0.100  | 1.072 | 2.97E-01 | 2.97E+01 |  |  |
| 7902382 | NM_004582    | RABGGTB  | Rab geranylgeranyltransferase, be    | 0.000  | 1.000 | 1.00E+00 | 1.00E+02 |  |  |
| 7902396 | NR_003042    | SNORD45C | small nucleolar RNA, C/D box 45C     | -0.129 | 0.914 | 5.64E-01 | 5.64E+01 |  |  |
| 7902398 | NR_002749    | SNORD45A | small nucleolar RNA, C/D box 45A     | 0.137  | 1.100 | 6.48E-01 | 6.48E+01 |  |  |
| 7902400 | NR_002748    | SNORD45B | small nucleolar RNA, C/D box 45B     | -0.088 | 0.941 | 8.24E-01 | 8.24E+01 |  |  |
| 7902435 | ---          | ---      | ---                                  | 0.017  | 1.012 | 9.48E-01 | 9.48E+01 |  |  |
| 7902448 | NM_00103500  | RPL17    | ribosomal protein L17                | -0.020 | 0.986 | 8.95E-01 | 8.95E+01 |  |  |
| 7902472 | ---          | ---      | ---                                  | 0.068  | 1.048 | 7.08E-01 | 7.08E+01 |  |  |
| 7902474 | ---          | ---      | ---                                  | 0.198  | 1.147 | 2.51E-01 | 2.51E+01 |  |  |
| 7902476 | BX537792     | FAM73A   | family with sequence similarity 73   | 0.070  | 1.050 | 6.65E-01 | 6.65E+01 |  |  |
| 7902493 | ---          | ---      | ---                                  | 0.019  | 1.013 | 9.09E-01 | 9.09E+01 |  |  |
| 7902541 | NM_006820    | IFI44L   | interferon-induced protein 44-like   | 0.416  | 1.334 | 4.83E-01 | 4.83E+01 |  |  |
| 7902553 | NM_006417    | IFI44    | interferon-induced protein 44        | 0.272  | 1.208 | 5.54E-01 | 5.54E+01 |  |  |
| 7902592 | NM_006465    | ARID3B   | AT rich interactive domain 3B (BRI   | -0.132 | 0.912 | 2.16E-01 | 2.16E+01 |  |  |
| 7902594 | NM_182948    | PRKACB   | protein kinase, cAMP-dependent,      | 0.082  | 1.058 | 6.00E-01 | 6.00E+01 |  |  |
| 7902611 | ---          | ---      | ---                                  | 0.043  | 1.030 | 8.32E-01 | 8.32E+01 |  |  |
| 7902634 | NM_025065    | BXDC5    | brix domain containing 5             | 0.000  | 1.000 | 9.99E-01 | 9.99E+01 |  |  |
| 7902700 | ---          | ---      | ---                                  | -0.091 | 0.939 | 8.06E-01 | 8.06E+01 |  |  |
| 7902771 | NM_016009    | SH3GLB1  | SH3-domain GRB2-like endophilin      | 0.001  | 1.001 | 9.97E-01 | 9.97E+01 |  |  |
| 7902789 | NM_012262    | HS2ST1   | heparan sulfate 2-O-sulfotransfer    | -0.076 | 0.949 | 6.90E-01 | 6.90E+01 |  |  |
| 7902822 | NM_006256    | PKN2     | protein kinase N2                    | 0.042  | 1.030 | 7.49E-01 | 7.49E+01 |  |  |
| 7902848 | ---          | ---      | ---                                  | 0.131  | 1.095 | 6.35E-01 | 6.35E+01 |  |  |
| 7902861 | NM_00113447  | LRRC8B   | leucine rich repeat containing 8 fa  | 0.137  | 1.100 | 2.63E-01 | 2.63E+01 |  |  |
| 7902874 | NM_032270    | LRRC8C   | leucine rich repeat containing 8 fa  | 0.071  | 1.050 | 6.05E-01 | 6.05E+01 |  |  |
| 7902883 | NM_00113447  | LRRC8D   | leucine rich repeat containing 8 fa  | -0.076 | 0.949 | 5.93E-01 | 5.93E+01 |  |  |
| 7902891 | NM_182976    | ZNF326   | zinc finger protein 326              | 0.023  | 1.016 | 9.13E-01 | 9.13E+01 |  |  |
| 7902909 | ---          | ---      | ---                                  | 0.034  | 1.024 | 8.16E-01 | 8.16E+01 |  |  |
| 7902911 | ---          | ---      | ---                                  | 0.011  | 1.008 | 9.49E-01 | 9.49E+01 |  |  |
| 7902913 | NM_003503    | CDC7     | cell division cycle 7 homolog (S. ce | -0.069 | 0.953 | 7.83E-01 | 7.83E+01 |  |  |
| 7902930 | NR_003130    | HSP90B3P | heat shock protein 90kDa beta (Gr    | 0.127  | 1.092 | 1.76E-01 | 1.76E+01 |  |  |
| 7902992 | NM_024813    | RPAP2    | RNA polymerase II associated prot    | -0.002 | 0.999 | 9.94E-01 | 9.94E+01 |  |  |
| 7903010 | NM_000969    | RPL5     | ribosomal protein L5                 | 0.005  | 1.003 | 9.78E-01 | 9.78E+01 |  |  |
| 7903022 | NR_000006    | SNORD21  | small nucleolar RNA, C/D box 21      | -0.055 | 0.962 | 8.98E-01 | 8.98E+01 |  |  |
| 7903032 | NM_007358    | MTF2     | metal response element binding t     | 0.027  | 1.019 | 8.76E-01 | 8.76E+01 |  |  |
| 7903079 | NM_001938    | DR1      | down-regulator of transcription 1,   | -0.066 | 0.955 | 5.09E-01 | 5.09E+01 |  |  |
| 7903092 | NM_00102494  | FNBP1L   | formin binding protein 1-like        | -0.082 | 0.945 | 8.41E-01 | 8.41E+01 |  |  |
| 7903119 | NM_002858    | ABCD3    | ATP-binding cassette, sub-family G   | 0.044  | 1.031 | 8.27E-01 | 8.27E+01 |  |  |

|         |             |           |                                      |        |       |          |          |  |  |
|---------|-------------|-----------|--------------------------------------|--------|-------|----------|----------|--|--|
| 7903171 | NM_015485   | RWDD3     | RWD domain containing 3              | 0.062  | 1.044 | 7.12E-01 | 7.12E+01 |  |  |
| 7903183 | ---         | ---       | ---                                  | -0.007 | 0.995 | 9.72E-01 | 9.72E+01 |  |  |
| 7903188 | NM_021190   | PTBP2     | polypyrimidine tract binding prote   | -0.031 | 0.979 | 8.73E-01 | 8.73E+01 |  |  |
| 7903281 | NM_012243   | SLC35A3   | solute carrier family 35 (UDP-N-ac   | 0.081  | 1.058 | 6.57E-01 | 6.57E+01 |  |  |
| 7903294 | NM_033055   | HIAT1     | hippocampus abundant transcript      | 0.009  | 1.006 | 9.72E-01 | 9.72E+01 |  |  |
| 7903308 | NM_019083   | CCDC76    | coiled-coil domain containing 76     | 0.041  | 1.029 | 8.27E-01 | 8.27E+01 |  |  |
| 7903321 | NM_00113084 | RTCD1     | RNA terminal phosphate cyclase d     | 0.053  | 1.038 | 6.60E-01 | 6.60E+01 |  |  |
| 7903334 | NM_003672   | CDC14A    | CDC14 cell division cycle 14 homol   | -0.063 | 0.957 | 7.45E-01 | 7.45E+01 |  |  |
| 7903355 | NM_022049   | GPR88     | G protein-coupled receptor 88        | -0.048 | 0.968 | 6.62E-01 | 6.62E+01 |  |  |
| 7903358 | NM_001078   | VCAM1     | vascular cell adhesion molecule 1    | 0.046  | 1.032 | 9.17E-01 | 9.17E+01 |  |  |
| 7903369 | NM_133496   | SLC30A7   | solute carrier family 30 (zinc trans | 0.050  | 1.036 | 7.01E-01 | 7.01E+01 |  |  |
| 7903389 | ---         | ---       | ---                                  | -0.041 | 0.972 | 9.09E-01 | 9.09E+01 |  |  |
| 7903393 | NM_001400   | S1PR1     | sphingosine-1-phosphate recepto      | -0.131 | 0.913 | 2.58E-01 | 2.58E+01 |  |  |
| 7903404 | NM_017619   | RNPC3     | RNA-binding region (RNP1, RRM) d     | -0.054 | 0.963 | 7.87E-01 | 7.87E+01 |  |  |
| 7903407 | NM_020978   | AMY2B     | amylase, alpha 2B (pancreatic)       | -0.010 | 0.993 | 9.79E-01 | 9.79E+01 |  |  |
| 7903414 | NM_000699   | AMY2A     | amylase, alpha 2A (pancreatic)       | 0.067  | 1.048 | 8.53E-01 | 8.53E+01 |  |  |
| 7903425 | NM_004038   | AMY1A     | amylase, alpha 1A (salivary)         | 0.070  | 1.049 | 8.13E-01 | 8.13E+01 |  |  |
| 7903440 | NM_004038   | AMY1A     | amylase, alpha 1A (salivary)         | 0.070  | 1.049 | 8.13E-01 | 8.13E+01 |  |  |
| 7903474 | ---         | ---       | ---                                  | 0.063  | 1.044 | 6.16E-01 | 6.16E+01 |  |  |
| 7903478 | NM_00114398 | NBPF4     | neuroblastoma breakpoint family,     | 0.025  | 1.017 | 8.78E-01 | 8.78E+01 |  |  |
| 7903490 | NM_00114398 | NBPF6     | neuroblastoma breakpoint family,     | 0.051  | 1.036 | 6.08E-01 | 6.08E+01 |  |  |
| 7903507 | NM_00101088 | FAM102B   | family with sequence similarity 10   | -0.024 | 0.984 | 9.49E-01 | 9.49E+01 |  |  |
| 7903519 | NM_018061   | PRPF38B   | PRP38 pre-mRNA processing facto      | -0.044 | 0.970 | 6.64E-01 | 6.64E+01 |  |  |
| 7903541 | NM_007269   | STXBP3    | syntaxin binding protein 3           | -0.002 | 0.998 | 9.92E-01 | 9.92E+01 |  |  |
| 7903582 | NM_00103500 | RPL17     | ribosomal protein L17                | -0.030 | 0.980 | 8.32E-01 | 8.32E+01 |  |  |
| 7903586 | NM_020141   | TMEM167B  | transmembrane protein 167B           | 0.002  | 1.002 | 9.92E-01 | 9.92E+01 |  |  |
| 7903592 | NM_020775   | KIAA1324  | KIAA1324                             | -0.018 | 0.988 | 9.42E-01 | 9.42E+01 |  |  |
| 7903619 | NM_006513   | SARS      | seryl-tRNA synthetase                | 0.018  | 1.012 | 9.24E-01 | 9.24E+01 |  |  |
| 7903632 | NM_001408   | CELSR2    | cadherin, EGF LAG seven-pass G-ty    | -0.033 | 0.977 | 7.22E-01 | 7.22E+01 |  |  |
| 7903667 | NM_00104070 | SYPL2     | synaptophysin-like 2                 | 0.055  | 1.039 | 4.48E-01 | 4.48E+01 |  |  |
| 7903676 | NM_153340   | ATXN7L2   | ataxin 7-like 2                      | -0.034 | 0.977 | 7.09E-01 | 7.09E+01 |  |  |
| 7903688 | NM_182580   | CYB561D1  | cytochrome b-561 domain contain      | 0.096  | 1.069 | 2.58E-01 | 2.58E+01 |  |  |
| 7903694 | NM_031936   | GPR61     | G protein-coupled receptor 61        | -0.046 | 0.969 | 6.40E-01 | 6.40E+01 |  |  |
| 7903703 | NM_006496   | GNAI3     | guanine nucleotide binding protei    | 0.039  | 1.027 | 8.41E-01 | 8.41E+01 |  |  |
| 7903717 | ---         | ---       | ---                                  | -0.095 | 0.937 | 1.88E-01 | 1.88E+01 |  |  |
| 7903719 | NM_004037   | AMPD2     | adenosine monophosphate deami        | -0.100 | 0.933 | 3.78E-01 | 3.78E+01 |  |  |
| 7903742 | NM_000850   | GSTM4     | glutathione S-transferase mu 4       | 0.147  | 1.107 | 7.15E-01 | 7.15E+01 |  |  |
| 7903753 | NM_000848   | GSTM2     | glutathione S-transferase mu 2 (m    | 0.277  | 1.212 | 5.88E-02 | 5.88E+00 |  |  |
| 7903765 | NM_000561   | GSTM1     | glutathione S-transferase mu 1       | 0.052  | 1.037 | 9.24E-01 | 9.24E+01 |  |  |
| 7903786 | NM_000757   | CSF1      | colony stimulating factor 1 (macro   | 0.020  | 1.014 | 9.63E-01 | 9.63E+01 |  |  |
| 7903803 | NM_006621   | AHCYL1    | adenosylhomocysteinase-like 1        | 0.082  | 1.058 | 5.45E-01 | 5.45E+01 |  |  |
| 7903827 | NM_033088   | FAM40A    | family with sequence similarity 40   | 0.052  | 1.037 | 7.16E-01 | 7.16E+01 |  |  |
| 7903854 | NM_00101089 | SLC6A17   | solute carrier family 6, member 17   | -0.054 | 0.963 | 7.51E-01 | 7.51E+01 |  |  |
| 7903867 | NM_004978   | KCNK4     | potassium voltage-gated channel,     | -0.039 | 0.973 | 7.53E-01 | 7.53E+01 |  |  |
| 7903878 | NM_022768   | RBM15     | RNA binding motif protein 15         | 0.044  | 1.031 | 6.24E-01 | 6.24E+01 |  |  |
| 7903884 | NM_032414   | PROK1     | prokineticin 1                       | 0.023  | 1.016 | 8.51E-01 | 8.51E+01 |  |  |
| 7903893 | NM_000560   | CD53      | CD53 molecule                        | 0.095  | 1.068 | 1.65E-01 | 1.65E+01 |  |  |
| 7903908 | NM_006090   | CEPT1     | choline/ethanolamine phosphotra      | 0.224  | 1.168 | 1.41E-03 | 1.41E-01 |  |  |
| 7903920 | NM_00102519 | CHI3L2    | chitinase 3-like 2                   | -0.141 | 0.907 | 5.07E-01 | 5.07E+01 |  |  |
| 7903970 | ---         | ---       | ---                                  | 0.054  | 1.038 | 8.72E-01 | 8.72E+01 |  |  |
| 7903972 | NM_001688   | ATP5F1    | ATP synthase, H+ transporting, mi    | 0.194  | 1.144 | 3.67E-02 | 3.67E+00 |  |  |
| 7903988 | NM_00101093 | RAP1A     | RAP1A, member of RAS oncogene        | 0.115  | 1.083 | 2.11E-01 | 2.11E+01 |  |  |
| 7904000 | NM_007204   | DDX20     | DEAD (Asp-Glu-Ala-Asp) box polyp     | -0.035 | 0.976 | 8.78E-01 | 8.78E+01 |  |  |
| 7904018 | NM_018704   | CTTNBP2NL | CTTNBP2 N-terminal like              | 0.076  | 1.054 | 8.67E-01 | 8.67E+01 |  |  |
| 7904036 | NM_006135   | CAPZA1    | capping protein (actin filament) m   | 0.146  | 1.106 | 8.25E-03 | 8.25E-01 |  |  |
| 7904048 | ---         | ---       | ---                                  | 0.149  | 1.109 | 3.60E-01 | 3.60E+01 |  |  |
| 7904050 | NM_020963   | MOV10     | Mov10, Moloney leukemia virus 1      | 0.014  | 1.009 | 9.56E-01 | 9.56E+01 |  |  |
| 7904073 | NM_00100444 | FAM19A3   | family with sequence similarity 19   | -0.135 | 0.911 | 9.93E-02 | 9.93E+00 |  |  |
| 7904084 | NR_002796   | AFARP1    | AKR7 family pseudogene               | -0.005 | 0.997 | 9.85E-01 | 9.85E+01 |  |  |
| 7904086 | NM_014813   | LRIG2     | leucine-rich repeats and immunog     | 0.134  | 1.097 | 2.25E-01 | 2.25E+01 |  |  |
| 7904106 | NM_152900   | MAGI3     | membrane associated guanylate k      | -0.209 | 0.865 | 6.78E-03 | 6.78E-01 |  |  |
| 7904131 | NM_022836   | DCLRE1B   | DNA cross-link repair 1B (PSO2 ho    | 0.304  | 1.235 | 4.40E-02 | 4.40E+00 |  |  |
| 7904137 | NM_198268   | HIPK1     | homeodomain interacting protein      | -0.042 | 0.971 | 7.89E-01 | 7.89E+01 |  |  |
| 7904164 | ---         | ---       | ---                                  | -0.138 | 0.908 | 7.08E-01 | 7.08E+01 |  |  |
| 7904166 | ---         | ---       | ---                                  | 0.104  | 1.075 | 7.22E-01 | 7.22E+01 |  |  |
| 7904209 | ---         | ---       | ---                                  | -0.056 | 0.962 | 6.14E-01 | 6.14E+01 |  |  |
| 7904226 | NM_018420   | SLC22A15  | solute carrier family 22, member 1   | -0.005 | 0.997 | 9.90E-01 | 9.90E+01 |  |  |
| 7904254 | NM_000701   | ATP1A1    | ATPase, Na+/K+ transporting, alph    | 0.054  | 1.038 | 7.15E-01 | 7.15E+01 |  |  |
| 7904287 | NM_001767   | CD2       | CD2 molecule                         | -0.147 | 0.903 | 1.73E-01 | 1.73E+01 |  |  |
| 7904303 | NM_004258   | IGSF2     | immunoglobulin superfamily, mer      | 0.253  | 1.192 | 7.05E-02 | 7.05E+00 |  |  |
| 7904314 | NM_003594   | TTF2      | transcription termination factor, R  | 0.000  | 1.000 | 1.00E+00 | 1.00E+02 |  |  |
| 7904340 | NM_006699   | MAN1A2    | mannosidase, alpha, class 1A, mer    | 0.059  | 1.042 | 5.54E-01 | 5.54E+01 |  |  |
| 7904361 | NM_017709   | FAM46C    | family with sequence similarity 46   | -0.020 | 0.986 | 9.44E-01 | 9.44E+01 |  |  |
| 7904394 | ---         | ---       | ---                                  | 0.143  | 1.104 | 3.47E-01 | 3.47E+01 |  |  |
| 7904433 | NM_006623   | PHGDH     | phosphoglycerate dehydrogenase       | -0.010 | 0.993 | 9.61E-01 | 9.61E+01 |  |  |
| 7904448 | ---         | ---       | ---                                  | -0.024 | 0.984 | 8.50E-01 | 8.50E+01 |  |  |
| 7904463 | ---         | ---       | ---                                  | -0.063 | 0.957 | 5.86E-01 | 5.86E+01 |  |  |

|         |              |             |                                     |        |       |          |          |  |  |
|---------|--------------|-------------|-------------------------------------|--------|-------|----------|----------|--|--|
| 7904465 | NR_027337    | HIST2H2BA   | histone cluster 2, H2ba             | 0.075  | 1.054 | 6.00E-01 | 6.00E+01 |  |  |
| 7904469 | NM_015326    | SRGAP2      | SLIT-ROBO Rho GTPase activating     | 0.168  | 1.124 | 3.26E-01 | 3.26E+01 |  |  |
| 7904478 | AF172850     | LOC51152    | melanoma antigen                    | 0.079  | 1.056 | 8.84E-01 | 8.84E+01 |  |  |
| 7904480 | ---          | ---         | ---                                 | -0.142 | 0.906 | 7.24E-01 | 7.24E+01 |  |  |
| 7904482 | NM_015326    | SRGAP2      | SLIT-ROBO Rho GTPase activating     | 0.059  | 1.042 | 8.31E-01 | 8.31E+01 |  |  |
| 7904486 | AK294414     | NBPF20      | neuroblastoma breakpoint family,    | -0.017 | 0.988 | 8.78E-01 | 8.78E+01 |  |  |
| 7904500 | ENST00000436 | NBPF12      | neuroblastoma breakpoint family,    | 0.002  | 1.002 | 9.86E-01 | 9.86E+01 |  |  |
| 7904506 | AK095030     | NBPF20      | neuroblastoma breakpoint family,    | -0.001 | 0.999 | 9.95E-01 | 9.95E+01 |  |  |
| 7904562 | AK294944     | NBPF14      | neuroblastoma breakpoint family,    | -0.003 | 0.998 | 9.81E-01 | 9.81E+01 |  |  |
| 7904569 | ---          | ---         | ---                                 | 0.016  | 1.011 | 8.70E-01 | 8.70E+01 |  |  |
| 7904572 | ---          | ---         | ---                                 | -0.042 | 0.972 | 9.50E-01 | 9.50E+01 |  |  |
| 7904574 | NM_00103970  | NBPF10      | neuroblastoma breakpoint family,    | -0.059 | 0.960 | 5.01E-01 | 5.01E+01 |  |  |
| 7904693 | ---          | ---         | ---                                 | -0.283 | 0.822 | 1.76E-01 | 1.76E+01 |  |  |
| 7904695 | NM_004892    | SEC22B      | SEC22 vesicle trafficking protein h | 0.010  | 1.007 | 9.73E-01 | 9.73E+01 |  |  |
| 7904702 | NM_203458    | NOTCH2NL    | Notch homolog 2 (Drosophila) N-t    | -0.018 | 0.988 | 9.29E-01 | 9.29E+01 |  |  |
| 7904713 | ---          | ---         | ---                                 | 0.076  | 1.054 | 7.61E-01 | 7.61E+01 |  |  |
| 7904715 | ---          | ---         | ---                                 | -0.261 | 0.835 | 1.55E-01 | 1.55E+01 |  |  |
| 7904737 | NM_00103988  | ANKRD34A    | ankyrin repeat domain 34A           | -0.031 | 0.979 | 8.09E-01 | 8.09E+01 |  |  |
| 7904742 | NM_153713    | LIX1L       | Lix1 homolog (mouse)-like           | -0.034 | 0.977 | 8.10E-01 | 8.10E+01 |  |  |
| 7904751 | BC017770     | RBM8A       | RNA binding motif protein 8A        | -0.177 | 0.885 | 1.02E-01 | 1.02E+01 |  |  |
| 7904755 | NM_003846    | PEX11B      | peroxisomal biogenesis factor 11 b  | 0.039  | 1.028 | 7.91E-01 | 7.91E+01 |  |  |
| 7904812 | NM_006099    | PIAS3       | protein inhibitor of activated STAT | -0.044 | 0.970 | 7.97E-01 | 7.97E+01 |  |  |
| 7904830 | NM_014455    | RNF115      | ring finger protein 115             | -0.035 | 0.976 | 8.39E-01 | 8.39E+01 |  |  |
| 7904853 | NM_00109761  | GPR89A      | G protein-coupled receptor 89A      | 0.008  | 1.005 | 9.77E-01 | 9.77E+01 |  |  |
| 7904863 | ---          | ---         | ---                                 | 0.025  | 1.018 | 8.58E-01 | 8.58E+01 |  |  |
| 7904869 | NM_00113011  | FAM108A1    | family with sequence similarity 10  | -0.011 | 0.992 | 9.37E-01 | 9.37E+01 |  |  |
| 7904874 | NM_183372    | RP11-94I2.2 | neuroblastoma breakpoint family,    | -0.006 | 0.996 | 9.66E-01 | 9.66E+01 |  |  |
| 7904879 | ---          | ---         | ---                                 | -0.006 | 0.996 | 9.77E-01 | 9.77E+01 |  |  |
| 7904881 | NR_002305    | PDIA3P      | protein disulfide isomerase family  | 0.262  | 1.199 | 1.98E-02 | 1.98E+00 |  |  |
| 7904883 | NM_004284    | CHD1L       | chromodomain helicase DNA bind      | -0.020 | 0.986 | 9.50E-01 | 9.50E+01 |  |  |
| 7904907 | NM_004326    | BCL9        | B-cell CLL/lymphoma 9               | 0.009  | 1.006 | 9.70E-01 | 9.70E+01 |  |  |
| 7904930 | NM_016334    | GPR89B      | G protein-coupled receptor 89B      | 0.013  | 1.009 | 9.57E-01 | 9.57E+01 |  |  |
| 7904948 | NM_00113011  | FAM108A1    | family with sequence similarity 10  | -0.011 | 0.992 | 9.37E-01 | 9.37E+01 |  |  |
| 7904955 | ---          | ---         | ---                                 | 0.015  | 1.011 | 9.19E-01 | 9.19E+01 |  |  |
| 7904959 | ---          | ---         | ---                                 | -0.143 | 0.906 | 7.39E-01 | 7.39E+01 |  |  |
| 7904963 | ---          | ---         | ---                                 | -0.142 | 0.906 | 7.24E-01 | 7.24E+01 |  |  |
| 7904965 | AB042555     | PDE4DIP     | phosphodiesterase 4D interacting    | -0.161 | 0.894 | 1.03E-01 | 1.03E+01 |  |  |
| 7904969 | NM_030796    | VOPP1       | vesicular, overexpressed in cancer  | 0.031  | 1.022 | 8.45E-01 | 8.45E+01 |  |  |
| 7904974 | NR_003242    | C1orf152    | profilin 1 pseudogene               | 0.127  | 1.092 | 6.94E-02 | 6.94E+00 |  |  |
| 7904976 | NM_00110266  | NBPF16      | neuroblastoma breakpoint family,    | -0.060 | 0.959 | 4.37E-01 | 4.37E+01 |  |  |
| 7904997 | NM_00114388  | PPIAL4B     | peptidylprolyl isomerase A (cyclo   | -0.042 | 0.972 | 7.09E-01 | 7.09E+01 |  |  |
| 7904999 | NM_00110266  | NBPF16      | neuroblastoma breakpoint family,    | -0.050 | 0.966 | 5.59E-01 | 5.59E+01 |  |  |
| 7905016 | NM_00114388  | PPIAL4B     | peptidylprolyl isomerase A (cyclo   | -0.042 | 0.972 | 7.09E-01 | 7.09E+01 |  |  |
| 7905018 | AK095105     | FLJ37786    | hypothetical LOC642691              | -0.060 | 0.959 | 5.17E-01 | 5.17E+01 |  |  |
| 7905020 | NM_000798    | DRD5        | dopamine receptor D5                | 0.043  | 1.030 | 7.20E-01 | 7.20E+01 |  |  |
| 7905028 | CR541728     | LSP1        | lymphocyte-specific protein 1       | 0.052  | 1.037 | 7.94E-01 | 7.94E+01 |  |  |
| 7905035 | ---          | ---         | ---                                 | -0.018 | 0.988 | 8.86E-01 | 8.86E+01 |  |  |
| 7905037 | ---          | ---         | ---                                 | -0.046 | 0.968 | 7.97E-01 | 7.97E+01 |  |  |
| 7905043 | NR_027002    | LOC388692   | hypothetical LOC388692              | -0.031 | 0.979 | 8.44E-01 | 8.44E+01 |  |  |
| 7905051 | NM_00114388  | PPIAL4B     | peptidylprolyl isomerase A (cyclo   | 0.032  | 1.022 | 8.41E-01 | 8.41E+01 |  |  |
| 7905054 | ---          | ---         | ---                                 | -0.311 | 0.806 | 1.28E-01 | 1.28E+01 |  |  |
| 7905058 | NR_027002    | LOC388692   | hypothetical LOC388692              | 0.027  | 1.019 | 9.08E-01 | 9.08E+01 |  |  |
| 7905067 | NM_003548    | HIST2H4A    | histone cluster 2, H4a              | -0.111 | 0.926 | 6.16E-01 | 6.16E+01 |  |  |
| 7905079 | NM_003516    | HIST2H2AA3  | histone cluster 2, H2aa3            | -0.194 | 0.874 | 2.82E-01 | 2.82E+01 |  |  |
| 7905085 | NM_00100546  | HIST2H3A    | histone cluster 2, H3a              | -0.052 | 0.965 | 6.82E-01 | 6.82E+01 |  |  |
| 7905088 | NM_003517    | HIST2H2AC   | histone cluster 2, H2ac             | -0.022 | 0.985 | 9.06E-01 | 9.06E+01 |  |  |
| 7905092 | NM_016074    | BOLA1       | bolA homolog 1 (E. coli)            | -0.077 | 0.948 | 4.51E-01 | 4.51E+01 |  |  |
| 7905099 | NM_007259    | VPS45       | vacuolar protein sorting 45 homol   | 0.105  | 1.075 | 6.04E-01 | 6.04E+01 |  |  |
| 7905116 | NM_016274    | PLEKHO1     | pleckstrin homology domain conta    | 0.162  | 1.119 | 3.47E-01 | 3.47E+01 |  |  |
| 7905127 | ---          | ---         | ---                                 | 0.013  | 1.009 | 9.63E-01 | 9.63E+01 |  |  |
| 7905163 | NM_018997    | MRPS21      | mitochondrial ribosomal protein S   | -0.023 | 0.984 | 9.31E-01 | 9.31E+01 |  |  |
| 7905171 | NM_004698    | PRPF3       | PRP3 pre-mRNA processing factor     | -0.035 | 0.976 | 7.56E-01 | 7.56E+01 |  |  |
| 7905185 | NM_015203    | RPRD2       | regulation of nuclear pre-mRNA d    | -0.121 | 0.920 | 1.45E-01 | 1.45E+01 |  |  |
| 7905198 | NM_025150    | TARS2       | threonyl-tRNA synthetase 2, mitoc   | 0.023  | 1.016 | 8.80E-01 | 8.80E+01 |  |  |
| 7905220 | NM_004425    | ECM1        | extracellular matrix protein 1      | 0.080  | 1.057 | 5.44E-01 | 5.44E+01 |  |  |
| 7905233 | NM_019032    | ADAMTSL4    | ADAMTS-like 4                       | 0.015  | 1.011 | 9.34E-01 | 9.34E+01 |  |  |
| 7905258 | NM_00114541  | SETDB1      | SET domain, bifurcated 1            | 0.041  | 1.029 | 7.87E-01 | 7.87E+01 |  |  |
| 7905283 | NM_003568    | ANXA9       | annexin A9                          | -0.071 | 0.952 | 4.67E-01 | 4.67E+01 |  |  |
| 7905299 | NM_021222    | PRUNE       | prune homolog (Drosophila)          | -0.109 | 0.927 | 5.04E-01 | 5.04E+01 |  |  |
| 7905308 | NM_00115964  | BNIP1       | BCL2/adenovirus E1B 19kD intera     | -0.034 | 0.977 | 7.90E-01 | 7.90E+01 |  |  |
| 7905324 | BC002469     | C1orf56     | chromosome 1 open reading fram      | -0.043 | 0.970 | 6.05E-01 | 6.05E+01 |  |  |
| 7905329 | NM_006818    | MLLT11      | myeloid/lymphoid or mixed-lineag    | 0.019  | 1.013 | 9.57E-01 | 9.57E+01 |  |  |
| 7905339 | NM_144618    | GABPB2      | GA binding protein transcription f  | -0.047 | 0.968 | 8.13E-01 | 8.13E+01 |  |  |
| 7905349 | NM_024575    | TNFAIP8L2   | tumor necrosis factor, alpha-induc  | 0.068  | 1.048 | 6.36E-01 | 6.36E+01 |  |  |
| 7905355 | NM_024041    | SCNM1       | sodium channel modifier 1           | 0.039  | 1.028 | 8.04E-01 | 8.04E+01 |  |  |
| 7905365 | NM_00113563  | PIP5K1A     | phosphatidylinositol-4-phosphate    | -0.026 | 0.982 | 8.73E-01 | 8.73E+01 |  |  |
| 7905374 | NM_002810    | PSMD4       | proteasome (prosome, macropain      | 0.053  | 1.037 | 7.51E-01 | 7.51E+01 |  |  |

|         |              |          |                                                               |        |       |          |          |  |  |
|---------|--------------|----------|---------------------------------------------------------------|--------|-------|----------|----------|--|--|
| 7905382 | NM_020832    | ZNF687   | zinc finger protein 687                                       | 0.008  | 1.006 | 9.65E-01 | 9.65E+01 |  |  |
| 7905395 | NM_002796    | PSMB4    | proteasome (prosome, macropain)                               | -0.060 | 0.959 | 6.33E-01 | 6.33E+01 |  |  |
| 7905406 | NM_020770    | CGN      | cingulin                                                      | -0.042 | 0.971 | 6.20E-01 | 6.20E+01 |  |  |
| 7905444 | NM_030918    | SNX27    | sorting nexin family member 27                                | 0.105  | 1.075 | 4.62E-01 | 4.62E+01 |  |  |
| 7905483 | NM_178438    | LCE5A    | late cornified envelope 5A                                    | -0.058 | 0.961 | 5.17E-01 | 5.17E+01 |  |  |
| 7905490 | NM_178434    | LCE3C    | late cornified envelope 3C                                    | 0.040  | 1.028 | 8.71E-01 | 8.71E+01 |  |  |
| 7905492 | NM_178433    | LCE3B    | late cornified envelope 3B                                    | 0.009  | 1.006 | 9.59E-01 | 9.59E+01 |  |  |
| 7905500 | NM_178430    | LCE2D    | late cornified envelope 2D                                    | -0.065 | 0.956 | 6.00E-01 | 6.00E+01 |  |  |
| 7905505 | NM_014357    | LCE2B    | late cornified envelope 2B                                    | -0.036 | 0.975 | 7.76E-01 | 7.76E+01 |  |  |
| 7905507 | NM_178428    | LCE2A    | late cornified envelope 2A                                    | -0.023 | 0.984 | 8.53E-01 | 8.53E+01 |  |  |
| 7905510 | NM_178356    | LCE4A    | late cornified envelope 4A                                    | -0.027 | 0.981 | 8.79E-01 | 8.79E+01 |  |  |
| 7905512 | NM_00102467  | C1orf68  | chromosome 1 open reading frame                               | -0.013 | 0.991 | 9.41E-01 | 9.41E+01 |  |  |
| 7905517 | NM_178354    | LCE1F    | late cornified envelope 1F                                    | -0.071 | 0.952 | 4.15E-01 | 4.15E+01 |  |  |
| 7905519 | NM_178353    | LCE1E    | late cornified envelope 1E                                    | -0.021 | 0.986 | 8.98E-01 | 8.98E+01 |  |  |
| 7905523 | NM_178352    | LCE1D    | late cornified envelope 1D                                    | -0.054 | 0.963 | 6.44E-01 | 6.44E+01 |  |  |
| 7905528 | NM_178348    | LCE1A    | late cornified envelope 1A                                    | -0.040 | 0.972 | 6.91E-01 | 6.91E+01 |  |  |
| 7905536 | NM_173080    | SPRR4    | small proline-rich protein 4                                  | -0.085 | 0.943 | 3.79E-01 | 3.79E+01 |  |  |
| 7905544 | NM_005987    | SPRR1A   | small proline-rich protein 1A                                 | -0.066 | 0.956 | 5.79E-01 | 5.79E+01 |  |  |
| 7905548 | NM_005416    | SPRR3    | small proline-rich protein 3                                  | 0.004  | 1.003 | 9.81E-01 | 9.81E+01 |  |  |
| 7905553 | NM_003125    | SPRR1B   | small proline-rich protein 1B (cornified)                     | 0.035  | 1.024 | 7.87E-01 | 7.87E+01 |  |  |
| 7905559 | NM_00101085  | LELP1    | late cornified envelope-like protein 1                        | -0.005 | 0.996 | 9.77E-01 | 9.77E+01 |  |  |
| 7905571 | NM_002965    | S100A9   | S100 calcium binding protein A9                               | -0.294 | 0.816 | 4.49E-01 | 4.49E+01 |  |  |
| 7905581 | NM_006271    | S100A1   | S100 calcium binding protein A1                               | -0.065 | 0.956 | 7.33E-01 | 7.33E+01 |  |  |
| 7905589 | ENST00000368 | C1orf77  | chromosome 1 open reading frame                               | -0.059 | 0.960 | 5.52E-01 | 5.52E+01 |  |  |
| 7905598 | NM_012437    | SNAPIN   | SNAP-associated protein                                       | 0.041  | 1.029 | 8.32E-01 | 8.32E+01 |  |  |
| 7905631 | NM_023015    | INTS3    | integrator complex subunit 3                                  | 0.038  | 1.027 | 7.97E-01 | 7.97E+01 |  |  |
| 7905664 | NM_024330    | SLC27A3  | solute carrier family 27 (fatty acid transporters)            | 0.041  | 1.029 | 7.97E-01 | 7.97E+01 |  |  |
| 7905677 | NM_130898    | CREB3L4  | cAMP responsive element binding protein 3-like 4              | 0.054  | 1.038 | 6.27E-01 | 6.27E+01 |  |  |
| 7905691 | NM_001030    | RPS27    | ribosomal protein S27                                         | -0.026 | 0.982 | 8.85E-01 | 8.85E+01 |  |  |
| 7905700 | NM_014847    | UBAP2L   | ubiquitin associated protein 2-like                           | 0.039  | 1.027 | 6.70E-01 | 6.70E+01 |  |  |
| 7905733 | NM_006118    | HAX1     | HCLS1 associated protein X-1                                  | 0.000  | 1.000 | 1.00E+00 | 1.00E+02 |  |  |
| 7905754 | NM_020452    | ATP8B2   | ATPase, class I, type 8B, member 2                            | -0.050 | 0.966 | 7.52E-01 | 7.52E+01 |  |  |
| 7905789 | NM_000565    | IL6R     | interleukin 6 receptor                                        | 0.139  | 1.101 | 1.40E-01 | 1.40E+01 |  |  |
| 7905817 | NM_000748    | CHRNB2   | cholinergic receptor, nicotinic, beta 2                       | 0.003  | 1.002 | 9.86E-01 | 9.86E+01 |  |  |
| 7905826 | NR_024163    | CKS1B    | CDC28 protein kinase regulatory subunit 1B                    | 0.092  | 1.066 | 5.72E-01 | 5.72E+01 |  |  |
| 7905831 | NM_025207    | FLAD1    | FAD1 flavin adenine dinucleotide dependent oxidoreductase     | 0.016  | 1.011 | 9.27E-01 | 9.27E+01 |  |  |
| 7905848 | NM_018655    | LENEP    | lens epithelial protein                                       | -0.008 | 0.994 | 9.67E-01 | 9.67E+01 |  |  |
| 7905854 | NM_015872    | ZBTB7B   | zinc finger and BTB domain containing 7B                      | 0.068  | 1.048 | 5.25E-01 | 5.25E+01 |  |  |
| 7905862 | NM_152494    | DCST1    | DC-STAMP domain containing 1                                  | -0.010 | 0.993 | 9.61E-01 | 9.61E+01 |  |  |
| 7905881 | NM_207196    | ADAM15   | ADAM metalloproteinase domain 15                              | -0.055 | 0.962 | 5.10E-01 | 5.10E+01 |  |  |
| 7905938 | NM_018845    | RAG1AP1  | recombination activating gene 1 associated protein 1          | 0.128  | 1.093 | 3.04E-01 | 3.04E+01 |  |  |
| 7905951 | NM_025058    | TRIM46   | tripartite motif-containing 46                                | -0.008 | 0.994 | 9.56E-01 | 9.56E+01 |  |  |
| 7905968 | NM_002455    | MTX1     | metaxin 1                                                     | 0.052  | 1.037 | 7.40E-01 | 7.40E+01 |  |  |
| 7905974 | NM_020897    | HCN3     | hyperpolarization activated cyclic nucleotide-gated channel 3 | 0.000  | 1.000 | 1.00E+00 | 1.00E+02 |  |  |
| 7905986 | NM_002004    | FDPS     | farnesyl diphosphate synthase (farnesyl transferase)          | -0.066 | 0.956 | 6.75E-01 | 6.75E+01 |  |  |
| 7905999 | NM_00110520  | RUSC1    | RUN and SH3 domain containing 1                               | -0.038 | 0.974 | 7.59E-01 | 7.59E+01 |  |  |
| 7906015 | ---          | ---      | ---                                                           | 0.298  | 1.230 | 1.16E-01 | 1.16E+01 |  |  |
| 7906017 | AF268613     | POU5F1P4 | POU class 5 homeobox 1 pseudogene                             | 0.002  | 1.001 | 9.94E-01 | 9.94E+01 |  |  |
| 7906021 | NM_018116    | MSTO1    | misato homolog 1 (Drosophila)                                 | -0.023 | 0.984 | 9.03E-01 | 9.03E+01 |  |  |
| 7906041 | NM_033657    | DAP3     | death associated protein 3                                    | 0.010  | 1.007 | 9.62E-01 | 9.62E+01 |  |  |
| 7906056 | NR_024117    | MSTO2P   | misato homolog 2 pseudogene                                   | 0.005  | 1.003 | 9.86E-01 | 9.86E+01 |  |  |
| 7906061 | NM_152280    | SYT11    | synaptotagmin XI                                              | -0.087 | 0.942 | 7.00E-01 | 7.00E+01 |  |  |
| 7906069 | NM_181885    | RXFP4    | relaxin/insulin-like family peptide                           | 0.017  | 1.012 | 9.19E-01 | 9.19E+01 |  |  |
| 7906072 | NM_014017    | ROBLD3   | roadblock domain containing 3                                 | 0.107  | 1.077 | 5.35E-01 | 5.35E+01 |  |  |
| 7906085 | NM_170707    | LMNA     | lamin A/C                                                     | 0.059  | 1.042 | 6.70E-01 | 6.70E+01 |  |  |
| 7906107 | NM_022367    | SEMA4A   | sema domain, immunoglobulin domain                            | 0.152  | 1.111 | 5.09E-01 | 5.09E+01 |  |  |
| 7906128 | NM_014655    | SLC25A44 | solute carrier family 25, member 44                           | 0.020  | 1.014 | 9.44E-01 | 9.44E+01 |  |  |
| 7906133 | NM_007221    | PMF1     | polyamine-modulated factor 1                                  | -0.022 | 0.985 | 8.72E-01 | 8.72E+01 |  |  |
| 7906140 | NM_199173    | BGLAP    | bone gamma-carboxyglutamate (gamma-carboxy) protein           | -0.016 | 0.989 | 9.40E-01 | 9.40E+01 |  |  |
| 7906146 | NR_026678    | TMEM79   | transmembrane protein 79                                      | -0.053 | 0.964 | 5.90E-01 | 5.90E+01 |  |  |
| 7906163 | NR_026549    | RHBG     | Rh family, B glycoprotein (gene/protein)                      | -0.041 | 0.972 | 7.28E-01 | 7.28E+01 |  |  |
| 7906177 | NM_00110566  | TTC24    | tetratricopeptide repeat domain 24                            | -0.100 | 0.933 | 2.00E-01 | 2.00E+01 |  |  |
| 7906185 | NM_144772    | APOA1BP  | apolipoprotein A-I binding protein                            | -0.012 | 0.992 | 9.64E-01 | 9.64E+01 |  |  |
| 7906194 | AK055377     | GPATCH4  | G patch domain containing 4                                   | -0.058 | 0.961 | 7.80E-01 | 7.80E+01 |  |  |
| 7906197 | NM_021817    | HAPLN2   | hyaluronan and proteoglycan link protein 2                    | -0.058 | 0.961 | 4.32E-01 | 4.32E+01 |  |  |
| 7906205 | NM_021948    | BCAN     | brevican                                                      | 0.004  | 1.003 | 9.86E-01 | 9.86E+01 |  |  |
| 7906223 | NM_015997    | C1orf66  | chromosome 1 open reading frame                               | 0.049  | 1.034 | 6.57E-01 | 6.57E+01 |  |  |
| 7906235 | NM_005973    | PRCC     | papillary renal cell carcinoma (transcript)                   | -0.013 | 0.991 | 9.36E-01 | 9.36E+01 |  |  |
| 7906244 | NM_00100779  | NTRK1    | neurotrophic tyrosine kinase, receptor type 1                 | -0.022 | 0.985 | 7.91E-01 | 7.91E+01 |  |  |
| 7906264 | NM_00108047  | PEAR1    | platelet endothelial aggregation receptor 1                   | 0.002  | 1.001 | 9.94E-01 | 9.94E+01 |  |  |
| 7906284 | NM_144702    | C1orf92  | chromosome 1 open reading frame                               | -0.020 | 0.986 | 8.84E-01 | 8.84E+01 |  |  |
| 7906303 | ---          | ---      | ---                                                           | 0.108  | 1.078 | 4.20E-01 | 4.20E+01 |  |  |
| 7906305 | ---          | ---      | ---                                                           | 0.031  | 1.022 | 9.43E-01 | 9.43E+01 |  |  |
| 7906307 | NM_018240    | KIRREL   | kin of IRRE like (Drosophila)                                 | 0.004  | 1.003 | 9.83E-01 | 9.83E+01 |  |  |
| 7906330 | NM_001766    | CD1D     | CD1d molecule                                                 | 0.032  | 1.023 | 7.30E-01 | 7.30E+01 |  |  |
| 7906348 | NM_001765    | CD1C     | CD1c molecule                                                 | 0.344  | 1.269 | 2.22E-01 | 2.22E+01 |  |  |
| 7906386 | NM_152501    | PYHIN1   | pyrin and HIN domain family, member 1                         | 0.142  | 1.104 | 6.57E-01 | 6.57E+01 |  |  |

|         |             |              |                                        |        |       |          |          |  |  |
|---------|-------------|--------------|----------------------------------------|--------|-------|----------|----------|--|--|
| 7906400 | NM_005531   | IFI16        | interferon, gamma-inducible prote      | 0.134  | 1.097 | 7.91E-02 | 7.91E+00 |  |  |
| 7906417 | NM_021189   | CADM3        | cell adhesion molecule 3               | -0.041 | 0.972 | 7.89E-01 | 7.89E+01 |  |  |
| 7906433 | ---         | ---          | ---                                    | -0.021 | 0.986 | 9.53E-01 | 9.53E+01 |  |  |
| 7906435 | NM_002036   | DARC         | Duffy blood group, chemokine rec       | 0.007  | 1.005 | 9.66E-01 | 9.66E+01 |  |  |
| 7906467 | ---         | ---          | ---                                    | -0.041 | 0.972 | 7.92E-01 | 7.92E+01 |  |  |
| 7906469 | NM_017823   | DUSP23       | dual specificity phosphatase 23        | 0.081  | 1.058 | 3.24E-01 | 3.24E+01 |  |  |
| 7906475 | NM_00100431 | FCRL6        | Fc receptor-like 6                     | 0.059  | 1.042 | 8.69E-01 | 8.69E+01 |  |  |
| 7906496 | NM_004983   | KCNJ9        | potassium inwardly-rectifying cha      | -0.029 | 0.980 | 8.61E-01 | 8.61E+01 |  |  |
| 7906552 | NM_001231   | CASQ1        | calsequestrin 1 (fast-twitch, skelet   | -0.005 | 0.997 | 9.85E-01 | 9.85E+01 |  |  |
| 7906576 | NM_015331   | NCSTN        | nicastrin                              | 0.140  | 1.102 | 2.14E-01 | 2.14E+01 |  |  |
| 7906613 | NM_021181   | SLAMF7       | SLAM family member 7                   | 0.248  | 1.187 | 6.05E-01 | 6.05E+01 |  |  |
| 7906622 | NM_002348   | LY9          | lymphocyte antigen 9                   | 0.061  | 1.043 | 7.07E-01 | 7.07E+01 |  |  |
| 7906652 | NM_005600   | NIT1         | nitrilase 1                            | 0.016  | 1.011 | 9.53E-01 | 9.53E+01 |  |  |
| 7906662 | NM_016406   | UFC1         | ubiquitin-fold modifier conjugatin     | 0.005  | 1.003 | 9.80E-01 | 9.80E+01 |  |  |
| 7906671 | NM_00101444 | USP21        | ubiquitin specific peptidase 21        | -0.019 | 0.987 | 9.16E-01 | 9.16E+01 |  |  |
| 7906703 | NM_004550   | NDUFS2       | NADH dehydrogenase (ubiquinone         | 0.021  | 1.015 | 8.96E-01 | 8.96E+01 |  |  |
| 7906720 | NM_004106   | FCER1G       | Fc fragment of IgE, high affinity I, h | 0.154  | 1.113 | 7.62E-01 | 7.62E+01 |  |  |
| 7906728 | NM_032174   | TOMM40L      | translocase of outer mitochondria      | -0.024 | 0.984 | 8.62E-01 | 8.62E+01 |  |  |
| 7906742 | NM_00110256 | PCP4L1       | Purkinje cell protein 4 like 1         | -0.049 | 0.967 | 7.10E-01 | 7.10E+01 |  |  |
| 7906746 | NM_003001   | SDHC         | succinate dehydrogenase complex        | 0.002  | 1.001 | 9.95E-01 | 9.95E+01 |  |  |
| 7906753 | ---         | ---          | ---                                    | 0.022  | 1.015 | 9.64E-01 | 9.64E+01 |  |  |
| 7906757 | NM_00113621 | FCGR2A       | Fc fragment of IgG, low affinity IIa   | 0.386  | 1.307 | 5.44E-01 | 5.44E+01 |  |  |
| 7906764 | NM_002155   | HSPA6        | heat shock 70kDa protein 6 (HSP7       | -0.206 | 0.867 | 1.56E-01 | 1.56E+01 |  |  |
| 7906767 | NM_001563   | FCGR2C       | Fc fragment of IgG, low affinity IIc   | 0.391  | 1.311 | 2.57E-01 | 2.57E+01 |  |  |
| 7906775 | NR_024151   | HSPA7        | heat shock 70kDa protein 7 (HSP7       | -0.113 | 0.925 | 6.44E-01 | 6.44E+01 |  |  |
| 7906777 | NM_004001   | FCGR2B       | Fc fragment of IgG, low affinity IIb   | 0.231  | 1.174 | 2.74E-01 | 2.74E+01 |  |  |
| 7906786 | NM_032738   | FCRLA        | Fc receptor-like A                     | 0.138  | 1.100 | 4.60E-01 | 4.60E+01 |  |  |
| 7906797 | NM_00100290 | FCRLB        | Fc receptor-like B                     | 0.015  | 1.011 | 9.40E-01 | 9.40E+01 |  |  |
| 7906810 | NM_007240   | DUSP12       | dual specificity phosphatase 12        | -0.070 | 0.953 | 5.20E-01 | 5.20E+01 |  |  |
| 7906819 | NM_007348   | ATF6         | activating transcription factor 6      | 0.044  | 1.031 | 8.30E-01 | 8.30E+01 |  |  |
| 7906838 | NM_014697   | NOS1AP       | nitric oxide synthase 1 (neuronal)     | -0.079 | 0.947 | 3.09E-01 | 3.09E+01 |  |  |
| 7906852 | NM_0175866  | UHMK1        | U2AF homology motif (UHM) kina         | -0.018 | 0.988 | 9.06E-01 | 9.06E+01 |  |  |
| 7906863 | NM_003115   | UAP1         | UDP-N-acetylglucosamine pyroph         | -0.071 | 0.952 | 6.66E-01 | 6.66E+01 |  |  |
| 7906898 | ---         | ---          | ---                                    | -0.006 | 0.996 | 9.82E-01 | 9.82E+01 |  |  |
| 7906904 | NM_016371   | HSD17B7      | hydroxysteroid (17-beta) dehydro       | 0.007  | 1.005 | 9.84E-01 | 9.84E+01 |  |  |
| 7906948 | ---         | ---          | ---                                    | 0.048  | 1.034 | 9.24E-01 | 9.24E+01 |  |  |
| 7906954 | NM_002585   | PBX1         | pre-B-cell leukemia homeobox 1         | 0.030  | 1.021 | 8.41E-01 | 8.41E+01 |  |  |
| 7906969 | ---         | ---          | ---                                    | 0.010  | 1.007 | 9.70E-01 | 9.70E+01 |  |  |
| 7906978 | NM_004528   | MGST3        | microsomal glutathione S-transfer      | -0.035 | 0.976 | 9.19E-01 | 9.19E+01 |  |  |
| 7906993 | ---         | ---          | ---                                    | 0.047  | 1.033 | 7.08E-01 | 7.08E+01 |  |  |
| 7906995 | NM_012474   | UCK2         | uridine-cytidine kinase 2              | -0.010 | 0.993 | 9.65E-01 | 9.65E+01 |  |  |
| 7907008 | ---         | ---          | ---                                    | -0.068 | 0.954 | 6.91E-01 | 6.91E+01 |  |  |
| 7907010 | ---         | ---          | ---                                    | -0.107 | 0.929 | 6.44E-01 | 6.44E+01 |  |  |
| 7907024 | NM_017542   | POGK         | pogo transposable element with K       | 0.087  | 1.062 | 5.26E-01 | 5.26E+01 |  |  |
| 7907049 | ---         | ---          | ---                                    | 0.037  | 1.026 | 8.23E-01 | 8.23E+01 |  |  |
| 7907058 | NM_002697   | POU2F1       | POU class 2 homeobox 1                 | 0.019  | 1.013 | 8.81E-01 | 8.81E+01 |  |  |
| 7907079 | NM_052862   | RCSO1        | RCSO domain containing 1               | 0.131  | 1.095 | 1.63E-01 | 1.63E+01 |  |  |
| 7907090 | AY194294    | LOC100128751 | INM04                                  | 0.246  | 1.186 | 1.52E-02 | 1.52E+00 |  |  |
| 7907104 | NM_018442   | DCAF6        | DDO1 and CUL4 associated factor        | -0.092 | 0.939 | 2.37E-01 | 2.37E+01 |  |  |
| 7907124 | NM_0152902  | TIPRL        | TIP41, TOR signaling pathway regu      | -0.011 | 0.992 | 9.35E-01 | 9.35E+01 |  |  |
| 7907135 | NM_0199344  | SFT2D2       | SFT2 domain containing 2               | 0.195  | 1.145 | 1.72E-01 | 1.72E+01 |  |  |
| 7907146 | NM_005149   | TBX19        | T-box 19                               | 0.034  | 1.024 | 8.05E-01 | 8.05E+01 |  |  |
| 7907211 | ---         | ---          | ---                                    | 0.018  | 1.013 | 9.20E-01 | 9.20E+01 |  |  |
| 7907213 | NM_0152281  | GORAB        | golgin, RAB6-interacting               | 0.004  | 1.003 | 9.87E-01 | 9.87E+01 |  |  |
| 7907310 | NM_015172   | BAT2D1       | BAT2 domain containing 1               | -0.086 | 0.942 | 1.16E-01 | 1.16E+01 |  |  |
| 7907349 | ---         | ---          | ---                                    | 0.048  | 1.033 | 8.78E-01 | 8.78E+01 |  |  |
| 7907351 | ---         | ---          | ---                                    | 0.019  | 1.013 | 9.25E-01 | 9.25E+01 |  |  |
| 7907353 | NM_015935   | METTL13      | methyltransferase like 13              | -0.097 | 0.935 | 5.79E-01 | 5.79E+01 |  |  |
| 7907368 | ---         | ---          | ---                                    | -0.046 | 0.969 | 8.98E-01 | 8.98E+01 |  |  |
| 7907370 | NM_015569   | DNM3         | dynammin 3                             | -0.112 | 0.925 | 4.87E-01 | 4.87E+01 |  |  |
| 7907404 | NM_014283   | C1orf9       | chromosome 1 open reading fram         | -0.049 | 0.967 | 7.45E-01 | 7.45E+01 |  |  |
| 7907430 | NM_000639   | FASLG        | Fas ligand (TNF superfamily, mem       | -0.050 | 0.966 | 8.83E-01 | 8.83E+01 |  |  |
| 7907439 | NM_004905   | PRDX6        | peroxiredoxin 6                        | -0.103 | 0.931 | 3.10E-01 | 3.10E+01 |  |  |
| 7907445 | NM_014458   | KLHL20       | kelch-like 20 (Drosophila)             | -0.041 | 0.972 | 7.89E-01 | 7.89E+01 |  |  |
| 7907464 | ---         | ---          | ---                                    | -0.033 | 0.978 | 9.19E-01 | 9.19E+01 |  |  |
| 7907466 | NM_018122   | DARS2        | aspartyl-tRNA synthetase 2, mitoc      | 0.001  | 1.000 | 9.98E-01 | 9.98E+01 |  |  |
| 7907486 | NM_032522   | ZBTB37       | zinc finger and BTB domain contai      | 0.086  | 1.062 | 5.71E-01 | 5.71E+01 |  |  |
| 7907492 | NM_014857   | RABGAP1L     | RAB GTPase activating protein 1-li     | 0.030  | 1.021 | 8.51E-01 | 8.51E+01 |  |  |
| 7907531 | NM_005684   | GPR52        | G protein-coupled receptor 52          | 0.130  | 1.094 | 4.43E-01 | 4.43E+01 |  |  |
| 7907537 | NM_014412   | CACYBP       | calyculin binding protein              | -0.070 | 0.953 | 4.17E-01 | 4.17E+01 |  |  |
| 7907601 | NM_021165   | FAM5B        | family with sequence similarity 5,     | -0.059 | 0.960 | 7.35E-01 | 7.35E+01 |  |  |
| 7907611 | NM_0170692  | RASAL2       | RAS protein activator like 2           | 0.308  | 1.238 | 2.17E-01 | 2.17E+01 |  |  |
| 7907655 | ---         | ---          | ---                                    | -0.040 | 0.973 | 9.22E-01 | 9.22E+01 |  |  |
| 7907680 | NM_014864   | FAM20B       | family with sequence similarity 20     | -0.086 | 0.942 | 3.73E-01 | 3.73E+01 |  |  |
| 7907690 | NM_022371   | TOR3A        | torsin family 3, member A              | 0.004  | 1.003 | 9.85E-01 | 9.85E+01 |  |  |
| 7907700 | ---         | ---          | ---                                    | 0.028  | 1.020 | 9.45E-01 | 9.45E+01 |  |  |
| 7907702 | NM_003101   | SOAT1        | sterol O-acyltransferase 1             | 0.173  | 1.127 | 2.41E-01 | 2.41E+01 |  |  |

|         |             |           |                                     |        |       |          |          |  |  |
|---------|-------------|-----------|-------------------------------------|--------|-------|----------|----------|--|--|
| 7907773 | NM_015602   | TOR1AIP1  | torsin A interacting protein 1      | 0.058  | 1.041 | 6.39E-01 | 6.39E+01 |  |  |
| 7907788 | ---         | ---       | ---                                 | 0.033  | 1.023 | 9.47E-01 | 9.47E+01 |  |  |
| 7907790 | NM_014810   | CEP350    | centrosomal protein 350kDa          | -0.061 | 0.959 | 5.54E-01 | 5.54E+01 |  |  |
| 7907830 | NM_002826   | QSOX1     | quiescin Q6 sulfhydryl oxidase 1    | -0.079 | 0.947 | 6.22E-01 | 6.22E+01 |  |  |
| 7907847 | ---         | ---       | ---                                 | -0.126 | 0.916 | 2.29E-01 | 2.29E+01 |  |  |
| 7907849 | NM_033343   | LHX4      | UM homeobox 4                       | 0.041  | 1.029 | 7.63E-01 | 7.63E+01 |  |  |
| 7907859 | ---         | ---       | ---                                 | 0.160  | 1.117 | 2.10E-01 | 2.10E+01 |  |  |
| 7907861 | NM_004736   | XPR1      | xenotropic and polytropic retrovir  | -0.024 | 0.984 | 8.93E-01 | 8.93E+01 |  |  |
| 7907882 | NM_020950   | KIAA1614  | KIAA1614                            | -0.085 | 0.943 | 1.96E-01 | 1.96E+01 |  |  |
| 7907904 | NM_016545   | IER5      | immediate early response 5          | -0.056 | 0.962 | 6.87E-01 | 6.87E+01 |  |  |
| 7907911 | NM_000721   | CACNA1E   | calcium channel, voltage-depende    | -0.103 | 0.931 | 5.23E-01 | 5.23E+01 |  |  |
| 7907962 | ---         | ---       | ---                                 | -0.018 | 0.988 | 9.24E-01 | 9.24E+01 |  |  |
| 7907966 | ---         | ---       | ---                                 | -0.009 | 0.994 | 9.80E-01 | 9.80E+01 |  |  |
| 7907968 | ---         | ---       | ---                                 | -0.043 | 0.971 | 6.57E-01 | 6.57E+01 |  |  |
| 7907970 | ---         | ---       | ---                                 | -0.010 | 0.993 | 9.76E-01 | 9.76E+01 |  |  |
| 7908022 | NM_001357   | DHX9      | DEAH (Asp-Glu-Ala-His) box polype   | -0.047 | 0.968 | 7.45E-01 | 7.45E+01 |  |  |
| 7908041 | NM_002293   | LAMC1     | laminin, gamma 1 (formerly LAMB     | -0.087 | 0.941 | 7.52E-01 | 7.52E+01 |  |  |
| 7908097 | NM_173156   | SMG7      | Smg-7 homolog, nonsense mediat      | 0.043  | 1.030 | 7.29E-01 | 7.29E+01 |  |  |
| 7908147 | NR_023349   | TSEN15    | tRNA splicing endonuclease 15 ho    | 0.013  | 1.009 | 9.56E-01 | 9.56E+01 |  |  |
| 7908157 | ---         | ---       | ---                                 | -0.047 | 0.968 | 6.84E-01 | 6.84E+01 |  |  |
| 7908169 | NM_007212   | RNF2      | ring finger protein 2               | 0.021  | 1.014 | 9.12E-01 | 9.12E+01 |  |  |
| 7908328 | ---         | ---       | ---                                 | -0.141 | 0.907 | 4.36E-01 | 4.36E+01 |  |  |
| 7908330 | AY854248    | C1orf27   | chromosome 1 open reading fram      | 0.071  | 1.050 | 7.19E-01 | 7.19E+01 |  |  |
| 7908347 | NM_022375   | OCLM      | oculomedin                          | 0.127  | 1.092 | 5.52E-01 | 5.52E+01 |  |  |
| 7908376 | NM_130782   | RGS18     | regulator of G-protein signaling 18 | 0.461  | 1.377 | 1.73E-01 | 1.73E+01 |  |  |
| 7908407 | NM_002954   | RPS27A    | ribosomal protein S27a              | 0.008  | 1.006 | 9.35E-01 | 9.35E+01 |  |  |
| 7908421 | NM_004600   | TROVE2    | TROVE domain family, member 2       | -0.055 | 0.963 | 6.92E-01 | 6.92E+01 |  |  |
| 7908437 | NM_024529   | CDC73     | cell division cycle 73, Paf1/RNA po | -0.006 | 0.996 | 9.66E-01 | 9.66E+01 |  |  |
| 7908543 | NM_133494   | NEK7      | NIMA (never in mitosis gene a)-rel  | 0.059  | 1.042 | 7.03E-01 | 7.03E+01 |  |  |
| 7908553 | NM_002838   | PTPRC     | protein tyrosine phosphatase, rec   | 0.023  | 1.016 | 8.08E-01 | 8.08E+01 |  |  |
| 7908591 | ---         | ---       | ---                                 | -0.014 | 0.990 | 9.53E-01 | 9.53E+01 |  |  |
| 7908612 | NM_00110551 | FAM58B    | family with sequence similarity 58  | 0.065  | 1.046 | 6.69E-01 | 6.69E+01 |  |  |
| 7908635 | ---         | ---       | ---                                 | 0.017  | 1.012 | 9.20E-01 | 9.20E+01 |  |  |
| 7908637 | NM_005298   | GPR25     | G protein-coupled receptor 25       | 0.022  | 1.016 | 8.78E-01 | 8.78E+01 |  |  |
| 7908639 | NM_018265   | C1orf106  | chromosome 1 open reading fram      | 0.039  | 1.028 | 7.99E-01 | 7.99E+01 |  |  |
| 7908650 | NM_178275   | IGFN1     | immunoglobulin-like and fibronect   | -0.028 | 0.981 | 8.70E-01 | 8.70E+01 |  |  |
| 7908692 | NR_026667   | RPS10P7   | ribosomal protein S10 pseudogen     | -0.038 | 0.974 | 8.37E-01 | 8.37E+01 |  |  |
| 7908694 | NM_020443   | NAV1      | neuron navigator 1                  | -0.145 | 0.904 | 3.16E-01 | 3.16E+01 |  |  |
| 7908732 | NM_018085   | IPO9      | importin 9                          | 0.029  | 1.021 | 8.47E-01 | 8.47E+01 |  |  |
| 7908758 | NM_198149   | SHISA4    | shisa homolog 4 (Xenopus laevis)    | 0.017  | 1.012 | 9.11E-01 | 9.11E+01 |  |  |
| 7908766 | NM_006335   | TIMM17A   | translocase of inner mitochondrial  | 0.058  | 1.041 | 6.90E-01 | 6.90E+01 |  |  |
| 7908777 | ---         | ---       | ---                                 | -0.030 | 0.980 | 9.00E-01 | 9.00E+01 |  |  |
| 7908779 | NM_020216   | RNPEP     | arginyl aminopeptidase (aminopep    | 0.042  | 1.029 | 8.27E-01 | 8.27E+01 |  |  |
| 7908812 | NM_004767   | GPR37L1   | G protein-coupled receptor 37 like  | -0.056 | 0.962 | 5.31E-01 | 5.31E+01 |  |  |
| 7908841 | NM_032105   | PPP1R12B  | protein phosphatase 1, regulatory   | -0.037 | 0.975 | 8.15E-01 | 8.15E+01 |  |  |
| 7908861 | AF314543    | OCR1      | ovarian cancer-related protein 1    | -0.043 | 0.971 | 9.19E-01 | 9.19E+01 |  |  |
| 7908867 | NM_138391   | TMEM183A  | transmembrane protein 183A          | -0.004 | 0.997 | 9.86E-01 | 9.86E+01 |  |  |
| 7908879 | NM_015053   | PPFIA4    | protein tyrosine phosphatase, rec   | -0.069 | 0.953 | 2.31E-01 | 2.31E+01 |  |  |
| 7908907 | NM_000674   | ADORA1    | adenosine A1 receptor               | -0.019 | 0.987 | 9.00E-01 | 9.00E+01 |  |  |
| 7908917 | NM_006763   | BTG2      | BTG family, member 2                | -0.081 | 0.946 | 4.16E-01 | 4.16E+01 |  |  |
| 7908924 | NM_002725   | PRELP     | proline/arginine-rich end leucine-  | -0.085 | 0.943 | 4.43E-01 | 4.43E+01 |  |  |
| 7908940 | NM_00100139 | ATP2B4    | ATPase, Ca++ transporting, plasma   | -0.144 | 0.905 | 3.70E-01 | 3.70E+01 |  |  |
| 7908966 | BC000988    | C1orf217  | chromosome 1 open reading fram      | 0.012  | 1.008 | 9.79E-01 | 9.79E+01 |  |  |
| 7908968 | NM_017773   | LAX1      | lymphocyte transmembrane adap       | -0.051 | 0.966 | 8.49E-01 | 8.49E+01 |  |  |
| 7908978 | NM_014827   | ZC3H11A   | zinc finger CCCH-type containing 1  | -0.024 | 0.983 | 8.84E-01 | 8.84E+01 |  |  |
| 7908988 | NM_003094   | SNRPE     | small nuclear ribonucleoprotein p   | -0.145 | 0.904 | 3.35E-01 | 3.35E+01 |  |  |
| 7908993 | NM_005686   | SOX13     | SRY (sex determining region Y)-bo   | 0.031  | 1.022 | 8.13E-01 | 8.13E+01 |  |  |
| 7909011 | NM_002393   | MDM4      | Mdm4 p53 binding protein homol      | 0.106  | 1.077 | 1.85E-01 | 1.85E+01 |  |  |
| 7909027 | NM_00100538 | NFASC     | neurofascin homolog (chicken)       | 0.029  | 1.020 | 7.67E-01 | 7.67E+01 |  |  |
| 7909064 | NM_005076   | CNTN2     | contactin 2 (axonal)                | -0.002 | 0.998 | 9.90E-01 | 9.90E+01 |  |  |
| 7909102 | ---         | ---       | ---                                 | 0.016  | 1.011 | 9.49E-01 | 9.49E+01 |  |  |
| 7909104 | NM_212503   | PCTK3     | PCTAIRE protein kinase 3            | -0.083 | 0.944 | 5.34E-01 | 5.34E+01 |  |  |
| 7909127 | NM_181644   | MFSD4     | major facilitator superfamily doma  | -0.037 | 0.974 | 7.54E-01 | 7.54E+01 |  |  |
| 7909140 | ---         | ---       | ---                                 | 0.235  | 1.177 | 5.25E-01 | 5.25E+01 |  |  |
| 7909142 | NM_022731   | NUCKS1    | nuclear casein kinase and cyclin-d  | 0.134  | 1.098 | 1.55E-01 | 1.55E+01 |  |  |
| 7909144 | AK094426    | LOC284581 | hypothetical protein LOC284581      | -0.031 | 0.979 | 8.48E-01 | 8.48E+01 |  |  |
| 7909175 | NM_015326   | SRGAP2    | SLIT-ROBO Rho GTPase activating     | 0.257  | 1.195 | 1.01E-01 | 1.01E+01 |  |  |
| 7909188 | NM_014002   | IKBKE     | inhibitor of kappa light polypeptid | -0.056 | 0.962 | 6.09E-01 | 6.09E+01 |  |  |
| 7909214 | NM_182663   | RASSF5    | Ras association (RalGDS/AF-6) dor   | -0.005 | 0.996 | 9.78E-01 | 9.78E+01 |  |  |
| 7909236 | NM_004759   | MAPKAPK2  | mitogen-activated protein kinase-   | -0.068 | 0.954 | 6.66E-01 | 6.66E+01 |  |  |
| 7909283 | ---         | ---       | ---                                 | -0.017 | 0.988 | 9.64E-01 | 9.64E+01 |  |  |
| 7909332 | NM_00111475 | CD55      | CD55 molecule, decay accelerating   | -0.121 | 0.919 | 2.25E-01 | 2.25E+01 |  |  |
| 7909400 | NM_002389   | CD46      | CD46 molecule, complement regu      | 0.034  | 1.024 | 7.78E-01 | 7.78E+01 |  |  |
| 7909418 | NR_026817   | LOC148696 | hypothetical LOC148696              | 0.014  | 1.009 | 9.63E-01 | 9.63E+01 |  |  |
| 7909441 | NM_015714   | G0S2      | G0/G1switch 2                       | -0.210 | 0.864 | 3.12E-01 | 3.12E+01 |  |  |
| 7909455 | NM_025228   | TRAF3IP3  | TRAF3 interacting protein 3         | 0.234  | 1.176 | 3.92E-02 | 3.92E+00 |  |  |
| 7909478 | NM_014388   | C1orf107  | chromosome 1 open reading fram      | 0.001  | 1.001 | 9.96E-01 | 9.96E+01 |  |  |



|         |             |                |                                                         |        |       |          |          |  |  |
|---------|-------------|----------------|---------------------------------------------------------|--------|-------|----------|----------|--|--|
| 7909510 | NM_018194   | HHAT           | hedgehog acyltransferase                                | 0.052  | 1.037 | 7.97E-01 | 7.97E+01 |  |  |
| 7909529 | NM_00113622 | RCOR3          | REST corepressor 3                                      | 0.066  | 1.047 | 5.52E-01 | 5.52E+01 |  |  |
| 7909545 | NM_145759   | TRAF5          | TNF receptor-associated factor 5                        | 0.067  | 1.048 | 6.88E-01 | 6.88E+01 |  |  |
| 7909561 | NR_026761   | C1orf97        | chromosome 1 open reading frame                         | 0.045  | 1.032 | 8.63E-01 | 8.63E+01 |  |  |
| 7909586 | NM_006243   | PPP2R5A        | protein phosphatase 2, regulatory subunit 5A            | 0.037  | 1.026 | 7.81E-01 | 7.81E+01 |  |  |
| 7909601 | NR_004389   | SNORA16B       | small nucleolar RNA, H/ACA box 1                        | 0.293  | 1.225 | 4.48E-01 | 4.48E+01 |  |  |
| 7909603 | NM_013349   | NENF           | neuron derived neurotrophic factor                      | 0.036  | 1.025 | 8.50E-01 | 8.50E+01 |  |  |
| 7909610 | NM_00104061 | ATF3           | activating transcription factor 3                       | 0.113  | 1.081 | 4.87E-01 | 4.87E+01 |  |  |
| 7909628 | NM_014053   | FLVCR1         | feline leukemia virus subgroup C receptor               | -0.005 | 0.996 | 9.86E-01 | 9.86E+01 |  |  |
| 7909642 | NM_024749   | VASH2          | vasohibin 2                                             | 0.082  | 1.059 | 2.30E-01 | 2.30E+01 |  |  |
| 7909661 | NM_012424   | RPS6KC1        | ribosomal protein S6 kinase, 52kDa                      | 0.094  | 1.067 | 5.52E-01 | 5.52E+01 |  |  |
| 7909689 | NM_020197   | SMYD2          | SET and MYND domain containing protein                  | -0.086 | 0.942 | 6.22E-01 | 6.22E+01 |  |  |
| 7909782 | NM_016052   | RRP15          | ribosomal RNA processing 15 homolog                     | 0.036  | 1.025 | 9.05E-01 | 9.05E+01 |  |  |
| 7909815 | NM_018060   | IARS2          | isoleucyl-tRNA synthetase 2, mitochondrial              | -0.042 | 0.971 | 7.38E-01 | 7.38E+01 |  |  |
| 7909862 | NM_024709   | C1orf115       | chromosome 1 open reading frame                         | -0.041 | 0.972 | 7.32E-01 | 7.32E+01 |  |  |
| 7909890 | NM_021958   | HLX            | H2.0-like homeobox                                      | -0.082 | 0.945 | 3.44E-01 | 3.44E+01 |  |  |
| 7909896 | ---         | ---            | ---                                                     | -0.057 | 0.961 | 5.81E-01 | 5.81E+01 |  |  |
| 7909898 | NM_198551   | MIA3           | melanoma inhibitory activity family 3                   | -0.021 | 0.986 | 8.78E-01 | 8.78E+01 |  |  |
| 7909931 | NM_144695   | C1orf58        | chromosome 1 open reading frame                         | -0.027 | 0.981 | 8.88E-01 | 8.88E+01 |  |  |
| 7909965 | NM_152610   | C1orf65        | chromosome 1 open reading frame                         | -0.033 | 0.977 | 7.94E-01 | 7.94E+01 |  |  |
| 7909967 | NM_001748   | CAPN2          | calpain 2, (mII) large subunit                          | 0.070  | 1.050 | 7.34E-01 | 7.34E+01 |  |  |
| 7909990 | AK290103    | LOC100287934   | similar to hCG2042721                                   | 0.036  | 1.025 | 9.29E-01 | 9.29E+01 |  |  |
| 7909992 | NM_015176   | FBXO28         | F-box protein 28                                        | 0.116  | 1.084 | 4.01E-01 | 4.01E+01 |  |  |
| 7910001 | NM_003676   | DEGS1          | degenerative spermatocyte homolog                       | 0.068  | 1.048 | 5.76E-01 | 5.76E+01 |  |  |
| 7910014 | NM_014184   | CNIH4          | cornichon homolog 4 (Drosophila)                        | -0.013 | 0.991 | 9.68E-01 | 9.68E+01 |  |  |
| 7910096 | ---         | ---            | ---                                                     | 0.030  | 1.021 | 9.01E-01 | 9.01E+01 |  |  |
| 7910099 | NM_00113044 | SRP9           | signal recognition particle 9kDa                        | 0.065  | 1.046 | 4.91E-01 | 4.91E+01 |  |  |
| 7910111 | NM_000120   | EPHX1          | epoxide hydrolase 1, microsomal                         | 0.069  | 1.049 | 6.38E-01 | 6.38E+01 |  |  |
| 7910124 | NM_002107   | H3F3A // H3F3A | H3 histone, family 3A // H3 histone                     | 0.100  | 1.072 | 1.59E-01 | 1.59E+01 |  |  |
| 7910134 | NM_031944   | MIXL1          | Mix1 homeobox-like 1 (Xenopus laevis)                   | -0.053 | 0.964 | 7.33E-01 | 7.33E+01 |  |  |
| 7910142 | NM_00100366 | C1orf95        | chromosome 1 open reading frame                         | -0.048 | 0.967 | 7.36E-01 | 7.36E+01 |  |  |
| 7910146 | NM_000447   | PSEN2          | presenilin 2 (Alzheimer disease 4)                      | 0.011  | 1.008 | 9.66E-01 | 9.66E+01 |  |  |
| 7910164 | NM_020247   | CABC1          | chaperone, ABC1 activity of bc1 complex                 | -0.075 | 0.949 | 3.33E-01 | 3.33E+01 |  |  |
| 7910198 | BC007286    | ZNF678         | zinc finger protein 678                                 | 0.035  | 1.025 | 8.93E-01 | 8.93E+01 |  |  |
| 7910200 | NM_053052   | SNAP47         | synaptosomal-associated protein, 47kDa                  | -0.019 | 0.987 | 8.78E-01 | 8.78E+01 |  |  |
| 7910217 | NM_033131   | WNT3A          | wingless-type MMTV integration site 3A                  | -0.068 | 0.954 | 3.39E-01 | 3.39E+01 |  |  |
| 7910229 | NM_00102422 | ARF1           | ADP-ribosylation factor 1                               | 0.046  | 1.033 | 7.64E-01 | 7.64E+01 |  |  |
| 7910241 | NM_000858   | GUK1           | guanylate kinase 1                                      | -0.001 | 1.000 | 9.98E-01 | 9.98E+01 |  |  |
| 7910257 | NM_020435   | GJC2           | gap junction protein, gamma 2, 47kDa                    | -0.076 | 0.949 | 3.95E-01 | 3.95E+01 |  |  |
| 7910261 | NM_00101086 | C1orf69        | chromosome 1 open reading frame                         | 0.010  | 1.007 | 9.61E-01 | 9.61E+01 |  |  |
| 7910265 | NM_00109862 | OBSCN          | obscurin, cytoskeletal calmodulin-binding protein       | -0.004 | 0.997 | 9.75E-01 | 9.75E+01 |  |  |
| 7910372 | NM_00101085 | RNF187         | ring finger protein 187                                 | 0.024  | 1.017 | 8.56E-01 | 8.56E+01 |  |  |
| 7910377 | ---         | ---            | ---                                                     | 0.006  | 1.004 | 9.93E-01 | 9.93E+01 |  |  |
| 7910385 | ---         | ---            | ---                                                     | -0.004 | 0.997 | 9.90E-01 | 9.90E+01 |  |  |
| 7910387 | NM_021205   | RHOU           | ras homolog gene family, member H                       | -0.052 | 0.964 | 8.96E-01 | 8.96E+01 |  |  |
| 7910398 | NM_004578   | RAB4A          | RAB4A, member RAS oncogene family                       | 0.142  | 1.104 | 3.16E-01 | 3.16E+01 |  |  |
| 7910414 | ---         | ---            | ---                                                     | 0.025  | 1.017 | 9.27E-01 | 9.27E+01 |  |  |
| 7910416 | NM_014777   | URB2           | URB2 ribosome biogenesis 2 homolog                      | -0.004 | 0.997 | 9.85E-01 | 9.85E+01 |  |  |
| 7910427 | NM_004481   | GALNT2         | UDP-N-acetyl-alpha-D-galactose 4-epimerase              | -0.124 | 0.917 | 2.21E-01 | 2.21E+01 |  |  |
| 7910446 | NM_007357   | COG2           | component of oligomeric golgi complex                   | -0.013 | 0.991 | 9.61E-01 | 9.61E+01 |  |  |
| 7910492 | ---         | ---            | ---                                                     | 0.037  | 1.026 | 9.02E-01 | 9.02E+01 |  |  |
| 7910494 | NM_022786   | ARV1           | ARV1 homolog (S. cerevisiae)                            | 0.140  | 1.102 | 2.99E-01 | 2.99E+01 |  |  |
| 7910503 | NM_00100434 | TRIM67         | tripartite motif-containing 67                          | -0.048 | 0.967 | 6.14E-01 | 6.14E+01 |  |  |
| 7910520 | NM_014236   | GNPAT          | glyceronephosphate O-acyltransferase                    | 0.034  | 1.024 | 7.94E-01 | 7.94E+01 |  |  |
| 7910539 | NM_00101098 | C1orf124       | chromosome 1 open reading frame                         | -0.076 | 0.948 | 5.74E-01 | 5.74E+01 |  |  |
| 7910550 | NM_005999   | TSNAX          | translin-associated factor X                            | 0.040  | 1.028 | 8.33E-01 | 8.33E+01 |  |  |
| 7910559 | NM_018662   | DISC1          | disrupted in schizophrenia 1                            | 0.117  | 1.084 | 3.28E-02 | 3.28E+00 |  |  |
| 7910585 | ---         | ---            | ---                                                     | 0.021  | 1.015 | 8.70E-01 | 8.70E+01 |  |  |
| 7910589 | NM_019090   | KIAA1383       | KIAA1383                                                | 0.103  | 1.074 | 1.75E-01 | 1.75E+01 |  |  |
| 7910591 | NM_032324   | C1orf57        | chromosome 1 open reading frame                         | -0.003 | 0.998 | 9.92E-01 | 9.92E+01 |  |  |
| 7910611 | NM_002245   | KCNK1          | potassium channel, subfamily K, member 1                | 0.072  | 1.051 | 3.09E-01 | 3.09E+01 |  |  |
| 7910618 | NM_173508   | SLC35F3        | solute carrier family 35, member F                      | -0.030 | 0.979 | 7.77E-01 | 7.77E+01 |  |  |
| 7910630 | BC116455    | C1orf31        | chromosome 1 open reading frame                         | 0.182  | 1.134 | 5.86E-02 | 5.86E+00 |  |  |
| 7910636 | ---         | ---            | ---                                                     | -0.116 | 0.923 | 6.34E-01 | 6.34E+01 |  |  |
| 7910638 | ---         | ---            | ---                                                     | 0.020  | 1.014 | 9.12E-01 | 9.12E+01 |  |  |
| 7910640 | NM_004837   | GGPS1          | geranylgeranyl diphosphate synthase                     | 0.003  | 1.002 | 9.88E-01 | 9.88E+01 |  |  |
| 7910676 | ---         | ---            | ---                                                     | 0.012  | 1.008 | 9.54E-01 | 9.54E+01 |  |  |
| 7910680 | NM_003272   | GPR137B        | G protein-coupled receptor 137B                         | -0.087 | 0.942 | 7.70E-01 | 7.70E+01 |  |  |
| 7910694 | NM_080738   | EDARADD        | EDAR-associated death domain                            | -0.051 | 0.966 | 7.51E-01 | 7.51E+01 |  |  |
| 7910706 | NM_006499   | LGALS8         | lectin, galactoside-binding, soluble 8                  | -0.143 | 0.906 | 9.39E-02 | 9.39E+00 |  |  |
| 7910752 | NM_000254   | MTR            | 5-methyltetrahydrofolate-homocysteine methyltransferase | 0.033  | 1.023 | 8.46E-01 | 8.46E+01 |  |  |
| 7910790 | ---         | ---            | ---                                                     | 0.029  | 1.020 | 8.78E-01 | 8.78E+01 |  |  |
| 7910897 | ---         | ---            | ---                                                     | -0.043 | 0.970 | 7.38E-01 | 7.38E+01 |  |  |
| 7910899 | ---         | ---            | ---                                                     | -0.109 | 0.928 | 2.34E-01 | 2.34E+01 |  |  |
| 7910901 | NR_027247   | LOC100130331   | actin, gamma-like                                       | 0.065  | 1.046 | 6.57E-01 | 6.57E+01 |  |  |
| 7910913 | ---         | ---            | ---                                                     | 0.027  | 1.019 | 8.06E-01 | 8.06E+01 |  |  |
| 7911017 | NM_006642   | SDCCAG8        | serologically defined colon cancer antigen 8            | -0.062 | 0.958 | 7.25E-01 | 7.25E+01 |  |  |

|         |             |               |                                       |        |       |          |          |
|---------|-------------|---------------|---------------------------------------|--------|-------|----------|----------|
| 7911038 | NM_205768   | ZNF238        | zinc finger protein 238               | 0.005  | 1.004 | 9.88E-01 | 9.88E+01 |
| 7911047 | ---         | ---           | ---                                   | -0.009 | 0.994 | 9.64E-01 | 9.64E+01 |
| 7911078 | NM_016076   | PPPE1         | PPPDE peptidase domain containi       | -0.037 | 0.975 | 8.57E-01 | 8.57E+01 |
| 7911085 | NM_198076   | FAM36A        | family with sequence similarity 36    | -0.026 | 0.982 | 8.32E-01 | 8.32E+01 |
| 7911092 | ---         | ---           | ---                                   | -0.003 | 0.998 | 9.89E-01 | 9.89E+01 |
| 7911108 | ---         | ---           | ---                                   | -0.022 | 0.985 | 9.52E-01 | 9.52E+01 |
| 7911110 | ---         | ---           | ---                                   | 0.082  | 1.058 | 6.08E-01 | 6.08E+01 |
| 7911114 | NM_018012   | KIF26B        | kinesin family member 26B             | -0.002 | 0.999 | 9.91E-01 | 9.91E+01 |
| 7911136 | ---         | ---           | ---                                   | -0.067 | 0.955 | 9.24E-01 | 9.24E+01 |
| 7911138 | NM_152609   | C1orf71       | chromosome 1 open reading fram        | 0.032  | 1.022 | 8.69E-01 | 8.69E+01 |
| 7911155 | NM_016002   | SCCPDH        | saccharopine dehydrogenase (put       | 0.044  | 1.031 | 8.70E-01 | 8.70E+01 |
| 7911176 | ---         | ---           | ---                                   | -0.164 | 0.893 | 5.98E-01 | 5.98E+01 |
| 7911218 | NM_015431   | TRIM58        | tripartite motif-containing 58        | 0.004  | 1.003 | 9.81E-01 | 9.81E+01 |
| 7911229 | NM_00100195 | OR2W3         | olfactory receptor, family 2, subfa   | -0.026 | 0.982 | 8.86E-01 | 8.86E+01 |
| 7911231 | NM_00100195 | OR2W3         | olfactory receptor, family 2, subfa   | -0.026 | 0.982 | 8.86E-01 | 8.86E+01 |
| 7911241 | NM_00100196 | OR2L8         | olfactory receptor, family 2, subfa   | 0.223  | 1.167 | 3.94E-01 | 3.94E+01 |
| 7911263 | NM_00100469 | OR2M5         | olfactory receptor, family 2, subfa   | 0.020  | 1.014 | 9.25E-01 | 9.25E+01 |
| 7911278 | NM_030904   | OR2T1         | olfactory receptor, family 2, subfa   | -0.036 | 0.975 | 8.38E-01 | 8.38E+01 |
| 7911283 | NM_00100549 | OR2T3         | olfactory receptor, family 2, subfa   | 0.093  | 1.067 | 5.20E-01 | 5.20E+01 |
| 7911289 | NM_024836   | ZNF672        | zinc finger protein 672               | 0.051  | 1.036 | 6.34E-01 | 6.34E+01 |
| 7911307 | NR_024528   | RPL23AP7      | ribosomal protein L23a pseudogen      | 0.016  | 1.011 | 9.33E-01 | 9.33E+01 |
| 7911309 | NR_024540   | WASH5P        | WAS protein family homolog 5 pse      | -0.014 | 0.990 | 9.07E-01 | 9.07E+01 |
| 7911329 | NM_207366   | 40435         | septin 14                             | -0.026 | 0.982 | 9.22E-01 | 9.22E+01 |
| 7911331 | ---         | ---           | ---                                   | 0.267  | 1.203 | 4.25E-01 | 4.25E+01 |
| 7911333 | NR_024528   | RPL23AP7      | ribosomal protein L23a pseudogen      | 0.012  | 1.008 | 9.49E-01 | 9.49E+01 |
| 7911335 | ---         | ---           | ---                                   | 0.060  | 1.043 | 8.78E-01 | 8.78E+01 |
| 7911337 | ---         | ---           | ---                                   | 0.189  | 1.140 | 7.09E-01 | 7.09E+01 |
| 7911339 | ---         | ---           | ---                                   | 0.288  | 1.221 | 4.48E-01 | 4.48E+01 |
| 7911341 | ---         | ---           | ---                                   | 0.087  | 1.062 | 8.03E-01 | 8.03E+01 |
| 7911343 | AF284753    | UIMC1         | ubiquitin interaction motif contain   | 0.033  | 1.023 | 8.45E-01 | 8.45E+01 |
| 7911347 | NM_207366   | 40435         | septin 14                             | -0.030 | 0.979 | 9.19E-01 | 9.19E+01 |
| 7911351 | NR_024321   | NCRNA00115    | non-protein coding RNA 115            | -0.104 | 0.931 | 3.00E-01 | 3.00E+01 |
| 7911355 | NM_177987   | RP11-631M21.2 | tubulin, beta 8                       | -0.089 | 0.940 | 3.56E-01 | 3.56E+01 |
| 7911359 | NM_015658   | NOC2L         | nucleolar complex associated 2 ho     | 0.005  | 1.004 | 9.84E-01 | 9.84E+01 |
| 7911371 | NR_027693   | C1orf170      | chromosome 1 open reading fram        | 0.007  | 1.005 | 9.67E-01 | 9.67E+01 |
| 7911376 | NM_00114246 | HES4          | hairy and enhancer of split 4 (Dros   | -0.001 | 0.999 | 9.94E-01 | 9.94E+01 |
| 7911383 | NM_017891   | C1orf159      | chromosome 1 open reading fram        | -0.035 | 0.976 | 8.05E-01 | 8.05E+01 |
| 7911403 | NM_004195   | TNFRSF18      | tumor necrosis factor receptor sug    | -0.049 | 0.967 | 6.70E-01 | 6.70E+01 |
| 7911413 | NM_003327   | TNFRSF4       | tumor necrosis factor receptor sug    | 0.005  | 1.004 | 9.80E-01 | 9.80E+01 |
| 7911422 | NM_016547   | SDF4          | stromal cell derived factor 4         | -0.067 | 0.955 | 5.01E-01 | 5.01E+01 |
| 7911435 | NM_00101498 | FAM132A       | family with sequence similarity 13    | -0.081 | 0.945 | 3.56E-01 | 3.56E+01 |
| 7911444 | NM_194458   | UBE2J2        | ubiquitin-conjugating enzyme E2,      | -0.029 | 0.980 | 8.46E-01 | 8.46E+01 |
| 7911458 | NM_030649   | ACAP3         | ArfGAP with coiled-coil, ankyrin re   | -0.005 | 0.996 | 9.74E-01 | 9.74E+01 |
| 7911486 | NM_017871   | CPSF3L        | cleavage and polyadenylation spe      | -0.062 | 0.958 | 6.23E-01 | 6.23E+01 |
| 7911506 | NM_004421   | DVL1          | dishevelled, dsh homolog 1 (Dros      | -0.007 | 0.995 | 9.64E-01 | 9.64E+01 |
| 7911529 | NM_032348   | MXRA8         | matrix-remodelling associated 8       | -0.132 | 0.913 | 9.26E-02 | 9.26E+00 |
| 7911532 | NM_017900   | AURKAIP1      | aurora kinase A interacting protei    | -0.003 | 0.998 | 9.88E-01 | 9.88E+01 |
| 7911539 | NM_00103957 | CCNL2         | cyclin L2                             | -0.023 | 0.984 | 8.83E-01 | 8.83E+01 |
| 7911559 | NM_017971   | MRPL20        | mitochondrial ribosomal protein L     | 0.023  | 1.016 | 8.95E-01 | 8.95E+01 |
| 7911566 | ---         | ---           | ---                                   | 0.147  | 1.107 | 4.51E-01 | 4.51E+01 |
| 7911568 | NM_014188   | SSU72         | SSU72 RNA polymerase II CTD pho       | -0.038 | 0.974 | 7.94E-01 | 7.94E+01 |
| 7911578 | NM_024011   | CDC2L2        | cell division cycle 2-like 2 (PITSLRE | -0.110 | 0.927 | 2.78E-01 | 2.78E+01 |
| 7911591 | NM_00111078 | RP11-345P4.4  | similar to solute carrier family 35,  | 0.007  | 1.005 | 9.68E-01 | 9.68E+01 |
| 7911600 | NM_023018   | NADK          | NAD kinase                            | -0.028 | 0.981 | 8.68E-01 | 8.68E+01 |
| 7911619 | NM_002074   | GNB1          | guanine nucleotide binding protei     | 0.102  | 1.073 | 2.57E-01 | 2.57E+01 |
| 7911634 | NM_178545   | TMEM52        | transmembrane protein 52              | -0.152 | 0.900 | 7.35E-03 | 7.35E-01 |
| 7911657 | AK094642    | hCG_1647286   | hypothetical protein LOC728690        | 0.043  | 1.030 | 7.53E-01 | 7.53E+01 |
| 7911676 | ---         | ---           | ---                                   | -0.032 | 0.978 | 8.36E-01 | 8.36E+01 |
| 7911681 | ---         | ---           | ---                                   | 0.065  | 1.046 | 6.09E-01 | 6.09E+01 |
| 7911683 | NM_182533   | C1orf86       | chromosome 1 open reading fram        | -0.017 | 0.989 | 8.94E-01 | 8.94E+01 |
| 7911699 | AK024162    | FLJ14100      | hypothetical protein FLJ14100         | 0.011  | 1.008 | 9.64E-01 | 9.64E+01 |
| 7911701 | NM_024848   | MORN1         | MORN repeat containing 1              | -0.024 | 0.984 | 8.61E-01 | 8.61E+01 |
| 7911718 | NR_024489   | LOC100129534  | small nuclear ribonucleoprotein p     | -0.128 | 0.915 | 2.11E-01 | 2.11E+01 |
| 7911720 | NM_153818   | PEX10         | peroxisomal biogenesis factor 10      | -0.059 | 0.960 | 6.49E-01 | 6.49E+01 |
| 7911730 | NM_018216   | PANK4         | pantothenate kinase 4                 | -0.031 | 0.979 | 8.02E-01 | 8.02E+01 |
| 7911750 | NM_00101092 | HES5          | hairy and enhancer of split 5 (Dros   | -0.051 | 0.965 | 5.95E-01 | 5.95E+01 |
| 7911754 | NM_003820   | TNFRSF14      | tumor necrosis factor receptor sug    | 0.011  | 1.008 | 9.56E-01 | 9.56E+01 |
| 7911793 | NR_015440   | FLJ42875      | hypothetical LOC440556                | 0.013  | 1.009 | 9.75E-01 | 9.75E+01 |
| 7911796 | NR_024371   | FLJ42875      | hypothetical LOC440556                | 0.041  | 1.028 | 7.93E-01 | 7.93E+01 |
| 7911799 | NM_001409   | MEGF6         | multiple EGF-like-domains 6           | -0.052 | 0.965 | 5.78E-01 | 5.78E+01 |
| 7911854 | NM_207306   | KIAA0495      | KIAA0495                              | -0.020 | 0.986 | 9.55E-01 | 9.55E+01 |
| 7911862 | NM_020710   | LRRC47        | leucine rich repeat containing 47     | -0.042 | 0.971 | 7.58E-01 | 7.58E+01 |
| 7911870 | NM_014704   | KIAA0562      | KIAA0562                              | -0.093 | 0.938 | 1.34E-01 | 1.34E+01 |
| 7911897 | NM_207356   | C1orf174      | chromosome 1 open reading fram        | -0.083 | 0.944 | 5.86E-01 | 5.86E+01 |
| 7911902 | NM_015102   | NPHP4         | nephronophthisis 4                    | 0.011  | 1.007 | 9.45E-01 | 9.45E+01 |
| 7911941 | NM_015557   | CHD5          | chromodomain helicase DNA bind        | 0.000  | 1.000 | 9.99E-01 | 9.99E+01 |
| 7911989 | NM_000983   | RPL22         | ribosomal protein L22                 | 0.116  | 1.084 | 5.72E-01 | 5.72E+01 |

|         |                            |               |                                        |        |       |          |          |  |  |
|---------|----------------------------|---------------|----------------------------------------|--------|-------|----------|----------|--|--|
| 7911993 | NM_012405                  | ICMT          | isoprenylcysteine carboxyl methyl      | -0.084 | 0.943 | 3.47E-01 | 3.47E+01 |  |  |
| 7912004 | NM_207370                  | GPR153        | G protein-coupled receptor 153         | -0.043 | 0.971 | 6.47E-01 | 6.47E+01 |  |  |
| 7912012 | NM_007274                  | ACOT7         | acyl-CoA thioesterase 7                | -0.029 | 0.980 | 7.23E-01 | 7.23E+01 |  |  |
| 7912031 | NM_019089                  | HES2          | hairy and enhancer of split 2 (Dros    | -0.102 | 0.931 | 2.16E-01 | 2.16E+01 |  |  |
| 7912040 | NM_148965                  | TNFRSF25      | tumor necrosis factor receptor sug     | -0.055 | 0.963 | 5.78E-01 | 5.78E+01 |  |  |
| 7912056 | NM_198681                  | PLEKHG5       | pleckstrin homology domain conta       | -0.009 | 0.994 | 9.64E-01 | 9.64E+01 |  |  |
| 7912086 | NM_024654                  | NOL9          | nucleolar protein 9                    | 0.078  | 1.055 | 7.24E-01 | 7.24E+01 |  |  |
| 7912112 | NM_018198                  | DNAJC11       | DnaJ (Hsp40) homolog, subfamily        | 0.086  | 1.061 | 4.02E-01 | 4.02E+01 |  |  |
| 7912133 | ENST00000439               | LOC100129476  | hypothetical protein LOC1001294        | 0.003  | 1.002 | 9.87E-01 | 9.87E+01 |  |  |
| 7912145 | NM_001561                  | TNFRSF9       | tumor necrosis factor receptor sug     | -0.295 | 0.815 | 4.37E-01 | 4.37E+01 |  |  |
| 7912155 | ---                        | ---           | ---                                    | 0.025  | 1.018 | 9.53E-01 | 9.53E+01 |  |  |
| 7912162 | ---                        | ---           | ---                                    | 0.020  | 1.014 | 8.75E-01 | 8.75E+01 |  |  |
| 7912166 | NM_012102                  | RERE          | arginine-glutamic acid dipeptide (f    | 0.112  | 1.081 | 7.26E-02 | 7.26E+00 |  |  |
| 7912194 | BC029383                   | DKFZp566H0824 | hypothetical LOC54744                  | 0.172  | 1.127 | 1.84E-01 | 1.84E+01 |  |  |
| 7912196 | ---                        | ---           | ---                                    | 0.041  | 1.029 | 9.35E-01 | 9.35E+01 |  |  |
| 7912198 | NM_001428                  | ENO1          | enolase 1, (alpha)                     | -0.051 | 0.965 | 8.53E-01 | 8.53E+01 |  |  |
| 7912211 | NM_207420                  | SLC2A7        | solute carrier family 2 (facilitated   | 0.004  | 1.003 | 9.85E-01 | 9.85E+01 |  |  |
| 7912224 | NM_003039                  | SLC2A5        | solute carrier family 2 (facilitated   | 0.160  | 1.117 | 4.89E-02 | 4.89E+00 |  |  |
| 7912239 | NM_024980                  | GPR157        | G protein-coupled receptor 157         | -0.035 | 0.976 | 7.88E-01 | 7.88E+01 |  |  |
| 7912250 | EF592573                   | MIR34A        | microRNA 34a                           | -0.015 | 0.990 | 9.15E-01 | 9.15E+01 |  |  |
| 7912252 | ---                        | ---           | ---                                    | 0.050  | 1.036 | 7.97E-01 | 7.97E+01 |  |  |
| 7912254 | NR_027045                  | C1orf200      | chromosome 1 open reading fram         | 0.028  | 1.020 | 8.41E-01 | 8.41E+01 |  |  |
| 7912257 | NM_00100956                | CLSTN1        | calysntenin 1                          | 0.021  | 1.015 | 8.87E-01 | 8.87E+01 |  |  |
| 7912283 | NM_020248                  | CTNNBIP1      | catenin, beta interacting protein 1    | -0.027 | 0.982 | 8.27E-01 | 8.27E+01 |  |  |
| 7912292 | NM_032368                  | LZIC          | leucine zipper and CTNNBIP1 dom        | 0.064  | 1.045 | 7.43E-01 | 7.43E+01 |  |  |
| 7912303 | NM_213566                  | DFFA          | DNA fragmentation factor, 45kDa,       | -0.083 | 0.944 | 6.04E-01 | 6.04E+01 |  |  |
| 7912316 | NM_00107984                | CASZ1         | castor zinc finger 1                   | -0.067 | 0.955 | 3.64E-01 | 3.64E+01 |  |  |
| 7912343 | NM_00107984                | CASZ1         | castor zinc finger 1                   | -0.072 | 0.951 | 7.04E-01 | 7.04E+01 |  |  |
| 7912347 | NM_00107984                | CASZ1         | castor zinc finger 1                   | -0.132 | 0.913 | 5.98E-01 | 5.98E+01 |  |  |
| 7912349 | BC126349                   | C1orf127      | chromosome 1 open reading fram         | -0.073 | 0.951 | 4.32E-01 | 4.32E+01 |  |  |
| 7912361 | NM_006610                  | MASP2         | mannan-binding lectin serine pept      | 0.022  | 1.015 | 8.73E-01 | 8.73E+01 |  |  |
| 7912374 | NM_003132                  | SRM           | spermidine synthase                    | 0.042  | 1.030 | 7.73E-01 | 7.73E+01 |  |  |
| 7912385 | NM_00100199                | EXOSC10       | exosome component 10                   | -0.052 | 0.964 | 6.20E-01 | 6.20E+01 |  |  |
| 7912412 | NM_004958                  | MTOR          | mechanistic target of rapamycin (s     | -0.048 | 0.967 | 7.46E-01 | 7.46E+01 |  |  |
| 7912473 | NM_012168                  | FBXO2         | F-box protein 2                        | -0.086 | 0.942 | 3.13E-01 | 3.13E+01 |  |  |
| 7912481 | NM_00112732                | MAD2L2        | MAD2 mitotic arrest deficient-like     | -0.087 | 0.942 | 4.10E-01 | 4.10E+01 |  |  |
| 7912496 | NM_005957                  | MTHFR         | 5,10-methylenetetrahydrofolate ri      | 0.087  | 1.062 | 6.11E-01 | 6.11E+01 |  |  |
| 7912511 | NM_138346                  | KIAA2013      | KIAA2013                               | -0.132 | 0.912 | 1.90E-01 | 1.90E+01 |  |  |
| 7912520 | NM_002521                  | NPPB          | natriuretic peptide precursor B        | 0.030  | 1.021 | 8.48E-01 | 8.48E+01 |  |  |
| 7912535 | ---                        | ---           | ---                                    | 0.236  | 1.177 | 5.97E-01 | 5.97E+01 |  |  |
| 7912537 | NM_004753                  | DHRS3         | dehydrogenase/reductase (SDR fa        | 0.018  | 1.013 | 9.53E-01 | 9.53E+01 |  |  |
| 7912585 | NM_00101369                | PRAMEF3       | PRAME family member 3                  | -0.041 | 0.972 | 7.94E-01 | 7.94E+01 |  |  |
| 7912591 | NM_00101227                | PRAMEF7       | PRAME family member 7                  | -0.052 | 0.965 | 6.34E-01 | 6.34E+01 |  |  |
| 7912606 | NM_00101227                | PRAMEF7       | PRAME family member 7                  | -0.052 | 0.965 | 6.34E-01 | 6.34E+01 |  |  |
| 7912622 | ENST000000376              | LRRC38        | leucine rich repeat containing 38      | -0.155 | 0.898 | 1.53E-01 | 1.53E+01 |  |  |
| 7912646 | NM_001229                  | CASP9         | caspase 9, apoptosis-related cyste     | -0.080 | 0.946 | 4.94E-01 | 4.94E+01 |  |  |
| 7912659 | NM_024758                  | AGMAT         | agmatine ureohydrolase (agmatin        | 0.104  | 1.074 | 3.41E-01 | 3.41E+01 |  |  |
| 7912670 | NM_006004                  | UQCRH         | ubiquinol-cytochrome c reductase       | 0.016  | 1.011 | 9.46E-01 | 9.46E+01 |  |  |
| 7912672 | NR_024279                  | hCG_2008140   | hypothetical LOC729614                 | 0.049  | 1.035 | 7.92E-01 | 7.92E+01 |  |  |
| 7912675 | NM_003443                  | ZBTB17        | zinc finger and BTB domain contai      | -0.055 | 0.963 | 6.23E-01 | 6.23E+01 |  |  |
| 7912701 | NM_182623                  | FAM131C       | family with sequence similarity 13     | 0.117  | 1.085 | 3.91E-01 | 3.91E+01 |  |  |
| 7912706 | NM_004431                  | EPHA2         | EPH receptor A2                        | -0.076 | 0.948 | 1.54E-01 | 1.54E+01 |  |  |
| 7912724 | NM_153213                  | ARHGEF19      | Rho guanine nucleotide exchange        | -0.062 | 0.958 | 4.77E-01 | 4.77E+01 |  |  |
| 7912743 | NM_030907                  | C1orf89       | chromosome 1 open reading fram         | 0.021  | 1.014 | 9.08E-01 | 9.08E+01 |  |  |
| 7912750 | NM_018994                  | FBXO42        | F-box protein 42                       | -0.020 | 0.986 | 9.09E-01 | 9.09E+01 |  |  |
| 7912762 | ---                        | ---           | ---                                    | 0.025  | 1.017 | 9.34E-01 | 9.34E+01 |  |  |
| 7912764 | NM_198546                  | SPATA21       | spermatogenesis associated 21          | -0.016 | 0.989 | 9.16E-01 | 9.16E+01 |  |  |
| 7912784 | NR_023386                  | CROCC2        | ciliary rootlet coiled-coil, rootletin | -0.012 | 0.992 | 9.53E-01 | 9.53E+01 |  |  |
| 7912802 | BC036435                   | LOC100132147  | hypothetical LOC100132147              | 0.036  | 1.025 | 9.13E-01 | 9.13E+01 |  |  |
| 7912804 | BC036435                   | LOC100132147  | hypothetical LOC100132147              | -0.024 | 0.984 | 9.28E-01 | 9.28E+01 |  |  |
| 7912808 | NM_00110266                | NBPF16        | neuroblastoma breakpoint family,       | -0.073 | 0.951 | 3.24E-01 | 3.24E+01 |  |  |
| 7912839 | NR_026752                  | CROCC1        | ciliary rootlet coiled-coil, rootletin | -0.106 | 0.929 | 4.52E-01 | 4.52E+01 |  |  |
| 7912852 | NM_001412                  | EIF1AX        | eukaryotic translation initiation fa   | -0.033 | 0.978 | 8.80E-01 | 8.80E+01 |  |  |
| 7912854 | NR_026567                  | ESPMP         | espin pseudogene                       | -0.016 | 0.989 | 9.51E-01 | 9.51E+01 |  |  |
| 7912861 | ENST000003694634           | // LOC64      | similar to UPF0627 protein ENSPO       | 0.002  | 1.001 | 9.90E-01 | 9.90E+01 |  |  |
| 7912863 | NR_002729                  | MSTP9         | macrophage stimulating, pseudog        | -0.074 | 0.950 | 3.79E-01 | 3.79E+01 |  |  |
| 7912884 | BC126340 // B32147 // LOC1 |               | hypothetical LOC100132147 // hy        | 0.003  | 1.002 | 9.90E-01 | 9.90E+01 |  |  |
| 7912887 | NM_002403                  | MFAP2         | microfibrillar-associated protein 2    | -0.043 | 0.971 | 7.67E-01 | 7.67E+01 |  |  |
| 7912898 | NM_022089                  | ATP13A2       | ATPase type 13A2                       | 0.023  | 1.016 | 8.73E-01 | 8.73E+01 |  |  |
| 7912928 | NM_003000                  | SDHB          | succinate dehydrogenase complex        | 0.133  | 1.097 | 5.74E-01 | 5.74E+01 |  |  |
| 7912956 | NM_00113620                | RCC2          | regulator of chromosome condens        | 0.054  | 1.038 | 5.43E-01 | 5.43E+01 |  |  |
| 7912968 | NM_152232                  | TAS1R2        | taste receptor, type 1, member 2       | 0.015  | 1.011 | 9.28E-01 | 9.28E+01 |  |  |
| 7912994 | NM_00113626                | IFFO2         | intermediate filament family orph      | -0.037 | 0.975 | 8.73E-01 | 8.73E+01 |  |  |
| 7913001 | NM_020765                  | UBR4          | ubiquitin protein ligase E3 compo      | -0.138 | 0.909 | 2.84E-02 | 2.84E+00 |  |  |
| 7913110 | BC034589                   | KIAA0090      | KIAA0090                               | -0.016 | 0.989 | 9.45E-01 | 9.45E+01 |  |  |
| 7913146 | NM_012067                  | AKR7A3        | aldo-keto reductase family 7, men      | -0.078 | 0.947 | 5.01E-01 | 5.01E+01 |  |  |
| 7913156 | NM_003689                  | AKR7A2        | aldo-keto reductase family 7, men      | 0.083  | 1.059 | 2.95E-01 | 2.95E+01 |  |  |

|         |             |          |                                       |        |       |          |          |  |  |
|---------|-------------|----------|---------------------------------------|--------|-------|----------|----------|--|--|
| 7913169 | NM_004930   | CAPZB    | capping protein (actin filament) m    | 0.199  | 1.148 | 3.08E-02 | 3.08E+00 |  |  |
| 7913185 | ---         | ---      | ---                                   | -0.080 | 0.946 | 8.16E-01 | 8.16E+01 |  |  |
| 7913187 | NM_181719   | TMCO4    | transmembrane and coiled-coil do      | 0.008  | 1.006 | 9.63E-01 | 9.63E+01 |  |  |
| 7913206 | NM_019062   | RNF186   | ring finger protein 186               | -0.078 | 0.947 | 3.41E-01 | 3.41E+01 |  |  |
| 7913211 | NM_014589   | PLA2G2E  | phospholipase A2, group IIE           | 0.033  | 1.023 | 8.13E-01 | 8.13E+01 |  |  |
| 7913216 | NM_000300   | PLA2G2A  | phospholipase A2, group IIA (plate    | -0.063 | 0.957 | 5.94E-01 | 5.94E+01 |  |  |
| 7913226 | NM_012400   | PLA2G2D  | phospholipase A2, group IID           | -0.057 | 0.961 | 4.93E-01 | 4.93E+01 |  |  |
| 7913235 | NM_00110557 | PLA2G2C  | phospholipase A2, group IIC           | -0.024 | 0.984 | 8.97E-01 | 8.97E+01 |  |  |
| 7913237 | NM_018584   | CAMK2N1  | calcium/calmodulin-dependent pr       | -0.260 | 0.835 | 1.62E-02 | 1.62E+00 |  |  |
| 7913242 | NM_024544   | MUL1     | mitochondrial E3 ubiquitin ligase 1   | -0.093 | 0.937 | 2.27E-01 | 2.27E+01 |  |  |
| 7913249 | NM_032409   | PINK1    | PTEN induced putative kinase 1        | -0.120 | 0.920 | 5.87E-01 | 5.87E+01 |  |  |
| 7913252 | NM_032409   | PINK1    | PTEN induced putative kinase 1        | -0.003 | 0.998 | 9.89E-01 | 9.89E+01 |  |  |
| 7913256 | NM_005216   | DDOST    | dolichyl-diphosphooligosaccharide     | 0.113  | 1.081 | 2.93E-01 | 2.93E+01 |  |  |
| 7913271 | NM_020816   | KIF17    | kinesin family member 17              | -0.085 | 0.943 | 3.94E-01 | 3.94E+01 |  |  |
| 7913290 | NM_00110316 | SH2D5    | SH2 domain containing 5               | -0.051 | 0.965 | 6.82E-01 | 6.82E+01 |  |  |
| 7913300 | NM_016287   | HP1BP3   | heterochromatin protein 1, bindin     | -0.020 | 0.986 | 8.73E-01 | 8.73E+01 |  |  |
| 7913319 | NM_003760   | EIF4G3   | eukaryotic translation initiation fa  | 0.089  | 1.064 | 5.19E-01 | 5.19E+01 |  |  |
| 7913357 | NM_001397   | ECE1     | endothelin converting enzyme 1        | -0.178 | 0.884 | 2.81E-01 | 2.81E+01 |  |  |
| 7913380 | NM_032264   | NBPf3    | neuroblastoma breakpoint family,      | -0.006 | 0.996 | 9.61E-01 | 9.61E+01 |  |  |
| 7913385 | NM_00114565 | RAP1GAP  | RAP1 GTPase activating protein        | 0.060  | 1.042 | 5.64E-01 | 5.64E+01 |  |  |
| 7913415 | NM_032236   | USP48    | ubiquitin specific peptidase 48       | 0.025  | 1.018 | 8.61E-01 | 8.61E+01 |  |  |
| 7913450 | NM_005529   | HSPG2    | heparan sulfate proteoglycan 2        | -0.010 | 0.993 | 9.24E-01 | 9.24E+01 |  |  |
| 7913547 | NM_030761   | WNT4     | wingless-type MMTV integration s      | -0.021 | 0.986 | 8.68E-01 | 8.68E+01 |  |  |
| 7913558 | NM_033631   | LUZP1    | leucine zipper protein 1              | -0.066 | 0.955 | 5.58E-01 | 5.58E+01 |  |  |
| 7913566 | NM_000864   | HTR1D    | 5-hydroxytryptamine (serotonin) r     | -0.024 | 0.984 | 8.79E-01 | 8.79E+01 |  |  |
| 7913571 | NM_00110239 | HNRNPR   | heterogeneous nuclear ribonucleo      | 0.018  | 1.012 | 8.55E-01 | 8.55E+01 |  |  |
| 7913582 | NM_00107719 | ZNF436   | zinc finger protein 436               | -0.108 | 0.928 | 1.65E-01 | 1.65E+01 |  |  |
| 7913593 | NM_003196   | TCEA3    | transcription elongation factor A (   | -0.169 | 0.889 | 4.13E-01 | 4.13E+01 |  |  |
| 7913609 | NM_017707   | ASAP3    | ArfGAP with SH3 domain, ankyrin       | -0.073 | 0.951 | 3.42E-01 | 3.42E+01 |  |  |
| 7913644 | NM_004091   | E2F2     | E2F transcription factor 2            | 0.056  | 1.039 | 5.56E-01 | 5.56E+01 |  |  |
| 7913665 | ---         | ---      | ---                                   | -0.042 | 0.971 | 7.81E-01 | 7.81E+01 |  |  |
| 7913667 | NM_000403   | GALE     | UDP-galactose-4-epimerase             | -0.074 | 0.950 | 3.70E-01 | 3.70E+01 |  |  |
| 7913682 | NM_000191   | HMGCL    | 3-hydroxymethyl-3-methylglutaryl      | -0.003 | 0.998 | 9.89E-01 | 9.89E+01 |  |  |
| 7913705 | NM_001841   | CNR2     | cannabinoid receptor 2 (macrophag     | -0.006 | 0.996 | 9.84E-01 | 9.84E+01 |  |  |
| 7913712 | NM_006625   | FUSIP1   | FUS interacting protein (serine/arg   | 0.020  | 1.014 | 9.08E-01 | 9.08E+01 |  |  |
| 7913776 | NM_170743   | IL28RA   | interleukin 28 receptor, alpha (int   | 0.104  | 1.075 | 2.40E-01 | 2.40E+01 |  |  |
| 7913803 | ---         | ---      | ---                                   | 0.081  | 1.057 | 9.23E-01 | 9.23E+01 |  |  |
| 7913805 | NM_00103168 | RUNX3    | runt-related transcription factor 3   | -0.229 | 0.853 | 2.58E-02 | 2.58E+00 |  |  |
| 7913814 | NM_015484   | SYF2     | SYF2 homolog, RNA splicing factor     | -0.026 | 0.982 | 8.32E-01 | 8.32E+01 |  |  |
| 7913824 | NM_020317   | C1orf63  | chromosome 1 open reading fram        | -0.018 | 0.988 | 9.44E-01 | 9.44E+01 |  |  |
| 7913850 | NM_019557   | FAM54B   | family with sequence similarity 54    | -0.021 | 0.986 | 8.52E-01 | 8.52E+01 |  |  |
| 7913864 | NM_00114545 | STMN1    | stathmin 1                            | -0.010 | 0.993 | 9.53E-01 | 9.53E+01 |  |  |
| 7913869 | NM_203401   | STMN1    | stathmin 1                            | -0.049 | 0.967 | 8.34E-01 | 8.34E+01 |  |  |
| 7913883 | NM_000437   | PAFAH2   | platelet-activating factor acetylhyd  | 0.027  | 1.019 | 8.78E-01 | 8.78E+01 |  |  |
| 7913896 | NM_00100443 | SLC30A2  | solute carrier family 30 (zinc trans  | -0.033 | 0.978 | 8.74E-01 | 8.74E+01 |  |  |
| 7913918 | NM_183008   | UBXN11   | UBX domain protein 11                 | 0.019  | 1.013 | 9.36E-01 | 9.36E+01 |  |  |
| 7913938 | NM_00103977 | AIM1L    | absent in melanoma 1-like             | -0.012 | 0.992 | 9.24E-01 | 9.24E+01 |  |  |
| 7913965 | NM_00111475 | ZNF683   | zinc finger protein 683               | -0.040 | 0.972 | 8.04E-01 | 8.04E+01 |  |  |
| 7913978 | NM_018066   | GNP2     | GNP-loop GTPase 2                     | -0.130 | 0.914 | 1.00E-01 | 1.00E+01 |  |  |
| 7913990 | NM_022078   | GPATCH3  | G patch domain containing 3           | -0.076 | 0.949 | 4.51E-01 | 4.51E+01 |  |  |
| 7914000 | NM_021969   | NROB2    | nuclear receptor subfamily 0, grou    | -0.074 | 0.950 | 6.09E-01 | 6.09E+01 |  |  |
| 7914003 | BC033143    | C1orf172 | chromosome 1 open reading fram        | -0.072 | 0.951 | 2.84E-01 | 2.84E+01 |  |  |
| 7914015 | NM_052943   | FAM46B   | family with sequence similarity 46    | -0.025 | 0.983 | 8.61E-01 | 8.61E+01 |  |  |
| 7914021 | NM_003047   | SLC9A1   | solute carrier family 9 (sodium/hy    | -0.035 | 0.976 | 7.87E-01 | 7.87E+01 |  |  |
| 7914040 | ---         | ---      | ---                                   | -0.013 | 0.991 | 9.44E-01 | 9.44E+01 |  |  |
| 7914042 | NM_004672   | MAP3K6   | mitogen-activated protein kinase f    | -0.065 | 0.956 | 4.50E-01 | 4.50E+01 |  |  |
| 7914075 | NM_003665   | FCN3     | ficolin (collagen/fibrinogen domai    | 0.045  | 1.032 | 6.70E-01 | 6.70E+01 |  |  |
| 7914084 | NM_207397   | CD164L2  | CD164 sialomucin-like 2               | 0.070  | 1.050 | 4.69E-01 | 4.69E+01 |  |  |
| 7914094 | NM_006990   | WASF2    | WAS protein family, member 2          | 0.059  | 1.041 | 6.01E-01 | 6.01E+01 |  |  |
| 7914103 | NM_00102988 | AHDC1    | AT hook, DNA binding motif, conta     | 0.025  | 1.017 | 8.54E-01 | 8.54E+01 |  |  |
| 7914112 | NM_005248   | FGR      | Gardner-Rasheed feline sarcoma v      | 0.161  | 1.118 | 2.89E-01 | 2.89E+01 |  |  |
| 7914127 | NM_002038   | IFI6     | interferon, alpha-inducible protei    | 0.270  | 1.206 | 3.04E-01 | 3.04E+01 |  |  |
| 7914139 | NM_014110   | PPP1R8   | protein phosphatase 1, regulatory     | -0.074 | 0.950 | 7.91E-01 | 7.91E+01 |  |  |
| 7914141 | NM_002946   | RPA2     | replication protein A2, 32kDa         | -0.045 | 0.969 | 7.77E-01 | 7.77E+01 |  |  |
| 7914153 | NM_001990   | EYA3     | eyes absent homolog 3 (Drosophila     | 0.015  | 1.011 | 9.56E-01 | 9.56E+01 |  |  |
| 7914178 | ---         | ---      | ---                                   | -0.024 | 0.984 | 9.21E-01 | 9.21E+01 |  |  |
| 7914180 | NM_014752   | SPCS2    | signal peptidase complex subunit      | 0.216  | 1.162 | 4.12E-02 | 4.12E+00 |  |  |
| 7914184 | NM_000952   | PTAFR    | platelet-activating factor receptor   | -0.045 | 0.969 | 8.67E-01 | 8.67E+01 |  |  |
| 7914194 | NM_014280   | DNAJC8   | DnaJ (Hsp40) homolog, subfamily       | 0.002  | 1.002 | 9.88E-01 | 9.88E+01 |  |  |
| 7914202 | AY277594    | SNHG12   | small nucleolar RNA host gene 12      | -0.076 | 0.949 | 7.17E-01 | 7.17E+01 |  |  |
| 7914212 | NR_002987   | SNORA61  | small nucleolar RNA, H/ACA box 6      | -0.136 | 0.910 | 7.03E-01 | 7.03E+01 |  |  |
| 7914214 | NR_002976   | SNORA44  | small nucleolar RNA, H/ACA box 4      | 0.108  | 1.078 | 4.93E-01 | 4.93E+01 |  |  |
| 7914216 | NR_003035   | SNORA16A | small nucleolar RNA, H/ACA box 1      | -0.058 | 0.960 | 8.97E-01 | 8.97E+01 |  |  |
| 7914218 | NM_00113521 | TAF12    | TAF12 RNA polymerase II, TATA bo      | -0.001 | 0.999 | 9.94E-01 | 9.94E+01 |  |  |
| 7914232 | NM_00100368 | TMEM200B | transmembrane protein 200B            | -0.036 | 0.975 | 7.27E-01 | 7.27E+01 |  |  |
| 7914235 | NM_005626   | SFRS4    | splicing factor, arginine/serine-rich | 0.002  | 1.001 | 9.90E-01 | 9.90E+01 |  |  |
| 7914245 | NM_00102473 | MECR     | mitochondrial trans-2-enoyl-CoA r     | 0.064  | 1.046 | 5.55E-01 | 5.55E+01 |  |  |

|         |              |           |                                       |        |       |          |          |  |  |
|---------|--------------|-----------|---------------------------------------|--------|-------|----------|----------|--|--|
| 7914270 | NM_006762    | LAPTM5    | lysosomal protein transmembrane       | 0.188  | 1.139 | 1.68E-01 | 1.68E+01 |  |  |
| 7914282 | NM_014654    | SDC3      | syndecan 3                            | 0.215  | 1.160 | 7.90E-03 | 7.90E-01 |  |  |
| 7914296 | NM_00102065  | PUM1      | pumilio homolog 1 (Drosophila)        | 0.018  | 1.013 | 8.89E-01 | 8.89E+01 |  |  |
| 7914326 | NM_024522    | NKAIN1    | Na+/K+ transporting ATPase inter      | -0.059 | 0.960 | 4.31E-01 | 4.31E+01 |  |  |
| 7914334 | NM_004814    | SNRNP40   | small nuclear ribonucleoprotein 4     | -0.007 | 0.995 | 9.82E-01 | 9.82E+01 |  |  |
| 7914342 | NM_004102    | FABP3     | fatty acid binding protein 3, muscul  | -0.014 | 0.991 | 9.64E-01 | 9.64E+01 |  |  |
| 7914350 | NM_178865    | SERINC2   | serine incorporator 2                 | -0.059 | 0.960 | 7.29E-01 | 7.29E+01 |  |  |
| 7914354 | NM_012392    | PEF1      | penta-EF-hand domain containing       | -0.137 | 0.910 | 3.69E-01 | 3.69E+01 |  |  |
| 7914361 | NM_001856    | COL16A1   | collagen, type XVI, alpha 1           | -0.058 | 0.960 | 4.27E-01 | 4.27E+01 |  |  |
| 7914433 | NM_001703    | BAI2      | brain-specific angiogenesis inhibit   | 0.007  | 1.005 | 9.68E-01 | 9.68E+01 |  |  |
| 7914467 | NM_144569    | SPOCD1    | SPOC domain containing 1              | -0.020 | 0.987 | 9.19E-01 | 9.19E+01 |  |  |
| 7914489 | NM_080391    | PTP4A2    | protein tyrosine phosphatase type     | 0.057  | 1.040 | 3.09E-01 | 3.09E+01 |  |  |
| 7914500 | AF258548     | C1orf91   | chromosome 1 open reading fram        | -0.075 | 0.949 | 4.29E-01 | 4.29E+01 |  |  |
| 7914516 | NR_026850    | MTMR9L    | myotubularin related protein 9-lik    | -0.044 | 0.970 | 6.55E-01 | 6.55E+01 |  |  |
| 7914525 | NM_023009    | MARCKSL1  | MARCKS-like 1                         | -0.115 | 0.923 | 8.46E-02 | 8.46E+00 |  |  |
| 7914530 | NM_00114388  | BSDC1     | BSD domain containing 1               | -0.118 | 0.922 | 1.72E-01 | 1.72E+01 |  |  |
| 7914550 | NM_178547    | ZBTB80S   | zinc finger and BTB domain contai     | -0.027 | 0.981 | 9.38E-01 | 9.38E+01 |  |  |
| 7914555 | ---          | ---       | ---                                   | 0.141  | 1.102 | 5.67E-01 | 5.67E+01 |  |  |
| 7914557 | NM_030786    | SYNC      | syncollin, intermediate filament pr   | -0.039 | 0.973 | 8.15E-01 | 8.15E+01 |  |  |
| 7914563 | NM_003680    | YARS      | tyrosyl-tRNA synthetase               | -0.109 | 0.927 | 4.48E-01 | 4.48E+01 |  |  |
| 7914580 | NM_153756    | FNDC5     | fibronectin type III domain contain   | -0.076 | 0.949 | 3.89E-01 | 3.89E+01 |  |  |
| 7914592 | NM_033504    | TMEM54    | transmembrane protein 54              | -0.033 | 0.977 | 7.94E-01 | 7.94E+01 |  |  |
| 7914603 | NM_153341    | RNF19B    | ring finger protein 19B               | -0.241 | 0.846 | 3.69E-01 | 3.69E+01 |  |  |
| 7914617 | NM_013411    | AK2       | adenylate kinase 2                    | 0.112  | 1.080 | 2.70E-01 | 2.70E+01 |  |  |
| 7914628 | ---          | ---       | ---                                   | 0.122  | 1.089 | 5.15E-01 | 5.15E+01 |  |  |
| 7914630 | NM_018207    | TRIM62    | tripartite motif-containing 62        | 0.046  | 1.032 | 6.75E-01 | 6.75E+01 |  |  |
| 7914648 | NM_198040    | PHC2      | polyhomeotic homolog 2 (Drosophi      | 0.004  | 1.003 | 9.85E-01 | 9.85E+01 |  |  |
| 7914665 | ---          | ---       | ---                                   | -0.218 | 0.860 | 1.84E-01 | 1.84E+01 |  |  |
| 7914750 | BC034598     | C1orf212  | chromosome 1 open reading fram        | 0.020  | 1.014 | 9.15E-01 | 9.15E+01 |  |  |
| 7914758 | NM_00108041  | DLGAP3    | discs, large (Drosophila) homolog-    | 0.007  | 1.005 | 9.76E-01 | 9.76E+01 |  |  |
| 7914764 | NM_007167    | ZMYM6     | zinc finger, MYM-type 6               | 0.003  | 1.002 | 9.85E-01 | 9.85E+01 |  |  |
| 7914791 | NM_005066    | SFPQ      | splicing factor proline/glutamine-r   | -0.038 | 0.974 | 7.49E-01 | 7.49E+01 |  |  |
| 7914809 | NM_024874    | KIAA0319L | KIAA0319-like                         | -0.117 | 0.922 | 1.81E-01 | 1.81E+01 |  |  |
| 7914834 | NM_002794    | PSMB2     | proteasome (prosome, macropain        | 0.063  | 1.045 | 6.57E-01 | 6.57E+01 |  |  |
| 7914847 | BC026909     | C1orf216  | chromosome 1 open reading fram        | -0.004 | 0.997 | 9.82E-01 | 9.82E+01 |  |  |
| 7914880 | NM_005202    | COL8A2    | collagen, type VIII, alpha 2          | 0.013  | 1.009 | 9.49E-01 | 9.49E+01 |  |  |
| 7914887 | NM_014408    | TRAPPC3   | trafficking protein particle comple   | -0.020 | 0.986 | 9.24E-01 | 9.24E+01 |  |  |
| 7914898 | ENST00000312 | C1orf113  | chromosome 1 open reading fram        | -0.037 | 0.975 | 7.75E-01 | 7.75E+01 |  |  |
| 7914904 | NM_032017    | STK40     | serine/threonine kinase 40            | -0.055 | 0.963 | 7.56E-01 | 7.56E+01 |  |  |
| 7914917 | NM_032881    | LSM10     | LSM10, U7 small nuclear RNA asse      | 0.089  | 1.064 | 4.95E-01 | 4.95E+01 |  |  |
| 7914921 | ---          | ---       | ---                                   | 0.021  | 1.015 | 8.97E-01 | 8.97E+01 |  |  |
| 7914923 | NM_145047    | OSCP1     | organic solute carrier partner 1      | 0.090  | 1.065 | 4.04E-01 | 4.04E+01 |  |  |
| 7914940 | NM_031280    | MRPS15    | mitochondrial ribosomal protein S     | 0.048  | 1.034 | 7.56E-01 | 7.56E+01 |  |  |
| 7914974 | NM_000831    | GRIK3     | glutamate receptor, ionotropic, ka    | -0.090 | 0.940 | 2.43E-01 | 2.43E+01 |  |  |
| 7914996 | BX538212     | MEAF6     | MYST/Esa1-associated factor 6         | -0.066 | 0.956 | 6.44E-01 | 6.44E+01 |  |  |
| 7915008 | NM_024700    | SNIP1     | Smad nuclear interacting protein 1    | -0.058 | 0.961 | 5.48E-01 | 5.48E+01 |  |  |
| 7915015 | NM_013285    | GNL2      | guanine nucleotide binding protei     | 0.038  | 1.027 | 8.33E-01 | 8.33E+01 |  |  |
| 7915032 | NM_00103863  | RSP01     | R-spondin homolog (Xenopus laevis)    | 0.027  | 1.019 | 8.42E-01 | 8.42E+01 |  |  |
| 7915078 | NM_173641    | EPHA10    | EPH receptor A10                      | -0.013 | 0.991 | 9.36E-01 | 9.36E+01 |  |  |
| 7915084 | NM_024640    | YRDC      | yrdC domain containing (E. coli)      | -0.072 | 0.951 | 6.84E-01 | 6.84E+01 |  |  |
| 7915091 | NM_005955    | MTF1      | metal-regulatory transcription fac    | -0.361 | 0.778 | 9.38E-02 | 9.38E+00 |  |  |
| 7915101 | NM_005540    | INPP5B    | inositol polyphosphate-5-phosphat     | -0.021 | 0.986 | 9.10E-01 | 9.10E+01 |  |  |
| 7915130 | NM_006802    | SF3A3     | splicing factor 3a, subunit 3, 60kDa  | -0.014 | 0.990 | 9.53E-01 | 9.53E+01 |  |  |
| 7915147 | NM_004468    | FHL3      | four and a half LIM domains 3         | -0.041 | 0.972 | 7.48E-01 | 7.48E+01 |  |  |
| 7915156 | NM_002699    | POU3F1    | POU class 3 homeobox 1                | -0.054 | 0.964 | 7.47E-01 | 7.47E+01 |  |  |
| 7915160 | NM_022157    | RRAGC     | Ras-related GTP binding C             | -0.007 | 0.995 | 9.82E-01 | 9.82E+01 |  |  |
| 7915170 | NM_012333    | MYCBP     | c-myc binding protein                 | -0.054 | 0.963 | 6.97E-01 | 6.97E+01 |  |  |
| 7915200 | ---          | ---       | ---                                   | 0.134  | 1.098 | 4.81E-01 | 4.81E+01 |  |  |
| 7915202 | ---          | ---       | ---                                   | 0.018  | 1.013 | 9.40E-01 | 9.40E+01 |  |  |
| 7915207 | NM_00113565  | PABPC4    | poly(A) binding protein, cytoplasm    | 0.028  | 1.020 | 8.38E-01 | 8.38E+01 |  |  |
| 7915227 | NR_002983    | SNORA55   | small nucleolar RNA, H/ACA box 5      | 0.043  | 1.030 | 8.22E-01 | 8.22E+01 |  |  |
| 7915229 | NM_014571    | HEYL      | hairly/enhancer-of-split related wit  | -0.092 | 0.938 | 2.98E-01 | 2.98E+01 |  |  |
| 7915238 | NM_032526    | NT5C1A    | 5'-nucleotidase, cytosolic 1A         | 0.013  | 1.009 | 9.29E-01 | 9.29E+01 |  |  |
| 7915245 | NM_016257    | HPCAL4    | hippocalcin like 4                    | -0.013 | 0.991 | 9.68E-01 | 9.68E+01 |  |  |
| 7915252 | NM_001720    | BMP8B     | bone morphogenetic protein 8b         | -0.118 | 0.922 | 3.62E-01 | 3.62E+01 |  |  |
| 7915257 | NM_022120    | OXCT2     | 3-oxoacid CoA transferase 2           | -0.036 | 0.975 | 7.09E-01 | 7.09E+01 |  |  |
| 7915261 | NM_017646    | TRIT1     | tRNA isopentenyltransferase 1         | 0.043  | 1.030 | 8.50E-01 | 8.50E+01 |  |  |
| 7915277 | NM_005376    | MYCL1     | v-myc myelocytomatosis viral onc      | -0.002 | 0.999 | 9.92E-01 | 9.92E+01 |  |  |
| 7915284 | ---          | ---       | ---                                   | -0.129 | 0.915 | 7.20E-01 | 7.20E+01 |  |  |
| 7915286 | NM_000310    | PPT1      | palmitoyl-protein thioesterase 1      | 0.343  | 1.269 | 9.99E-02 | 9.99E+00 |  |  |
| 7915297 | NM_001852    | COL9A2    | collagen, type IX, alpha 2            | 0.013  | 1.009 | 9.35E-01 | 9.35E+01 |  |  |
| 7915329 | ---          | ---       | ---                                   | 0.067  | 1.048 | 6.36E-01 | 6.36E+01 |  |  |
| 7915333 | NM_014747    | RIMS3     | regulating synaptic membrane exc      | -0.037 | 0.974 | 7.87E-01 | 7.87E+01 |  |  |
| 7915345 | NM_00114258  | NFYC      | nuclear transcription factor Y, gamma | -0.083 | 0.944 | 3.97E-01 | 3.97E+01 |  |  |
| 7915347 | NM_133467    | CITED4    | Cbp/p300-interacting transactivat     | -0.099 | 0.933 | 2.46E-01 | 2.46E+01 |  |  |
| 7915351 | NM_144990    | SLFNL1    | schlafen-like 1                       | -0.031 | 0.979 | 8.25E-01 | 8.25E+01 |  |  |
| 7915363 | NM_00103169  | SCMH1     | sex comb on midleg homolog 1 (D       | -0.066 | 0.955 | 6.83E-01 | 6.83E+01 |  |  |

|         |             |           |                                      |        |       |          |          |  |  |
|---------|-------------|-----------|--------------------------------------|--------|-------|----------|----------|--|--|
| 7915385 | NM_001956   | EDN2      | endothelin 2                         | -0.092 | 0.938 | 1.85E-01 | 1.85E+01 |  |  |
| 7915392 | NM_024503   | HIVEP3    | human immunodeficiency virus ty      | 0.145  | 1.106 | 6.89E-02 | 6.89E+00 |  |  |
| 7915404 | NM_033553   | GUCA2A    | guanylate cyclase activator 2A (gu   | -0.077 | 0.948 | 3.22E-01 | 3.22E+01 |  |  |
| 7915408 | NM_014947   | FOXJ3     | forkhead box J3                      | -0.045 | 0.969 | 6.58E-01 | 6.58E+01 |  |  |
| 7915435 | NM_00112339 | CLDN19    | claudin 19                           | -0.019 | 0.987 | 8.96E-01 | 8.96E+01 |  |  |
| 7915444 | NM_022356   | LEPRE1    | leucine proline-enriched proteogly   | -0.067 | 0.955 | 5.99E-01 | 5.99E+01 |  |  |
| 7915466 | ---         | ---       | ---                                  | -0.056 | 0.962 | 7.25E-01 | 7.25E+01 |  |  |
| 7915468 | NM_199342   | CCDC23    | coiled-coil domain containing 23     | 0.194  | 1.144 | 8.96E-02 | 8.96E+00 |  |  |
| 7915472 | NM_006516   | SLC2A1    | solute carrier family 2 (facilitated | -0.134 | 0.911 | 1.26E-01 | 1.26E+01 |  |  |
| 7915485 | NM_006824   | EBNA1BP2  | EBNA1 binding protein 2              | -0.058 | 0.960 | 8.13E-01 | 8.13E+01 |  |  |
| 7915500 | NM_182517   | C1orf210  | chromosome 1 open reading fram       | -0.027 | 0.982 | 8.85E-01 | 8.85E+01 |  |  |
| 7915504 | NM_022821   | ELOVL1    | elongation of very long chain fatty  | 0.122  | 1.089 | 3.89E-01 | 3.89E+01 |  |  |
| 7915516 | NM_201542   | MED8      | mediator complex subunit 8           | 0.125  | 1.091 | 5.51E-01 | 5.51E+01 |  |  |
| 7915529 | NM_031207   | HYI       | hydroxypruvate isomerase homo        | -0.024 | 0.984 | 8.79E-01 | 8.79E+01 |  |  |
| 7915543 | NM_201649   | SLC6A9    | solute carrier family 6 (neurotrans  | -0.043 | 0.970 | 7.09E-01 | 7.09E+01 |  |  |
| 7915563 | ---         | ---       | ---                                  | 0.103  | 1.074 | 6.10E-01 | 6.10E+01 |  |  |
| 7915567 | NM_024066   | ERI3      | exoribonuclease 3                    | 0.101  | 1.072 | 2.37E-01 | 2.37E+01 |  |  |
| 7915578 | NM_024587   | TMEM53    | transmembrane protein 53             | -0.017 | 0.988 | 9.24E-01 | 9.24E+01 |  |  |
| 7915594 | ---         | ---       | ---                                  | 0.021  | 1.015 | 9.44E-01 | 9.44E+01 |  |  |
| 7915614 | NM_003738   | PTCH2     | patched homolog 2 (Drosophila)       | -0.035 | 0.976 | 8.21E-01 | 8.21E+01 |  |  |
| 7915640 | NM_020365   | EIF2B3    | eukaryotic translation initiation fa | 0.161  | 1.118 | 2.35E-01 | 2.35E+01 |  |  |
| 7915659 | NM_024602   | HECTD3    | HECT domain containing 3             | 0.033  | 1.023 | 8.51E-01 | 8.51E+01 |  |  |
| 7915682 | NM_020883   | ZSWIM5    | zinc finger, SWIM-type containing    | 0.026  | 1.018 | 8.16E-01 | 8.16E+01 |  |  |
| 7915695 | NM_012222   | MUTYH     | mutY homolog (E. coli)               | -0.088 | 0.941 | 2.72E-01 | 2.72E+01 |  |  |
| 7915718 | NM_007170   | TESK2     | testis-specific kinase 2             | 0.086  | 1.062 | 6.44E-01 | 6.44E+01 |  |  |
| 7915733 | NM_002574   | PRDX1     | peroxiredoxin 1                      | 0.318  | 1.247 | 1.42E-02 | 1.42E+00 |  |  |
| 7915743 | NM_00111493 | CCDC17    | coiled-coil domain containing 17     | -0.010 | 0.993 | 9.56E-01 | 9.56E+01 |  |  |
| 7915758 | NM_021639   | GPBP1L1   | GC-rich promoter binding protein     | -0.031 | 0.979 | 7.99E-01 | 7.99E+01 |  |  |
| 7915787 | NM_003629   | PIK3R3    | phosphoinositide-3-kinase, regula    | -0.159 | 0.895 | 4.62E-01 | 4.62E+01 |  |  |
| 7915801 | NM_017739   | POMGNT1   | protein O-linked mannose beta1,2     | -0.015 | 0.990 | 9.44E-01 | 9.44E+01 |  |  |
| 7915827 | NM_006369   | LRRCC1    | leucine rich repeat containing 41    | -0.031 | 0.979 | 7.84E-01 | 7.84E+01 |  |  |
| 7915841 | NM_00109761 | KNCN      | kinoclin                             | -0.020 | 0.987 | 8.79E-01 | 8.79E+01 |  |  |
| 7915846 | NM_003684   | MKNK1     | MAP kinase interacting serine/thr    | 0.316  | 1.245 | 7.49E-03 | 7.49E-01 |  |  |
| 7915861 | NM_145279   | MOBK1L2C  | MOB1, Mps One Binder kinase act      | 0.153  | 1.112 | 1.35E-01 | 1.35E+01 |  |  |
| 7915870 | NM_022745   | ATPAF1    | ATP synthase mitochondrial F1 co     | 0.071  | 1.050 | 6.81E-01 | 6.81E+01 |  |  |
| 7915882 | NM_014774   | KIAA0494  | KIAA0494                             | 0.017  | 1.012 | 8.91E-01 | 8.91E+01 |  |  |
| 7915910 | NM_005764   | PDZK1IP1  | PDZK1 interacting protein 1          | -0.047 | 0.968 | 6.00E-01 | 6.00E+01 |  |  |
| 7915949 | AK090467    | LOC284542 | hypothetical protein LOC284542       | 0.005  | 1.003 | 9.81E-01 | 9.81E+01 |  |  |
| 7915991 | NM_032110   | DMRTA2    | DMRT-like family A2                  | -0.061 | 0.959 | 5.38E-01 | 5.38E+01 |  |  |
| 7915995 | NM_007051   | FAF1      | Fas (TNFRSF6) associated factor 1    | 0.043  | 1.030 | 8.06E-01 | 8.06E+01 |  |  |
| 7916022 | ---         | ---       | ---                                  | -0.040 | 0.972 | 7.08E-01 | 7.08E+01 |  |  |
| 7916045 | NM_001981   | EPS15     | epidermal growth factor receptor     | 0.012  | 1.008 | 9.49E-01 | 9.49E+01 |  |  |
| 7916077 | NM_002525   | NRD1      | nardilysin (N-arginine dibasic con   | 0.010  | 1.007 | 9.63E-01 | 9.63E+01 |  |  |
| 7916120 | NM_015913   | TXNDC12   | thioredoxin domain containing 12     | 0.179  | 1.132 | 1.88E-01 | 1.88E+01 |  |  |
| 7916130 | NM_138417   | KTI12     | KTI12 homolog, chromatin associa     | -0.081 | 0.945 | 4.58E-01 | 4.58E+01 |  |  |
| 7916135 | NM_032449   | CC2D1B    | coiled-coil and C2 domain contain    | -0.052 | 0.964 | 6.09E-01 | 6.09E+01 |  |  |
| 7916185 | NM_00100988 | ZCCHC11   | zinc finger, CCHC domain containi    | -0.059 | 0.960 | 6.55E-01 | 6.55E+01 |  |  |
| 7916219 | BC015313    | C1orf163  | chromosome 1 open reading fram       | 0.196  | 1.146 | 7.64E-02 | 7.64E+00 |  |  |
| 7916225 | ---         | ---       | ---                                  | -0.007 | 0.995 | 9.83E-01 | 9.83E+01 |  |  |
| 7916229 | NM_018281   | ECHDC2    | enoyl Coenzyme A hydratase dom       | -0.040 | 0.973 | 7.55E-01 | 7.55E+01 |  |  |
| 7916246 | ---         | ---       | ---                                  | 0.155  | 1.113 | 3.02E-01 | 3.02E+01 |  |  |
| 7916262 | BC010908    | C1orf123  | chromosome 1 open reading fram       | 0.015  | 1.011 | 9.33E-01 | 9.33E+01 |  |  |
| 7916274 | NM_002370   | MAGOH     | mago-nashi homolog, proliferation    | -0.014 | 0.990 | 9.56E-01 | 9.56E+01 |  |  |
| 7916282 | NM_004631   | LRP8      | low density lipoprotein receptor-r   | -0.150 | 0.901 | 9.45E-02 | 9.45E+00 |  |  |
| 7916304 | NM_147193   | GLIS1     | GLIS family zinc finger 1            | -0.105 | 0.929 | 1.89E-01 | 1.89E+01 |  |  |
| 7916316 | NM_018087   | TMEM48    | transmembrane protein 48             | 0.039  | 1.027 | 8.41E-01 | 8.41E+01 |  |  |
| 7916343 | NM_018982   | YIPF1     | Yip1 domain family, member 1         | 0.089  | 1.064 | 5.48E-01 | 5.48E+01 |  |  |
| 7916356 | NM_016126   | HSPB11    | heat shock protein family B (small   | 0.034  | 1.024 | 9.13E-01 | 9.13E+01 |  |  |
| 7916364 | NM_00101097 | LDLRAD1   | low density lipoprotein receptor c   | 0.022  | 1.015 | 8.59E-01 | 8.59E+01 |  |  |
| 7916372 | NM_004872   | TMEM59    | transmembrane protein 59             | 0.078  | 1.056 | 4.06E-01 | 4.06E+01 |  |  |
| 7916393 | NM_00103167 | CYB5RL    | cytochrome b5 reductase-like         | 0.134  | 1.097 | 3.47E-02 | 3.47E+00 |  |  |
| 7916403 | NM_145716   | SSBP3     | single stranded DNA binding prote    | -0.093 | 0.937 | 5.72E-01 | 5.72E+01 |  |  |
| 7916412 | NM_147161   | ACOT11    | acyl-CoA thioesterase 11             | -0.002 | 0.998 | 9.89E-01 | 9.89E+01 |  |  |
| 7916422 | NM_152268   | PARS2     | prolyl-tRNA synthetase 2, mitoch     | -0.084 | 0.943 | 7.94E-02 | 7.94E+00 |  |  |
| 7916425 | NM_017904   | TTC22     | tetratricopeptide repeat domain 2    | -0.057 | 0.961 | 7.02E-01 | 7.02E+01 |  |  |
| 7916432 | NM_014762   | DHCR24    | 24-dehydrocholesterol reductase      | 0.014  | 1.009 | 9.55E-01 | 9.55E+01 |  |  |
| 7916443 | NM_015306   | USP24     | ubiquitin specific peptidase 24      | 0.025  | 1.018 | 8.16E-01 | 8.16E+01 |  |  |
| 7916489 | ---         | ---       | ---                                  | -0.006 | 0.996 | 9.76E-01 | 9.76E+01 |  |  |
| 7916493 | NM_003713   | PPAP2B    | phosphatidic acid phosphatase typ    | 0.026  | 1.018 | 8.56E-01 | 8.56E+01 |  |  |
| 7916562 | NM_002136   | HNRNPA1   | heterogeneous nuclear ribonucle      | -0.023 | 0.984 | 8.78E-01 | 8.78E+01 |  |  |
| 7916564 | ---         | ---       | ---                                  | -0.025 | 0.983 | 9.50E-01 | 9.50E+01 |  |  |
| 7916568 | AF263547    | DAB1      | disabled homolog 1 (Drosophila)      | 0.029  | 1.020 | 9.29E-01 | 9.29E+01 |  |  |
| 7916570 | NM_145243   | OMA1      | OMA1 homolog, zinc metalloprotei     | 0.127  | 1.092 | 5.55E-01 | 5.55E+01 |  |  |
| 7916590 | NM_001625   | AK2       | adenylate kinase 2                   | 0.115  | 1.083 | 3.05E-01 | 3.05E+01 |  |  |
| 7916592 | NM_00108548 | MYSM1     | Myb-like, SWIRM and MPN domai        | 0.042  | 1.029 | 7.44E-01 | 7.44E+01 |  |  |
| 7916609 | NM_002228   | JUN       | jun oncogene                         | -0.248 | 0.842 | 3.80E-02 | 3.80E+00 |  |  |
| 7916643 | NM_032027   | TM2D1     | TM2 domain containing 1              | -0.038 | 0.974 | 8.17E-01 | 8.17E+01 |  |  |

|         |                  |              |                                     |        |       |          |          |  |
|---------|------------------|--------------|-------------------------------------|--------|-------|----------|----------|--|
| 7916654 | NM_181712        | KANK4        | KN motif and ankyrin repeat doma    | -0.009 | 0.994 | 9.56E-01 | 9.56E+01 |  |
| 7916667 | ---              | ---          | ---                                 | 0.161  | 1.118 | 2.65E-01 | 2.65E+01 |  |
| 7916727 | NM_014288        | ITGB3BP      | integrin beta 3 binding protein (be | 0.024  | 1.017 | 9.47E-01 | 9.47E+01 |  |
| 7916743 | ---              | ---          | ---                                 | 0.070  | 1.050 | 6.15E-01 | 6.15E+01 |  |
| 7916747 | NM_002227        | JAK1         | Janus kinase 1                      | -0.006 | 0.996 | 9.75E-01 | 9.75E+01 |  |
| 7916808 | NM_015139        | SLC35D1      | solute carrier family 35 (UDP-gluc  | 0.003  | 1.002 | 9.93E-01 | 9.93E+01 |  |
| 7916836 | NM_00101806      | SERBP1       | SERPINE1 mRNA binding protein 1     | 0.179  | 1.132 | 3.90E-02 | 3.90E+00 |  |
| 7916928 | NM_030816        | ANKRD13C     | ankyrin repeat domain 13C           | -0.015 | 0.990 | 9.30E-01 | 9.30E+01 |  |
| 7916969 | NM_005455        | ZRANB2       | zinc finger, RAN-binding domain c   | 0.009  | 1.006 | 9.52E-01 | 9.52E+01 |  |
| 7917000 | ---              | ---          | ---                                 | 0.047  | 1.033 | 6.37E-01 | 6.37E+01 |  |
| 7917037 | NM_00113004      | CRYZ         | crystallin, zeta (quinone reductase | -0.080 | 0.946 | 8.06E-01 | 8.06E+01 |  |
| 7917080 | S72422 // S72423 | DLSTP        | dihydropolipoamide S-succinyltransf | -0.015 | 0.989 | 9.60E-01 | 9.60E+01 |  |
| 7917088 | NM_005482        | PIGK         | phosphatidylinositol glycan ancho   | 0.043  | 1.030 | 8.34E-01 | 8.34E+01 |  |
| 7917103 | NM_015534        | ZZZ3         | zinc finger, ZZ-type containing 3   | -0.064 | 0.956 | 7.15E-01 | 7.15E+01 |  |
| 7917120 | NM_015017        | USP33        | ubiquitin specific peptidase 33     | 0.025  | 1.018 | 8.91E-01 | 8.91E+01 |  |
| 7917148 | NM_022831        | AIDA         | axin interactor, dorsalization asso | 0.002  | 1.001 | 9.91E-01 | 9.91E+01 |  |
| 7917151 | ENST00000334     | NEXN         | nexilin (F actin binding protein)   | -0.088 | 0.941 | 2.41E-01 | 2.41E+01 |  |
| 7917156 | NM_003902        | FUBP1        | far upstream element (FUSE) bind    | 0.036  | 1.025 | 7.01E-01 | 7.01E+01 |  |
| 7917232 | NM_005274        | GNF5         | guanine nucleotide binding protei   | 0.123  | 1.089 | 2.23E-01 | 2.23E+01 |  |
| 7917240 | NM_004388        | CTBS         | chitobiase, di-N-acetyl-            | 0.127  | 1.092 | 2.78E-01 | 2.78E+01 |  |
| 7917283 | NM_153259        | MCOLN2       | mucolipin 2                         | -0.213 | 0.863 | 5.26E-01 | 5.26E+01 |  |
| 7917331 | NR_024113        | C1orf52      | chromosome 1 open reading fram      | -0.037 | 0.975 | 8.53E-01 | 8.53E+01 |  |
| 7917338 | NM_003921        | BCL10        | B-cell CLL/lymphoma 10              | 0.081  | 1.058 | 5.53E-01 | 5.53E+01 |  |
| 7917359 | NM_017953        | ZNHI6        | zinc finger, HIT type 6             | 0.071  | 1.050 | 7.54E-01 | 7.54E+01 |  |
| 7917433 | NM_020729        | ODF2L        | outer dense fiber of sperm tails 2- | -0.081 | 0.945 | 6.82E-01 | 6.82E+01 |  |
| 7917455 | NM_004261        | 40436        | 15 kDa selenoprotein                | 0.063  | 1.044 | 4.60E-01 | 4.60E+01 |  |
| 7917466 | NR_026988        | LOC339524    | hypothetical LOC339524              | 0.005  | 1.004 | 9.80E-01 | 9.80E+01 |  |
| 7917468 | ---              | ---          | ---                                 | -0.208 | 0.866 | 4.81E-01 | 4.81E+01 |  |
| 7917470 | ---              | ---          | ---                                 | -0.051 | 0.965 | 6.93E-01 | 6.93E+01 |  |
| 7917472 | NM_001514        | GTF2B        | general transcription factor IIB    | 0.036  | 1.025 | 8.64E-01 | 8.64E+01 |  |
| 7917482 | NM_00100866      | CCBL2        | cysteine conjugate-beta lyase 2     | -0.005 | 0.996 | 9.81E-01 | 9.81E+01 |  |
| 7917503 | NM_018284        | GBP3         | guanylate binding protein 3         | -0.015 | 0.989 | 9.64E-01 | 9.64E+01 |  |
| 7917516 | NM_002053        | GBP1         | guanylate binding protein 1, interf | 0.474  | 1.389 | 8.43E-02 | 8.43E+00 |  |
| 7917528 | ---              | ---          | ---                                 | 0.172  | 1.126 | 4.04E-01 | 4.04E+01 |  |
| 7917530 | ---              | ---          | ---                                 | 0.081  | 1.057 | 7.00E-01 | 7.00E+01 |  |
| 7917532 | NM_004120        | GBP2         | guanylate binding protein 2, interf | 0.087  | 1.062 | 5.34E-01 | 5.34E+01 |  |
| 7917561 | NM_052941        | GBP4         | guanylate binding protein 4         | 0.216  | 1.162 | 3.41E-01 | 3.41E+01 |  |
| 7917576 | NM_052942        | GBP5         | guanylate binding protein 5         | 0.276  | 1.211 | 3.83E-01 | 3.83E+01 |  |
| 7917591 | ---              | ---          | ---                                 | 0.009  | 1.006 | 9.81E-01 | 9.81E+01 |  |
| 7917599 | NM_020063        | BARHL2       | BarH-like homeobox 2                | 0.009  | 1.006 | 9.57E-01 | 9.57E+01 |  |
| 7917604 | NM_021269        | ZNF644       | zinc finger protein 644             | 0.016  | 1.011 | 9.39E-01 | 9.39E+01 |  |
| 7917645 | NR_003287        | LOC100008589 | 28S ribosomal RNA                   | 0.015  | 1.011 | 9.16E-01 | 9.16E+01 |  |
| 7917649 | NM_003243        | TGFBR3       | transforming growth factor, beta 3  | -0.099 | 0.934 | 8.05E-01 | 8.05E+01 |  |
| 7917670 | ---              | ---          | ---                                 | -0.030 | 0.980 | 8.63E-01 | 8.63E+01 |  |
| 7917672 | ---              | ---          | ---                                 | 0.035  | 1.025 | 8.23E-01 | 8.23E+01 |  |
| 7917674 | NM_00112282      | SET          | SET nuclear oncogene                | -0.026 | 0.982 | 8.93E-01 | 8.93E+01 |  |
| 7917697 | NM_005263        | GFI1         | growth factor independent 1 trans   | -0.018 | 0.988 | 9.12E-01 | 9.12E+01 |  |
| 7917707 | NM_005665        | EVI5         | ecotropic viral integration site 5  | 0.323  | 1.251 | 2.71E-01 | 2.71E+01 |  |
| 7917737 | ---              | ---          | ---                                 | -0.038 | 0.974 | 8.16E-01 | 8.16E+01 |  |
| 7917741 | NM_016040        | TMED5        | transmembrane emp24 protein tr      | 0.059  | 1.042 | 6.83E-01 | 6.83E+01 |  |
| 7917752 | ---              | ---          | ---                                 | -0.016 | 0.989 | 9.49E-01 | 9.49E+01 |  |
| 7917754 | NM_003567        | BCAR3        | breast cancer anti-estrogen resista | -0.065 | 0.956 | 7.10E-01 | 7.10E+01 |  |
| 7917771 | NM_014597        | DNTTIP2      | deoxynucleotidyltransferase, term   | -0.110 | 0.926 | 2.64E-01 | 2.64E+01 |  |
| 7917875 | NM_001993        | F3           | coagulation factor III (thromboplas | -0.346 | 0.787 | 5.45E-02 | 5.45E+00 |  |
| 7917885 | NM_001839        | CNN3         | calponin 3, acidic                  | 0.111  | 1.080 | 5.71E-01 | 5.71E+01 |  |
| 7917906 | NM_000971        | RPL7         | ribosomal protein L7                | -0.028 | 0.981 | 8.63E-01 | 8.63E+01 |  |
| 7917912 | NM_000110        | DPYD         | dihydropyrimidine dehydrogenase     | 0.312  | 1.241 | 4.32E-02 | 4.32E+00 |  |
| 7917974 | ---              | ---          | ---                                 | 0.417  | 1.335 | 2.81E-01 | 2.81E+01 |  |
| 7918034 | NM_00107739      | DPH5         | DPH5 homolog (S. cerevisiae)        | 0.012  | 1.008 | 9.70E-01 | 9.70E+01 |  |
| 7918048 | ---              | ---          | ---                                 | -0.011 | 0.993 | 9.89E-01 | 9.89E+01 |  |
| 7918050 | NM_002295        | RPSA         | ribosomal protein SA                | -0.048 | 0.968 | 8.05E-01 | 8.05E+01 |  |
| 7918134 | NM_004038        | AMY1A        | amylase, alpha 1A (salivary)        | 0.070  | 1.049 | 8.13E-01 | 8.13E+01 |  |
| 7918149 | ---              | ---          | ---                                 | -0.028 | 0.981 | 8.91E-01 | 8.91E+01 |  |
| 7918153 | ---              | ---          | ---                                 | -0.041 | 0.972 | 6.96E-01 | 6.96E+01 |  |
| 7918157 | NM_006113        | VAV3         | vav 3 guanine nucleotide exchange   | 0.291  | 1.223 | 2.88E-01 | 2.88E+01 |  |
| 7918188 | NM_013386        | SLC25A24     | solute carrier family 25 (mitochon  | 0.177  | 1.131 | 4.82E-01 | 4.82E+01 |  |
| 7918203 | NM_00114398      | NBPF4        | neuroblastoma breakpoint family,    | 0.028  | 1.020 | 7.94E-01 | 7.94E+01 |  |
| 7918223 | NM_144584        | C1orf59      | chromosome 1 open reading fram      | 0.092  | 1.066 | 6.00E-01 | 6.00E+01 |  |
| 7918255 | NM_00104821      | CLCC1        | chloride channel CLIC-like 1        | 0.176  | 1.129 | 2.78E-01 | 2.78E+01 |  |
| 7918275 | NM_00114255      | WDR47        | WD repeat domain 47                 | -0.120 | 0.920 | 5.29E-01 | 5.29E+01 |  |
| 7918284 | NM_005645        | TAF13        | TAF13 RNA polymerase II, TATA bo    | 0.042  | 1.030 | 8.62E-01 | 8.62E+01 |  |
| 7918294 | NM_00112296      | C1orf194     | chromosome 1 open reading fram      | 0.041  | 1.029 | 7.64E-01 | 7.64E+01 |  |
| 7918300 | NM_00103229      | PSRC1        | proline/serine-rich coiled-coil 1   | -0.034 | 0.977 | 7.45E-01 | 7.45E+01 |  |
| 7918323 | NM_002959        | SORT1        | sortilin 1                          | 0.525  | 1.439 | 5.36E-02 | 5.36E+00 |  |
| 7918345 | NM_002790        | PSMA5        | proteasome (prosome, macropain      | 0.044  | 1.031 | 8.06E-01 | 8.06E+01 |  |
| 7918359 | NM_020703        | AMIGO1       | adhesion molecule with Ig-like do   | 0.014  | 1.010 | 9.37E-01 | 9.37E+01 |  |
| 7918365 | ---              | ---          | ---                                 | 0.108  | 1.078 | 7.44E-01 | 7.44E+01 |  |

|         |                                |              |                                      |        |       |          |          |  |  |
|---------|--------------------------------|--------------|--------------------------------------|--------|-------|----------|----------|--|--|
| 7918367 | NM_005272                      | GNAT2        | guanine nucleotide binding protein   | 0.071  | 1.050 | 4.96E-01 | 4.96E+01 |  |  |
| 7918394 | NM_139053                      | EPS8L3       | EPS8-like 3                          | -0.002 | 0.999 | 9.87E-01 | 9.87E+01 |  |  |
| 7918416 | NM_006492                      | ALX3         | ALX homeobox 3                       | -0.071 | 0.952 | 4.14E-01 | 4.14E+01 |  |  |
| 7918424 | ---                            | ---          | ---                                  | 0.171  | 1.125 | 3.99E-01 | 3.99E+01 |  |  |
| 7918426 | NM_004696                      | SLC16A4      | solute carrier family 16, member 4   | 0.173  | 1.127 | 1.54E-01 | 1.54E+01 |  |  |
| 7918437 | NM_006402                      | HBXIP        | hepatitis B virus x interacting prot | 0.144  | 1.105 | 5.88E-02 | 5.88E+00 |  |  |
| 7918444 | NM_005549                      | KCNA10       | potassium voltage-gated channel,     | 0.000  | 1.000 | 1.00E+00 | 1.00E+02 |  |  |
| 7918457 | NM_002232                      | KCNA3        | potassium voltage-gated channel,     | 0.062  | 1.044 | 6.54E-01 | 6.54E+01 |  |  |
| 7918487 | NM_024901                      | DENND2D      | DENN/MADD domain containing 2        | 0.158  | 1.116 | 1.25E-01 | 1.25E+01 |  |  |
| 7918517 | NM_024102                      | WDR77        | WD repeat domain 77                  | 0.116  | 1.084 | 3.03E-01 | 3.03E+01 |  |  |
| 7918550 | ---                            | ---          | ---                                  | 0.191  | 1.142 | 2.39E-01 | 2.39E+01 |  |  |
| 7918552 | NM_019099                      | C1orf183     | chromosome 1 open reading fram       | 0.000  | 1.000 | 1.00E+00 | 1.00E+02 |  |  |
| 7918569 | NM_017744                      | ST7L         | suppression of tumorigenicity 7 lik  | 0.049  | 1.035 | 7.36E-01 | 7.36E+01 |  |  |
| 7918593 | NM_175744                      | RHOC         | ras homolog gene family, member      | 0.009  | 1.006 | 9.68E-01 | 9.68E+01 |  |  |
| 7918606 | NM_005167                      | PPM1J        | protein phosphatase 1J (PP2C dom     | 0.011  | 1.008 | 9.45E-01 | 9.45E+01 |  |  |
| 7918620 | AK093435                       | FLJ36116     | hypothetical locus LOC388666         | -0.041 | 0.972 | 9.07E-01 | 9.07E+01 |  |  |
| 7918634 | NM_006608                      | PHTF1        | putative homeodomain transcript      | -0.148 | 0.903 | 2.91E-01 | 2.91E+01 |  |  |
| 7918657 | NM_015967                      | PTPN22       | protein tyrosine phosphatase, nor    | 0.032  | 1.023 | 9.36E-01 | 9.36E+01 |  |  |
| 7918681 | NM_018364                      | RSBN1        | round spermatid basic protein 1      | -0.068 | 0.954 | 6.63E-01 | 6.63E+01 |  |  |
| 7918703 | NM_006594                      | AP4B1        | adaptor-related protein complex 4    | -0.006 | 0.996 | 9.78E-01 | 9.78E+01 |  |  |
| 7918725 | NM_015906                      | TRIM33       | tripartite motif-containing 33       | -0.004 | 0.997 | 9.81E-01 | 9.81E+01 |  |  |
| 7918749 | BC063894                       | DENND2C      | DENN/MADD domain containing 2        | 0.003  | 1.002 | 9.86E-01 | 9.86E+01 |  |  |
| 7918755 | BC063894                       | DENND2C      | DENN/MADD domain containing 2        | -0.264 | 0.833 | 4.70E-01 | 4.70E+01 |  |  |
| 7918759 | NM_005872                      | BCAS2        | breast carcinoma amplified seque     | -0.050 | 0.966 | 8.05E-01 | 8.05E+01 |  |  |
| 7918792 | BC063894                       | DENND2C      | DENN/MADD domain containing 2        | 0.020  | 1.014 | 8.93E-01 | 8.93E+01 |  |  |
| 7918813 | NM_002524                      | NRAS         | neuroblastoma RAS viral (v-ras) or   | -0.019 | 0.987 | 9.43E-01 | 9.43E+01 |  |  |
| 7918825 | NM_00100755                    | CSDE1        | cold shock domain containing E1,     | 0.017  | 1.012 | 8.57E-01 | 8.57E+01 |  |  |
| 7918847 | NM_00110239                    | SIKE1        | suppressor of IKKBE 1                | 0.043  | 1.031 | 8.26E-01 | 8.26E+01 |  |  |
| 7918869 | NM_002506                      | NGF          | nerve growth factor (beta polypep    | -0.033 | 0.978 | 7.75E-01 | 7.75E+01 |  |  |
| 7918876 | ---                            | ---          | ---                                  | -0.041 | 0.972 | 8.05E-01 | 8.05E+01 |  |  |
| 7918900 | ---                            | ---          | ---                                  | -0.064 | 0.957 | 9.04E-01 | 9.04E+01 |  |  |
| 7918911 | ---                            | ---          | ---                                  | -0.105 | 0.930 | 3.90E-01 | 3.90E+01 |  |  |
| 7918913 | NM_001542                      | IGSF3        | immunoglobulin superfamily, men      | -0.045 | 0.970 | 6.82E-01 | 6.82E+01 |  |  |
| 7918925 | NM_025188                      | TRIM45       | tripartite motif-containing 45       | -0.073 | 0.950 | 4.51E-01 | 4.51E+01 |  |  |
| 7918936 | NM_024626                      | VTCN1        | V-set domain containing T cell acti  | -0.011 | 0.992 | 9.53E-01 | 9.53E+01 |  |  |
| 7918955 | NM_00113558                    | GDA2P        | ganglioside induced differentiatio   | 0.069  | 1.049 | 5.55E-01 | 5.55E+01 |  |  |
| 7919038 | NM_201263                      | WARS2        | tryptophanyl tRNA synthetase 2, r    | -0.059 | 0.960 | 7.54E-01 | 7.54E+01 |  |  |
| 7919051 | NM_00108047                    | ZNF697       | zinc finger protein 697              | 0.012  | 1.009 | 9.56E-01 | 9.56E+01 |  |  |
| 7919095 | NM_024408                      | NOTCH2       | Notch homolog 2 (Drosophila)         | 0.106  | 1.076 | 6.33E-01 | 6.33E+01 |  |  |
| 7919129 | ---                            | ---          | ---                                  | 0.076  | 1.054 | 7.61E-01 | 7.61E+01 |  |  |
| 7919131 | ---                            | ---          | ---                                  | 0.207  | 1.154 | 1.57E-01 | 1.57E+01 |  |  |
| 7919153 | ---                            | ---          | ---                                  | -0.110 | 0.926 | 9.61E-01 | 9.61E+01 |  |  |
| 7919157 | NM_00114388                    | PPIAL4B      | peptidylprolyl isomerase A (cyclo    | -0.017 | 0.988 | 9.01E-01 | 9.01E+01 |  |  |
| 7919160 | ---                            | ---          | ---                                  | -0.317 | 0.803 | 8.70E-02 | 8.70E+00 |  |  |
| 7919162 | NM_00114388                    | PPIAL4B      | peptidylprolyl isomerase A (cyclo    | 0.032  | 1.022 | 8.41E-01 | 8.41E+01 |  |  |
| 7919166 | ---                            | ---          | ---                                  | -0.317 | 0.803 | 8.70E-02 | 8.70E+00 |  |  |
| 7919168 | NM_022359                      | PDE4DIP      | phosphodiesterase 4D interacting     | -0.127 | 0.916 | 5.69E-01 | 5.69E+01 |  |  |
| 7919193 | NR_002212                      | NUDT4P1      | nudix (nucleoside diphosphate link   | 0.070  | 1.050 | 6.20E-01 | 6.20E+01 |  |  |
| 7919197 | NM_032305                      | POLR3GL      | polymerase (RNA) III (DNA directe    | 0.019  | 1.014 | 9.41E-01 | 9.41E+01 |  |  |
| 7919208 | NR_002328                      | GNRHR2       | gonadotropin-releasing hormone       | 0.010  | 1.007 | 9.63E-01 | 9.63E+01 |  |  |
| 7919217 | NM_00101275                    | NUDT17       | nudix (nucleoside diphosphate link   | -0.015 | 0.990 | 9.27E-01 | 9.27E+01 |  |  |
| 7919226 | NM_006468                      | POLR3C       | polymerase (RNA) III (DNA directe    | 0.101  | 1.072 | 4.75E-01 | 4.75E+01 |  |  |
| 7919251 | NM_016334                      | GPR89B       | G protein-coupled receptor 89B       | 0.010  | 1.007 | 9.67E-01 | 9.67E+01 |  |  |
| 7919267 | ---                            | ---          | ---                                  | -0.016 | 0.989 | 9.36E-01 | 9.36E+01 |  |  |
| 7919271 | NM_183372                      | RP11-94I2.2  | neuroblastoma breakpoint family,     | -0.056 | 0.962 | 5.04E-01 | 5.04E+01 |  |  |
| 7919299 | AK128227                       | LOC100130236 | hypothetical LOC100130236            | 0.007  | 1.005 | 9.78E-01 | 9.78E+01 |  |  |
| 7919301 | AK128227                       | LOC100130236 | hypothetical LOC100130236            | -0.026 | 0.982 | 8.75E-01 | 8.75E+01 |  |  |
| 7919305 | NM_005399                      | PRKAB2       | protein kinase, AMP-activated, be    | -0.169 | 0.889 | 5.64E-02 | 5.64E+00 |  |  |
| 7919314 | NM_001461                      | FMO5         | flavin containing monooxygenase      | 0.092  | 1.066 | 6.31E-01 | 6.31E+01 |  |  |
| 7919326 | NM_016361                      | ACP6         | acid phosphatase 6, lysophosphat     | 0.003  | 1.002 | 9.89E-01 | 9.89E+01 |  |  |
| 7919347 | ---                            | ---          | ---                                  | -0.016 | 0.989 | 9.36E-01 | 9.36E+01 |  |  |
| 7919351 | NM_183372                      | RP11-94I2.2  | neuroblastoma breakpoint family,     | -0.054 | 0.964 | 5.29E-01 | 5.29E+01 |  |  |
| 7919380 | AK128227                       | LOC100130236 | hypothetical LOC100130236            | 0.007  | 1.005 | 9.78E-01 | 9.78E+01 |  |  |
| 7919384 | ---                            | ---          | ---                                  | -0.020 | 0.986 | 9.49E-01 | 9.49E+01 |  |  |
| 7919386 | ---                            | ---          | ---                                  | -0.121 | 0.920 | 3.55E-01 | 3.55E+01 |  |  |
| 7919394 | NR_024510                      | LOC728855    | hypothetical LOC728855               | -0.021 | 0.985 | 9.50E-01 | 9.50E+01 |  |  |
| 7919403 | ---                            | ---          | ---                                  | -0.110 | 0.926 | 9.61E-01 | 9.61E+01 |  |  |
| 7919407 | NM_00114388                    | PPIAL4B      | peptidylprolyl isomerase A (cyclo    | 0.040  | 1.028 | 7.75E-01 | 7.75E+01 |  |  |
| 7919412 | NM_00110266                    | NBPF16       | neuroblastoma breakpoint family,     | -0.047 | 0.968 | 5.78E-01 | 5.78E+01 |  |  |
| 7919436 | NM_178230                      | PPIAL4A      | peptidylprolyl isomerase A (cyclo    | -0.057 | 0.962 | 4.75E-01 | 4.75E+01 |  |  |
| 7919438 | NM_00110266                    | NBPF16       | neuroblastoma breakpoint family,     | -0.052 | 0.965 | 5.42E-01 | 5.42E+01 |  |  |
| 7919560 | ---                            | ---          | ---                                  | -0.506 | 0.704 | 5.71E-02 | 5.71E+00 |  |  |
| 7919564 | ---                            | ---          | ---                                  | 0.048  | 1.034 | 6.60E-01 | 6.60E+01 |  |  |
| 7919566 | ---                            | ---          | ---                                  | -0.008 | 0.994 | 9.65E-01 | 9.65E+01 |  |  |
| 7919568 | ---                            | ---          | ---                                  | -0.063 | 0.958 | 7.63E-01 | 7.63E+01 |  |  |
| 7919578 | ---                            | ---          | ---                                  | -0.080 | 0.946 | 8.70E-01 | 8.70E+01 |  |  |
| 7919580 | AK125737 // #0570 // LOC440570 | LOC440570    | hypothetical LOC440570 // hypot      | 0.074  | 1.053 | 7.54E-01 | 7.54E+01 |  |  |



|         |                           |              |                                      |        |       |          |          |  |
|---------|---------------------------|--------------|--------------------------------------|--------|-------|----------|----------|--|
| 7919582 | XR_039086                 | LOC100133075 | hypothetical LOC100133075            | -0.079 | 0.947 | 4.34E-01 | 4.34E+01 |  |
| 7919584 | NM_00102459               | HIST2H2BF    | histone cluster 2, H2bf              | -0.029 | 0.980 | 9.24E-01 | 9.24E+01 |  |
| 7919589 | NM_00112337               | HIST2H3D     | histone cluster 2, H3d               | -0.018 | 0.987 | 9.12E-01 | 9.12E+01 |  |
| 7919596 | AK125737 // #0570 // LOC4 |              | hypothetical LOC440570 // hypot      | 0.074  | 1.053 | 7.54E-01 | 7.54E+01 |  |
| 7919598 | ---                       | ---          | ---                                  | -0.158 | 0.896 | 3.90E-01 | 3.90E+01 |  |
| 7919600 | ---                       | ---          | ---                                  | -0.051 | 0.966 | 8.63E-01 | 8.63E+01 |  |
| 7919604 | AK092418                  | HIST2H2BF    | histone cluster 2, H2bf              | 0.062  | 1.044 | 6.76E-01 | 6.76E+01 |  |
| 7919606 | NM_00102459               | HIST2H2BF    | histone cluster 2, H2bf              | -0.038 | 0.974 | 8.76E-01 | 8.76E+01 |  |
| 7919612 | NM_00112337               | HIST2H3D     | histone cluster 2, H3d               | -0.042 | 0.971 | 7.59E-01 | 7.59E+01 |  |
| 7919614 | NM_00100546               | HIST2H3A     | histone cluster 2, H3a               | -0.052 | 0.965 | 6.82E-01 | 6.82E+01 |  |
| 7919619 | NM_003516                 | HIST2H2AA3   | histone cluster 2, H2aa3             | -0.194 | 0.874 | 2.82E-01 | 2.82E+01 |  |
| 7919625 | NM_003528 ///             | HIST2H2BE    | histone cluster 2, H2be // histone   | 0.045  | 1.031 | 7.39E-01 | 7.39E+01 |  |
| 7919627 | NM_003548                 | HIST2H4A     | histone cluster 2, H4a               | -0.111 | 0.926 | 6.16E-01 | 6.16E+01 |  |
| 7919637 | NM_003528                 | HIST2H2BE    | histone cluster 2, H2be              | -0.016 | 0.989 | 9.67E-01 | 9.67E+01 |  |
| 7919642 | NM_175065                 | HIST2H2AB    | histone cluster 2, H2ab              | 0.016  | 1.011 | 9.64E-01 | 9.64E+01 |  |
| 7919659 | NM_005850                 | SF3B4        | splicing factor 3b, subunit 4, 49kDa | -0.050 | 0.966 | 5.63E-01 | 5.63E+01 |  |
| 7919669 | NM_00114586               | MTMR11       | myotubularin related protein 11      | -0.090 | 0.939 | 2.06E-01 | 2.06E+01 |  |
| 7919715 | NM_030920                 | ANP32E       | acidic (leucine-rich) nuclear phosph | -0.048 | 0.967 | 7.14E-01 | 7.14E+01 |  |
| 7919729 | NM_016022                 | APH1A        | anterior pharynx defective 1 hom     | 0.110  | 1.079 | 5.04E-01 | 5.04E+01 |  |
| 7919743 | NM_019032                 | ADAMTSL4     | ADAMTS-like 4                        | 0.067  | 1.048 | 7.15E-01 | 7.15E+01 |  |
| 7919747 | ---                       | ---          | ---                                  | -0.010 | 0.993 | 9.85E-01 | 9.85E+01 |  |
| 7919749 | ---                       | ---          | ---                                  | -0.049 | 0.967 | 9.24E-01 | 9.24E+01 |  |
| 7919751 | NM_021960                 | MCL1         | myeloid cell leukemia sequence 1     | -0.034 | 0.977 | 7.60E-01 | 7.60E+01 |  |
| 7919761 | ---                       | ---          | ---                                  | -0.013 | 0.991 | 9.80E-01 | 9.80E+01 |  |
| 7919763 | NM_207042                 | ENSA         | endosulfine alpha                    | 0.040  | 1.028 | 7.88E-01 | 7.88E+01 |  |
| 7919780 | NM_018178                 | GOLPH3L      | golgi phosphoprotein 3-like          | -0.091 | 0.939 | 5.48E-01 | 5.48E+01 |  |
| 7919815 | NM_000396                 | CTSK         | cathepsin K                          | 0.145  | 1.106 | 4.87E-01 | 4.87E+01 |  |
| 7919825 | NM_001668                 | ARNT         | aryl hydrocarbon receptor nuclear    | -0.011 | 0.992 | 9.58E-01 | 9.58E+01 |  |
| 7919854 | ---                       | ---          | ---                                  | -0.039 | 0.973 | 9.18E-01 | 9.18E+01 |  |
| 7919856 | NM_181746                 | LASS2        | LAG1 homolog, ceramide synthase      | -0.050 | 0.966 | 7.07E-01 | 7.07E+01 |  |
| 7919888 | NM_00103870               | CDC42SE1     | CDC42 small effector 1               | 0.033  | 1.023 | 8.27E-01 | 8.27E+01 |  |
| 7919898 | NM_030913                 | SEMA6C       | sema domain, transmembrane do        | -0.019 | 0.987 | 8.91E-01 | 8.91E+01 |  |
| 7919923 | NM_212551                 | LYSMD1       | LysM, putative peptidoglycan-bind    | -0.008 | 0.994 | 9.77E-01 | 9.77E+01 |  |
| 7919929 | NM_013353                 | TMOD4        | tropomodulin 4 (muscle)              | -0.043 | 0.970 | 8.50E-01 | 8.50E+01 |  |
| 7919940 | NM_005997                 | VPS72        | vacuolar protein sorting 72 homol    | 0.007  | 1.005 | 9.69E-01 | 9.69E+01 |  |
| 7919950 | NM_002651                 | PI4KB        | phosphatidylinositol 4-kinase, cata  | -0.003 | 0.998 | 9.85E-01 | 9.85E+01 |  |
| 7919971 | NM_000449                 | RFX5         | regulatory factor X, 5 (influences H | 0.153  | 1.112 | 1.89E-01 | 1.89E+01 |  |
| 7919984 | NM_003944                 | SELENBP1     | selenium binding protein 1           | -0.055 | 0.962 | 5.73E-01 | 5.73E+01 |  |
| 7920000 | NM_015100                 | POGZ         | pogo transposable element with Z     | -0.053 | 0.964 | 5.56E-01 | 5.56E+01 |  |
| 7920025 | ---                       | ---          | ---                                  | 0.055  | 1.039 | 6.00E-01 | 6.00E+01 |  |
| 7920027 | NM_007185                 | TNRC4        | trinucleotide repeat containing 4    | -0.073 | 0.951 | 3.03E-01 | 3.03E+01 |  |
| 7920047 | NM_031420                 | MRPL9        | mitochondrial ribosomal protein L    | -0.101 | 0.933 | 4.84E-01 | 4.84E+01 |  |
| 7920057 | NM_00108396               | TDRKH        | tudor and KH domain containing       | -0.017 | 0.988 | 9.55E-01 | 9.55E+01 |  |
| 7920077 | NM_00100443               | LINGO4       | leucine rich repeat and lg domain    | -0.027 | 0.981 | 8.40E-01 | 8.40E+01 |  |
| 7920082 | NM_005060                 | RORC         | RAR-related orphan receptor C        | -0.014 | 0.991 | 9.35E-01 | 9.35E+01 |  |
| 7920114 | NM_053055                 | THEM4        | thioesterase superfamily member      | -0.102 | 0.932 | 7.53E-01 | 7.53E+01 |  |
| 7920123 | NM_002966                 | S100A10      | S100 calcium binding protein A10     | 0.111  | 1.080 | 6.31E-01 | 6.31E+01 |  |
| 7920128 | NM_005620                 | S100A11      | S100 calcium binding protein A11     | 0.105  | 1.075 | 7.08E-01 | 7.08E+01 |  |
| 7920141 | NM_007113                 | TCHH         | trichohyalin                         | -0.050 | 0.966 | 6.78E-01 | 6.78E+01 |  |
| 7920178 | NM_016190                 | CRNN         | cornulin                             | -0.046 | 0.969 | 7.00E-01 | 7.00E+01 |  |
| 7920182 | NM_178435                 | LCE3E        | late cornified envelope 3E           | -0.015 | 0.990 | 9.37E-01 | 9.37E+01 |  |
| 7920185 | NM_032563                 | LCE3D        | late cornified envelope 3D           | 0.005  | 1.003 | 9.85E-01 | 9.85E+01 |  |
| 7920191 | NM_178431                 | LCE3A        | late cornified envelope 3A           | -0.019 | 0.987 | 9.00E-01 | 9.00E+01 |  |
| 7920193 | NM_178351                 | LCE1C        | late cornified envelope 1C           | -0.118 | 0.922 | 3.29E-01 | 3.29E+01 |  |
| 7920217 | NM_00101429               | SPRR2G       | small proline-rich protein 2G        | -0.069 | 0.953 | 5.63E-01 | 5.63E+01 |  |
| 7920228 | NM_020393                 | PGLYRP4      | peptidoglycan recognition protein    | -0.015 | 0.990 | 9.24E-01 | 9.24E+01 |  |
| 7920244 | NM_002964                 | S100A8       | S100 calcium binding protein A8      | -0.100 | 0.933 | 9.17E-01 | 9.17E+01 |  |
| 7920258 | NM_014624                 | S100A6       | S100 calcium binding protein A6      | 0.292  | 1.224 | 1.52E-02 | 1.52E+00 |  |
| 7920264 | NM_002962                 | S100A5       | S100 calcium binding protein A5      | 0.037  | 1.026 | 8.05E-01 | 8.05E+01 |  |
| 7920297 | NM_020672                 | S100A14      | S100 calcium binding protein A14     | 0.033  | 1.023 | 8.29E-01 | 8.29E+01 |  |
| 7920317 | NM_004515                 | ILF2         | interleukin enhancer binding facto   | -0.015 | 0.989 | 9.37E-01 | 9.37E+01 |  |
| 7920333 | ---                       | ---          | ---                                  | 0.028  | 1.019 | 9.53E-01 | 9.53E+01 |  |
| 7920335 | ---                       | ---          | ---                                  | -0.082 | 0.945 | 8.54E-01 | 8.54E+01 |  |
| 7920337 | NM_023015                 | INTS3        | integrator complex subunit 3         | -0.006 | 0.996 | 9.83E-01 | 9.83E+01 |  |
| 7920341 | NM_020699                 | GATAD2B      | GATA zinc finger domain containin    | -0.103 | 0.931 | 2.13E-01 | 2.13E+01 |  |
| 7920354 | NM_014856                 | DENND4B      | DENN/MADD domain containing 4        | 0.065  | 1.046 | 3.71E-01 | 3.71E+01 |  |
| 7920382 | NM_181715                 | CRTC2        | CREB regulated transcription coac    | -0.093 | 0.938 | 3.56E-01 | 3.56E+01 |  |
| 7920401 | NM_014437                 | SLC39A1      | solute carrier family 39 (zinc trans | -0.039 | 0.974 | 8.34E-01 | 8.34E+01 |  |
| 7920409 | NM_006694                 | JTB          | jumping translocation breakpoint     | -0.067 | 0.954 | 6.58E-01 | 6.58E+01 |  |
| 7920422 | NM_002870                 | RAB13        | RAB13, member RAS oncogene fam       | -0.233 | 0.851 | 5.24E-01 | 5.24E+01 |  |
| 7920472 | NM_152263                 | TPM3         | tropomyosin 3                        | 0.041  | 1.029 | 7.83E-01 | 7.83E+01 |  |
| 7920492 | NM_00109861               | C1orf43      | chromosome 1 open reading fram       | 0.018  | 1.012 | 9.40E-01 | 9.40E+01 |  |
| 7920506 | NM_00101084               | SHE          | Src homology 2 domain containing     | 0.032  | 1.022 | 8.08E-01 | 8.08E+01 |  |
| 7920515 | NM_017582                 | UBE2Q1       | ubiquitin-conjugating enzyme E2Q     | -0.026 | 0.982 | 8.54E-01 | 8.54E+01 |  |
| 7920531 | NM_001111                 | ADAR         | adenosine deaminase, RNA-specif      | 0.103  | 1.074 | 5.13E-01 | 5.13E+01 |  |
| 7920552 | NM_002249                 | KCNN3        | potassium intermediate/small con     | -0.015 | 0.990 | 9.14E-01 | 9.14E+01 |  |
| 7920567 | NM_006556                 | PMVK         | phosphomevalonate kinase             | 0.000  | 1.000 | 1.00E+00 | 1.00E+02 |  |

|         |             |             |                                      |        |       |          |          |  |
|---------|-------------|-------------|--------------------------------------|--------|-------|----------|----------|--|
| 7920575 | NM_020524   | PBXIP1      | pre-B-cell leukemia homeobox int     | -0.041 | 0.972 | 7.05E-01 | 7.05E+01 |  |
| 7920594 | NM_138300   | PYGO2       | pygopus homolog 2 (Drosophila)       | -0.048 | 0.968 | 7.07E-01 | 7.07E+01 |  |
| 7920600 | NM_183001   | SHC1        | SHC (Src homology 2 domain cont      | -0.026 | 0.982 | 8.78E-01 | 8.78E+01 |  |
| 7920616 | NM_144622   | DCST2       | DC-STAMP domain containing 2         | 0.036  | 1.025 | 8.05E-01 | 8.05E+01 |  |
| 7920633 | NM_018973   | DPM3        | dolichyl-phosphate mannosyltrans     | -0.102 | 0.932 | 2.15E-01 | 2.15E+01 |  |
| 7920642 | NM_00101801 | MUC1        | mucin 1, cell surface associated     | 0.007  | 1.005 | 9.77E-01 | 9.77E+01 |  |
| 7920659 | NM_173852   | KRTCAP2     | keratinocyte associated protein 2    | -0.049 | 0.966 | 7.66E-01 | 7.66E+01 |  |
| 7920664 | NM_007112   | THBS3       | thrombospondin 3                     | 0.037  | 1.026 | 8.69E-01 | 8.69E+01 |  |
| 7920697 | NM_000157   | GBA         | glucosidase, beta; acid (includes gl | -0.013 | 0.991 | 9.81E-01 | 9.81E+01 |  |
| 7920707 | NM_006589   | FAM189B     | family with sequence similarity 18   | -0.004 | 0.997 | 9.83E-01 | 9.83E+01 |  |
| 7920725 | NM_005698   | SCAMP3      | secretory carrier membrane prote     | 0.074  | 1.053 | 3.38E-01 | 3.38E+01 |  |
| 7920737 | NM_003993   | CLK2        | CDC-like kinase 2                    | -0.074 | 0.950 | 4.11E-01 | 4.11E+01 |  |
| 7920744 | NM_000298   | PKLR        | pyruvate kinase, liver and RBC       | -0.085 | 0.943 | 4.03E-01 | 4.03E+01 |  |
| 7920757 | NM_002004   | FDPS        | farnesyl diphosphate synthase (far   | -0.026 | 0.982 | 8.91E-01 | 8.91E+01 |  |
| 7920766 | NM_018489   | ASH1L       | ash1 (absent, small, or homeotic)-   | -0.031 | 0.979 | 7.95E-01 | 7.95E+01 |  |
| 7920799 | NM_139118   | YY1AP1      | YY1 associated protein 1             | 0.011  | 1.007 | 9.48E-01 | 9.48E+01 |  |
| 7920810 | NM_00103753 | GON4L       | gon-4-like (C. elegans)              | -0.029 | 0.980 | 8.41E-01 | 8.41E+01 |  |
| 7920839 | NM_006912   | RI1T        | Ras-like without CAAX 1              | -0.024 | 0.984 | 9.44E-01 | 9.44E+01 |  |
| 7920852 | BC062637    | KIAA0907    | KIAA0907                             | -0.054 | 0.963 | 7.03E-01 | 7.03E+01 |  |
| 7920873 | NR_002974   | SNORA42     | small nucleolar RNA, H/ACA box 4     | -0.155 | 0.898 | 2.56E-01 | 2.56E+01 |  |
| 7920877 | NM_004723   | ARHGEF2     | Rho/Rac guanine nucleotide excha     | 0.026  | 1.018 | 9.15E-01 | 9.15E+01 |  |
| 7920903 | NM_003145   | SSR2        | signal sequence receptor, beta (tra  | 0.056  | 1.040 | 6.93E-01 | 6.93E+01 |  |
| 7920912 | NM_020131   | UBQLN4      | ubiquilin 4                          | -0.032 | 0.978 | 7.89E-01 | 7.89E+01 |  |
| 7920928 | NM_024897   | PAQR6       | progesterin and adipoQ receptor far  | -0.030 | 0.980 | 7.40E-01 | 7.40E+01 |  |
| 7920944 | NM_015327   | SMG5        | Smg-5 homolog, nonsense mediat       | 0.118  | 1.085 | 2.01E-01 | 2.01E+01 |  |
| 7920971 | NM_144580   | C1orf85     | chromosome 1 open reading fram       | 0.335  | 1.262 | 6.04E-02 | 6.04E+00 |  |
| 7920984 | NM_005998   | CCT3        | chaperonin containing TCP1, subu     | -0.031 | 0.979 | 8.80E-01 | 8.80E+01 |  |
| 7921014 | NM_005920   | MEF2D       | myocyte enhancer factor 2D           | -0.052 | 0.965 | 6.83E-01 | 6.83E+01 |  |
| 7921031 | ---         | ---         | ---                                  | -0.185 | 0.880 | 6.54E-01 | 6.54E+01 |  |
| 7921076 | NM_182679   | GPATCH4     | G patch domain containing 4          | -0.083 | 0.944 | 6.32E-01 | 6.32E+01 |  |
| 7921088 | NM_006617   | NES         | nestin                               | -0.078 | 0.947 | 3.42E-01 | 3.42E+01 |  |
| 7921110 | NM_030980   | ISG20L2     | interferon stimulated exonuclease    | -0.045 | 0.969 | 8.18E-01 | 8.18E+01 |  |
| 7921121 | NM_145729   | MRPL24      | mitochondrial ribosomal protein L    | -0.119 | 0.921 | 5.38E-01 | 5.38E+01 |  |
| 7921133 | NM_004494   | HDGF        | hepatoma-derived growth factor (     | -0.035 | 0.976 | 8.04E-01 | 8.04E+01 |  |
| 7921144 | NM_00116144 | SH2D2A      | SH2 domain protein 2A                | -0.167 | 0.891 | 3.06E-01 | 3.06E+01 |  |
| 7921155 | NM_014215   | INSRR       | insulin receptor-related receptor    | 0.018  | 1.013 | 9.00E-01 | 9.00E+01 |  |
| 7921179 | NM_198236   | ARHGEF11    | Rho guanine nucleotide exchange      | 0.309  | 1.239 | 1.08E-01 | 1.08E+01 |  |
| 7921222 | NM_00100434 | ETV3L       | ets variant 3-like                   | -0.122 | 0.919 | 2.07E-01 | 2.07E+01 |  |
| 7921275 | NM_052939   | FCRL3       | Fc receptor-like 3                   | 0.236  | 1.178 | 3.02E-01 | 3.02E+01 |  |
| 7921332 | NM_005894   | CD5L        | CD5 molecule-like                    | 0.079  | 1.057 | 3.38E-01 | 3.38E+01 |  |
| 7921342 | AK057458    | hCG_1994895 | hCG1994895                           | -0.067 | 0.955 | 6.05E-01 | 6.05E+01 |  |
| 7921344 | NM_012081   | ELL2        | elongation factor, RNA polymerase    | -0.065 | 0.956 | 8.55E-01 | 8.55E+01 |  |
| 7921360 | NM_00100518 | OR6Y1       | olfactory receptor, family 6, subfa  | -0.070 | 0.953 | 5.84E-01 | 5.84E+01 |  |
| 7921434 | NM_004833   | AIM2        | absent in melanoma 2                 | 0.178  | 1.132 | 4.15E-01 | 4.15E+01 |  |
| 7921462 | NM_00101366 | VSIG8       | V-set and immunoglobulin domain      | 0.049  | 1.035 | 7.39E-01 | 7.39E+01 |  |
| 7921487 | NM_003564   | TAGLN2      | transgelin 2                         | 0.066  | 1.047 | 7.89E-01 | 7.89E+01 |  |
| 7921492 | NM_00113505 | IGSF9       | immunoglobulin superfamily, men      | -0.115 | 0.923 | 1.65E-01 | 1.65E+01 |  |
| 7921526 | NM_145167   | PIGM        | phosphatidylinositol glycan ancho    | 0.111  | 1.080 | 5.48E-01 | 5.48E+01 |  |
| 7921538 | NM_052868   | IGSF8       | immunoglobulin superfamily, men      | -0.013 | 0.991 | 9.27E-01 | 9.27E+01 |  |
| 7921552 | NM_015726   | DCAF8       | DBP1 and CUL4 associated factor      | -0.022 | 0.985 | 8.94E-01 | 8.94E+01 |  |
| 7921571 | NM_002857   | PEX19       | peroxisomal biogenesis factor 19     | -0.133 | 0.912 | 8.79E-02 | 8.79E+00 |  |
| 7921583 | NM_00109839 | COPA        | coatamer protein complex, subun      | 0.083  | 1.059 | 6.84E-01 | 6.84E+01 |  |
| 7921621 | ---         | ---         | ---                                  | 0.207  | 1.154 | 5.53E-01 | 5.53E+01 |  |
| 7921625 | NM_052931   | SLAMF6      | SLAM family member 6                 | 0.283  | 1.217 | 2.04E-02 | 2.04E+00 |  |
| 7921652 | NM_003037   | SLAMF1      | signaling lymphocytic activation m   | -0.303 | 0.811 | 2.55E-01 | 2.55E+01 |  |
| 7921667 | NM_001778   | CD48        | CD48 molecule                        | -0.023 | 0.984 | 9.37E-01 | 9.37E+01 |  |
| 7921677 | NM_016382   | CD244       | CD244 molecule, natural killer cell  | 0.052  | 1.037 | 9.22E-01 | 9.22E+01 |  |
| 7921713 | NM_016946   | F11R        | F11 receptor                         | -0.103 | 0.931 | 4.84E-01 | 4.84E+01 |  |
| 7921738 | NM_007122   | USF1        | upstream transcription factor 1      | 0.163  | 1.120 | 1.17E-01 | 1.17E+01 |  |
| 7921752 | NM_00102559 | ARHGAP30    | Rho GTPase activating protein 30     | -0.004 | 0.997 | 9.85E-01 | 9.85E+01 |  |
| 7921773 | NM_030916   | PVR4L       | poliovirus receptor-related 4        | -0.003 | 0.998 | 9.86E-01 | 9.86E+01 |  |
| 7921786 | NM_012394   | PFDN2       | prefoldin subunit 2                  | -0.060 | 0.959 | 5.92E-01 | 5.92E+01 |  |
| 7921793 | NM_032998   | DEDD        | death effector domain containing     | -0.001 | 0.999 | 9.97E-01 | 9.97E+01 |  |
| 7921806 | NM_003779   | B4GALT3     | UDP-Gal:betaGlcNAc beta 1,4- gal     | 0.006  | 1.004 | 9.74E-01 | 9.74E+01 |  |
| 7921834 | NM_001643   | APOA2       | apolipoprotein A-II                  | 0.056  | 1.040 | 8.13E-01 | 8.13E+01 |  |
| 7921840 | NM_00107748 | NR113       | nuclear receptor subfamily 1, grou   | 0.071  | 1.050 | 6.18E-01 | 6.18E+01 |  |
| 7921895 | NM_182581   | C1orf111    | chromosome 1 open reading fram       | 0.023  | 1.016 | 8.88E-01 | 8.88E+01 |  |
| 7921900 | NM_053282   | SH2D1B      | SH2 domain containing 1B             | 0.150  | 1.109 | 8.08E-01 | 8.08E+01 |  |
| 7921930 | ---         | ---         | ---                                  | 0.063  | 1.045 | 7.58E-01 | 7.58E+01 |  |
| 7921936 | NM_177398   | LMX1A       | LIM homeobox transcription facto     | -0.036 | 0.976 | 7.56E-01 | 7.56E+01 |  |
| 7921970 | NM_000696   | ALDH9A1     | aldehyde dehydrogenase 9 family,     | 0.016  | 1.011 | 9.04E-01 | 9.04E+01 |  |
| 7921987 | NM_019026   | TMCO1       | transmembrane and coiled-coil do     | 0.045  | 1.032 | 7.92E-01 | 7.92E+01 |  |
| 7922001 | BC114214    | FAM78B      | family with sequence similarity 78   | -0.022 | 0.985 | 8.32E-01 | 8.32E+01 |  |
| 7922008 | NM_053053   | TADA1L      | transcriptional adaptor 1 (HFI1 ho   | -0.029 | 0.980 | 9.27E-01 | 9.27E+01 |  |
| 7922029 | NM_005814   | GPA33       | glycoprotein A33 (transmembrane      | 0.159  | 1.117 | 2.64E-01 | 2.64E+01 |  |
| 7922040 | NM_198053   | CD247       | CD247 molecule                       | -0.044 | 0.970 | 8.73E-01 | 8.73E+01 |  |
| 7922051 | NM_003851   | CREG1       | cellular repressor of E1A-stimulat   | 0.133  | 1.096 | 7.72E-01 | 7.72E+01 |  |

|         |             |            |                                     |        |       |          |          |
|---------|-------------|------------|-------------------------------------|--------|-------|----------|----------|
| 7922095 | NR_026550   | BRP44      | brain protein 44                    | -0.058 | 0.961 | 6.80E-01 | 6.80E+01 |
| 7922104 | NM_004483   | GCSH       | glycine cleavage system protein H   | 0.055  | 1.039 | 8.06E-01 | 8.06E+01 |
| 7922108 | NM_153832   | GPR161     | G protein-coupled receptor 161      | -0.009 | 0.994 | 9.57E-01 | 9.57E+01 |
| 7922121 | NR_026844   | ANKRD36BL1 | ankyrin repeat domain 36B-like 1    | 0.258  | 1.196 | 7.10E-02 | 7.10E+00 |
| 7922162 | NM_006996   | SLC19A2    | solute carrier family 19 (thiamine  | -0.053 | 0.964 | 8.23E-01 | 8.23E+01 |
| 7922174 | NM_000130   | F5         | coagulation factor V (proaccelerin  | -0.011 | 0.992 | 9.86E-01 | 9.86E+01 |
| 7922219 | NM_000655   | SELL       | selectin L                          | 0.059  | 1.042 | 8.38E-01 | 8.38E+01 |
| 7922250 | NM_181093   | SCYL3      | SCY1-like 3 (S. cerevisiae)         | 0.064  | 1.046 | 6.78E-01 | 6.78E+01 |
| 7922268 | NM_014970   | KIFAP3     | kinesin-associated protein 3        | -0.070 | 0.953 | 5.68E-01 | 5.68E+01 |
| 7922299 | ---         | ---        | ---                                 | -0.068 | 0.954 | 6.33E-01 | 6.33E+01 |
| 7922309 | NM_003762   | VAMP4      | vesicle-associated membrane prot    | -0.031 | 0.979 | 8.63E-01 | 8.63E+01 |
| 7922326 | ---         | ---        | ---                                 | 0.009  | 1.006 | 9.67E-01 | 9.67E+01 |
| 7922328 | ---         | ---        | ---                                 | -0.097 | 0.935 | 4.29E-01 | 4.29E+01 |
| 7922330 | NM_153747   | PIGC       | phosphatidylinositol glycan ancho   | 0.061  | 1.043 | 5.98E-01 | 5.98E+01 |
| 7922351 | AK130460    | LOC646870  | hypothetical protein LOC646870      | 0.047  | 1.033 | 8.86E-01 | 8.86E+01 |
| 7922400 | ---         | ---        | ---                                 | -0.102 | 0.932 | 6.80E-01 | 6.80E+01 |
| 7922402 | NR_002746   | SNORD47    | small nucleolar RNA, C/D box 47     | -0.054 | 0.963 | 8.45E-01 | 8.45E+01 |
| 7922404 | NR_003940   | SNORD80    | small nucleolar RNA, C/D box 80     | -0.095 | 0.936 | 7.56E-01 | 7.56E+01 |
| 7922406 | NR_003939   | SNORD79    | small nucleolar RNA, C/D box 79     | 0.065  | 1.046 | 8.17E-01 | 8.17E+01 |
| 7922408 | NR_003944   | SNORD78    | small nucleolar RNA, C/D box 78     | -0.015 | 0.989 | 9.78E-01 | 9.78E+01 |
| 7922410 | NR_002750   | SNORD44    | small nucleolar RNA, C/D box 44     | 0.034  | 1.024 | 9.55E-01 | 9.55E+01 |
| 7922414 | NR_003942   | SNORD76    | small nucleolar RNA, C/D box 76     | -0.046 | 0.969 | 8.45E-01 | 8.45E+01 |
| 7922416 | NR_003941   | SNORD75    | small nucleolar RNA, C/D box 75     | -0.395 | 0.760 | 1.11E-01 | 1.11E+01 |
| 7922432 | NM_172071   | RC3H1      | ring finger and CCHH-type zinc fing | 0.015  | 1.010 | 9.30E-01 | 9.30E+01 |
| 7922456 | ---         | ---        | ---                                 | -0.197 | 0.872 | 2.45E-01 | 2.45E+01 |
| 7922460 | ---         | ---        | ---                                 | 0.156  | 1.115 | 7.19E-01 | 7.19E+01 |
| 7922462 | NM_022100   | MRPS14     | mitochondrial ribosomal protein S   | 0.072  | 1.051 | 6.59E-01 | 6.59E+01 |
| 7922474 | NM_014656   | KIAA0040   | KIAA0040                            | 0.229  | 1.172 | 6.46E-02 | 6.46E+00 |
| 7922504 | NM_022457   | RFWD2      | ring finger and WD repeat domain    | 0.080  | 1.057 | 5.36E-01 | 5.36E+01 |
| 7922523 | ---         | ---        | ---                                 | 0.062  | 1.044 | 7.75E-01 | 7.75E+01 |
| 7922525 | NM_004319   | ASTN1      | astrotactin 1                       | -0.011 | 0.993 | 9.50E-01 | 9.50E+01 |
| 7922590 | AK125993    | NCRNA00083 | non-protein coding RNA 83           | -0.014 | 0.990 | 9.30E-01 | 9.30E+01 |
| 7922596 | AK096082    | LOC646976  | hypothetical LOC646976              | 0.086  | 1.062 | 5.57E-01 | 5.57E+01 |
| 7922610 | NM_007314   | ABL2       | v-abl Abelson murine leukemia vir   | 0.026  | 1.018 | 9.30E-01 | 9.30E+01 |
| 7922637 | NM_145034   | TOR1AIP2   | torsin A interacting protein 2      | 0.007  | 1.005 | 9.81E-01 | 9.81E+01 |
| 7922646 | NM_022347   | IFRG15     | interferon responsive gene 15       | -0.015 | 0.990 | 9.62E-01 | 9.62E+01 |
| 7922648 | NM_015602   | TOR1AIP1   | torsin A interacting protein 1      | -0.038 | 0.974 | 7.56E-01 | 7.56E+01 |
| 7922652 | ---         | ---        | ---                                 | -0.104 | 0.931 | 3.90E-01 | 3.90E+01 |
| 7922656 | NM_032360   | ACBD6      | acyl-Coenzyme A binding domain      | 0.057  | 1.040 | 7.52E-01 | 7.52E+01 |
| 7922669 | NM_005819   | STX6       | syntaxin 6                          | 0.122  | 1.088 | 4.97E-01 | 4.97E+01 |
| 7922684 | ---         | ---        | ---                                 | -0.034 | 0.977 | 8.41E-01 | 8.41E+01 |
| 7922686 | NM_00100999 | ZNF648     | zinc finger protein 648             | -0.120 | 0.920 | 7.81E-02 | 7.81E+00 |
| 7922707 | NM_021133   | RNASL      | ribonuclease L (2',5'-oligoadeny    | 0.114  | 1.082 | 4.35E-01 | 4.35E+01 |
| 7922717 | NM_002928   | RGS16      | regulator of G-protein signaling 16 | -0.050 | 0.966 | 6.60E-01 | 6.60E+01 |
| 7922727 | NM_00110245 | RGS8       | regulator of G-protein signaling 8  | -0.024 | 0.984 | 8.77E-01 | 8.77E+01 |
| 7922752 | ---         | ---        | ---                                 | 0.104  | 1.075 | 5.35E-01 | 5.35E+01 |
| 7922773 | NM_000433   | NCF2       | neutrophil cytosolic factor 2       | 0.441  | 1.357 | 3.02E-01 | 3.02E+01 |
| 7922793 | NM_005717   | ARPC5      | actin related protein 2/3 complex   | 0.073  | 1.052 | 5.53E-01 | 5.53E+01 |
| 7922807 | NM_015101   | GLT2SD2    | glycosyltransferase 25 domain cor   | -0.002 | 0.999 | 9.97E-01 | 9.97E+01 |
| 7922823 | NM_025191   | EDEM3      | ER degradation enhancer, mannos     | 0.023  | 1.016 | 9.25E-01 | 9.25E+01 |
| 7922846 | NM_052966   | FAM129A    | family with sequence similarity 12  | -0.305 | 0.810 | 2.83E-02 | 2.83E+00 |
| 7922870 | NM_030934   | C1orf25    | chromosome 1 open reading fram      | 0.072  | 1.051 | 6.05E-01 | 6.05E+01 |
| 7922887 | ---         | ---        | ---                                 | 0.172  | 1.127 | 7.09E-01 | 7.09E+01 |
| 7922889 | NM_006469   | IVNS1ABP   | influenza virus NS1A binding prote  | -0.057 | 0.961 | 6.62E-01 | 6.62E+01 |
| 7922912 | NM_003292   | TPR        | translocated promoter region (to    | -0.018 | 0.988 | 9.00E-01 | 9.00E+01 |
| 7923007 | NM_015984   | UCHL5      | ubiquitin carboxyl-terminal hydrol  | 0.012  | 1.008 | 9.53E-01 | 9.53E+01 |
| 7923027 | NM_197962   | GLRX2      | glutaredoxin 2                      | 0.053  | 1.038 | 8.10E-01 | 8.10E+01 |
| 7923119 | NM_194314   | ZBTB41     | zinc finger and BTB domain contai   | 0.019  | 1.013 | 9.29E-01 | 9.29E+01 |
| 7923131 | NM_00114279 | DENND1B    | DENN/MADD domain containing 1       | 0.111  | 1.080 | 6.09E-01 | 6.09E+01 |
| 7923141 | NM_144977   | DENND1B    | DENN/MADD domain containing 1       | 0.178  | 1.131 | 2.17E-01 | 2.17E+01 |
| 7923183 | NM_012482   | ZNF281     | zinc finger protein 281             | -0.055 | 0.963 | 5.53E-01 | 5.53E+01 |
| 7923221 | NM_00103172 | DDX59      | DEAD (Asp-Glu-Ala-Asp) box polyp    | 0.012  | 1.009 | 9.64E-01 | 9.64E+01 |
| 7923233 | NM_017596   | KIF21B     | kinesin family member 21B           | -0.047 | 0.968 | 5.99E-01 | 5.99E+01 |
| 7923319 | NM_016456   | TMEM9      | transmembrane protein 9             | -0.093 | 0.937 | 3.24E-01 | 3.24E+01 |
| 7923332 | NM_000364   | TNNT2      | troponin T type 2 (cardiac)         | -0.110 | 0.926 | 3.46E-01 | 3.46E+01 |
| 7923347 | NM_005558   | LAD1       | ladinin 1                           | -0.063 | 0.957 | 6.47E-01 | 6.47E+01 |
| 7923360 | NM_003281   | TNNI1      | troponin I type 1 (skeletal, slow)  | -0.025 | 0.983 | 7.95E-01 | 7.95E+01 |
| 7923372 | NM_012396   | PHLDA3     | pleckstrin homology-like domain,    | -0.047 | 0.968 | 7.45E-01 | 7.45E+01 |
| 7923378 | NM_004078   | CSRP1      | cysteine and glycine-rich protein 1 | -0.006 | 0.996 | 9.82E-01 | 9.82E+01 |
| 7923386 | NM_012134   | LMOD1      | leiomodlin 1 (smooth muscle)        | 0.051  | 1.036 | 6.42E-01 | 6.42E+01 |
| 7923394 | NM_138795   | ARL8A      | ADP-ribosylation factor-like 8A     | 0.073  | 1.052 | 6.75E-01 | 6.75E+01 |
| 7923406 | NM_080588   | PTPN7      | protein tyrosine phosphatase, non   | 0.033  | 1.023 | 8.29E-01 | 8.29E+01 |
| 7923426 | NM_014176   | UBE2T      | ubiquitin-conjugating enzyme E2T    | 0.096  | 1.069 | 7.49E-01 | 7.49E+01 |
| 7923438 | NM_001030   | RPS27      | ribosomal protein S27               | -0.035 | 0.976 | 8.31E-01 | 8.31E+01 |
| 7923440 | ---         | ---        | ---                                 | 0.037  | 1.026 | 9.53E-01 | 9.53E+01 |
| 7923442 | NM_177402   | SYT2       | synaptotagmin II                    | -0.119 | 0.921 | 1.76E-01 | 1.76E+01 |
| 7923453 | NM_006618   | KDM5B      | lysine (K)-specific demethylase 5B  | -0.136 | 0.910 | 2.01E-01 | 2.01E+01 |

|         |               |          |                                                                                     |        |       |          |          |  |  |
|---------|---------------|----------|-------------------------------------------------------------------------------------|--------|-------|----------|----------|--|--|
| 7923483 | NM_002871     | RABIF    | RAB interacting factor                                                              | 0.045  | 1.032 | 7.83E-01 | 7.83E+01 |  |  |
| 7923489 | NM_021633     | KLHL12   | kelch-like 12 (Drosophila)                                                          | 0.104  | 1.075 | 4.27E-01 | 4.27E+01 |  |  |
| 7923501 | ---           | ---      | ---                                                                                 | 0.116  | 1.084 | 5.51E-01 | 5.51E+01 |  |  |
| 7923503 | NM_015999     | ADIPOR1  | adiponectin receptor 1                                                              | 0.097  | 1.069 | 6.00E-01 | 6.00E+01 |  |  |
| 7923516 | NM_016243     | CYB5R1   | cytochrome b5 reductase 1                                                           | 0.049  | 1.035 | 7.63E-01 | 7.63E+01 |  |  |
| 7923528 | NM_002479     | MYOG     | myogenin (myogenic factor 4)                                                        | -0.004 | 0.998 | 9.85E-01 | 9.85E+01 |  |  |
| 7923534 | NM_004997     | MYBPH    | myosin binding protein H                                                            | 0.034  | 1.024 | 7.50E-01 | 7.50E+01 |  |  |
| 7923547 | NM_001276     | CHI3L1   | chitinase 3-like 1 (cartilage glycoprotein 110)                                     | 0.395  | 1.315 | 2.72E-01 | 2.72E+01 |  |  |
| 7923582 | ---           | ---      | ---                                                                                 | -0.025 | 0.983 | 9.47E-01 | 9.47E+01 |  |  |
| 7923584 | NR_027902     | C1orf157 | chromosome 1 open reading frame 157                                                 | -0.010 | 0.993 | 9.33E-01 | 9.33E+01 |  |  |
| 7923621 | NM_002256     | KISS1    | KISS-1 metastasis-suppressor                                                        | -0.058 | 0.960 | 4.56E-01 | 4.56E+01 |  |  |
| 7923628 | NM_198447     | GOLT1A   | golgi transport 1 homolog A (S. cerevisiae)                                         | 0.011  | 1.007 | 9.64E-01 | 9.64E+01 |  |  |
| 7923635 | NM_014935     | PLEKHA6  | pleckstrin homology domain containing 6                                             | 0.030  | 1.021 | 7.97E-01 | 7.97E+01 |  |  |
| 7923659 | NM_032833     | PPP1R15B | protein phosphatase 1, regulatory subunit 15B                                       | -0.147 | 0.903 | 6.92E-02 | 6.92E+00 |  |  |
| 7923662 | NM_002646     | PIK3C2B  | phosphoinositide-3-kinase, class 2, beta                                            | -0.042 | 0.972 | 8.33E-01 | 8.33E+01 |  |  |
| 7923698 | ---           | ---      | ---                                                                                 | 0.080  | 1.057 | 7.03E-01 | 7.03E+01 |  |  |
| 7923700 | NM_006338     | LRRN2    | leucine rich repeat neuronal 2                                                      | -0.010 | 0.993 | 9.56E-01 | 9.56E+01 |  |  |
| 7923705 | ---           | ---      | ---                                                                                 | -0.004 | 0.997 | 9.84E-01 | 9.84E+01 |  |  |
| 7923707 | NM_203376     | TMEM81   | transmembrane protein 81                                                            | -0.059 | 0.960 | 7.76E-01 | 7.76E+01 |  |  |
| 7923712 | NM_005057     | RBBP5    | retinoblastoma binding protein 5                                                    | -0.083 | 0.944 | 4.42E-01 | 4.42E+01 |  |  |
| 7923731 | NM_015375     | DSTYK    | dual serine/threonine and tyrosine kinase                                           | 0.007  | 1.005 | 9.67E-01 | 9.67E+01 |  |  |
| 7923753 | NM_030952     | NUAK     | NUAK family, SNF1-like kinase, 2                                                    | -0.004 | 0.997 | 9.87E-01 | 9.87E+01 |  |  |
| 7923762 | NM_018203     | KLHDC8A  | kelch domain containing 8A                                                          | 0.008  | 1.005 | 9.66E-01 | 9.66E+01 |  |  |
| 7923778 | NM_001973     | ELK4     | ELK4, ETS-domain protein (SRF coactivator)                                          | -0.021 | 0.986 | 8.64E-01 | 8.64E+01 |  |  |
| 7923792 | NM_033102     | SLC45A3  | solute carrier family 45, member 3                                                  | 0.000  | 1.000 | 9.99E-01 | 9.99E+01 |  |  |
| 7923798 | NM_022731     | NUCKS1   | nuclear casein kinase and cyclin-dependent kinase 1                                 | 0.014  | 1.010 | 9.30E-01 | 9.30E+01 |  |  |
| 7923810 | ---           | ---      | ---                                                                                 | 0.093  | 1.066 | 8.27E-01 | 8.27E+01 |  |  |
| 7923812 | NM_003929     | RAB7L1   | RAB7, member RAS oncogene family                                                    | 0.002  | 1.001 | 9.96E-01 | 9.96E+01 |  |  |
| 7923824 | NM_173854     | SLC41A1  | solute carrier family 41, member 1                                                  | -0.113 | 0.925 | 2.71E-01 | 2.71E+01 |  |  |
| 7923837 | NM_152491     | PM20D1   | peptidase M20 domain containing 1                                                   | 0.015  | 1.011 | 9.27E-01 | 9.27E+01 |  |  |
| 7923885 | NM_014002     | IKBKE    | inhibitor of kappa light polypeptide chain enhancer of B-cell development 1 epsilon | 0.018  | 1.012 | 9.51E-01 | 9.51E+01 |  |  |
| 7923889 | NM_006893     | LGTN     | ligatin                                                                             | -0.019 | 0.987 | 9.27E-01 | 9.27E+01 |  |  |
| 7923905 | ---           | ---      | ---                                                                                 | -0.265 | 0.832 | 4.70E-01 | 4.70E+01 |  |  |
| 7923907 | NM_000572     | IL10     | interleukin 10                                                                      | -0.304 | 0.810 | 3.41E-01 | 3.41E+01 |  |  |
| 7923917 | NM_005449     | FAIM3    | Fas apoptotic inhibitory molecule 3                                                 | 0.167  | 1.122 | 1.12E-01 | 1.12E+01 |  |  |
| 7923942 | NM_00112298   | FCAMR    | Fc receptor, IgA, IgM, high affinity                                                | 0.071  | 1.050 | 4.06E-01 | 4.06E+01 |  |  |
| 7923956 | ---           | ---      | ---                                                                                 | -0.097 | 0.935 | 3.60E-01 | 3.60E+01 |  |  |
| 7923958 | NM_023938     | C1orf116 | chromosome 1 open reading frame 116                                                 | -0.028 | 0.981 | 8.14E-01 | 8.14E+01 |  |  |
| 7923967 | NM_018566     | YOD1     | YOD1 OTU deubiquitinating enzyme                                                    | -0.005 | 0.997 | 9.84E-01 | 9.84E+01 |  |  |
| 7923974 | ---           | ---      | ---                                                                                 | -0.090 | 0.940 | 7.52E-01 | 7.52E+01 |  |  |
| 7923991 | NM_025179     | PLXNA2   | plexin A2                                                                           | -0.003 | 0.998 | 9.87E-01 | 9.87E+01 |  |  |
| 7924092 | NM_021194     | SLC30A1  | solute carrier family 30 (zinc transporters)                                        | 0.221  | 1.166 | 2.91E-01 | 2.91E+01 |  |  |
| 7924107 | NM_014873     | LPGAT1   | lysophosphatidylglycerol acyltransferase 1                                          | 0.112  | 1.081 | 4.29E-01 | 4.29E+01 |  |  |
| 7924144 | NR_026911     | RPL21P28 | ribosomal protein L21 pseudogene 2                                                  | -0.020 | 0.986 | 9.14E-01 | 9.14E+01 |  |  |
| 7924150 | NM_018252     | TMEM206  | transmembrane protein 206                                                           | 0.030  | 1.021 | 8.88E-01 | 8.88E+01 |  |  |
| 7924166 | NM_018664     | BATF3    | basic leucine zipper transcription factor 3                                         | -0.035 | 0.976 | 8.53E-01 | 8.53E+01 |  |  |
| 7924190 | NM_144567     | ANGEL2   | angel homolog 2 (Drosophila)                                                        | 0.061  | 1.043 | 7.29E-01 | 7.29E+01 |  |  |
| 7924230 | NM_00113011   | FAM108A1 | family with sequence similarity 10, member A1                                       | 0.005  | 1.003 | 9.75E-01 | 9.75E+01 |  |  |
| 7924327 | NM_018040     | GPATCH2  | G patch domain containing 2                                                         | 0.060  | 1.043 | 7.06E-01 | 7.06E+01 |  |  |
| 7924351 | NM_004446     | EPRS     | glutamyl-prolyl-tRNA synthetase                                                     | 0.032  | 1.023 | 8.48E-01 | 8.48E+01 |  |  |
| 7924386 | ---           | ---      | ---                                                                                 | -0.011 | 0.993 | 9.53E-01 | 9.53E+01 |  |  |
| 7924388 | NM_006085     | BPNT1    | 3'[(2'), 5'-bisphosphate nucleotidase]                                              | 0.014  | 1.010 | 9.66E-01 | 9.66E+01 |  |  |
| 7924405 | NM_012414     | RAB3GAP2 | RAB3 GTPase activating protein subunit 2                                            | 0.053  | 1.038 | 7.64E-01 | 7.64E+01 |  |  |
| 7924463 | ---           | ---      | ---                                                                                 | 0.267  | 1.203 | 4.25E-01 | 4.25E+01 |  |  |
| 7924465 | NM_024746     | HHIPL2   | HHIP-like 2                                                                         | -0.022 | 0.985 | 8.66E-01 | 8.66E+01 |  |  |
| 7924491 | BC043142      | AIDA     | axin interactor, dorsalization associated                                           | -0.172 | 0.888 | 3.15E-01 | 3.15E+01 |  |  |
| 7924508 | NM_017982     | SUSD4    | sushi domain containing 4                                                           | -0.026 | 0.982 | 8.64E-01 | 8.64E+01 |  |  |
| 7924526 | NM_005426     | TP53BP2  | tumor protein p53 binding protein 2                                                 | -0.201 | 0.870 | 1.60E-02 | 1.60E+00 |  |  |
| 7924549 | BC032332      | PCMTD2   | protein-L-isoaspartate (D-aspartate) methyltransferase 2                            | -0.016 | 0.989 | 9.61E-01 | 9.61E+01 |  |  |
| 7924553 | ENST000000415 | DEGS1    | degenerative spermatocyte homolog 1                                                 | 0.034  | 1.024 | 8.04E-01 | 8.04E+01 |  |  |
| 7924558 | NM_002533     | NVL      | nuclear VCP-like                                                                    | 0.022  | 1.015 | 9.28E-01 | 9.28E+01 |  |  |
| 7924582 | NM_025160     | WDR26    | WD repeat domain 26                                                                 | -0.038 | 0.974 | 7.42E-01 | 7.42E+01 |  |  |
| 7924603 | NM_002296     | LBR      | lamin B receptor                                                                    | 0.060  | 1.043 | 5.92E-01 | 5.92E+01 |  |  |
| 7924636 | NM_014698     | TMEM63A  | transmembrane protein 63A                                                           | 0.003  | 1.002 | 9.89E-01 | 9.89E+01 |  |  |
| 7924663 | NM_020997     | LEFTY1   | left-right determination factor 1                                                   | 0.001  | 1.001 | 9.97E-01 | 9.97E+01 |  |  |
| 7924669 | NM_013328     | PYCR2    | pyrroline-5-carboxylate reductase                                                   | -0.031 | 0.979 | 7.94E-01 | 7.94E+01 |  |  |
| 7924682 | NM_003240     | LEFTY2   | left-right determination factor 2                                                   | -0.115 | 0.923 | 1.72E-01 | 1.72E+01 |  |  |
| 7924686 | NM_152608     | C1orf55  | chromosome 1 open reading frame 55                                                  | 0.044  | 1.031 | 7.56E-01 | 7.56E+01 |  |  |
| 7924701 | NM_022735     | ACBD3    | acyl-Coenzyme A binding domain containing 3                                         | 0.045  | 1.031 | 5.71E-01 | 5.71E+01 |  |  |
| 7924733 | NM_001618     | PARP1    | poly (ADP-ribose) polymerase 1                                                      | 0.025  | 1.017 | 9.01E-01 | 9.01E+01 |  |  |
| 7924756 | ---           | ---      | ---                                                                                 | 0.024  | 1.017 | 8.73E-01 | 8.73E+01 |  |  |
| 7924758 | ---           | ---      | ---                                                                                 | 0.025  | 1.018 | 9.50E-01 | 9.50E+01 |  |  |
| 7924760 | NM_002221     | ITPKB    | inositol 1,4,5-trisphosphate 3-kinase beta                                          | -0.051 | 0.966 | 7.08E-01 | 7.08E+01 |  |  |
| 7924819 | ---           | ---      | ---                                                                                 | 0.043  | 1.030 | 7.85E-01 | 7.85E+01 |  |  |
| 7924823 | NM_023007     | JMJD4    | jumonji domain containing 4                                                         | -0.049 | 0.967 | 5.27E-01 | 5.27E+01 |  |  |
| 7924832 | NM_003395     | WNT9A    | wingless-type MMTV integration site 9A                                              | -0.046 | 0.969 | 6.01E-01 | 6.01E+01 |  |  |
| 7924840 | ---           | ---      | ---                                                                                 | -0.009 | 0.994 | 9.77E-01 | 9.77E+01 |  |  |

|         |             |            |                                      |        |       |          |          |  |  |
|---------|-------------|------------|--------------------------------------|--------|-------|----------|----------|--|--|
| 7924842 | BC002843    | C1orf35    | chromosome 1 open reading fram       | -0.016 | 0.989 | 9.22E-01 | 9.22E+01 |  |  |
| 7924853 | NM_181462   | MRPL55     | mitochondrial ribosomal protein L    | -0.014 | 0.990 | 9.19E-01 | 9.19E+01 |  |  |
| 7924863 | NM_052843   | OBSCN      | obscurin, cytoskeletal calmodulin    | -0.018 | 0.988 | 9.44E-01 | 9.44E+01 |  |  |
| 7924868 | NM_145214   | TRIM11     | tripartite motif-containing 11       | -0.019 | 0.987 | 8.73E-01 | 8.73E+01 |  |  |
| 7924874 | NM_016102   | TRIM17     | tripartite motif-containing 17       | -0.012 | 0.992 | 9.53E-01 | 9.53E+01 |  |  |
| 7924884 | NM_003493   | HIST3H3    | histone cluster 3, H3                | -0.023 | 0.984 | 8.48E-01 | 8.48E+01 |  |  |
| 7924893 | ---         | ---        | ---                                  | 0.012  | 1.008 | 9.37E-01 | 9.37E+01 |  |  |
| 7924897 | NM_145257   | C1orf96    | chromosome 1 open reading fram       | 0.003  | 1.002 | 9.89E-01 | 9.89E+01 |  |  |
| 7924908 | ---         | ---        | ---                                  | 0.011  | 1.007 | 9.37E-01 | 9.37E+01 |  |  |
| 7924910 | NM_001100   | ACTA1      | actin, alpha 1, skeletal muscle      | -0.026 | 0.982 | 7.77E-01 | 7.77E+01 |  |  |
| 7924923 | NM_018230   | NUP133     | nucleoporin 133kDa                   | 0.098  | 1.070 | 4.03E-01 | 4.03E+01 |  |  |
| 7924956 | NM_012089   | ABCB10     | ATP-binding cassette, sub-family B   | -0.012 | 0.992 | 9.49E-01 | 9.49E+01 |  |  |
| 7924969 | NM_014409   | TAF5L      | TAF5-like RNA polymerase II, p300    | 0.014  | 1.010 | 9.50E-01 | 9.50E+01 |  |  |
| 7924996 | NM_032800   | C1orf198   | chromosome 1 open reading fram       | -0.076 | 0.949 | 5.39E-01 | 5.39E+01 |  |  |
| 7925003 | NM_024525   | TTC13      | tetratricopeptide repeat domain 1    | 0.087  | 1.062 | 3.94E-01 | 3.94E+01 |  |  |
| 7925028 | NM_198552   | FAM89A     | family with sequence similarity 89   | 0.039  | 1.028 | 7.42E-01 | 7.42E+01 |  |  |
| 7925033 | NM_152379   | C1orf131   | chromosome 1 open reading fram       | 0.161  | 1.118 | 2.05E-01 | 2.05E+01 |  |  |
| 7925043 | NM_175876   | EXOC8      | exocyst complex component 8          | -0.021 | 0.986 | 8.83E-01 | 8.83E+01 |  |  |
| 7925048 | NM_022051   | EGLN1      | egl nine homolog 1 (C. elegans)      | 0.038  | 1.027 | 7.72E-01 | 7.72E+01 |  |  |
| 7925062 | NM_020808   | SIPA1L2    | signal-induced proliferation-associ  | 0.083  | 1.059 | 7.90E-01 | 7.90E+01 |  |  |
| 7925089 | NM_014801   | PCNXL2     | pecanex-like 2 (Drosophila)          | -0.087 | 0.942 | 5.17E-01 | 5.17E+01 |  |  |
| 7925128 | ---         | ---        | ---                                  | -0.050 | 0.966 | 7.03E-01 | 7.03E+01 |  |  |
| 7925130 | NM_005646   | TARBP1     | TAR (HIV-1) RNA binding protein 1    | 0.055  | 1.039 | 7.68E-01 | 7.68E+01 |  |  |
| 7925161 | NM_182972   | IRF2BP2    | interferon regulatory factor 2 bind  | -0.022 | 0.985 | 8.69E-01 | 8.69E+01 |  |  |
| 7925174 | NM_014765   | TOMM20     | translocase of outer mitochondria    | 0.018  | 1.013 | 9.49E-01 | 9.49E+01 |  |  |
| 7925184 | NM_015014   | RBM34      | RNA binding motif protein 34         | -0.065 | 0.956 | 3.64E-01 | 3.64E+01 |  |  |
| 7925201 | NM_016374   | ARID4B     | AT rich interactive domain 4B (RBB   | -0.029 | 0.980 | 8.41E-01 | 8.41E+01 |  |  |
| 7925229 | NM_152490   | B3GALNT2   | beta-1,3-N-acetylgalactosaminyltr    | 0.009  | 1.006 | 9.76E-01 | 9.76E+01 |  |  |
| 7925244 | ---         | ---        | ---                                  | 0.014  | 1.010 | 9.49E-01 | 9.49E+01 |  |  |
| 7925250 | NM_00109872 | GNG4       | guanine nucleotide binding protei    | -0.067 | 0.955 | 5.79E-01 | 5.79E+01 |  |  |
| 7925257 | NM_000081   | LYST       | lysosomal trafficking regulator      | 0.000  | 1.000 | 1.00E+00 | 1.00E+02 |  |  |
| 7925318 | ---         | ---        | ---                                  | 0.386  | 1.307 | 1.11E-01 | 1.11E+01 |  |  |
| 7925361 | NM_006499   | LGALS8     | lectin, galactoside-binding, soluble | -0.010 | 0.993 | 9.66E-01 | 9.66E+01 |  |  |
| 7925364 | NM_018072   | HEATR1     | HEAT repeat containing 1             | 0.056  | 1.039 | 7.69E-01 | 7.69E+01 |  |  |
| 7925413 | AF333388    | MT1P2      | metallothionein 1 pseudogene 2       | -0.189 | 0.877 | 8.70E-02 | 8.70E+00 |  |  |
| 7925448 | ---         | ---        | ---                                  | -0.019 | 0.987 | 9.53E-01 | 9.53E+01 |  |  |
| 7925480 | NM_000143   | FH         | fumarate hydratase                   | 0.015  | 1.010 | 9.57E-01 | 9.57E+01 |  |  |
| 7925492 | NM_014322   | OPN3       | opsin 3                              | 0.139  | 1.101 | 3.36E-01 | 3.36E+01 |  |  |
| 7925500 | NM_001821   | CHML       | choroideremia-like (Rab escort pro   | 0.043  | 1.030 | 8.60E-01 | 8.60E+01 |  |  |
| 7925504 | NM_00100434 | MAP1LC3C   | microtubule-associated protein 1     | -0.051 | 0.965 | 6.16E-01 | 6.16E+01 |  |  |
| 7925509 | ---         | ---        | ---                                  | 0.025  | 1.017 | 9.02E-01 | 9.02E+01 |  |  |
| 7925531 | NM_181690   | AKT3       | v-akt murine thymoma viral oncog     | -0.150 | 0.902 | 1.58E-01 | 1.58E+01 |  |  |
| 7925550 | NM_001126   | ADSS       | adenylosuccinate synthase            | -0.088 | 0.941 | 6.20E-01 | 6.20E+01 |  |  |
| 7925561 | NM_198076   | FAM36A     | family with sequence similarity 36   | 0.002  | 1.001 | 9.93E-01 | 9.93E+01 |  |  |
| 7925565 | NM_031844   | HNRNPU     | heterogeneous nuclear ribonucleo     | -0.013 | 0.991 | 8.96E-01 | 8.96E+01 |  |  |
| 7925585 | NM_032328   | EFCAB2     | EF-hand calcium binding domain 2     | 0.051  | 1.036 | 6.06E-01 | 6.06E+01 |  |  |
| 7925587 | ---         | ---        | ---                                  | -0.102 | 0.931 | 5.18E-01 | 5.18E+01 |  |  |
| 7925589 | NM_022743   | SMYD3      | SET and MYND domain containin        | 0.052  | 1.037 | 8.30E-01 | 8.30E+01 |  |  |
| 7925609 | ---         | ---        | ---                                  | 0.024  | 1.017 | 9.69E-01 | 9.69E+01 |  |  |
| 7925622 | NM_015446   | AHCTF1     | AT hook containing transcription f   | -0.045 | 0.969 | 7.51E-01 | 7.51E+01 |  |  |
| 7925677 | NM_024804   | ZNF669     | zinc finger protein 669              | 0.031  | 1.021 | 8.58E-01 | 8.58E+01 |  |  |
| 7925687 | NM_207401   | C1orf229   | chromosome 1 open reading fram       | -0.034 | 0.977 | 7.89E-01 | 7.89E+01 |  |  |
| 7925691 | NM_003431   | ZNF124     | zinc finger protein 124              | 0.245  | 1.185 | 5.53E-02 | 5.53E+00 |  |  |
| 7925701 | ---         | ---        | ---                                  | -0.019 | 0.987 | 9.73E-01 | 9.73E+01 |  |  |
| 7925705 | NM_032752   | ZNF496     | zinc finger protein 496              | 0.024  | 1.017 | 8.05E-01 | 8.05E+01 |  |  |
| 7925728 | NM_00100528 | OR6F1      | olfactory receptor, family 6, subfa  | -0.049 | 0.966 | 7.83E-01 | 7.83E+01 |  |  |
| 7925737 | NM_00100195 | OR11L1     | olfactory receptor, family 11, subf  | -0.025 | 0.983 | 8.22E-01 | 8.22E+01 |  |  |
| 7925739 | ---         | ---        | ---                                  | -0.053 | 0.964 | 7.52E-01 | 7.52E+01 |  |  |
| 7925741 | NM_00100469 | OR2T33     | olfactory receptor, family 2, subfa  | -0.048 | 0.967 | 6.03E-01 | 6.03E+01 |  |  |
| 7925743 | NM_00100469 | OR2T12     | olfactory receptor, family 2, subfa  | -0.035 | 0.976 | 7.19E-01 | 7.19E+01 |  |  |
| 7925749 | NM_00100182 | OR2T34     | olfactory receptor, family 2, subfa  | 0.049  | 1.035 | 7.92E-01 | 7.92E+01 |  |  |
| 7925763 | NM_030645   | SH3BP5L    | SH3-binding domain protein 5-like    | -0.030 | 0.979 | 8.55E-01 | 8.55E+01 |  |  |
| 7925773 | NM_017865   | ZNF692     | zinc finger protein 692              | -0.081 | 0.945 | 2.98E-01 | 2.98E+01 |  |  |
| 7925792 | NM_006624   | ZMYND11    | zinc finger, MYND domain contain     | -0.114 | 0.924 | 2.26E-01 | 2.26E+01 |  |  |
| 7925813 | NR_027152   | C10orf108  | chromosome 10 open reading frar      | -0.024 | 0.983 | 8.46E-01 | 8.46E+01 |  |  |
| 7925821 | ---         | ---        | ---                                  | 0.051  | 1.036 | 8.43E-01 | 8.43E+01 |  |  |
| 7925823 | NM_012341   | GTPBP4     | GTP binding protein 4                | 0.048  | 1.034 | 6.97E-01 | 6.97E+01 |  |  |
| 7925851 | NM_014023   | WDR37      | WD repeat domain 37                  | 0.069  | 1.049 | 5.26E-01 | 5.26E+01 |  |  |
| 7925870 | NR_015376   | NCRNA00200 | non-protein coding RNA 200           | -0.034 | 0.976 | 8.64E-01 | 8.64E+01 |  |  |
| 7925876 | NM_002627   | PFKP       | phosphofructokinase, platelet        | -0.091 | 0.939 | 5.26E-01 | 5.26E+01 |  |  |
| 7925904 | NM_00104017 | AKR1CL2    | aldo-keto reductase family 1, men    | -0.027 | 0.982 | 9.49E-01 | 9.49E+01 |  |  |
| 7925918 | NM_001353   | AKR1C1     | aldo-keto reductase family 1, men    | -0.246 | 0.843 | 9.30E-02 | 9.30E+00 |  |  |
| 7925950 | NM_053049   | UCN3       | urocortin 3 (stresscopin)            | -0.014 | 0.990 | 9.23E-01 | 9.23E+01 |  |  |
| 7925954 | NM_00104716 | NET1       | neuroepithelial cell transforming 1  | 0.004  | 1.003 | 9.90E-01 | 9.90E+01 |  |  |
| 7925972 | NM_005185   | CALML3     | calmodulin-like 3                    | -0.069 | 0.953 | 3.54E-01 | 3.54E+01 |  |  |
| 7925978 | NM_017782   | C10orf18   | chromosome 10 open reading frar      | 0.052  | 1.036 | 7.08E-01 | 7.08E+01 |  |  |
| 7925996 | NM_032807   | FBXO18     | F-box protein, helicase, 18          | 0.011  | 1.007 | 9.54E-01 | 9.54E+01 |  |  |

|         |             |            |                                     |        |       |          |          |
|---------|-------------|------------|-------------------------------------|--------|-------|----------|----------|
| 7926021 | NM_00114554 | RBM17      | RNA binding motif protein 17        | -0.105 | 0.930 | 7.90E-02 | 7.90E+00 |
| 7926059 | ---         | ---        | ---                                 | -0.194 | 0.874 | 4.31E-01 | 4.31E+01 |
| 7926084 | NM_00100197 | ATP5C1     | ATP synthase, H+ transporting, mi   | 0.022  | 1.016 | 9.01E-01 | 9.01E+01 |
| 7926096 | NM_031923   | TAF3       | TAF3 RNA polymerase II, TATA box    | -0.071 | 0.952 | 5.09E-01 | 5.09E+01 |
| 7926105 | NM_00100229 | GATA3      | GATA binding protein 3              | -0.097 | 0.935 | 5.35E-01 | 5.35E+01 |
| 7926127 | NM_00102507 | CUGBP2     | CUG triplet repeat, RNA binding pr  | 0.214  | 1.160 | 2.16E-04 | 2.16E-02 |
| 7926150 | NM_014688   | USP6NL     | USP6 N-terminal like                | -0.018 | 0.987 | 9.04E-01 | 9.04E+01 |
| 7926152 | NM_024693   | ECHDC3     | enoyl Coenzyme A hydratase dom      | 0.000  | 1.000 | 1.00E+00 | 1.00E+02 |
| 7926158 | NM_153256   | C10orf47   | chromosome 10 open reading fram     | -0.032 | 0.978 | 8.58E-01 | 8.58E+01 |
| 7926170 | NM_018706   | DHTKD1     | dehydrogenase E1 and transketola    | 0.144  | 1.105 | 1.31E-01 | 1.31E+01 |
| 7926207 | NM_006023   | CDC123     | cell division cycle 123 homolog (S  | -0.027 | 0.981 | 8.95E-01 | 8.95E+01 |
| 7926223 | NM_153498   | CAMK1D     | calcium/calmodulin-dependent pr     | 0.059  | 1.042 | 6.96E-01 | 6.96E+01 |
| 7926239 | NM_00100821 | OPTN       | optineurin                          | -0.129 | 0.914 | 1.78E-01 | 1.78E+01 |
| 7926283 | NM_003675   | PRPF18     | PRP18 pre-mRNA processing facto     | 0.013  | 1.009 | 9.53E-01 | 9.53E+01 |
| 7926297 | ---         | ---        | ---                                 | -0.026 | 0.982 | 9.18E-01 | 9.18E+01 |
| 7926299 | NM_016299   | HSPA14     | heat shock 70kDa protein 14         | 0.012  | 1.009 | 9.53E-01 | 9.53E+01 |
| 7926319 | NM_024670   | SUV39H2    | suppressor of variegation 3-9 hom   | 0.027  | 1.019 | 8.93E-01 | 8.93E+01 |
| 7926356 | NM_00100148 | PTER       | phosphotriesterase related          | 0.052  | 1.037 | 7.87E-01 | 7.87E+01 |
| 7926368 | NM_003380   | VIM        | vimentin                            | 0.025  | 1.017 | 9.00E-01 | 9.00E+01 |
| 7926385 | NM_003473   | STAM       | signal transducing adaptor molecu   | -0.118 | 0.921 | 1.82E-01 | 1.82E+01 |
| 7926403 | NM_00109884 | FAM23A     | family with sequence similarity 23  | 0.213  | 1.159 | 5.38E-02 | 5.38E+00 |
| 7926445 | NM_00109884 | FAM23A     | family with sequence similarity 23  | 0.213  | 1.159 | 5.38E-02 | 5.38E+00 |
| 7926506 | NM_201596   | CACNB2     | calcium channel, voltage-depende    | 0.049  | 1.034 | 7.42E-01 | 7.42E+01 |
| 7926531 | NM_178815   | ARL5B      | ADP-ribosylation factor-like 5B     | 0.081  | 1.057 | 5.31E-01 | 5.31E+01 |
| 7926565 | NM_004641   | MLLT10     | myeloid/lymphoid or mixed-lineag    | -0.043 | 0.971 | 7.89E-01 | 7.89E+01 |
| 7926596 | NM_012071   | COMMD3     | COMM domain containing 3            | -0.059 | 0.960 | 6.96E-01 | 6.96E+01 |
| 7926609 | NM_005180   | BMI1       | BMI1 polycomb ring finger oncoge    | -0.064 | 0.956 | 6.95E-01 | 6.95E+01 |
| 7926659 | ---         | ---        | ---                                 | -0.055 | 0.962 | 7.35E-01 | 7.35E+01 |
| 7926661 | NM_012228   | MSRB2      | methionine sulfoxide reductase B2   | 0.122  | 1.088 | 2.69E-01 | 2.69E+01 |
| 7926670 | ---         | ---        | ---                                 | 0.017  | 1.012 | 9.00E-01 | 9.00E+01 |
| 7926674 | NM_178161   | PTF1A      | pancreas specific transcription fac | -0.016 | 0.989 | 9.01E-01 | 9.01E+01 |
| 7926677 | NM_00114537 | OTUD1      | OTU domain containing 1             | 0.060  | 1.042 | 8.41E-01 | 8.41E+01 |
| 7926706 | ---         | ---        | ---                                 | -0.063 | 0.957 | 7.57E-01 | 7.57E+01 |
| 7926786 | NM_019043   | APBB1IP    | amyloid beta (A4) precursor prote   | 0.044  | 1.031 | 7.82E-01 | 7.82E+01 |
| 7926805 | ---         | ---        | ---                                 | 0.106  | 1.076 | 7.47E-01 | 7.47E+01 |
| 7926807 | NM_014317   | PDSS1      | prenyl (decaprenyl) diphosphate s   | -0.123 | 0.918 | 7.14E-01 | 7.14E+01 |
| 7926817 | ---         | ---        | ---                                 | 0.027  | 1.019 | 9.37E-01 | 9.37E+01 |
| 7926836 | NM_021252   | RAB18      | RAB18, member RAS oncogene fam      | 0.092  | 1.066 | 5.56E-01 | 5.56E+01 |
| 7926851 | NR_024557   | WAC        | WW domain containing adaptor w      | -0.018 | 0.988 | 9.03E-01 | 9.03E+01 |
| 7926896 | NM_001826   | CKS1B      | CDC28 protein kinase regulatory s   | 0.164  | 1.121 | 5.97E-01 | 5.97E+01 |
| 7926900 | NM_005204   | MAP3K8     | mitogen-activated protein kinase    | -0.011 | 0.993 | 9.76E-01 | 9.76E+01 |
| 7926916 | NR_024285   | ZEB1       | zinc finger E-box binding homeob    | -0.136 | 0.910 | 5.39E-01 | 5.39E+01 |
| 7926936 | NM_024688   | C10orf68   | chromosome 10 open reading fram     | 0.049  | 1.034 | 7.75E-01 | 7.75E+01 |
| 7926979 | ---         | ---        | ---                                 | 0.177  | 1.131 | 3.91E-01 | 3.91E+01 |
| 7926983 | NM_183013   | CREM       | cAMP responsive element modula      | -0.243 | 0.845 | 3.63E-02 | 3.63E+00 |
| 7927008 | NM_181698   | CCNY       | cyclin Y                            | 0.062  | 1.044 | 5.48E-01 | 5.48E+01 |
| 7927028 | NM_153368   | GJD4       | gap junction protein, delta 4, 40.1 | 0.032  | 1.022 | 7.78E-01 | 7.78E+01 |
| 7927062 | NM_006954   | ZNF33A     | zinc finger protein 33A             | -0.005 | 0.997 | 9.87E-01 | 9.87E+01 |
| 7927071 | NM_00100709 | ZNF37A     | zinc finger protein 37A             | 0.075  | 1.054 | 5.56E-01 | 5.56E+01 |
| 7927082 | NR_003086   | HSD17B7P2  | hydroxysteroid (17-beta) dehydro    | -0.041 | 0.972 | 9.12E-01 | 9.12E+01 |
| 7927089 | ---         | ---        | ---                                 | 0.267  | 1.203 | 4.25E-01 | 4.25E+01 |
| 7927091 | NR_024497   | LOC399744  | hypothetical LOC399744              | 0.018  | 1.012 | 9.20E-01 | 9.20E+01 |
| 7927095 | BC032332    | PCMTD2     | protein-L-isoaspartate (D-aspartat  | -0.019 | 0.987 | 9.53E-01 | 9.53E+01 |
| 7927099 | NR_026827   | LOC84856   | hypothetical LOC84856               | -0.031 | 0.979 | 8.06E-01 | 8.06E+01 |
| 7927106 | ---         | ---        | ---                                 | 0.037  | 1.026 | 9.38E-01 | 9.38E+01 |
| 7927108 | NM_014753   | BMS1       | BMS1 homolog, ribosome assemb       | -0.126 | 0.916 | 3.36E-01 | 3.36E+01 |
| 7927146 | NM_018590   | CSGALNACT2 | chondroitin sulfate N-acetylgalact  | 0.092  | 1.066 | 6.97E-01 | 6.97E+01 |
| 7927153 | ---         | ---        | ---                                 | -0.053 | 0.964 | 7.60E-01 | 7.60E+01 |
| 7927155 | NM_173160   | FXRD4      | FXRD domain containing ion trans    | 0.019  | 1.013 | 9.00E-01 | 9.00E+01 |
| 7927167 | ---         | ---        | ---                                 | 0.013  | 1.009 | 9.60E-01 | 9.60E+01 |
| 7927173 | NM_145312   | ZNF485     | zinc finger protein 485             | 0.007  | 1.005 | 9.86E-01 | 9.86E+01 |
| 7927179 | NM_00112337 | TMEM72     | transmembrane protein 72            | -0.041 | 0.972 | 7.87E-01 | 7.87E+01 |
| 7927186 | NM_032023   | RASSF4     | Ras association (RalGDS/AF-6) dor   | 0.131  | 1.095 | 6.57E-01 | 6.57E+01 |
| 7927202 | NM_006963   | ZNF22      | zinc finger protein 22 (KOX 15)     | 0.016  | 1.011 | 9.24E-01 | 9.24E+01 |
| 7927231 | NM_00114400 | AGAP5      | ArfGAP with GTPase domain, anky     | -0.033 | 0.978 | 8.53E-01 | 8.53E+01 |
| 7927233 | NM_015262   | FAM21C     | family with sequence similarity 21  | 0.062  | 1.044 | 6.64E-01 | 6.64E+01 |
| 7927267 | NM_019054   | FAM35A     | family with sequence similarity 35  | 0.222  | 1.167 | 1.31E-02 | 1.31E+00 |
| 7927277 | NM_014696   | GPRIN2     | G protein regulated inducer of neu  | 0.027  | 1.019 | 8.29E-01 | 8.29E+01 |
| 7927285 | NM_005614   | RHEB       | Ras homolog enriched in brain       | 0.180  | 1.133 | 2.04E-01 | 2.04E+01 |
| 7927288 | NM_019054   | FAM35A     | family with sequence similarity 35  | 0.269  | 1.205 | 3.60E-03 | 3.60E-01 |
| 7927305 | NM_00114400 | AGAP5      | ArfGAP with GTPase domain, anky     | 0.001  | 1.001 | 9.95E-01 | 9.95E+01 |
| 7927307 | NM_001630   | ANXA8L2    | annexin A8-like 2                   | -0.029 | 0.980 | 7.63E-01 | 7.63E+01 |
| 7927323 | NM_018232   | FAM21B     | family with sequence similarity 21  | 0.065  | 1.046 | 6.34E-01 | 6.34E+01 |
| 7927353 | NM_00114400 | AGAP5      | ArfGAP with GTPase domain, anky     | 0.044  | 1.031 | 8.01E-01 | 8.01E+01 |
| 7927363 | NM_00113755 | FAM25B     | family with sequence similarity 25  | -0.033 | 0.977 | 8.18E-01 | 8.18E+01 |
| 7927367 | NM_00104008 | ANXA8      | annexin A8                          | -0.032 | 0.978 | 7.26E-01 | 7.26E+01 |
| 7927383 | NM_153034   | ZNF488     | zinc finger protein 488             | -0.093 | 0.938 | 3.18E-01 | 3.18E+01 |

|         |              |           |                                       |        |       |          |          |  |
|---------|--------------|-----------|---------------------------------------|--------|-------|----------|----------|--|
| 7927389 | NM_002750    | MAPK8     | mitogen-activated protein kinase 4    | -0.105 | 0.930 | 4.91E-01 | 4.91E+01 |  |
| 7927405 | NM_020945    | WDFY4     | WDFY family member 4                  | 0.136  | 1.099 | 2.85E-01 | 2.85E+01 |  |
| 7927425 | NM_020945    | WDFY4     | WDFY family member 4                  | 0.065  | 1.046 | 5.68E-01 | 5.68E+01 |  |
| 7927482 | NM_00114293  | CHAT      | choline acetyltransferase             | 0.012  | 1.008 | 9.47E-01 | 9.47E+01 |  |
| 7927502 | NM_003055    | SLC18A3   | solute carrier family 18 (vesicular)  | -0.062 | 0.958 | 5.88E-01 | 5.88E+01 |  |
| 7927513 | NM_015262    | FAM21C    | family with sequence similarity 21    | 0.088  | 1.063 | 5.23E-01 | 5.23E+01 |  |
| 7927519 | NM_006327    | TIMM23    | translocase of inner mitochondrial    | 0.004  | 1.002 | 9.87E-01 | 9.87E+01 |  |
| 7927527 | ---          | ---       | ---                                   | -0.066 | 0.955 | 7.81E-01 | 7.81E+01 |  |
| 7927536 | NM_005437    | NCOA4     | nuclear receptor coactivator 4        | 0.173  | 1.128 | 4.94E-01 | 4.94E+01 |  |
| 7927548 | NM_006327    | TIMM23    | translocase of inner mitochondrial    | 0.016  | 1.011 | 9.60E-01 | 9.60E+01 |  |
| 7927552 | NM_00107766  | AGAP6     | ArfGAP with GTPase domain, anky       | 0.057  | 1.040 | 6.92E-01 | 6.92E+01 |  |
| 7927560 | NM_00100575  | FAM21A    | family with sequence similarity 21    | 0.070  | 1.050 | 5.78E-01 | 5.78E+01 |  |
| 7927595 | ---          | ---       | ---                                   | 0.027  | 1.019 | 9.28E-01 | 9.28E+01 |  |
| 7927597 | ---          | ---       | ---                                   | 0.037  | 1.026 | 8.92E-01 | 8.92E+01 |  |
| 7927643 | ---          | ---       | ---                                   | -0.029 | 0.980 | 8.80E-01 | 8.80E+01 |  |
| 7927645 | ---          | ---       | ---                                   | 0.012  | 1.008 | 9.73E-01 | 9.73E+01 |  |
| 7927649 | NM_018464    | CISD1     | CDGSH iron sulfur domain 1            | 0.006  | 1.004 | 9.88E-01 | 9.88E+01 |  |
| 7927658 | NM_003338    | UBE2D1    | ubiquitin-conjugating enzyme E2D      | 0.182  | 1.135 | 3.85E-01 | 3.85E+01 |  |
| 7927669 | NM_003201    | TFAM      | transcription factor A, mitochondr    | 0.011  | 1.008 | 9.55E-01 | 9.55E+01 |  |
| 7927706 | ---          | ---       | ---                                   | -0.203 | 0.869 | 7.47E-01 | 7.47E+01 |  |
| 7927732 | NM_032199    | ARID5B    | AT rich interactive domain 5B (MR     | 0.055  | 1.039 | 5.53E-01 | 5.53E+01 |  |
| 7927767 | NM_032804    | ADO       | 2-aminoethanethiol (cysteamine)       | 0.188  | 1.139 | 9.78E-02 | 9.78E+00 |  |
| 7927775 | NM_030759    | NRBF2     | nuclear receptor binding factor 2     | 0.066  | 1.047 | 6.20E-01 | 6.20E+01 |  |
| 7927784 | NM_032776    | JMJD1C    | jumonji domain containing 1C          | 0.047  | 1.033 | 7.51E-01 | 7.51E+01 |  |
| 7927786 | NM_00100133  | REEP3     | receptor accessory protein 3          | 0.184  | 1.136 | 2.65E-01 | 2.65E+01 |  |
| 7927799 | ENST00000298 | REEP3     | receptor accessory protein 3          | 0.212  | 1.158 | 2.75E-01 | 2.75E+01 |  |
| 7927801 | NR_001446    | ANXA2P3   | annexin A2 pseudogene 3               | 0.129  | 1.094 | 2.23E-01 | 2.23E+01 |  |
| 7927814 | NM_012238    | SIRT1     | sirtuin (silent mating type informa   | -0.040 | 0.973 | 7.56E-01 | 7.56E+01 |  |
| 7927854 | NM_012207    | HNRNPH3   | heterogeneous nuclear ribonucleo      | 0.028  | 1.020 | 7.73E-01 | 7.73E+01 |  |
| 7927872 | ---          | ---       | ---                                   | 0.000  | 1.000 | 1.00E+00 | 1.00E+02 |  |
| 7927889 | NM_018237    | CCAR1     | cell division cycle and apoptosis re  | 0.032  | 1.023 | 7.64E-01 | 7.64E+01 |  |
| 7927926 | NM_024045    | DDX50     | DEAD (Asp-Glu-Ala-Asp) box polyp      | 0.043  | 1.030 | 7.56E-01 | 7.56E+01 |  |
| 7927936 | NM_004728    | DDX21     | DEAD (Asp-Glu-Ala-Asp) box polyp      | 0.066  | 1.047 | 6.48E-01 | 6.48E+01 |  |
| 7927955 | NM_015634    | KIAA1279  | KIAA1279                              | -0.067 | 0.955 | 7.88E-01 | 7.88E+01 |  |
| 7927964 | NM_002727    | SRGN      | serglycin                             | -0.029 | 0.980 | 9.23E-01 | 9.23E+01 |  |
| 7927972 | NM_004896    | VPS26A    | vacuolar protein sorting 26 homol     | 0.119  | 1.086 | 4.41E-01 | 4.41E+01 |  |
| 7927981 | NM_003171    | SUPV3L1   | suppressor of var1, 3-like 1 (S. cer  | -0.077 | 0.948 | 7.25E-01 | 7.25E+01 |  |
| 7928019 | NM_033500    | HK1       | hexokinase 1                          | 0.100  | 1.072 | 3.19E-01 | 3.19E+01 |  |
| 7928046 | NM_012339    | TSPAN15   | tetraspanin 15                        | -0.127 | 0.916 | 2.59E-01 | 2.59E+01 |  |
| 7928064 | NM_145306    | C10orf35  | chromosome 10 open reading fram       | 0.010  | 1.007 | 9.58E-01 | 9.58E+01 |  |
| 7928069 | NM_005203    | COL13A1   | collagen, type XIII, alpha 1          | 0.002  | 1.001 | 9.90E-01 | 9.90E+01 |  |
| 7928107 | NM_018649    | H2AFY2    | H2A histone family, member Y2         | 0.029  | 1.020 | 8.81E-01 | 8.81E+01 |  |
| 7928119 | NM_004096    | EIF4EBP2  | eukaryotic translation initiation fa  | 0.059  | 1.042 | 7.87E-01 | 7.87E+01 |  |
| 7928126 | NM_014431    | KIAA1274  | KIAA1274                              | 0.081  | 1.057 | 3.31E-01 | 3.31E+01 |  |
| 7928147 | NM_139155    | ADAMTS14  | ADAM metalloproteinase with thro      | 0.033  | 1.023 | 8.06E-01 | 8.06E+01 |  |
| 7928171 | NM_003901    | SGPL1     | sphingosine-1-phosphate lyase 1       | 0.315  | 1.244 | 4.01E-02 | 4.01E+00 |  |
| 7928189 | NM_170744    | UNC5B     | unc-5 homolog B (C. elegans)          | 0.004  | 1.003 | 9.77E-01 | 9.77E+01 |  |
| 7928208 | NM_018344    | SLC29A3   | solute carrier family 29 (nucleosid   | 0.036  | 1.025 | 8.30E-01 | 8.30E+01 |  |
| 7928216 | ---          | ---       | ---                                   | 0.002  | 1.001 | 9.92E-01 | 9.92E+01 |  |
| 7928291 | NM_004273    | CHST3     | carbohydrate (chondroitin 6) sulfo    | -0.084 | 0.943 | 3.47E-01 | 3.47E+01 |  |
| 7928300 | NM_173473    | C10orf104 | chromosome 10 open reading fram       | 0.054  | 1.038 | 6.76E-01 | 6.76E+01 |  |
| 7928306 | ---          | ---       | ---                                   | 0.148  | 1.108 | 5.91E-01 | 5.91E+01 |  |
| 7928318 | NM_138357    | CCDC109A  | coiled-coil domain containing 109     | -0.010 | 0.993 | 9.58E-01 | 9.58E+01 |  |
| 7928342 | NM_015901    | NUDT13    | nudix (nucleoside diphosphate lin     | 0.068  | 1.048 | 7.68E-01 | 7.68E+01 |  |
| 7928369 | NM_004922    | SEC24C    | SEC24 family, member C (S. cerevi     | 0.075  | 1.053 | 4.83E-01 | 4.83E+01 |  |
| 7928395 | NM_173540    | FUT11     | fucosyltransferase 11 (alpha (1,3)    | 0.023  | 1.016 | 9.22E-01 | 9.22E+01 |  |
| 7928401 | NM_203298    | CHCHD1    | coiled-coil-helix-coiled-coil-helix d | -0.017 | 0.988 | 9.54E-01 | 9.54E+01 |  |
| 7928408 | NM_015037    | KIAA0913  | KIAA0913                              | 0.010  | 1.007 | 9.62E-01 | 9.62E+01 |  |
| 7928411 | NM_015037    | KIAA0913  | KIAA0913                              | -0.007 | 0.995 | 9.67E-01 | 9.67E+01 |  |
| 7928429 | NM_002658    | PLAU      | plasminogen activator, urokinase      | -0.012 | 0.992 | 9.66E-01 | 9.66E+01 |  |
| 7928444 | NM_014000    | VCL       | vinculin                              | 0.099  | 1.071 | 4.29E-01 | 4.29E+01 |  |
| 7928471 | NM_006721    | ADK       | adenosine kinase                      | 0.058  | 1.041 | 7.72E-01 | 7.72E+01 |  |
| 7928489 | ---          | ---       | ---                                   | 0.006  | 1.004 | 9.87E-01 | 9.87E+01 |  |
| 7928491 | NM_012330    | MYST4     | MYST histone acetyltransferase (n     | 0.070  | 1.049 | 6.74E-01 | 6.74E+01 |  |
| 7928516 | NM_144660    | SAMD8     | sterile alpha motif domain contain    | 0.037  | 1.026 | 8.50E-01 | 8.50E+01 |  |
| 7928524 | NM_003375    | VDAC2     | voltage-dependent anion channel       | 0.004  | 1.003 | 9.88E-01 | 9.88E+01 |  |
| 7928529 | ---          | ---       | ---                                   | -0.036 | 0.975 | 8.49E-01 | 8.49E+01 |  |
| 7928531 | NR_024421    | C10orf41  | chromosome 10 open reading fram       | -0.033 | 0.977 | 9.28E-01 | 9.28E+01 |  |
| 7928547 | ---          | ---       | ---                                   | -0.007 | 0.995 | 9.66E-01 | 9.66E+01 |  |
| 7928551 | NM_033022    | RPS24     | ribosomal protein S24                 | 0.014  | 1.010 | 9.44E-01 | 9.44E+01 |  |
| 7928556 | ---          | ---       | ---                                   | -0.017 | 0.989 | 9.49E-01 | 9.49E+01 |  |
| 7928558 | NM_020338    | ZMIZ1     | zinc finger, MIZ-type containing 1    | 0.005  | 1.003 | 9.87E-01 | 9.87E+01 |  |
| 7928600 | NM_00109969  | EIF5AL1   | eukaryotic translation initiation fa  | -0.059 | 0.960 | 7.88E-01 | 7.88E+01 |  |
| 7928602 | NM_005411    | SFTPA1    | surfactant protein A1                 | -0.066 | 0.955 | 2.45E-01 | 2.45E+01 |  |
| 7928619 | NM_00109933  | FAM22A    | family with sequence similarity 22    | -0.044 | 0.970 | 5.37E-01 | 5.37E+01 |  |
| 7928630 | 0            | 0         | 0                                     | -0.080 | 0.946 | 6.91E-01 | 6.91E+01 |  |
| 7928632 | NM_005411    | SFTPA1    | surfactant protein A1                 | -0.066 | 0.955 | 2.45E-01 | 2.45E+01 |  |

|         |             |              |                                                           |        |       |          |          |  |
|---------|-------------|--------------|-----------------------------------------------------------|--------|-------|----------|----------|--|
| 7928645 | NM_00109933 | FAM22A       | family with sequence similarity 22                        | -0.070 | 0.952 | 2.51E-01 | 2.51E+01 |  |
| 7928653 | NM_00109933 | FAM22A       | family with sequence similarity 22                        | -0.059 | 0.960 | 3.78E-01 | 3.78E+01 |  |
| 7928679 | NM_00101297 | PLAC9        | placenta-specific 9                                       | -0.047 | 0.968 | 8.05E-01 | 8.05E+01 |  |
| 7928695 | NM_032333   | C10orf58     | chromosome 10 open reading frame                          | 0.159  | 1.116 | 4.27E-01 | 4.27E+01 |  |
| 7928705 | NM_030927   | TSPAN14      | tetraspanin 14                                            | 0.056  | 1.040 | 7.52E-01 | 7.52E+01 |  |
| 7928752 | NM_014394   | GHITM        | growth hormone inducible transmembrane                    | -0.011 | 0.992 | 9.63E-01 | 9.63E+01 |  |
| 7928766 | NM_207373   | C10orf99     | chromosome 10 open reading frame                          | -0.077 | 0.948 | 4.04E-01 | 4.04E+01 |  |
| 7928789 | NM_002921   | RGR          | retinal G protein coupled receptor                        | 0.023  | 1.016 | 8.78E-01 | 8.78E+01 |  |
| 7928800 | NM_018999   | FAM190B      | family with sequence similarity 19                        | -0.179 | 0.883 | 9.48E-02 | 9.48E+00 |  |
| 7928821 | ---         | ---          | ---                                                       | 0.202  | 1.150 | 5.39E-01 | 5.39E+01 |  |
| 7928823 | NM_00103001 | OPN4         | opsin 4                                                   | -0.002 | 0.998 | 9.86E-01 | 9.86E+01 |  |
| 7928838 | NM_007078   | LDB3         | LIM domain binding 3                                      | -0.074 | 0.950 | 3.46E-01 | 3.46E+01 |  |
| 7928870 | ---         | ---          | ---                                                       | -0.101 | 0.932 | 4.15E-01 | 4.15E+01 |  |
| 7928872 | NM_003087   | SNCG         | synuclein, gamma (breast cancer-susceptible)              | -0.049 | 0.967 | 4.87E-01 | 4.87E+01 |  |
| 7928882 | NM_006829   | C10orf116    | chromosome 10 open reading frame                          | -0.112 | 0.925 | 8.28E-02 | 8.28E+00 |  |
| 7928890 | NM_133447   | AGAP11       | ankyrin repeat and GTPase domain                          | 0.033  | 1.023 | 7.15E-01 | 7.15E+01 |  |
| 7928907 | ---         | ---          | ---                                                       | 0.378  | 1.299 | 1.07E-01 | 1.07E+01 |  |
| 7928909 | NM_019054   | FAM35A       | family with sequence similarity 35                        | 0.257  | 1.195 | 4.07E-02 | 4.07E+00 |  |
| 7928915 | NM_00109933 | FAM22A       | family with sequence similarity 22                        | -0.038 | 0.974 | 6.45E-01 | 6.45E+01 |  |
| 7928937 | NM_004897   | MINPP1       | multiple inositol polyphosphate kinase                    | 0.211  | 1.157 | 3.73E-01 | 3.73E+01 |  |
| 7928944 | NM_004670   | PAPSS2       | 3'-phosphoadenosine 5'-phosphotransferase                 | -0.336 | 0.792 | 3.50E-01 | 3.50E+01 |  |
| 7928959 | NM_000314   | PTEN         | phosphatase and tensin homolog                            | 0.048  | 1.034 | 6.66E-01 | 6.66E+01 |  |
| 7929012 | NM_020799   | STAMBP1      | STAM binding protein-like 1                               | 0.230  | 1.173 | 4.68E-02 | 4.68E+00 |  |
| 7929026 | NM_00114194 | ACTA2        | actin, alpha 2, smooth muscle, aorta                      | 0.106  | 1.076 | 4.67E-01 | 4.67E+01 |  |
| 7929032 | NM_000043   | FAS          | Fas (TNF receptor superfamily, member 6)                  | 0.009  | 1.006 | 9.78E-01 | 9.78E+01 |  |
| 7929047 | NM_001547   | IFIT2        | interferon-induced protein with tetratricopeptide repeats | 0.380  | 1.301 | 3.75E-01 | 3.75E+01 |  |
| 7929052 | NM_00103168 | IFIT3        | interferon-induced protein with tetratricopeptide repeats | 0.716  | 1.643 | 1.09E-01 | 1.09E+01 |  |
| 7929065 | NM_001548   | IFIT1        | interferon-induced protein with tetratricopeptide repeats | 0.596  | 1.511 | 4.36E-01 | 4.36E+01 |  |
| 7929072 | NM_012420   | IFIT5        | interferon-induced protein with tetratricopeptide repeats | 0.200  | 1.149 | 5.34E-01 | 5.34E+01 |  |
| 7929114 | ---         | ---          | ---                                                       | -0.041 | 0.972 | 7.67E-01 | 7.67E+01 |  |
| 7929116 | NM_006413   | RPP30        | ribonuclease P/MRP 30kDa subunit                          | 0.112  | 1.081 | 4.35E-01 | 4.35E+01 |  |
| 7929130 | ---         | ---          | ---                                                       | 0.117  | 1.085 | 3.70E-01 | 3.70E+01 |  |
| 7929132 | NM_032373   | PCGF5        | polycomb group ring finger 5                              | 0.089  | 1.064 | 2.65E-01 | 2.65E+01 |  |
| 7929168 | NM_025235   | TNKS2        | tankyrase, TRF1-interacting ankyrin repeat domain         | 0.064  | 1.046 | 6.14E-01 | 6.14E+01 |  |
| 7929201 | NM_003972   | BTA1F        | BTA1F RNA polymerase II, B-TFIIID                         | 0.002  | 1.001 | 9.91E-01 | 9.91E+01 |  |
| 7929243 | NM_017838   | NHP2         | NHP2 ribonucleoprotein homolog                            | 0.016  | 1.011 | 9.42E-01 | 9.42E+01 |  |
| 7929247 | NM_017824   | 40242        | membrane-associated ring finger                           | 0.006  | 1.004 | 9.81E-01 | 9.81E+01 |  |
| 7929256 | ---         | ---          | ---                                                       | 0.126  | 1.091 | 7.27E-01 | 7.27E+01 |  |
| 7929282 | NM_002729   | HHEX         | hematopoietically expressed homeobox                      | 0.310  | 1.240 | 8.99E-04 | 8.99E-02 |  |
| 7929288 | NM_019053   | EXOC6        | exocyst complex component 6                               | 0.129  | 1.093 | 3.70E-01 | 3.70E+01 |  |
| 7929315 | NM_183374   | CYP26C1      | cytochrome P450, family 26, subfamily 1                   | -0.019 | 0.987 | 8.88E-01 | 8.88E+01 |  |
| 7929383 | NM_00113465 | TMEM20       | transmembrane protein 20                                  | -0.018 | 0.987 | 9.53E-01 | 9.53E+01 |  |
| 7929511 | NM_001776   | ENTPD1       | ectonucleoside triphosphate diphosphatase                 | 0.219  | 1.164 | 4.66E-01 | 4.66E+01 |  |
| 7929550 | NM_00113437 | CCNJ         | cyclin J                                                  | -0.007 | 0.995 | 9.76E-01 | 9.76E+01 |  |
| 7929562 | NM_014803   | ZNF518A      | zinc finger protein 518A                                  | 0.159  | 1.116 | 2.30E-01 | 2.30E+01 |  |
| 7929589 | ---         | ---          | ---                                                       | 0.039  | 1.027 | 8.62E-01 | 8.62E+01 |  |
| 7929593 | NR_026712   | RPL13AP5     | ribosomal protein L13a pseudogene                         | -0.008 | 0.994 | 9.64E-01 | 9.64E+01 |  |
| 7929596 | NM_032440   | LCOR         | ligand dependent nuclear receptor                         | -0.038 | 0.974 | 7.67E-01 | 7.67E+01 |  |
| 7929609 | BC024315    | C10orf12     | chromosome 10 open reading frame                          | -0.027 | 0.981 | 8.92E-01 | 8.92E+01 |  |
| 7929616 | NM_005479   | FRAT1        | frequently rearranged in advanced                         | -0.001 | 0.999 | 9.98E-01 | 9.98E+01 |  |
| 7929624 | NM_002629   | PGAM1        | phosphoglycerate mutase 1 (brain)                         | -0.015 | 0.990 | 9.46E-01 | 9.46E+01 |  |
| 7929634 | NM_198046   | ZDHHC16      | zinc finger, DHHC-type containing                         | -0.117 | 0.922 | 4.02E-01 | 4.02E+01 |  |
| 7929649 | NM_024954   | UBTD1        | ubiquitin domain containing 1                             | 0.082  | 1.059 | 4.02E-01 | 4.02E+01 |  |
| 7929653 | NM_020349   | ANKRD2       | ankyrin repeat domain 2 (stretch rich)                    | -0.007 | 0.995 | 9.63E-01 | 9.63E+01 |  |
| 7929664 | NM_138413   | DHDPSL       | dihydrodipicolinate synthase-like,                        | 0.042  | 1.030 | 6.80E-01 | 6.80E+01 |  |
| 7929677 | NM_018425   | PI4K2A       | phosphatidylinositol 4-kinase type                        | 0.204  | 1.152 | 6.71E-02 | 6.71E+00 |  |
| 7929689 | NR_026753   | MARVELD1     | MARVEL domain containing 1                                | 0.069  | 1.049 | 4.97E-01 | 4.97E+01 |  |
| 7929692 | NM_00100226 | ZFYVE27      | zinc finger, FYVE domain containing                       | 0.003  | 1.002 | 9.88E-01 | 9.88E+01 |  |
| 7929711 | NM_00101091 | GOLGA7B      | golgi autoantigen, golgin subfamily                       | 0.037  | 1.026 | 8.24E-01 | 8.24E+01 |  |
| 7929719 | NM_014472   | C10orf28     | chromosome 10 open reading frame                          | -0.018 | 0.987 | 9.34E-01 | 9.34E+01 |  |
| 7929744 | NM_145285   | NKX2-3       | NK2 transcription factor related, like                    | -0.067 | 0.954 | 4.83E-01 | 4.83E+01 |  |
| 7929750 | NM_020354   | ENTPD7       | ectonucleoside triphosphate diphosphatase                 | -0.172 | 0.888 | 4.33E-02 | 4.33E+00 |  |
| 7929768 | NM_015960   | CUTC         | cutC copper transporter homolog                           | -0.024 | 0.983 | 8.93E-01 | 8.93E+01 |  |
| 7929779 | NM_000392   | ABCC2        | ATP-binding cassette, sub-family C                        | -0.045 | 0.969 | 7.87E-01 | 7.87E+01 |  |
| 7929816 | NM_005063   | SCD          | stearoyl-CoA desaturase (delta-9-desaturase)              | 0.149  | 1.109 | 4.45E-01 | 4.45E+01 |  |
| 7929822 | NM_003393   | WNT8B        | wingless-type MMTV integration site                       | -0.043 | 0.971 | 8.38E-01 | 8.38E+01 |  |
| 7929840 | NM_003987   | PAX2         | paired box 2                                              | -0.035 | 0.976 | 6.57E-01 | 6.57E+01 |  |
| 7929858 | NM_018121   | FAM178A      | family with sequence similarity 17                        | 0.135  | 1.098 | 7.05E-02 | 7.05E+00 |  |
| 7929882 | NM_017893   | SEMA4G       | sema domain, immunoglobulin domain                        | -0.049 | 0.967 | 6.58E-01 | 6.58E+01 |  |
| 7929901 | NM_021830   | C10orf2      | chromosome 10 open reading frame                          | -0.025 | 0.983 | 9.33E-01 | 9.33E+01 |  |
| 7929911 | NM_032429   | LZTS2        | leucine zipper, putative tumor suppressor                 | -0.044 | 0.970 | 5.52E-01 | 5.52E+01 |  |
| 7929919 | NM_030971   | SFXN3        | sideroflexin 3                                            | 0.053  | 1.038 | 7.56E-01 | 7.56E+01 |  |
| 7929932 | NM_030929   | KAZALD1      | Kazal-type serine peptidase inhibitor                     | 0.012  | 1.008 | 9.54E-01 | 9.54E+01 |  |
| 7929945 | ---         | ---          | ---                                                       | -0.021 | 0.986 | 9.00E-01 | 9.00E+01 |  |
| 7929958 | NM_033637   | BTRC         | beta-transducin repeat containing                         | 0.007  | 1.005 | 9.77E-01 | 9.77E+01 |  |
| 7929976 | NM_015448   | RP11-52910.4 | deleted in a mouse model of primordial                    | -0.079 | 0.947 | 7.03E-01 | 7.03E+01 |  |
| 7929988 | NM_024747   | HPS6         | Hermansky-Pudlak syndrome 6                               | -0.095 | 0.936 | 3.66E-01 | 3.66E+01 |  |



|         |             |             |                                       |        |       |          |          |  |  |
|---------|-------------|-------------|---------------------------------------|--------|-------|----------|----------|--|--|
| 7929990 | NM_015062   | PPRC1       | peroxisome proliferator-activated     | 0.013  | 1.009 | 9.47E-01 | 9.47E+01 |  |  |
| 7930008 | NM_004741   | NOLC1       | nucleolar and coiled-body phosph      | -0.062 | 0.958 | 7.44E-01 | 7.44E+01 |  |  |
| 7930031 | NM_004193   | GBF1        | golgi-specific brefeldin A resistant  | -0.022 | 0.985 | 9.09E-01 | 9.09E+01 |  |  |
| 7930074 | NM_002502   | NFKB2       | nuclear factor of kappa light polyp   | -0.148 | 0.903 | 1.63E-01 | 1.63E+01 |  |  |
| 7930099 | NM_024326   | FBXL15      | F-box and leucine-rich repeat prot    | 0.001  | 1.001 | 9.96E-01 | 9.96E+01 |  |  |
| 7930106 | NM_024789   | TMEM180     | transmembrane protein 180             | -0.025 | 0.983 | 8.56E-01 | 8.56E+01 |  |  |
| 7930120 | NM_016169   | SUFU        | suppressor of fused homolog (Dro      | -0.022 | 0.985 | 8.57E-01 | 8.57E+01 |  |  |
| 7930139 | NM_030912   | TRIM8       | tripartite motif-containing 8         | -0.052 | 0.964 | 7.27E-01 | 7.27E+01 |  |  |
| 7930148 | NM_178858   | SFXN2       | sideroflexin 2                        | 0.007  | 1.005 | 9.78E-01 | 9.78E+01 |  |  |
| 7930162 | NM_017787   | C10orf26    | chromosome 10 open reading fram       | 0.141  | 1.103 | 1.91E-01 | 1.91E+01 |  |  |
| 7930168 | ---         | ---         | ---                                   | 0.078  | 1.055 | 7.06E-01 | 7.06E+01 |  |  |
| 7930170 | NM_00113620 | C10orf32    | chromosome 10 open reading fram       | 0.068  | 1.048 | 7.25E-01 | 7.25E+01 |  |  |
| 7930179 | ---         | ---         | ---                                   | 0.008  | 1.006 | 9.91E-01 | 9.91E+01 |  |  |
| 7930181 | NM_020682   | AS3MT       | arsenic (+3 oxidation state) methy    | 0.001  | 1.001 | 9.99E-01 | 9.99E+01 |  |  |
| 7930194 | NM_017649   | CNNM2       | cyclin M2                             | 0.004  | 1.003 | 9.84E-01 | 9.84E+01 |  |  |
| 7930205 | NM_00114390 | hCG_2024410 | rcRPE                                 | 0.059  | 1.041 | 8.10E-01 | 8.10E+01 |  |  |
| 7930213 | NM_006951   | TAF5        | TAF5 RNA polymerase II, TATA box      | 0.002  | 1.002 | 9.90E-01 | 9.90E+01 |  |  |
| 7930226 | NM_014976   | PDCD11      | programmed cell death 11              | -0.011 | 0.993 | 9.57E-01 | 9.57E+01 |  |  |
| 7930264 | NM_004210   | NEURL       | neuralized homolog (Drosophila)       | -0.027 | 0.982 | 7.99E-01 | 7.99E+01 |  |  |
| 7930276 | NM_014720   | SLK         | STE20-like kinase (yeast)             | 0.015  | 1.010 | 9.20E-01 | 9.20E+01 |  |  |
| 7930304 | NM_004832   | GSTO1       | glutathione S-transferase omega 1     | -0.101 | 0.932 | 7.09E-01 | 7.09E+01 |  |  |
| 7930311 | NM_183239   | GSTO2       | glutathione S-transferase omega 2     | -0.034 | 0.977 | 8.52E-01 | 8.52E+01 |  |  |
| 7930341 | NM_014978   | SORCS3      | sortilin-related VPS10 domain con     | -0.012 | 0.992 | 9.47E-01 | 9.47E+01 |  |  |
| 7930376 | ---         | ---         | ---                                   | -0.027 | 0.981 | 8.78E-01 | 8.78E+01 |  |  |
| 7930380 | NM_016824   | ADD3        | adducin 3 (gamma)                     | 0.055  | 1.039 | 6.75E-01 | 6.75E+01 |  |  |
| 7930398 | NM_005962   | MXI1        | MAX interactor 1                      | -0.143 | 0.906 | 1.05E-01 | 1.05E+01 |  |  |
| 7930413 | NM_004419   | DUSP5       | dual specificity phosphatase 5        | -0.314 | 0.804 | 7.94E-03 | 7.94E-01 |  |  |
| 7930422 | NM_005445   | SMC3        | structural maintenance of chromo      | -0.010 | 0.993 | 9.48E-01 | 9.48E+01 |  |  |
| 7930450 | ---         | ---         | ---                                   | 0.124  | 1.090 | 6.78E-01 | 6.78E+01 |  |  |
| 7930454 | NM_145341   | PDCD4       | programmed cell death 4 (neoplas      | -0.143 | 0.906 | 2.04E-02 | 2.04E+00 |  |  |
| 7930470 | NM_007373   | SHOC2       | soc-2 suppressor of clear homolog     | 0.073  | 1.052 | 5.35E-01 | 5.35E+01 |  |  |
| 7930482 | NM_000681   | ADRA2A      | adrenergic, alpha-2A-, receptor       | 0.015  | 1.010 | 9.10E-01 | 9.10E+01 |  |  |
| 7930498 | NM_016234   | ACSL5       | acyl-CoA synthetase long-chain fa     | -0.092 | 0.938 | 6.20E-01 | 6.20E+01 |  |  |
| 7930524 | NM_145206   | VT1A        | vesicle transport through interact    | 0.017  | 1.012 | 9.51E-01 | 9.51E+01 |  |  |
| 7930537 | NM_00114627 | TCF7L2      | transcription factor 7-like 2 (T-cell | 0.289  | 1.222 | 3.64E-01 | 3.64E+01 |  |  |
| 7930559 | ---         | ---         | ---                                   | 0.022  | 1.015 | 9.50E-01 | 9.50E+01 |  |  |
| 7930561 | NM_004132   | HABP2       | hyaluronan binding protein 2          | 0.025  | 1.017 | 8.37E-01 | 8.37E+01 |  |  |
| 7930577 | NM_033338   | CASP7       | caspase 7, apoptosis-related cyste    | 0.221  | 1.166 | 1.63E-01 | 1.63E+01 |  |  |
| 7930614 | NM_198514   | NHLRC2      | NHL repeat containing 2               | 0.023  | 1.016 | 8.85E-01 | 8.85E+01 |  |  |
| 7930627 | NM_000684   | ADRB1       | adrenergic, beta-1-, receptor         | -0.016 | 0.989 | 9.24E-01 | 9.24E+01 |  |  |
| 7930663 | NM_198496   | VWA2        | von Willebrand factor A domain co     | 0.000  | 1.000 | 1.00E+00 | 1.00E+02 |  |  |
| 7930682 | NM_020940   | FAM160B1    | family with sequence similarity 16    | -0.091 | 0.939 | 4.38E-01 | 4.38E+01 |  |  |
| 7930703 | NM_139169   | TRUB1       | TruB pseudouridine (psi) synthase     | 0.008  | 1.006 | 9.76E-01 | 9.76E+01 |  |  |
| 7930790 | NM_006229   | PNLIPRP1    | pancreatic lipase-related protein 1   | -0.001 | 0.999 | 9.93E-01 | 9.93E+01 |  |  |
| 7930870 | NM_020243   | TOMM22      | translocase of outer mitochondria     | 0.164  | 1.121 | 6.06E-01 | 6.06E+01 |  |  |
| 7930872 | NM_199461   | NANOS1      | nanos homolog 1 (Drosophila)          | 0.025  | 1.017 | 8.54E-01 | 8.54E+01 |  |  |
| 7930880 | ---         | ---         | ---                                   | 0.032  | 1.023 | 9.16E-01 | 9.16E+01 |  |  |
| 7930882 | NM_207009   | FAM45A      | family with sequence similarity 45    | -0.221 | 0.858 | 7.53E-02 | 7.53E+00 |  |  |
| 7930894 | NM_005308   | GRK5        | G protein-coupled receptor kinase     | -0.167 | 0.890 | 3.07E-01 | 3.07E+01 |  |  |
| 7930915 | ---         | ---         | ---                                   | 0.042  | 1.030 | 9.53E-01 | 9.53E+01 |  |  |
| 7930919 | ---         | ---         | ---                                   | 0.031  | 1.022 | 8.58E-01 | 8.58E+01 |  |  |
| 7930921 | NM_004281   | BAG3        | BCL2-associated athanogene 3          | -0.009 | 0.994 | 9.66E-01 | 9.66E+01 |  |  |
| 7930927 | NM_014937   | INPP5F      | inositol polyphosphate-5-phospha      | 0.099  | 1.071 | 7.10E-01 | 7.10E+01 |  |  |
| 7930956 | NM_007190   | SEC23IP     | SEC23 interacting protein             | 0.124  | 1.090 | 9.25E-02 | 9.25E+00 |  |  |
| 7930994 | BC108662    | C10orf85    | chromosome 10 open reading fram       | -0.023 | 0.984 | 8.62E-01 | 8.62E+01 |  |  |
| 7930996 | NM_018117   | BRWD2       | bromodomain and WD repeat dor         | 0.238  | 1.180 | 3.90E-02 | 3.90E+00 |  |  |
| 7931081 | NM_021622   | PLEKHA1     | pleckstrin homology domain conta      | 0.064  | 1.045 | 7.60E-01 | 7.60E+01 |  |  |
| 7931097 | NM_002775   | HTRA1       | HtrA serine peptidase 1               | 0.010  | 1.007 | 9.53E-01 | 9.53E+01 |  |  |
| 7931140 | NR_003570   | FLJ46361    | deleted in malignant brain tumors     | -0.007 | 0.995 | 9.76E-01 | 9.76E+01 |  |  |
| 7931159 | NM_153336   | PSTK        | phosphoseryl-tRNA kinase              | -0.094 | 0.937 | 4.51E-01 | 4.51E+01 |  |  |
| 7931181 | NM_00110557 | HMX3        | H6 family homeobox 3                  | -0.108 | 0.928 | 2.75E-01 | 2.75E+01 |  |  |
| 7931184 | NM_005519   | HMX2        | H6 family homeobox 2                  | -0.039 | 0.974 | 7.32E-01 | 7.32E+01 |  |  |
| 7931187 | NM_004725   | BUB3        | budding uninhibited by benzimida      | -0.001 | 0.999 | 9.98E-01 | 9.98E+01 |  |  |
| 7931204 | NM_022126   | LHPP        | phospholysine phosphohistidine in     | 0.006  | 1.004 | 9.78E-01 | 9.78E+01 |  |  |
| 7931216 | NM_032182   | FAM175B     | family with sequence similarity 17    | 0.054  | 1.038 | 7.03E-01 | 7.03E+01 |  |  |
| 7931226 | NM_017580   | ZRANB1      | zinc finger, RAN-binding domain c     | -0.023 | 0.984 | 9.10E-01 | 9.10E+01 |  |  |
| 7931239 | NM_015608   | C10orf137   | chromosome 10 open reading fram       | 0.009  | 1.006 | 9.58E-01 | 9.58E+01 |  |  |
| 7931268 | NM_016567   | BCCIP       | BRCA2 and CDKN1A interacting pr       | 0.005  | 1.003 | 9.85E-01 | 9.85E+01 |  |  |
| 7931348 | NM_207426   | FOXI2       | forkhead box I2                       | -0.025 | 0.983 | 8.62E-01 | 8.62E+01 |  |  |
| 7931353 | NM_006504   | PTPRE       | protein tyrosine phosphatase, rec     | 0.199  | 1.148 | 5.15E-01 | 5.15E+01 |  |  |
| 7931379 | NM_002412   | MGMT        | O-6-methylguanine-DNA methyltr        | -0.062 | 0.958 | 4.42E-01 | 4.42E+01 |  |  |
| 7931387 | ---         | ---         | ---                                   | -0.057 | 0.961 | 7.83E-01 | 7.83E+01 |  |  |
| 7931393 | NM_006541   | GLRX3       | glutaredoxin 3                        | -0.019 | 0.987 | 9.48E-01 | 9.48E+01 |  |  |
| 7931405 | NM_018461   | PPP2R2D     | protein phosphatase 2, regulatory     | -0.012 | 0.991 | 9.51E-01 | 9.51E+01 |  |  |
| 7931417 | NM_00110552 | JAKMIP3     | Janus kinase and microtubule inte     | -0.043 | 0.971 | 6.15E-01 | 6.15E+01 |  |  |
| 7931439 | NM_006426   | DPYSL4      | dihydropyrimidinase-like 4            | 0.002  | 1.001 | 9.91E-01 | 9.91E+01 |  |  |
| 7931455 | NM_00114375 | LRRC27      | leucine rich repeat containing 27     | -0.030 | 0.980 | 8.62E-01 | 8.62E+01 |  |  |

|         |              |           |                                                |        |       |          |          |  |
|---------|--------------|-----------|------------------------------------------------|--------|-------|----------|----------|--|
| 7931469 | NM_138499    | PWWP2B    | PWWP domain containing 2B                      | 0.017  | 1.012 | 8.96E-01 | 8.96E+01 |  |
| 7931479 | NM_005539    | INPP5A    | inositol polyphosphate-5-phosphatase           | -0.060 | 0.959 | 6.58E-01 | 6.58E+01 |  |
| 7931500 | NM_00108390  | GPR123    | G protein-coupled receptor 123                 | -0.018 | 0.988 | 9.15E-01 | 9.15E+01 |  |
| 7931519 | NM_152643    | KNDC1     | kinase non-catalytic C-lobe domain             | -0.050 | 0.966 | 5.59E-01 | 5.59E+01 |  |
| 7931553 | NM_003577    | UTF1      | undifferentiated embryonic cell transcript     | -0.041 | 0.972 | 6.49E-01 | 6.49E+01 |  |
| 7931556 | NM_014468    | VENTX     | VENT homeobox homolog (Xenopus laevis)         | 0.019  | 1.014 | 9.16E-01 | 9.16E+01 |  |
| 7931561 | NM_145806    | ZNF511    | zinc finger protein 511                        | -0.025 | 0.983 | 9.11E-01 | 9.11E+01 |  |
| 7931571 | NM_145202    | PRAP1     | proline-rich acidic protein 1                  | -0.032 | 0.978 | 7.94E-01 | 7.94E+01 |  |
| 7931582 | NM_152911    | PAOX      | polyamine oxidase (exo-N4-aminooxylase)        | -0.013 | 0.991 | 9.21E-01 | 9.21E+01 |  |
| 7931607 | NM_138384    | MTG1      | mitochondrial GTPase 1 homolog                 | 0.006  | 1.004 | 9.80E-01 | 9.80E+01 |  |
| 7931623 | NR_002934    | LOC619207 | scavenger receptor protein family              | -0.021 | 0.985 | 8.93E-01 | 8.93E+01 |  |
| 7931643 | NM_000773    | CYP2E1    | cytochrome P450, family 2, subfamily 1         | 0.030  | 1.021 | 8.30E-01 | 8.30E+01 |  |
| 7931656 | NM_033178    | DUX4      | double homeobox, 4                             | -0.010 | 0.993 | 9.56E-01 | 9.56E+01 |  |
| 7931659 | NM_033178    | DUX4      | double homeobox, 4                             | -0.010 | 0.993 | 9.56E-01 | 9.56E+01 |  |
| 7931662 | NM_033178    | DUX4      | double homeobox, 4                             | -0.010 | 0.993 | 9.56E-01 | 9.56E+01 |  |
| 7931665 | NM_033178    | DUX4      | double homeobox, 4                             | -0.017 | 0.989 | 9.16E-01 | 9.16E+01 |  |
| 7931668 | NM_033178    | DUX4      | double homeobox, 4                             | -0.010 | 0.993 | 9.56E-01 | 9.56E+01 |  |
| 7931671 | NM_033178    | DUX4      | double homeobox, 4                             | -0.010 | 0.993 | 9.56E-01 | 9.56E+01 |  |
| 7931681 | ---          | ---       | ---                                            | -0.109 | 0.927 | 7.32E-01 | 7.32E+01 |  |
| 7931683 | NM_014974    | DIP2C     | DIP2 disco-interacting protein 2 homolog       | -0.004 | 0.997 | 9.80E-01 | 9.80E+01 |  |
| 7931726 | ---          | ---       | ---                                            | 0.144  | 1.105 | 5.74E-01 | 5.74E+01 |  |
| 7931728 | NM_015155    | LARP4B    | La ribonucleoprotein domain family             | 0.169  | 1.124 | 1.44E-02 | 1.44E+00 |  |
| 7931754 | NM_004508    | IDI1      | isopentenyl-diphosphate delta isomerase        | -0.022 | 0.985 | 9.17E-01 | 9.17E+01 |  |
| 7931764 | NM_018702    | ADARB2    | adenosine deaminase, RNA-specific              | 0.008  | 1.006 | 9.63E-01 | 9.63E+01 |  |
| 7931778 | NM_014889    | PITRM1    | pitrilysin metallopeptidase 1                  | -0.103 | 0.931 | 2.39E-01 | 2.39E+01 |  |
| 7931810 | NM_001300    | KLF6      | Kruppel-like factor 6                          | -0.053 | 0.964 | 7.71E-01 | 7.71E+01 |  |
| 7931859 | NM_017422    | CALML5    | calmodulin-like 5                              | -0.030 | 0.979 | 8.06E-01 | 8.06E+01 |  |
| 7931863 | NM_024701    | ASB13     | ankyrin repeat and SOCS box-containing protein | -0.011 | 0.992 | 9.56E-01 | 9.56E+01 |  |
| 7931873 | NM_001494    | GDI2      | GDP dissociation inhibitor 2                   | 0.129  | 1.094 | 8.70E-02 | 8.70E+00 |  |
| 7931888 | NM_019046    | ANKRD16   | ankyrin repeat domain 16                       | 0.034  | 1.024 | 8.47E-01 | 8.47E+01 |  |
| 7931899 | NM_002189    | IL15RA    | interleukin 15 receptor, alpha                 | -0.094 | 0.937 | 6.51E-01 | 6.51E+01 |  |
| 7931928 | ---          | ---       | ---                                            | -0.504 | 0.705 | 9.26E-02 | 9.26E+00 |  |
| 7931930 | NM_006257    | PRKCQ     | protein kinase C, theta                        | -0.107 | 0.928 | 4.81E-01 | 4.81E+01 |  |
| 7931951 | NM_00102988  | SFMBT2    | Scm-like with four mbt domains 2               | -0.008 | 0.995 | 9.78E-01 | 9.78E+01 |  |
| 7931977 | NM_030569    | ITIH5     | inter-alpha (globulin) inhibitor H5            | -0.002 | 0.999 | 9.90E-01 | 9.90E+01 |  |
| 7932014 | NR_024256    | FLJ45983  | hypothetical LOC399717                         | -0.072 | 0.951 | 5.55E-01 | 5.55E+01 |  |
| 7932019 | ENST00000379 | C10orf31  | chromosome 10 open reading frame               | 0.148  | 1.108 | 7.77E-02 | 7.77E+00 |  |
| 7932041 | NM_080599    | UPF2      | UPF2 regulator of nonsense transcripts         | 0.020  | 1.014 | 8.83E-01 | 8.83E+01 |  |
| 7932086 | ---          | ---       | ---                                            | -0.049 | 0.966 | 7.59E-01 | 7.59E+01 |  |
| 7932094 | NM_006214    | PHYH      | phytanoyl-CoA 2-hydroxylase                    | 0.116  | 1.084 | 4.03E-01 | 4.03E+01 |  |
| 7932109 | NM_012247    | SEPHS1    | selenophosphate synthetase 1                   | 0.032  | 1.023 | 8.92E-01 | 8.92E+01 |  |
| 7932160 | BC072452     | FAM107B   | family with sequence similarity 10             | 0.055  | 1.039 | 5.36E-01 | 5.36E+01 |  |
| 7932177 | NM_00102995  | CDNF      | cerebral dopamine neurotrophic factor          | -0.021 | 0.986 | 9.29E-01 | 9.29E+01 |  |
| 7932186 | NM_00103385  | DCLRE1C   | DNA cross-link repair 1C (PSO2 homolog)        | 0.231  | 1.174 | 1.11E-02 | 1.11E+00 |  |
| 7932209 | ---          | ---       | ---                                            | 0.014  | 1.010 | 9.68E-01 | 9.68E+01 |  |
| 7932221 | BC029034     | C10orf111 | chromosome 10 open reading frame               | -0.097 | 0.935 | 1.63E-01 | 1.63E+01 |  |
| 7932227 | NM_004808    | NMT2      | N-myristoyltransferase 2                       | 0.104  | 1.075 | 6.24E-01 | 6.24E+01 |  |
| 7932243 | NM_00101092  | FAM171A1  | family with sequence similarity 17             | 0.012  | 1.008 | 9.53E-01 | 9.53E+01 |  |
| 7932285 | NM_024948    | FAM188A   | family with sequence similarity 18             | 0.010  | 1.007 | 9.57E-01 | 9.57E+01 |  |
| 7932308 | NM_00101090  | C1QL3     | complement component 1, q subcomponent         | 0.003  | 1.002 | 9.89E-01 | 9.89E+01 |  |
| 7932311 | NM_012425    | RSU1      | Ras suppressor protein 1                       | 0.099  | 1.071 | 4.49E-01 | 4.49E+01 |  |
| 7932326 | NM_001081    | CUBN      | cubilin (intrinsic factor-cobalamin receptor)  | -0.019 | 0.987 | 9.70E-01 | 9.70E+01 |  |
| 7932433 | NM_182543    | NSUN6     | NOL1/NOP2/Sun domain family, member 6          | 0.157  | 1.115 | 3.10E-01 | 3.10E+01 |  |
| 7932495 | NM_00101091  | C10orf114 | chromosome 10 open reading frame               | -0.050 | 0.966 | 7.38E-01 | 7.38E+01 |  |
| 7932498 | NM_207371    | C10orf140 | chromosome 10 open reading frame               | -0.009 | 0.994 | 9.54E-01 | 9.54E+01 |  |
| 7932510 | ---          | ---       | ---                                            | 0.129  | 1.093 | 7.07E-01 | 7.07E+01 |  |
| 7932512 | NM_022365    | DNAJC1    | DnaJ (Hsp40) homolog, subfamily 1              | -0.095 | 0.937 | 4.21E-01 | 4.21E+01 |  |
| 7932530 | NM_005028    | PIP4K2A   | phosphatidylinositol-5-phosphate 4-kinase      | 0.073  | 1.052 | 5.15E-01 | 5.15E+01 |  |
| 7932548 | ---          | ---       | ---                                            | 0.020  | 1.014 | 9.54E-01 | 9.54E+01 |  |
| 7932554 | NM_020824    | ARHGAP21  | Rho GTPase activating protein 21               | 0.183  | 1.136 | 1.02E-01 | 1.02E+01 |  |
| 7932612 | ---          | ---       | ---                                            | 0.053  | 1.037 | 7.15E-01 | 7.15E+01 |  |
| 7932616 | NM_005470    | ABI1      | abl-interactor 1                               | 0.102  | 1.073 | 3.68E-01 | 3.68E+01 |  |
| 7932635 | ---          | ---       | ---                                            | 0.103  | 1.074 | 6.37E-01 | 6.37E+01 |  |
| 7932678 | NM_139312    | YME1L1    | YME1-like 1 (S. cerevisiae)                    | -0.019 | 0.987 | 8.80E-01 | 8.80E+01 |  |
| 7932703 | NM_145698    | ACBD5     | acyl-Coenzyme A binding domain containing 5    | 0.105  | 1.076 | 4.67E-01 | 4.67E+01 |  |
| 7932765 | NM_173496    | MPP7      | membrane protein, palmitoylated                | -0.087 | 0.941 | 6.91E-01 | 6.91E+01 |  |
| 7932788 | ---          | ---       | ---                                            | -0.006 | 0.996 | 9.78E-01 | 9.78E+01 |  |
| 7932792 | ---          | ---       | ---                                            | 0.096  | 1.069 | 3.44E-01 | 3.44E+01 |  |
| 7932794 | ---          | ---       | ---                                            | 0.004  | 1.002 | 9.88E-01 | 9.88E+01 |  |
| 7932796 | NM_021738    | SVIL      | supervillin                                    | -0.073 | 0.951 | 5.29E-01 | 5.29E+01 |  |
| 7932834 | NM_018109    | MTPAP     | mitochondrial poly(A) polymerase               | 0.082  | 1.058 | 2.56E-01 | 2.56E+01 |  |
| 7932860 | ---          | ---       | ---                                            | -0.058 | 0.960 | 6.87E-01 | 6.87E+01 |  |
| 7932862 | ---          | ---       | ---                                            | 0.026  | 1.018 | 8.88E-01 | 8.88E+01 |  |
| 7932867 | NM_00114377  | ZNF438    | zinc finger protein 438                        | 0.352  | 1.276 | 2.34E-01 | 2.34E+01 |  |
| 7932881 | AK094743     | LOC390414 | hypothetical LOC390414                         | -0.004 | 0.997 | 9.85E-01 | 9.85E+01 |  |
| 7932883 | ---          | ---       | ---                                            | -0.075 | 0.949 | 6.57E-01 | 6.57E+01 |  |
| 7932885 | NM_018287    | ARHGAP12  | Rho GTPase activating protein 12               | 0.012  | 1.009 | 9.64E-01 | 9.64E+01 |  |

|         |              |           |                                      |        |       |          |          |  |  |
|---------|--------------|-----------|--------------------------------------|--------|-------|----------|----------|--|--|
| 7932911 | NM_004521    | KIF5B     | kinesin family member 5B             | 0.033  | 1.023 | 7.90E-01 | 7.90E+01 |  |  |
| 7932938 | NM_025209    | EPC1      | enhancer of polycomb homolog 1       | -0.034 | 0.977 | 8.31E-01 | 8.31E+01 |  |  |
| 7932964 | NM_006333    | C1D       | C1D nuclear receptor co-repressor    | 0.071  | 1.050 | 7.32E-01 | 7.32E+01 |  |  |
| 7932966 | NM_033666    | ITGB1     | integrin, beta 1 (fibronectin recept | -0.093 | 0.938 | 5.91E-01 | 5.91E+01 |  |  |
| 7932983 | ---          | ---       | ---                                  | 0.005  | 1.003 | 9.85E-01 | 9.85E+01 |  |  |
| 7932985 | NM_003873    | NRP1      | neuropilin 1                         | 0.083  | 1.059 | 9.14E-01 | 9.14E+01 |  |  |
| 7933008 | ---          | ---       | ---                                  | 0.209  | 1.156 | 5.25E-01 | 5.25E+01 |  |  |
| 7933010 | NM_019619    | PARD3     | par-3 partitioning defective 3 hom   | -0.086 | 0.942 | 6.73E-01 | 6.73E+01 |  |  |
| 7933047 | NM_003591    | CUL2      | cullin 2                             | 0.074  | 1.053 | 6.83E-01 | 6.83E+01 |  |  |
| 7933071 | ---          | ---       | ---                                  | 0.064  | 1.045 | 8.25E-01 | 8.25E+01 |  |  |
| 7933073 | NM_153368    | GJD4      | gap junction protein, delta 4, 40.1  | 0.010  | 1.007 | 9.63E-01 | 9.63E+01 |  |  |
| 7933075 | NM_031866    | FZD8      | frizzled homolog 8 (Drosophila)      | -0.036 | 0.975 | 7.57E-01 | 7.57E+01 |  |  |
| 7933080 | ---          | ---       | ---                                  | 0.083  | 1.059 | 7.28E-01 | 7.28E+01 |  |  |
| 7933113 | ---          | ---       | ---                                  | 0.067  | 1.048 | 8.06E-01 | 8.06E+01 |  |  |
| 7933115 | NR_027269    | CDC10L    | CDC10 cell division cycle 10 homol   | -0.027 | 0.981 | 7.94E-01 | 7.94E+01 |  |  |
| 7933129 | NR_026777    | ZNF37B    | zinc finger protein 37B (pseudoge    | -0.026 | 0.982 | 9.16E-01 | 9.16E+01 |  |  |
| 7933145 | ---          | ---       | ---                                  | 0.062  | 1.044 | 8.43E-01 | 8.43E+01 |  |  |
| 7933149 | NM_145313    | RASGEF1A  | RasGEF domain family, member 1       | -0.064 | 0.957 | 4.44E-01 | 4.44E+01 |  |  |
| 7933164 | NM_004966    | HNRNPF    | heterogeneous nuclear ribonucleo     | 0.020  | 1.014 | 8.92E-01 | 8.92E+01 |  |  |
| 7933178 | ---          | ---       | ---                                  | -0.063 | 0.957 | 7.36E-01 | 7.36E+01 |  |  |
| 7933180 | NM_00109928  | ZNF239    | zinc finger protein 239              | -0.048 | 0.967 | 8.00E-01 | 8.00E+01 |  |  |
| 7933186 | NM_006973    | ZNF32     | zinc finger protein 32               | 0.015  | 1.011 | 9.63E-01 | 9.63E+01 |  |  |
| 7933192 | NR_002726    | HNRNPA3P1 | heterogeneous nuclear ribonucleo     | 0.002  | 1.001 | 9.90E-01 | 9.90E+01 |  |  |
| 7933204 | NM_007021    | C10orf10  | chromosome 10 open reading fram      | -0.010 | 0.993 | 9.72E-01 | 9.72E+01 |  |  |
| 7933209 | NM_006963    | ZNF22     | zinc finger protein 22 (KOX 15)      | -0.014 | 0.990 | 9.53E-01 | 9.53E+01 |  |  |
| 7933228 | NM_00100226  | 40245     | membrane-associated ring finger      | 0.045  | 1.032 | 7.75E-01 | 7.75E+01 |  |  |
| 7933237 | NM_174890    | ANUBL1    | AN1, ubiquitin-like, homolog (Xen    | 0.128  | 1.093 | 2.89E-01 | 2.89E+01 |  |  |
| 7933252 | NM_133446    | AGAP4     | ArfGAP with GTPase domain, anky      | 0.065  | 1.046 | 6.39E-01 | 6.39E+01 |  |  |
| 7933290 | NR_003611    | BMS1P5    | BMS1 pseudogene 5                    | 0.048  | 1.034 | 8.31E-01 | 8.31E+01 |  |  |
| 7933298 | NM_031912    | SYT15     | synaptotagmin XV                     | 0.026  | 1.018 | 8.66E-01 | 8.66E+01 |  |  |
| 7933310 | ---          | ---       | ---                                  | 0.011  | 1.008 | 9.56E-01 | 9.56E+01 |  |  |
| 7933312 | NM_00109884  | ANXA8L1   | annexin A8-like 1                    | -0.084 | 0.944 | 2.52E-01 | 2.52E+01 |  |  |
| 7933327 | NM_00113755  | FAM25B    | family with sequence similarity 25   | -0.033 | 0.977 | 8.18E-01 | 8.18E+01 |  |  |
| 7933331 | NM_00114400  | AGAP5     | ArfGAP with GTPase domain, anky      | 0.044  | 1.031 | 8.01E-01 | 8.01E+01 |  |  |
| 7933359 | NM_002900    | RBP3      | retinol binding protein 3, intersti  | 0.085  | 1.061 | 2.78E-01 | 2.78E+01 |  |  |
| 7933366 | NM_016204    | GDF2      | growth differentiation factor 2      | -0.045 | 0.969 | 7.10E-01 | 7.10E+01 |  |  |
| 7933372 | NM_004962    | GDF10     | growth differentiation factor 10     | -0.020 | 0.986 | 8.63E-01 | 8.63E+01 |  |  |
| 7933405 | NM_133446    | AGAP4     | ArfGAP with GTPase domain, anky      | 0.058  | 1.041 | 6.66E-01 | 6.66E+01 |  |  |
| 7933413 | NR_003611    | BMS1P5    | BMS1 pseudogene 5                    | 0.034  | 1.024 | 8.93E-01 | 8.93E+01 |  |  |
| 7933423 | NM_00113755  | FAM25B    | family with sequence similarity 25   | -0.033 | 0.977 | 8.18E-01 | 8.18E+01 |  |  |
| 7933427 | NM_00114400  | AGAP5     | ArfGAP with GTPase domain, anky      | 0.053  | 1.037 | 6.54E-01 | 6.54E+01 |  |  |
| 7933469 | NM_021226    | ARHGAP22  | Rho GTPase activating protein 22     | 0.114  | 1.082 | 3.45E-01 | 3.45E+01 |  |  |
| 7933484 | NM_00100693  | LRRC18    | leucine rich repeat containing 18    | 0.124  | 1.090 | 4.92E-01 | 4.92E+01 |  |  |
| 7933498 | ENST00000311 | FAM170B   | family with sequence similarity 17   | 0.005  | 1.003 | 9.77E-01 | 9.77E+01 |  |  |
| 7933501 | NM_00108052  | DRGX      | dorsal root ganglia homeobox         | 0.003  | 1.002 | 9.88E-01 | 9.88E+01 |  |  |
| 7933509 | NM_000124    | ERCC6     | excision repair cross-complement     | -0.080 | 0.946 | 5.48E-01 | 5.48E+01 |  |  |
| 7933537 | NM_018245    | OGDHL     | oxoglutarate dehydrogenase-like      | -0.070 | 0.953 | 5.55E-01 | 5.55E+01 |  |  |
| 7933561 | NM_003631    | PARG      | poly (ADP-ribose) glycohydrolase     | 0.062  | 1.044 | 8.00E-01 | 8.00E+01 |  |  |
| 7933574 | NM_00107768  | AGAP7     | ArfGAP with GTPase domain, anky      | 0.063  | 1.045 | 6.15E-01 | 6.15E+01 |  |  |
| 7933582 | NM_006327    | TIMM23    | translocase of inner mitochondrial   | 0.023  | 1.016 | 9.09E-01 | 9.09E+01 |  |  |
| 7933593 | ---          | ---       | ---                                  | -0.066 | 0.955 | 7.81E-01 | 7.81E+01 |  |  |
| 7933619 | NM_147156    | SGMS1     | sphingomyelin synthase 1             | -0.029 | 0.980 | 9.09E-01 | 9.09E+01 |  |  |
| 7933632 | ---          | ---       | ---                                  | 0.034  | 1.024 | 8.96E-01 | 8.96E+01 |  |  |
| 7933634 | ---          | ---       | ---                                  | 0.101  | 1.072 | 7.59E-01 | 7.59E+01 |  |  |
| 7933659 | NM_015235    | CSTF2T    | cleavage stimulation factor, 3' pre  | 0.084  | 1.060 | 5.26E-01 | 5.26E+01 |  |  |
| 7933707 | NM_032997    | ZWINT     | ZW10 interactor                      | 0.028  | 1.020 | 8.33E-01 | 8.33E+01 |  |  |
| 7933723 | NM_152230    | IPMK      | inositol polyphosphate multikinase   | 0.128  | 1.093 | 5.78E-01 | 5.78E+01 |  |  |
| 7933760 | NM_005436    | CCDC6     | coiled-coil domain containing 6      | 0.072  | 1.051 | 5.71E-01 | 5.71E+01 |  |  |
| 7933772 | NM_020987    | ANK3      | ankyrin 3, node of Ranvier (ankyrin  | -0.206 | 0.867 | 5.16E-01 | 5.16E+01 |  |  |
| 7933877 | NM_004241    | JMJD1C    | jumonji domain containing 1C         | -0.134 | 0.911 | 1.74E-01 | 1.74E+01 |  |  |
| 7933931 | ---          | ---       | ---                                  | -0.037 | 0.975 | 8.34E-01 | 8.34E+01 |  |  |
| 7933945 | ---          | ---       | ---                                  | 0.005  | 1.004 | 9.81E-01 | 9.81E+01 |  |  |
| 7933947 | NM_022079    | HERC4     | hect domain and RLD 4                | -0.015 | 0.990 | 9.34E-01 | 9.34E+01 |  |  |
| 7933976 | ---          | ---       | ---                                  | -0.135 | 0.911 | 2.35E-01 | 2.35E+01 |  |  |
| 7933999 | NM_017987    | RUFY2     | RUN and FYVE domain containing       | -0.065 | 0.956 | 6.48E-01 | 6.48E+01 |  |  |
| 7934074 | NM_001057    | TACR2     | tachykinin receptor 2                | -0.060 | 0.959 | 5.68E-01 | 5.68E+01 |  |  |
| 7934083 | NM_020999    | NEUROG3   | neurogenin 3                         | -0.071 | 0.952 | 4.39E-01 | 4.39E+01 |  |  |
| 7934101 | NM_032797    | AIFM2     | apoptosis-inducing factor, mitochr   | -0.035 | 0.976 | 8.95E-01 | 8.95E+01 |  |  |
| 7934114 | NM_173555    | TYSND1    | trypsin domain containing 1          | -0.073 | 0.950 | 4.66E-01 | 4.66E+01 |  |  |
| 7934122 | NM_00114264  | SAR1A     | SAR1 homolog A (S. cerevisiae)       | 0.011  | 1.008 | 9.55E-01 | 9.55E+01 |  |  |
| 7934133 | NM_021129    | PPA1      | pyrophosphatase (inorganic) 1        | -0.107 | 0.929 | 7.07E-01 | 7.07E+01 |  |  |
| 7934141 | NM_022146    | NPFFR1    | neuropeptide FF receptor 1           | 0.021  | 1.015 | 9.01E-01 | 9.01E+01 |  |  |
| 7934145 | NM_207119    | LRRC20    | leucine rich repeat containing 20    | -0.010 | 0.993 | 9.60E-01 | 9.60E+01 |  |  |
| 7934154 | ---          | ---       | ---                                  | -0.061 | 0.959 | 8.01E-01 | 8.01E+01 |  |  |
| 7934161 | NM_005041    | PRF1      | perforin 1 (pore forming protein)    | 0.141  | 1.103 | 6.69E-01 | 6.69E+01 |  |  |
| 7934178 | NM_000281    | PCBD1     | pterin-4 alpha-carbinolamine dehy    | 0.132  | 1.096 | 5.10E-01 | 5.10E+01 |  |  |
| 7934185 | NM_022153    | C10orf54  | chromosome 10 open reading fram      | 0.106  | 1.076 | 1.94E-01 | 1.94E+01 |  |  |

|         |             |          |                                      |        |       |          |          |  |
|---------|-------------|----------|--------------------------------------|--------|-------|----------|----------|--|
| 7934215 | NM_014767   | SPOCK2   | sparc/osteonectin, cwcv and kazal    | -0.173 | 0.887 | 3.21E-02 | 3.21E+00 |  |
| 7934244 | NM_00100276 | DNAJB12  | Dnaj (Hsp40) homolog, subfamily      | -0.070 | 0.953 | 5.30E-01 | 5.30E+01 |  |
| 7934255 | NM_006077   | CBARA1   | calcium binding atopy-related aut    | 0.247  | 1.186 | 6.76E-02 | 6.76E+00 |  |
| 7934269 | ---         | ---      | ---                                  | -0.150 | 0.901 | 1.13E-01 | 1.13E+01 |  |
| 7934271 | NM_032562   | PLA2G12B | phospholipase A2, group XIIB         | -0.009 | 0.994 | 9.61E-01 | 9.61E+01 |  |
| 7934278 | NM_000917   | P4HA1    | prolyl 4-hydroxylase, alpha polype   | -0.068 | 0.954 | 8.41E-01 | 8.41E+01 |  |
| 7934297 | ---         | ---      | ---                                  | -0.187 | 0.879 | 3.70E-01 | 3.70E+01 |  |
| 7934299 | NM_015901   | NUDT13   | nudix (nucleoside diphosphate lin    | 0.014  | 1.010 | 9.68E-01 | 9.68E+01 |  |
| 7934301 | NM_007265   | ECD      | ecdysoneless homolog (Drosophila)    | -0.070 | 0.953 | 6.01E-01 | 6.01E+01 |  |
| 7934320 | NM_015190   | DNAJC9   | Dnaj (Hsp40) homolog, subfamily      | -0.153 | 0.899 | 2.66E-01 | 2.66E+01 |  |
| 7934326 | NM_016065   | MRPS16   | mitochondrial ribosomal protein S    | 0.059  | 1.042 | 6.66E-01 | 6.66E+01 |  |
| 7934367 | NM_004034   | ANXA7    | annexin A7                           | -0.111 | 0.926 | 2.03E-01 | 2.03E+01 |  |
| 7934384 | NM_00102459 | ZMYND17  | zinc finger, MYND-type containing    | -0.073 | 0.951 | 5.98E-01 | 5.98E+01 |  |
| 7934393 | NM_00114235 | PPP3CB   | protein phosphatase 3 (formerly 2    | 0.021  | 1.015 | 9.01E-01 | 9.01E+01 |  |
| 7934411 | NM_152586   | USP54    | ubiquitin specific peptidase 54      | -0.007 | 0.995 | 9.78E-01 | 9.78E+01 |  |
| 7934451 | NM_00114400 | AGAP5    | ArfGAP with GTPase domain, anky      | 0.054  | 1.038 | 6.50E-01 | 6.50E+01 |  |
| 7934459 | NM_003635   | NDST2    | N-acetylase/N-sulfotransferase       | -0.055 | 0.962 | 6.33E-01 | 6.33E+01 |  |
| 7934477 | NM_172171   | CAMK2G   | calcium/calmodulin-dependent pr      | -0.054 | 0.963 | 6.44E-01 | 6.44E+01 |  |
| 7934513 | NM_207012   | AP3M1    | adaptor-related protein complex 3    | 0.085  | 1.061 | 2.74E-01 | 2.74E+01 |  |
| 7934527 | NM_00100389 | DUPD1    | dual specificity phosphatase and p   | -0.041 | 0.972 | 8.10E-01 | 8.10E+01 |  |
| 7934533 | NM_00100727 | DUSP13   | dual specificity phosphatase 13      | -0.067 | 0.955 | 3.66E-01 | 3.66E+01 |  |
| 7934544 | NM_144589   | COMTD1   | catechol-O-methyltransferase dom     | -0.072 | 0.952 | 2.57E-01 | 2.57E+01 |  |
| 7934553 | NM_032772   | ZNF503   | zinc finger protein 503              | 0.015  | 1.010 | 9.26E-01 | 9.26E+01 |  |
| 7934566 | ---         | ---      | ---                                  | 0.088  | 1.063 | 5.09E-01 | 5.09E+01 |  |
| 7934615 | NM_004747   | DLG5     | discs, large homolog 5 (Drosophila)  | -0.090 | 0.940 | 3.75E-01 | 3.75E+01 |  |
| 7934651 | ---         | ---      | ---                                  | 0.179  | 1.132 | 1.03E-01 | 1.03E+01 |  |
| 7934653 | NM_007055   | POLR3A   | polymerase (RNA) III (DNA directe    | 0.027  | 1.019 | 8.75E-01 | 8.75E+01 |  |
| 7934690 | NM_153367   | ZCCHC24  | zinc finger, CCHC domain containi    | -0.052 | 0.965 | 6.01E-01 | 6.01E+01 |  |
| 7934698 | NM_00109866 | SFTPA2   | surfactant protein A2                | -0.118 | 0.921 | 6.89E-02 | 6.89E+00 |  |
| 7934706 | ---         | ---      | ---                                  | 0.025  | 1.017 | 9.51E-01 | 9.51E+01 |  |
| 7934708 | NM_00109866 | SFTPA2   | surfactant protein A2                | -0.118 | 0.921 | 6.89E-02 | 6.89E+00 |  |
| 7934717 | 0           | 0        | 0                                    | 0.025  | 1.017 | 9.51E-01 | 9.51E+01 |  |
| 7934719 | NM_003019   | SFTPD    | surfactant protein D                 | -0.087 | 0.941 | 3.63E-01 | 3.63E+01 |  |
| 7934731 | NM_006333   | C1D      | C1D nuclear receptor co-repressor    | 0.145  | 1.106 | 3.35E-01 | 3.35E+01 |  |
| 7934733 | NM_145869   | ANXA11   | annexin A11                          | 0.120  | 1.086 | 1.42E-01 | 1.42E+01 |  |
| 7934753 | NM_00109969 | EIF5A1   | eukaryotic translation initiation fa | -0.081 | 0.945 | 6.76E-01 | 6.76E+01 |  |
| 7934783 | NM_015613   | LRIT1    | leucine-rich repeat, immunoglobul    | -0.074 | 0.950 | 5.15E-01 | 5.15E+01 |  |
| 7934789 | NM_017551   | GRID1    | glutamate receptor, ionotropic, de   | 0.006  | 1.004 | 9.73E-01 | 9.73E+01 |  |
| 7934810 | ---         | ---      | ---                                  | 0.062  | 1.044 | 5.34E-01 | 5.34E+01 |  |
| 7934812 | NM_015045   | WAPAL    | wings apart-like homolog (Drosophi   | -0.018 | 0.988 | 8.79E-01 | 8.79E+01 |  |
| 7934842 | NM_024756   | MMRN2    | multimerin 2                         | -0.001 | 0.999 | 9.95E-01 | 9.95E+01 |  |
| 7934850 | ---         | ---      | ---                                  | 0.010  | 1.007 | 9.66E-01 | 9.66E+01 |  |
| 7934852 | NM_005271   | GLUD1    | glutamate dehydrogenase 1            | 0.184  | 1.136 | 1.51E-02 | 1.51E+00 |  |
| 7934870 | NM_032810   | ATAD1    | ATPase family, AAA domain contain    | 0.021  | 1.015 | 9.19E-01 | 9.19E+01 |  |
| 7934885 | NM_018363   | RNLS     | renalase, FAD-dependent amine o      | 0.117  | 1.084 | 1.27E-01 | 1.27E+01 |  |
| 7934896 | ---         | ---      | ---                                  | 0.094  | 1.067 | 7.56E-01 | 7.56E+01 |  |
| 7934906 | NM_00114194 | ACTA2    | actin, alpha 2, smooth muscle, aor   | 0.116  | 1.084 | 3.69E-01 | 3.69E+01 |  |
| 7934916 | NM_003956   | CH25H    | cholesterol 25-hydroxylase           | 0.066  | 1.047 | 7.11E-01 | 7.11E+01 |  |
| 7934945 | NM_148977   | PANK1    | pantothenate kinase 1                | -0.016 | 0.989 | 9.05E-01 | 9.05E+01 |  |
| 7934959 | ---         | ---      | ---                                  | 0.050  | 1.035 | 8.05E-01 | 8.05E+01 |  |
| 7934966 | ---         | ---      | ---                                  | 0.004  | 1.003 | 9.81E-01 | 9.81E+01 |  |
| 7935002 | NM_003133   | SRP9     | signal recognition particle 9kDa     | 0.069  | 1.049 | 5.26E-01 | 5.26E+01 |  |
| 7935006 | NM_152429   | FGFBP3   | fibroblast growth factor binding pr  | -0.044 | 0.970 | 7.94E-01 | 7.94E+01 |  |
| 7935011 | NM_014912   | CPEB3    | cytoplasmic polyadenylation elem     | 0.185  | 1.137 | 7.00E-02 | 7.00E+00 |  |
| 7935027 | NM_004969   | IDE      | insulin-degrading enzyme             | 0.077  | 1.055 | 5.71E-01 | 5.71E+01 |  |
| 7935054 | ---         | ---      | ---                                  | 0.154  | 1.113 | 2.93E-01 | 2.93E+01 |  |
| 7935123 | NM_145246   | C10orf4  | chromosome 10 open reading fram      | -0.053 | 0.964 | 7.16E-01 | 7.16E+01 |  |
| 7935139 | NR_002319   | PIPSL    | PIP5K1A and PSMC4-like               | -0.086 | 0.942 | 5.11E-01 | 5.11E+01 |  |
| 7935146 | NM_022451   | NOC3L    | nucleolar complex associated 3 ho    | 0.052  | 1.037 | 8.39E-01 | 8.39E+01 |  |
| 7935180 | NM_020992   | PDLIM1   | PDZ and LIM domain 1                 | 0.281  | 1.215 | 6.41E-02 | 6.41E+00 |  |
| 7935230 | NM_002860   | ALDH18A1 | aldehyde dehydrogenase 18 famil      | 0.049  | 1.035 | 8.27E-01 | 8.27E+01 |  |
| 7935251 | NM_015631   | TCTN3    | tectonic family member 3             | 0.001  | 1.001 | 9.97E-01 | 9.97E+01 |  |
| 7935296 | NM_012465   | TLL2     | tollid-like 2                        | -0.011 | 0.992 | 9.57E-01 | 9.57E+01 |  |
| 7935320 | NM_020123   | TM9SF3   | transmembrane 9 superfamily me       | 0.021  | 1.015 | 8.71E-01 | 8.71E+01 |  |
| 7935337 | NM_152309   | PIK3AP1  | phosphoinositide-3-kinase adapto     | 0.144  | 1.105 | 7.16E-01 | 7.16E+01 |  |
| 7935359 | ---         | ---      | ---                                  | 0.061  | 1.043 | 8.36E-01 | 8.36E+01 |  |
| 7935361 | NM_003061   | SLIT1    | slit homolog 1 (Drosophila)          | -0.008 | 0.994 | 9.65E-01 | 9.65E+01 |  |
| 7935403 | NM_032900   | ARHGAP19 | Rho GTPase activating protein 19     | -0.010 | 0.993 | 9.74E-01 | 9.74E+01 |  |
| 7935421 | NM_012083   | FRAT2    | frequently rearranged in advanced    | 0.100  | 1.071 | 2.41E-01 | 2.41E+01 |  |
| 7935425 | NM_015179   | RRP12    | ribosomal RNA processing 12 hom      | -0.064 | 0.957 | 5.49E-01 | 5.49E+01 |  |
| 7935462 | NM_016046   | EXOSC1   | exosome component 1                  | -0.049 | 0.967 | 8.17E-01 | 8.17E+01 |  |
| 7935474 | NM_022362   | MMS19    | MMS19 nucleotide excision repair     | -0.045 | 0.969 | 6.89E-01 | 6.89E+01 |  |
| 7935521 | NM_021732   | AVP1     | arginine vasopressin-induced 1       | 0.109  | 1.079 | 2.35E-01 | 2.35E+01 |  |
| 7935528 | NM_003015   | SFRP5    | secreted frizzled-related protein 5  | -0.003 | 0.998 | 9.86E-01 | 9.86E+01 |  |
| 7935553 | NM_032211   | LOXL4    | lysyl oxidase-like 4                 | 0.015  | 1.011 | 8.81E-01 | 8.81E+01 |  |
| 7935572 | NM_032709   | PYROXD2  | pyridine nucleotide-disulphide oxi   | -0.062 | 0.958 | 6.54E-01 | 6.54E+01 |  |
| 7935588 | NM_000195   | HPS1     | Hermansky-Pudlak syndrome 1          | 0.025  | 1.017 | 8.52E-01 | 8.52E+01 |  |

|         |             |           |                                                           |        |       |          |          |  |  |
|---------|-------------|-----------|-----------------------------------------------------------|--------|-------|----------|----------|--|--|
| 7935627 | NM_002079   | GOT1      | glutamic-oxaloacetic transaminase                         | 0.009  | 1.006 | 9.81E-01 | 9.81E+01 |  |  |
| 7935639 | NM_031212   | SLC25A28  | solute carrier family 25, member 2                        | -0.015 | 0.990 | 9.44E-01 | 9.44E+01 |  |  |
| 7935647 | NM_078470   | COX15     | COX15 homolog, cytochrome c oxidase                       | 0.014  | 1.010 | 9.56E-01 | 9.56E+01 |  |  |
| 7935660 | NM_015221   | DNMBP     | dynamitin binding protein                                 | 0.087  | 1.062 | 3.75E-01 | 3.75E+01 |  |  |
| 7935692 | NM_00110062 | ERLIN1    | ER lipid raft associated 1                                | 0.049  | 1.034 | 8.46E-01 | 8.46E+01 |  |  |
| 7935707 | NM_001278   | CHUK      | conserved helix-loop-helix ubiquitin                      | 0.142  | 1.103 | 3.04E-01 | 3.04E+01 |  |  |
| 7935730 | NM_018294   | CWF19L1   | CWF19-like 1, cell cycle control (S. cerevisiae)          | 0.014  | 1.010 | 9.54E-01 | 9.54E+01 |  |  |
| 7935746 | NM_00100134 | BLOC1S2   | biogenesis of lysosomal organelles 2                      | 0.145  | 1.106 | 2.08E-01 | 2.08E+01 |  |  |
| 7935776 | NM_005063   | SCD       | stearoyl-CoA desaturase (delta-9-desaturase)              | 0.318  | 1.246 | 2.10E-01 | 2.10E+01 |  |  |
| 7935780 | NM_015490   | SEC31B    | SEC31 homolog B (S. cerevisiae)                           | -0.005 | 0.996 | 9.85E-01 | 9.85E+01 |  |  |
| 7935810 | NM_005004   | NDUFB8    | NADH dehydrogenase (ubiquinone) complex I                 | -0.004 | 0.997 | 9.85E-01 | 9.85E+01 |  |  |
| 7935819 | NM_032112   | MRPL43    | mitochondrial ribosomal protein L43                       | -0.015 | 0.990 | 9.24E-01 | 9.24E+01 |  |  |
| 7935834 | NM_024895   | PDZD7     | PDZ domain containing 7                                   | -0.036 | 0.976 | 7.62E-01 | 7.62E+01 |  |  |
| 7935855 | NM_006562   | LBX1      | ladybird homeobox 1                                       | -0.100 | 0.933 | 2.09E-01 | 2.09E+01 |  |  |
| 7935861 | ---         | ---       | ---                                                       | 0.126  | 1.091 | 6.56E-01 | 6.56E+01 |  |  |
| 7935863 | ---         | ---       | ---                                                       | 0.090  | 1.064 | 6.87E-01 | 6.87E+01 |  |  |
| 7935865 | NM_013274   | POLL      | polymerase (DNA directed), lambda                         | 0.041  | 1.029 | 7.40E-01 | 7.40E+01 |  |  |
| 7935882 | NM_022039   | FBXW4     | F-box and WD repeat domain containing 4                   | -0.104 | 0.931 | 2.68E-01 | 2.68E+01 |  |  |
| 7935892 | NM_033163   | FGF8      | fibroblast growth factor 8 (androgen-inducible)           | -0.051 | 0.965 | 7.52E-01 | 7.52E+01 |  |  |
| 7935903 | NM_006993   | NPM3      | nucleophosmin/nucleoplasm 3                               | -0.052 | 0.965 | 7.72E-01 | 7.72E+01 |  |  |
| 7935910 | NM_012215   | MGEA5     | meningioma expressed antigen 5                            | 0.009  | 1.007 | 9.58E-01 | 9.58E+01 |  |  |
| 7935930 | NM_014591   | KCNIP2    | Kv channel interacting protein 2                          | 0.076  | 1.054 | 6.56E-01 | 6.56E+01 |  |  |
| 7935951 | NM_024541   | C10orf76  | chromosome 10 open reading frame 76                       | 0.090  | 1.065 | 3.84E-01 | 3.84E+01 |  |  |
| 7935968 | NM_003893   | LDB1      | LIM domain binding 1                                      | -0.104 | 0.930 | 3.48E-01 | 3.48E+01 |  |  |
| 7935983 | NM_005029   | PITX3     | paired-like homeodomain 3                                 | 0.004  | 1.002 | 9.86E-01 | 9.86E+01 |  |  |
| 7935990 | NM_002779   | PSD       | pleckstrin and Sec7 domain containing 1                   | -0.084 | 0.943 | 3.58E-01 | 3.58E+01 |  |  |
| 7936011 | NM_024040   | CUEDC2    | CUE domain containing 2                                   | -0.043 | 0.971 | 7.87E-01 | 7.87E+01 |  |  |
| 7936023 | BC126459    | C10orf95  | chromosome 10 open reading frame 95                       | -0.024 | 0.983 | 8.81E-01 | 8.81E+01 |  |  |
| 7936028 | NM_005736   | ACTR1A    | ARP1 actin-related protein 1 homolog                      | 0.017  | 1.012 | 9.54E-01 | 9.54E+01 |  |  |
| 7936041 | NM_004311   | ARL3      | ADP-ribosylation factor-like 3                            | -0.112 | 0.925 | 3.69E-01 | 3.69E+01 |  |  |
| 7936062 | ---         | ---       | ---                                                       | 0.053  | 1.037 | 7.30E-01 | 7.30E+01 |  |  |
| 7936064 | NM_012229   | NT5C2     | 5'-nucleotidase, cytosolic II                             | 0.248  | 1.188 | 1.07E-01 | 1.07E+01 |  |  |
| 7936083 | NM_00101166 | PCGF6     | polycomb group ring finger 6                              | -0.071 | 0.952 | 7.15E-01 | 7.15E+01 |  |  |
| 7936091 | NM_032747   | USMG5     | up-regulated during skeletal muscle development 5         | -0.071 | 0.952 | 5.62E-01 | 5.62E+01 |  |  |
| 7936096 | NM_014976   | PDCD11    | programmed cell death 11                                  | -0.028 | 0.981 | 8.50E-01 | 8.50E+01 |  |  |
| 7936100 | NM_015916   | CALHM2    | calcium homeostasis modulator 2                           | 0.070  | 1.049 | 4.99E-01 | 4.99E+01 |  |  |
| 7936108 | NM_00100141 | CALHM1    | calcium homeostasis modulator 1                           | -0.069 | 0.954 | 4.05E-01 | 4.05E+01 |  |  |
| 7936115 | NM_014631   | SH3PXD2A  | SH3 and PX domains 2A                                     | -0.064 | 0.957 | 5.33E-01 | 5.33E+01 |  |  |
| 7936134 | NM_024928   | OBFC1     | oligonucleotide/oligosaccharide-binding 1                 | 0.052  | 1.037 | 8.30E-01 | 8.30E+01 |  |  |
| 7936144 | NM_000494   | COL17A1   | collagen, type XVII, alpha 1                              | -0.034 | 0.977 | 7.41E-01 | 7.41E+01 |  |  |
| 7936242 | NM_033397   | ITPRIP    | inositol 1,4,5-trisphosphate receptor interacting protein | -0.044 | 0.970 | 6.81E-01 | 6.81E+01 |  |  |
| 7936284 | NM_020383   | XPNPEP1   | X-prolyl aminopeptidase (aminopeptidase)                  | 0.108  | 1.078 | 4.85E-01 | 4.85E+01 |  |  |
| 7936307 | NM_005871   | SMNDC1    | survival motor neuron domain containing 1                 | 0.015  | 1.011 | 9.33E-01 | 9.33E+01 |  |  |
| 7936320 | NR_026715   | RPL13AP6  | ribosomal protein L13a pseudogene 6                       | 0.014  | 1.010 | 9.56E-01 | 9.56E+01 |  |  |
| 7936322 | NM_020918   | GPAM      | glycerol-3-phosphate acyltransferase                      | 0.057  | 1.040 | 7.62E-01 | 7.62E+01 |  |  |
| 7936346 | NM_022494   | ZDHHC6    | zinc finger, DHHC-type containing 6                       | 0.035  | 1.024 | 7.70E-01 | 7.70E+01 |  |  |
| 7936406 | ---         | ---       | ---                                                       | 0.130  | 1.094 | 5.49E-01 | 5.49E+01 |  |  |
| 7936419 | NM_018017   | C10orf118 | chromosome 10 open reading frame 118                      | -0.051 | 0.965 | 7.10E-01 | 7.10E+01 |  |  |
| 7936463 | NM_002313   | ABLIM1    | actin binding LIM protein 1                               | -0.195 | 0.873 | 1.52E-01 | 1.52E+01 |  |  |
| 7936494 | NM_005264   | GFRA1     | GDNF family receptor alpha 1                              | -0.037 | 0.975 | 7.81E-01 | 7.81E+01 |  |  |
| 7936507 | BC021737    | C10orf82  | chromosome 10 open reading frame 82                       | 0.090  | 1.064 | 2.24E-01 | 2.24E+01 |  |  |
| 7936552 | NM_199131   | VAX1      | ventral anterior homeobox 1                               | -0.054 | 0.963 | 5.99E-01 | 5.99E+01 |  |  |
| 7936559 | NM_173791   | PDZD8     | PDZ domain containing 8                                   | -0.031 | 0.979 | 8.18E-01 | 8.18E+01 |  |  |
| 7936567 | NM_014904   | RAB11FIP2 | RAB11 family interacting protein 2                        | 0.089  | 1.064 | 4.20E-01 | 4.20E+01 |  |  |
| 7936578 | NM_022063   | C10orf84  | chromosome 10 open reading frame 84                       | 0.010  | 1.007 | 9.63E-01 | 9.63E+01 |  |  |
| 7936596 | NM_153810   | C10orf46  | chromosome 10 open reading frame 46                       | 0.095  | 1.068 | 3.04E-01 | 3.04E+01 |  |  |
| 7936614 | NM_003750   | EIF3A     | eukaryotic translation initiation factor 3 subunit A      | 0.053  | 1.037 | 4.15E-01 | 4.15E+01 |  |  |
| 7936637 | NR_002917   | SNORA19   | small nucleolar RNA, H/ACA box 19                         | 0.265  | 1.202 | 6.16E-02 | 6.16E+00 |  |  |
| 7936639 | ---         | ---       | ---                                                       | 0.222  | 1.166 | 2.46E-01 | 2.46E+01 |  |  |
| 7936641 | NM_213649   | SFXN4     | sideroflexin 4                                            | 0.089  | 1.064 | 7.70E-01 | 7.70E+01 |  |  |
| 7936661 | NM_006793   | PRDX3     | peroxiredoxin 3                                           | 0.018  | 1.013 | 9.50E-01 | 9.50E+01 |  |  |
| 7936673 | NM_00100533 | RGS10     | regulator of G-protein signaling 10                       | -0.032 | 0.978 | 8.64E-01 | 8.64E+01 |  |  |
| 7936683 | NM_00103392 | TIAL1     | TIA1 cytotoxic granule-associated protein 1               | 0.028  | 1.020 | 8.16E-01 | 8.16E+01 |  |  |
| 7936706 | NM_024834   | C10orf119 | chromosome 10 open reading frame 119                      | 0.081  | 1.058 | 3.56E-01 | 3.56E+01 |  |  |
| 7936727 | NM_000982   | RPL21     | ribosomal protein L21                                     | -0.015 | 0.990 | 9.37E-01 | 9.37E+01 |  |  |
| 7936762 | NM_00100197 | ATE1      | arginyltransferase 1                                      | 0.040  | 1.028 | 8.39E-01 | 8.39E+01 |  |  |
| 7936777 | NM_017615   | NSMCE4A   | non-SMC element 4 homolog A (S. cerevisiae)               | -0.007 | 0.995 | 9.74E-01 | 9.74E+01 |  |  |
| 7936809 | NM_152644   | FAM24B    | family with sequence similarity 24                        | 0.095  | 1.068 | 7.23E-01 | 7.23E+01 |  |  |
| 7936826 | NM_022466   | IKZF5     | IKAROS family zinc finger 5 (Pegasus)                     | 0.033  | 1.023 | 8.97E-01 | 8.97E+01 |  |  |
| 7936833 | ---         | ---       | ---                                                       | 0.059  | 1.042 | 7.63E-01 | 7.63E+01 |  |  |
| 7936856 | NM_015892   | CHST15    | carbohydrate (N-acetyl)galactosaminyltransferase 15       | -0.037 | 0.974 | 9.16E-01 | 9.16E+01 |  |  |
| 7936871 | NM_000274   | OAT       | ornithine aminotransferase (gyrate)                       | -0.102 | 0.932 | 6.58E-01 | 6.58E+01 |  |  |
| 7936882 | NM_00114634 | NKX1-2    | NK1 homeobox 2                                            | -0.016 | 0.989 | 9.16E-01 | 9.16E+01 |  |  |
| 7936884 | NM_014661   | FAM53B    | family with sequence similarity 53                        | -0.080 | 0.946 | 6.58E-01 | 6.58E+01 |  |  |
| 7936891 | NM_212554   | METTL10   | methyltransferase like 10                                 | 0.037  | 1.026 | 8.19E-01 | 8.19E+01 |  |  |
| 7936902 | ---         | ---       | ---                                                       | 0.164  | 1.121 | 7.39E-01 | 7.39E+01 |  |  |
| 7936904 | NM_022802   | CTBP2     | C-terminal binding protein 2                              | -0.071 | 0.952 | 4.84E-01 | 4.84E+01 |  |  |

|         |              |              |                                                             |        |       |          |          |  |  |
|---------|--------------|--------------|-------------------------------------------------------------|--------|-------|----------|----------|--|--|
| 7936923 | M21191       | ALDOAP2      | aldolase A, fructose-bisphosphate                           | 0.023  | 1.016 | 8.79E-01 | 8.79E+01 |  |  |
| 7936928 | NM_147191    | MMP21        | matrix metalloproteinase 21                                 | -0.108 | 0.928 | 3.04E-01 | 3.04E+01 |  |  |
| 7936937 | NM_000375    | UROS         | uroporphyrinogen III synthase                               | 0.060  | 1.043 | 7.68E-01 | 7.68E+01 |  |  |
| 7936949 | NM_018180    | DHX32        | DEAH (Asp-Glu-Ala-His) box polypeptide                      | 0.155  | 1.114 | 4.24E-01 | 4.24E+01 |  |  |
| 7937014 | AK127642     | LOC387720    | hypothetical LOC387720                                      | -0.098 | 0.934 | 3.42E-01 | 3.42E+01 |  |  |
| 7937020 | NM_002417    | MKI67        | antigen identified by monoclonal antibody                   | 0.315  | 1.244 | 1.45E-01 | 1.45E+01 |  |  |
| 7937039 | NM_00100546  | EBF3         | early B-cell factor 3                                       | -0.018 | 0.988 | 9.02E-01 | 9.02E+01 |  |  |
| 7937059 | NM_174937    | TCERG1L      | transcription elongation regulator 1                        | -0.004 | 0.997 | 9.78E-01 | 9.78E+01 |  |  |
| 7937073 | ENST00000341 | FLJ46300     | FLJ46300 protein                                            | -0.008 | 0.995 | 9.63E-01 | 9.63E+01 |  |  |
| 7937079 | NM_004052    | BNIP3        | BCL2/adenovirus E1B 19kDa interacting protein               | -0.035 | 0.976 | 9.19E-01 | 9.19E+01 |  |  |
| 7937089 | NM_173575    | STK32C       | serine/threonine kinase 32C                                 | -0.018 | 0.987 | 9.01E-01 | 9.01E+01 |  |  |
| 7937104 | AK097584     | LOC100128830 | hypothetical protein LOC100128830                           | 0.001  | 1.000 | 9.99E-01 | 9.99E+01 |  |  |
| 7937106 | NM_177400    | NKX6-2       | NK6 homeobox 2                                              | 0.018  | 1.013 | 9.04E-01 | 9.04E+01 |  |  |
| 7937112 | NM_017609    | C10orf92     | chromosome 10 open reading frame 92                         | -0.115 | 0.923 | 4.87E-02 | 4.87E+00 |  |  |
| 7937150 | NM_001109    | ADAM8        | ADAM metalloproteinase domain 8                             | -0.076 | 0.949 | 3.00E-01 | 3.00E+01 |  |  |
| 7937175 | NM_006659    | TUBGCP2      | tubulin, gamma complex associated protein 2                 | -0.056 | 0.962 | 7.15E-01 | 7.15E+01 |  |  |
| 7937198 | ---          | ---          | ---                                                         | -0.056 | 0.962 | 6.16E-01 | 6.16E+01 |  |  |
| 7937200 | NM_015722    | CALY         | calcyon neuron-specific vesicular trafficking protein       | -0.079 | 0.946 | 4.69E-01 | 4.69E+01 |  |  |
| 7937208 | NM_198472    | C10orf125    | chromosome 10 open reading frame 125                        | 0.017  | 1.012 | 9.14E-01 | 9.14E+01 |  |  |
| 7937217 | NM_004092    | ECHS1        | enoyl Coenzyme A hydratase, short chain, class 1            | 0.074  | 1.053 | 5.29E-01 | 5.29E+01 |  |  |
| 7937228 | NM_00101250  | SPRN         | shadow of prion protein homolog                             | -0.050 | 0.966 | 6.98E-01 | 6.98E+01 |  |  |
| 7937247 | NM_130784    | SYCE1        | synaptonemal complex central element                        | -0.049 | 0.967 | 6.99E-01 | 6.99E+01 |  |  |
| 7937257 | NM_145651    | SCGB1C1      | secretoglobins, family 1C, member 1                         | 0.002  | 1.002 | 9.88E-01 | 9.88E+01 |  |  |
| 7937275 | NM_021932    | RIC8A        | resistance to inhibitors of cholinesterase                  | 0.008  | 1.005 | 9.74E-01 | 9.74E+01 |  |  |
| 7937287 | NM_002817    | PSMD13       | proteasome (prosome, macropain) subunit type 13             | -0.041 | 0.972 | 8.09E-01 | 8.09E+01 |  |  |
| 7937305 | NM_138329    | NLRP6        | NLR family, pyrin domain containing 6                       | 0.037  | 1.026 | 7.85E-01 | 7.85E+01 |  |  |
| 7937314 | NM_025092    | ATH1L        | ATH1, acid trehalase-like 1 (yeast)                         | -0.108 | 0.928 | 5.61E-01 | 5.61E+01 |  |  |
| 7937330 | NM_006435    | IFITM2       | interferon induced transmembrane protein 2                  | 0.236  | 1.178 | 1.56E-02 | 1.56E+00 |  |  |
| 7937335 | NM_003641    | IFITM1       | interferon induced transmembrane protein 1                  | 0.036  | 1.026 | 9.16E-01 | 9.16E+01 |  |  |
| 7937341 | NM_178537    | B4GALNT4     | beta-1,4-N-acetyl-galactosaminyl transferase 4              | 0.031  | 1.022 | 8.45E-01 | 8.45E+01 |  |  |
| 7937363 | NM_007183    | PKP3         | plakophilin 3                                               | -0.008 | 0.994 | 9.62E-01 | 9.62E+01 |  |  |
| 7937378 | NM_030783    | PTDS2        | phosphatidylserine synthase 2                               | -0.050 | 0.966 | 5.72E-01 | 5.72E+01 |  |  |
| 7937391 | NM_198075    | LRRC56       | leucine rich repeat containing 56                           | 0.033  | 1.023 | 8.34E-01 | 8.34E+01 |  |  |
| 7937404 | BC039077     | C11orf35     | chromosome 11 open reading frame 35                         | -0.088 | 0.941 | 5.39E-01 | 5.39E+01 |  |  |
| 7937407 | NM_003475    | RASSF7       | Ras association (RalGDS/AF-6) domain containing 7           | -0.021 | 0.986 | 8.79E-01 | 8.79E+01 |  |  |
| 7937415 | NM_020901    | PHRF1        | PHD and ring finger domains 1                               | -0.062 | 0.958 | 5.74E-01 | 5.74E+01 |  |  |
| 7937433 | NM_000797    | DRD4         | dopamine receptor D4                                        | 0.008  | 1.006 | 9.65E-01 | 9.65E+01 |  |  |
| 7937438 | NM_174940    | TMEM80       | transmembrane protein 80                                    | -0.086 | 0.942 | 3.85E-01 | 3.85E+01 |  |  |
| 7937443 | NM_022772    | EPS8L2       | EP8-like 2                                                  | -0.002 | 0.999 | 9.90E-01 | 9.90E+01 |  |  |
| 7937465 | NM_006755    | TALDO1       | transaldolase 1                                             | -0.055 | 0.962 | 8.69E-01 | 8.69E+01 |  |  |
| 7937474 | AF435951     | NS3BP        | NS3BP                                                       | -0.079 | 0.947 | 6.07E-01 | 6.07E+01 |  |  |
| 7937476 | NM_001004    | RPLP2        | ribosomal protein, large, P2                                | 0.019  | 1.013 | 9.53E-01 | 9.53E+01 |  |  |
| 7937483 | NR_002585    | SNORA52      | small nucleolar RNA, H/ACA box 52                           | -0.069 | 0.953 | 6.06E-01 | 6.06E+01 |  |  |
| 7937485 | NM_020376    | PNPLA2       | patatin-like phospholipase domain containing 2              | 0.027  | 1.019 | 8.15E-01 | 8.15E+01 |  |  |
| 7937498 | NM_173584    | EFCAB4A      | EF-hand calcium binding domain 4                            | -0.020 | 0.986 | 8.87E-01 | 8.87E+01 |  |  |
| 7937508 | NM_004357    | CD151        | CD151 molecule (Raph blood group)                           | 0.053  | 1.037 | 7.76E-01 | 7.76E+01 |  |  |
| 7937518 | NM_00102523  | TSPAN4       | tetraspanin 4                                               | -0.073 | 0.951 | 3.91E-01 | 3.91E+01 |  |  |
| 7937533 | NM_012305    | AP2A2        | adaptor-related protein complex 2                           | 0.102  | 1.073 | 3.09E-01 | 3.09E+01 |  |  |
| 7937560 | NM_002457    | MUC2         | mucin 2, oligomeric mucus/gel-forming                       | -0.026 | 0.982 | 7.56E-01 | 7.56E+01 |  |  |
| 7937612 | NM_002458    | MUC5B        | mucin 5B, oligomeric mucus/gel-forming                      | -0.036 | 0.975 | 7.55E-01 | 7.55E+01 |  |  |
| 7937667 | NM_003957    | BRSK2        | BR serine/threonine kinase 2                                | -0.037 | 0.974 | 7.44E-01 | 7.44E+01 |  |  |
| 7937696 | NM_00100432  | KRTAP5-2     | keratin associated protein 5-2                              | -0.072 | 0.952 | 7.51E-01 | 7.51E+01 |  |  |
| 7937698 | NM_00100592  | KRTAP5-1     | keratin associated protein 5-1                              | -0.035 | 0.976 | 7.82E-01 | 7.82E+01 |  |  |
| 7937700 | NM_00100148  | KRTAP5-5     | keratin associated protein 5-5                              | -0.050 | 0.966 | 7.51E-01 | 7.51E+01 |  |  |
| 7937707 | NR_026643    | FAM99A       | family with sequence similarity 99                          | -0.166 | 0.891 | 3.97E-01 | 3.97E+01 |  |  |
| 7937709 | NM_00101241  | KRTAP5-6     | keratin associated protein 5-6                              | -0.075 | 0.949 | 5.57E-01 | 5.57E+01 |  |  |
| 7937713 | NM_138567    | SYT8         | synaptotagmin VIII                                          | -0.018 | 0.987 | 8.63E-01 | 8.63E+01 |  |  |
| 7937728 | NM_00114582  | TNNI2        | troponin I type 2 (skeletal, fast)                          | -0.043 | 0.971 | 6.39E-01 | 6.39E+01 |  |  |
| 7937735 | NM_002339    | LSP1         | lymphocyte-specific protein 1                               | 0.017  | 1.012 | 9.10E-01 | 9.10E+01 |  |  |
| 7937749 | NM_006757    | TNNT3        | troponin T type 3 (skeletal, fast)                          | -0.078 | 0.948 | 3.86E-01 | 3.86E+01 |  |  |
| 7937763 | NM_021134    | MRPL23       | mitochondrial ribosomal protein L23                         | 0.009  | 1.006 | 9.56E-01 | 9.56E+01 |  |  |
| 7937774 | NM_016412    | IGF2AS       | insulin-like growth factor 2 antisense 1                    | 0.022  | 1.016 | 8.73E-01 | 8.73E+01 |  |  |
| 7937782 | NM_139022    | TSPAN32      | tetraspanin 32                                              | 0.023  | 1.016 | 8.33E-01 | 8.33E+01 |  |  |
| 7937798 | ---          | ---          | ---                                                         | 0.079  | 1.056 | 6.93E-01 | 6.93E+01 |  |  |
| 7937813 | NM_005706    | TSSC4        | tumor suppressing subtransferase 4                          | 0.023  | 1.016 | 8.80E-01 | 8.80E+01 |  |  |
| 7937823 | NM_000218    | KCNQ1        | potassium voltage-gated channel, non-inactivating, KQT-type | 0.039  | 1.027 | 7.68E-01 | 7.68E+01 |  |  |
| 7937847 | NR_024627    | KCNQ1DN      | KCNQ1 downstream neighbor                                   | 0.018  | 1.013 | 9.09E-01 | 9.09E+01 |  |  |
| 7937852 | NM_002555    | SLC22A18     | solute carrier family 22, member 18                         | -0.058 | 0.961 | 5.71E-01 | 5.71E+01 |  |  |
| 7937866 | ---          | ---          | ---                                                         | -0.004 | 0.998 | 9.91E-01 | 9.91E+01 |  |  |
| 7937876 | ---          | ---          | ---                                                         | 0.001  | 1.001 | 9.97E-01 | 9.97E+01 |  |  |
| 7937882 | NM_004314    | ART1         | ADP-ribosyltransferase 1                                    | 0.037  | 1.026 | 7.97E-01 | 7.97E+01 |  |  |
| 7937892 | NR_027015    | PGAP2        | post-GPI attachment to proteins 2                           | -0.043 | 0.971 | 7.62E-01 | 7.62E+01 |  |  |
| 7937900 | NM_003156    | STIM1        | stromal interaction molecule 1                              | 0.016  | 1.011 | 9.50E-01 | 9.50E+01 |  |  |
| 7937913 | ---          | ---          | ---                                                         | 0.065  | 1.046 | 8.13E-01 | 8.13E+01 |  |  |
| 7937915 | NM_001033    | RRM1         | ribonucleotide reductase M1                                 | 0.106  | 1.076 | 5.26E-01 | 5.26E+01 |  |  |
| 7937936 | ---          | ---          | ---                                                         | 0.039  | 1.027 | 8.64E-01 | 8.64E+01 |  |  |
| 7937944 | NM_00100413  | OR52M1       | olfactory receptor, family 52, subfamily 1                  | -0.019 | 0.987 | 9.27E-01 | 9.27E+01 |  |  |

|         |              |              |                                      |        |       |          |          |  |  |
|---------|--------------|--------------|--------------------------------------|--------|-------|----------|----------|--|--|
| 7938010 | NM_00100516  | OR52B6       | olfactory receptor, family 52, subf  | 0.133  | 1.097 | 6.58E-01 | 6.58E+01 |  |  |
| 7938035 | NM_006074    | TRIM22       | tripartite motif-containing 22       | 0.056  | 1.040 | 7.97E-01 | 7.97E+01 |  |  |
| 7938047 | ---          | ---          | ---                                  | -0.063 | 0.957 | 7.17E-01 | 7.17E+01 |  |  |
| 7938066 | NM_00100344  | OR56A3       | olfactory receptor, family 56, subf  | 0.033  | 1.023 | 8.33E-01 | 8.33E+01 |  |  |
| 7938076 | NM_00100517  | OR52W1       | olfactory receptor, family 52, subf  | -0.019 | 0.987 | 9.30E-01 | 9.30E+01 |  |  |
| 7938090 | NM_176875    | CCKBR        | cholecystokinin B receptor           | 0.006  | 1.004 | 9.77E-01 | 9.77E+01 |  |  |
| 7938100 | NM_000543    | SMPD1        | sphingomyelin phosphodiesterase      | 0.065  | 1.046 | 7.16E-01 | 7.16E+01 |  |  |
| 7938111 | NM_012192    | FXC1         | fracture callus 1 homolog (rat)      | -0.097 | 0.935 | 3.27E-01 | 3.27E+01 |  |  |
| 7938118 | NM_173589    | DNHD1        | dynein heavy chain domain 1          | 0.060  | 1.043 | 6.60E-01 | 6.60E+01 |  |  |
| 7938128 | NM_144666    | DNHD1        | dynein heavy chain domain 1          | 0.019  | 1.013 | 9.55E-01 | 9.55E+01 |  |  |
| 7938133 | NM_144666    | DNHD1        | dynein heavy chain domain 1          | -0.110 | 0.927 | 3.77E-01 | 3.77E+01 |  |  |
| 7938139 | NM_144666    | DNHD1        | dynein heavy chain domain 1          | -0.008 | 0.994 | 9.65E-01 | 9.65E+01 |  |  |
| 7938154 | NM_004517    | ILK          | integrin-linked kinase               | -0.040 | 0.973 | 8.28E-01 | 8.28E+01 |  |  |
| 7938170 | NM_00100448  | OR2AG1       | olfactory receptor, family 2, subfa  | -0.029 | 0.980 | 8.29E-01 | 8.29E+01 |  |  |
| 7938179 | NM_207186    | OR10A4       | olfactory receptor, family 10, subf  | 0.143  | 1.104 | 2.03E-01 | 2.03E+01 |  |  |
| 7938208 | NM_014469    | RBMLX2       | RNA binding motif protein, X-link    | 0.042  | 1.030 | 7.04E-01 | 7.04E+01 |  |  |
| 7938231 | NM_003621    | PPFIBP2      | PTPRF interacting protein, binding   | 0.039  | 1.027 | 8.58E-01 | 8.58E+01 |  |  |
| 7938263 | NM_003754    | EIF3F        | eukaryotic translation initiation fa | -0.065 | 0.956 | 7.03E-01 | 7.03E+01 |  |  |
| 7938269 | NM_003320    | TUB          | tubby homolog (mouse)                | 0.032  | 1.022 | 7.65E-01 | 7.65E+01 |  |  |
| 7938286 | NM_000990    | RPL27A       | ribosomal protein L27a               | 0.038  | 1.027 | 8.22E-01 | 8.22E+01 |  |  |
| 7938291 | NR_002580    | SNORA3       | small nucleolar RNA, H/ACA box 3     | -0.016 | 0.989 | 9.74E-01 | 9.74E+01 |  |  |
| 7938293 | NR_002977    | SNORA45      | small nucleolar RNA, H/ACA box 4     | -0.082 | 0.945 | 7.55E-01 | 7.55E+01 |  |  |
| 7938295 | NM_000990    | RPL27A       | ribosomal protein L27a               | 0.014  | 1.010 | 9.52E-01 | 9.52E+01 |  |  |
| 7938301 | NM_020642    | C11orf17     | chromosome 11 open reading frar      | 0.058  | 1.041 | 8.63E-01 | 8.63E+01 |  |  |
| 7938309 | NR_027713    | FLJ46111     | keratin 8 pseudogene                 | -0.080 | 0.946 | 2.98E-01 | 2.98E+01 |  |  |
| 7938313 | NM_006391    | IPO7         | importin 7                           | 0.059  | 1.042 | 6.82E-01 | 6.82E+01 |  |  |
| 7938329 | NR_002962    | SNORA23      | small nucleolar RNA, H/ACA box 2     | 0.051  | 1.036 | 9.09E-01 | 9.09E+01 |  |  |
| 7938331 | NM_003442    | ZNF143       | zinc finger protein 143              | 0.036  | 1.025 | 8.63E-01 | 8.63E+01 |  |  |
| 7938348 | NM_003390    | WEE1         | WEE1 homolog (S. pombe)              | -0.013 | 0.991 | 9.64E-01 | 9.64E+01 |  |  |
| 7938364 | BX641032     | WEE1         | WEE1 homolog (S. pombe)              | 0.110  | 1.079 | 6.38E-01 | 6.38E+01 |  |  |
| 7938366 | BX641032     | WEE1         | WEE1 homolog (S. pombe)              | -0.024 | 0.984 | 9.77E-01 | 9.77E+01 |  |  |
| 7938368 | ---          | ---          | ---                                  | -0.049 | 0.967 | 8.25E-01 | 8.25E+01 |  |  |
| 7938370 | NM_015055    | SWAP70       | SWAP switching B-cell complex 70     | 0.093  | 1.067 | 6.56E-01 | 6.56E+01 |  |  |
| 7938388 | ---          | ---          | ---                                  | -0.035 | 0.976 | 8.99E-01 | 8.99E+01 |  |  |
| 7938390 | NM_001124    | ADM          | adrenomedullin                       | -0.104 | 0.931 | 8.33E-02 | 8.33E+00 |  |  |
| 7938416 | ENST00000324 | LOC100129827 | hypothetical protein LOC1001298      | -0.048 | 0.967 | 6.93E-01 | 6.93E+01 |  |  |
| 7938420 | ---          | ---          | ---                                  | -0.026 | 0.982 | 9.14E-01 | 9.14E+01 |  |  |
| 7938422 | NM_014633    | CTR9         | Ctr9, Paf1/RNA polymerase II com     | -0.017 | 0.988 | 9.27E-01 | 9.27E+01 |  |  |
| 7938448 | NM_017944    | USP47        | ubiquitin specific peptidase 47      | -0.075 | 0.949 | 5.16E-01 | 5.16E+01 |  |  |
| 7938519 | NM_032867    | MICALCL      | MICAL C-terminal like                | -0.101 | 0.932 | 3.04E-01 | 3.04E+01 |  |  |
| 7938528 | NM_018222    | PARVA        | parvin, alpha                        | -0.054 | 0.963 | 5.43E-01 | 5.43E+01 |  |  |
| 7938559 | NM_00108052  | RASSF10      | Ras association (RalGDS/AF-6) dor    | 0.003  | 1.002 | 9.87E-01 | 9.87E+01 |  |  |
| 7938563 | NM_001178    | ARNTL        | aryl hydrocarbon receptor nuclear    | 0.024  | 1.017 | 9.35E-01 | 9.35E+01 |  |  |
| 7938592 | NM_032228    | FAR1         | fatty acyl CoA reductase 1           | 0.274  | 1.209 | 4.28E-02 | 4.28E+00 |  |  |
| 7938608 | NM_006108    | SPON1        | spondin 1, extracellular matrix pro  | -0.143 | 0.906 | 5.86E-01 | 5.86E+01 |  |  |
| 7938625 | ---          | ---          | ---                                  | 0.042  | 1.030 | 8.31E-01 | 8.31E+01 |  |  |
| 7938629 | NM_000922    | PDE3B        | phosphodiesterase 3B, cGMP-inhi      | -0.228 | 0.854 | 7.05E-02 | 7.05E+00 |  |  |
| 7938669 | NM_014267    | C11orf58     | chromosome 11 open reading frar      | 0.013  | 1.009 | 9.32E-01 | 9.32E+01 |  |  |
| 7938681 | ---          | ---          | ---                                  | -0.025 | 0.982 | 9.02E-01 | 9.02E+01 |  |  |
| 7938683 | NR_002822    | MGC72080     | MGC72080 pseudogene                  | -0.046 | 0.969 | 8.16E-01 | 8.16E+01 |  |  |
| 7938685 | ---          | ---          | ---                                  | -0.103 | 0.931 | 1.42E-01 | 1.42E+01 |  |  |
| 7938687 | NM_005013    | NUCB2        | nucleobindin 2                       | 0.137  | 1.100 | 1.85E-01 | 1.85E+01 |  |  |
| 7938702 | NR_026750    | KFZp686O2416 | hypothetical protein DKFZp686O2      | 0.120  | 1.086 | 7.15E-01 | 7.15E+01 |  |  |
| 7938738 | NM_004976    | KCNK1        | potassium voltage-gated channel,     | -0.005 | 0.996 | 9.78E-01 | 9.78E+01 |  |  |
| 7938748 | ---          | ---          | ---                                  | -0.056 | 0.962 | 7.40E-01 | 7.40E+01 |  |  |
| 7938756 | AF512499     | FAM10A5      | family with sequence similarity 10   | -0.085 | 0.943 | 2.85E-01 | 2.85E+01 |  |  |
| 7938762 | NM_005316    | GTF2H1       | general transcription factor IIH, pc | 0.143  | 1.104 | 1.71E-01 | 1.71E+01 |  |  |
| 7938777 | NM_005566    | LDHA         | lactate dehydrogenase A              | -0.195 | 0.874 | 8.46E-02 | 8.46E+00 |  |  |
| 7938812 | NM_153347    | TMEM86A      | transmembrane protein 86A            | 0.132  | 1.096 | 1.58E-01 | 1.58E+01 |  |  |
| 7938880 | NM_00109852  | HTATIP2      | HIV-1 Tat interactive protein 2, 30  | -0.210 | 0.864 | 4.59E-02 | 4.59E+00 |  |  |
| 7938890 | NM_005788    | PRMT3        | protein arginine methyltransferase   | 0.022  | 1.015 | 9.37E-01 | 9.37E+01 |  |  |
| 7939005 | ---          | ---          | ---                                  | 0.008  | 1.005 | 9.78E-01 | 9.78E+01 |  |  |
| 7939068 | NM_001028    | RPS25        | ribosomal protein S25                | -0.045 | 0.969 | 7.35E-01 | 7.35E+01 |  |  |
| 7939072 | NM_152636    | METT5D1      | methyltransferase 5 domain conta     | 0.099  | 1.071 | 5.53E-01 | 5.53E+01 |  |  |
| 7939087 | BC047775     | C11orf46     | chromosome 11 open reading frar      | 0.124  | 1.090 | 4.06E-01 | 4.06E+01 |  |  |
| 7939120 | NM_002901    | RCN1         | reticulocalbin 1, EF-hand calcium t  | 0.123  | 1.089 | 6.20E-01 | 6.20E+01 |  |  |
| 7939137 | NM_006360    | EIF3M        | eukaryotic translation initiation fa | 0.034  | 1.024 | 8.78E-01 | 8.78E+01 |  |  |
| 7939150 | NM_024081    | PRRG4        | proline rich Gla (G-carboxyglutami   | 0.163  | 1.120 | 3.42E-01 | 3.42E+01 |  |  |
| 7939158 | NM_00107678  | QSER1        | glutamine and serine rich 1          | 0.206  | 1.153 | 3.68E-02 | 3.68E+00 |  |  |
| 7939184 | NM_018393    | TCP11L1      | t-complex 11 (mouse)-like 1          | -0.058 | 0.961 | 7.57E-01 | 7.57E+01 |  |  |
| 7939197 | NM_005734    | HIPK3        | homeodomain interacting protein      | 0.065  | 1.046 | 7.15E-01 | 7.15E+01 |  |  |
| 7939242 | NM_005898    | CAPRIN1      | cell cycle associated protein 1      | 0.022  | 1.016 | 8.66E-01 | 8.66E+01 |  |  |
| 7939265 | NM_024662    | NAT10        | N-acetyltransferase 10 (GCN5-rela    | 0.098  | 1.070 | 5.24E-01 | 5.24E+01 |  |  |
| 7939298 | NM_001752    | CAT          | catalase                             | 0.096  | 1.069 | 6.14E-01 | 6.14E+01 |  |  |
| 7939329 | NM_003477    | PDHX         | pyruvate dehydrogenase complex       | 0.038  | 1.027 | 8.76E-01 | 8.76E+01 |  |  |
| 7939341 | NM_000610    | CD44         | CD44 molecule (Indian blood grou     | 0.014  | 1.010 | 9.58E-01 | 9.58E+01 |  |  |
| 7939365 | NM_014344    | FXJ1         | four jointed box 1 (Drosophila)      | -0.073 | 0.951 | 5.63E-01 | 5.63E+01 |  |  |

|         |              |               |                                      |        |       |          |          |  |  |
|---------|--------------|---------------|--------------------------------------|--------|-------|----------|----------|--|--|
| 7939368 | NM_017583    | TRIM44        | tripartite motif-containing 44       | -0.003 | 0.998 | 9.87E-01 | 9.87E+01 |  |  |
| 7939376 | NM_174902    | LDLRAD3       | low density lipoprotein receptor c   | 0.104  | 1.075 | 1.66E-01 | 1.66E+01 |  |  |
| 7939383 | NM_024841    | PRR5L         | proline rich 5 like                  | -0.186 | 0.879 | 4.16E-01 | 4.16E+01 |  |  |
| 7939424 | NR_024625    | API5          | apoptosis inhibitor 5                | 0.010  | 1.007 | 9.61E-01 | 9.61E+01 |  |  |
| 7939432 | ---          | ---           | ---                                  | -0.091 | 0.939 | 7.17E-01 | 7.17E+01 |  |  |
| 7939434 | NM_018259    | TTC17         | tetratricopeptide repeat domain 1    | 0.046  | 1.032 | 6.88E-01 | 6.88E+01 |  |  |
| 7939465 | NM_016142    | HSD17B12      | hydroxysteroid (17-beta) dehydro     | 0.058  | 1.041 | 8.20E-01 | 8.20E+01 |  |  |
| 7939477 | NM_139178    | ALKBH3        | alkB, alkylation repair homolog 3 (  | 0.086  | 1.062 | 4.77E-01 | 4.77E+01 |  |  |
| 7939492 | NM_00114503  | LOC387763     | hypothetical protein LOC387763       | 0.022  | 1.015 | 9.00E-01 | 9.00E+01 |  |  |
| 7939507 | NM_032592    | ACCS          | 1-aminocyclopropane-1-carboxyla      | 0.033  | 1.023 | 8.07E-01 | 8.07E+01 |  |  |
| 7939524 | NM_000401    | EXT2          | exostoses (multiple) 2               | 0.039  | 1.027 | 7.90E-01 | 7.90E+01 |  |  |
| 7939546 | NM_002231    | CD82          | CD82 molecule                        | -0.196 | 0.873 | 2.99E-02 | 2.99E+00 |  |  |
| 7939559 | NM_130783    | TSPAN18       | tetraspanin 18                       | -0.075 | 0.949 | 5.34E-01 | 5.34E+01 |  |  |
| 7939569 | NM_020229    | PRDM11        | PR domain containing 11              | -0.005 | 0.997 | 9.80E-01 | 9.80E+01 |  |  |
| 7939587 | BX640618     | DKFZp779M0652 | hypothetical DKFZp779M0652           | -0.065 | 0.956 | 6.40E-01 | 6.40E+01 |  |  |
| 7939590 | NM_018389    | SLC35C1       | solute carrier family 35, member C   | 0.029  | 1.020 | 9.09E-01 | 9.09E+01 |  |  |
| 7939595 | NM_021117    | CRY2          | cryptochrome 2 (photolyase-like)     | 0.026  | 1.019 | 7.72E-01 | 7.72E+01 |  |  |
| 7939613 | NM_005456    | MAPK8IP1      | mitogen-activated protein kinase 4   | 0.073  | 1.052 | 5.41E-01 | 5.41E+01 |  |  |
| 7939620 | NM_152312    | GYLTL1B       | glycosyltransferase-like 1B          | -0.053 | 0.964 | 6.15E-01 | 6.15E+01 |  |  |
| 7939657 | NM_00110554  | DGKZ          | diacylglycerol kinase, zeta 104kDa   | -0.170 | 0.889 | 1.25E-01 | 1.25E+01 |  |  |
| 7939665 | NM_00101233  | MDK           | midkine (neurite growth-promotin     | -0.053 | 0.964 | 6.34E-01 | 6.34E+01 |  |  |
| 7939676 | NR_024587    | KIAA0652      | KIAA0652                             | -0.021 | 0.986 | 9.20E-01 | 9.20E+01 |  |  |
| 7939723 | NM_00100367  | C11orf49      | chromosome 11 open reading fram      | -0.049 | 0.967 | 7.83E-01 | 7.83E+01 |  |  |
| 7939738 | NM_000107    | DDB2          | damage-specific DNA binding prot     | -0.126 | 0.916 | 3.71E-01 | 3.71E+01 |  |  |
| 7939751 | NM_005693    | NR1H3         | nuclear receptor subfamily 1, grou   | 0.333  | 1.259 | 6.30E-02 | 6.30E+00 |  |  |
| 7939767 | NM_003682    | MADD          | MAP-kinase activating death dom      | -0.038 | 0.974 | 8.21E-01 | 8.21E+01 |  |  |
| 7939805 | NM_00112822  | SLC39A13      | solute carrier family 39 (zinc trans | 0.003  | 1.002 | 9.87E-01 | 9.87E+01 |  |  |
| 7939818 | NM_175732    | PTPMT1        | protein tyrosine phosphatase, mit    | 0.050  | 1.035 | 5.91E-01 | 5.91E+01 |  |  |
| 7939825 | NM_004551    | NDUFS3        | NADH dehydrogenase (ubiquinone       | -0.014 | 0.990 | 9.60E-01 | 9.60E+01 |  |  |
| 7939835 | ENST00000356 | FAM180B       | family with sequence similarity 18   | -0.068 | 0.954 | 5.35E-01 | 5.35E+01 |  |  |
| 7939839 | NM_002843    | PTPRJ         | protein tyrosine phosphatase, rec    | 0.136  | 1.099 | 4.94E-01 | 4.94E+01 |  |  |
| 7939902 | NR_024504    | LOC646813     | hypothetical LOC646813               | -0.016 | 0.989 | 9.60E-01 | 9.60E+01 |  |  |
| 7939996 | ---          | ---           | ---                                  | 0.039  | 1.028 | 7.51E-01 | 7.51E+01 |  |  |
| 7940002 | NM_00100521  | LRRC55        | leucine rich repeat containing 55    | -0.017 | 0.988 | 9.12E-01 | 9.12E+01 |  |  |
| 7940020 | ---          | ---           | ---                                  | -0.046 | 0.968 | 8.05E-01 | 8.05E+01 |  |  |
| 7940022 | NM_178570    | RTN4RL2       | reticulon 4 receptor-like 2          | -0.088 | 0.941 | 5.15E-01 | 5.15E+01 |  |  |
| 7940046 | NM_006831    | CLP1          | CLP1, cleavage and polyadenylati     | -0.043 | 0.971 | 7.69E-01 | 7.69E+01 |  |  |
| 7940051 | NM_015457    | ZDHHC5        | zinc finger, DHHC-type containing    | 0.050  | 1.035 | 6.91E-01 | 6.91E+01 |  |  |
| 7940066 | NM_015959    | TMX2          | thioredoxin-related transmembran     | 0.084  | 1.060 | 7.11E-01 | 7.11E+01 |  |  |
| 7940070 | NM_170746    | C11orf31      | chromosome 11 open reading fram      | 0.044  | 1.031 | 7.60E-01 | 7.60E+01 |  |  |
| 7940079 | NM_00108545  | CTNND1        | catenin (cadherin-associated prote   | 0.220  | 1.164 | 4.14E-01 | 4.14E+01 |  |  |
| 7940112 | NM_00100528  | OR9Q2         | olfactory receptor, family 9, subfa  | -0.085 | 0.943 | 5.10E-01 | 5.10E+01 |  |  |
| 7940118 | NR_024091    | ZFP91-CNTF    | ZFP91-CNTF readthrough transcrip     | 0.009  | 1.007 | 9.65E-01 | 9.65E+01 |  |  |
| 7940135 | NM_080661    | GLYATL1       | glycine-N-acyltransferase-like 1     | 0.202  | 1.150 | 2.01E-01 | 2.01E+01 |  |  |
| 7940153 | NM_022074    | FAM111A       | family with sequence similarity 11   | 0.141  | 1.103 | 1.97E-01 | 1.97E+01 |  |  |
| 7940160 | NM_015177    | DTX4          | deltex homolog 4 (Drosophila)        | 0.064  | 1.046 | 6.11E-01 | 6.11E+01 |  |  |
| 7940182 | NM_00100470  | OR4D10        | olfactory receptor, family 4, subfa  | -0.047 | 0.968 | 8.16E-01 | 8.16E+01 |  |  |
| 7940191 | NM_004177    | STX3          | syntaxin 3                           | -0.058 | 0.961 | 8.21E-01 | 8.21E+01 |  |  |
| 7940259 | NM_021201    | MS4A7         | membrane-spanning 4-domains, s       | 0.442  | 1.358 | 3.66E-01 | 3.66E+01 |  |  |
| 7940287 | NM_152866    | MS4A1         | membrane-spanning 4-domains, s       | 0.301  | 1.232 | 1.70E-01 | 1.70E+01 |  |  |
| 7940333 | NM_00109883  | MS4A15        | membrane-spanning 4-domains, s       | 0.013  | 1.009 | 9.53E-01 | 9.53E+01 |  |  |
| 7940349 | NM_024098    | CCDC86        | coiled-coil domain containing 86     | -0.092 | 0.938 | 4.44E-01 | 4.44E+01 |  |  |
| 7940358 | NM_207341    | ZP1           | zona pellucida glycoprotein 1 (spe   | 0.013  | 1.009 | 9.33E-01 | 9.33E+01 |  |  |
| 7940372 | NM_024092    | TMEM109       | transmembrane protein 109            | 0.091  | 1.065 | 3.88E-01 | 3.88E+01 |  |  |
| 7940377 | NM_017870    | TMEM132A      | transmembrane protein 132A           | -0.014 | 0.990 | 9.20E-01 | 9.20E+01 |  |  |
| 7940391 | NM_006725    | CD6           | CD6 molecule                         | -0.132 | 0.912 | 3.04E-01 | 3.04E+01 |  |  |
| 7940409 | NM_014207    | CD5           | CD5 molecule                         | -0.087 | 0.941 | 6.36E-01 | 6.36E+01 |  |  |
| 7940421 | NM_00107980  | PGA3          | pepsinogen 3, group I (pepsinogen    | 0.090  | 1.065 | 2.72E-01 | 2.72E+01 |  |  |
| 7940431 | NM_00107980  | PGA4          | pepsinogen 4, group I (pepsinogen    | 0.087  | 1.062 | 2.65E-01 | 2.65E+01 |  |  |
| 7940441 | NM_014224    | PGA5          | pepsinogen 5, group I (pepsinogen    | 0.064  | 1.045 | 3.97E-01 | 3.97E+01 |  |  |
| 7940451 | NM_015533    | DAK           | dihydroxyacetone kinase 2 homol      | -0.085 | 0.943 | 2.26E-01 | 2.26E+01 |  |  |
| 7940473 | NM_016464    | TMEM138       | transmembrane protein 138            | 0.169  | 1.124 | 5.61E-01 | 5.61E+01 |  |  |
| 7940486 | BC002331     | SDHAF2        | succinate dehydrogenase complex      | 0.035  | 1.025 | 8.86E-01 | 8.86E+01 |  |  |
| 7940491 | ---          | ---           | ---                                  | 0.074  | 1.053 | 6.20E-01 | 6.20E+01 |  |  |
| 7940493 | NM_145017    | C11orf66      | chromosome 11 open reading fram      | 0.005  | 1.004 | 9.77E-01 | 9.77E+01 |  |  |
| 7940530 | NM_00112739  | C11orf9       | chromosome 11 open reading fram      | -0.075 | 0.949 | 3.50E-01 | 3.50E+01 |  |  |
| 7940561 | NM_004111    | FEN1          | flap structure-specific endonuclea   | -0.041 | 0.972 | 8.21E-01 | 8.21E+01 |  |  |
| 7940565 | NM_004265    | FADS2         | fatty acid desaturase 2              | -0.103 | 0.931 | 3.27E-01 | 3.27E+01 |  |  |
| 7940580 | ---          | ---           | ---                                  | 0.055  | 1.039 | 7.70E-01 | 7.70E+01 |  |  |
| 7940582 | NM_004183    | BEST1         | bestrophin 1                         | -0.047 | 0.968 | 8.04E-01 | 8.04E+01 |  |  |
| 7940598 | AK093779     | LOC399900     | hypothetical LOC399900               | 0.008  | 1.005 | 9.77E-01 | 9.77E+01 |  |  |
| 7940600 | NM_00104069  | INCENP        | inner centromere protein antigens    | -0.046 | 0.969 | 6.95E-01 | 6.95E+01 |  |  |
| 7940626 | NM_002407    | SCGB2A1       | secretoglobin, family 2A, member     | 0.016  | 1.011 | 9.29E-01 | 9.29E+01 |  |  |
| 7940643 | NM_00108392  | ASRGL1        | asparaginase like 1                  | 0.228  | 1.171 | 8.54E-02 | 8.54E+00 |  |  |
| 7940654 | NM_003357    | SCGB1A1       | secretoglobin, family 1A, member     | -0.074 | 0.950 | 4.42E-01 | 4.42E+01 |  |  |
| 7940660 | ---          | ---           | ---                                  | 0.000  | 1.000 | 1.00E+00 | 1.00E+02 |  |  |
| 7940662 | NM_000327    | ROM1          | retinal outer segment membrane       | -0.029 | 0.980 | 8.78E-01 | 8.78E+01 |  |  |



|         |              |              |                                        |        |       |          |          |  |  |
|---------|--------------|--------------|----------------------------------------|--------|-------|----------|----------|--|--|
| 7940667 | NR_004390    | SNORA57      | small nucleolar RNA, H/ACA box 5       | -0.279 | 0.824 | 1.40E-01 | 1.40E+01 |  |  |
| 7940669 | NM_00108537  | C11orf83     | chromosome 11 open reading frame       | -0.117 | 0.922 | 2.80E-01 | 2.80E+01 |  |  |
| 7940673 | NM_012202    | GN3G         | guanine nucleotide binding protein     | 0.054  | 1.038 | 7.38E-01 | 7.38E+01 |  |  |
| 7940679 | NM_173810    | TTC9C        | tetratricopeptide repeat domain 9      | -0.002 | 0.999 | 9.94E-01 | 9.94E+01 |  |  |
| 7940688 | NM_002696    | POLR2G       | polymerase (RNA) II (DNA directed      | 0.031  | 1.021 | 8.60E-01 | 8.60E+01 |  |  |
| 7940698 | NM_006473    | TAF6L        | TAF6-like RNA polymerase II, p300      | 0.013  | 1.009 | 9.46E-01 | 9.46E+01 |  |  |
| 7940711 | NM_199337    | TMEM179B     | transmembrane protein 179B             | -0.016 | 0.989 | 9.37E-01 | 9.37E+01 |  |  |
| 7940717 | NM_00101266  | SLC3A2       | solute carrier family 3 (activators of | -0.229 | 0.853 | 1.16E-01 | 1.16E+01 |  |  |
| 7940749 | NM_080866    | SLC22A9      | solute carrier family 22 (organic an   | 0.020  | 1.014 | 9.03E-01 | 9.03E+01 |  |  |
| 7940762 | NM_00114253  | LGALS12      | lectin, galactoside-binding, soluble   | -0.001 | 0.999 | 9.94E-01 | 9.94E+01 |  |  |
| 7940775 | NM_004585    | RARRES3      | retinoic acid receptor responder 3     | 0.184  | 1.136 | 2.81E-01 | 2.81E+01 |  |  |
| 7940781 | NM_201428    | RTN3         | reticulon 3                            | 0.061  | 1.043 | 7.54E-01 | 7.54E+01 |  |  |
| 7940790 | BC056402     | C11orf84     | chromosome 11 open reading frame       | 0.023  | 1.016 | 9.00E-01 | 9.00E+01 |  |  |
| 7940798 | NM_017490    | MARK2        | MAP/microtubule affinity-regulating    | 0.010  | 1.007 | 9.60E-01 | 9.60E+01 |  |  |
| 7940822 | ---          | ---          | ---                                    | -0.013 | 0.991 | 9.83E-01 | 9.83E+01 |  |  |
| 7940824 | NM_024771    | NAT11        | N-acetyltransferase 11 (GCN5-rela      | -0.070 | 0.953 | 6.60E-01 | 6.60E+01 |  |  |
| 7940835 | NM_004074    | COX8A        | cytochrome c oxidase subunit 8A        | 0.115  | 1.083 | 4.45E-01 | 4.45E+01 |  |  |
| 7940840 | NM_017670    | OTUB1        | OTU domain, ubiquitin aldehyde b       | -0.074 | 0.950 | 6.54E-01 | 6.54E+01 |  |  |
| 7940851 | NM_013280    | FLRT1        | fibronectin leucine rich transmem      | 0.068  | 1.048 | 4.04E-01 | 4.04E+01 |  |  |
| 7940857 | NM_006819    | STIP1        | stress-induced-phosphoprotein 1        | -0.045 | 0.969 | 7.47E-01 | 7.47E+01 |  |  |
| 7940869 | NM_178443    | FERMT3       | fermitin family homolog 3 (Drosop      | 0.006  | 1.004 | 9.85E-01 | 9.85E+01 |  |  |
| 7940884 | NM_032344    | NUDT22       | nudix (nucleoside diphosphate link     | 0.044  | 1.031 | 7.08E-01 | 7.08E+01 |  |  |
| 7940891 | NM_005528    | DNAJC4       | DnaJ (Hsp40) homolog, subfamily        | 0.019  | 1.014 | 9.09E-01 | 9.09E+01 |  |  |
| 7940904 | NM_003377    | VEGFB        | vascular endothelial growth factor     | -0.099 | 0.934 | 2.91E-01 | 2.91E+01 |  |  |
| 7940914 | NM_004470    | FKBP2        | FK506 binding protein 2, 13kDa         | 0.017  | 1.012 | 9.26E-01 | 9.26E+01 |  |  |
| 7940924 | NM_000932    | PLCB3        | phospholipase C, beta 3 (phosphat      | -0.073 | 0.951 | 2.50E-01 | 2.50E+01 |  |  |
| 7940959 | NM_020155    | GPR137       | G protein-coupled receptor 137         | -0.087 | 0.942 | 2.76E-01 | 2.76E+01 |  |  |
| 7940971 | NM_033310    | KCNK4        | potassium channel, subfamily K, m      | -0.024 | 0.984 | 8.47E-01 | 8.47E+01 |  |  |
| 7940989 | NM_004451    | ESRR4        | estrogen-related receptor alpha        | -0.012 | 0.992 | 9.64E-01 | 9.64E+01 |  |  |
| 7940996 | NM_012094    | PRDX5        | peroxiredoxin 5                        | -0.001 | 1.000 | 9.98E-01 | 9.98E+01 |  |  |
| 7941004 | NM_032251    | CCDC88B      | coiled-coil domain containing 88B      | -0.041 | 0.972 | 6.85E-01 | 6.85E+01 |  |  |
| 7941039 | NM_003942    | RPS6KA4      | ribosomal protein S6 kinase, 90kD      | -0.008 | 0.995 | 9.58E-01 | 9.58E+01 |  |  |
| 7941059 | ENST00000316 | LOC439914    | hypothetical gene supported by N       | 0.038  | 1.027 | 8.47E-01 | 8.47E+01 |  |  |
| 7941062 | NM_018484    | SLC22A11     | solute carrier family 22 (organic an   | 0.018  | 1.012 | 8.88E-01 | 8.88E+01 |  |  |
| 7941074 | NM_144585    | SLC22A12     | solute carrier family 22 (organic an   | 0.028  | 1.019 | 8.33E-01 | 8.33E+01 |  |  |
| 7941087 | NM_006244    | PPP2R5B      | protein phosphatase 2, regulatory      | -0.033 | 0.978 | 8.06E-01 | 8.06E+01 |  |  |
| 7941104 | NM_001667    | ARL2         | ADP-ribosylation factor-like 2         | -0.070 | 0.953 | 5.31E-01 | 5.31E+01 |  |  |
| 7941111 | NM_013306    | SNX15        | sorting nexin 15                       | 0.040  | 1.028 | 7.82E-01 | 7.82E+01 |  |  |
| 7941122 | NM_013299    | SAC3D1       | SAC3 domain containing 1               | -0.015 | 0.990 | 9.09E-01 | 9.09E+01 |  |  |
| 7941127 | NM_006782    | ZFP11        | zinc finger protein-like 1             | -0.057 | 0.961 | 6.75E-01 | 6.75E+01 |  |  |
| 7941136 | NM_013265    | C11orf2      | chromosome 11 open reading frame       | -0.042 | 0.971 | 7.15E-01 | 7.15E+01 |  |  |
| 7941148 | NM_003273    | TM7SF2       | transmembrane 7 superfamily mem        | -0.015 | 0.990 | 9.17E-01 | 9.17E+01 |  |  |
| 7941164 | NM_004927    | MRPL49       | mitochondrial ribosomal protein L      | 0.002  | 1.002 | 9.92E-01 | 9.92E+01 |  |  |
| 7941172 | NM_00100877  | SPDYC        | speedy homolog C (Xenopus laevis       | -0.062 | 0.958 | 4.18E-01 | 4.18E+01 |  |  |
| 7941179 | NM_005186    | CAPN1        | calpain 1, (mu/l) large subunit        | 0.065  | 1.046 | 6.28E-01 | 6.28E+01 |  |  |
| 7941203 | NM_00100432  | SLC22A20     | solute carrier family 22, member 2     | -0.105 | 0.930 | 2.65E-01 | 2.65E+01 |  |  |
| 7941214 | NM_002689    | POLA2        | polymerase (DNA directed), alpha       | 0.052  | 1.037 | 7.79E-01 | 7.79E+01 |  |  |
| 7941236 | NM_006779    | CDC42EP2     | CDC42 effector protein (Rho GTPa       | -0.150 | 0.901 | 2.01E-02 | 2.01E+00 |  |  |
| 7941243 | NM_006268    | DPF2         | D4, zinc and double PHD fingers fa     | -0.079 | 0.947 | 5.52E-01 | 5.52E+01 |  |  |
| 7941255 | NM_145719    | TIGD3        | tigger transposable element deriv      | -0.025 | 0.983 | 8.61E-01 | 8.61E+01 |  |  |
| 7941260 | NM_031904    | FRMD8        | FERM domain containing 8               | 0.043  | 1.030 | 7.54E-01 | 7.54E+01 |  |  |
| 7941269 | ENST00000309 | LOC100291851 | similar to Putative ubiquitin-like p   | -0.004 | 0.997 | 9.85E-01 | 9.85E+01 |  |  |
| 7941272 | NR_002819    | MALAT1       | metastasis associated lung adenoc      | 0.015  | 1.010 | 8.77E-01 | 8.77E+01 |  |  |
| 7941274 | NM_020680    | SCYL1        | SCY1-like 1 (S. cerevisiae)            | -0.137 | 0.909 | 3.50E-02 | 3.50E+00 |  |  |
| 7941296 | NM_006396    | SSSCA1       | Sjogren syndrome/scleroderma au        | -0.035 | 0.976 | 8.53E-01 | 8.53E+01 |  |  |
| 7941302 | NM_00109878  | FAM89B       | family with sequence similarity 89     | -0.035 | 0.976 | 8.16E-01 | 8.16E+01 |  |  |
| 7941311 | NM_153253    | SIPA1        | signal-induced proliferation-associ    | 0.023  | 1.016 | 8.08E-01 | 8.08E+01 |  |  |
| 7941350 | NM_032223    | PCNXL3       | pecanex-like 3 (Drosophila)            | -0.040 | 0.973 | 6.54E-01 | 6.54E+01 |  |  |
| 7941364 | NM_032223    | PCNXL3       | pecanex-like 3 (Drosophila)            | -0.024 | 0.984 | 8.68E-01 | 8.68E+01 |  |  |
| 7941380 | ---          | ---          | ---                                    | 0.034  | 1.024 | 8.15E-01 | 8.15E+01 |  |  |
| 7941382 | NM_182710    | KAT5         | K(lysine) acetyltransferase 5          | -0.072 | 0.951 | 4.94E-01 | 4.94E+01 |  |  |
| 7941401 | NM_004561    | OVOL1        | ovo-like 1 (Drosophila)                | 0.000  | 1.000 | 9.99E-01 | 9.99E+01 |  |  |
| 7941425 | NM_025128    | MUS81        | MUS81 endonuclease homolog (S.         | -0.100 | 0.933 | 2.51E-01 | 2.51E+01 |  |  |
| 7941444 | NM_001335    | CTSW         | cathepsin W                            | -0.029 | 0.980 | 9.54E-01 | 9.54E+01 |  |  |
| 7941457 | NM_006848    | CCDC85B      | coiled-coil domain containing 85B      | -0.001 | 1.000 | 9.97E-01 | 9.97E+01 |  |  |
| 7941460 | NM_006442    | DRAP1        | DR1-associated protein 1 (negativ      | 0.029  | 1.021 | 8.88E-01 | 8.88E+01 |  |  |
| 7941469 | NM_152762    | TSGA10IP     | testis specific, 10 interacting prote  | -0.075 | 0.949 | 2.51E-01 | 2.51E+01 |  |  |
| 7941478 | NM_005146    | SART1        | squamous cell carcinoma antigen        | 0.000  | 1.000 | 1.00E+00 | 1.00E+02 |  |  |
| 7941501 | NM_003860    | BANF1        | barrier to autointegration factor 1    | -0.100 | 0.933 | 5.15E-01 | 5.15E+01 |  |  |
| 7941505 | NM_001323    | CST6         | cystatin E/M                           | -0.004 | 0.997 | 9.85E-01 | 9.85E+01 |  |  |
| 7941511 | NM_006842    | SF3B2        | splicing factor 3b, subunit 2, 145k    | -0.093 | 0.938 | 2.55E-01 | 2.55E+01 |  |  |
| 7941537 | NM_018026    | PACS1        | phosphofurin acidic cluster sorting    | -0.048 | 0.967 | 7.38E-01 | 7.38E+01 |  |  |
| 7941563 | ---          | ---          | ---                                    | -0.027 | 0.982 | 9.49E-01 | 9.49E+01 |  |  |
| 7941565 | NM_022822    | KLC2         | kinesin light chain 2                  | -0.075 | 0.950 | 3.90E-01 | 3.90E+01 |  |  |
| 7941583 | NM_030981    | RAB1B        | RAB1B, member RAS oncogene fam         | -0.007 | 0.995 | 9.82E-01 | 9.82E+01 |  |  |
| 7941587 | NM_182553    | CNIH2        | cornichon homolog 2 (Drosophila)       | -0.044 | 0.970 | 6.76E-01 | 6.76E+01 |  |  |
| 7941594 | NM_153266    | TMEM151A     | transmembrane protein 151A             | 0.007  | 1.005 | 9.73E-01 | 9.73E+01 |  |  |

|         |              |           |                                                                  |        |       |          |          |  |  |
|---------|--------------|-----------|------------------------------------------------------------------|--------|-------|----------|----------|--|--|
| 7941608 | ---          | ---       | ---                                                              | -0.060 | 0.959 | 6.91E-01 | 6.91E+01 |  |  |
| 7941610 | NM_145065    | PELI3     | pellino homolog 3 (Drosophila)                                   | 0.025  | 1.018 | 8.33E-01 | 8.33E+01 |  |  |
| 7941621 | NM_005700    | DPP3      | dipeptidyl-peptidase 3                                           | 0.005  | 1.003 | 9.85E-01 | 9.85E+01 |  |  |
| 7941639 | NM_024649    | BBS1      | Bardet-Biedl syndrome 1                                          | -0.022 | 0.985 | 9.13E-01 | 9.13E+01 |  |  |
| 7941662 | NM_001104    | ACTN3     | actinin, alpha 3                                                 | 0.067  | 1.047 | 6.82E-01 | 6.82E+01 |  |  |
| 7941685 | NM_005125    | CCS       | copper chaperone for superoxide                                  | -0.049 | 0.967 | 7.44E-01 | 7.44E+01 |  |  |
| 7941694 | NM_006328    | RBM14     | RNA binding motif protein 14                                     | 0.046  | 1.033 | 7.91E-01 | 7.91E+01 |  |  |
| 7941702 | NM_006328    | RBM14     | RNA binding motif protein 14                                     | -0.049 | 0.966 | 7.42E-01 | 7.42E+01 |  |  |
| 7941707 | NM_006328    | RBM14     | RNA binding motif protein 14                                     | -0.064 | 0.957 | 7.43E-01 | 7.43E+01 |  |  |
| 7941709 | NM_002896    | RBM4      | RNA binding motif protein 4                                      | -0.033 | 0.977 | 8.46E-01 | 8.46E+01 |  |  |
| 7941714 | NM_024650    | C11orf80  | chromosome 11 open reading frame                                 | 0.014  | 1.009 | 9.55E-01 | 9.55E+01 |  |  |
| 7941732 | NM_005133    | RCE1      | RCE1 homolog, prenyl protein peptidase                           | -0.083 | 0.944 | 3.78E-01 | 3.78E+01 |  |  |
| 7941743 | NM_024036    | LRFN4     | leucine rich repeat and fibronectin type III domain containing 4 | -0.072 | 0.951 | 5.25E-01 | 5.25E+01 |  |  |
| 7941746 | AK026328     | C11orf86  | chromosome 11 open reading frame                                 | -0.063 | 0.957 | 5.31E-01 | 5.31E+01 |  |  |
| 7941749 | NM_177963    | SYT12     | synaptotagmin XII                                                | 0.006  | 1.004 | 9.77E-01 | 9.77E+01 |  |  |
| 7941761 | NM_014578    | RHOD      | ras homolog gene family, member 1                                | -0.005 | 0.996 | 9.77E-01 | 9.77E+01 |  |  |
| 7941769 | NM_012308    | KDM2A     | lysine (K)-specific demethylase 2A                               | -0.013 | 0.991 | 9.40E-01 | 9.40E+01 |  |  |
| 7941795 | ---          | ---       | ---                                                              | 0.092  | 1.066 | 3.47E-01 | 3.47E+01 |  |  |
| 7941797 | NM_001619    | ADRBK1    | adrenergic, beta, receptor kinase 1                              | -0.049 | 0.967 | 7.06E-01 | 7.06E+01 |  |  |
| 7941822 | NM_207354    | ANKRD13D  | ankyrin repeat domain 13 family, member 1                        | -0.040 | 0.973 | 6.60E-01 | 6.60E+01 |  |  |
| 7941843 | NM_017857    | SSH3      | slingshot homolog 3 (Drosophila)                                 | -0.017 | 0.988 | 9.17E-01 | 9.17E+01 |  |  |
| 7941863 | ---          | ---       | ---                                                              | -0.076 | 0.949 | 6.75E-01 | 6.75E+01 |  |  |
| 7941865 | NM_004584    | RAD9A     | RAD9 homolog A (S. pombe)                                        | -0.039 | 0.974 | 6.17E-01 | 6.17E+01 |  |  |
| 7941879 | NM_198517    | TBC1D10C  | TBC1 domain family, member 10C                                   | -0.021 | 0.985 | 8.62E-01 | 8.62E+01 |  |  |
| 7941890 | NM_020811    | ATPGD1    | ATP-grasp domain containing 1                                    | -0.041 | 0.972 | 6.54E-01 | 6.54E+01 |  |  |
| 7941900 | NM_003952    | RPS6KB2   | ribosomal protein S6 kinase, 70kDa                               | -0.028 | 0.981 | 8.20E-01 | 8.20E+01 |  |  |
| 7941917 | NM_145200    | CABP4     | calcium binding protein 4                                        | -0.066 | 0.955 | 5.71E-01 | 5.71E+01 |  |  |
| 7941927 | NM_003977    | AIP       | aryl hydrocarbon receptor interacting protein                    | -0.011 | 0.992 | 9.64E-01 | 9.64E+01 |  |  |
| 7941936 | NM_000852    | GSTP1     | glutathione S-transferase pi 1                                   | -0.162 | 0.894 | 2.09E-01 | 2.09E+01 |  |  |
| 7941946 | NM_007103    | NDUFV1    | NADH dehydrogenase (ubiquinone) 1, 13S subunit                   | -0.033 | 0.978 | 8.75E-01 | 8.75E+01 |  |  |
| 7941961 | NM_000694    | ALDH3B1   | aldehyde dehydrogenase 3 family, member 1                        | -0.031 | 0.979 | 7.83E-01 | 7.83E+01 |  |  |
| 7941976 | NM_002496    | NDUFS8    | NADH dehydrogenase (ubiquinone) 1, 5S subunit                    | 0.021  | 1.015 | 8.95E-01 | 8.95E+01 |  |  |
| 7941985 | NM_006019    | TCIRG1    | T-cell, immune regulator 1, ATPase                               | 0.047  | 1.033 | 7.54E-01 | 7.54E+01 |  |  |
| 7942032 | NM_018312    | SAPS3     | SAPS domain family, member 3                                     | -0.012 | 0.992 | 9.23E-01 | 9.23E+01 |  |  |
| 7942064 | NM_015973    | GAL       | galanin prepropeptide                                            | 0.034  | 1.024 | 8.21E-01 | 8.21E+01 |  |  |
| 7942073 | NM_002180    | IGHMBP2   | immunoglobulin mu binding protein 2                              | -0.020 | 0.986 | 8.76E-01 | 8.76E+01 |  |  |
| 7942091 | NM_139075    | TPCN2     | two pore segment channel 2                                       | -0.003 | 0.998 | 9.86E-01 | 9.86E+01 |  |  |
| 7942118 | NM_138768    | MYEOV     | myeloma overexpressed (in a subset of multiple myeloma)          | -0.050 | 0.966 | 6.30E-01 | 6.30E+01 |  |  |
| 7942123 | NM_053056    | CCND1     | cyclin D1                                                        | -0.075 | 0.950 | 3.86E-01 | 3.86E+01 |  |  |
| 7942168 | NM_003824    | FADD      | Fas (TNFRSF6)-associated via death domain                        | -0.055 | 0.962 | 5.97E-01 | 5.97E+01 |  |  |
| 7942174 | NM_003626    | PPFIA1    | protein tyrosine phosphatase, receptor type, A1                  | 0.069  | 1.049 | 6.12E-01 | 6.12E+01 |  |  |
| 7942228 | BC004224     | C11orf76  | chromosome 11 open reading frame                                 | 0.042  | 1.029 | 7.19E-01 | 7.19E+01 |  |  |
| 7942232 | NM_018161    | NADSYN1   | NAD synthetase 1                                                 | 0.011  | 1.008 | 9.56E-01 | 9.56E+01 |  |  |
| 7942255 | NM_00101250  | KRTAP5-7  | keratin associated protein 5-7                                   | -0.004 | 0.997 | 9.86E-01 | 9.86E+01 |  |  |
| 7942261 | NM_005553    | KRTAP5-9  | keratin associated protein 5-9                                   | -0.097 | 0.935 | 2.74E-01 | 2.74E+01 |  |  |
| 7942267 | NM_00101271  | KRTAP5-10 | keratin associated protein 5-10                                  | 0.043  | 1.030 | 6.74E-01 | 6.74E+01 |  |  |
| 7942274 | ENST00000329 | OR7E87P   | olfactory receptor, family 7, subfamily 87                       | -0.045 | 0.969 | 8.35E-01 | 8.35E+01 |  |  |
| 7942279 | NM_018172    | FAM86C    | family with sequence similarity 86, member C                     | -0.011 | 0.992 | 9.61E-01 | 9.61E+01 |  |  |
| 7942284 | NM_00100203  | DEFB108B  | defensin, beta 108B                                              | 0.013  | 1.009 | 9.74E-01 | 9.74E+01 |  |  |
| 7942287 | ---          | ---       | ---                                                              | -0.161 | 0.894 | 5.53E-01 | 5.53E+01 |  |  |
| 7942289 | NM_018320    | RNF121    | ring finger protein 121                                          | 0.018  | 1.013 | 9.30E-01 | 9.30E+01 |  |  |
| 7942315 | NM_00114530  | LRTOMT    | leucine rich transmembrane and O-linked N-glycanase              | -0.008 | 0.995 | 9.66E-01 | 9.66E+01 |  |  |
| 7942328 | NM_000804    | FOLR3     | folate receptor 3 (gamma)                                        | 0.112  | 1.081 | 3.45E-01 | 3.45E+01 |  |  |
| 7942342 | NM_001567    | INPPL1    | inositol polyphosphate phosphatase                               | -0.027 | 0.981 | 8.48E-01 | 8.48E+01 |  |  |
| 7942381 | NM_033388    | ATG16L2   | ATG16 autophagy related 16-like 2                                | -0.068 | 0.954 | 4.73E-01 | 4.73E+01 |  |  |
| 7942400 | NM_176072    | P2RY2     | purinergic receptor P2Y, G-protein coupled, 2                    | -0.039 | 0.974 | 8.03E-01 | 8.03E+01 |  |  |
| 7942409 | NM_176796    | P2RY6     | pyrimidinergic receptor P2Y, G-protein coupled, 6                | 0.184  | 1.136 | 6.18E-02 | 6.18E+00 |  |  |
| 7942417 | NM_014786    | ARHGEF17  | Rho guanine nucleotide exchange factor 17                        | 0.041  | 1.029 | 7.55E-01 | 7.55E+01 |  |  |
| 7942439 | NM_032871    | RELT      | RELT tumor necrosis factor receptor                              | 0.001  | 1.001 | 9.96E-01 | 9.96E+01 |  |  |
| 7942453 | NM_021200    | PLEKHB1   | pleckstrin homology domain containing 1                          | -0.027 | 0.982 | 8.76E-01 | 8.76E+01 |  |  |
| 7942465 | NM_016055    | MRPL48    | mitochondrial ribosomal protein L48                              | -0.007 | 0.995 | 9.75E-01 | 9.75E+01 |  |  |
| 7942476 | NM_025155    | PAAF1     | proteasomal ATPase-associated factor 1                           | 0.084  | 1.060 | 6.60E-01 | 6.60E+01 |  |  |
| 7942503 | NM_016147    | PPME1     | protein phosphatase methylesterase 1                             | 0.057  | 1.040 | 7.54E-01 | 7.54E+01 |  |  |
| 7942520 | ---          | ---       | ---                                                              | -0.122 | 0.919 | 4.53E-01 | 4.53E+01 |  |  |
| 7942527 | NM_006591    | POLD3     | polymerase (DNA-directed), delta                                 | 0.182  | 1.134 | 1.52E-01 | 1.52E+01 |  |  |
| 7942544 | NM_00109863  | RNF169    | ring finger protein 169                                          | 0.038  | 1.027 | 8.08E-01 | 8.08E+01 |  |  |
| 7942551 | ---          | ---       | ---                                                              | 0.006  | 1.004 | 9.88E-01 | 9.88E+01 |  |  |
| 7942553 | NM_014752    | SPCS2     | signal peptidase complex subunit 2                               | 0.201  | 1.149 | 3.45E-02 | 3.45E+00 |  |  |
| 7942562 | NM_006656    | NEU3      | sialidase 3 (membrane sialidase)                                 | 0.158  | 1.116 | 1.25E-01 | 1.25E+01 |  |  |
| 7942586 | NM_001005    | RPS3      | ribosomal protein S3                                             | -0.020 | 0.986 | 8.79E-01 | 8.79E+01 |  |  |
| 7942592 | NR_000005    | SNORD15A  | small nucleolar RNA, C/D box 15A                                 | -0.086 | 0.942 | 8.50E-01 | 8.50E+01 |  |  |
| 7942594 | NR_000025    | SNORD15B  | small nucleolar RNA, C/D box 15B                                 | 0.117  | 1.084 | 7.25E-01 | 7.25E+01 |  |  |
| 7942596 | NM_001235    | SERPINH1  | serpin peptidase inhibitor, clade H, member 1                    | 0.078  | 1.056 | 5.39E-01 | 5.39E+01 |  |  |
| 7942611 | ---          | ---       | ---                                                              | 0.011  | 1.008 | 9.59E-01 | 9.59E+01 |  |  |
| 7942613 | NM_032564    | DGAT2     | diacylglycerol O-acyltransferase 2                               | -0.073 | 0.950 | 4.70E-01 | 4.70E+01 |  |  |
| 7942626 | NM_003369    | UVRAG     | UV radiation resistance associated                               | 0.108  | 1.078 | 2.81E-01 | 2.81E+01 |  |  |
| 7942650 | NM_020193    | C11orf30  | chromosome 11 open reading frame                                 | -0.115 | 0.923 | 3.95E-01 | 3.95E+01 |  |  |

|         |              |               |                                       |        |       |          |          |  |
|---------|--------------|---------------|---------------------------------------|--------|-------|----------|----------|--|
| 7942674 | NM_015516    | TSKU          | tsukushin                             | -0.076 | 0.949 | 5.35E-01 | 5.35E+01 |  |
| 7942679 | NM_018367    | ACER3         | alkaline ceramidase 3                 | 0.111  | 1.080 | 7.46E-01 | 7.46E+01 |  |
| 7942693 | NM_138706    | B3GNT6        | UDP-GlcNAc:betaGal beta-1,3-N-a       | 0.000  | 1.000 | 9.99E-01 | 9.99E+01 |  |
| 7942697 | NM_004055    | CAPN5         | calpain 5                             | -0.031 | 0.979 | 7.42E-01 | 7.42E+01 |  |
| 7942715 | NM_006189    | OMP           | olfactory marker protein              | -0.018 | 0.987 | 9.02E-01 | 9.02E+01 |  |
| 7942717 | NM_000260    | MYO7A         | myosin VIIA                           | -0.023 | 0.984 | 8.30E-01 | 8.30E+01 |  |
| 7942769 | AL834516     | DKFZp434E1119 | hypothetical protein DKFZp434E11      | -0.179 | 0.883 | 6.15E-02 | 6.15E+00 |  |
| 7942771 | AK096213     | FLJ38894      | hypothetical protein LOC646029        | 0.009  | 1.006 | 9.74E-01 | 9.74E+01 |  |
| 7942774 | NM_173039    | AQP11         | aquaporin 11                          | 0.090  | 1.064 | 4.06E-01 | 4.06E+01 |  |
| 7942779 | ---          | ---           | ---                                   | 0.177  | 1.130 | 5.35E-01 | 5.35E+01 |  |
| 7942783 | BC002752     | C11orf67      | chromosome 11 open reading fram       | -0.068 | 0.954 | 7.71E-01 | 7.71E+01 |  |
| 7942791 | NR_003287    | LOC100008589  | 28S ribosomal RNA                     | 0.016  | 1.011 | 8.33E-01 | 8.33E+01 |  |
| 7942793 | NM_003251    | THRSP         | thyroid hormone responsive (SPO       | -0.082 | 0.945 | 4.24E-01 | 4.24E+01 |  |
| 7942796 | NM_00102985  | KCTD21        | potassium channel tetramerisation     | -0.103 | 0.931 | 5.80E-01 | 5.80E+01 |  |
| 7942812 | ---          | ---           | ---                                   | -0.099 | 0.934 | 5.49E-01 | 5.49E+01 |  |
| 7942820 | ---          | ---           | ---                                   | 0.055  | 1.039 | 7.03E-01 | 7.03E+01 |  |
| 7942824 | NM_001031    | RPS28         | ribosomal protein S28                 | 0.073  | 1.052 | 6.04E-01 | 6.04E+01 |  |
| 7942839 | NM_015885    | PCF11         | PCF11, cleavage and polyadenylat      | -0.050 | 0.966 | 5.89E-01 | 5.89E+01 |  |
| 7942858 | NM_182603    | ANKRD42       | ankyrin repeat domain 42              | -0.054 | 0.963 | 8.10E-01 | 8.10E+01 |  |
| 7942875 | ---          | ---           | ---                                   | -0.004 | 0.997 | 9.85E-01 | 9.85E+01 |  |
| 7942877 | ---          | ---           | ---                                   | 0.056  | 1.040 | 8.82E-01 | 8.82E+01 |  |
| 7942879 | NM_018480    | TMEM126B      | transmembrane protein 126B            | 0.040  | 1.028 | 7.42E-01 | 7.42E+01 |  |
| 7942889 | NM_032273    | TMEM126A      | transmembrane protein 126A            | -0.020 | 0.986 | 9.36E-01 | 9.36E+01 |  |
| 7942912 | ---          | ---           | ---                                   | 0.128  | 1.093 | 5.16E-01 | 5.16E+01 |  |
| 7942914 | NM_152991    | EED           | embryonic ectoderm developmen         | -0.012 | 0.992 | 9.53E-01 | 9.53E+01 |  |
| 7942932 | NM_016401    | C11orf73      | chromosome 11 open reading fram       | -0.004 | 0.997 | 9.88E-01 | 9.88E+01 |  |
| 7942957 | NM_007173    | PRSS23        | protease, serine, 23                  | 0.189  | 1.140 | 2.28E-01 | 2.28E+01 |  |
| 7942964 | NM_022918    | TMEM135       | transmembrane protein 135             | 0.090  | 1.064 | 5.98E-01 | 5.98E+01 |  |
| 7943098 | NM_005959    | MTNR1B        | melatonin receptor 1B                 | 0.041  | 1.029 | 7.44E-01 | 7.44E+01 |  |
| 7943124 | ---          | ---           | ---                                   | -0.008 | 0.995 | 9.74E-01 | 9.74E+01 |  |
| 7943126 | NM_033395    | KIAA1731      | KIAA1731                              | -0.015 | 0.990 | 9.53E-01 | 9.53E+01 |  |
| 7943158 | NR_002569    | SCARNA9       | small Cajal body-specific RNA 9       | 0.154  | 1.113 | 1.35E-01 | 1.35E+01 |  |
| 7943160 | NR_002569    | SCARNA9       | small Cajal body-specific RNA 9       | -0.029 | 0.980 | 8.73E-01 | 8.73E+01 |  |
| 7943162 | BC012298     | C11orf54      | chromosome 11 open reading fram       | 0.100  | 1.072 | 6.37E-01 | 6.37E+01 |  |
| 7943176 | NM_004268    | MED17         | mediator complex subunit 17           | 0.033  | 1.023 | 8.59E-01 | 8.59E+01 |  |
| 7943193 | ---          | ---           | ---                                   | 0.292  | 1.224 | 2.79E-01 | 2.79E+01 |  |
| 7943218 | NM_015368    | PANX1         | pannexin 1                            | 0.056  | 1.040 | 8.76E-01 | 8.76E+01 |  |
| 7943226 | NM_00108048  | FOLR4         | folate receptor 4 (delta) homolog     | -0.035 | 0.976 | 7.46E-01 | 7.46E+01 |  |
| 7943231 | NM_017704    | ANKRD49       | ankyrin repeat domain 49              | 0.026  | 1.018 | 8.90E-01 | 8.90E+01 |  |
| 7943236 | NM_002033    | FUT4          | fucosyltransferase 4 (alpha (1,3) fu  | 0.010  | 1.007 | 9.63E-01 | 9.63E+01 |  |
| 7943288 | NM_032102    | SFRS2B        | splicing factor, arginine/serine-rich | -0.077 | 0.948 | 5.16E-01 | 5.16E+01 |  |
| 7943293 | NM_015036    | ENDOD1        | endonuclease domain containing 1      | 0.005  | 1.004 | 9.86E-01 | 9.86E+01 |  |
| 7943297 | NM_014679    | CEP57         | centrosomal protein 57kDa             | -0.069 | 0.953 | 6.29E-01 | 6.29E+01 |  |
| 7943347 | ---          | ---           | ---                                   | -0.018 | 0.988 | 9.20E-01 | 9.20E+01 |  |
| 7943398 | NM_00113014  | YAP1          | Yes-associated protein 1, 65kDa       | 0.004  | 1.003 | 9.84E-01 | 9.84E+01 |  |
| 7943413 | NM_001165    | BIRC3         | baculoviral IAP repeat-containing     | -0.246 | 0.843 | 1.48E-02 | 1.48E+00 |  |
| 7943424 | NM_001166    | BIRC2         | baculoviral IAP repeat-containing     | -0.231 | 0.852 | 1.36E-02 | 1.36E+00 |  |
| 7943552 | NM_015423    | AASDHPPT      | aminoadipate-semialdehyde dehy        | 0.054  | 1.038 | 6.35E-01 | 6.35E+01 |  |
| 7943573 | ENST00000299 | LOC643923     | hypothetical protein LOC643923        | -0.010 | 0.993 | 9.61E-01 | 9.61E+01 |  |
| 7943580 | NM_003478    | CUL5          | cullin 5                              | 0.258  | 1.196 | 2.38E-03 | 2.38E-01 |  |
| 7943605 | NM_000019    | ACAT1         | acetyl-Coenzyme A acetyltransfer      | 0.070  | 1.049 | 7.47E-01 | 7.47E+01 |  |
| 7943620 | NM_000051    | ATM           | ataxia telangiectasia mutated         | 0.087  | 1.062 | 5.10E-01 | 5.10E+01 |  |
| 7943690 | NM_004398    | DDX10         | DEAD (Asp-Glu-Ala-Asp) box polyp      | -0.036 | 0.975 | 8.77E-01 | 8.77E+01 |  |
| 7943711 | BC068577     | C11orf87      | chromosome 11 open reading fram       | -0.043 | 0.971 | 7.85E-01 | 7.85E+01 |  |
| 7943721 | NM_004109    | FDX1          | ferredoxin 1                          | 0.158  | 1.116 | 4.84E-02 | 4.84E+00 |  |
| 7943760 | NM_015191    | SIK2          | salt-inducible kinase 2               | -0.039 | 0.973 | 8.13E-01 | 8.13E+01 |  |
| 7943795 | NM_080659    | C11orf52      | chromosome 11 open reading fram       | -0.072 | 0.951 | 4.46E-01 | 4.46E+01 |  |
| 7943803 | NM_00103795  | DIXDC1        | DIX domain containing 1               | -0.039 | 0.973 | 8.80E-01 | 8.80E+01 |  |
| 7943827 | NM_001931    | DLAT          | dihydrolipoamide S-acetyltransfer     | -0.040 | 0.972 | 8.16E-01 | 8.16E+01 |  |
| 7943853 | NM_003002    | SDHD          | succinate dehydrogenase complex       | 0.092  | 1.066 | 4.18E-01 | 4.18E+01 |  |
| 7943882 | NM_000317    | PTS           | 6-pyruvoyltetrahydropterin synth      | 0.058  | 1.041 | 7.52E-01 | 7.52E+01 |  |
| 7943890 | ENST00000416 | LOC100132686  | hypothetical LOC100132686             | 0.111  | 1.080 | 6.76E-01 | 6.76E+01 |  |
| 7943892 | NM_181351    | NCAM1         | neural cell adhesion molecule 1       | 0.231  | 1.174 | 2.43E-01 | 2.43E+01 |  |
| 7943919 | NM_017868    | TTC12         | tetratricopeptide repeat domain 1     | -0.057 | 0.961 | 7.87E-01 | 7.87E+01 |  |
| 7943943 | NM_178510    | ANKK1         | ankyrin repeat and kinase domain      | 0.027  | 1.019 | 7.92E-01 | 7.92E+01 |  |
| 7943954 | ---          | ---           | ---                                   | 0.080  | 1.057 | 7.59E-01 | 7.59E+01 |  |
| 7943956 | ---          | ---           | ---                                   | 0.123  | 1.089 | 7.72E-01 | 7.72E+01 |  |
| 7943969 | NM_213621    | HTR3A         | 5-hydroxytryptamine (serotonin) r     | -0.017 | 0.988 | 9.22E-01 | 9.22E+01 |  |
| 7943984 | NM_006006    | ZBTB16        | zinc finger and BTB domain contain    | -0.079 | 0.947 | 4.82E-01 | 4.82E+01 |  |
| 7943998 | NM_006169    | NNMT          | nicotinamide N-methyltransferase      | -0.059 | 0.960 | 5.21E-01 | 5.21E+01 |  |
| 7944006 | NM_016090    | RBM7          | RNA binding motif protein 7           | 0.068  | 1.049 | 6.71E-01 | 6.71E+01 |  |
| 7944011 | NM_015523    | REXO2         | REX2, RNA exonuclease 2 homolog       | 0.029  | 1.020 | 8.75E-01 | 8.75E+01 |  |
| 7944035 | NM_000040    | APOC3         | apolipoprotein C-III                  | -0.002 | 0.999 | 9.90E-01 | 9.90E+01 |  |
| 7944042 | NM_002572    | PAFAH1B2      | platelet-activating factor acetylhyd  | 0.031  | 1.022 | 8.55E-01 | 8.55E+01 |  |
| 7944049 | NM_00104045  | SIDT2         | SID1 transmembrane family, mem        | 0.280  | 1.214 | 1.17E-01 | 1.17E+01 |  |
| 7944096 | NM_207343    | RNF214        | ring finger protein 214               | 0.060  | 1.043 | 6.29E-01 | 6.29E+01 |  |
| 7944113 | NM_014956    | CEP164        | centrosomal protein 164kDa            | 0.005  | 1.003 | 9.76E-01 | 9.76E+01 |  |

|         |              |           |                                      |        |       |          |          |  |  |
|---------|--------------|-----------|--------------------------------------|--------|-------|----------|----------|--|--|
| 7944147 | NM_001680    | FXYP2     | FXYP domain containing ion trans     | -0.051 | 0.965 | 6.38E-01 | 6.38E+01 |  |  |
| 7944152 | NM_001558    | IL10RA    | interleukin 10 receptor, alpha       | 0.129  | 1.093 | 2.79E-01 | 2.79E+01 |  |  |
| 7944179 | NM_000733    | CD3E      | CD3e molecule, epsilon (CD3-TCR      | -0.101 | 0.933 | 5.95E-01 | 5.95E+01 |  |  |
| 7944185 | NM_000073    | CD3G      | CD3g molecule, gamma (CD3-TCR        | -0.096 | 0.936 | 6.05E-01 | 6.05E+01 |  |  |
| 7944195 | NM_004788    | UBE4A     | ubiquitination factor E4A (UFD2 h    | 0.062  | 1.044 | 5.98E-01 | 5.98E+01 |  |  |
| 7944216 | NM_006476    | ATP5L     | ATP synthase, H+ transporting, mi    | -0.001 | 0.999 | 9.95E-01 | 9.95E+01 |  |  |
| 7944223 | NM_005933    | MLL       | myeloid/lymphoid or mixed-lineag     | -0.109 | 0.927 | 1.73E-01 | 1.73E+01 |  |  |
| 7944262 | ---          | ---       | ---                                  | -0.104 | 0.930 | 4.19E-01 | 4.19E+01 |  |  |
| 7944271 | NM_00108044  | TTC36     | tetratricopeptide repeat domain 3    | -0.033 | 0.978 | 8.37E-01 | 8.37E+01 |  |  |
| 7944275 | NM_032780    | TMEM25    | transmembrane protein 25             | -0.036 | 0.975 | 8.13E-01 | 8.13E+01 |  |  |
| 7944285 | NM_001655    | ARCN1     | archain 1                            | 0.013  | 1.009 | 9.44E-01 | 9.44E+01 |  |  |
| 7944335 | NM_001716    | CXCR5     | chemokine (C-X-C motif) receptor     | -0.035 | 0.976 | 9.36E-01 | 9.36E+01 |  |  |
| 7944339 | ---          | ---       | ---                                  | -0.087 | 0.942 | 7.44E-01 | 7.44E+01 |  |  |
| 7944341 | NM_006760    | UPK2      | uroplakin 2                          | -0.076 | 0.949 | 4.19E-01 | 4.19E+01 |  |  |
| 7944365 | NM_198489    | CCDC84    | coiled-coil domain containing 84     | -0.124 | 0.918 | 2.72E-01 | 2.72E+01 |  |  |
| 7944375 | NM_016146    | TRAPPC4   | trafficking protein particle comple  | -0.128 | 0.915 | 5.27E-01 | 5.27E+01 |  |  |
| 7944382 | NM_021729    | VPS11     | vacuolar protein sorting 11 homol    | 0.020  | 1.014 | 9.24E-01 | 9.24E+01 |  |  |
| 7944401 | NM_000190    | HMBS      | hydroxymethylbilane synthase         | -0.057 | 0.961 | 7.22E-01 | 7.22E+01 |  |  |
| 7944418 | NM_014807    | C2CD2L    | C2CD2-like                           | 0.011  | 1.008 | 9.33E-01 | 9.33E+01 |  |  |
| 7944435 | NM_015517    | HINFP     | histone H4 transcription factor      | -0.089 | 0.940 | 3.63E-01 | 3.63E+01 |  |  |
| 7944447 | NM_022169    | ABCG4     | ATP-binding cassette, sub-family G   | -0.024 | 0.984 | 8.31E-01 | 8.31E+01 |  |  |
| 7944463 | NM_024618    | NLRX1     | NLR family member X1                 | -0.113 | 0.925 | 1.17E-01 | 1.17E+01 |  |  |
| 7944478 | NM_024791    | PDZD3     | PDZ domain containing 3              | 0.056  | 1.039 | 6.55E-01 | 6.55E+01 |  |  |
| 7944493 | NM_005188    | CBL       | Cas-Br-M (murine) ecotropic retro    | 0.078  | 1.055 | 5.63E-01 | 5.63E+01 |  |  |
| 7944510 | NM_032015    | RNF26     | ring finger protein 26               | -0.058 | 0.960 | 6.49E-01 | 6.49E+01 |  |  |
| 7944516 | ---          | ---       | ---                                  | -0.058 | 0.960 | 5.88E-01 | 5.88E+01 |  |  |
| 7944525 | ---          | ---       | ---                                  | 0.125  | 1.090 | 2.57E-01 | 2.57E+01 |  |  |
| 7944530 | NM_178507    | OAF       | OAF homolog (Drosophila)             | -0.029 | 0.980 | 8.26E-01 | 8.26E+01 |  |  |
| 7944537 | NM_014352    | POU2F3    | POU class 2 homeobox 3               | 0.010  | 1.007 | 9.50E-01 | 9.50E+01 |  |  |
| 7944560 | NM_015313    | ARHGEF12  | Rho guanine nucleotide exchange      | 0.109  | 1.078 | 6.52E-01 | 6.52E+01 |  |  |
| 7944603 | NM_014619    | GRIK4     | glutamate receptor, ionotropic, ka   | -0.011 | 0.993 | 9.51E-01 | 9.51E+01 |  |  |
| 7944623 | NM_152715    | TBCEL     | tubulin folding cofactor E-like      | 0.174  | 1.128 | 1.58E-01 | 1.58E+01 |  |  |
| 7944667 | NM_003105    | SORL1     | sortilin-related receptor, L(DLR cl  | -0.074 | 0.950 | 7.44E-01 | 7.44E+01 |  |  |
| 7944765 | ---          | ---       | ---                                  | 0.005  | 1.003 | 9.77E-01 | 9.77E+01 |  |  |
| 7944769 | NM_020716    | GRAMD1B   | GRAM domain containing 1B            | -0.210 | 0.865 | 2.59E-01 | 2.59E+01 |  |  |
| 7944791 | ---          | ---       | ---                                  | -0.067 | 0.955 | 7.03E-01 | 7.03E+01 |  |  |
| 7944795 | NM_00100196  | OR4D5     | olfactory receptor, family 4, subfa  | -0.026 | 0.982 | 8.68E-01 | 8.68E+01 |  |  |
| 7944803 | NM_00113014  | VWA5A     | von Willebrand factor A domain co    | 0.219  | 1.164 | 8.43E-02 | 8.43E+00 |  |  |
| 7944825 | X64981       | OR10D1P   | olfactory receptor, family 10, subf  | 0.030  | 1.021 | 8.26E-01 | 8.26E+01 |  |  |
| 7944850 | NM_032811    | TBRG1     | transforming growth factor beta r    | -0.034 | 0.977 | 8.36E-01 | 8.36E+01 |  |  |
| 7944867 | NM_170601    | SIAE      | sialic acid acetyltransferase        | -0.031 | 0.978 | 9.19E-01 | 9.19E+01 |  |  |
| 7944876 | NM_006176    | NRGN      | neurogranin (protein kinase C sub    | -0.003 | 0.998 | 9.90E-01 | 9.90E+01 |  |  |
| 7944882 | NM_022370    | ROBO3     | roundabout, axon guidance recept     | -0.081 | 0.946 | 2.84E-01 | 2.84E+01 |  |  |
| 7944931 | NM_198277    | SLC37A2   | solute carrier family 37 (glycerol-3 | 0.259  | 1.197 | 8.14E-02 | 8.14E+00 |  |  |
| 7944955 | NM_022062    | PKNOX2    | PBX/knotted 1 homeobox 2             | -0.015 | 0.990 | 9.02E-01 | 9.02E+01 |  |  |
| 7944970 | ---          | ---       | ---                                  | -0.011 | 0.992 | 9.73E-01 | 9.73E+01 |  |  |
| 7944978 | NM_004879    | EI24      | etoposide induced 2.4 mRNA           | -0.011 | 0.992 | 9.68E-01 | 9.68E+01 |  |  |
| 7944991 | NM_152713    | STT3A     | STT3, subunit of the oligosacchary   | 0.186  | 1.137 | 9.97E-02 | 9.97E+00 |  |  |
| 7945014 | NM_001274    | CHEK1     | CHK1 checkpoint homolog (S. pom      | 0.217  | 1.162 | 5.08E-01 | 5.08E+01 |  |  |
| 7945058 | NM_024556    | FAM118B   | family with sequence similarity 11   | 0.059  | 1.042 | 6.30E-01 | 6.30E+01 |  |  |
| 7945069 | ---          | ---       | ---                                  | -0.115 | 0.924 | 5.72E-01 | 5.72E+01 |  |  |
| 7945071 | NM_017547    | FOXRED1   | FAD-dependent oxidoreductase de      | -0.015 | 0.989 | 9.33E-01 | 9.33E+01 |  |  |
| 7945084 | ---          | ---       | ---                                  | 0.054  | 1.038 | 9.18E-01 | 9.18E+01 |  |  |
| 7945086 | NM_00103966  | TIRAP     | toll-interleukin 1 receptor (TIR) do | -0.022 | 0.985 | 9.27E-01 | 9.27E+01 |  |  |
| 7945101 | NM_014026    | DCPS      | decapping enzyme, scavenger          | -0.003 | 0.998 | 9.92E-01 | 9.92E+01 |  |  |
| 7945125 | BC113593     | PRR10     | proline rich 10                      | -0.043 | 0.971 | 6.20E-01 | 6.20E+01 |  |  |
| 7945130 | ---          | ---       | ---                                  | -0.061 | 0.959 | 5.22E-01 | 5.22E+01 |  |  |
| 7945132 | NM_002017    | FLI1      | Friend leukemia virus integration 1  | 0.194  | 1.144 | 1.74E-03 | 1.74E-01 |  |  |
| 7945146 | NM_000890    | KCNJ5     | potassium inwardly-rectifying cha    | 0.011  | 1.007 | 9.35E-01 | 9.35E+01 |  |  |
| 7945156 | ---          | ---       | ---                                  | 0.326  | 1.254 | 3.75E-01 | 3.75E+01 |  |  |
| 7945158 | ---          | ---       | ---                                  | 0.001  | 1.000 | 9.99E-01 | 9.99E+01 |  |  |
| 7945162 | NM_003658    | BARX2     | BARX homeobox 2                      | 0.033  | 1.023 | 7.74E-01 | 7.74E+01 |  |  |
| 7945169 | NM_138788    | TMEM45B   | transmembrane protein 45B            | -0.106 | 0.929 | 7.40E-01 | 7.40E+01 |  |  |
| 7945182 | NM_001642    | APLP2     | amyloid beta (A4) precursor-like p   | 0.100  | 1.072 | 8.26E-01 | 8.26E+01 |  |  |
| 7945204 | NM_021978    | ST14      | suppression of tumorigenicity 14 (   | 0.046  | 1.033 | 7.13E-01 | 7.13E+01 |  |  |
| 7945226 | ---          | ---       | ---                                  | 0.092  | 1.066 | 7.36E-01 | 7.36E+01 |  |  |
| 7945228 | ENST00000318 | FLJ34521  | hypothetical protein LOC646383       | 0.025  | 1.018 | 9.16E-01 | 9.16E+01 |  |  |
| 7945232 | NM_139055    | ADAMTS15  | ADAM metalloproteinase with thro     | -0.016 | 0.989 | 9.50E-01 | 9.50E+01 |  |  |
| 7945241 | AK096377     | C11orf44  | chromosome 11 open reading fran      | -0.017 | 0.988 | 9.38E-01 | 9.38E+01 |  |  |
| 7945245 | NM_016522    | NTM       | neurotrophin                         | 0.023  | 1.016 | 8.96E-01 | 8.96E+01 |  |  |
| 7945262 | NM_032801    | JAM3      | junctional adhesion molecule 3       | -0.114 | 0.924 | 4.86E-01 | 4.86E+01 |  |  |
| 7945275 | NM_052875    | VPS26B    | vacuolar protein sorting 26 homol    | 0.005  | 1.003 | 9.85E-01 | 9.85E+01 |  |  |
| 7945283 | NM_014384    | ACAD8     | acyl-Coenzyme A dehydrogenase f      | -0.062 | 0.958 | 6.56E-01 | 6.56E+01 |  |  |
| 7945342 | NM_207366    | 40A35     | sepin 14                             | -0.030 | 0.979 | 9.19E-01 | 9.19E+01 |  |  |
| 7945344 | NR_024368    | tcag7.907 | hypothetical LOC402483               | -0.021 | 0.985 | 8.67E-01 | 8.67E+01 |  |  |
| 7945347 | ---          | ---       | ---                                  | 0.267  | 1.203 | 4.25E-01 | 4.25E+01 |  |  |
| 7945349 | NM_016526    | BET1L     | blocked early in transport 1 homo    | -0.031 | 0.979 | 8.75E-01 | 8.75E+01 |  |  |

|         |              |              |                                      |        |       |          |          |  |  |
|---------|--------------|--------------|--------------------------------------|--------|-------|----------|----------|--|--|
| 7945357 | NM_012239    | SIRT3        | sirtuin (silent mating type informa  | -0.114 | 0.924 | 1.27E-01 | 1.27E+01 |  |  |
| 7945368 | NM_00102529  | IFITM5       | interferon induced transmembran      | -0.143 | 0.906 | 2.50E-01 | 2.50E+01 |  |  |
| 7945377 | NM_00113505  | SIGIRR       | single immunoglobulin and toll-int   | -0.054 | 0.963 | 5.28E-01 | 5.28E+01 |  |  |
| 7945394 | NM_00101230  | ANO9         | anoctamin 9                          | 0.058  | 1.041 | 6.28E-01 | 6.28E+01 |  |  |
| 7945418 | ---          | ---          | ---                                  | -0.061 | 0.958 | 5.09E-01 | 5.09E+01 |  |  |
| 7945420 | NM_002939    | RNH1         | ribonuclease/angiogenin inhibitor    | 0.043  | 1.030 | 7.23E-01 | 7.23E+01 |  |  |
| 7945436 | NM_176795    | HRAS         | v-Ha-ras Harvey rat sarcoma viral    | -0.014 | 0.990 | 9.46E-01 | 9.46E+01 |  |  |
| 7945445 | BC039077     | C11orf35     | chromosome 11 open reading fram      | 0.004  | 1.003 | 9.74E-01 | 9.74E+01 |  |  |
| 7945460 | ---          | ---          | ---                                  | 0.027  | 1.019 | 7.39E-01 | 7.39E+01 |  |  |
| 7945462 | NM_004031    | IRF7         | interferon regulatory factor 7       | -0.047 | 0.968 | 6.67E-01 | 6.67E+01 |  |  |
| 7945475 | NM_021924    | MUPCDH       | mucin-like protocadherin             | -0.057 | 0.961 | 5.27E-01 | 5.27E+01 |  |  |
| 7945498 | NM_021920    | SCT          | secretin                             | 0.011  | 1.008 | 9.49E-01 | 9.49E+01 |  |  |
| 7945503 | NM_021008    | DEAF1        | deformed epidermal autoregulator     | -0.056 | 0.962 | 7.05E-01 | 7.05E+01 |  |  |
| 7945521 | NM_182612    | PDDC1        | Parkinson disease 7 domain conta     | 0.026  | 1.018 | 8.44E-01 | 8.44E+01 |  |  |
| 7945536 | NM_016564    | CEND1        | cell cycle exit and neuronal differe | 0.023  | 1.016 | 8.85E-01 | 8.85E+01 |  |  |
| 7945539 | NM_024698    | SLC25A22     | solute carrier family 25 (mitochond  | -0.008 | 0.994 | 9.64E-01 | 9.64E+01 |  |  |
| 7945550 | NM_018494    | LRDD         | leucine-rich repeats and death do    | -0.009 | 0.994 | 9.49E-01 | 9.49E+01 |  |  |
| 7945573 | NM_021128    | POLR2L       | polymerase (RNA) II (DNA directed    | -0.012 | 0.992 | 9.57E-01 | 9.57E+01 |  |  |
| 7945579 | NM_00114267  | CHID1        | chitinase domain containing 1        | 0.014  | 1.010 | 9.27E-01 | 9.27E+01 |  |  |
| 7945595 | NM_005961    | MUC6         | mucin 6, oligomeric mucus/gel-form   | -0.063 | 0.957 | 6.48E-01 | 6.48E+01 |  |  |
| 7945620 | NM_019009    | TOLLIP       | toll interacting protein             | -0.013 | 0.991 | 9.28E-01 | 9.28E+01 |  |  |
| 7945631 | NM_053005    | HCCA2        | HCCA2 protein                        | -0.057 | 0.961 | 5.53E-01 | 5.53E+01 |  |  |
| 7945641 | NM_004420    | DUSP8        | dual specificity phosphatase 8       | -0.088 | 0.941 | 4.01E-01 | 4.01E+01 |  |  |
| 7945645 | NM_00100592  | KRTAP5-1     | keratin associated protein 5-1       | -0.075 | 0.949 | 4.48E-01 | 4.48E+01 |  |  |
| 7945648 | NM_00100432  | KRTAP5-2     | keratin associated protein 5-2       | -0.010 | 0.993 | 9.53E-01 | 9.53E+01 |  |  |
| 7945652 | NM_00101270  | KRTAP5-3     | keratin associated protein 5-3       | -0.019 | 0.987 | 9.12E-01 | 9.12E+01 |  |  |
| 7945657 | NM_00101270  | KRTAP5-4     | keratin associated protein 5-4       | -0.110 | 0.926 | 3.43E-01 | 3.43E+01 |  |  |
| 7945663 | ---          | ---          | ---                                  | -0.025 | 0.983 | 8.78E-01 | 8.78E+01 |  |  |
| 7945678 | ENST00000391 | C11orf89     | chromosome 11 open reading fram      | -0.071 | 0.952 | 4.83E-01 | 4.83E+01 |  |  |
| 7945680 | NR_002196    | H19          | H19, imprinted maternally express    | 0.017  | 1.012 | 9.12E-01 | 9.12E+01 |  |  |
| 7945688 | NR_003512    | INS-IGF2     | INS-IGF2 readthrough transcript      | -0.034 | 0.977 | 6.51E-01 | 6.51E+01 |  |  |
| 7945712 | NM_199292    | TH           | tyrosine hydroxylase                 | -0.085 | 0.943 | 1.41E-01 | 1.41E+01 |  |  |
| 7945730 | NM_005170    | ASCL2        | achaete-scute complex homolog 2      | 0.234  | 1.176 | 1.37E-01 | 1.37E+01 |  |  |
| 7945734 | AB029488     | C11orf21     | chromosome 11 open reading fram      | 0.050  | 1.035 | 7.19E-01 | 7.19E+01 |  |  |
| 7945740 | NM_016093    | RPL26L1      | ribosomal protein L26-like 1         | 0.026  | 1.018 | 9.08E-01 | 9.08E+01 |  |  |
| 7945742 | NM_014555    | TRPM5        | transient receptor potential cation  | -0.074 | 0.950 | 5.82E-01 | 5.82E+01 |  |  |
| 7945767 | NM_000076    | CDKN1C       | cyclin-dependent kinase inhibitor    | -0.009 | 0.994 | 9.50E-01 | 9.50E+01 |  |  |
| 7945781 | NM_003311    | PHLDA2       | pleckstrin homology-like domain,     | -0.091 | 0.939 | 3.36E-01 | 3.36E+01 |  |  |
| 7945786 | NM_005969    | NAP1L4       | nucleosome assembly protein 1-li     | 0.021  | 1.015 | 9.04E-01 | 9.04E+01 |  |  |
| 7945803 | NM_00101443  | CARS         | cysteinyI-tRNA synthetase            | 0.027  | 1.019 | 8.27E-01 | 8.27E+01 |  |  |
| 7945829 | ---          | ---          | ---                                  | 0.127  | 1.092 | 8.16E-01 | 8.16E+01 |  |  |
| 7945857 | ENST00000332 | MRGPRG       | MAS-related GPR, member G            | -0.070 | 0.953 | 5.62E-01 | 5.62E+01 |  |  |
| 7945859 | NM_00103916  | MRGPRE       | MAS-related GPR, member E            | -0.013 | 0.991 | 9.49E-01 | 9.49E+01 |  |  |
| 7945864 | NM_00113052  | ZNF195       | zinc finger protein 195              | -0.002 | 0.999 | 9.95E-01 | 9.95E+01 |  |  |
| 7945873 | NR_002822    | MGC72080     | MGC72080 pseudogene                  | -0.044 | 0.970 | 8.55E-01 | 8.55E+01 |  |  |
| 7945875 | NM_00109965  | M86C // FAM8 | family with sequence similarity 86   | 0.092  | 1.066 | 6.70E-01 | 6.70E+01 |  |  |
| 7945892 | ---          | ---          | ---                                  | -0.045 | 0.969 | 8.94E-01 | 8.94E+01 |  |  |
| 7945894 | ---          | ---          | ---                                  | 0.048  | 1.034 | 9.12E-01 | 9.12E+01 |  |  |
| 7945896 | NM_020402    | CHRNA10      | cholinergic receptor, nicotinic, alp | -0.030 | 0.979 | 8.63E-01 | 8.63E+01 |  |  |
| 7945902 | NM_016320    | NUP98        | nucleoporin 98kDa                    | -0.088 | 0.941 | 4.32E-01 | 4.32E+01 |  |  |
| 7945942 | ---          | ---          | ---                                  | 0.155  | 1.114 | 6.44E-01 | 6.44E+01 |  |  |
| 7945944 | NM_001665    | RHOG         | ras homolog gene family, member      | -0.006 | 0.996 | 9.76E-01 | 9.76E+01 |  |  |
| 7945950 | ---          | ---          | ---                                  | 0.071  | 1.050 | 7.92E-01 | 7.92E+01 |  |  |
| 7945958 | NM_00100516  | OR52B4       | olfactory receptor, family 52, subf  | 0.086  | 1.062 | 5.59E-01 | 5.59E+01 |  |  |
| 7945962 | NM_003141    | TRIM21       | tripartite motif-containing 21       | 0.047  | 1.033 | 8.67E-01 | 8.67E+01 |  |  |
| 7945974 | AF439154     | C11orf40     | chromosome 11 open reading fram      | 0.088  | 1.063 | 2.44E-01 | 2.44E+01 |  |  |
| 7945989 | ---          | ---          | ---                                  | -0.144 | 0.905 | 1.35E-01 | 1.35E+01 |  |  |
| 7946004 | NM_00100475  | OR51S1       | olfactory receptor, family 51, subf  | -0.068 | 0.954 | 5.57E-01 | 5.57E+01 |  |  |
| 7946033 | NM_000518    | HBB          | hemoglobin, beta                     | 0.488  | 1.402 | 6.78E-01 | 6.78E+01 |  |  |
| 7946041 | NM_000519    | HBD          | hemoglobin, delta                    | 0.243  | 1.183 | 2.82E-01 | 2.82E+01 |  |  |
| 7946048 | NM_000559    | HBG1         | hemoglobin, gamma A                  | 0.018  | 1.013 | 9.18E-01 | 9.18E+01 |  |  |
| 7946054 | NM_000559    | HBG1         | hemoglobin, gamma A                  | 0.018  | 1.013 | 9.18E-01 | 9.18E+01 |  |  |
| 7946069 | NM_033180    | OR51B2       | olfactory receptor, family 51, subf  | 0.046  | 1.032 | 7.33E-01 | 7.33E+01 |  |  |
| 7946087 | NM_00100528  | OR52H1       | olfactory receptor, family 52, subf  | 0.070  | 1.049 | 8.31E-01 | 8.31E+01 |  |  |
| 7946089 | NM_033034    | TRIM5        | tripartite motif-containing 5        | 0.105  | 1.076 | 5.13E-01 | 5.13E+01 |  |  |
| 7946128 | NM_032127    | FAM160A2     | family with sequence similarity 16   | -0.050 | 0.966 | 6.29E-01 | 6.29E+01 |  |  |
| 7946149 | NM_001164    | APBB1        | amyloid beta (A4) precursor prote    | -0.029 | 0.980 | 8.84E-01 | 8.84E+01 |  |  |
| 7946180 | NM_006458    | TRIM3        | tripartite motif-containing 3        | -0.044 | 0.970 | 6.77E-01 | 6.77E+01 |  |  |
| 7946201 | NM_012402    | ARFIP2       | ADP-ribosylation factor interacting  | -0.075 | 0.949 | 6.00E-01 | 6.00E+01 |  |  |
| 7946211 | NM_015324    | RRP8         | ribosomal RNA processing 8, meth     | -0.030 | 0.980 | 9.10E-01 | 9.10E+01 |  |  |
| 7946221 | NM_006284    | TAF10        | TAF10 RNA polymerase II, TATA bo     | 0.036  | 1.025 | 7.51E-01 | 7.51E+01 |  |  |
| 7946228 | NM_000391    | TPP1         | tripeptidyl peptidase I              | 0.155  | 1.113 | 4.29E-01 | 4.29E+01 |  |  |
| 7946245 | NM_003737    | DCHS1        | dachsous 1 (Drosophila)              | -0.028 | 0.981 | 8.38E-01 | 8.38E+01 |  |  |
| 7946267 | NM_022061    | MRPL17       | mitochondrial ribosomal protein L    | 0.024  | 1.017 | 9.04E-01 | 9.04E+01 |  |  |
| 7946275 | NR_003945    | GVIN1        | GPase, very large interferon indu    | 0.051  | 1.036 | 8.25E-01 | 8.25E+01 |  |  |
| 7946340 | NM_024557    | RIC3         | resistance to inhibitors of choline  | 0.062  | 1.044 | 7.94E-01 | 7.94E+01 |  |  |
| 7946354 | NM_002315    | LMO1         | LIM domain only 1 (rhombotin 1)      | 0.033  | 1.023 | 7.94E-01 | 7.94E+01 |  |  |

|         |             |          |                                             |        |       |          |          |  |  |
|---------|-------------|----------|---------------------------------------------|--------|-------|----------|----------|--|--|
| 7946380 | NM_014818   | TRIM66   | tripartite motif-containing 66              | -0.018 | 0.988 | 9.19E-01 | 9.19E+01 |  |  |
| 7946426 | ---         | ---      | ---                                         | 0.012  | 1.008 | 9.78E-01 | 9.78E+01 |  |  |
| 7946428 | NM_020643   | C11orf16 | chromosome 11 open reading frame            | -0.030 | 0.979 | 8.32E-01 | 8.32E+01 |  |  |
| 7946439 | NM_020644   | TMEM9B   | TMEM9 domain family, member B               | 0.016  | 1.011 | 9.44E-01 | 9.44E+01 |  |  |
| 7946446 | NM_020645   | NRIP3    | nuclear receptor interacting protein        | -0.161 | 0.894 | 6.35E-01 | 6.35E+01 |  |  |
| 7946478 | NM_015213   | DENND5A  | DENN/MADD domain containing 5               | -0.182 | 0.882 | 1.95E-01 | 1.95E+01 |  |  |
| 7946504 | NM_015012   | TMEM41B  | transmembrane protein 41B                   | 0.053  | 1.038 | 7.48E-01 | 7.48E+01 |  |  |
| 7946516 | NM_030962   | SBF2     | SET binding factor 2                        | 0.138  | 1.101 | 5.23E-01 | 5.23E+01 |  |  |
| 7946559 | NM_00101799 | GNG10    | guanine nucleotide binding protein          | 0.224  | 1.168 | 1.53E-01 | 1.53E+01 |  |  |
| 7946563 | ---         | ---      | ---                                         | -0.096 | 0.935 | 4.70E-01 | 4.70E+01 |  |  |
| 7946565 | ---         | ---      | ---                                         | 0.050  | 1.036 | 2.32E-01 | 2.32E+01 |  |  |
| 7946567 | ---         | ---      | ---                                         | -0.118 | 0.921 | 4.20E-01 | 4.20E+01 |  |  |
| 7946569 | NM_016422   | RNF141   | ring finger protein 141                     | 0.072  | 1.051 | 6.72E-01 | 6.72E+01 |  |  |
| 7946589 | NM_130385   | MRV1     | murine retrovirus integration site          | 0.065  | 1.046 | 7.10E-01 | 7.10E+01 |  |  |
| 7946610 | NM_001418   | EIF4G2   | eukaryotic translation initiation factor    | 0.011  | 1.007 | 9.53E-01 | 9.53E+01 |  |  |
| 7946635 | NM_021211   | ZBED5    | zinc finger, BED-type containing 5          | -0.002 | 0.999 | 9.92E-01 | 9.92E+01 |  |  |
| 7946655 | NR_002207   | CSNK2A1P | casein kinase 2, alpha 1 polypeptide        | 0.035  | 1.025 | 8.92E-01 | 8.92E+01 |  |  |
| 7946659 | ---         | ---      | ---                                         | 0.025  | 1.018 | 8.02E-01 | 8.02E+01 |  |  |
| 7946661 | NM_015881   | DKK3     | dickkopf homolog 3 (Xenopus laevis)         | -0.071 | 0.952 | 4.35E-01 | 4.35E+01 |  |  |
| 7946676 | ---         | ---      | ---                                         | -0.059 | 0.960 | 7.53E-01 | 7.53E+01 |  |  |
| 7946680 | NM_032320   | BTBD10   | BTB (POZ) domain containing 10              | 0.113  | 1.081 | 3.70E-01 | 3.70E+01 |  |  |
| 7946697 | NM_012250   | RRAS2    | related RAS viral (r-ras) oncogene          | -0.039 | 0.973 | 7.73E-01 | 7.73E+01 |  |  |
| 7946703 | NM_016451   | COPB1    | coatamer protein complex, subunit           | -0.031 | 0.979 | 8.68E-01 | 8.68E+01 |  |  |
| 7946728 | NM_148976   | PSMA1    | proteasome (prosome, macropain)             | -0.057 | 0.961 | 7.15E-01 | 7.15E+01 |  |  |
| 7946742 | NM_024514   | CYP2R1   | cytochrome P450, family 2, subfamily        | -0.138 | 0.909 | 4.75E-01 | 4.75E+01 |  |  |
| 7946749 | NM_001741   | CALCA    | calcitonin-related polypeptide alpha        | -0.084 | 0.943 | 4.01E-01 | 4.01E+01 |  |  |
| 7946781 | NM_175058   | PLEKHA7  | pleckstrin homology domain containing       | 0.191  | 1.141 | 2.01E-02 | 2.01E+00 |  |  |
| 7946807 | NM_021029   | RPL36A   | ribosomal protein L36a                      | 0.010  | 1.007 | 9.56E-01 | 9.56E+01 |  |  |
| 7946812 | NM_001017   | RPS13    | ribosomal protein S13                       | -0.004 | 0.997 | 9.88E-01 | 9.88E+01 |  |  |
| 7946849 | ---         | ---      | ---                                         | 0.009  | 1.006 | 9.83E-01 | 9.83E+01 |  |  |
| 7946853 | NM_000525   | KCNJ11   | potassium inwardly-rectifying channel       | -0.045 | 0.970 | 8.06E-01 | 8.06E+01 |  |  |
| 7946860 | NM_000352   | ABCC8    | ATP-binding cassette, sub-family C          | 0.003  | 1.002 | 9.87E-01 | 9.87E+01 |  |  |
| 7946903 | NM_153676   | USH1C    | Usher syndrome 1C (autosomal recessive)     | -0.068 | 0.954 | 4.19E-01 | 4.19E+01 |  |  |
| 7946933 | NM_012139   | SERGEF   | secretion regulating guanine nucleotide     | -0.091 | 0.939 | 4.96E-01 | 4.96E+01 |  |  |
| 7946957 | NM_138421   | SAA1     | serum amyloid A-like 1                      | -0.027 | 0.982 | 9.11E-01 | 9.11E+01 |  |  |
| 7947015 | NM_006292   | TSG101   | tumor susceptibility gene 101               | 0.035  | 1.025 | 8.52E-01 | 8.52E+01 |  |  |
| 7947027 | NM_00104069 | UEVLD    | UEV and lactate/malate dehydrogenase        | 0.124  | 1.090 | 5.41E-01 | 5.41E+01 |  |  |
| 7947040 | NM_194285   | SPTY2D1  | SPT2, Suppressor of Ty, domain containing   | 0.087  | 1.062 | 4.49E-01 | 4.49E+01 |  |  |
| 7947076 | NM_006906   | PTPN5    | protein tyrosine phosphatase, non-receptor  | -0.076 | 0.949 | 4.05E-01 | 4.05E+01 |  |  |
| 7947129 | NM_00102986 | DBX1     | developing brain homeobox 1                 | 0.027  | 1.019 | 8.71E-01 | 8.71E+01 |  |  |
| 7947138 | NM_022725   | FANCF    | Fanconi anemia, complementation group       | 0.056  | 1.040 | 7.72E-01 | 7.72E+01 |  |  |
| 7947147 | NM_148893   | SVIP     | small VCP/p97-interacting protein           | -0.047 | 0.968 | 8.33E-01 | 8.33E+01 |  |  |
| 7947189 | NM_030771   | CCDC34   | coiled-coil domain containing 34            | 0.073  | 1.052 | 6.95E-01 | 6.95E+01 |  |  |
| 7947221 | NM_018362   | LIN7C    | lin-7 homolog C (C. elegans)                | 0.114  | 1.082 | 3.56E-01 | 3.56E+01 |  |  |
| 7947245 | M30627      | HSP90AA2 | heat shock protein 90kDa alpha (class       | -0.055 | 0.963 | 7.24E-01 | 7.24E+01 |  |  |
| 7947270 | NM_002233   | KCNA4    | potassium voltage-gated channel, subfamily  | 0.027  | 1.019 | 8.41E-01 | 8.41E+01 |  |  |
| 7947358 | NM_002901   | RCN1     | reticulocalbin 1, EF-hand calcium binding   | 0.022  | 1.015 | 9.30E-01 | 9.30E+01 |  |  |
| 7947396 | NM_001326   | CSTF3    | cleavage stimulation factor, 3' processing  | 0.037  | 1.026 | 7.59E-01 | 7.59E+01 |  |  |
| 7947421 | ---         | ---      | ---                                         | -0.017 | 0.988 | 9.60E-01 | 9.60E+01 |  |  |
| 7947423 | ---         | ---      | ---                                         | -0.004 | 0.997 | 9.93E-01 | 9.93E+01 |  |  |
| 7947425 | NM_203330   | CD59     | CD59 molecule, complement regulatory        | -0.196 | 0.873 | 4.60E-01 | 4.60E+01 |  |  |
| 7947434 | NM_033406   | FBXO3    | F-box protein 3                             | 0.047  | 1.033 | 8.35E-01 | 8.35E+01 |  |  |
| 7947450 | NM_005574   | LMO2     | LIM domain only 2 (rhombotin-like)          | 0.074  | 1.053 | 4.02E-01 | 4.02E+01 |  |  |
| 7947462 | NM_145804   | ABTB2    | ankyrin repeat and BTB (POZ) domain         | -0.133 | 0.912 | 1.29E-01 | 1.29E+01 |  |  |
| 7947481 | NM_198381   | ELF5     | E74-like factor 5 (ets domain transcription | -0.055 | 0.963 | 6.29E-01 | 6.29E+01 |  |  |
| 7947490 | NM_015957   | APIP     | APAF1 interacting protein                   | -0.204 | 0.868 | 2.58E-01 | 2.58E+01 |  |  |
| 7947526 | ---         | ---      | ---                                         | -0.067 | 0.955 | 5.20E-01 | 5.20E+01 |  |  |
| 7947528 | NM_014186   | COMMD9   | COMM domain containing 9                    | -0.059 | 0.960 | 7.51E-01 | 7.51E+01 |  |  |
| 7947531 | NM_014186   | COMMD9   | COMM domain containing 9                    | 0.092  | 1.066 | 5.61E-01 | 5.61E+01 |  |  |
| 7947540 | NM_145803   | TRAF6    | TNF receptor-associated factor 6            | -0.010 | 0.993 | 9.63E-01 | 9.63E+01 |  |  |
| 7947563 | NM_021926   | ALX4     | ALX homeobox 4                              | -0.099 | 0.934 | 1.95E-01 | 1.95E+01 |  |  |
| 7947570 | NM_00107678 | TP53I11  | tumor protein p53 inducible protein         | -0.044 | 0.970 | 7.04E-01 | 7.04E+01 |  |  |
| 7947599 | NM_003654   | CHST1    | carbohydrate (keratan sulfate) 6-sulfatase  | -0.030 | 0.979 | 7.94E-01 | 7.94E+01 |  |  |
| 7947609 | NM_004813   | PEX16    | peroxisomal biogenesis factor 16            | -0.026 | 0.982 | 8.22E-01 | 8.22E+01 |  |  |
| 7947624 | NM_00110180 | PHF21A   | PHD finger protein 21A                      | -0.017 | 0.988 | 9.01E-01 | 9.01E+01 |  |  |
| 7947649 | NM_000741   | CHRM4    | cholinergic receptor, muscarinic 4          | -0.041 | 0.972 | 7.72E-01 | 7.72E+01 |  |  |
| 7947652 | NM_017749   | AMBRA1   | autophagy/beclin-1 regulator 1              | -0.088 | 0.941 | 2.94E-01 | 2.94E+01 |  |  |
| 7947674 | ---         | ---      | ---                                         | -0.025 | 0.983 | 9.54E-01 | 9.54E+01 |  |  |
| 7947676 | NM_173811   | HARBI1   | harbinger transposase derived 1             | 0.074  | 1.052 | 6.08E-01 | 6.08E+01 |  |  |
| 7947681 | NM_004308   | ARHGAP1  | Rho GTPase activating protein 1             | 0.027  | 1.019 | 9.11E-01 | 9.11E+01 |  |  |
| 7947694 | NM_00100893 | CKAP5    | cytoskeleton associated protein 5           | -0.006 | 0.996 | 9.81E-01 | 9.81E+01 |  |  |
| 7947740 | ---         | ---      | ---                                         | 0.045  | 1.032 | 7.61E-01 | 7.61E+01 |  |  |
| 7947742 | ---         | ---      | ---                                         | 0.049  | 1.035 | 7.90E-01 | 7.90E+01 |  |  |
| 7947784 | NM_032389   | ARFGAP2  | ADP-ribosylation factor GTPase activating   | -0.004 | 0.997 | 9.84E-01 | 9.84E+01 |  |  |
| 7947801 | NM_016223   | PACSLN3  | protein kinase C and casein kinase          | -0.047 | 0.968 | 7.16E-01 | 7.16E+01 |  |  |
| 7947815 | NM_001610   | ACP2     | acid phosphatase 2, lysosomal               | 0.379  | 1.301 | 8.58E-02 | 8.58E+00 |  |  |
| 7947828 | NM_000256   | MYBPC3   | myosin binding protein C, cardiac           | 0.033  | 1.023 | 7.70E-01 | 7.70E+01 |  |  |

|         |              |              |                                     |        |       |          |          |  |  |
|---------|--------------|--------------|-------------------------------------|--------|-------|----------|----------|--|--|
| 7947861 | NM_00108054  | SPI1         | spleen focus forming virus (SFFV) p | 0.101  | 1.073 | 5.24E-01 | 5.24E+01 |  |  |
| 7947867 | NM_002804    | PSMC3        | proteasome (prosome, macropain      | -0.064 | 0.957 | 7.05E-01 | 7.05E+01 |  |  |
| 7947881 | NM_005055    | RAPSN        | receptor-associated protein of the  | -0.035 | 0.976 | 7.63E-01 | 7.63E+01 |  |  |
| 7947892 | ---          | ---          | ---                                 | -0.167 | 0.891 | 5.94E-01 | 5.94E+01 |  |  |
| 7947894 | NM_198700    | CUGBP1       | CUG triplet repeat, RNA binding p   | 0.022  | 1.015 | 8.62E-01 | 8.62E+01 |  |  |
| 7947915 | ---          | ---          | ---                                 | 0.008  | 1.006 | 9.71E-01 | 9.71E+01 |  |  |
| 7947917 | NM_016506    | KBTBD4       | kelch repeat and BTB (POZ) domai    | -0.050 | 0.966 | 6.94E-01 | 6.94E+01 |  |  |
| 7947928 | NM_031909    | C1QTNF4      | C1q and tumor necrosis factor rela  | -0.103 | 0.931 | 1.73E-01 | 1.73E+01 |  |  |
| 7947934 | NM_014342    | MTCH2        | mitochondrial carrier homolog 2 (   | 0.068  | 1.048 | 6.76E-01 | 6.76E+01 |  |  |
| 7947947 | NM_024783    | AGBL2        | ATP/GTP binding protein-like 2      | -0.021 | 0.986 | 9.54E-01 | 9.54E+01 |  |  |
| 7947969 | NM_015308    | FNBP4        | formin binding protein 4            | -0.028 | 0.981 | 8.67E-01 | 8.67E+01 |  |  |
| 7947989 | ---          | ---          | ---                                 | 0.040  | 1.028 | 9.07E-01 | 9.07E+01 |  |  |
| 7947991 | NM_015231    | NUP160       | nucleoporin 160kDa                  | 0.033  | 1.023 | 8.18E-01 | 8.18E+01 |  |  |
| 7948033 | ---          | ---          | ---                                 | 0.157  | 1.115 | 6.05E-01 | 6.05E+01 |  |  |
| 7948037 | ---          | ---          | ---                                 | 0.092  | 1.066 | 9.00E-01 | 9.00E+01 |  |  |
| 7948054 | ---          | ---          | ---                                 | 0.000  | 1.000 | 1.00E+00 | 1.00E+02 |  |  |
| 7948088 | NM_032315    | SLC25A33     | solute carrier family 25, member 3  | 0.105  | 1.075 | 6.00E-01 | 6.00E+01 |  |  |
| 7948092 | NR_003034    | LOC441601    | septin 7 pseudogene                 | -0.059 | 0.960 | 6.40E-01 | 6.40E+01 |  |  |
| 7948113 | NR_027688    | OR7E5P       | olfactory receptor, family 7, subfa | -0.007 | 0.995 | 9.82E-01 | 9.82E+01 |  |  |
| 7948176 | NM_033396    | TNKS1BP1     | tankyrase 1 binding protein 1, 182  | 0.001  | 1.000 | 9.97E-01 | 9.97E+01 |  |  |
| 7948192 | NM_003146    | SSRP1        | structure specific recognition prot | -0.127 | 0.916 | 2.73E-01 | 2.73E+01 |  |  |
| 7948211 | AB209132     | SSRP1        | structure specific recognition prot | -0.055 | 0.963 | 8.92E-01 | 8.92E+01 |  |  |
| 7948213 | NM_006093    | PRG3         | proteoglycan 3                      | -0.016 | 0.989 | 9.28E-01 | 9.28E+01 |  |  |
| 7948229 | NM_017611    | SLC43A3      | solute carrier family 43, member 3  | -0.031 | 0.979 | 9.51E-01 | 9.51E+01 |  |  |
| 7948249 | NM_003627    | SLC43A1      | solute carrier family 43, member 1  | -0.044 | 0.970 | 6.88E-01 | 6.88E+01 |  |  |
| 7948267 | NM_012456    | TIMM10       | translocase of inner mitochondrial  | 0.023  | 1.016 | 9.42E-01 | 9.42E+01 |  |  |
| 7948274 | NM_004223    | UBE2L6       | ubiquitin-conjugating enzyme E2L    | 0.149  | 1.109 | 2.44E-01 | 2.44E+01 |  |  |
| 7948282 | NM_145008    | YPEL4        | yippee-like 4 (Drosophila)          | 0.070  | 1.050 | 6.01E-01 | 6.01E+01 |  |  |
| 7948293 | NM_153450    | MED19        | mediator complex subunit 19         | 0.063  | 1.044 | 5.71E-01 | 5.71E+01 |  |  |
| 7948303 | ---          | ---          | ---                                 | -0.061 | 0.959 | 5.53E-01 | 5.53E+01 |  |  |
| 7948306 | ---          | ---          | ---                                 | 0.122  | 1.088 | 7.11E-01 | 7.11E+01 |  |  |
| 7948314 | NM_00100447  | OR10Q1       | olfactory receptor, family 10, subf | 0.086  | 1.061 | 4.74E-01 | 4.74E+01 |  |  |
| 7948332 | NM_004811    | LPXN         | leupaxin                            | -0.119 | 0.921 | 1.71E-01 | 1.71E+01 |  |  |
| 7948367 | ---          | ---          | ---                                 | -0.026 | 0.982 | 8.98E-01 | 8.98E+01 |  |  |
| 7948379 | NM_002556    | OSBP         | oxysterol binding protein           | -0.012 | 0.992 | 9.32E-01 | 9.32E+01 |  |  |
| 7948397 | ---          | ---          | ---                                 | -0.040 | 0.973 | 9.46E-01 | 9.46E+01 |  |  |
| 7948399 | NM_152716    | PATL1        | protein associated with topoisom    | 0.067  | 1.047 | 5.95E-01 | 5.95E+01 |  |  |
| 7948420 | NM_001444    | FABP5        | fatty acid binding protein 5 (psori | 0.273  | 1.208 | 5.65E-02 | 5.65E+00 |  |  |
| 7948424 | NM_017840    | MRPL16       | mitochondrial ribosomal protein L   | 0.017  | 1.012 | 9.33E-01 | 9.33E+01 |  |  |
| 7948470 | NM_004778    | GPR44        | G protein-coupled receptor 44       | -0.074 | 0.950 | 3.62E-01 | 3.62E+01 |  |  |
| 7948476 | NM_014502    | PRPF19       | PRP19/PSO4 pre-mRNA processing      | 0.074  | 1.053 | 5.43E-01 | 5.43E+01 |  |  |
| 7948493 | NM_016582    | SLC15A3      | solute carrier family 15, member 3  | 0.128  | 1.093 | 2.99E-01 | 2.99E+01 |  |  |
| 7948502 | ---          | ---          | ---                                 | -0.220 | 0.859 | 5.07E-01 | 5.07E+01 |  |  |
| 7948504 | NM_017966    | VPS37C       | vacuolar protein sorting 37 homol   | 0.019  | 1.013 | 8.98E-01 | 8.98E+01 |  |  |
| 7948511 | NM_152718    | VWCE         | von Willebrand factor C and EGF d   | -0.052 | 0.964 | 5.30E-01 | 5.30E+01 |  |  |
| 7948534 | NM_001923    | DDB1         | damage-specific DNA binding prot    | 0.059  | 1.042 | 6.09E-01 | 6.09E+01 |  |  |
| 7948565 | NM_00116145  | CYBASC3      | cytochrome b, ascorbate depende     | -0.011 | 0.992 | 9.64E-01 | 9.64E+01 |  |  |
| 7948574 | NM_024811    | CPSF7        | cleavage and polyadenylation spe    | -0.060 | 0.959 | 5.63E-01 | 5.63E+01 |  |  |
| 7948588 | NM_004200    | SYT7         | synaptotagmin VII                   | -0.037 | 0.975 | 7.56E-01 | 7.56E+01 |  |  |
| 7948599 | ENST00000244 | DKFZP434K028 | hypothetical LOC26070               | -0.011 | 0.993 | 9.51E-01 | 9.51E+01 |  |  |
| 7948606 | NM_014206    | C11orf10     | chromosome 11 open reading fran     | 0.050  | 1.035 | 7.31E-01 | 7.31E+01 |  |  |
| 7948612 | NM_013402    | FADS1        | fatty acid desaturase 1             | -0.087 | 0.941 | 6.19E-01 | 6.19E+01 |  |  |
| 7948630 | NM_021727    | FADS3        | fatty acid desaturase 3             | -0.042 | 0.972 | 6.85E-01 | 6.85E+01 |  |  |
| 7948643 | NM_013401    | RAB3IL1      | RAB3A interacting protein (rabin3   | 0.005  | 1.004 | 9.74E-01 | 9.74E+01 |  |  |
| 7948656 | NM_002032    | FTH1         | ferritin, heavy polypeptide 1       | -0.021 | 0.985 | 9.64E-01 | 9.64E+01 |  |  |
| 7948667 | NM_001620    | AHNAK        | AHNAK nucleoprotein                 | 0.145  | 1.105 | 2.05E-01 | 2.05E+01 |  |  |
| 7948679 | NM_001404    | EEF1G        | eukaryotic translation elongation   | 0.007  | 1.005 | 9.81E-01 | 9.81E+01 |  |  |
| 7948685 | NM_022830    | TUT1         | terminal uridylyl transferase 1, U6 | -0.029 | 0.980 | 8.34E-01 | 8.34E+01 |  |  |
| 7948696 | NM_004739    | MTA2         | metastasis associated 1 family, me  | 0.003  | 1.002 | 9.88E-01 | 9.88E+01 |  |  |
| 7948718 | NM_153265    | EML3         | echinoderm microtubule associat     | -0.002 | 0.999 | 9.91E-01 | 9.91E+01 |  |  |
| 7948741 | NM_012200    | B3GAT3       | beta-1,3-glucuronyltransferase 3    | -0.084 | 0.943 | 6.90E-01 | 6.90E+01 |  |  |
| 7948744 | NM_198335    | GANAB        | glucosidase, alpha; neutral AB      | 0.039  | 1.027 | 7.52E-01 | 7.52E+01 |  |  |
| 7948772 | NM_030628    | INTS5        | integrator complex subunit 5        | 0.005  | 1.003 | 9.81E-01 | 9.81E+01 |  |  |
| 7948775 | NM_024099    | C11orf48     | chromosome 11 open reading fran     | -0.038 | 0.974 | 8.23E-01 | 8.23E+01 |  |  |
| 7948782 | NM_015853    | UBXN1        | UBX domain protein 1                | -0.175 | 0.886 | 5.88E-02 | 5.88E+00 |  |  |
| 7948798 | NM_00113070  | BSCL2        | Berardinelli-Seip congenital lipody | -0.021 | 0.985 | 9.22E-01 | 9.22E+01 |  |  |
| 7948814 | NM_00107955  | HNRNPUL2     | heterogeneous nuclear ribonucle     | -0.040 | 0.972 | 7.50E-01 | 7.50E+01 |  |  |
| 7948829 | NM_024784    | ZBTB3        | zinc finger and BTB domain contai   | -0.087 | 0.941 | 2.47E-01 | 2.47E+01 |  |  |
| 7948834 | NM_006473    | TAF6L        | TAF6-like RNA polymerase II, p300   | 0.012  | 1.009 | 9.47E-01 | 9.47E+01 |  |  |
| 7948836 | NM_00108050  | TMEM223      | transmembrane protein 223           | -0.045 | 0.969 | 8.16E-01 | 8.16E+01 |  |  |
| 7948839 | NM_006362    | NXF1         | nuclear RNA export factor 1         | -0.144 | 0.905 | 6.30E-02 | 6.30E+00 |  |  |
| 7948864 | NM_003164    | STX5         | syntaxin 5                          | -0.023 | 0.984 | 9.01E-01 | 9.01E+01 |  |  |
| 7948879 | ---          | ---          | ---                                 | -0.088 | 0.941 | 6.66E-01 | 6.66E+01 |  |  |
| 7948881 | NM_018093    | WDR74        | WD repeat domain 74                 | -0.145 | 0.905 | 1.81E-01 | 1.81E+01 |  |  |
| 7948894 | NR_002716    | RNU2-1       | RNA, U2 small nuclear 1             | -0.248 | 0.842 | 4.98E-01 | 4.98E+01 |  |  |
| 7948898 | NR_002560    | SNORD31      | small nucleolar RNA, C/D box 31     | 0.024  | 1.017 | 9.67E-01 | 9.67E+01 |  |  |
| 7948900 | NR_002561    | SNORD30      | small nucleolar RNA, C/D box 30     | -0.292 | 0.817 | 2.30E-01 | 2.30E+01 |  |  |

|         |              |              |                                                |        |       |          |          |  |  |
|---------|--------------|--------------|------------------------------------------------|--------|-------|----------|----------|--|--|
| 7948902 | NR_002559    | SNORD29      | small nucleolar RNA, C/D box 29                | -0.144 | 0.905 | 6.24E-01 | 6.24E+01 |  |  |
| 7948904 | NR_002562    | SNORD28      | small nucleolar RNA, C/D box 28                | -0.158 | 0.896 | 6.91E-01 | 6.91E+01 |  |  |
| 7948906 | NR_002563    | SNORD27      | small nucleolar RNA, C/D box 27                | -0.229 | 0.853 | 5.55E-01 | 5.55E+01 |  |  |
| 7948908 | NR_002564    | SNORD26      | small nucleolar RNA, C/D box 26                | -0.059 | 0.960 | 8.64E-01 | 8.64E+01 |  |  |
| 7948910 | NR_002565    | SNORD25      | small nucleolar RNA, C/D box 25                | -0.048 | 0.967 | 9.37E-01 | 9.37E+01 |  |  |
| 7948912 | NM_000738    | CHRM1        | cholinergic receptor, muscarinic 1             | -0.012 | 0.992 | 9.53E-01 | 9.53E+01 |  |  |
| 7948918 | ---          | ---          | ---                                            | -0.006 | 0.996 | 9.75E-01 | 9.75E+01 |  |  |
| 7948920 | NM_004790    | SLC22A6      | solute carrier family 22 (organic anion)       | 0.015  | 1.010 | 9.17E-01 | 9.17E+01 |  |  |
| 7948937 | NM_004254    | SLC22A8      | solute carrier family 22 (organic anion)       | -0.117 | 0.922 | 3.47E-01 | 3.47E+01 |  |  |
| 7948973 | NM_054108    | HRASL5       | HRAS-like suppressor family, member 5          | -0.044 | 0.970 | 7.54E-01 | 7.54E+01 |  |  |
| 7948987 | NM_007069    | PLA2G16      | phospholipase A2, group XVI                    | -0.125 | 0.917 | 5.55E-01 | 5.55E+01 |  |  |
| 7948995 | ENST00000398 | ATL3         | atlastin GTPase 3                              | -0.012 | 0.991 | 9.56E-01 | 9.56E+01 |  |  |
| 7948997 | NM_015459    | ATL3         | atlastin GTPase 3                              | -0.074 | 0.950 | 5.83E-01 | 5.83E+01 |  |  |
| 7949015 | NM_00114493  | LOC65998     | hypothetical protein LOC65998                  | -0.058 | 0.960 | 6.27E-01 | 6.27E+01 |  |  |
| 7949033 | NM_014067    | MACROD1      | MACRO domain containing 1                      | -0.058 | 0.960 | 4.06E-01 | 4.06E+01 |  |  |
| 7949046 | NM_00103367  | TRP1         | tRNA phosphotransferase 1                      | -0.050 | 0.966 | 7.42E-01 | 7.42E+01 |  |  |
| 7949058 | NM_005528    | DNAJC4       | DnaJ (Hsp40) homolog, subfamily 4              | -0.074 | 0.950 | 5.57E-01 | 5.57E+01 |  |  |
| 7949060 | NM_138689    | PPP1R14B     | protein phosphatase 1, regulatory subunit 14B  | -0.229 | 0.853 | 3.48E-03 | 3.48E-01 |  |  |
| 7949067 | NM_004322    | BAD          | BCL2-associated agonist of cell death          | -0.071 | 0.952 | 4.12E-01 | 4.12E+01 |  |  |
| 7949075 | NM_016404    | TRMT112      | tRNA methyltransferase 11-2 homolog            | -0.042 | 0.971 | 7.87E-01 | 7.87E+01 |  |  |
| 7949080 | NM_015080    | NRXN2        | neurexin 2                                     | -0.037 | 0.975 | 7.88E-01 | 7.88E+01 |  |  |
| 7949104 | NM_00109867  | RASGRP2      | RAS guanyl releasing protein 2 (calcium)       | 0.066  | 1.047 | 5.48E-01 | 5.48E+01 |  |  |
| 7949146 | NM_004630    | SF1          | splicing factor 1                              | -0.009 | 0.994 | 9.53E-01 | 9.53E+01 |  |  |
| 7949172 | NM_004579    | MAP4K2       | mitogen-activated protein kinase 4             | -0.068 | 0.954 | 5.93E-01 | 5.93E+01 |  |  |
| 7949206 | NM_130802    | MEN1         | multiple endocrine neoplasia 1                 | 0.003  | 1.002 | 9.86E-01 | 9.86E+01 |  |  |
| 7949227 | NM_017525    | CDC42BPG     | CDC42 binding protein kinase gamma             | -0.037 | 0.975 | 7.15E-01 | 7.15E+01 |  |  |
| 7949264 | NM_006795    | EHD1         | EH-domain containing 1                         | -0.156 | 0.897 | 9.17E-02 | 9.17E+00 |  |  |
| 7949273 | ---          | ---          | ---                                            | -0.022 | 0.985 | 9.02E-01 | 9.02E+01 |  |  |
| 7949275 | ---          | ---          | ---                                            | -0.014 | 0.990 | 9.40E-01 | 9.40E+01 |  |  |
| 7949277 | NM_015104    | ATG2A        | ATG2 autophagy related 2 homolog               | -0.063 | 0.957 | 5.29E-01 | 5.29E+01 |  |  |
| 7949320 | NM_130769    | GPHA2        | glycoprotein hormone alpha 2                   | 0.014  | 1.009 | 9.49E-01 | 9.49E+01 |  |  |
| 7949340 | NM_138456    | BATF2        | basic leucine zipper transcription factor 2    | -0.017 | 0.988 | 9.43E-01 | 9.43E+01 |  |  |
| 7949344 | NM_005468    | NAALADL1     | N-acetylated alpha-linked acidic dipeptidase 1 | 0.024  | 1.017 | 8.26E-01 | 8.26E+01 |  |  |
| 7949364 | NM_080668    | CDCA5        | cell division cycle associated 5               | 0.012  | 1.008 | 9.49E-01 | 9.49E+01 |  |  |
| 7949371 | AK124141     | LOC399904    | hypothetical LOC399904                         | -0.035 | 0.976 | 8.24E-01 | 8.24E+01 |  |  |
| 7949373 | NM_014205    | ZNHIT2       | zinc finger, HIT type 2                        | -0.113 | 0.924 | 3.66E-01 | 3.66E+01 |  |  |
| 7949377 | NM_001997    | FAU          | Finkel-Biskis-Reilly murine sarcoma            | 0.049  | 1.035 | 6.57E-01 | 6.57E+01 |  |  |
| 7949383 | NM_032431    | SYVN1        | synovial apoptosis inhibitor 1, synovial       | 0.093  | 1.066 | 2.68E-01 | 2.68E+01 |  |  |
| 7949410 | BC018448     | MALAT1       | metastasis associated lung adenocarcinoma      | 0.020  | 1.014 | 9.11E-01 | 9.11E+01 |  |  |
| 7949412 | NM_00113014  | LTBP3        | latent transforming growth factor binding      | -0.044 | 0.970 | 7.13E-01 | 7.13E+01 |  |  |
| 7949440 | NM_00109940  | EHBP1L1      | EH domain binding protein 1-like 1             | 0.020  | 1.014 | 9.02E-01 | 9.02E+01 |  |  |
| 7949444 | NM_005714    | KCNK7        | potassium channel, subfamily K, member 7       | -0.026 | 0.982 | 7.67E-01 | 7.67E+01 |  |  |
| 7949454 | NM_002419    | MAP3K11      | mitogen-activated protein kinase 11            | 0.057  | 1.040 | 5.49E-01 | 5.49E+01 |  |  |
| 7949465 | NM_021975    | RELA         | v-rel reticuloendotheliosis viral oncoprotein  | -0.114 | 0.924 | 1.25E-01 | 1.25E+01 |  |  |
| 7949482 | NM_032193    | RNASEH2C     | ribonuclease H2, subunit C                     | -0.013 | 0.991 | 9.61E-01 | 9.61E+01 |  |  |
| 7949490 | NM_138368    | DKFZp761E198 | DKFZp761E198 protein                           | -0.061 | 0.959 | 6.07E-01 | 6.07E+01 |  |  |
| 7949496 | NM_005507    | CFL1         | cofilin 1 (non-muscle)                         | 0.131  | 1.095 | 2.92E-01 | 2.92E+01 |  |  |
| 7949503 | NM_016938    | EFEMP2       | EGF-containing fibulin-like extracellular      | -0.060 | 0.960 | 5.91E-01 | 5.91E+01 |  |  |
| 7949518 | NM_198897    | FIBP         | fibroblast growth factor (acidic) interacting  | 0.000  | 1.000 | 1.00E+00 | 1.00E+02 |  |  |
| 7949532 | NM_005438    | FOSL1        | FOS-like antigen 1                             | -0.078 | 0.947 | 3.94E-01 | 3.94E+01 |  |  |
| 7949540 | NM_00113563  | C11orf68     | chromosome 11 open reading frame 68            | -0.120 | 0.920 | 3.03E-01 | 3.03E+01 |  |  |
| 7949545 | NM_032325    | EIF1AD       | eukaryotic translation initiation factor 1A    | 0.066  | 1.047 | 5.40E-01 | 5.40E+01 |  |  |
| 7949553 | NM_053054    | CATSPER1     | cation channel, sperm associated 1             | 0.047  | 1.033 | 6.00E-01 | 6.00E+01 |  |  |
| 7949568 | AK090761     | LOC100131232 | hypothetical LOC100131232                      | 0.005  | 1.004 | 9.82E-01 | 9.82E+01 |  |  |
| 7949570 | NM_033036    | GAL3ST3      | galactose-3-O-sulfotransferase 3               | 0.003  | 1.002 | 9.86E-01 | 9.86E+01 |  |  |
| 7949577 | NM_020470    | YIF1A        | Yip1 interacting factor homolog A              | 0.041  | 1.029 | 7.40E-01 | 7.40E+01 |  |  |
| 7949588 | NM_020404    | CD248        | CD248 molecule, endosialin                     | 0.026  | 1.018 | 9.24E-01 | 9.24E+01 |  |  |
| 7949592 | NM_004292    | RIN1         | Ras and Rab interactor 1                       | -0.003 | 0.998 | 9.86E-01 | 9.86E+01 |  |  |
| 7949603 | NM_015399    | BRMS1        | breast cancer metastasis suppressor 1          | -0.026 | 0.982 | 8.59E-01 | 8.59E+01 |  |  |
| 7949619 | NM_001532    | SLC29A2      | solute carrier family 29 (nucleoside)          | -0.017 | 0.988 | 8.92E-01 | 8.92E+01 |  |  |
| 7949637 | NM_170739    | MRPL11       | mitochondrial ribosomal protein L11            | -0.106 | 0.929 | 2.29E-01 | 2.29E+01 |  |  |
| 7949645 | NM_207340    | ZDHHC24      | zinc finger, DHHC-type containing 24           | -0.058 | 0.961 | 4.09E-01 | 4.09E+01 |  |  |
| 7949650 | NM_003793    | CTSF         | cathepsin F                                    | -0.058 | 0.961 | 4.42E-01 | 4.42E+01 |  |  |
| 7949674 | NM_031492    | RBM4B        | RNA binding motif protein 4B                   | -0.019 | 0.987 | 9.00E-01 | 9.00E+01 |  |  |
| 7949679 | NM_006946    | SPTBN2       | spectrin, beta, non-erythrocytic 2             | -0.028 | 0.981 | 7.77E-01 | 7.77E+01 |  |  |
| 7949717 | ---          | ---          | ---                                            | 0.008  | 1.005 | 9.65E-01 | 9.65E+01 |  |  |
| 7949744 | ---          | ---          | ---                                            | 0.039  | 1.027 | 9.42E-01 | 9.42E+01 |  |  |
| 7949746 | NM_021173    | POLD4        | polymerase (DNA-directed), delta               | 0.047  | 1.033 | 5.25E-01 | 5.25E+01 |  |  |
| 7949754 | NM_013246    | CLCF1        | cardiotrophin-like cytokine factor 1           | -0.061 | 0.958 | 3.79E-01 | 3.79E+01 |  |  |
| 7949765 | NM_00100870  | PPP1CA       | protein phosphatase 1, catalytic subunit       | 0.002  | 1.001 | 9.94E-01 | 9.94E+01 |  |  |
| 7949776 | NM_020441    | CORO1B       | coronin, actin binding protein, 1B             | 0.013  | 1.009 | 9.18E-01 | 9.18E+01 |  |  |
| 7949792 | NM_005608    | PTPRCAP      | protein tyrosine phosphatase, receptor         | 0.041  | 1.029 | 7.14E-01 | 7.14E+01 |  |  |
| 7949798 | NM_025124    | TMEM134      | transmembrane protein 134                      | -0.005 | 0.997 | 9.78E-01 | 9.78E+01 |  |  |
| 7949808 | NM_004910    | PITPNM1      | phosphatidylinositol transfer protein          | 0.001  | 1.001 | 9.97E-01 | 9.97E+01 |  |  |
| 7949836 | NM_005851    | CDK2AP2      | cyclin-dependent kinase 2 associated           | 0.031  | 1.021 | 8.50E-01 | 8.50E+01 |  |  |
| 7949843 | NM_016366    | CABP2        | calcium binding protein 2                      | -0.013 | 0.991 | 9.30E-01 | 9.30E+01 |  |  |
| 7949857 | NM_181843    | NUDT8        | nudix (nucleoside diphosphate linked)          | -0.012 | 0.991 | 9.46E-01 | 9.46E+01 |  |  |



|         |              |               |                                       |        |       |          |          |  |  |
|---------|--------------|---------------|---------------------------------------|--------|-------|----------|----------|--|--|
| 7949863 | NM_005995    | TBX10         | T-box 10                              | -0.026 | 0.982 | 8.30E-01 | 8.30E+01 |  |  |
| 7949873 | NM_080658    | ACY3          | aspartoacylase (aminocyclase) 3       | -0.045 | 0.970 | 6.16E-01 | 6.16E+01 |  |  |
| 7949882 | NM_000695    | ALDH3B2       | aldehyde dehydrogenase 3 family,      | -0.046 | 0.968 | 7.35E-01 | 7.35E+01 |  |  |
| 7949894 | ---          | ---           | ---                                   | 0.073  | 1.052 | 7.51E-01 | 7.51E+01 |  |  |
| 7949896 | ENST00000454 | // OR7E87P // | olfactory receptor, family 7, subfa   | 0.017  | 1.012 | 9.49E-01 | 9.49E+01 |  |  |
| 7949898 | ENST00000319 | LOC645332     | family with sequence similarity 86    | -0.072 | 0.951 | 6.38E-01 | 6.38E+01 |  |  |
| 7949904 | NM_030930    | UNC93B1       | unc-93 homolog B1 (C. elegans)        | 0.094  | 1.067 | 5.35E-01 | 5.35E+01 |  |  |
| 7949916 | NM_001277    | CHKA          | choline kinase alpha                  | 0.073  | 1.052 | 6.62E-01 | 6.62E+01 |  |  |
| 7949931 | NM_017635    | SUV420H1      | suppressor of variegation 4-20 ho     | -0.030 | 0.979 | 8.32E-01 | 8.32E+01 |  |  |
| 7949948 | NM_022338    | C11orf24      | chromosome 11 open reading fram       | 0.048  | 1.034 | 8.34E-01 | 8.34E+01 |  |  |
| 7949954 | ---          | ---           | ---                                   | -0.186 | 0.879 | 6.60E-01 | 6.60E+01 |  |  |
| 7949956 | NM_004923    | MTL5          | metallothionein-like 5, testis-spec   | -0.027 | 0.982 | 8.34E-01 | 8.34E+01 |  |  |
| 7949971 | NM_001876    | CPT1A         | carnitine palmitoyltransferase 1A     | 0.055  | 1.039 | 8.55E-01 | 8.55E+01 |  |  |
| 7949995 | NM_181515    | MRPL21        | mitochondrial ribosomal protein L     | 0.089  | 1.064 | 6.80E-01 | 6.80E+01 |  |  |
| 7950003 | NM_198923    | MRGPRD        | MAS-related GPR, member D             | -0.061 | 0.959 | 7.45E-01 | 7.45E+01 |  |  |
| 7950012 | NM_053056    | CCND1         | cyclin D1                             | -0.009 | 0.994 | 9.61E-01 | 9.61E+01 |  |  |
| 7950016 | NM_153451    | ORAQV1        | oral cancer overexpressed 1           | 0.086  | 1.062 | 5.67E-01 | 5.67E+01 |  |  |
| 7950023 | NM_005117    | FGF19         | fibroblast growth factor 19           | 0.004  | 1.002 | 9.85E-01 | 9.85E+01 |  |  |
| 7950032 | NM_002007    | FGF4          | fibroblast growth factor 4            | -0.004 | 0.997 | 9.74E-01 | 9.74E+01 |  |  |
| 7950036 | NM_005247    | FGF3          | fibroblast growth factor 3 (murine)   | -0.102 | 0.932 | 2.20E-01 | 2.20E+01 |  |  |
| 7950062 | ---          | ---           | ---                                   | 0.082  | 1.058 | 7.99E-01 | 7.99E+01 |  |  |
| 7950064 | ENST00000331 | FLJ42102      | FLJ42102 protein                      | -0.055 | 0.963 | 6.51E-01 | 6.51E+01 |  |  |
| 7950067 | NM_001360    | DHCR7         | 7-dehydrocholesterol reductase        | -0.103 | 0.931 | 5.95E-01 | 5.95E+01 |  |  |
| 7950078 | NM_00100540  | KRTAP5-11     | keratin associated protein 5-11       | -0.071 | 0.952 | 4.51E-01 | 4.51E+01 |  |  |
| 7950086 | NM_006185    | NUMA1         | nuclear mitotic apparatus protein     | -0.076 | 0.949 | 3.97E-01 | 3.97E+01 |  |  |
| 7950119 | BC001706     | C11orf59      | chromosome 11 open reading fram       | 0.109  | 1.078 | 2.09E-01 | 2.09E+01 |  |  |
| 7950128 | NM_014042    | C11orf51      | chromosome 11 open reading fram       | 0.039  | 1.027 | 8.05E-01 | 8.05E+01 |  |  |
| 7950136 | NM_005169    | PHOX2A        | paired-like homeobox 2a               | -0.019 | 0.987 | 8.95E-01 | 8.95E+01 |  |  |
| 7950140 | AF229166     | LOC220077     | docking protein 1-like protein        | 0.018  | 1.013 | 8.90E-01 | 8.90E+01 |  |  |
| 7950142 | NM_030813    | CLPB          | ClpB caseinolytic peptidase B hom     | -0.093 | 0.937 | 3.35E-01 | 3.35E+01 |  |  |
| 7950195 | ---          | ---           | ---                                   | -0.058 | 0.961 | 5.73E-01 | 5.73E+01 |  |  |
| 7950197 | NM_015242    | ARAP1         | ArfGAP with RhoGAP domain, ank        | 0.022  | 1.015 | 9.16E-01 | 9.16E+01 |  |  |
| 7950235 | NM_006645    | STARD10       | StAR-related lipid transfer (START    | -0.120 | 0.920 | 3.98E-01 | 3.98E+01 |  |  |
| 7950248 | NM_014824    | FCHSD2        | FCH and double SH3 domains 2          | 0.228  | 1.171 | 2.91E-03 | 2.91E-01 |  |  |
| 7950269 | ---          | ---           | ---                                   | 0.233  | 1.175 | 4.16E-01 | 4.16E+01 |  |  |
| 7950271 | EF363480     | FAM168A       | family with sequence similarity 16    | -0.006 | 0.996 | 9.77E-01 | 9.77E+01 |  |  |
| 7950282 | ---          | ---           | ---                                   | -0.049 | 0.967 | 9.09E-01 | 9.09E+01 |  |  |
| 7950284 | NM_002869    | RAB6A         | RAB6A, member RAS oncogene fa         | -0.016 | 0.989 | 9.22E-01 | 9.22E+01 |  |  |
| 7950294 | NM_016565    | CHCHD8        | coiled-coil-helix-coiled-coil-helix d | -0.024 | 0.983 | 8.89E-01 | 8.89E+01 |  |  |
| 7950299 | NM_153614    | DNAJB13       | DnaJ (Hsp40) related, subfamily B,    | -0.003 | 0.998 | 9.86E-01 | 9.86E+01 |  |  |
| 7950307 | NM_003355    | UCP2          | uncoupling protein 2 (mitochondr      | 0.362  | 1.285 | 6.22E-02 | 6.22E+00 |  |  |
| 7950321 | NM_003356    | UCP3          | uncoupling protein 3 (mitochondr      | -0.030 | 0.980 | 8.49E-01 | 8.49E+01 |  |  |
| 7950332 | BC035599     | C2CD3         | C2 calcium-dependent domain coi       | 0.117  | 1.084 | 4.44E-01 | 4.44E+01 |  |  |
| 7950336 | NM_015531    | C2CD3         | C2 calcium-dependent domain coi       | -0.090 | 0.940 | 4.27E-01 | 4.27E+01 |  |  |
| 7950370 | ---          | ---           | ---                                   | -0.053 | 0.964 | 8.58E-01 | 8.58E+01 |  |  |
| 7950372 | ---          | ---           | ---                                   | 0.120  | 1.087 | 6.57E-01 | 6.57E+01 |  |  |
| 7950374 | NM_182904    | P4HA3         | prolyl 4-hydroxylase, alpha polype    | 0.003  | 1.002 | 9.88E-01 | 9.88E+01 |  |  |
| 7950391 | NM_173582    | PGM2L1        | phosphoglucomutase 2-like 1           | -0.151 | 0.900 | 2.40E-01 | 2.40E+01 |  |  |
| 7950409 | NM_005472    | KCNE3         | potassium voltage-gated channel,      | 0.129  | 1.093 | 4.43E-01 | 4.43E+01 |  |  |
| 7950420 | NM_00114486  | LOC387787     | lipoyl(octanoyl) transferase          | 0.007  | 1.005 | 9.78E-01 | 9.78E+01 |  |  |
| 7950423 | ---          | ---           | ---                                   | 0.056  | 1.040 | 8.21E-01 | 8.21E+01 |  |  |
| 7950425 | NM_015424    | CHRD12        | chordin-like 2                        | -0.069 | 0.953 | 3.91E-01 | 3.91E+01 |  |  |
| 7950442 | ---          | ---           | ---                                   | -0.101 | 0.933 | 4.05E-01 | 4.05E+01 |  |  |
| 7950444 | ---          | ---           | ---                                   | -0.075 | 0.949 | 7.01E-01 | 7.01E+01 |  |  |
| 7950447 | NM_182969    | XRRA1         | X-ray radiation resistance associat   | 0.025  | 1.018 | 9.04E-01 | 9.04E+01 |  |  |
| 7950469 | ---          | ---           | ---                                   | 0.114  | 1.082 | 5.07E-01 | 5.07E+01 |  |  |
| 7950471 | NM_00100528  | OR2AT4        | olfactory receptor, family 2, subfa   | -0.003 | 0.998 | 9.88E-01 | 9.88E+01 |  |  |
| 7950490 | ---          | ---           | ---                                   | -0.060 | 0.959 | 6.25E-01 | 6.25E+01 |  |  |
| 7950492 | NM_00103954  | KLHL35        | kelch-like 35 (Drosophila)            | -0.031 | 0.978 | 7.43E-01 | 7.43E+01 |  |  |
| 7950501 | NM_030792    | GDPD5         | glycerophosphodiester phosphodi       | -0.049 | 0.967 | 6.62E-01 | 6.62E+01 |  |  |
| 7950534 | NM_004626    | WNT11         | wingless-type MMTV integration s      | -0.097 | 0.935 | 3.40E-01 | 3.40E+01 |  |  |
| 7950544 | NM_004705    | PRKRIR        | protein-kinase, interferon-inducib    | 0.030  | 1.021 | 8.62E-01 | 8.62E+01 |  |  |
| 7950555 | NM_00112892  | LRRC32        | leucine rich repeat containing 32     | 0.072  | 1.051 | 4.97E-01 | 4.97E+01 |  |  |
| 7950597 | NM_001293    | CLNS1A        | chloride channel, nucleotide-sensi    | 0.008  | 1.005 | 9.77E-01 | 9.77E+01 |  |  |
| 7950606 | NM_016578    | RSF1          | remodeling and spacing factor 1       | -0.107 | 0.928 | 1.59E-01 | 1.59E+01 |  |  |
| 7950626 | BC071734     | RPS20P27      | ribosomal protein S20 pseudogen       | 0.041  | 1.029 | 8.15E-01 | 8.15E+01 |  |  |
| 7950628 | NM_033547    | INTS4         | integrator complex subunit 4          | -0.024 | 0.984 | 9.27E-01 | 9.27E+01 |  |  |
| 7950641 | NM_023930    | KCTD14        | potassium channel tetramerisatio      | 0.063  | 1.045 | 6.76E-01 | 6.76E+01 |  |  |
| 7950644 | NM_004549    | NDUFC2        | NADH dehydrogenase (ubiquinone        | -0.004 | 0.997 | 9.86E-01 | 9.86E+01 |  |  |
| 7950654 | NM_024079    | ALG8          | asparagine-linked glycosylation 8,    | 0.060  | 1.042 | 8.28E-01 | 8.28E+01 |  |  |
| 7950669 | NM_00102985  | KCTD21        | potassium channel tetramerisatio      | -0.138 | 0.909 | 1.61E-01 | 1.61E+01 |  |  |
| 7950671 | NM_080491    | GAB2          | GRB2-associated binding protein 2     | -0.207 | 0.866 | 1.20E-01 | 1.20E+01 |  |  |
| 7950701 | NM_00109881  | ODZ4          | odz, odd Oz/ten-m homolog 4 (Dro      | -0.018 | 0.988 | 8.73E-01 | 8.73E+01 |  |  |
| 7950726 | NM_175885    | FAM181B       | family with sequence similarity 18    | -0.081 | 0.946 | 3.75E-01 | 3.75E+01 |  |  |
| 7950743 | NM_014488    | RAB30         | RAB30, member RAS oncogene fa         | 0.217  | 1.162 | 1.64E-01 | 1.64E+01 |  |  |
| 7950751 | ---          | ---           | ---                                   | 0.178  | 1.131 | 5.89E-01 | 5.89E+01 |  |  |
| 7950753 | NM_021825    | CCDC90B       | coiled-coil domain containing 90B     | -0.006 | 0.996 | 9.83E-01 | 9.83E+01 |  |  |

|         |              |          |                                     |        |       |          |          |  |  |
|---------|--------------|----------|-------------------------------------|--------|-------|----------|----------|--|--|
| 7950762 | ---          | ---      | ---                                 | -0.075 | 0.950 | 6.37E-01 | 6.37E+01 |  |  |
| 7950796 | NM_00103961  | CREBZF   | CREB/ATF bZIP transcription facto   | -0.026 | 0.982 | 8.63E-01 | 8.63E+01 |  |  |
| 7950810 | NM_206927    | SYTL2    | synaptotagmin-like 2                | -0.025 | 0.983 | 9.53E-01 | 9.53E+01 |  |  |
| 7950838 | NM_007166    | PICALM   | phosphatidylinositol binding clath  | 0.161  | 1.118 | 1.92E-01 | 1.92E+01 |  |  |
| 7950862 | ---          | ---      | ---                                 | 0.071  | 1.051 | 8.86E-01 | 8.86E+01 |  |  |
| 7950864 | NM_00101481  | ME3      | malic enzyme 3, NADP(+)-depende     | -0.016 | 0.989 | 9.00E-01 | 9.00E+01 |  |  |
| 7950885 | NM_012193    | FZD4     | frizzled homolog 4 (Drosophila)     | -0.001 | 1.000 | 9.97E-01 | 9.97E+01 |  |  |
| 7950899 | NM_022337    | RAB38    | RAB38, member RAS oncogene fa       | -0.066 | 0.955 | 6.80E-01 | 6.80E+01 |  |  |
| 7950921 | NM_00114383  | GRM5     | glutamate receptor, metabotropic    | -0.046 | 0.969 | 6.59E-01 | 6.59E+01 |  |  |
| 7950983 | NM_012124    | CHORDC1  | cysteine and histidine-rich domain  | -0.080 | 0.946 | 6.08E-01 | 6.08E+01 |  |  |
| 7950990 | NM_152313    | SLC36A4  | solute carrier family 36 (proton/ar | 0.007  | 1.005 | 9.84E-01 | 9.84E+01 |  |  |
| 7951008 | NM_024116    | TAF1D    | TATA box binding protein (TBP)-as   | -0.037 | 0.975 | 8.24E-01 | 8.24E+01 |  |  |
| 7951030 | NR_003036    | SNORD6   | small nucleolar RNA, C/D box 6      | 0.021  | 1.015 | 9.61E-01 | 9.61E+01 |  |  |
| 7951032 | NR_003026    | SNORA1   | small nucleolar RNA, H/ACA box 1    | 0.000  | 1.000 | 1.00E+00 | 1.00E+02 |  |  |
| 7951034 | NR_002920    | SNORA8   | small nucleolar RNA, H/ACA box 8    | 0.190  | 1.141 | 2.26E-01 | 2.26E+01 |  |  |
| 7951036 | NR_003033    | SNORD5   | small nucleolar RNA, C/D box 5      | 0.054  | 1.038 | 8.18E-01 | 8.18E+01 |  |  |
| 7951038 | NR_002973    | SNORA40  | small nucleolar RNA, H/ACA box 4    | 0.018  | 1.013 | 9.76E-01 | 9.76E+01 |  |  |
| 7951040 | NM_016540    | GPR83    | G protein-coupled receptor 83       | -0.094 | 0.937 | 3.02E-01 | 3.02E+01 |  |  |
| 7951046 | NM_005591    | MRE11A   | MRE11 meiotic recombination 11      | -0.019 | 0.987 | 9.36E-01 | 9.36E+01 |  |  |
| 7951068 | NM_016403    | CWC15    | CWC15 spliceosome-associated pr     | -0.038 | 0.974 | 8.40E-01 | 8.40E+01 |  |  |
| 7951077 | NM_144665    | SESN3    | sestrin 3                           | -0.040 | 0.973 | 9.00E-01 | 9.00E+01 |  |  |
| 7951089 | ---          | ---      | ---                                 | -0.023 | 0.984 | 9.16E-01 | 9.16E+01 |  |  |
| 7951091 | ---          | ---      | ---                                 | 0.021  | 1.015 | 9.68E-01 | 9.68E+01 |  |  |
| 7951093 | NM_144664    | FAM76B   | family with sequence similarity 76  | -0.029 | 0.980 | 8.44E-01 | 8.44E+01 |  |  |
| 7951108 | ---          | ---      | ---                                 | -0.022 | 0.985 | 9.44E-01 | 9.44E+01 |  |  |
| 7951112 | NR_023356    | MTMR2    | myotubularin related protein 2      | -0.046 | 0.969 | 8.37E-01 | 8.37E+01 |  |  |
| 7951131 | ---          | ---      | ---                                 | 0.106  | 1.076 | 7.27E-01 | 7.27E+01 |  |  |
| 7951133 | NM_032427    | MAML2    | mastermind-like 2 (Drosophila)      | 0.009  | 1.006 | 9.68E-01 | 9.68E+01 |  |  |
| 7951140 | AY358248     | UNQ6228  | hypothetical LOC100131541           | 0.134  | 1.097 | 5.53E-01 | 5.53E+01 |  |  |
| 7951144 | NM_024725    | CCDC82   | coiled-coil domain containing 82    | -0.103 | 0.931 | 2.25E-01 | 2.25E+01 |  |  |
| 7951157 | AK313893     | CCDC82   | coiled-coil domain containing 82    | -0.092 | 0.938 | 7.01E-01 | 7.01E+01 |  |  |
| 7951159 | ---          | ---      | ---                                 | -0.026 | 0.982 | 9.44E-01 | 9.44E+01 |  |  |
| 7951207 | NM_052932    | TMEM123  | transmembrane protein 123           | 0.003  | 1.002 | 9.89E-01 | 9.89E+01 |  |  |
| 7951325 | NM_032299    | DCUN1D5  | DCN1, defective in cullin neddylat  | -0.027 | 0.981 | 9.06E-01 | 9.06E+01 |  |  |
| 7951372 | NM_033306    | CASP4    | caspase 4, apoptosis-related cyste  | 0.099  | 1.071 | 7.08E-01 | 7.08E+01 |  |  |
| 7951397 | NM_033292    | CASP1    | caspase 1, apoptosis-related cyste  | 0.221  | 1.166 | 4.96E-01 | 4.96E+01 |  |  |
| 7951408 | NM_052889    | CARD16   | caspase recruitment domain fami     | 0.084  | 1.060 | 7.89E-01 | 7.89E+01 |  |  |
| 7951422 | NM_032424    | KIAA1826 | KIAA1826                            | 0.034  | 1.024 | 8.43E-01 | 8.43E+01 |  |  |
| 7951435 | ---          | ---      | ---                                 | 0.053  | 1.037 | 7.94E-01 | 7.94E+01 |  |  |
| 7951447 | NM_152434    | CWF19L2  | CWF19-like 2, cell cycle control (S | -0.059 | 0.960 | 6.39E-01 | 6.39E+01 |  |  |
| 7951485 | NM_017515    | SLC35F2  | solute carrier family 35, member F  | -0.060 | 0.960 | 7.78E-01 | 7.78E+01 |  |  |
| 7951497 | NM_002519    | NPAT     | nuclear protein, ataxia-telangiecta | -0.037 | 0.975 | 8.79E-01 | 8.79E+01 |  |  |
| 7951535 | NM_153705    | KDEL2    | KDEL (Lys-Asp-Glu-Leu) containi     | 0.182  | 1.134 | 1.35E-01 | 1.35E+01 |  |  |
| 7951554 | NM_002906    | RDX      | radixin                             | -0.077 | 0.948 | 8.05E-01 | 8.05E+01 |  |  |
| 7951589 | ---          | ---      | ---                                 | -0.012 | 0.992 | 9.65E-01 | 9.65E+01 |  |  |
| 7951596 | NM_006235    | POU2AF1  | POU class 2 associating factor 1    | 0.154  | 1.113 | 3.33E-02 | 3.33E+00 |  |  |
| 7951612 | AK293317     | LAYN     | layilin                             | -0.043 | 0.971 | 7.15E-01 | 7.15E+01 |  |  |
| 7951614 | NM_002716    | PPP2R1B  | protein phosphatase 2 (formerly 2   | -0.006 | 0.996 | 9.74E-01 | 9.74E+01 |  |  |
| 7951633 | NM_024740    | ALG9     | asparagine-linked glycosylation 9,  | -0.086 | 0.942 | 5.72E-01 | 5.72E+01 |  |  |
| 7951660 | ENST00000317 | RPL37AP8 | ribosomal protein L37a pseudoge     | -0.042 | 0.971 | 7.35E-01 | 7.35E+01 |  |  |
| 7951668 | ---          | ---      | ---                                 | -0.053 | 0.964 | 9.10E-01 | 9.10E+01 |  |  |
| 7951679 | NM_012459    | TIMM88   | translocase of inner mitochondrial  | 0.012  | 1.009 | 9.64E-01 | 9.64E+01 |  |  |
| 7951695 | NM_00114502  | C11orf34 | chromosome 11 open reading fra      | 0.138  | 1.101 | 6.06E-01 | 6.06E+01 |  |  |
| 7951701 | ---          | ---      | ---                                 | 0.066  | 1.047 | 8.62E-01 | 8.62E+01 |  |  |
| 7951703 | NM_000795    | DRD2     | dopamine receptor D2                | -0.081 | 0.945 | 1.68E-01 | 1.68E+01 |  |  |
| 7951734 | NM_004724    | ZW10     | ZW10, kinetochore associated, ho    | 0.042  | 1.029 | 8.53E-01 | 8.53E+01 |  |  |
| 7951752 | NM_020886    | USP28    | ubiquitin specific peptidase 28     | 0.235  | 1.177 | 1.56E-01 | 1.56E+01 |  |  |
| 7951781 | BC071695     | C11orf71 | chromosome 11 open reading fra      | 0.058  | 1.041 | 6.71E-01 | 6.71E+01 |  |  |
| 7951807 | NM_014333    | CADM1    | cell adhesion molecule 1            | -0.053 | 0.964 | 9.27E-01 | 9.27E+01 |  |  |
| 7951824 | ---          | ---      | ---                                 | 0.026  | 1.018 | 8.95E-01 | 8.95E+01 |  |  |
| 7951826 | NM_032725    | BUD13    | BUD13 homolog (S. cerevisiae)       | 0.033  | 1.023 | 8.09E-01 | 8.09E+01 |  |  |
| 7951838 | NM_003904    | ZNF259   | zinc finger protein 259             | 0.027  | 1.019 | 9.00E-01 | 9.00E+01 |  |  |
| 7951853 | NM_052968    | APOA5    | apolipoprotein A-V                  | 0.040  | 1.028 | 7.01E-01 | 7.01E+01 |  |  |
| 7951859 | NM_000482    | APOA4    | apolipoprotein A-IV                 | -0.002 | 0.999 | 9.86E-01 | 9.86E+01 |  |  |
| 7951865 | NM_000039    | APOA1    | apolipoprotein A-I                  | 0.029  | 1.021 | 6.97E-01 | 6.97E+01 |  |  |
| 7951873 | NM_025164    | QSK      | serine/threonine-protein kinase Q   | -0.076 | 0.949 | 5.18E-01 | 5.18E+01 |  |  |
| 7951896 | NM_004716    | PCSK7    | proprotein convertase subtilisin/k  | -0.091 | 0.939 | 5.23E-01 | 5.23E+01 |  |  |
| 7951910 | NM_012104    | BACE1    | beta-site APP-cleaving enzyme 1     | 0.016  | 1.011 | 9.25E-01 | 9.25E+01 |  |  |
| 7951928 | NM_020693    | DSCAML1  | Down syndrome cell adhesion mo      | -0.007 | 0.995 | 9.64E-01 | 9.64E+01 |  |  |
| 7951966 | NM_00112748  | FXD2     | FXD domain containing ion trans     | -0.018 | 0.987 | 8.62E-01 | 8.62E+01 |  |  |
| 7951977 | NM_022003    | FXD6     | FXD domain containing ion trans     | 0.010  | 1.007 | 9.60E-01 | 9.60E+01 |  |  |
| 7951987 | NM_00107726  | TMPPRS13 | transmembrane protease, serine 1    | 0.028  | 1.020 | 8.95E-01 | 8.95E+01 |  |  |
| 7952004 | NM_174934    | SCN4B    | sodium channel, voltage-gated, ty   | -0.005 | 0.996 | 9.79E-01 | 9.79E+01 |  |  |
| 7952011 | NM_004588    | SCN2B    | sodium channel, voltage-gated, ty   | 0.011  | 1.008 | 9.49E-01 | 9.49E+01 |  |  |
| 7952022 | NM_00109852  | AMICA1   | adhesion molecule, interacts with   | -0.319 | 0.801 | 3.11E-02 | 3.11E+00 |  |  |
| 7952036 | NM_198275    | MPZL3    | myelin protein zero-like 3          | -0.268 | 0.830 | 5.65E-02 | 5.65E+00 |  |  |
| 7952056 | NM_000732    | CD3D     | CD3d molecule, delta (CD3-TCR co    | -0.207 | 0.867 | 3.88E-02 | 3.88E+00 |  |  |

|         |              |              |                                     |        |       |          |          |  |  |
|---------|--------------|--------------|-------------------------------------|--------|-------|----------|----------|--|--|
| 7952069 | NM_020153    | C11orf60     | chromosome 11 open reading fram     | -0.017 | 0.989 | 9.64E-01 | 9.64E+01 |  |  |
| 7952086 | NM_007180    | TREH         | trehalase (brush-border membran     | 0.049  | 1.035 | 6.53E-01 | 6.53E+01 |  |  |
| 7952103 | NM_004397    | DDX6         | DEAD (Asp-Glu-Ala-Asp) box polyp    | -0.045 | 0.969 | 5.53E-01 | 5.53E+01 |  |  |
| 7952116 | NM_182557    | BCL9L        | B-cell CLL/lymphoma 9-like          | -0.079 | 0.946 | 3.62E-01 | 3.62E+01 |  |  |
| 7952126 | NR_003040    | RPL23AP64    | ribosomal protein L23a pseudogen    | 0.016  | 1.011 | 9.38E-01 | 9.38E+01 |  |  |
| 7952129 | NM_001028    | RPS25        | ribosomal protein S25               | -0.014 | 0.990 | 9.40E-01 | 9.40E+01 |  |  |
| 7952132 | NM_001467    | SLC37A4      | solute carrier family 37 (glucose-6 | -0.013 | 0.991 | 9.34E-01 | 9.34E+01 |  |  |
| 7952145 | NM_006389    | HYOU1        | hypoxia up-regulated 1              | 0.112  | 1.081 | 4.63E-01 | 4.63E+01 |  |  |
| 7952179 | NM_002105    | H2AFX        | H2A histone family, member X        | -0.132 | 0.912 | 6.89E-02 | 6.89E+00 |  |  |
| 7952185 | NM_001382    | DPAGT1       | dolichyl-phosphate (UDP-N-acetyl    | 0.120  | 1.086 | 2.11E-01 | 2.11E+01 |  |  |
| 7952200 | NM_00114501  | CCDC153      | coiled-coil domain containing 153   | 0.048  | 1.033 | 7.45E-01 | 7.45E+01 |  |  |
| 7952205 | NM_006500    | MCAM         | melanoma cell adhesion molecule     | -0.035 | 0.976 | 7.51E-01 | 7.51E+01 |  |  |
| 7952227 | NM_015645    | C1QTNF5      | C1q and tumor necrosis factor rela  | -0.025 | 0.983 | 8.18E-01 | 8.18E+01 |  |  |
| 7952243 | NM_015645    | C1QTNF5      | C1q and tumor necrosis factor rela  | -0.002 | 0.999 | 9.90E-01 | 9.90E+01 |  |  |
| 7952268 | NM_006288    | THY1         | Thy-1 cell surface antigen          | 0.024  | 1.017 | 8.62E-01 | 8.62E+01 |  |  |
| 7952290 | NM_012101    | TRIM29       | tripartite motif-containing 29      | 0.008  | 1.006 | 9.63E-01 | 9.63E+01 |  |  |
| 7952321 | NM_00109816  | BSX          | brain-specific homeobox             | 0.055  | 1.039 | 4.88E-01 | 4.88E+01 |  |  |
| 7952325 | NM_006597    | HSPA8        | heat shock 70kDa protein 8          | -0.008 | 0.994 | 9.61E-01 | 9.61E+01 |  |  |
| 7952335 | NR_003125    | SNORD14E     | small nucleolar RNA, C/D box 14E    | -0.090 | 0.939 | 8.42E-01 | 8.42E+01 |  |  |
| 7952339 | NR_001453    | SNORD14C     | small nucleolar RNA, C/D box 14C    | -0.088 | 0.941 | 7.90E-01 | 7.90E+01 |  |  |
| 7952341 | NM_024769    | ASAM         | adipocyte-specific adhesion molec   | 0.009  | 1.006 | 9.73E-01 | 9.73E+01 |  |  |
| 7952350 | NM_018400    | SCN3B        | sodium channel, voltage-gated, ty   | -0.062 | 0.958 | 6.35E-01 | 6.35E+01 |  |  |
| 7952361 | NM_003455    | ZNF202       | zinc finger protein 202             | -0.087 | 0.942 | 3.79E-01 | 3.79E+01 |  |  |
| 7952384 | NM_00100447  | OR10S1       | olfactory receptor, family 10, subf | -0.065 | 0.956 | 7.09E-01 | 7.09E+01 |  |  |
| 7952386 | ENST00000307 | OR10G6       | olfactory receptor, family 10, subf | -0.049 | 0.967 | 6.52E-01 | 6.52E+01 |  |  |
| 7952388 | NM_00100446  | OR10G7       | olfactory receptor, family 10, subf | 0.066  | 1.047 | 6.71E-01 | 6.71E+01 |  |  |
| 7952394 | NM_00100291  | OR8D2        | olfactory receptor, family 8, subfa | 0.010  | 1.007 | 9.66E-01 | 9.66E+01 |  |  |
| 7952408 | NM_170601    | SIAE         | sialic acid acetyltransferase       | 0.090  | 1.065 | 5.71E-01 | 5.71E+01 |  |  |
| 7952426 | NM_014312    | VSIG2        | V-set and immunoglobulin domain     | 0.009  | 1.006 | 9.54E-01 | 9.54E+01 |  |  |
| 7952436 | NM_138961    | ESAM         | endothelial cell adhesion molecule  | -0.040 | 0.972 | 7.14E-01 | 7.14E+01 |  |  |
| 7952445 | NM_024631    | C11orf61     | chromosome 11 open reading fram     | -0.089 | 0.940 | 5.40E-01 | 5.40E+01 |  |  |
| 7952453 | NM_019055    | ROBO4        | roundabout homolog 4, magic rou     | -0.128 | 0.915 | 6.65E-02 | 6.65E+00 |  |  |
| 7952475 | NM_152722    | HEPACAM      | hepatocyte cell adhesion molecule   | -0.006 | 0.996 | 9.76E-01 | 9.76E+01 |  |  |
| 7952484 | NM_00108054  | TMEM218      | transmembrane protein 218           | 0.002  | 1.002 | 9.95E-01 | 9.95E+01 |  |  |
| 7952488 | ---          | ---          | ---                                 | 0.022  | 1.015 | 8.86E-01 | 8.86E+01 |  |  |
| 7952549 | NM_032795    | RPUSD4       | RNA pseudouridylyl synthase do      | 0.076  | 1.054 | 6.28E-01 | 6.28E+01 |  |  |
| 7952557 | NM_003139    | SRPR         | signal recognition particle recepto | -0.022 | 0.985 | 8.97E-01 | 8.97E+01 |  |  |
| 7952577 | NM_032531    | KIRREL3      | kin of IRRE like 3 (Drosophila)     | -0.040 | 0.972 | 7.91E-01 | 7.91E+01 |  |  |
| 7952601 | NM_00114382  | ETS1         | v-ets erythroblastosis virus E26 on | -0.011 | 0.993 | 9.62E-01 | 9.62E+01 |  |  |
| 7952641 | NM_00114268  | RICS         | Rho GTPase-activating protein       | -0.017 | 0.989 | 9.44E-01 | 9.44E+01 |  |  |
| 7952671 | ---          | ---          | ---                                 | 0.044  | 1.031 | 7.89E-01 | 7.89E+01 |  |  |
| 7952677 | NM_006165    | NFRKB        | nuclear factor related to kappaB b  | -0.042 | 0.971 | 7.30E-01 | 7.30E+01 |  |  |
| 7952707 | NM_020228    | PRDM10       | PR domain containing 10             | -0.069 | 0.953 | 4.54E-01 | 4.54E+01 |  |  |
| 7952733 | ---          | ---          | ---                                 | 0.003  | 1.002 | 9.88E-01 | 9.88E+01 |  |  |
| 7952737 | ---          | ---          | ---                                 | 0.193  | 1.143 | 4.97E-01 | 4.97E+01 |  |  |
| 7952739 | NM_014155    | ZBTB44       | zinc finger and BTB domain contai   | 0.008  | 1.006 | 9.74E-01 | 9.74E+01 |  |  |
| 7952752 | NM_007037    | ADAMTS8      | ADAM metalloproteinase with thro    | 0.015  | 1.011 | 9.15E-01 | 9.15E+01 |  |  |
| 7952766 | ---          | ---          | ---                                 | -0.080 | 0.946 | 2.65E-01 | 2.65E+01 |  |  |
| 7952768 | NM_014758    | SNX19        | sorting nexin 19                    | 0.038  | 1.027 | 7.94E-01 | 7.94E+01 |  |  |
| 7952795 | ---          | ---          | ---                                 | -0.036 | 0.975 | 7.94E-01 | 7.94E+01 |  |  |
| 7952805 | NR_024344    | LOC283174    | hypothetical LOC283174              | -0.167 | 0.891 | 3.67E-01 | 3.67E+01 |  |  |
| 7952813 | NM_014987    | IGSF9B       | immunoglobulin superfamily, mem     | -0.040 | 0.973 | 7.51E-01 | 7.51E+01 |  |  |
| 7952830 | NM_015261    | NCAPD3       | non-SMC condensin II complex, su    | -0.035 | 0.976 | 8.90E-01 | 8.90E+01 |  |  |
| 7952869 | NM_014174    | THYN1        | thymocyte nuclear protein 1         | -0.098 | 0.934 | 3.90E-01 | 3.90E+01 |  |  |
| 7952884 | NM_054025    | B3GAT1       | beta-1,3-glucuronyltransferase 1 (  | -0.017 | 0.988 | 9.27E-01 | 9.27E+01 |  |  |
| 7952893 | BC024764     | IQSEC3       | IQ motif and Sec7 domain 3          | -0.050 | 0.966 | 4.35E-01 | 4.35E+01 |  |  |
| 7952897 | NM_015232    | IQSEC3       | IQ motif and Sec7 domain 3          | -0.022 | 0.985 | 8.31E-01 | 8.31E+01 |  |  |
| 7952914 | NM_032358    | CCDC77       | coiled-coil domain containing 77    | -0.006 | 0.996 | 9.86E-01 | 9.86E+01 |  |  |
| 7952927 | NM_173593    | B4GALNT3     | beta-1,4-N-acetyl-galactosaminyl t  | -0.055 | 0.963 | 6.38E-01 | 6.38E+01 |  |  |
| 7952950 | ENST00000318 | LOC100049716 | hypothetical protein LOC1000497     | 0.162  | 1.119 | 3.60E-01 | 3.60E+01 |  |  |
| 7952953 | NM_018979    | WNK1         | WNK lysine deficient protein kinas  | 0.006  | 1.004 | 9.74E-01 | 9.74E+01 |  |  |
| 7952984 | ---          | ---          | ---                                 | 0.011  | 1.008 | 9.82E-01 | 9.82E+01 |  |  |
| 7952986 | NM_213655    | HSN2         | hereditary sensory neuropathy, ty   | -0.011 | 0.992 | 9.76E-01 | 9.76E+01 |  |  |
| 7952988 | NR_027948    | ERC1         | ELKS/RAB6-interacting/CAST famil    | -0.164 | 0.892 | 2.17E-02 | 2.17E+00 |  |  |
| 7953021 | NM_024551    | ADIPOR2      | adiponectin receptor 2              | 0.062  | 1.044 | 5.83E-01 | 5.83E+01 |  |  |
| 7953032 | NM_00103902  | LRTM2        | leucine-rich repeats and transmem   | 0.029  | 1.020 | 8.52E-01 | 8.52E+01 |  |  |
| 7953100 | NM_002014    | FKBP4        | FK506 binding protein 4, 59kDa      | -0.226 | 0.855 | 9.22E-02 | 9.22E+00 |  |  |
| 7953111 | NM_018463    | ITFG2        | integrin alpha FG-GAP repeat cont   | 0.047  | 1.033 | 7.52E-01 | 7.52E+01 |  |  |
| 7953130 | NR_027363    | C12orf32     | chromosome 12 open reading fram     | 0.112  | 1.081 | 2.68E-01 | 2.68E+01 |  |  |
| 7953135 | NM_003324    | TULP3        | tubby like protein 3                | -0.155 | 0.898 | 1.67E-01 | 1.67E+01 |  |  |
| 7953150 | NM_003213    | TEAD4        | TEA domain family member 4          | -0.031 | 0.978 | 7.51E-01 | 7.51E+01 |  |  |
| 7953166 | NM_006675    | TSPAN9       | tetraspanin 9                       | -0.097 | 0.935 | 2.63E-01 | 2.63E+01 |  |  |
| 7953200 | NM_001759    | CCND2        | cyclin D2                           | -0.060 | 0.959 | 6.88E-01 | 6.88E+01 |  |  |
| 7953243 | NM_005002    | NDUFA9       | NADH dehydrogenase (ubiquinone      | 0.076  | 1.054 | 5.11E-01 | 5.11E+01 |  |  |
| 7953264 | NM_002235    | KCNA6        | potassium voltage-gated channel,    | -0.163 | 0.893 | 7.05E-02 | 7.05E+00 |  |  |
| 7953274 | NM_000217    | KCNA1        | potassium voltage-gated channel,    | -0.081 | 0.945 | 2.66E-01 | 2.66E+01 |  |  |
| 7953303 | NM_018173    | PLEKHG6      | pleckstrin homology domain conta    | 0.023  | 1.016 | 8.54E-01 | 8.54E+01 |  |  |

|         |             |              |                                                        |        |       |          |          |  |  |
|---------|-------------|--------------|--------------------------------------------------------|--------|-------|----------|----------|--|--|
| 7953321 | NM_002342   | LTBR         | lymphotoxin beta receptor (TNFR                        | 0.106  | 1.076 | 1.61E-01 | 1.61E+01 |  |  |
| 7953333 | NM_001242   | CD27         | CD27 molecule                                          | 0.011  | 1.008 | 9.69E-01 | 9.69E+01 |  |  |
| 7953341 | NM_018009   | TAPBP1       | TAP binding protein-like                               | -0.021 | 0.986 | 8.99E-01 | 8.99E+01 |  |  |
| 7953351 | NM_014865   | NCAPD2       | non-SMC condensin I complex, subunit 2                 | 0.000  | 1.000 | 1.00E+00 | 1.00E+02 |  |  |
| 7953383 | NR_004387   | SCARNA10     | small Cajal body-specific RNA 10                       | -0.368 | 0.775 | 8.78E-02 | 8.78E+00 |  |  |
| 7953385 | NM_002046   | GAPDH        | glyceraldehyde-3-phosphate dehydrogenase               | -0.201 | 0.870 | 5.59E-02 | 5.59E+00 |  |  |
| 7953390 | NM_00103991 | ZNF384       | zinc finger protein 384                                | -0.062 | 0.958 | 5.97E-01 | 5.97E+01 |  |  |
| 7953395 | NM_016319   | COPS7A       | COP9 constitutive photomorphogenesis 7A                | -0.002 | 0.998 | 9.92E-01 | 9.92E+01 |  |  |
| 7953409 | NM_002824   | PTMS         | parathyroid hormone-related protein                    | 0.054  | 1.038 | 8.03E-01 | 8.03E+01 |  |  |
| 7953418 | NM_002286   | LAG3         | lymphocyte activation gene 3                           | 0.049  | 1.034 | 7.57E-01 | 7.57E+01 |  |  |
| 7953428 | NM_000616   | CD4          | CD4 molecule                                           | 0.261  | 1.199 | 1.47E-02 | 1.47E+00 |  |  |
| 7953450 | NM_014262   | LEPREL2      | leprecan-like 2                                        | -0.066 | 0.955 | 3.12E-01 | 3.12E+01 |  |  |
| 7953469 | NM_002075   | GNB3         | guanine nucleotide binding protein (G-protein) beta-3  | 0.002  | 1.001 | 9.91E-01 | 9.91E+01 |  |  |
| 7953483 | NM_00109853 | USP5         | ubiquitin specific peptidase 5 (isozyme 5)             | 0.042  | 1.029 | 7.72E-01 | 7.72E+01 |  |  |
| 7953508 | NM_000365   | TP1          | triosephosphate isomerase 1                            | -0.005 | 0.997 | 9.88E-01 | 9.88E+01 |  |  |
| 7953516 | NR_002803   | RPL13P5      | ribosomal protein L13 pseudogene                       | -0.058 | 0.960 | 6.95E-01 | 6.95E+01 |  |  |
| 7953518 | U72518      | LOC171220    | destrin-2 pseudogene                                   | -0.085 | 0.943 | 7.15E-01 | 7.15E+01 |  |  |
| 7953520 | NM_021650   | LRRC23       | leucine rich repeat containing 23                      | -0.064 | 0.957 | 6.55E-01 | 6.55E+01 |  |  |
| 7953532 | NM_001975   | ENO2         | enolase 2 (gamma, neuronal)                            | -0.220 | 0.859 | 5.29E-02 | 5.29E+00 |  |  |
| 7953547 | NM_00100702 | ATN1         | atrophy 1                                              | -0.040 | 0.972 | 7.09E-01 | 7.09E+01 |  |  |
| 7953564 | NM_0138425  | C12orf57     | chromosome 12 open reading frame 57                    | 0.025  | 1.017 | 9.53E-01 | 9.53E+01 |  |  |
| 7953569 | NM_080549   | PTPN6        | protein tyrosine phosphatase, non-receptor type 6      | 0.304  | 1.234 | 1.49E-02 | 1.49E+00 |  |  |
| 7953594 | NM_006331   | EMG1         | EMG1 nucleolar protein homolog                         | -0.028 | 0.981 | 9.18E-01 | 9.18E+01 |  |  |
| 7953622 | AY358730    | UNQ2963      | hypothetical LOC283314                                 | -0.009 | 0.994 | 9.77E-01 | 9.77E+01 |  |  |
| 7953626 | NM_014718   | CLSTN3       | calsynenin 3                                           | -0.032 | 0.978 | 8.49E-01 | 8.49E+01 |  |  |
| 7953651 | NM_00113102 | PEX5         | peroxisomal biogenesis factor 5                        | 0.030  | 1.021 | 8.71E-01 | 8.71E+01 |  |  |
| 7953665 | NM_0199286  | DPPA3        | developmental pluripotency associated 3                | 0.024  | 1.017 | 9.50E-01 | 9.50E+01 |  |  |
| 7953675 | NM_024865   | NANOG        | Nanog homeobox                                         | -0.031 | 0.979 | 8.49E-01 | 8.49E+01 |  |  |
| 7953697 | ---         | ---          | ---                                                    | -0.180 | 0.883 | 3.09E-01 | 3.09E+01 |  |  |
| 7953699 | NM_018416   | FOXJ2        | forkhead box J2                                        | -0.034 | 0.977 | 7.58E-01 | 7.58E+01 |  |  |
| 7953715 | NR_024260   | NECAP1       | NECAP endocytosis associated 1                         | -0.066 | 0.955 | 6.80E-01 | 6.80E+01 |  |  |
| 7953723 | NM_016184   | CLEC4A       | C-type lectin domain family 4, member A                | 0.251  | 1.190 | 6.40E-01 | 6.40E+01 |  |  |
| 7953735 | NR_027000   | LOC349196    | hypothetical LOC349196                                 | -0.124 | 0.918 | 3.93E-01 | 3.93E+01 |  |  |
| 7953737 | NM_00100703 | CLEC6A       | C-type lectin domain family 6, member A                | 0.776  | 1.712 | 1.14E-01 | 1.14E+01 |  |  |
| 7953749 | NM_080387   | CLEC4D       | C-type lectin domain family 4, member D                | 0.366  | 1.289 | 3.52E-01 | 3.52E+01 |  |  |
| 7953763 | ---         | ---          | ---                                                    | -0.015 | 0.990 | 9.17E-01 | 9.17E+01 |  |  |
| 7953765 | NM_020734   | RIMKB        | ribosomal modification protein ribosomal               | -0.074 | 0.950 | 7.70E-01 | 7.70E+01 |  |  |
| 7953812 | NM_004426   | PHC1         | polyhomeotic homolog 1 (Drosophila)                    | -0.003 | 0.998 | 9.85E-01 | 9.85E+01 |  |  |
| 7953835 | NM_005810   | KLRG1        | killer cell lectin-like receptor subfamily 1, member G | 0.204  | 1.152 | 6.64E-01 | 6.64E+01 |  |  |
| 7953844 | NM_004400   | DDX12        | DEAD/H (Asp-Glu-Ala-Asp/His) box protein 12            | 0.011  | 1.007 | 9.78E-01 | 9.78E+01 |  |  |
| 7953878 | NM_00100441 | CLEC2D       | C-type lectin domain family 2, member D                | -0.087 | 0.942 | 4.12E-01 | 4.12E+01 |  |  |
| 7953892 | NM_016523   | KLRF1        | killer cell lectin-like receptor subfamily 1, member F | 0.403  | 1.322 | 5.09E-01 | 5.09E+01 |  |  |
| 7953943 | NM_031412   | GABARAPL1    | GABA(A) receptor-associated protein 1                  | -0.273 | 0.827 | 6.50E-03 | 6.50E-01 |  |  |
| 7953949 | NM_002262   | KLRD1        | killer cell lectin-like receptor subfamily 1, member D | 0.133  | 1.096 | 7.97E-01 | 7.97E+01 |  |  |
| 7953977 | ---         | ---          | ---                                                    | 0.188  | 1.139 | 8.88E-01 | 8.88E+01 |  |  |
| 7953981 | NM_001987   | ETV6         | ets variant 6                                          | 0.109  | 1.079 | 5.62E-01 | 5.62E+01 |  |  |
| 7953993 | NM_030766   | BCL2L14      | BCL2-like 14 (apoptosis facilitator)                   | 0.078  | 1.055 | 6.33E-01 | 6.33E+01 |  |  |
| 7954006 | ---         | ---          | ---                                                    | 0.007  | 1.005 | 9.64E-01 | 9.64E+01 |  |  |
| 7954008 | ---         | ---          | ---                                                    | 0.074  | 1.053 | 6.66E-01 | 6.66E+01 |  |  |
| 7954012 | NM_058169   | LOH12CR1     | loss of heterozygosity, 12, chromosome 1               | 0.021  | 1.015 | 9.09E-01 | 9.09E+01 |  |  |
| 7954021 | NM_001310   | CREBL2       | cAMP responsive element binding protein 2              | 0.265  | 1.201 | 2.11E-02 | 2.11E+00 |  |  |
| 7954029 | NM_004064   | CDKN1B       | cyclin-dependent kinase inhibitor 1B                   | -0.138 | 0.909 | 1.00E-01 | 1.00E+01 |  |  |
| 7954036 | NM_016355   | DDX47        | DEAD (Asp-Glu-Ala-Asp) box polypeptide 47              | 0.027  | 1.019 | 8.91E-01 | 8.91E+01 |  |  |
| 7954055 | NM_00113041 | APOLD1       | apolipoprotein L domain containing 1                   | -0.022 | 0.985 | 9.49E-01 | 9.49E+01 |  |  |
| 7954061 | ---         | ---          | ---                                                    | -0.019 | 0.987 | 9.18E-01 | 9.18E+01 |  |  |
| 7954063 | NR_003932   | RPL13AP20    | ribosomal protein L13a pseudogene                      | -0.043 | 0.970 | 8.05E-01 | 8.05E+01 |  |  |
| 7954071 | NR_002774   | HTR7P        | 5-hydroxytryptamine (serotonin) receptor 7             | -0.043 | 0.971 | 7.77E-01 | 7.77E+01 |  |  |
| 7954077 | NM_020853   | KIAA1467     | KIAA1467                                               | 0.046  | 1.033 | 6.92E-01 | 6.92E+01 |  |  |
| 7954090 | NM_001423   | EMP1         | epithelial membrane protein 1                          | 0.453  | 1.368 | 1.82E-01 | 1.82E+01 |  |  |
| 7954104 | NM_018179   | ATF7IP       | activating transcription factor 7 interacting protein  | 0.010  | 1.007 | 9.56E-01 | 9.56E+01 |  |  |
| 7954124 | NM_017925   | H2AFJ        | H2A histone family, member J                           | -0.031 | 0.979 | 8.53E-01 | 8.53E+01 |  |  |
| 7954173 | NM_007178   | STRAP        | serine/threonine kinase receptor subfamily 1, member A | -0.019 | 0.987 | 9.22E-01 | 9.22E+01 |  |  |
| 7954185 | NM_015954   | DERA         | 2-deoxyribose-5-phosphate aldolase                     | 0.059  | 1.042 | 7.94E-01 | 7.94E+01 |  |  |
| 7954243 | ---         | ---          | ---                                                    | -0.028 | 0.981 | 9.04E-01 | 9.04E+01 |  |  |
| 7954277 | ---         | ---          | ---                                                    | -0.033 | 0.977 | 8.09E-01 | 8.09E+01 |  |  |
| 7954279 | NM_0153207  | AEBP2        | AE binding protein 2                                   | -0.017 | 0.988 | 8.96E-01 | 8.96E+01 |  |  |
| 7954310 | NR_003286   | LOC100008588 | 18S ribosomal RNA                                      | -0.010 | 0.993 | 9.51E-01 | 9.51E+01 |  |  |
| 7954382 | NM_024854   | PYROXD1      | pyridine nucleotide-disulphide oxidoreductase 1        | 0.105  | 1.075 | 5.77E-01 | 5.77E+01 |  |  |
| 7954388 | NM_016072   | GOLT1B       | golgi transport 1 homolog B (S. cerevisiae)            | 0.106  | 1.076 | 2.98E-01 | 2.98E+01 |  |  |
| 7954407 | NM_018686   | CMAS         | cytidine monophosphate N-acetyltransferase             | 0.034  | 1.024 | 8.37E-01 | 8.37E+01 |  |  |
| 7954419 | NM_018638   | ETNK1        | ethanolamine kinase 1                                  | 0.167  | 1.123 | 1.37E-03 | 1.37E-01 |  |  |
| 7954434 | ---         | ---          | ---                                                    | -0.123 | 0.918 | 2.25E-01 | 2.25E+01 |  |  |
| 7954436 | NM_006152   | LRMP         | lymphoid-restricted membrane protein                   | 0.240  | 1.181 | 2.07E-02 | 2.07E+00 |  |  |
| 7954460 | NM_00100166 | LYRM5        | LYR motif containing 5                                 | -0.059 | 0.960 | 7.25E-01 | 7.25E+01 |  |  |
| 7954465 | ---         | ---          | ---                                                    | -0.142 | 0.907 | 1.60E-01 | 1.60E+01 |  |  |
| 7954469 | NM_007211   | RASSF8       | Ras association (RalGDS/AF-6) domain containing 8      | -0.033 | 0.977 | 8.78E-01 | 8.78E+01 |  |  |
| 7954481 | NM_005086   | SSPN         | sarcomin (Kras oncogene-associated protein)            | 0.005  | 1.004 | 9.88E-01 | 9.88E+01 |  |  |

|         |               |               |                                      |        |       |          |          |  |
|---------|---------------|---------------|--------------------------------------|--------|-------|----------|----------|--|
| 7954492 | NM_015633     | FGFR1OP2      | FGFR1 oncogene partner 2             | 0.128  | 1.093 | 1.17E-01 | 1.17E+01 |  |
| 7954503 | NM_004264     | MED21         | mediator complex subunit 21          | -0.055 | 0.962 | 7.41E-01 | 7.41E+01 |  |
| 7954511 | NM_015000     | STK38L        | serine/threonine kinase 38 like      | 0.201  | 1.150 | 1.52E-01 | 1.52E+01 |  |
| 7954559 | NM_003622     | PPFIBP1       | PTPRF interacting protein, binding   | -0.196 | 0.873 | 2.22E-01 | 2.22E+01 |  |
| 7954591 | NM_021821     | MRPS35        | mitochondrial ribosomal protein S    | 0.160  | 1.117 | 3.10E-01 | 3.10E+01 |  |
| 7954602 | ---           | ---           | ---                                  | 0.153  | 1.112 | 8.13E-01 | 8.13E+01 |  |
| 7954604 | NM_020782     | KLHDC5        | kelch domain containing 5            | -0.002 | 0.999 | 9.92E-01 | 9.92E+01 |  |
| 7954613 | NM_018318     | CCDC91        | coiled-coil domain containing 91     | 0.000  | 1.000 | 1.00E+00 | 1.00E+02 |  |
| 7954631 | NM_018099     | FAR2          | fatty acyl CoA reductase 2           | 0.027  | 1.019 | 9.27E-01 | 9.27E+01 |  |
| 7954645 | NM_00108050   | TSPAN11       | tetraspanin 11                       | -0.037 | 0.975 | 7.69E-01 | 7.69E+01 |  |
| 7954653 | NM_00108050   | TSPAN11       | tetraspanin 11                       | 0.004  | 1.003 | 9.84E-01 | 9.84E+01 |  |
| 7954655 | NM_030653     | DDX11         | DEAD/H (Asp-Glu-Ala-Asp/His) box     | 0.009  | 1.006 | 9.77E-01 | 9.77E+01 |  |
| 7954690 | ---           | ---           | ---                                  | -0.068 | 0.954 | 7.72E-01 | 7.72E+01 |  |
| 7954692 | NR_026806     | FLJ13224      | hypothetical protein FLJ13224        | -0.100 | 0.933 | 4.32E-01 | 4.32E+01 |  |
| 7954697 | ---           | ---           | ---                                  | 0.083  | 1.059 | 7.03E-01 | 7.03E+01 |  |
| 7954711 | NM_018169     | C12orf35      | chromosome 12 open reading frame     | -0.079 | 0.947 | 3.27E-01 | 3.27E+01 |  |
| 7954717 | NM_001714     | BICD1         | bicaudal D homolog 1 (Drosophila)    | -0.062 | 0.958 | 6.63E-01 | 6.63E+01 |  |
| 7954752 | NM_012062     | DNM1L         | dynamitin 1-like                     | -0.036 | 0.975 | 8.09E-01 | 8.09E+01 |  |
| 7954787 | ---           | ---           | ---                                  | -0.051 | 0.965 | 5.96E-01 | 5.96E+01 |  |
| 7954810 | NM_198578     | LRRK2         | leucine-rich repeat kinase 2         | 0.444  | 1.360 | 2.25E-01 | 2.25E+01 |  |
| 7954940 | NM_016488     | PPHLN1        | periplakin 1                         | 0.000  | 1.000 | 1.00E+00 | 1.00E+02 |  |
| 7954961 | ---           | ---           | ---                                  | 0.023  | 1.016 | 9.05E-01 | 9.05E+01 |  |
| 7954963 | ---           | ---           | ---                                  | 0.064  | 1.045 | 5.48E-01 | 5.48E+01 |  |
| 7954969 | NM_00111418   | IRAK4         | interleukin-1 receptor-associated    | 0.143  | 1.104 | 3.73E-01 | 3.73E+01 |  |
| 7954997 | NM_00102535   | ANO6          | anoctamin 6                          | -0.032 | 0.978 | 9.22E-01 | 9.22E+01 |  |
| 7955019 | NM_152641     | ARID2         | AT rich interactive domain 2 (ARID   | -0.080 | 0.946 | 5.34E-01 | 5.34E+01 |  |
| 7955043 | ---           | ---           | ---                                  | -0.064 | 0.957 | 8.93E-01 | 8.93E+01 |  |
| 7955045 | BC008360      | FAM113B       | family with sequence similarity 11   | 0.135  | 1.098 | 2.29E-01 | 2.29E+01 |  |
| 7955055 | NM_017842     | SLC48A1       | solute carrier family 48 (heme trans | -0.047 | 0.968 | 7.15E-01 | 7.15E+01 |  |
| 7955063 | NM_00114384   | TMEM106C      | transmembrane protein 106C           | -0.056 | 0.962 | 8.06E-01 | 8.06E+01 |  |
| 7955076 | ---           | ---           | ---                                  | -0.056 | 0.962 | 7.32E-01 | 7.32E+01 |  |
| 7955078 | NM_000289     | PFKM          | phosphofructokinase, muscle          | 0.025  | 1.018 | 9.19E-01 | 9.19E+01 |  |
| 7955107 | NM_00101363   | C12orf68      | chromosome 12 open reading frame     | -0.083 | 0.944 | 5.03E-01 | 5.03E+01 |  |
| 7955110 | ENST000004540 | DKFZP779L1853 | hypothetical LOC643162               | -0.027 | 0.982 | 9.22E-01 | 9.22E+01 |  |
| 7955112 | NM_181788     | H1FNT         | H1 histone family, member N, test    | 0.000  | 1.000 | 1.00E+00 | 1.00E+02 |  |
| 7955142 | NM_000725     | CACNB3        | calcium channel, voltage-depende     | -0.080 | 0.946 | 5.17E-01 | 5.17E+01 |  |
| 7955156 | NM_033124     | CCDC65        | coiled-coil domain containing 65     | 0.030  | 1.021 | 9.09E-01 | 9.09E+01 |  |
| 7955170 | NM_005430     | WNT1          | wingless-type MMTV integration s     | -0.012 | 0.992 | 9.34E-01 | 9.34E+01 |  |
| 7955179 | NM_032704     | TUBA1C        | tubulin, alpha 1c                    | -0.005 | 0.997 | 9.86E-01 | 9.86E+01 |  |
| 7955184 | NM_006262     | PRPH          | peripherin                           | -0.049 | 0.967 | 7.16E-01 | 7.16E+01 |  |
| 7955195 | NM_005480     | TROAP         | trophinin associated protein (tasti  | -0.026 | 0.982 | 8.48E-01 | 8.48E+01 |  |
| 7955231 | NM_012284     | KCNH3         | potassium voltage-gated channel,     | -0.061 | 0.959 | 4.84E-01 | 4.84E+01 |  |
| 7955250 | NM_012272     | PRPF40B       | PRP40 pre-mRNA processing facto      | -0.103 | 0.931 | 1.46E-01 | 1.46E+01 |  |
| 7955277 | NM_003217     | TMBIM6        | transmembrane BAX inhibitor mot      | 0.048  | 1.034 | 7.23E-01 | 7.23E+01 |  |
| 7955290 | NM_000486     | AQP2          | aquaporin 2 (collecting duct)        | -0.027 | 0.981 | 7.26E-01 | 7.26E+01 |  |
| 7955297 | NM_001651     | AQP5          | aquaporin 5                          | 0.015  | 1.011 | 9.22E-01 | 9.22E+01 |  |
| 7955305 | NM_001652     | AQP6          | aquaporin 6, kidney specific         | -0.014 | 0.990 | 9.19E-01 | 9.19E+01 |  |
| 7955331 | NM_003076     | SMARCD1       | SWI/SNF related, matrix associat     | -0.050 | 0.966 | 6.66E-01 | 6.66E+01 |  |
| 7955348 | NM_005276     | GPD1          | glycerol-3-phosphate dehydrogen      | -0.044 | 0.970 | 6.99E-01 | 6.99E+01 |  |
| 7955358 | BC007849      | C12orf62      | chromosome 12 open reading frame     | 0.017  | 1.012 | 9.49E-01 | 9.49E+01 |  |
| 7955361 | NM_052879     | LARP4         | La ribonucleoprotein domain fami     | 0.142  | 1.103 | 1.19E-01 | 1.19E+01 |  |
| 7955376 | NM_173602     | DIP2B         | DIP2 disco-interacting protein 2 h   | 0.131  | 1.095 | 2.35E-01 | 2.35E+01 |  |
| 7955419 | ---           | ---           | ---                                  | 0.188  | 1.139 | 3.80E-01 | 3.80E+01 |  |
| 7955425 | NM_005171     | ATF1          | activating transcription factor 1    | -0.017 | 0.988 | 9.47E-01 | 9.47E+01 |  |
| 7955450 | NM_015416     | LETMD1        | LETMD1 domain containing 1           | 0.009  | 1.006 | 9.77E-01 | 9.77E+01 |  |
| 7955462 | ---           | ---           | ---                                  | 0.294  | 1.226 | 2.84E-01 | 2.84E+01 |  |
| 7955464 | NM_014764     | DAZAP2        | DAZ associated protein 2             | 0.038  | 1.027 | 7.92E-01 | 7.92E+01 |  |
| 7955469 | NM_00103996   | SLC4A8        | solute carrier family 4, sodium bic  | 0.102  | 1.073 | 5.91E-01 | 5.91E+01 |  |
| 7955535 | NM_004302     | ACVR1B        | activin A receptor, type IB          | 0.072  | 1.051 | 7.25E-01 | 7.25E+01 |  |
| 7955562 | NM_000020     | ACVRL1        | activin A receptor type II-like 1    | 0.042  | 1.029 | 7.96E-01 | 7.96E+01 |  |
| 7955578 | NM_181711     | GRASP         | GRP1 (general receptor for phosph    | -0.098 | 0.934 | 3.36E-01 | 3.36E+01 |  |
| 7955589 | NM_002135     | NR4A1         | nuclear receptor subfamily 4, grou   | -0.085 | 0.943 | 3.18E-01 | 3.18E+01 |  |
| 7955606 | NM_021934     | C12orf44      | chromosome 12 open reading frame     | 0.082  | 1.058 | 4.59E-01 | 4.59E+01 |  |
| 7955613 | NM_005556     | KRT7          | keratin 7                            | 0.019  | 1.014 | 9.04E-01 | 9.04E+01 |  |
| 7955624 | NM_002284     | KRT86         | keratin 86                           | -0.016 | 0.989 | 9.16E-01 | 9.16E+01 |  |
| 7955637 | NM_199187     | KRT18         | keratin 18                           | 0.006  | 1.004 | 9.79E-01 | 9.79E+01 |  |
| 7955646 | NM_001417     | EIF4B         | eukaryotic translation initiation fa | -0.016 | 0.989 | 9.30E-01 | 9.30E+01 |  |
| 7955663 | NM_170754     | TENC1         | tensin like C1 domain containing p   | -0.026 | 0.982 | 8.16E-01 | 8.16E+01 |  |
| 7955694 | NM_002178     | IGFBP6        | insulin-like growth factor binding   | -0.019 | 0.987 | 9.03E-01 | 9.03E+01 |  |
| 7955702 | NM_003578     | SOAT2         | sterol O-acyltransferase 2           | 0.073  | 1.052 | 4.19E-01 | 4.19E+01 |  |
| 7955719 | NM_00109966   | HIGD1A        | HIG1 hypoxia inducible domain fa     | 0.010  | 1.007 | 9.65E-01 | 9.65E+01 |  |
| 7955721 | NM_00100430   | ZNF740        | zinc finger protein 740              | 0.023  | 1.016 | 8.98E-01 | 8.98E+01 |  |
| 7955729 | NM_032889     | MFS5          | major facilitator superfamily dom    | 0.168  | 1.124 | 2.37E-01 | 2.37E+01 |  |
| 7955768 | NM_002624     | PFDN5         | prefoldin subunit 5                  | 0.061  | 1.043 | 6.14E-01 | 6.14E+01 |  |
| 7955777 | NM_021640     | C12orf10      | chromosome 12 open reading frame     | 0.048  | 1.034 | 7.40E-01 | 7.40E+01 |  |
| 7955787 | NM_138473     | SP1           | Sp1 transcription factor             | 0.031  | 1.022 | 7.89E-01 | 7.89E+01 |  |
| 7955797 | NM_020547     | AMHR2         | anti-Mullerian hormone receptor,     | -0.067 | 0.955 | 3.40E-01 | 3.40E+01 |  |

|         |             |         |                                                         |        |       |          |          |  |
|---------|-------------|---------|---------------------------------------------------------|--------|-------|----------|----------|--|
| 7955810 | NM_018457   | PRR13   | proline rich 13                                         | 0.043  | 1.030 | 7.61E-01 | 7.61E+01 |  |
| 7955817 | NM_005016   | PCBP2   | poly(rC) binding protein 2                              | -0.024 | 0.984 | 8.30E-01 | 8.30E+01 |  |
| 7955829 | NM_134323   | TARBP2  | TAR (HIV-1) RNA binding protein 2                       | -0.032 | 0.978 | 7.42E-01 | 7.42E+01 |  |
| 7955845 | NM_017410   | HOXC13  | homeobox C13                                            | 0.015  | 1.010 | 9.20E-01 | 9.20E+01 |  |
| 7955852 | NM_173860   | HOXC12  | homeobox C12                                            | -0.022 | 0.985 | 8.85E-01 | 8.85E+01 |  |
| 7955890 | NM_031157   | HNRNPA1 | heterogeneous nuclear ribonucleoprotein A1              | -0.094 | 0.937 | 3.90E-01 | 3.90E+01 |  |
| 7955896 | NM_016057   | COPZ1   | coatamer protein complex, subunit gamma                 | -0.039 | 0.973 | 8.93E-01 | 8.93E+01 |  |
| 7955908 | NM_005337   | NCKAP1L | NCK-associated protein 1-like                           | 0.187  | 1.139 | 1.02E-01 | 1.02E+01 |  |
| 7955943 | NM_000924   | PDE1B   | phosphodiesterase 1B, calmodulin-dependent              | 0.017  | 1.012 | 9.17E-01 | 9.17E+01 |  |
| 7955974 | NM_021191   | NEUROD4 | neurogenic differentiation 4                            | -0.037 | 0.974 | 7.23E-01 | 7.23E+01 |  |
| 7956007 | NM_206899   | OR10P1  | olfactory receptor, family 10, subfamily 1              | -0.082 | 0.945 | 4.41E-01 | 4.41E+01 |  |
| 7956009 | NM_152637   | METTL7B | methyltransferase like 7B                               | 0.220  | 1.165 | 5.45E-02 | 5.45E+00 |  |
| 7956013 | NM_001487   | BLOC1S1 | biogenesis of lysosomal organelles complex 1 subunit 1  | 0.123  | 1.089 | 4.27E-01 | 4.27E+01 |  |
| 7956018 | NM_002905   | RDH5    | retinol dehydrogenase 5 (11-cis/9-cis)                  | -0.007 | 0.995 | 9.73E-01 | 9.73E+01 |  |
| 7956026 | NM_005811   | GDF11   | growth differentiation factor 11                        | -0.048 | 0.968 | 7.52E-01 | 7.52E+01 |  |
| 7956031 | NM_014182   | ORMDL2  | ORM1-like 2 (S. cerevisiae)                             | 0.073  | 1.052 | 7.09E-01 | 7.09E+01 |  |
| 7956038 | NM_002429   | MMP19   | matrix metalloproteinase 19                             | 0.082  | 1.058 | 5.95E-01 | 5.95E+01 |  |
| 7956044 | ---         | ---     | ---                                                     | -0.045 | 0.969 | 7.75E-01 | 7.75E+01 |  |
| 7956046 | NM_201444   | DGKA    | diacylglycerol kinase, alpha 80kDa                      | -0.061 | 0.959 | 7.97E-01 | 7.97E+01 |  |
| 7956076 | NM_001798   | CDK2    | cyclin-dependent kinase 2                               | -0.121 | 0.920 | 4.70E-01 | 4.70E+01 |  |
| 7956088 | NM_002868   | RAB5B   | RAB5B, member RAS oncogene family                       | -0.080 | 0.946 | 5.55E-01 | 5.55E+01 |  |
| 7956097 | NM_000456   | SUOX    | sulfite oxidase                                         | -0.077 | 0.948 | 6.61E-01 | 6.61E+01 |  |
| 7956105 | NM_022465   | IKZF4   | IKAROS family zinc finger 4 (Eos)                       | 0.064  | 1.046 | 6.42E-01 | 6.42E+01 |  |
| 7956114 | NM_001029   | RPS26   | ribosomal protein S26                                   | 0.014  | 1.010 | 9.74E-01 | 9.74E+01 |  |
| 7956152 | NM_006191   | PA2G4   | proliferation-associated 2G4, 38kDa                     | -0.009 | 0.994 | 9.63E-01 | 9.63E+01 |  |
| 7956159 | NM_00103526 | RPL41   | ribosomal protein L41                                   | 0.011  | 1.008 | 9.75E-01 | 9.75E+01 |  |
| 7956162 | NM_032786   | ZC3H10  | zinc finger CCHC-type containing 3                      | -0.149 | 0.902 | 3.53E-02 | 3.53E+00 |  |
| 7956166 | NM_015292   | ESYT1   | extended synaptotagmin-like protein 1                   | 0.028  | 1.020 | 8.44E-01 | 8.44E+01 |  |
| 7956200 | NM_002475   | MYL6B   | myosin, light chain 6B, alkali, smooth muscle           | 0.013  | 1.009 | 9.44E-01 | 9.44E+01 |  |
| 7956211 | NM_021019   | MYL6    | myosin, light chain 6, alkali, smooth muscle            | -0.008 | 0.994 | 9.65E-01 | 9.65E+01 |  |
| 7956220 | NM_024068   | OBFC2B  | oligonucleotide/oligosaccharide-binding factor 2B       | 0.051  | 1.036 | 8.46E-01 | 8.46E+01 |  |
| 7956229 | NM_00113519 | SLC39A5 | solute carrier family 39 (metal ion transporters)       | -0.036 | 0.975 | 7.94E-01 | 7.94E+01 |  |
| 7956242 | NM_144576   | COQ10A  | coenzyme Q10 homolog A (S. cerevisiae)                  | -0.088 | 0.941 | 5.45E-01 | 5.45E+01 |  |
| 7956251 | NM_016584   | IL23A   | interleukin 23, alpha subunit p19                       | -0.086 | 0.942 | 6.78E-01 | 6.78E+01 |  |
| 7956257 | NM_207344   | SPRYD4  | SPRY domain containing 4                                | 0.050  | 1.035 | 8.24E-01 | 8.24E+01 |  |
| 7956261 | NM_002898   | RBMS2   | RNA binding motif, single stranded                      | 0.163  | 1.120 | 3.41E-01 | 3.41E+01 |  |
| 7956269 | ---         | ---     | ---                                                     | 0.150  | 1.110 | 7.32E-01 | 7.32E+01 |  |
| 7956281 | NM_007264   | GPR182  | G protein-coupled receptor 182                          | 0.040  | 1.028 | 7.38E-01 | 7.38E+01 |  |
| 7956285 | AF529371    | HBCBP   | HBCAg-binding protein                                   | -0.012 | 0.992 | 9.40E-01 | 9.40E+01 |  |
| 7956287 | NM_005967   | NAB2    | NGFI-A binding protein 2 (EGR1 binding protein)         | 0.037  | 1.026 | 6.28E-01 | 6.28E+01 |  |
| 7956301 | NM_002332   | LRP1    | low density lipoprotein-related protein 1               | 0.318  | 1.247 | 1.51E-01 | 1.51E+01 |  |
| 7956395 | NM_007224   | NXP4    | neuraxophilin 4                                         | -0.057 | 0.961 | 6.76E-01 | 6.76E+01 |  |
| 7956401 | NM_005412   | SHMT2   | serine hydroxymethyltransferase 2                       | -0.006 | 0.996 | 9.86E-01 | 9.86E+01 |  |
| 7956417 | ---         | ---     | ---                                                     | 0.261  | 1.198 | 3.13E-01 | 3.13E+01 |  |
| 7956419 | ---         | ---     | ---                                                     | 0.039  | 1.027 | 8.68E-01 | 8.68E+01 |  |
| 7956423 | NM_005538   | INHBC   | inhibin, beta C                                         | -0.029 | 0.980 | 8.49E-01 | 8.49E+01 |  |
| 7956426 | NM_031479   | INHBE   | inhibin, beta E                                         | 0.052  | 1.037 | 7.00E-01 | 7.00E+01 |  |
| 7956430 | NM_005269   | GLI1    | GLI family zinc finger 1                                | 0.040  | 1.028 | 8.16E-01 | 8.16E+01 |  |
| 7956443 | NM_004990   | MARS    | methionyl-tRNA synthetase                               | -0.051 | 0.966 | 6.78E-01 | 6.78E+01 |  |
| 7956470 | NM_052897   | MBD6    | methyl-CpG binding domain protein 6                     | -0.089 | 0.940 | 4.58E-01 | 4.58E+01 |  |
| 7956488 | NM_004984   | KIF5A   | kinesin family member 5A                                | -0.028 | 0.981 | 7.94E-01 | 7.94E+01 |  |
| 7956522 | AF063608    | KIF5A   | kinesin family member 5A                                | 0.043  | 1.030 | 8.49E-01 | 8.49E+01 |  |
| 7956524 | NM_024779   | PIP4K2C | phosphatidylinositol-5-phosphate 4-kinase class 2 gamma | -0.047 | 0.968 | 8.16E-01 | 8.16E+01 |  |
| 7956539 | NM_178502   | DTX3    | deltex homolog 3 (Drosophila)                           | -0.014 | 0.990 | 9.50E-01 | 9.50E+01 |  |
| 7956551 | NM_182947   | GEFT    | RhoA/RAC/CDC42 exchange factor                          | -0.090 | 0.939 | 3.32E-01 | 3.32E+01 |  |
| 7956593 | NM_006812   | OS9     | osteosarcoma amplified 9, endoplasmic reticulum         | 0.120  | 1.087 | 5.34E-01 | 5.34E+01 |  |
| 7956613 | NM_005981   | TSPAN31 | tetraspanin 31                                          | 0.023  | 1.016 | 9.11E-01 | 9.11E+01 |  |
| 7956623 | NM_138396   | 40246   | membrane-associated ring finger protein 40246           | 0.018  | 1.013 | 9.24E-01 | 9.24E+01 |  |
| 7956639 | NM_005726   | TSMF    | Ts translation elongation factor, mitochondrial         | -0.064 | 0.956 | 7.05E-01 | 7.05E+01 |  |
| 7956658 | NM_004731   | SLC16A7 | solute carrier family 16, member 7                      | -0.205 | 0.867 | 2.98E-01 | 2.98E+01 |  |
| 7956668 | ---         | ---     | ---                                                     | 0.035  | 1.025 | 8.06E-01 | 8.06E+01 |  |
| 7956670 | NM_006313   | USP15   | ubiquitin specific peptidase 15                         | 0.118  | 1.085 | 6.08E-02 | 6.08E+00 |  |
| 7956697 | NM_015026   | MON2    | MON2 homolog (S. cerevisiae)                            | 0.045  | 1.032 | 7.11E-01 | 7.11E+01 |  |
| 7956737 | ---         | ---     | ---                                                     | -0.080 | 0.946 | 5.69E-01 | 5.69E+01 |  |
| 7956743 | NM_00103499 | RPL14   | ribosomal protein L14                                   | -0.027 | 0.982 | 8.62E-01 | 8.62E+01 |  |
| 7956749 | NM_014254   | TMEM5   | transmembrane protein 5                                 | 0.031  | 1.022 | 8.38E-01 | 8.38E+01 |  |
| 7956785 | NM_007235   | XPOT    | exportin, tRNA (nuclear export receptor)                | -0.026 | 0.982 | 8.86E-01 | 8.86E+01 |  |
| 7956795 | NM_013254   | TBK1    | TANK-binding kinase 1                                   | -0.101 | 0.932 | 6.91E-01 | 6.91E+01 |  |
| 7956819 | NM_178169   | RASSF3  | Ras association (RalGDS/AF-6) domain containing 3       | 0.070  | 1.050 | 7.05E-01 | 7.05E+01 |  |
| 7956842 | NM_014319   | LEM3    | LEM domain containing 3                                 | -0.026 | 0.982 | 8.69E-01 | 8.69E+01 |  |
| 7956867 | NM_003483   | HMGA2   | high mobility group AT-hook 2                           | -0.041 | 0.972 | 7.35E-01 | 7.35E+01 |  |
| 7956876 | NM_032338   | LLPH    | LLP homolog, long-term synaptic facilitation            | 0.015  | 1.010 | 9.53E-01 | 9.53E+01 |  |
| 7956878 | NM_007199   | IRAK3   | interleukin-1 receptor-associated kinase 3              | -0.321 | 0.800 | 5.35E-01 | 5.35E+01 |  |
| 7956894 | NM_033647   | HELB    | helicase (DNA) B                                        | 0.038  | 1.027 | 8.50E-01 | 8.50E+01 |  |
| 7956908 | ---         | ---     | ---                                                     | 0.028  | 1.020 | 9.28E-01 | 9.28E+01 |  |
| 7956910 | NM_018448   | CAND1   | cullin-associated and neddylation-inducible factor 1    | 0.005  | 1.003 | 9.78E-01 | 9.78E+01 |  |
| 7956930 | NM_006482   | DYRK2   | dual-specificity tyrosine-(Y)-phosphatase 2             | 0.072  | 1.051 | 3.41E-01 | 3.41E+01 |  |

|         |             |           |                                                                  |        |       |          |          |
|---------|-------------|-----------|------------------------------------------------------------------|--------|-------|----------|----------|
| 7956937 | NM_015646   | RAP1B     | RAP1B, member of RAS oncogene                                    | 0.078  | 1.056 | 4.81E-01 | 4.81E+01 |
| 7956949 | NM_020401   | NUP107    | nucleoporin 107kDa                                               | -0.026 | 0.982 | 9.09E-01 | 9.09E+01 |
| 7956978 | NM_018656   | SLC35E3   | solute carrier family 35, member 3                               | 0.006  | 1.004 | 9.82E-01 | 9.82E+01 |
| 7956989 | NM_002392   | MDM2      | Mdm2 p53 binding protein homolog                                 | -0.068 | 0.954 | 4.62E-01 | 4.62E+01 |
| 7957008 | NM_007007   | CPSF6     | cleavage and polyadenylation specificity factor 6                | -0.046 | 0.969 | 6.91E-01 | 6.91E+01 |
| 7957023 | NM_000239   | LYZ       | lysozyme (renal amyloidosis)                                     | 0.523  | 1.437 | 3.16E-01 | 3.16E+01 |
| 7957032 | NM_006530   | YEATS4    | YEATS domain containing 4                                        | 0.034  | 1.024 | 8.87E-01 | 8.87E+01 |
| 7957043 | NM_006654   | FRS2      | fibroblast growth factor receptor tyrosine kinase 2              | 0.042  | 1.030 | 7.72E-01 | 7.72E+01 |
| 7957052 | NM_006431   | CCT2      | chaperonin containing TCP1, subunit 2                            | -0.009 | 0.994 | 9.75E-01 | 9.75E+01 |
| 7957106 | NM_014515   | CNOT2     | CCR4-NOT transcription complex, subunit 2                        | 0.025  | 1.017 | 8.78E-01 | 8.78E+01 |
| 7957126 | NM_014505   | KCNMB4    | potassium large conductance calcium-activated channel member 4   | -0.071 | 0.952 | 4.70E-01 | 4.70E+01 |
| 7957167 | NM_018279   | TMEM19    | transmembrane protein 19                                         | 0.151  | 1.111 | 1.52E-01 | 1.52E+01 |
| 7957177 | NM_014999   | RAB21     | RAB21, member RAS oncogene family                                | -0.062 | 0.958 | 7.26E-01 | 7.26E+01 |
| 7957186 | NM_022771   | TBC1D15   | TBC1 domain family, member 15                                    | -0.007 | 0.995 | 9.77E-01 | 9.77E+01 |
| 7957242 | NM_00113626 | LOC552889 | hypothetical protein LOC552889                                   | 0.031  | 1.022 | 8.14E-01 | 8.14E+01 |
| 7957260 | NM_006851   | GLIPR1    | GLI pathogenesis-related 1                                       | 0.067  | 1.047 | 7.73E-01 | 7.73E+01 |
| 7957271 | ---         | ---       | ---                                                              | 0.049  | 1.034 | 8.07E-01 | 8.07E+01 |
| 7957275 | ---         | ---       | ---                                                              | -0.098 | 0.934 | 3.71E-01 | 3.71E+01 |
| 7957277 | NM_015336   | ZDHC17    | zinc finger, DHHC-type containing 17                             | 0.023  | 1.016 | 8.95E-01 | 8.95E+01 |
| 7957404 | BC029120    | C12orf26  | chromosome 12 open reading frame 26                              | 0.022  | 1.016 | 9.18E-01 | 9.18E+01 |
| 7957417 | NM_0152588  | TMTC2     | transmembrane and tetratricopeptide repeat domain containing 2   | 0.076  | 1.054 | 7.30E-01 | 7.30E+01 |
| 7957467 | NM_00100989 | C12orf29  | chromosome 12 open reading frame 29                              | 0.064  | 1.045 | 8.04E-01 | 8.04E+01 |
| 7957530 | NM_021104   | RPL41     | ribosomal protein L41                                            | 0.009  | 1.006 | 9.10E-01 | 9.10E+01 |
| 7957536 | uc001tcn.1  | NUDT4     | nudix (nucleoside diphosphate linked moiety X) motif 4           | 0.082  | 1.059 | 5.56E-01 | 5.56E+01 |
| 7957540 | NM_014050   | MRPL42    | mitochondrial ribosomal protein L42                              | 0.098  | 1.070 | 3.92E-01 | 3.92E+01 |
| 7957549 | ---         | ---       | ---                                                              | 0.063  | 1.045 | 8.06E-01 | 8.06E+01 |
| 7957551 | NM_003877   | SOC2      | suppressor of cytokine signaling 2                               | -0.151 | 0.900 | 2.80E-01 | 2.80E+01 |
| 7957560 | NM_003805   | CRADD     | CASP2 and RIPK1 domain containing                                | -0.028 | 0.981 | 8.45E-01 | 8.45E+01 |
| 7957568 | ---         | ---       | ---                                                              | -0.068 | 0.954 | 6.10E-01 | 6.10E+01 |
| 7957570 | NM_005761   | PLXNC1    | plexin C1                                                        | 0.378  | 1.299 | 1.67E-01 | 1.67E+01 |
| 7957604 | ---         | ---       | ---                                                              | -0.041 | 0.972 | 7.85E-01 | 7.85E+01 |
| 7957606 | ---         | ---       | ---                                                              | 0.039  | 1.028 | 8.25E-01 | 8.25E+01 |
| 7957611 | ---         | ---       | ---                                                              | 0.056  | 1.039 | 6.58E-01 | 6.58E+01 |
| 7957613 | NM_017599   | VEZT      | vezatin, adherens junctions transmembrane protein                | -0.003 | 0.998 | 9.88E-01 | 9.88E+01 |
| 7957633 | NM_006838   | METAP2    | methionyl aminopeptidase 2                                       | -0.021 | 0.985 | 8.90E-01 | 8.90E+01 |
| 7957649 | NM_003095   | SNRPF     | small nuclear ribonucleoprotein polypeptide F                    | 0.012  | 1.008 | 9.68E-01 | 9.68E+01 |
| 7957654 | NM_0152435  | AMDHD1    | amidohydrolase domain containing 1                               | 0.000  | 1.000 | 1.00E+00 | 1.00E+02 |
| 7957665 | NM_005230   | ELK3      | ELK3, ETS-domain protein (SRF coactivator)                       | -0.211 | 0.864 | 1.49E-02 | 1.49E+00 |
| 7957715 | NM_00113517 | NEDD1     | neural precursor cell expressed, developmentally downregulated 1 | 0.028  | 1.019 | 8.50E-01 | 8.50E+01 |
| 7957737 | NM_00103228 | TMPO      | thymopoietin                                                     | 0.060  | 1.043 | 6.58E-01 | 6.58E+01 |
| 7957746 | NM_013611   | SLC25A3   | solute carrier family 25 (mitochondrial carrier), member 3       | -0.027 | 0.981 | 8.36E-01 | 8.36E+01 |
| 7957759 | NM_018161   | APAF1     | apoptotic peptidase activating factor 1                          | 0.049  | 1.035 | 7.97E-01 | 7.97E+01 |
| 7957793 | NM_022496   | ACTR6     | ARP6 actin-related protein 6 homolog                             | 0.080  | 1.057 | 6.24E-01 | 6.24E+01 |
| 7957806 | NM_017988   | SCYL2     | SCY1-like 2 (S. cerevisiae)                                      | 0.078  | 1.055 | 6.38E-01 | 6.38E+01 |
| 7958000 | NM_020244   | CHPT1     | choline phosphotransferase 1                                     | 0.252  | 1.191 | 2.99E-02 | 2.99E+00 |
| 7958011 | ---         | ---       | ---                                                              | 0.170  | 1.125 | 2.66E-01 | 2.66E+01 |
| 7958015 | ---         | ---       | ---                                                              | 0.179  | 1.132 | 6.12E-01 | 6.12E+01 |
| 7958019 | NM_018370   | DRAM1     | DNA-damage regulated autophagy related 1                         | 0.615  | 1.531 | 1.79E-01 | 1.79E+01 |
| 7958051 | NM_004316   | ASCL1     | achaete-scute complex homolog 1                                  | -0.050 | 0.966 | 6.92E-01 | 6.92E+01 |
| 7958130 | NM_003299   | HSP90B1   | heat shock protein 90kDa beta (Grp94) class B member 1           | 0.181  | 1.133 | 4.66E-03 | 4.66E-01 |
| 7958147 | NM_003211   | TDG       | thymine-DNA glycosylase                                          | 0.037  | 1.026 | 8.62E-01 | 8.62E+01 |
| 7958152 | NM_002629   | PGAM1     | phosphoglycerate mutase 1 (brain)                                | -0.010 | 0.993 | 9.64E-01 | 9.64E+01 |
| 7958158 | NM_013320   | HCFC2     | host cell factor C2                                              | 0.131  | 1.095 | 4.44E-01 | 4.44E+01 |
| 7958174 | NM_003330   | TXNRD1    | thioredoxin reductase 1                                          | -0.139 | 0.908 | 5.10E-01 | 5.10E+01 |
| 7958197 | NR_001593   | RPL18AP3  | ribosomal protein L18a pseudogene                                | -0.009 | 0.994 | 9.74E-01 | 9.74E+01 |
| 7958200 | NM_00100839 | EID3      | EP300 interacting inhibitor of differentiation 3                 | 0.004  | 1.003 | 9.86E-01 | 9.86E+01 |
| 7958202 | NM_018413   | CHST11    | carbohydrate (chondroitin 4) sulfotransferase 11                 | 0.233  | 1.175 | 5.63E-02 | 5.63E+00 |
| 7958211 | NM_0152318  | C12orf45  | chromosome 12 open reading frame 45                              | 0.015  | 1.010 | 9.60E-01 | 9.60E+01 |
| 7958216 | NM_015275   | KIAA1033  | KIAA1033                                                         | 0.109  | 1.079 | 1.67E-01 | 1.67E+01 |
| 7958253 | NM_00114519 | C12orf75  | chromosome 12 open reading frame 75                              | -0.039 | 0.974 | 9.16E-01 | 9.16E+01 |
| 7958262 | NM_0152772  | TCP11L2   | t-complex 11 (mouse)-like 2                                      | -0.125 | 0.917 | 5.85E-01 | 5.85E+01 |
| 7958273 | ---         | ---       | ---                                                              | -0.269 | 0.830 | 9.17E-02 | 9.17E+00 |
| 7958275 | NM_018082   | POLR3B    | polymerase (RNA) III (DNA directed)                              | 0.010  | 1.007 | 9.77E-01 | 9.77E+01 |
| 7958331 | NM_018157   | RIC8B     | resistance to inhibitors of cholinesterase B                     | -0.074 | 0.950 | 6.34E-01 | 6.34E+01 |
| 7958346 | NM_0152261  | C12orf23  | chromosome 12 open reading frame 23                              | -0.069 | 0.953 | 7.09E-01 | 7.09E+01 |
| 7958352 | NM_00101807 | BTBD11    | BTB (POZ) domain containing 11                                   | -0.025 | 0.983 | 9.25E-01 | 9.25E+01 |
| 7958375 | ---         | ---       | ---                                                              | -0.198 | 0.872 | 2.08E-01 | 2.08E+01 |
| 7958379 | NM_007062   | PWP1      | PWP1 homolog (S. cerevisiae)                                     | -0.060 | 0.959 | 6.34E-01 | 6.34E+01 |
| 7958398 | NM_014653   | WSCD2     | WSC domain containing 2                                          | 0.014  | 1.010 | 9.27E-01 | 9.27E+01 |
| 7958410 | NM_007076   | FICD      | FIC domain containing                                            | 0.028  | 1.020 | 8.86E-01 | 8.86E+01 |
| 7958414 | NM_014301   | ISCU      | iron-sulfur cluster scaffold homolog                             | -0.113 | 0.925 | 4.12E-01 | 4.12E+01 |
| 7958439 | NM_032663   | USP30     | ubiquitin specific peptidase 30                                  | 0.050  | 1.036 | 8.26E-01 | 8.26E+01 |
| 7958453 | ---         | ---       | ---                                                              | 0.026  | 1.018 | 9.05E-01 | 9.05E+01 |
| 7958455 | NM_003362   | UNG       | uracil-DNA glycosylase                                           | -0.006 | 0.996 | 9.83E-01 | 9.83E+01 |
| 7958466 | NM_001093   | ACACB     | acetyl-Coenzyme A carboxylase beta subunit                       | -0.028 | 0.981 | 8.33E-01 | 8.33E+01 |
| 7958532 | NM_0130466  | UBE3B     | ubiquitin protein ligase E3B                                     | -0.038 | 0.974 | 7.09E-01 | 7.09E+01 |
| 7958565 | NM_000431   | MVK       | mevalonate kinase                                                | 0.050  | 1.036 | 5.98E-01 | 5.98E+01 |

|         |               |              |                                       |        |       |          |          |  |  |
|---------|---------------|--------------|---------------------------------------|--------|-------|----------|----------|--|--|
| 7958577 | NM_032829     | C12orf34     | chromosome 12 open reading fram       | -0.094 | 0.937 | 1.40E-01 | 1.40E+01 |  |  |
| 7958582 | NM_032300     | TCHP         | trichoplein, keratin filament bindin  | 0.001  | 1.000 | 9.97E-01 | 9.97E+01 |  |  |
| 7958600 | NM_033121     | ANKRD13A     | ankyrin repeat domain 13A             | 0.210  | 1.157 | 9.25E-03 | 9.25E-01 |  |  |
| 7958644 | NM_170665     | ATP2A2       | ATPase, Ca++ transporting, cardia     | 0.297  | 1.229 | 5.83E-03 | 5.83E-01 |  |  |
| 7958692 | NM_00108253   | TCTN1        | tectonic family member 1              | 0.143  | 1.104 | 1.03E-01 | 1.03E+01 |  |  |
| 7958724 | ENST000003311 | LOC100131138 | similar to hCG2040918                 | -0.011 | 0.993 | 9.53E-01 | 9.53E+01 |  |  |
| 7958726 | NM_015267     | CUX2         | cut-like homeobox 2                   | 0.002  | 1.001 | 9.89E-01 | 9.89E+01 |  |  |
| 7958749 | NM_005475     | SH2B3        | SH2B adaptor protein 3                | 0.001  | 1.001 | 9.92E-01 | 9.92E+01 |  |  |
| 7958759 | ---           | ---          | ---                                   | 0.066  | 1.047 | 7.68E-01 | 7.68E+01 |  |  |
| 7958761 | NM_00113653   | ACAD10       | acyl-Coenzyme A dehydrogenase f       | 0.006  | 1.004 | 9.78E-01 | 9.78E+01 |  |  |
| 7958784 | NM_000690     | ALDH2        | aldehyde dehydrogenase 2 family       | 0.019  | 1.013 | 9.60E-01 | 9.60E+01 |  |  |
| 7958800 | NM_003668     | MAPKAPK5     | mitogen-activated protein kinase-     | 0.080  | 1.057 | 4.81E-01 | 4.81E+01 |  |  |
| 7958819 | NM_006817     | ERP29        | endoplasmic reticulum protein 29      | 0.013  | 1.009 | 9.51E-01 | 9.51E+01 |  |  |
| 7958826 | ---           | ---          | ---                                   | 0.089  | 1.064 | 8.47E-01 | 8.47E+01 |  |  |
| 7958828 | NM_00114390   | TRAFD1       | TRAF-type zinc finger domain cont     | 0.139  | 1.101 | 5.15E-01 | 5.15E+01 |  |  |
| 7958846 | NM_002834     | PTPN11       | protein tyrosine phosphatase, nor     | -0.051 | 0.965 | 7.01E-01 | 7.01E+01 |  |  |
| 7958884 | NM_016816     | OAS1         | 2',5'-oligoadenylate synthetase 1,    | 0.551  | 1.466 | 1.03E-01 | 1.03E+01 |  |  |
| 7958895 | NM_006187     | OAS3         | 2'-5'-oligoadenylate synthetase 3,    | 0.250  | 1.189 | 4.27E-01 | 4.27E+01 |  |  |
| 7958913 | NM_002535     | OAS2         | 2'-5'-oligoadenylate synthetase 2,    | 0.297  | 1.229 | 2.53E-01 | 2.53E+01 |  |  |
| 7958931 | NM_004416     | DTX1         | deltex homolog 1 (Drosophila)         | 0.031  | 1.022 | 7.82E-01 | 7.82E+01 |  |  |
| 7958942 | NM_00114487   | CCDC42B      | coiled-coil domain containing 42B     | -0.048 | 0.967 | 6.95E-01 | 6.95E+01 |  |  |
| 7958948 | NM_00114487   | CCDC42B      | coiled-coil domain containing 42B     | -0.041 | 0.972 | 7.08E-01 | 7.08E+01 |  |  |
| 7958950 | BC022092      | C12orf52     | chromosome 12 open reading fram       | 0.012  | 1.008 | 9.38E-01 | 9.38E+01 |  |  |
| 7958960 | NM_00114381   | TPCN1        | two pore segment channel 1            | 0.181  | 1.134 | 2.91E-01 | 2.91E+01 |  |  |
| 7958989 | NM_173542     | PLBD2        | phospholipase B domain containin      | 0.033  | 1.023 | 8.70E-01 | 8.70E+01 |  |  |
| 7959002 | NM_138432     | SDSL         | serine dehydratase-like               | 0.087  | 1.062 | 3.29E-01 | 3.29E+01 |  |  |
| 7959014 | ---           | ---          | ---                                   | 0.106  | 1.076 | 7.53E-01 | 7.53E+01 |  |  |
| 7959016 | NR_027345     | NCRNA00173   | non-protein coding RNA 173            | -0.054 | 0.963 | 6.00E-01 | 6.00E+01 |  |  |
| 7959023 | NM_00108548   | MAP1LC3B2    | microtubule-associated protein 1      | -0.052 | 0.964 | 8.64E-01 | 8.64E+01 |  |  |
| 7959025 | NM_00110990   | RNFT2        | ring finger protein, transmembran     | 0.020  | 1.014 | 8.97E-01 | 8.97E+01 |  |  |
| 7959039 | NM_153348     | FBXW8        | F-box and WD repeat domain cont       | 0.044  | 1.031 | 7.30E-01 | 7.30E+01 |  |  |
| 7959052 | NM_181578     | RFC5         | replication factor C (activator 1) 5, | 0.196  | 1.145 | 1.51E-02 | 1.51E+00 |  |  |
| 7959070 | NM_002567     | PEBP1        | phosphatidylethanolamine bindin       | -0.095 | 0.936 | 3.41E-01 | 3.41E+01 |  |  |
| 7959078 | ---           | ---          | ---                                   | 0.050  | 1.035 | 6.13E-01 | 6.13E+01 |  |  |
| 7959080 | NM_022491     | SUDS3        | suppressor of defective silencing 3   | -0.029 | 0.980 | 8.27E-01 | 8.27E+01 |  |  |
| 7959087 | NM_194286     | KIAA1853     | KIAA1853                              | 0.066  | 1.047 | 5.57E-01 | 5.57E+01 |  |  |
| 7959100 | ---           | ---          | ---                                   | 0.073  | 1.052 | 5.90E-01 | 5.90E+01 |  |  |
| 7959123 | NM_006253     | PRKAB1       | protein kinase, AMP-activated, be     | 0.027  | 1.019 | 8.74E-01 | 8.74E+01 |  |  |
| 7959131 | NM_207311     | CCDC64       | coiled-coil domain containing 64      | -0.163 | 0.893 | 2.63E-01 | 2.63E+01 |  |  |
| 7959144 | ---           | ---          | ---                                   | -0.261 | 0.835 | 4.39E-01 | 4.39E+01 |  |  |
| 7959146 | NR_001577     | NME2P1       | non-metastatic cells 2, protein (NR   | 0.008  | 1.005 | 9.78E-01 | 9.78E+01 |  |  |
| 7959148 | NM_012240     | SIRT4        | sirtuin (silent mating type informa   | -0.122 | 0.919 | 5.54E-01 | 5.54E+01 |  |  |
| 7959153 | NM_004373     | COX6A1       | cytochrome c oxidase subunit VIa      | 0.031  | 1.022 | 8.63E-01 | 8.63E+01 |  |  |
| 7959157 | NM_176818     | GATC         | glutamyl-tRNA(Gln) amidotransfer      | 0.030  | 1.021 | 7.98E-01 | 7.98E+01 |  |  |
| 7959164 | NM_00103749   | DYNLL1       | dynein, light chain, LC8-type 1       | 0.020  | 1.014 | 9.29E-01 | 9.29E+01 |  |  |
| 7959173 | NM_014868     | RNF10        | ring finger protein 10                | 0.007  | 1.005 | 9.69E-01 | 9.69E+01 |  |  |
| 7959195 | NM_00103367   | CABP1        | calcium binding protein 1             | -0.013 | 0.991 | 9.42E-01 | 9.42E+01 |  |  |
| 7959205 | NM_014730     | MLEC         | malectin                              | 0.045  | 1.032 | 7.38E-01 | 7.38E+01 |  |  |
| 7959212 | NM_00108053   | UNC119B      | unc-119 homolog B (C. elegans)        | -0.103 | 0.931 | 2.99E-01 | 2.99E+01 |  |  |
| 7959220 | NM_000017     | ACADS        | acyl-Coenzyme A dehydrogenase,        | -0.031 | 0.979 | 8.40E-01 | 8.40E+01 |  |  |
| 7959232 | ---           | ---          | ---                                   | 0.010  | 1.007 | 9.68E-01 | 9.68E+01 |  |  |
| 7959234 | NM_000545     | HNF1A        | HNF1 homeobox A                       | 0.055  | 1.039 | 6.80E-01 | 6.80E+01 |  |  |
| 7959249 | ---           | ---          | ---                                   | 0.027  | 1.019 | 8.97E-01 | 8.97E+01 |  |  |
| 7959267 | NM_002560     | P2RX4        | purinergic receptor P2X, ligand-ga    | 0.315  | 1.244 | 1.11E-01 | 1.11E+01 |  |  |
| 7959282 | NM_194271     | RNF34        | ring finger protein 34                | -0.015 | 0.989 | 9.48E-01 | 9.48E+01 |  |  |
| 7959294 | NM_032790     | ORAI1        | ORAI calcium release-activated ca     | -0.061 | 0.959 | 5.89E-01 | 5.89E+01 |  |  |
| 7959298 | NM_00108082   | TMEM120B     | transmembrane protein 120B            | -0.103 | 0.931 | 4.10E-01 | 4.10E+01 |  |  |
| 7959312 | NM_00108082   | TMEM120B     | transmembrane protein 120B            | -0.246 | 0.843 | 9.22E-02 | 9.22E+00 |  |  |
| 7959314 | NM_015048     | SETD1B       | SET domain containing 1B              | 0.011  | 1.008 | 9.53E-01 | 9.53E+01 |  |  |
| 7959322 | NM_002813     | PSMD9        | proteasome (prosome, macropain        | 0.010  | 1.007 | 9.64E-01 | 9.64E+01 |  |  |
| 7959330 | NM_144668     | WDR66        | WD repeat domain 66                   | -0.019 | 0.987 | 9.13E-01 | 9.13E+01 |  |  |
| 7959354 | NM_020993     | BCL7A        | B-cell CLL/lymphoma 7A                | -0.041 | 0.972 | 8.12E-01 | 8.12E+01 |  |  |
| 7959361 | NM_014938     | MLXIP        | MLX interacting protein               | 0.056  | 1.040 | 7.76E-01 | 7.76E+01 |  |  |
| 7959402 | NM_030765     | B3GNT4       | UDP-GlcNAc:betaGal beta-1,3-N-a       | -0.006 | 0.996 | 9.74E-01 | 9.74E+01 |  |  |
| 7959473 | NM_003677     | DENR         | density-regulated protein             | 0.062  | 1.044 | 4.29E-01 | 4.29E+01 |  |  |
| 7959484 | NM_201435     | CCDC62       | coiled-coil domain containing 62      | -0.016 | 0.989 | 9.56E-01 | 9.56E+01 |  |  |
| 7959500 | NM_003959     | HIP1R        | huntingtin interacting protein 1 re   | -0.059 | 0.960 | 5.23E-01 | 5.23E+01 |  |  |
| 7959535 | NM_024623     | OGFOD2       | 2-oxoglutarate and iron-depende       | -0.020 | 0.986 | 8.97E-01 | 8.97E+01 |  |  |
| 7959549 | NM_00100225   | ARL6IP4      | ADP-ribosylation-like factor 6 inte   | 0.026  | 1.018 | 8.58E-01 | 8.58E+01 |  |  |
| 7959563 | NM_152269     | C12orf65     | chromosome 12 open reading fram       | -0.079 | 0.947 | 4.41E-01 | 4.41E+01 |  |  |
| 7959574 | NM_020382     | SETD8        | SET domain containing (lysine met     | 0.053  | 1.038 | 6.98E-01 | 6.98E+01 |  |  |
| 7959586 | NM_180699     | SNRNP35      | small nuclear ribonucleoprotein 35    | 0.012  | 1.009 | 9.63E-01 | 9.63E+01 |  |  |
| 7959597 | NM_006815     | TMED2        | transmembrane emp24 domain tr         | 0.104  | 1.075 | 1.49E-01 | 1.49E+01 |  |  |
| 7959604 | NM_020936     | DDX55        | DEAD (Asp-Glu-Ala-Asp) box polyp      | 0.006  | 1.004 | 9.80E-01 | 9.80E+01 |  |  |
| 7959621 | ---           | ---          | ---                                   | -0.018 | 0.988 | 9.27E-01 | 9.27E+01 |  |  |
| 7959623 | NM_001516     | GTF2H3       | general transcription factor IIH, po  | 0.126  | 1.091 | 4.82E-01 | 4.82E+01 |  |  |
| 7959638 | NM_024809     | TCTN2        | tectonic family member 2              | -0.114 | 0.924 | 5.34E-01 | 5.34E+01 |  |  |



|         |                           |                                 |                                      |        |       |          |          |  |  |
|---------|---------------------------|---------------------------------|--------------------------------------|--------|-------|----------|----------|--|--|
| 7959657 | NM_012463                 | ATP6V0A2                        | ATPase, H+ transporting, lysosomal   | 0.085  | 1.060 | 3.69E-01 | 3.69E+01 |  |  |
| 7959696 | NM_207437                 | DNAH10                          | dynein, axonemal, heavy chain 10     | 0.014  | 1.010 | 9.02E-01 | 9.02E+01 |  |  |
| 7959751 | NM_152437                 | ZNF664                          | zinc finger protein 664              | -0.059 | 0.960 | 4.25E-01 | 4.25E+01 |  |  |
| 7959761 | NM_181709                 | FAM101A                         | family with sequence similarity 10   | -0.077 | 0.948 | 3.41E-01 | 3.41E+01 |  |  |
| 7959772 | NM_006312                 | NCOR2                           | nuclear receptor co-repressor 2      | -0.019 | 0.987 | 9.51E-01 | 9.51E+01 |  |  |
| 7959777 | NM_080626                 | BRI3BP                          | BRI3 binding protein                 | 0.025  | 1.017 | 8.64E-01 | 8.64E+01 |  |  |
| 7959786 | NM_023928                 | AACS                            | acetoacetyl-CoA synthetase           | -0.011 | 0.992 | 9.73E-01 | 9.73E+01 |  |  |
| 7959827 | NM_00113610               | TMEM132C                        | transmembrane protein 132C           | -0.011 | 0.993 | 9.56E-01 | 9.56E+01 |  |  |
| 7959834 | NM_144669                 | GLT1D1                          | glycosyltransferase 1 domain cont    | 0.063  | 1.045 | 9.02E-01 | 9.02E+01 |  |  |
| 7959848 | ---                       | ---                             | ---                                  | 0.010  | 1.007 | 9.62E-01 | 9.62E+01 |  |  |
| 7959850 | NM_007197                 | FZD10                           | frizzled homolog 10 (Drosophila)     | -0.066 | 0.955 | 5.05E-01 | 5.05E+01 |  |  |
| 7959880 | ---                       | ---                             | ---                                  | -0.094 | 0.937 | 5.15E-01 | 5.15E+01 |  |  |
| 7959882 | NM_006325                 | RAN                             | RAN, member RAS oncogene fami        | -0.025 | 0.983 | 8.65E-01 | 8.65E+01 |  |  |
| 7959891 | ---                       | ---                             | ---                                  | 0.039  | 1.028 | 8.84E-01 | 8.84E+01 |  |  |
| 7959921 | AK098523                  | LOC338797                       | hypothetical LOC338797               | -0.090 | 0.940 | 3.09E-01 | 3.09E+01 |  |  |
| 7959927 | NM_004592                 | SFRS8                           | splicing factor, arginine/serine-ric | -0.051 | 0.965 | 6.18E-01 | 6.18E+01 |  |  |
| 7959946 | NM_016155                 | MMP17                           | matrix metalloproteinase 17 (mem     | -0.055 | 0.962 | 6.48E-01 | 6.48E+01 |  |  |
| 7959957 | NM_003565                 | ULK1                            | unc-51-like kinase 1 (C. elegans)    | -0.039 | 0.973 | 7.81E-01 | 7.81E+01 |  |  |
| 7959986 | NM_025215                 | PUS1                            | pseudouridylate synthase 1           | -0.037 | 0.974 | 8.08E-01 | 8.08E+01 |  |  |
| 7959995 | NM_015409                 | EP400                           | E1A binding protein p400             | -0.035 | 0.976 | 6.76E-01 | 6.76E+01 |  |  |
| 7960054 | NR_003290                 | EP400NL                         | EP400 N-terminal like                | -0.005 | 0.996 | 9.81E-01 | 9.81E+01 |  |  |
| 7960068 | NM_024078                 | NOC4L                           | nucleolar complex associated 4 ho    | 0.089  | 1.064 | 3.44E-01 | 3.44E+01 |  |  |
| 7960088 | NM_00114264               | FBRSL1                          | fibrosin-like 1                      | -0.059 | 0.960 | 6.33E-01 | 6.33E+01 |  |  |
| 7960099 | NM_170683                 | P2RX2                           | purinergic receptor P2X, ligand-ga   | -0.002 | 0.999 | 9.88E-01 | 9.88E+01 |  |  |
| 7960117 | NM_018663                 | PXMP2                           | peroxisomal membrane protein 2,      | 0.005  | 1.004 | 9.83E-01 | 9.83E+01 |  |  |
| 7960124 | NM_138575                 | PGAM5                           | phosphoglycerate mutase family r     | -0.004 | 0.997 | 9.84E-01 | 9.84E+01 |  |  |
| 7960131 | ---                       | ---                             | ---                                  | -0.008 | 0.994 | 9.53E-01 | 9.53E+01 |  |  |
| 7960134 | NM_019591                 | ZNF26                           | zinc finger protein 26               | 0.026  | 1.018 | 9.22E-01 | 9.22E+01 |  |  |
| 7960143 | NM_003428                 | ZNF84                           | zinc finger protein 84               | -0.002 | 0.999 | 9.93E-01 | 9.93E+01 |  |  |
| 7960165 | NM_003415                 | ZNF268                          | zinc finger protein 268              | -0.045 | 0.969 | 7.63E-01 | 7.63E+01 |  |  |
| 7960177 | NM_003044                 | SLC6A12                         | solute carrier family 6 (neurotrans  | 0.046  | 1.032 | 7.98E-01 | 7.98E+01 |  |  |
| 7960221 | NM_005056                 | KDM5A                           | lysine (K)-specific demethylase 5A   | -0.039 | 0.973 | 7.45E-01 | 7.45E+01 |  |  |
| 7960253 | NM_016533                 | NINJ2                           | ninjurin 2                           | -0.010 | 0.993 | 9.53E-01 | 9.53E+01 |  |  |
| 7960259 | ---                       | ---                             | ---                                  | 0.246  | 1.186 | 1.76E-01 | 1.76E+01 |  |  |
| 7960261 | NM_134424                 | RAD52                           | RAD52 homolog (S. cerevisiae)        | -0.100 | 0.933 | 3.64E-01 | 3.64E+01 |  |  |
| 7960280 | NM_152441                 | FBXL14                          | F-box and leucine-rich repeat prot   | -0.084 | 0.943 | 4.84E-01 | 4.84E+01 |  |  |
| 7960283 | NM_172364                 | CACNA2D4                        | calcium channel, voltage-depende     | -0.065 | 0.956 | 3.32E-01 | 3.32E+01 |  |  |
| 7960320 | NM_152640                 | DCP1B                           | DCP1 decapping enzyme homolog        | -0.123 | 0.918 | 2.75E-01 | 2.75E+01 |  |  |
| 7960331 | NM_031474                 | NRIP2                           | nuclear receptor interacting prote   | -0.016 | 0.989 | 9.30E-01 | 9.30E+01 |  |  |
| 7960338 | ---                       | ---                             | ---                                  | -0.031 | 0.979 | 9.01E-01 | 9.01E+01 |  |  |
| 7960357 | ---                       | ---                             | ---                                  | -0.043 | 0.971 | 6.94E-01 | 6.94E+01 |  |  |
| 7960359 | ---                       | ---                             | ---                                  | 0.018  | 1.013 | 9.60E-01 | 9.60E+01 |  |  |
| 7960362 | AY358109                  | UNQ3104                         | ACA3104                              | 0.043  | 1.030 | 7.94E-01 | 7.94E+01 |  |  |
| 7960370 | NM_032680                 | EFCAB4B                         | EF-hand calcium binding domain 4     | 0.017  | 1.012 | 9.40E-01 | 9.40E+01 |  |  |
| 7960381 | CR627161                  | EFCAB4B                         | EF-hand calcium binding domain 4     | 0.052  | 1.037 | 8.08E-01 | 8.08E+01 |  |  |
| 7960397 | NM_020638                 | FGF23                           | fibroblast growth factor 23          | -0.074 | 0.950 | 4.86E-01 | 4.86E+01 |  |  |
| 7960407 | NM_020996                 | FGF6                            | fibroblast growth factor 6           | -0.039 | 0.973 | 7.45E-01 | 7.45E+01 |  |  |
| 7960512 | ---                       | ---                             | ---                                  | -0.063 | 0.957 | 5.65E-01 | 5.65E+01 |  |  |
| 7960518 | NM_001065                 | TNFRSF1A                        | tumor necrosis factor receptor sug   | 0.140  | 1.102 | 4.83E-01 | 4.83E+01 |  |  |
| 7960544 | NM_199245                 | VAMP1                           | vesicle-associated membrane prot     | -0.042 | 0.971 | 8.11E-01 | 8.11E+01 |  |  |
| 7960553 | NM_016497                 | MRPL51                          | mitochondrial ribosomal protein L    | 0.002  | 1.001 | 9.94E-01 | 9.94E+01 |  |  |
| 7960559 | NM_080730                 | IFFO1                           | intermediate filament family orph    | -0.028 | 0.981 | 8.67E-01 | 8.67E+01 |  |  |
| 7960575 | NM_00103371               | NOP2                            | NOP2 nucleolar protein homolog       | -0.088 | 0.941 | 4.10E-01 | 4.10E+01 |  |  |
| 7960594 | NM_001273                 | CHD4                            | chromodomain helicase DNA bind       | -0.129 | 0.915 | 1.35E-01 | 1.35E+01 |  |  |
| 7960635 | NR_003012                 | SCARNA11                        | small Cajal body-specific RNA 11     | 0.041  | 1.029 | 8.04E-01 | 8.04E+01 |  |  |
| 7960637 | NM_020400                 | LPAR5                           | lysophosphatidic acid receptor 5     | -0.002 | 0.998 | 9.91E-01 | 9.91E+01 |  |  |
| 7960642 | NM_032489                 | ACRBP                           | acrosin binding protein              | -0.037 | 0.975 | 7.30E-01 | 7.30E+01 |  |  |
| 7960654 | NM_016162                 | ING4                            | inhibitor of growth family, membe    | 0.029  | 1.021 | 8.62E-01 | 8.62E+01 |  |  |
| 7960666 | NM_133476                 | ZNF384                          | zinc finger protein 384              | -0.082 | 0.945 | 2.01E-01 | 2.01E+01 |  |  |
| 7960682 | AK289648                  | C12orf53                        | chromosome 12 open reading fram      | -0.049 | 0.967 | 6.19E-01 | 6.19E+01 |  |  |
| 7960689 | NR_026581                 | MLF2                            | myeloid leukemia factor 2            | -0.033 | 0.978 | 8.44E-01 | 8.44E+01 |  |  |
| 7960702 | NM_031299                 | CDCA3                           | cell division cycle associated 3     | -0.016 | 0.989 | 9.35E-01 | 9.35E+01 |  |  |
| 7960709 | NM_00114631               | SPSB2                           | splA/ryanodine receptor domain a     | -0.040 | 0.973 | 6.93E-01 | 6.93E+01 |  |  |
| 7960716 | NM_00114483               | PHB2                            | prohibitin 2                         | -0.031 | 0.979 | 8.78E-01 | 8.78E+01 |  |  |
| 7960728 | NR_003010                 | SCARNA12                        | small Cajal body-specific RNA 12     | 0.142  | 1.103 | 4.28E-01 | 4.28E+01 |  |  |
| 7960730 | NM_005768                 | LPCAT3                          | lysophosphatidylcholine acyltrans    | 0.137  | 1.099 | 4.35E-01 | 4.35E+01 |  |  |
| 7960744 | NM_001733                 | C1R                             | complement component 1, r subco      | -0.001 | 0.999 | 9.95E-01 | 9.95E+01 |  |  |
| 7960757 | NM_016546                 | C1RL                            | complement component 1, r subco      | 0.048  | 1.034 | 7.47E-01 | 7.47E+01 |  |  |
| 7960764 | NM_031491                 | RBP5                            | retinol binding protein 5, cellular  | -0.053 | 0.964 | 7.03E-01 | 7.03E+01 |  |  |
| 7960850 | NM_153449                 | SLC2A14                         | solute carrier family 2 (facilitated | -0.120 | 0.920 | 3.48E-01 | 3.48E+01 |  |  |
| 7960863 | ---                       | ---                             | ---                                  | -0.009 | 0.994 | 9.75E-01 | 9.75E+01 |  |  |
| 7960865 | NM_006931                 | SLC2A3                          | solute carrier family 2 (facilitated | -0.167 | 0.891 | 1.24E-01 | 1.24E+01 |  |  |
| 7960874 | NM_004054                 | C3AR1                           | complement component 3a recep        | 0.751  | 1.683 | 1.79E-01 | 1.79E+01 |  |  |
| 7960878 | AF268617 // 5F1P3 // POU5 | POU class 5 homeobox 1 pseudoge |                                      | -0.046 | 0.968 | 8.02E-01 | 8.02E+01 |  |  |
| 7960881 | NM_018088                 | FAM90A1                         | family with sequence similarity 90   | 0.031  | 1.022 | 8.08E-01 | 8.08E+01 |  |  |
| 7960889 | NR_024254                 | LOC653113                       | family with sequence similarity 86   | -0.054 | 0.963 | 8.01E-01 | 8.01E+01 |  |  |
| 7960894 | NR_024420                 | LOC389634                       | hypothetical LOC389634               | -0.049 | 0.967 | 6.36E-01 | 6.36E+01 |  |  |

|         |              |           |                                        |        |       |          |          |  |  |
|---------|--------------|-----------|----------------------------------------|--------|-------|----------|----------|--|--|
| 7960896 | NM_00104007  | LOC650293 | seven transmembrane helix recep        | 0.037  | 1.026 | 9.08E-01 | 9.08E+01 |  |  |
| 7960898 | ---          | ---       | ---                                    | 0.060  | 1.042 | 7.56E-01 | 7.56E+01 |  |  |
| 7960900 | NM_014358    | CLEC4E    | C-type lectin domain family 4, me      | 0.064  | 1.046 | 9.53E-01 | 9.53E+01 |  |  |
| 7960933 | NM_002355    | M6PR      | mannose-6-phosphate receptor (c        | 0.268  | 1.204 | 5.80E-02 | 5.80E+00 |  |  |
| 7960947 | NM_000014    | A2M       | alpha-2-macroglobulin                  | 0.200  | 1.148 | 6.30E-01 | 6.30E+01 |  |  |
| 7960984 | NM_002864    | PZP       | pregnancy-zone protein                 | 0.165  | 1.121 | 6.58E-01 | 6.58E+01 |  |  |
| 7961022 | BC051265     | PTMA      | prothymosin, alpha                     | -0.003 | 0.998 | 9.86E-01 | 9.86E+01 |  |  |
| 7961031 | NM_004400    | DDX12     | DEAD/H (Asp-Glu-Ala-Asp/His) box       | -0.001 | 0.999 | 9.97E-01 | 9.97E+01 |  |  |
| 7961075 | NM_001781    | CD69      | CD69 molecule                          | -0.266 | 0.832 | 1.17E-01 | 1.17E+01 |  |  |
| 7961083 | NM_005127    | CLEC2B    | C-type lectin domain family 2, me      | 0.068  | 1.048 | 7.51E-01 | 7.51E+01 |  |  |
| 7961142 | NM_002543    | OLR1      | oxidized low density lipoprotein (L    | 0.268  | 1.205 | 7.86E-01 | 7.86E+01 |  |  |
| 7961151 | NM_007360    | KLRK1     | killer cell lectin-like receptor subfa | 0.029  | 1.021 | 9.24E-01 | 9.24E+01 |  |  |
| 7961166 | NM_013431    | KLRC4     | killer cell lectin-like receptor subfa | 0.056  | 1.040 | 9.43E-01 | 9.43E+01 |  |  |
| 7961173 | ---          | ---       | ---                                    | -0.003 | 0.998 | 9.97E-01 | 9.97E+01 |  |  |
| 7961175 | NM_002261    | KLRC3     | killer cell lectin-like receptor subfa | 0.045  | 1.032 | 9.61E-01 | 9.61E+01 |  |  |
| 7961182 | NM_002260    | KLRC2     | killer cell lectin-like receptor subfa | -0.025 | 0.983 | 9.81E-01 | 9.81E+01 |  |  |
| 7961187 | NM_002259    | KLRC1     | killer cell lectin-like receptor subfa | -0.027 | 0.982 | 9.73E-01 | 9.73E+01 |  |  |
| 7961208 | NM_018048    | MAGOHB    | mag-nashi homolog B (Drosophila)       | 0.002  | 1.001 | 9.96E-01 | 9.96E+01 |  |  |
| 7961230 | NM_003651    | CSDA      | cold shock domain protein A            | 0.152  | 1.111 | 5.08E-01 | 5.08E+01 |  |  |
| 7961252 | NM_007244    | PRR4      | proline rich 4 (lacrima)               | 0.011  | 1.008 | 9.65E-01 | 9.65E+01 |  |  |
| 7961269 | NM_002723    | PRB4      | proline-rich protein BstNI subfam      | 0.032  | 1.022 | 8.62E-01 | 8.62E+01 |  |  |
| 7961285 | NM_176889    | TAS2R20   | taste receptor, type 2, member 20      | 0.045  | 1.032 | 9.13E-01 | 9.13E+01 |  |  |
| 7961293 | NM_176887    | TAS2R46   | taste receptor, type 2, member 46      | -0.036 | 0.976 | 9.56E-01 | 9.56E+01 |  |  |
| 7961300 | NM_006249    | PRB3      | proline-rich protein BstNI subfam      | -0.033 | 0.977 | 7.57E-01 | 7.57E+01 |  |  |
| 7961306 | NM_005039    | PRB1      | proline-rich protein BstNI subfam      | 0.011  | 1.007 | 9.57E-01 | 9.57E+01 |  |  |
| 7961320 | NM_006248    | PRB2      | proline-rich protein BstNI subfam      | 0.020  | 1.014 | 9.00E-01 | 9.00E+01 |  |  |
| 7961339 | NM_002336    | LRP6      | low density lipoprotein receptor-r     | 0.100  | 1.071 | 7.54E-01 | 7.54E+01 |  |  |
| 7961363 | ---          | ---       | ---                                    | -0.059 | 0.960 | 7.17E-01 | 7.17E+01 |  |  |
| 7961371 | NM_030640    | DUSP16    | dual specificity phosphatase 16        | -0.182 | 0.881 | 9.22E-02 | 9.22E+00 |  |  |
| 7961390 | NM_015987    | HEBP1     | heme binding protein 1                 | 0.163  | 1.119 | 4.34E-01 | 4.34E+01 |  |  |
| 7961453 | ---          | ---       | ---                                    | 0.055  | 1.039 | 7.44E-01 | 7.44E+01 |  |  |
| 7961483 | NM_175054    | HIST4H4   | histone cluster 4, H4                  | 0.130  | 1.095 | 5.40E-01 | 5.40E+01 |  |  |
| 7961489 | NM_016312    | WBP11     | WW domain binding protein 11           | -0.077 | 0.948 | 4.61E-01 | 4.61E+01 |  |  |
| 7961532 | NM_001175    | ARHGDIB   | Rho GDP dissociation inhibitor (GD     | 0.082  | 1.059 | 1.88E-01 | 1.88E+01 |  |  |
| 7961569 | ---          | ---       | ---                                    | 0.026  | 1.018 | 9.12E-01 | 9.12E+01 |  |  |
| 7961654 | NM_002907    | RECQL     | RecQ protein-like (DNA helicase Q      | 0.099  | 1.071 | 2.72E-01 | 2.72E+01 |  |  |
| 7961693 | NM_002300    | LDHB      | lactate dehydrogenase B                | -0.008 | 0.995 | 9.77E-01 | 9.77E+01 |  |  |
| 7961757 | NM_003034    | ST8SIA1   | ST8 alpha-N-acetyl-neuraminide a       | -0.087 | 0.942 | 8.69E-01 | 8.69E+01 |  |  |
| 7961767 | AK295862     | KIAA0528  | KIAA0528                               | 0.137  | 1.100 | 1.97E-01 | 1.97E+01 |  |  |
| 7961820 | ENST00000358 | C12orf67  | chromosome 12 open reading fram        | 0.052  | 1.037 | 7.08E-01 | 7.08E+01 |  |  |
| 7961865 | NM_033360    | KRAS      | v-Ki-ras2 Kirsten rat sarcoma viral    | -0.108 | 0.928 | 1.94E-01 | 1.94E+01 |  |  |
| 7961887 | ---          | ---       | ---                                    | 0.054  | 1.038 | 6.37E-01 | 6.37E+01 |  |  |
| 7961889 | ---          | ---       | ---                                    | -0.070 | 0.952 | 5.82E-01 | 5.82E+01 |  |  |
| 7961900 | NM_002223    | ITPR2     | inositol 1,4,5-triphosphate recept     | 0.163  | 1.119 | 2.65E-01 | 2.65E+01 |  |  |
| 7961960 | ---          | ---       | ---                                    | 0.209  | 1.156 | 6.93E-01 | 6.93E+01 |  |  |
| 7961962 | ---          | ---       | ---                                    | 0.227  | 1.170 | 4.62E-01 | 4.62E+01 |  |  |
| 7961983 | NM_016551    | TM7SF3    | transmembrane 7 superfamily me         | 0.163  | 1.119 | 7.78E-02 | 7.78E+00 |  |  |
| 7961998 | ---          | ---       | ---                                    | 0.046  | 1.032 | 8.15E-01 | 8.15E+01 |  |  |
| 7962013 | NM_016570    | ERGIC2    | ERGIC and golgi 2                      | 0.035  | 1.025 | 8.67E-01 | 8.67E+01 |  |  |
| 7962083 | ---          | ---       | ---                                    | -0.021 | 0.986 | 8.88E-01 | 8.88E+01 |  |  |
| 7962085 | NM_006390    | IPO8      | importin 8                             | -0.021 | 0.985 | 9.24E-01 | 9.24E+01 |  |  |
| 7962112 | NM_00100225  | CAPRIN2   | caprin family member 2                 | -0.146 | 0.903 | 2.37E-01 | 2.37E+01 |  |  |
| 7962146 | NM_00113581  | FAM60A    | family with sequence similarity 60     | -0.288 | 0.819 | 6.20E-02 | 6.20E+00 |  |  |
| 7962151 | NM_144973    | DENND5B   | DENN/MADD domain containing 5          | 0.221  | 1.166 | 1.63E-01 | 1.63E+01 |  |  |
| 7962185 | NR_004854    | AMN1      | antagonist of mitotic exit network     | -0.048 | 0.967 | 8.33E-01 | 8.33E+01 |  |  |
| 7962194 | NM_00101369  | H3F3C     | H3 histone, family 3C                  | -0.026 | 0.982 | 9.30E-01 | 9.30E+01 |  |  |
| 7962197 | ---          | ---       | ---                                    | -0.192 | 0.875 | 7.27E-01 | 7.27E+01 |  |  |
| 7962212 | NM_004572    | PKP2      | plakophilin 2                          | 0.043  | 1.030 | 7.25E-01 | 7.25E+01 |  |  |
| 7962226 | NM_198992    | SYT10     | synaptotagmin X                        | -0.008 | 0.995 | 9.65E-01 | 9.65E+01 |  |  |
| 7962238 | ---          | ---       | ---                                    | -0.021 | 0.985 | 8.49E-01 | 8.49E+01 |  |  |
| 7962240 | ---          | ---       | ---                                    | -0.029 | 0.980 | 8.67E-01 | 8.67E+01 |  |  |
| 7962312 | NM_005164    | ABCD2     | ATP-binding cassette, sub-family D     | 0.201  | 1.150 | 3.72E-01 | 3.72E+01 |  |  |
| 7962327 | NM_052885    | SLC2A13   | solute carrier family 2 (facilitated t | 0.023  | 1.016 | 9.12E-01 | 9.12E+01 |  |  |
| 7962349 | NM_173601    | GLT8D3    | glycosyltransferase 8 domain cont      | -0.028 | 0.981 | 9.11E-01 | 9.11E+01 |  |  |
| 7962358 | NM_005748    | YAF2      | YY1 associated factor 2                | -0.019 | 0.987 | 9.44E-01 | 9.44E+01 |  |  |
| 7962367 | NM_033114    | ZCRB1     | zinc finger CCHC-type and RNA bin      | 0.079  | 1.056 | 6.20E-01 | 6.20E+01 |  |  |
| 7962375 | NM_153026    | PRICKLE1  | prickle homolog 1 (Drosophila)         | 0.144  | 1.105 | 2.37E-01 | 2.37E+01 |  |  |
| 7962441 | NM_002822    | TWF1      | twinfilin, actin-binding protein, ho   | 0.028  | 1.019 | 8.87E-01 | 8.87E+01 |  |  |
| 7962455 | NM_006159    | NELL2     | NEL-like 2 (chicken)                   | -0.274 | 0.827 | 4.03E-01 | 4.03E+01 |  |  |
| 7962489 | NM_015899    | PLEKHA9   | pleckstrin homology domain conta       | 0.019  | 1.013 | 9.55E-01 | 9.55E+01 |  |  |
| 7962499 | NM_004719    | SFRS2IP   | splicing factor, arginine/serine-ric   | 0.064  | 1.046 | 5.11E-01 | 5.11E+01 |  |  |
| 7962516 | NM_030674    | SLC38A1   | solute carrier family 38, member 1     | -0.149 | 0.902 | 1.17E-01 | 1.17E+01 |  |  |
| 7962537 | NM_018976    | SLC38A2   | solute carrier family 38, member 2     | -0.058 | 0.961 | 6.23E-01 | 6.23E+01 |  |  |
| 7962557 | ---          | ---       | ---                                    | 0.069  | 1.049 | 8.10E-01 | 8.10E+01 |  |  |
| 7962579 | NM_00114366  | AMIGO2    | adhesion molecule with Ig-like do      | 0.014  | 1.010 | 9.49E-01 | 9.49E+01 |  |  |
| 7962590 | NM_024604    | RPAP3     | RNA polymerase II associated prot      | 0.110  | 1.079 | 3.67E-01 | 3.67E+01 |  |  |
| 7962623 | NM_00109853  | RAPGEF3   | Rap guanine nucleotide exchange        | 0.026  | 1.018 | 8.88E-01 | 8.88E+01 |  |  |

|         |             |           |                                      |        |       |          |          |  |
|---------|-------------|-----------|--------------------------------------|--------|-------|----------|----------|--|
| 7962625 | NM_00109853 | RAPGEF3   | Rap guanine nucleotide exchange      | -0.070 | 0.952 | 3.51E-01 | 3.51E+01 |  |
| 7962659 | NM_015401   | HDAC7     | histone deacetylase 7                | -0.004 | 0.997 | 9.82E-01 | 9.82E+01 |  |
| 7962689 | NM_00101753 | VDR       | vitamin D (1,25- dihydroxyvitamin    | -0.005 | 0.996 | 9.87E-01 | 9.87E+01 |  |
| 7962703 | NM_001844   | COL2A1    | collagen, type II, alpha 1           | 0.040  | 1.028 | 5.98E-01 | 5.98E+01 |  |
| 7962760 | NM_014554   | SEN1      | SUMO1/sentrin specific peptidase     | -0.102 | 0.932 | 4.44E-01 | 4.44E+01 |  |
| 7962783 | NM_024095   | ASB8      | ankyrin repeat and SOCS box-cont     | 0.012  | 1.008 | 9.63E-01 | 9.63E+01 |  |
| 7962792 | NM_00100413 | OR10AD1   | olfactory receptor, family 10, subf  | 0.099  | 1.071 | 7.53E-01 | 7.53E+01 |  |
| 7962794 | NM_152320   | ZNF641    | zinc finger protein 641              | 0.119  | 1.086 | 2.92E-01 | 2.92E+01 |  |
| 7962811 | NM_017822   | C12orf41  | chromosome 12 open reading fram      | -0.069 | 0.953 | 6.39E-01 | 6.39E+01 |  |
| 7962831 | NM_001240   | CCNT1     | cyclin T1                            | -0.009 | 0.994 | 9.76E-01 | 9.76E+01 |  |
| 7962842 | NM_015270   | ADCY6     | adenylate cyclase 6                  | -0.054 | 0.963 | 6.10E-01 | 6.10E+01 |  |
| 7962869 | NM_004818   | DDX23     | DEAD (Asp-Glu-Ala-Asp) box polyp     | 0.064  | 1.046 | 6.01E-01 | 6.01E+01 |  |
| 7962884 | NM_014470   | RND1      | Rho family GTPase 1                  | -0.167 | 0.891 | 3.72E-01 | 3.72E+01 |  |
| 7962893 | ---         | ---       | ---                                  | 0.027  | 1.019 | 9.29E-01 | 9.29E+01 |  |
| 7962895 | NM_016594   | FKBP11    | FK506 binding protein 11, 19 kDa     | 0.043  | 1.030 | 8.02E-01 | 8.02E+01 |  |
| 7962904 | NM_001659   | ARF3      | ADP-ribosylation factor 3            | 0.012  | 1.008 | 9.67E-01 | 9.67E+01 |  |
| 7962918 | NM_003394   | WNT10B    | wingless-type MMTV integration s     | -0.085 | 0.943 | 4.32E-01 | 4.32E+01 |  |
| 7962930 | NM_015086   | DDN       | dendrin                              | -0.026 | 0.982 | 8.05E-01 | 8.05E+01 |  |
| 7962935 | NM_212461   | PRKAG1    | protein kinase, AMP-activated, gar   | 0.048  | 1.034 | 7.98E-01 | 7.98E+01 |  |
| 7962951 | NM_003482   | MLL2      | myeloid/lymphoid or mixed-lineag     | -0.019 | 0.987 | 8.66E-01 | 8.66E+01 |  |
| 7963020 | NM_021044   | DHH       | desert hedgehog homolog (Droso       | 0.029  | 1.020 | 8.31E-01 | 8.31E+01 |  |
| 7963024 | NM_018113   | LMBR1L    | limb region 1 homolog (mouse)-lik    | -0.021 | 0.986 | 8.93E-01 | 8.93E+01 |  |
| 7963046 | NM_006082   | TUBA1B    | tubulin, alpha 1b                    | 0.073  | 1.052 | 7.40E-01 | 7.40E+01 |  |
| 7963052 | ---         | ---       | ---                                  | 0.019  | 1.013 | 9.16E-01 | 9.16E+01 |  |
| 7963054 | NM_006009   | TUBA1A    | tubulin, alpha 1a                    | -0.011 | 0.993 | 9.73E-01 | 9.73E+01 |  |
| 7963061 | NM_00100822 | C1QL4     | complement component 1, q subc       | -0.039 | 0.974 | 7.51E-01 | 7.51E+01 |  |
| 7963064 | NM_006337   | MCRS1     | microspherule protein 1              | 0.010  | 1.007 | 9.53E-01 | 9.53E+01 |  |
| 7963092 | NM_175736   | FMNL3     | formin-like 3                        | -0.141 | 0.907 | 2.56E-01 | 2.56E+01 |  |
| 7963121 | NM_00103780 | NCKAP5L   | NCK-associated protein 5-like        | -0.061 | 0.959 | 4.78E-01 | 4.78E+01 |  |
| 7963134 | NM_00103780 | NCKAP5L   | NCK-associated protein 5-like        | 0.024  | 1.017 | 9.16E-01 | 9.16E+01 |  |
| 7963137 | ---         | ---       | ---                                  | -0.224 | 0.856 | 3.92E-01 | 3.92E+01 |  |
| 7963139 | NM_181708   | BCDIN3D   | BCDIN3 domain containing             | 0.027  | 1.019 | 8.78E-01 | 8.78E+01 |  |
| 7963142 | NM_012306   | FAIM2     | Fas apoptotic inhibitory molecule    | -0.028 | 0.981 | 8.13E-01 | 8.13E+01 |  |
| 7963157 | NM_013277   | RACGAP1   | Rac GTPase activating protein 1      | 0.114  | 1.082 | 2.99E-01 | 2.99E+01 |  |
| 7963174 | NM_147190   | LASS5     | LAG1 homolog, ceramide synthase      | 0.002  | 1.002 | 9.92E-01 | 9.92E+01 |  |
| 7963187 | NM_00111354 | LIMA1     | LIM domain and actin binding 1       | 0.094  | 1.067 | 4.05E-01 | 4.05E+01 |  |
| 7963212 | NM_000617   | SLC11A2   | solute carrier family 11 (proton-co  | 0.058  | 1.041 | 8.46E-01 | 8.46E+01 |  |
| 7963235 | NM_030809   | CSRNP2    | cysteine-serine-rich nuclear protei  | -0.009 | 0.994 | 9.73E-01 | 9.73E+01 |  |
| 7963244 | NM_005653   | TFCP2     | transcription factor CP2             | -0.029 | 0.980 | 8.96E-01 | 8.96E+01 |  |
| 7963261 | AK292677    | LOC494150 | prohibitin pseudogene                | 0.117  | 1.084 | 5.35E-01 | 5.35E+01 |  |
| 7963263 | ---         | ---       | ---                                  | 0.016  | 1.011 | 9.64E-01 | 9.64E+01 |  |
| 7963265 | NR_026893   | POU6F1    | POU class 6 homeobox 1               | -0.033 | 0.977 | 7.11E-01 | 7.11E+01 |  |
| 7963280 | NM_00103387 | SMAGP     | small trans-membrane and glycos      | -0.030 | 0.980 | 8.38E-01 | 8.38E+01 |  |
| 7963289 | NM_016293   | BIN2      | bridging integrator 2                | 0.243  | 1.183 | 7.00E-02 | 7.00E+00 |  |
| 7963304 | NM_001971   | CELA1     | chymotrypsin-like elastase family,   | 0.089  | 1.063 | 3.29E-01 | 3.29E+01 |  |
| 7963313 | NM_007210   | GALNT6    | UDP-N-acetyl-alpha-D-galactosam      | -0.140 | 0.908 | 1.01E-01 | 1.01E+01 |  |
| 7963328 | NM_00101369 | FIGNL2    | fidgetin-like 2                      | -0.162 | 0.894 | 2.78E-01 | 2.78E+01 |  |
| 7963353 | NM_002281   | KRT81     | keratin 81                           | -0.050 | 0.966 | 8.13E-01 | 8.13E+01 |  |
| 7963359 | NM_002282   | KRT83     | keratin 83                           | -0.062 | 0.958 | 5.93E-01 | 5.93E+01 |  |
| 7963366 | NM_002283   | KRT85     | keratin 85                           | -0.017 | 0.988 | 9.06E-01 | 9.06E+01 |  |
| 7963375 | NM_033045   | KRT84     | keratin 84                           | 0.022  | 1.015 | 9.00E-01 | 9.00E+01 |  |
| 7963406 | NM_005555   | KRT6B     | keratin 6B                           | -0.182 | 0.881 | 2.88E-01 | 2.88E+01 |  |
| 7963410 | NM_173086   | KRT6C     | keratin 6C                           | -0.041 | 0.972 | 7.14E-01 | 7.14E+01 |  |
| 7963421 | NM_005554   | KRT6A     | keratin 6A                           | 0.013  | 1.009 | 9.75E-01 | 9.75E+01 |  |
| 7963438 | NM_033448   | KRT71     | keratin 71                           | -0.067 | 0.955 | 6.39E-01 | 6.39E+01 |  |
| 7963459 | NM_080747   | KRT72     | keratin 72                           | 0.114  | 1.082 | 4.02E-01 | 4.02E+01 |  |
| 7963502 | NM_175078   | KRT77     | keratin 77                           | 0.006  | 1.004 | 9.74E-01 | 9.74E+01 |  |
| 7963513 | NM_015848   | KRT76     | keratin 76                           | -0.014 | 0.990 | 9.53E-01 | 9.53E+01 |  |
| 7963534 | NM_002272   | KRT4      | keratin 4                            | -0.052 | 0.965 | 5.81E-01 | 5.81E+01 |  |
| 7963545 | NM_175834   | KRT79     | keratin 79                           | -0.073 | 0.950 | 4.32E-01 | 4.32E+01 |  |
| 7963555 | NM_173352   | KRT78     | keratin 78                           | -0.024 | 0.984 | 8.56E-01 | 8.56E+01 |  |
| 7963567 | NM_002273   | KRT8      | keratin 8                            | -0.019 | 0.987 | 9.27E-01 | 9.27E+01 |  |
| 7963575 | NM_001417   | EIF4B     | eukaryotic translation initiation fa | 0.050  | 1.035 | 7.93E-01 | 7.93E+01 |  |
| 7963577 | NM_032840   | SPRYD3    | SPRY domain containing 3             | -0.019 | 0.987 | 9.24E-01 | 9.24E+01 |  |
| 7963590 | NM_015989   | CSAD      | cysteine sulfinic acid decarboxylas  | 0.031  | 1.022 | 8.31E-01 | 8.31E+01 |  |
| 7963614 | NM_000889   | ITGB7     | integrin, beta 7                     | 0.093  | 1.067 | 3.39E-01 | 3.39E+01 |  |
| 7963631 | NM_000966   | RARG      | retinoic acid receptor, gamma        | -0.067 | 0.955 | 5.87E-01 | 5.87E+01 |  |
| 7963646 | NM_015665   | AAS       | achalasia, adrenocortical insufficie | -0.059 | 0.960 | 7.31E-01 | 7.31E+01 |  |
| 7963664 | NM_152860   | SP7       | Sp7 transcription factor             | -0.011 | 0.992 | 9.53E-01 | 9.53E+01 |  |
| 7963670 | NM_006301   | MAP3K12   | mitogen-activated protein kinase t   | -0.014 | 0.990 | 9.24E-01 | 9.24E+01 |  |
| 7963689 | NM_003717   | NPFF      | neuropeptide FF-amide peptide pr     | 0.067  | 1.048 | 7.93E-01 | 7.93E+01 |  |
| 7963698 | NM_00113005 | ATF7      | activating transcription factor 7    | 0.036  | 1.025 | 8.52E-01 | 8.52E+01 |  |
| 7963713 | NM_005176   | ATP5G2    | ATP synthase, H+ transporting, mi    | 0.037  | 1.026 | 7.36E-01 | 7.36E+01 |  |
| 7963721 | NM_020898   | CALCOCO1  | calcium binding and coiled-coil do   | -0.083 | 0.944 | 4.11E-01 | 4.11E+01 |  |
| 7963741 | NM_014311   | SMUG1     | single-strand-selective monofunct    | 0.046  | 1.032 | 7.90E-01 | 7.90E+01 |  |
| 7963750 | NM_012117   | CBX5      | chromobox homolog 5 (HP1 alpha       | -0.025 | 0.983 | 8.80E-01 | 8.80E+01 |  |
| 7963774 | NM_015481   | ZNF385A   | zinc finger protein 385A             | 0.102  | 1.073 | 5.10E-01 | 5.10E+01 |  |

|         |              |              |                                      |        |       |          |          |  |  |
|---------|--------------|--------------|--------------------------------------|--------|-------|----------|----------|--|--|
| 7963786 | NM_002205    | ITGA5        | integrin, alpha 5 (fibronectin recep | -0.194 | 0.874 | 1.02E-01 | 1.02E+01 |  |  |
| 7963817 | NM_144594    | GTSF1        | gametocyte specific factor 1         | -0.160 | 0.895 | 6.93E-01 | 6.93E+01 |  |  |
| 7963826 | NM_006741    | PPP1R1A      | protein phosphatase 1, regulatory    | -0.082 | 0.945 | 3.57E-01 | 3.57E+01 |  |  |
| 7963845 | NM_053283    | DCD          | dermcidin                            | 0.015  | 1.011 | 9.01E-01 | 9.01E+01 |  |  |
| 7963851 | NM_00109881  | KIAA0748     | KIAA0748                             | 0.050  | 1.035 | 8.64E-01 | 8.64E+01 |  |  |
| 7963869 | NM_004426    | PHC1         | polyhomeotic homolog 1 (Drosophi     | 0.003  | 1.002 | 9.86E-01 | 9.86E+01 |  |  |
| 7963880 | NM_00114499  | ITGA7        | integrin, alpha 7                    | -0.010 | 0.993 | 9.64E-01 | 9.64E+01 |  |  |
| 7963911 | NM_001780    | CD63         | CD63 molecule                        | 0.166  | 1.122 | 1.88E-01 | 1.88E+01 |  |  |
| 7963923 | NR_026723    | SARNP        | SAP domain containing ribonucleo     | 0.053  | 1.037 | 6.78E-01 | 6.78E+01 |  |  |
| 7963935 | NM_032364    | DNAJC14      | DnaJ (Hsp40) homolog, subfamily      | -0.014 | 0.991 | 9.45E-01 | 9.45E+01 |  |  |
| 7963946 | NM_002429    | MMP19        | matrix metalloproteinase 19          | -0.099 | 0.934 | 8.52E-01 | 8.52E+01 |  |  |
| 7963965 | NM_032345    | WIBG         | within bgcn homolog (Drosophila)     | -0.010 | 0.993 | 9.61E-01 | 9.61E+01 |  |  |
| 7963970 | NM_006928    | SILV         | silver homolog (mouse)               | 0.098  | 1.071 | 4.10E-01 | 4.10E+01 |  |  |
| 7963988 | NM_003075    | SMARCC2      | SWI/SNF related, matrix associate    | -0.082 | 0.945 | 2.26E-01 | 2.26E+01 |  |  |
| 7964021 | NM_194358    | RNF41        | ring finger protein 41               | 0.031  | 1.022 | 8.92E-01 | 8.92E+01 |  |  |
| 7964033 | NM_173595    | ANKRD52      | ankyrin repeat domain 52             | -0.079 | 0.947 | 4.97E-01 | 4.97E+01 |  |  |
| 7964064 | NM_004077    | CS           | citrate synthase                     | 0.025  | 1.017 | 8.56E-01 | 8.56E+01 |  |  |
| 7964076 | NM_014255    | CNPY2        | canopy 2 homolog (zebrafish)         | -0.022 | 0.985 | 8.92E-01 | 8.92E+01 |  |  |
| 7964089 | NM_014871    | PAN2         | PAN2 poly(A) specific ribonuclease   | 0.103  | 1.074 | 3.33E-01 | 3.33E+01 |  |  |
| 7964119 | NM_005419    | STAT2        | signal transducer and activator of   | 0.365  | 1.288 | 6.29E-02 | 6.29E+00 |  |  |
| 7964145 | NM_003920    | TIMELESS     | timeless homolog (Drosophila)        | 0.059  | 1.042 | 7.03E-01 | 7.03E+01 |  |  |
| 7964177 | NM_012064    | MIP          | major intrinsic protein of lens fibe | -0.024 | 0.984 | 9.13E-01 | 9.13E+01 |  |  |
| 7964183 | NM_013267    | GLS2         | glutaminase 2 (liver, mitochondria   | 0.101  | 1.072 | 4.54E-01 | 4.54E+01 |  |  |
| 7964203 | NM_013449    | BAZ2A        | bromodomain adjacent to zinc fin     | 0.016  | 1.011 | 9.01E-01 | 9.01E+01 |  |  |
| 7964234 | NM_001686    | ATP5B        | ATP synthase, H+ transporting, mi    | 0.002  | 1.002 | 9.90E-01 | 9.90E+01 |  |  |
| 7964246 | NR_003046    | SNORD59B     | small nucleolar RNA, C/D box 59B     | 0.066  | 1.047 | 8.84E-01 | 8.84E+01 |  |  |
| 7964250 | NM_006601    | PTGES3       | prostaglandin E synthase 3 (cytos    | 0.040  | 1.028 | 7.13E-01 | 7.13E+01 |  |  |
| 7964260 | ---          | ---          | ---                                  | 0.057  | 1.040 | 8.06E-01 | 8.06E+01 |  |  |
| 7964262 | NM_00111320  | NACA         | nascent polypeptide-associated co    | 0.015  | 1.011 | 8.85E-01 | 8.85E+01 |  |  |
| 7964271 | NM_000946    | PRIM1        | primase, DNA, polypeptide 1 (49k     | 0.044  | 1.031 | 8.74E-01 | 8.74E+01 |  |  |
| 7964300 | NM_014830    | ZBTB39       | zinc finger and BTB domain contai    | -0.001 | 0.999 | 9.97E-01 | 9.97E+01 |  |  |
| 7964360 | NM_003153    | STAT6        | signal transducer and activator of   | 0.040  | 1.028 | 7.94E-01 | 7.94E+01 |  |  |
| 7964388 | NM_020142    | NDUFA4L2     | NADH dehydrogenase (ubiquinone       | -0.062 | 0.958 | 5.22E-01 | 5.22E+01 |  |  |
| 7964400 | NM_145064    | STAC3        | SH3 and cysteine rich domain 3       | -0.025 | 0.983 | 8.43E-01 | 8.43E+01 |  |  |
| 7964413 | NM_014925    | R3HDM2       | R3H domain containing 2              | 0.048  | 1.034 | 5.75E-01 | 5.75E+01 |  |  |
| 7964436 | NM_032496    | ARHGAP9      | Rho GTPase activating protein 9      | 0.012  | 1.008 | 9.58E-01 | 9.58E+01 |  |  |
| 7964460 | NM_004083    | DDIT3        | DNA-damage-inducible transcript      | -0.043 | 0.970 | 8.41E-01 | 8.41E+01 |  |  |
| 7964466 | NM_006400    | DCTN2        | dynactin 2 (p50)                     | -0.093 | 0.938 | 5.43E-01 | 5.43E+01 |  |  |
| 7964484 | NM_001478    | B4GALNT1     | beta-1,4-N-acetyl-galactosaminyl t   | -0.027 | 0.981 | 8.44E-01 | 8.44E+01 |  |  |
| 7964499 | NM_00112277  | AGAP2        | ArfGAP with GTPase domain, anky      | 0.034  | 1.024 | 8.28E-01 | 8.28E+01 |  |  |
| 7964522 | NM_000075    | CDK4         | cyclin-dependent kinase 4            | 0.009  | 1.006 | 9.77E-01 | 9.77E+01 |  |  |
| 7964535 | NM_000785    | CYP27B1      | cytochrome P450, family 27, subfa    | 0.064  | 1.045 | 6.52E-01 | 6.52E+01 |  |  |
| 7964555 | NM_006576    | AVIL         | advillin                             | -0.175 | 0.886 | 4.13E-02 | 4.13E+00 |  |  |
| 7964575 | AK022448     | AVIL         | advillin                             | 0.107  | 1.077 | 4.02E-01 | 4.02E+01 |  |  |
| 7964577 | ---          | ---          | ---                                  | 0.020  | 1.014 | 9.53E-01 | 9.53E+01 |  |  |
| 7964579 | NM_005730    | CTDSP2       | CTD (carboxy-terminal domain, RN     | 0.039  | 1.028 | 8.49E-01 | 8.49E+01 |  |  |
| 7964640 | ---          | ---          | ---                                  | 0.329  | 1.256 | 1.11E-01 | 1.11E+01 |  |  |
| 7964642 | BC136288     | C12orf61     | chromosome 12 open reading fram      | -0.080 | 0.946 | 3.17E-01 | 3.17E+01 |  |  |
| 7964646 | NM_020700    | PPM1H        | protein phosphatase 1H (PP2C do      | -0.064 | 0.957 | 5.15E-01 | 5.15E+01 |  |  |
| 7964658 | ---          | ---          | ---                                  | -0.285 | 0.821 | 9.40E-03 | 9.40E-01 |  |  |
| 7964677 | NM_152440    | C12orf66     | chromosome 12 open reading fram      | 0.026  | 1.018 | 8.54E-01 | 8.54E+01 |  |  |
| 7964701 | NM_002076    | GNS          | glucosamine (N-acetyl)-6-sulfatase   | 0.426  | 1.343 | 1.29E-01 | 1.29E+01 |  |  |
| 7964718 | ---          | ---          | ---                                  | -0.338 | 0.791 | 1.82E-01 | 1.82E+01 |  |  |
| 7964739 | NM_032338    | LLPH         | LLP homolog, long-term synaptic f    | 0.041  | 1.029 | 7.30E-01 | 7.30E+01 |  |  |
| 7964745 | NM_016056    | TMBIM4       | transmembrane BAX inhibitor mot      | 0.083  | 1.059 | 5.23E-01 | 5.23E+01 |  |  |
| 7964757 | NM_016836    | RBMS1        | RNA binding motif, single strand     | 0.097  | 1.070 | 7.85E-01 | 7.85E+01 |  |  |
| 7964759 | NM_021150    | GRIP1        | glutamate receptor interacting pr    | 0.027  | 1.019 | 8.82E-01 | 8.82E+01 |  |  |
| 7964810 | NM_017440    | MDM1         | Mdm1 nuclear protein homolog (r      | 0.028  | 1.020 | 8.45E-01 | 8.45E+01 |  |  |
| 7964828 | ---          | ---          | ---                                  | -0.021 | 0.985 | 9.39E-01 | 9.39E+01 |  |  |
| 7964830 | ---          | ---          | ---                                  | 0.040  | 1.028 | 9.04E-01 | 9.04E+01 |  |  |
| 7964832 | ---          | ---          | ---                                  | 0.073  | 1.052 | 6.05E-01 | 6.05E+01 |  |  |
| 7964868 | ENST00000451 | LOC100131613 | PRO1454                              | 0.156  | 1.114 | 3.79E-01 | 3.79E+01 |  |  |
| 7964937 | NM_144982    | ZFC3H1       | zinc finger, C3H1-type containing    | 0.007  | 1.005 | 9.67E-01 | 9.67E+01 |  |  |
| 7964976 | NR_026837    | LOC283392    | hypothetical LOC283392               | -0.046 | 0.969 | 6.58E-01 | 6.58E+01 |  |  |
| 7965022 | NM_007043    | KRR1         | KRR1, small subunit (SSU) process    | 0.030  | 1.021 | 8.62E-01 | 8.62E+01 |  |  |
| 7965038 | ---          | ---          | ---                                  | 0.030  | 1.021 | 8.52E-01 | 8.52E+01 |  |  |
| 7965040 | NM_007350    | PHLDA1       | pleckstrin homology-like domain,     | -0.064 | 0.957 | 7.20E-01 | 7.20E+01 |  |  |
| 7965048 | NM_004537    | NAP1L1       | nucleosome assembly protein 1-li     | -0.021 | 0.986 | 8.89E-01 | 8.89E+01 |  |  |
| 7965064 | NM_020841    | OSBPL8       | oxysterol binding protein-like 8     | -0.255 | 0.838 | 1.03E-02 | 1.03E+00 |  |  |
| 7965090 | NM_001321    | CSR2         | cysteine and glycine-rich protein 2  | -0.122 | 0.919 | 2.94E-01 | 2.94E+01 |  |  |
| 7965094 | NM_203394    | E2F7         | E2F transcription factor 7           | 0.015  | 1.010 | 9.21E-01 | 9.21E+01 |  |  |
| 7965123 | NM_00114388  | PPP1R12A     | protein phosphatase 1, regulatory    | 0.022  | 1.015 | 8.92E-01 | 8.92E+01 |  |  |
| 7965152 | ---          | ---          | ---                                  | -0.026 | 0.982 | 9.09E-01 | 9.09E+01 |  |  |
| 7965200 | NM_014167    | CCDC59       | coiled-coil domain containing 59     | -0.105 | 0.930 | 3.04E-01 | 3.04E+01 |  |  |
| 7965335 | NM_001946    | DUSP6        | dual specificity phosphatase 6       | 0.369  | 1.291 | 1.76E-01 | 1.76E+01 |  |  |
| 7965343 | NM_172240    | WDR51B       | WD repeat domain 51B                 | -0.044 | 0.970 | 8.29E-01 | 8.29E+01 |  |  |
| 7965357 | NM_003774    | GALNT4       | UDP-N-acetyl-alpha-D-galactosam      | 0.032  | 1.023 | 9.19E-01 | 9.19E+01 |  |  |

|         |              |           |                                      |        |       |          |          |  |
|---------|--------------|-----------|--------------------------------------|--------|-------|----------|----------|--|
| 7965359 | NM_00100132  | ATP2B1    | ATPase, Ca++ transporting, plasma    | -0.018 | 0.988 | 9.55E-01 | 9.55E+01 |  |
| 7965423 | NM_001731    | BTG1      | B-cell translocation gene 1, anti-pr | -0.093 | 0.937 | 4.43E-01 | 4.43E+01 |  |
| 7965429 | ---          | ---       | ---                                  | 0.028  | 1.020 | 9.72E-01 | 9.72E+01 |  |
| 7965436 | NM_003566    | EEA1      | early endosome antigen 1             | 0.225  | 1.169 | 1.98E-02 | 1.98E+00 |  |
| 7965467 | ENST00000358 | RPL41     | ribosomal protein L41                | -0.010 | 0.993 | 9.35E-01 | 9.35E+01 |  |
| 7965471 | NM_003348    | UBE2N     | ubiquitin-conjugating enzyme E2N     | 0.083  | 1.059 | 4.77E-01 | 4.77E+01 |  |
| 7965478 | ---          | ---       | ---                                  | 0.027  | 1.019 | 9.22E-01 | 9.22E+01 |  |
| 7965480 | NM_002629    | PGAM1     | phosphoglycerate mutase 1 (brain     | -0.010 | 0.993 | 9.67E-01 | 9.67E+01 |  |
| 7965484 | ---          | ---       | ---                                  | -0.086 | 0.942 | 4.96E-01 | 4.96E+01 |  |
| 7965508 | ---          | ---       | ---                                  | -0.045 | 0.969 | 9.19E-01 | 9.19E+01 |  |
| 7965510 | NM_020698    | TMCC3     | transmembrane and coiled-coil do     | -0.172 | 0.888 | 5.48E-02 | 5.48E+00 |  |
| 7965515 | NM_018838    | NDUFA12   | NADH dehydrogenase (ubiquinone       | -0.043 | 0.971 | 8.92E-01 | 8.92E+01 |  |
| 7965573 | NM_021229    | NTN4      | netrin 4                             | -0.079 | 0.947 | 4.98E-01 | 4.98E+01 |  |
| 7965652 | NM_002595    | PCTK2     | PCTAIRE protein kinase 2             | -0.140 | 0.908 | 1.59E-01 | 1.59E+01 |  |
| 7965673 | ---          | ---       | ---                                  | -0.058 | 0.961 | 5.52E-01 | 5.52E+01 |  |
| 7965675 | ---          | ---       | ---                                  | -0.097 | 0.935 | 5.93E-01 | 5.93E+01 |  |
| 7965723 | NM_015054    | UHRF1BP1L | UHRF1 binding protein 1-like         | -0.058 | 0.961 | 7.18E-01 | 7.18E+01 |  |
| 7965789 | NM_001177    | ARL1      | ADP-ribosylation factor-like 1       | 0.093  | 1.067 | 3.95E-01 | 3.95E+01 |  |
| 7965812 | NM_024312    | GNPTAB    | N-acetylglucosamine-1-phosphate      | 0.079  | 1.056 | 7.45E-01 | 7.45E+01 |  |
| 7965842 | ---          | ---       | ---                                  | 0.115  | 1.083 | 3.79E-01 | 3.79E+01 |  |
| 7965846 | NM_016053    | CCDC53    | coiled-coil domain containing 53     | 0.056  | 1.040 | 8.40E-01 | 8.40E+01 |  |
| 7965855 | NM_024057    | NUP37     | nucleoporin 37kDa                    | 0.097  | 1.069 | 6.14E-01 | 6.14E+01 |  |
| 7965956 | NM_006166    | NFYB      | nuclear transcription factor Y, beta | 0.022  | 1.015 | 9.18E-01 | 9.18E+01 |  |
| 7965976 | ---          | ---       | ---                                  | -0.010 | 0.993 | 9.58E-01 | 9.58E+01 |  |
| 7966003 | NM_018171    | APPL2     | adaptor protein, phosphotyrosine     | 0.023  | 1.016 | 8.87E-01 | 8.87E+01 |  |
| 7966035 | NM_006825    | CKAP4     | cytoskeleton-associated protein 4    | -0.235 | 0.850 | 5.87E-03 | 5.87E-01 |  |
| 7966046 | NM_00103305  | MTERFD3   | MTERF domain containing 3            | 0.058  | 1.041 | 7.57E-01 | 7.57E+01 |  |
| 7966052 | NM_004075    | CRY1      | cryptochrome 1 (photolyase-like)     | -0.117 | 0.922 | 5.84E-01 | 5.84E+01 |  |
| 7966072 | NM_012406    | PRDM4     | PR domain containing 4               | 0.010  | 1.007 | 9.57E-01 | 9.57E+01 |  |
| 7966098 | NM_014706    | SART3     | squamous cell carcinoma antigen      | -0.053 | 0.964 | 6.94E-01 | 6.94E+01 |  |
| 7966122 | NM_181724    | TMEM119   | transmembrane protein 119            | -0.062 | 0.958 | 5.52E-01 | 5.52E+01 |  |
| 7966127 | NM_003006    | SEPLG     | selectin P ligand                    | 0.140  | 1.102 | 3.04E-01 | 3.04E+01 |  |
| 7966135 | NM_014325    | CORO1C    | coronin, actin binding protein, 1C   | 0.402  | 1.321 | 2.37E-01 | 2.37E+01 |  |
| 7966150 | NM_00116133  | SSH1      | slingshot homolog 1 (Drosophila)     | -0.210 | 0.865 | 3.80E-02 | 3.80E+00 |  |
| 7966172 | NM_018711    | SVOP      | SV2 related protein homolog (rat)    | -0.013 | 0.991 | 9.51E-01 | 9.51E+01 |  |
| 7966183 | NM_00114537  | ALKBH2    | alkB, alkylation repair homolog 2 (  | -0.136 | 0.910 | 3.32E-01 | 3.32E+01 |  |
| 7966189 | NM_213596    | FOXN4     | forkhead box N4                      | -0.062 | 0.958 | 3.46E-01 | 3.46E+01 |  |
| 7966202 | NM_031954    | KCTD10    | potassium channel tetramerisation    | 0.035  | 1.025 | 8.48E-01 | 8.48E+01 |  |
| 7966213 | NM_052845    | MMAB      | methylmalonic aciduria (cobalamin    | -0.140 | 0.908 | 1.22E-01 | 1.22E+01 |  |
| 7966223 | ---          | ---       | ---                                  | -0.217 | 0.860 | 5.48E-01 | 5.48E+01 |  |
| 7966234 | NM_021625    | TRPV4     | transient receptor potential cation  | -0.052 | 0.964 | 4.81E-01 | 4.81E+01 |  |
| 7966259 | NM_016433    | GLTP      | glycolipid transfer protein          | -0.092 | 0.938 | 5.59E-01 | 5.59E+01 |  |
| 7966266 | ---          | ---       | ---                                  | 0.050  | 1.035 | 8.55E-01 | 8.55E+01 |  |
| 7966268 | NM_057169    | Git2      | G protein-coupled receptor kinase    | 0.087  | 1.062 | 3.38E-01 | 3.38E+01 |  |
| 7966293 | BC133010     | C12orf76  | chromosome 12 open reading fram      | 0.064  | 1.045 | 6.51E-01 | 6.51E+01 |  |
| 7966299 | ---          | ---       | ---                                  | -0.112 | 0.925 | 4.42E-01 | 4.42E+01 |  |
| 7966301 | NM_016238    | ANAPC7    | anaphase promoting complex sub       | 0.007  | 1.005 | 9.76E-01 | 9.76E+01 |  |
| 7966315 | NM_005719    | ARPC3     | actin related protein 2/3 complex,   | 0.266  | 1.203 | 1.20E-02 | 1.20E+00 |  |
| 7966321 | NM_016301    | GPN3      | GPN-loop GTPase 3                    | 0.090  | 1.064 | 6.42E-01 | 6.42E+01 |  |
| 7966332 | NM_016226    | VPS29     | vacuolar protein sorting 29 homol    | 0.075  | 1.053 | 5.63E-01 | 5.63E+01 |  |
| 7966345 | NM_139283    | PPTC7     | PTC7 protein phosphatase homol       | 0.006  | 1.004 | 9.77E-01 | 9.77E+01 |  |
| 7966356 | NM_00104010  | HVCN1     | hydrogen voltage-gated channel 1     | 0.265  | 1.202 | 1.84E-03 | 1.84E-01 |  |
| 7966368 | NM_002710    | PPP1CC    | protein phosphatase 1, catalytic s   | 0.133  | 1.097 | 1.94E-03 | 1.94E-01 |  |
| 7966389 | NM_144671    | FAM109A   | family with sequence similarity 10   | -0.032 | 0.978 | 7.71E-01 | 7.71E+01 |  |
| 7966397 | NM_002973    | ATXN2     | ataxin 2                             | 0.019  | 1.013 | 9.00E-01 | 9.00E+01 |  |
| 7966427 | NM_006768    | BRAP      | BRCA1 associated protein             | 0.026  | 1.018 | 8.06E-01 | 8.06E+01 |  |
| 7966441 | NR_015404    | C12orf47  | chromosome 12 open reading fram      | 0.020  | 1.014 | 9.55E-01 | 9.55E+01 |  |
| 7966448 | NM_138341    | TMEM116   | transmembrane protein 116            | 0.163  | 1.119 | 3.70E-01 | 3.70E+01 |  |
| 7966462 | NM_024953    | C12orf30  | chromosome 12 open reading fram      | 0.062  | 1.044 | 6.70E-01 | 6.70E+01 |  |
| 7966488 | NM_00110966  | C12orf51  | chromosome 12 open reading fram      | -0.031 | 0.979 | 7.78E-01 | 7.78E+01 |  |
| 7966517 | NM_00110966  | C12orf51  | chromosome 12 open reading fram      | -0.070 | 0.953 | 5.60E-01 | 5.60E+01 |  |
| 7966534 | NM_00102466  | RPL6      | ribosomal protein L6                 | -0.009 | 0.994 | 9.44E-01 | 9.44E+01 |  |
| 7966570 | NM_00111132  | DDX54     | DEAD (Asp-Glu-Ala-Asp) box polyp     | -0.031 | 0.979 | 8.33E-01 | 8.33E+01 |  |
| 7966596 | NM_138451    | IQCD      | IQ motif containing D                | -0.017 | 0.988 | 9.37E-01 | 9.37E+01 |  |
| 7966600 | NM_024959    | SLC24A6   | solute carrier family 24 (sodium/p   | 0.078  | 1.056 | 6.39E-01 | 6.39E+01 |  |
| 7966631 | NM_022363    | LHX5      | LIM homeobox 5                       | -0.056 | 0.962 | 5.85E-01 | 5.85E+01 |  |
| 7966638 | NM_016196    | RBM19     | RNA binding motif protein 19         | -0.028 | 0.981 | 8.32E-01 | 8.32E+01 |  |
| 7966666 | ---          | ---       | ---                                  | -0.062 | 0.958 | 6.89E-01 | 6.89E+01 |  |
| 7966690 | NM_016569    | TBX3      | T-box 3                              | -0.085 | 0.943 | 3.74E-01 | 3.74E+01 |  |
| 7966706 | NM_015335    | MED13L    | mediator complex subunit 13-like     | 0.024  | 1.017 | 8.72E-01 | 8.72E+01 |  |
| 7966738 | AK298857     | C12orf49  | chromosome 12 open reading fram      | 0.060  | 1.042 | 5.60E-01 | 5.60E+01 |  |
| 7966746 | NM_003806    | HRK       | harakiri, BCL2 interacting protein   | -0.094 | 0.937 | 3.85E-01 | 3.85E+01 |  |
| 7966749 | NM_017899    | TESC      | tescalcin                            | 0.029  | 1.020 | 9.00E-01 | 9.00E+01 |  |
| 7966760 | NM_033624    | FBXO21    | F-box protein 21                     | -0.027 | 0.982 | 8.68E-01 | 8.68E+01 |  |
| 7966810 | NM_173598    | KSR2      | kinase suppressor of ras 2           | 0.050  | 1.036 | 6.80E-01 | 6.80E+01 |  |
| 7966829 | NM_018639    | WSB2      | WD repeat and SOCS box-containi      | 0.155  | 1.113 | 3.46E-01 | 3.46E+01 |  |
| 7966839 | NM_019086    | FLJ20674  | hypothetical protein FLJ20674        | -0.048 | 0.967 | 6.57E-01 | 6.57E+01 |  |

|         |              |              |                                      |        |       |          |          |  |  |
|---------|--------------|--------------|--------------------------------------|--------|-------|----------|----------|--|--|
| 7966851 | NM_016281    | TAOK3        | TAO kinase 3                         | 0.097  | 1.069 | 3.60E-01 | 3.60E+01 |  |  |
| 7966876 | ---          | ---          | ---                                  | -0.019 | 0.987 | 9.28E-01 | 9.28E+01 |  |  |
| 7966929 | NM_006861    | RAB35        | RAB35, member RAS oncogene fa        | 0.055  | 1.039 | 8.38E-01 | 8.38E+01 |  |  |
| 7966938 | NM_006836    | GCN1L1       | GCN1 general control of amino-ac     | -0.045 | 0.969 | 6.69E-01 | 6.69E+01 |  |  |
| 7966996 | NM_053275    | RPLP0        | ribosomal protein, large, P0         | -0.132 | 0.912 | 2.78E-01 | 2.78E+01 |  |  |
| 7967002 | NM_00108085  | PXN          | paxillin                             | -0.052 | 0.965 | 4.24E-01 | 4.24E+01 |  |  |
| 7967021 | BC052611     | PXN          | paxillin                             | -0.061 | 0.959 | 6.23E-01 | 6.23E+01 |  |  |
| 7967025 | ---          | ---          | ---                                  | -0.031 | 0.979 | 8.92E-01 | 8.92E+01 |  |  |
| 7967030 | NR_003925    | RNU4-1       | RNA, U4 small nuclear 1              | 0.067  | 1.047 | 8.70E-01 | 8.70E+01 |  |  |
| 7967032 | ---          | ---          | ---                                  | 0.062  | 1.044 | 6.04E-01 | 6.04E+01 |  |  |
| 7967039 | NM_002442    | MSI1         | musashi homolog 1 (Drosophila)       | 0.029  | 1.020 | 7.84E-01 | 7.84E+01 |  |  |
| 7967056 | NM_016399    | TRIAP1       | TP53 regulated inhibitor of apopto   | -0.010 | 0.993 | 9.44E-01 | 9.44E+01 |  |  |
| 7967060 | NM_003769    | SFRS9        | splicing factor, arginine/serine-ric | 0.048  | 1.034 | 5.68E-01 | 5.68E+01 |  |  |
| 7967067 | NM_00103749  | DYNLL1       | dynein, light chain, LC8-type 1      | 0.074  | 1.053 | 6.62E-01 | 6.62E+01 |  |  |
| 7967072 | NM_032314    | COQ5         | coenzyme Q5 homolog, methyltra       | 0.035  | 1.025 | 9.18E-01 | 9.18E+01 |  |  |
| 7967084 | NM_015918    | POP5         | processing of precursor 5, ribonuc   | -0.007 | 0.995 | 9.83E-01 | 9.83E+01 |  |  |
| 7967089 | ---          | ---          | ---                                  | 0.029  | 1.020 | 9.19E-01 | 9.19E+01 |  |  |
| 7967091 | NM_139015    | UNQ1887      | signal peptide peptidase 3           | 0.084  | 1.060 | 4.41E-01 | 4.41E+01 |  |  |
| 7967109 | BC014661     | C12orf43     | chromosome 12 open reading fram      | -0.033 | 0.978 | 8.63E-01 | 8.63E+01 |  |  |
| 7967117 | NM_003733    | OASL         | 2'-5'-oligoadenylate synthetase-lik  | -0.187 | 0.878 | 3.70E-01 | 3.70E+01 |  |  |
| 7967127 | NM_006549    | CAMKK2       | calcium/calmodulin-dependent pr      | 0.143  | 1.104 | 1.75E-01 | 1.75E+01 |  |  |
| 7967149 | NM_016237    | ANAPC5       | anaphase promoting complex sub       | 0.129  | 1.094 | 3.55E-01 | 3.55E+01 |  |  |
| 7967175 | NM_032590    | KDM2B        | lysine (K)-specific demethylase 2B   | 0.000  | 1.000 | 9.98E-01 | 9.98E+01 |  |  |
| 7967193 | NM_173855    | MORN3        | MORN repeat containing 3             | 0.035  | 1.024 | 8.58E-01 | 8.58E+01 |  |  |
| 7967202 | NM_019034    | RHOF         | ras homolog gene family, member      | -0.059 | 0.960 | 6.05E-01 | 6.05E+01 |  |  |
| 7967210 | NR_002809    | LOC338799    | hypothetical LOC338799               | -0.037 | 0.975 | 8.55E-01 | 8.55E+01 |  |  |
| 7967230 | NM_019887    | DIABLO       | diablo homolog (Drosophila)          | -0.005 | 0.997 | 9.85E-01 | 9.85E+01 |  |  |
| 7967240 | NM_022916    | VPS33A       | vacuolar protein sorting 33 homol    | 0.019  | 1.013 | 9.33E-01 | 9.33E+01 |  |  |
| 7967255 | NM_002956    | CLIP1        | CAP-GLY domain containing linker     | -0.065 | 0.956 | 6.46E-01 | 6.46E+01 |  |  |
| 7967287 | NM_017612    | ZCCHC8       | zinc finger, CCHC domain containi    | -0.024 | 0.983 | 9.11E-01 | 9.11E+01 |  |  |
| 7967304 | NM_198261    | RSRC2        | arginine/serine-rich coiled-coil 2   | -0.059 | 0.960 | 6.39E-01 | 6.39E+01 |  |  |
| 7967318 | NM_177551    | NIACR1       | niacin receptor 1                    | -0.098 | 0.934 | 8.31E-01 | 8.31E+01 |  |  |
| 7967331 | NM_024667    | VPS37B       | vacuolar protein sorting 37 homol    | -0.035 | 0.976 | 8.40E-01 | 8.40E+01 |  |  |
| 7967358 | NM_020845    | PITPNM2      | phosphatidylinositol transfer prot   | 0.065  | 1.046 | 6.00E-01 | 6.00E+01 |  |  |
| 7967386 | NM_022782    | MPHOSPH9     | M-phase phosphoprotein 9             | 0.076  | 1.054 | 6.60E-01 | 6.60E+01 |  |  |
| 7967412 | NM_004642    | CDK2AP1      | cyclin-dependent kinase 2 associat   | -0.071 | 0.952 | 4.44E-01 | 4.44E+01 |  |  |
| 7967420 | NM_018183    | SBNO1        | strawberry notch homolog 1 (Dros     | 0.023  | 1.016 | 8.60E-01 | 8.60E+01 |  |  |
| 7967452 | ---          | ---          | ---                                  | 0.022  | 1.015 | 9.71E-01 | 9.71E+01 |  |  |
| 7967456 | NM_145058    | RILPL2       | Rab interacting lysosomal protein-   | -0.279 | 0.824 | 7.11E-02 | 7.11E+00 |  |  |
| 7967463 | NM_178314    | RILPL1       | Rab interacting lysosomal protein-   | -0.044 | 0.970 | 8.23E-01 | 8.23E+01 |  |  |
| 7967473 | NM_001414    | EIF2B1       | eukaryotic translation initiation fa | 0.076  | 1.054 | 7.36E-01 | 7.36E+01 |  |  |
| 7967486 | NM_025140    | CCDC92       | coiled-coil domain containing 92     | -0.063 | 0.957 | 7.52E-01 | 7.52E+01 |  |  |
| 7967493 | NM_006312    | NCOR2        | nuclear receptor co-repressor 2      | -0.033 | 0.977 | 7.09E-01 | 7.09E+01 |  |  |
| 7967544 | NM_005505    | SCARB1       | scavenger receptor class B, memb     | 0.032  | 1.022 | 8.01E-01 | 8.01E+01 |  |  |
| 7967563 | NM_021009    | UBC          | ubiquitin C                          | -0.029 | 0.980 | 8.02E-01 | 8.02E+01 |  |  |
| 7967586 | ---          | ---          | ---                                  | -0.098 | 0.934 | 3.94E-01 | 3.94E+01 |  |  |
| 7967588 | NM_032656    | DHX37        | DEAH (Asp-Glu-Ala-His) box polype    | 0.024  | 1.016 | 8.55E-01 | 8.55E+01 |  |  |
| 7967620 | ---          | ---          | ---                                  | 0.019  | 1.013 | 9.27E-01 | 9.27E+01 |  |  |
| 7967622 | ---          | ---          | ---                                  | -0.010 | 0.993 | 9.76E-01 | 9.76E+01 |  |  |
| 7967624 | NM_145648    | SLC15A4      | solute carrier family 15, member 4   | 0.031  | 1.022 | 9.16E-01 | 9.16E+01 |  |  |
| 7967636 | NR_026666    | MGC16384     | hypothetical LOC114130               | -0.061 | 0.959 | 8.97E-01 | 8.97E+01 |  |  |
| 7967641 | NM_133448    | TMEM132D     | transmembrane protein 132D           | -0.057 | 0.961 | 5.64E-01 | 5.64E+01 |  |  |
| 7967660 | NM_015347    | RIMBP2       | RIMS binding protein 2               | 0.009  | 1.006 | 9.63E-01 | 9.63E+01 |  |  |
| 7967685 | NM_194356    | STX2         | syntaxin 2                           | -0.064 | 0.957 | 7.27E-01 | 7.27E+01 |  |  |
| 7967698 | ---          | ---          | ---                                  | 0.040  | 1.028 | 9.09E-01 | 9.09E+01 |  |  |
| 7967700 | ENST00000415 | LOC100128840 | hypothetical protein LOC1001288      | -0.036 | 0.975 | 7.94E-01 | 7.94E+01 |  |  |
| 7967709 | ---          | ---          | ---                                  | -0.020 | 0.986 | 9.16E-01 | 9.16E+01 |  |  |
| 7967711 | NM_175066    | DDX51        | DEAD (Asp-Glu-Ala-Asp) box polyp     | -0.059 | 0.960 | 5.15E-01 | 5.15E+01 |  |  |
| 7967727 | NM_021808    | GALNT9       | UDP-N-acetyl-alpha-D-galactosam      | -0.060 | 0.959 | 5.56E-01 | 5.56E+01 |  |  |
| 7967736 | NM_006231    | POLE         | polymerase (DNA directed), epsilon   | 0.033  | 1.023 | 7.68E-01 | 7.68E+01 |  |  |
| 7967789 | NM_018663    | PXMP2        | peroxisomal membrane protein 2,      | -0.013 | 0.991 | 9.44E-01 | 9.44E+01 |  |  |
| 7967792 | ---          | ---          | ---                                  | 0.030  | 1.021 | 9.30E-01 | 9.30E+01 |  |  |
| 7967794 | NM_015114    | ANKLE2       | ankyrin repeat and LEM domain co     | -0.138 | 0.909 | 8.58E-02 | 8.58E+00 |  |  |
| 7967810 | NM_005895    | GOLGA3       | golgi autoantigen, golgin subfamili  | -0.029 | 0.980 | 7.58E-01 | 7.58E+01 |  |  |
| 7967841 | NM_00116134  | CHFR         | checkpoint with forkhead and ring    | 0.035  | 1.024 | 8.31E-01 | 8.31E+01 |  |  |
| 7967870 | ---          | ---          | ---                                  | -0.040 | 0.973 | 8.93E-01 | 8.93E+01 |  |  |
| 7967879 | NM_152274    | FAM58A       | family with sequence similarity 58   | 0.014  | 1.010 | 9.53E-01 | 9.53E+01 |  |  |
| 7967881 | NM_017520    | MPHOSPH8     | M-phase phosphoprotein 8             | 0.055  | 1.039 | 6.58E-01 | 6.58E+01 |  |  |
| 7967896 | ENST00000421 | PBRM1        | polybromo 1                          | -0.057 | 0.961 | 8.40E-01 | 8.40E+01 |  |  |
| 7967898 | ---          | ---          | ---                                  | 0.049  | 1.035 | 8.44E-01 | 8.44E+01 |  |  |
| 7967900 | NM_003453    | ZMYM2        | zinc finger, MYM-type 2              | -0.005 | 0.997 | 9.81E-01 | 9.81E+01 |  |  |
| 7967969 | NM_138284    | IL17D        | interleukin 17D                      | -0.047 | 0.968 | 6.59E-01 | 6.59E+01 |  |  |
| 7967976 | NM_005870    | SAP18        | Sin3A-associated protein, 18kDa      | -0.060 | 0.960 | 5.39E-01 | 5.39E+01 |  |  |
| 7967987 | NM_024026    | MRP63        | mitochondrial ribosomal protein 6    | -0.029 | 0.980 | 8.88E-01 | 8.88E+01 |  |  |
| 7968015 | NM_148957    | TNFRSF19     | tumor necrosis factor receptor sug   | -0.069 | 0.953 | 5.50E-01 | 5.50E+01 |  |  |
| 7968035 | NM_153023    | SPATA13      | spermatogenesis associated 13        | -0.082 | 0.945 | 4.27E-01 | 4.27E+01 |  |  |
| 7968126 | NM_002339    | LSP1         | lymphocyte-specific protein 1        | -0.037 | 0.974 | 8.87E-01 | 8.87E+01 |  |  |

|         |                 |            |                                                                         |        |       |          |          |  |
|---------|-----------------|------------|-------------------------------------------------------------------------|--------|-------|----------|----------|--|
| 7968128 | NM_030979       | PABPC3     | poly(A) binding protein, cytoplasmic                                    | -0.017 | 0.988 | 9.24E-01 | 9.24E+01 |  |
| 7968132 | NM_014089       | NUPL1      | nucleoporin like 1                                                      | 0.002  | 1.002 | 9.89E-01 | 9.89E+01 |  |
| 7968199 | NM_001260       | CDK8       | cyclin-dependent kinase 8                                               | 0.018  | 1.013 | 9.51E-01 | 9.51E+01 |  |
| 7968212 | NM_006646       | WASF3      | WAS protein family, member 3                                            | -0.060 | 0.959 | 3.40E-01 | 3.40E+01 |  |
| 7968226 | NM_000982       | RPL21      | ribosomal protein L21                                                   | -0.018 | 0.987 | 9.16E-01 | 9.16E+01 |  |
| 7968232 | NR_002574       | SNORD102   | small nucleolar RNA, C/D box 102                                        | -0.011 | 0.992 | 9.83E-01 | 9.83E+01 |  |
| 7968234 | NR_002575       | SNORA27    | small nucleolar RNA, H/ACA box 2                                        | 0.064  | 1.046 | 8.52E-01 | 8.52E+01 |  |
| 7968242 | NM_002097       | GTF3A      | general transcription factor IIIA                                       | 0.040  | 1.028 | 8.05E-01 | 8.05E+01 |  |
| 7968252 | ---             | ---        | ---                                                                     | 0.051  | 1.036 | 5.67E-01 | 5.67E+01 |  |
| 7968254 | NM_152705       | POLR1D     | polymerase (RNA) I polypeptide D                                        | 0.052  | 1.037 | 7.13E-01 | 7.13E+01 |  |
| 7968260 | NM_145657       | GSX1       | GS homeobox 1                                                           | -0.076 | 0.949 | 4.05E-01 | 4.05E+01 |  |
| 7968265 | NM_000209       | PDX1       | pancreatic and duodenal homeobox 1                                      | -0.028 | 0.981 | 8.37E-01 | 8.37E+01 |  |
| 7968270 | NR_002162       | // ATP5EP2 | // ATP synthase, H+ transporting, mitochondrial F1F0 complex, subunit 2 | 0.250  | 1.189 | 4.17E-03 | 4.17E-01 |  |
| 7968272 | ---             | ---        | ---                                                                     | -0.006 | 0.996 | 9.77E-01 | 9.77E+01 |  |
| 7968274 | NM_175854       | PAN3       | PAN3 poly(A) specific ribonuclease                                      | 0.058  | 1.041 | 6.94E-01 | 6.94E+01 |  |
| 7968295 | ---             | ---        | ---                                                                     | 0.090  | 1.064 | 7.87E-01 | 7.87E+01 |  |
| 7968297 | NM_015932       | POMP       | proteasome maturation protein                                           | 0.057  | 1.041 | 7.56E-01 | 7.56E+01 |  |
| 7968323 | ENST00000400000 | LOC440131  | similar to bA90M5.1 (novel protein)                                     | 0.055  | 1.039 | 5.51E-01 | 5.51E+01 |  |
| 7968329 | ---             | ---        | ---                                                                     | 0.117  | 1.084 | 6.18E-01 | 6.18E+01 |  |
| 7968331 | NM_003347       | UBE2L3     | ubiquitin-conjugating enzyme E2L3                                       | 0.032  | 1.023 | 8.36E-01 | 8.36E+01 |  |
| 7968333 | NM_005800       | USPL1      | ubiquitin specific peptidase like 1                                     | 0.080  | 1.057 | 5.16E-01 | 5.16E+01 |  |
| 7968411 | NR_027062       | EEF1DP3    | eukaryotic translation elongation factor 1D                             | -0.051 | 0.965 | 7.14E-01 | 7.14E+01 |  |
| 7968417 | NM_023037       | FRY        | furry homolog (Drosophila)                                              | 0.035  | 1.025 | 8.78E-01 | 8.78E+01 |  |
| 7968514 | ---             | ---        | ---                                                                     | -0.018 | 0.987 | 9.74E-01 | 9.74E+01 |  |
| 7968516 | NM_015032       | PDS5B      | PDS5, regulator of cohesin maintenance                                  | -0.016 | 0.989 | 9.21E-01 | 9.21E+01 |  |
| 7968563 | NM_002915       | RFC3       | replication factor C (activator 1) 3                                    | 0.188  | 1.139 | 3.51E-01 | 3.51E+01 |  |
| 7968637 | NM_003914       | CCNA1      | cyclin A1                                                               | -0.062 | 0.958 | 6.41E-01 | 6.41E+01 |  |
| 7968650 | NM_203451       | C13orf36   | chromosome 13 open reading frame 36                                     | 0.017  | 1.012 | 9.24E-01 | 9.24E+01 |  |
| 7968658 | NM_181503       | EXOSC8     | exosome component 8                                                     | -0.047 | 0.968 | 8.44E-01 | 8.44E+01 |  |
| 7968670 | NM_016617       | UFM1       | ubiquitin-fold modifier 1                                               | 0.059  | 1.042 | 7.21E-01 | 7.21E+01 |  |
| 7968703 | NM_00101275     | NHLRC3     | NHL repeat containing 3                                                 | 0.190  | 1.141 | 1.40E-01 | 1.40E+01 |  |
| 7968711 | NR_026745       | COG6       | component of oligomeric golgi complex                                   | -0.010 | 0.993 | 9.73E-01 | 9.73E+01 |  |
| 7968734 | NM_014252       | SLC25A15   | solute carrier family 25 (mitochondrial)                                | 0.066  | 1.047 | 7.98E-01 | 7.98E+01 |  |
| 7968759 | ---             | ---        | ---                                                                     | 0.021  | 1.015 | 9.00E-01 | 9.00E+01 |  |
| 7968761 | NM_024561       | NARG1L     | NMDA receptor regulated 1-like                                          | 0.030  | 1.021 | 9.24E-01 | 9.24E+01 |  |
| 7968787 | NR_002822       | MGC72080   | MGC72080 pseudogene                                                     | -0.028 | 0.980 | 9.23E-01 | 9.23E+01 |  |
| 7968789 | NM_014059       | C13orf15   | chromosome 13 open reading frame 15                                     | -0.041 | 0.972 | 8.78E-01 | 8.78E+01 |  |
| 7968796 | ---             | ---        | ---                                                                     | 0.112  | 1.081 | 6.81E-01 | 6.81E+01 |  |
| 7968798 | ---             | ---        | ---                                                                     | 0.012  | 1.008 | 9.60E-01 | 9.60E+01 |  |
| 7968800 | NM_178009       | DGKH       | diacylglycerol kinase, eta                                              | 0.133  | 1.096 | 3.84E-01 | 3.84E+01 |  |
| 7968835 | NM_016248       | AKAP11     | A kinase (PRKA) anchor protein 11                                       | 0.128  | 1.093 | 1.50E-01 | 1.50E+01 |  |
| 7968872 | NM_013238       | DNAJC15    | DnaJ (Hsp40) homolog, subfamily 15                                      | 0.232  | 1.174 | 3.10E-02 | 3.10E+00 |  |
| 7968890 | NM_003646       | DGKZ       | diacylglycerol kinase, zeta 104kDa                                      | -0.009 | 0.994 | 9.48E-01 | 9.48E+01 |  |
| 7968898 | BC039586        | KIAA1704   | KIAA1704                                                                | 0.007  | 1.005 | 9.75E-01 | 9.75E+01 |  |
| 7968913 | ---             | ---        | ---                                                                     | 0.026  | 1.018 | 8.82E-01 | 8.82E+01 |  |
| 7968915 | NM_004128       | GTF2F2     | general transcription factor IIF, polypeptide 2                         | 0.091  | 1.065 | 3.95E-01 | 3.95E+01 |  |
| 7968928 | NM_002901       | RCN1       | reticulocalbin 1, EF-hand calcium binding                               | 0.049  | 1.035 | 8.31E-01 | 8.31E+01 |  |
| 7968931 | NM_031431       | COG3       | component of oligomeric golgi complex                                   | -0.051 | 0.965 | 7.17E-01 | 7.17E+01 |  |
| 7968972 | NM_005694       | COX17      | COX17 cytochrome c oxidase subunit 17                                   | -0.074 | 0.950 | 6.81E-01 | 6.81E+01 |  |
| 7968976 | NM_015116       | LRCH1      | leucine-rich repeats and calponin                                       | -0.043 | 0.970 | 7.79E-01 | 7.79E+01 |  |
| 7968999 | NM_018283       | NUDT15     | nudix (nucleoside diphosphate linked moiety X) motif 15                 | -0.041 | 0.972 | 7.51E-01 | 7.51E+01 |  |
| 7969003 | NM_021999       | ITM2B      | integral membrane protein 2B                                            | 0.079  | 1.056 | 4.82E-01 | 4.82E+01 |  |
| 7969017 | NM_000321       | RB1        | retinoblastoma 1                                                        | 0.268  | 1.204 | 2.84E-02 | 2.84E+00 |  |
| 7969048 | ---             | ---        | ---                                                                     | 0.059  | 1.042 | 7.75E-01 | 7.75E+01 |  |
| 7969058 | ---             | ---        | ---                                                                     | 0.046  | 1.033 | 7.93E-01 | 7.93E+01 |  |
| 7969060 | NM_00107967     | FNDC3A     | fibronectin type III domain containing 3A                               | 0.125  | 1.090 | 3.62E-01 | 3.62E+01 |  |
| 7969093 | NM_001507       | MLNR       | motilin receptor                                                        | -0.055 | 0.963 | 7.17E-01 | 7.17E+01 |  |
| 7969096 | NM_030911       | CDADC1     | cytidine and dCMP deaminase domain containing 1                         | 0.021  | 1.015 | 9.12E-01 | 9.12E+01 |  |
| 7969114 | NM_031915       | SETDB2     | SET domain, bifurcated 2                                                | 0.294  | 1.226 | 2.23E-03 | 2.23E-01 |  |
| 7969129 | NM_00104044     | PHF11      | PHD finger protein 11                                                   | 0.056  | 1.039 | 7.97E-01 | 7.97E+01 |  |
| 7969143 | ---             | ---        | ---                                                                     | 0.006  | 1.004 | 9.74E-01 | 9.74E+01 |  |
| 7969145 | NM_138450       | ARL11      | ADP-ribosylation factor-like 11                                         | 0.174  | 1.128 | 2.13E-01 | 2.13E+01 |  |
| 7969153 | NM_213590       | TRIM13     | tripartite motif-containing 13                                          | 0.134  | 1.097 | 9.74E-02 | 9.74E+00 |  |
| 7969177 | NR_002183       | FAM10A4    | ST13-like tumor suppressor                                              | -0.044 | 0.970 | 6.97E-01 | 6.97E+01 |  |
| 7969179 | NM_024570       | RNASEH2B   | ribonuclease H2, subunit B                                              | 0.222  | 1.167 | 1.18E-03 | 1.18E-01 |  |
| 7969202 | ---             | ---        | ---                                                                     | -0.051 | 0.965 | 9.27E-01 | 9.27E+01 |  |
| 7969204 | NM_052950       | WDFY2      | WD repeat and FYVE domain containing 2                                  | 0.094  | 1.067 | 3.17E-01 | 3.17E+01 |  |
| 7969228 | NM_00100412     | ALG11      | asparagine-linked glycosylation 11                                      | 0.054  | 1.038 | 7.72E-01 | 7.72E+01 |  |
| 7969241 | ---             | ---        | ---                                                                     | 0.005  | 1.004 | 9.89E-01 | 9.89E+01 |  |
| 7969243 | NM_018204       | CKAP2      | cytoskeleton associated protein 2                                       | -0.035 | 0.976 | 8.92E-01 | 8.92E+01 |  |
| 7969263 | NM_00101172     | HNRNPA1L2  | heterogeneous nuclear ribonucleoprotein A1-like 2                       | -0.098 | 0.934 | 5.10E-01 | 5.10E+01 |  |
| 7969271 | NM_00113091     | SUGT1      | SGT1, suppressor of G2 allele of SKI                                    | -0.067 | 0.955 | 7.05E-01 | 7.05E+01 |  |
| 7969286 | ---             | ---        | ---                                                                     | -0.001 | 1.000 | 9.97E-01 | 9.97E+01 |  |
| 7969339 | ---             | ---        | ---                                                                     | 0.220  | 1.165 | 4.47E-01 | 4.47E+01 |  |
| 7969341 | NM_030794       | TDRD3      | tudor domain containing 3                                               | -0.055 | 0.962 | 6.87E-01 | 6.87E+01 |  |
| 7969368 | ---             | ---        | ---                                                                     | 0.086  | 1.061 | 4.98E-01 | 4.98E+01 |  |
| 7969370 | ---             | ---        | ---                                                                     | -0.070 | 0.953 | 6.36E-01 | 6.36E+01 |  |

|         |              |          |                                      |        |       |          |          |  |  |
|---------|--------------|----------|--------------------------------------|--------|-------|----------|----------|--|--|
| 7969372 | ---          | ---      | ---                                  | 0.006  | 1.004 | 9.72E-01 | 9.72E+01 |  |  |
| 7969414 | NM_001730    | KLF5     | Kruppel-like factor 5 (intestinal)   | -0.055 | 0.963 | 6.07E-01 | 6.07E+01 |  |  |
| 7969428 | NM_006002    | UCHL3    | ubiquitin carboxyl-terminal estera   | 0.073  | 1.052 | 6.36E-01 | 6.36E+01 |  |  |
| 7969472 | ENST00000318 | FLJ35379 | similar to Alu subfamily J sequence  | 0.000  | 1.000 | 1.00E+00 | 1.00E+02 |  |  |
| 7969533 | NM_00104015  | SLAIN1   | SLAIN motif family, member 1         | -0.067 | 0.955 | 8.05E-01 | 8.05E+01 |  |  |
| 7969559 | ---          | ---      | ---                                  | -0.012 | 0.992 | 9.15E-01 | 9.15E+01 |  |  |
| 7969574 | NM_000224    | KRT18    | keratin 18                           | -0.010 | 0.993 | 9.81E-01 | 9.81E+01 |  |  |
| 7969626 | NM_180989    | GPR180   | G protein-coupled receptor 180       | 0.015  | 1.011 | 9.56E-01 | 9.56E+01 |  |  |
| 7969651 | NM_006260    | DNAJC3   | DnaJ (Hsp40) homolog, subfamily      | 0.130  | 1.094 | 5.34E-01 | 5.34E+01 |  |  |
| 7969671 | ---          | ---      | ---                                  | -0.040 | 0.973 | 8.28E-01 | 8.28E+01 |  |  |
| 7969677 | NM_144778    | MBNL2    | muscleblind-like 2 (Drosophila)      | 0.055  | 1.039 | 7.85E-01 | 7.85E+01 |  |  |
| 7969693 | NM_021033    | RAP2A    | RAP2A, member of RAS oncogene        | 0.169  | 1.124 | 2.81E-01 | 2.81E+01 |  |  |
| 7969703 | NM_002271    | IPO5     | importin 5                           | -0.021 | 0.986 | 9.33E-01 | 9.33E+01 |  |  |
| 7969770 | ---          | ---      | ---                                  | 0.010  | 1.007 | 9.85E-01 | 9.85E+01 |  |  |
| 7969772 | ---          | ---      | ---                                  | 0.039  | 1.027 | 8.05E-01 | 8.05E+01 |  |  |
| 7969776 | NR_026644    | UBAC2    | UBA domain containing 2              | -0.038 | 0.974 | 7.42E-01 | 7.42E+01 |  |  |
| 7969792 | ---          | ---      | ---                                  | 0.020  | 1.014 | 8.07E-01 | 8.07E+01 |  |  |
| 7969794 | AY358798     | UNQ1829  | FRSS1829                             | 0.255  | 1.193 | 3.25E-01 | 3.25E+01 |  |  |
| 7969796 | NM_004800    | TM9SF2   | transmembrane 9 superfamily me       | 0.134  | 1.098 | 2.22E-01 | 2.22E+01 |  |  |
| 7969815 | NM_206808    | CLYBL    | citrate lyase beta like              | 0.017  | 1.012 | 9.60E-01 | 9.60E+01 |  |  |
| 7969828 | ---          | ---      | ---                                  | -0.040 | 0.973 | 7.69E-01 | 7.69E+01 |  |  |
| 7969830 | NM_007129    | ZIC2     | Zic family member 2 (odd-paired H    | 0.003  | 1.002 | 9.86E-01 | 9.86E+01 |  |  |
| 7969861 | NM_004791    | ITGBL1   | integrin, beta-like 1 (with EGF-like | 0.002  | 1.002 | 9.89E-01 | 9.89E+01 |  |  |
| 7969881 | NM_003291    | TPP2     | tripeptidyl peptidase II             | 0.084  | 1.060 | 4.27E-01 | 4.27E+01 |  |  |
| 7969933 | AK126520     | BIVM     | basic, immunoglobulin-like variabl   | 0.010  | 1.007 | 9.81E-01 | 9.81E+01 |  |  |
| 7969935 | NM_000123    | ERCC5    | excision repair cross-complement     | 0.010  | 1.007 | 9.57E-01 | 9.57E+01 |  |  |
| 7969975 | ---          | ---      | ---                                  | -0.057 | 0.961 | 7.51E-01 | 7.51E+01 |  |  |
| 7969979 | NM_032859    | ABHD13   | abhydrolase domain containing 13     | -0.004 | 0.997 | 9.81E-01 | 9.81E+01 |  |  |
| 7969986 | NM_006573    | TNFSF13B | tumor necrosis factor (ligand) sup   | 0.337  | 1.263 | 1.65E-01 | 1.65E+01 |  |  |
| 7970033 | NM_001846    | COL4A2   | collagen, type IV, alpha 2           | 0.024  | 1.017 | 8.11E-01 | 8.11E+01 |  |  |
| 7970084 | NM_018210    | CARD     | carbohydrate kinase domain cont      | 0.003  | 1.002 | 9.86E-01 | 9.86E+01 |  |  |
| 7970096 | NM_005537    | ING1     | inhibitor of growth family, membe    | -0.110 | 0.927 | 6.76E-02 | 6.76E+00 |  |  |
| 7970111 | NM_003899    | ARHGEF7  | Rho guanine nucleotide exchange      | -0.120 | 0.920 | 8.59E-02 | 8.59E+00 |  |  |
| 7970139 | BC029889     | C13orf16 | chromosome 13 open reading fram      | -0.040 | 0.973 | 7.72E-01 | 7.72E+01 |  |  |
| 7970162 | NM_015205    | ATP11A   | ATPase, class VI, type 11A           | 0.106  | 1.076 | 5.53E-01 | 5.53E+01 |  |  |
| 7970194 | NM_00111273  | MCF2L    | MCF.2 cell line derived transformi   | -0.001 | 0.999 | 9.95E-01 | 9.95E+01 |  |  |
| 7970232 | NM_000131    | F7       | coagulation factor VII (serum prot   | -0.011 | 0.992 | 9.57E-01 | 9.57E+01 |  |  |
| 7970241 | NM_000504    | F10      | coagulation factor X                 | 0.023  | 1.016 | 8.33E-01 | 8.33E+01 |  |  |
| 7970251 | NM_003891    | PROZ     | protein Z, vitamin K-dependent pl    | -0.045 | 0.970 | 7.38E-01 | 7.38E+01 |  |  |
| 7970262 | NM_00100889  | CUL4A    | cullin 4A                            | 0.046  | 1.033 | 6.35E-01 | 6.35E+01 |  |  |
| 7970301 | NM_017905    | TMCO3    | transmembrane and coiled-coil do     | -0.046 | 0.969 | 7.99E-01 | 7.99E+01 |  |  |
| 7970317 | NR_026580    | TFDP1    | transcription factor Dp-1            | 0.092  | 1.066 | 5.38E-01 | 5.38E+01 |  |  |
| 7970325 | NM_002929    | GRK1     | G protein-coupled receptor kinase    | -0.081 | 0.946 | 5.61E-01 | 5.61E+01 |  |  |
| 7970329 | NM_000820    | GAS6     | growth arrest-specific 6             | 0.027  | 1.019 | 9.08E-01 | 9.08E+01 |  |  |
| 7970347 | NM_00107864  | CDC16    | cell division cycle 16 homolog (S. c | 0.063  | 1.045 | 6.92E-01 | 6.92E+01 |  |  |
| 7970370 | NM_023011    | UPF3A    | UPF3 regulator of nonsense trans     | 0.055  | 1.039 | 6.92E-01 | 6.92E+01 |  |  |
| 7970376 | NM_032436    | ZNF828   | zinc finger protein 828              | 0.163  | 1.119 | 1.78E-02 | 1.78E+00 |  |  |
| 7970381 | NR_003366    | ANKRD20B | ankyrin repeat domain 20B            | -0.125 | 0.917 | 7.75E-01 | 7.75E+01 |  |  |
| 7970388 | ---          | ---      | ---                                  | 0.027  | 1.019 | 9.49E-01 | 9.49E+01 |  |  |
| 7970392 | ---          | ---      | ---                                  | -1.032 | 0.489 | 1.73E-01 | 1.73E+01 |  |  |
| 7970395 | NM_006001    | TUBA3C   | tubulin, alpha 3c                    | 0.038  | 1.027 | 7.63E-01 | 7.63E+01 |  |  |
| 7970413 | NR_003272    | PSPC1    | paraspeckle component 1              | -0.065 | 0.956 | 5.53E-01 | 5.53E+01 |  |  |
| 7970426 | ---          | ---      | ---                                  | 0.008  | 1.006 | 9.86E-01 | 9.86E+01 |  |  |
| 7970428 | NM_00103965  | ZMYM5    | zinc finger, MYM-type 5              | -0.081 | 0.946 | 5.95E-01 | 5.95E+01 |  |  |
| 7970439 | NM_021954    | GJA3     | gap junction protein, alpha 3, 46kd  | -0.083 | 0.944 | 2.92E-01 | 2.92E+01 |  |  |
| 7970455 | NM_015974    | CRYL1    | crystallin, lambda 1                 | -0.004 | 0.997 | 9.88E-01 | 9.88E+01 |  |  |
| 7970467 | NM_174928    | N6AMT2   | N-6 adenine-specific DNA methylt     | -0.044 | 0.970 | 8.86E-01 | 8.86E+01 |  |  |
| 7970473 | NM_022459    | XPO4     | exportin 4                           | 0.019  | 1.013 | 9.40E-01 | 9.40E+01 |  |  |
| 7970498 | NM_014572    | LATS2    | LATS, large tumor suppressor, hom    | 0.038  | 1.026 | 7.87E-01 | 7.87E+01 |  |  |
| 7970524 | NM_153251    | ZDHHC20  | zinc finger, DHHC-type containing    | 0.163  | 1.119 | 5.53E-02 | 5.53E+00 |  |  |
| 7970542 | ---          | ---      | ---                                  | 0.025  | 1.018 | 9.63E-01 | 9.63E+01 |  |  |
| 7970546 | NM_152726    | EFHA1    | EF-hand domain family, member A      | 0.086  | 1.061 | 5.98E-01 | 5.98E+01 |  |  |
| 7970565 | ---          | ---      | ---                                  | 0.045  | 1.031 | 7.56E-01 | 7.56E+01 |  |  |
| 7970569 | NM_014363    | SACS     | spastic ataxia of Charlevoix-Sague   | -0.155 | 0.898 | 3.94E-01 | 3.94E+01 |  |  |
| 7970577 | NM_005932    | MIPEP    | mitochondrial intermediate peptid    | 0.003  | 1.002 | 9.93E-01 | 9.93E+01 |  |  |
| 7970597 | AK128225     | FLJ46358 | FLJ46358 protein                     | 0.048  | 1.034 | 7.85E-01 | 7.85E+01 |  |  |
| 7970602 | NM_006437    | PARP4    | poly (ADP-ribose) polymerase fam     | 0.024  | 1.017 | 9.23E-01 | 9.23E+01 |  |  |
| 7970624 | NM_018451    | CENPJ    | centromere protein J                 | -0.018 | 0.988 | 9.51E-01 | 9.51E+01 |  |  |
| 7970648 | NM_152704    | FAM123A  | family with sequence similarity 12   | -0.050 | 0.966 | 5.16E-01 | 5.16E+01 |  |  |
| 7970655 | NM_004685    | MTMR6    | myotubularin related protein 6       | 0.069  | 1.049 | 6.39E-01 | 6.39E+01 |  |  |
| 7970674 | ---          | ---      | ---                                  | 0.009  | 1.006 | 9.66E-01 | 9.66E+01 |  |  |
| 7970676 | NM_00100753  | SHISA2   | shisa homolog 2 (Xenopus laevis)     | -0.032 | 0.978 | 8.32E-01 | 8.32E+01 |  |  |
| 7970681 | NM_005977    | RNF6     | ring finger protein (C3H2C3 type)    | 0.019  | 1.013 | 9.09E-01 | 9.09E+01 |  |  |
| 7970696 | NM_182488    | USP12    | ubiquitin specific peptidase 12      | -0.130 | 0.914 | 1.76E-01 | 1.76E+01 |  |  |
| 7970704 | NM_152912    | MTIF3    | mitochondrial translational initiat  | 0.035  | 1.025 | 8.04E-01 | 8.04E+01 |  |  |
| 7970716 | NM_153371    | LNK2     | ligand of numb-protein X 2           | -0.060 | 0.959 | 7.63E-01 | 7.63E+01 |  |  |
| 7970727 | NM_001265    | CDX2     | caudal type homeobox 2               | 0.023  | 1.016 | 8.09E-01 | 8.09E+01 |  |  |



|         |              |              |                                      |        |       |          |          |  |  |
|---------|--------------|--------------|--------------------------------------|--------|-------|----------|----------|--|--|
| 7970735 | ---          | ---          | ---                                  | 0.012  | 1.009 | 9.54E-01 | 9.54E+01 |  |  |
| 7970737 | NM_004119    | FLT3         | fms-related tyrosine kinase 3        | -0.308 | 0.808 | 1.39E-01 | 1.39E+01 |  |  |
| 7970793 | NM_181785    | SLC46A3      | solute carrier family 46, member 3   | 0.269  | 1.205 | 5.53E-02 | 5.53E+00 |  |  |
| 7970806 | BC027486     | hCG_2020170  | hCG2020170                           | -0.051 | 0.965 | 6.18E-01 | 6.18E+01 |  |  |
| 7970810 | NM_003045    | SLC7A1       | solute carrier family 7 (cationic an | -0.018 | 0.988 | 9.38E-01 | 9.38E+01 |  |  |
| 7970828 | AB064667     | OK/SW-CL.58  | OK/SW-CL.58                          | 0.060  | 1.042 | 6.66E-01 | 6.66E+01 |  |  |
| 7970831 | NM_007106    | UBL3         | ubiquitin-like 3                     | -0.036 | 0.976 | 8.25E-01 | 8.25E+01 |  |  |
| 7970842 | ---          | ---          | ---                                  | -0.094 | 0.937 | 4.05E-01 | 4.05E+01 |  |  |
| 7970858 | NM_002128    | HMGB1        | high-mobility group box 1            | -0.088 | 0.941 | 6.13E-01 | 6.13E+01 |  |  |
| 7970864 | NM_006644    | HSPH1        | heat shock 105kDa/110kDa protei      | -0.060 | 0.960 | 7.60E-01 | 7.60E+01 |  |  |
| 7970892 | NM_052818    | N4BP2L1      | NEDD4 binding protein 2-like 1       | 0.103  | 1.074 | 5.91E-01 | 5.91E+01 |  |  |
| 7970905 | ---          | ---          | ---                                  | -0.079 | 0.947 | 7.76E-01 | 7.76E+01 |  |  |
| 7970907 | NM_014887    | N4BP2L2      | NEDD4 binding protein 2-like 2       | 0.001  | 1.001 | 9.95E-01 | 9.95E+01 |  |  |
| 7970922 | ---          | ---          | ---                                  | -0.144 | 0.905 | 6.35E-01 | 6.35E+01 |  |  |
| 7970973 | ---          | ---          | ---                                  | 0.032  | 1.022 | 9.37E-01 | 9.37E+01 |  |  |
| 7970999 | NM_015087    | SPG20        | spastic paraplegia 20 (Troyer synd   | 0.054  | 1.038 | 8.45E-01 | 8.45E+01 |  |  |
| 7971013 | ---          | ---          | ---                                  | -0.225 | 0.855 | 1.31E-01 | 1.31E+01 |  |  |
| 7971015 | NM_00112721  | SMAD9        | SMAD family member 9                 | 0.026  | 1.018 | 8.63E-01 | 8.63E+01 |  |  |
| 7971027 | NM_013338    | ALG5         | asparagine-linked glycosylation 5,   | 0.096  | 1.069 | 5.24E-01 | 5.24E+01 |  |  |
| 7971039 | NM_00101428  | FAM48A       | family with sequence similarity 48   | 0.017  | 1.012 | 9.15E-01 | 9.15E+01 |  |  |
| 7971071 | NM_145203    | CSNK1A1L     | casein kinase 1, alpha 1-like        | -0.003 | 0.998 | 9.86E-01 | 9.86E+01 |  |  |
| 7971122 | ---          | ---          | ---                                  | 0.026  | 1.018 | 9.15E-01 | 9.15E+01 |  |  |
| 7971124 | NM_016617    | UFM1         | ubiquitin-fold modifier 1            | 0.169  | 1.124 | 3.63E-02 | 3.63E+00 |  |  |
| 7971134 | NM_025138    | C13orf23     | chromosome 13 open reading fram      | 0.050  | 1.035 | 6.00E-01 | 6.00E+01 |  |  |
| 7971150 | NM_005780    | LHFP         | lipoma HMGIC fusion partner          | -0.094 | 0.937 | 3.36E-01 | 3.36E+01 |  |  |
| 7971163 | ---          | ---          | ---                                  | 0.052  | 1.037 | 6.93E-01 | 6.93E+01 |  |  |
| 7971167 | NR_024507    | LOC646982    | twelve-thirteen translocation leuk   | 0.074  | 1.052 | 4.04E-01 | 4.04E+01 |  |  |
| 7971177 | NM_002015    | FOXO1        | forkhead box O1                      | 0.018  | 1.012 | 9.00E-01 | 9.00E+01 |  |  |
| 7971184 | NM_005830    | MRPS31       | mitochondrial ribosomal protein S    | 0.011  | 1.007 | 9.64E-01 | 9.64E+01 |  |  |
| 7971197 | NM_172373    | ELF1         | E74-like factor 1 (ets domain trans  | 0.055  | 1.039 | 4.32E-01 | 4.32E+01 |  |  |
| 7971208 | NM_152903    | KBTBD6       | kelch repeat and BTB (POZ) domain    | -0.017 | 0.988 | 9.38E-01 | 9.38E+01 |  |  |
| 7971216 | ---          | ---          | ---                                  | 0.171  | 1.126 | 4.05E-01 | 4.05E+01 |  |  |
| 7971218 | NM_032138    | KBTBD7       | kelch repeat and BTB (POZ) domain    | 0.036  | 1.025 | 8.84E-01 | 8.84E+01 |  |  |
| 7971222 | NM_004294    | MTRF1        | mitochondrial translational release  | 0.094  | 1.067 | 5.15E-01 | 5.15E+01 |  |  |
| 7971239 | ---          | ---          | ---                                  | 0.231  | 1.174 | 5.53E-01 | 5.53E+01 |  |  |
| 7971241 | NR_002822    | MGC72080     | MGC72080 pseudogene                  | -0.032 | 0.978 | 9.07E-01 | 9.07E+01 |  |  |
| 7971243 | ---          | ---          | ---                                  | -0.056 | 0.962 | 4.94E-01 | 4.94E+01 |  |  |
| 7971246 | NM_015058    | KIAA0564     | KIAA0564                             | 0.053  | 1.037 | 7.74E-01 | 7.74E+01 |  |  |
| 7971296 | NM_00100226  | EPST11       | epithelial stromal interaction 1 (br | 0.288  | 1.221 | 1.53E-01 | 1.53E+01 |  |  |
| 7971345 | ENST00000400 | MGC5590      | hypothetical protein MGC5590         | 0.050  | 1.035 | 6.95E-01 | 6.95E+01 |  |  |
| 7971350 | NM_183422    | TSC2D1       | TSC22 domain family, member 1        | -0.063 | 0.957 | 7.17E-01 | 7.17E+01 |  |  |
| 7971361 | NM_012345    | NUFIP1       | nuclear fragile X mental retardatio  | -0.052 | 0.964 | 8.77E-01 | 8.77E+01 |  |  |
| 7971373 | ---          | ---          | ---                                  | -0.121 | 0.920 | 7.77E-01 | 7.77E+01 |  |  |
| 7971375 | NM_003295    | TPT1         | tumor protein, translationally-con   | -0.050 | 0.966 | 4.84E-01 | 4.84E+01 |  |  |
| 7971386 | NR_002967    | SNORA31      | small nucleolar RNA, H/ACA box 3     | -0.038 | 0.974 | 8.63E-01 | 8.63E+01 |  |  |
| 7971388 | NM_00101087  | SLC25A30     | solute carrier family 25, member 3   | 0.233  | 1.175 | 5.38E-02 | 5.38E+00 |  |  |
| 7971419 | NM_198849    | SLAH3        | seven in absentia homolog 3 (Dros    | -0.073 | 0.951 | 7.61E-01 | 7.61E+01 |  |  |
| 7971422 | NM_015070    | ZC3H13       | zinc finger CCH-type containing 1    | -0.051 | 0.965 | 6.19E-01 | 6.19E+01 |  |  |
| 7971461 | NM_002298    | LCP1         | lymphocyte cytosolic protein 1 (L-   | 0.100  | 1.072 | 4.42E-01 | 4.42E+01 |  |  |
| 7971482 | ---          | ---          | ---                                  | 0.058  | 1.041 | 8.26E-01 | 8.26E+01 |  |  |
| 7971486 | NM_025113    | C13orf18     | chromosome 13 open reading fram      | 0.364  | 1.287 | 2.03E-01 | 2.03E+01 |  |  |
| 7971511 | ---          | ---          | ---                                  | 0.284  | 1.217 | 2.88E-01 | 2.88E+01 |  |  |
| 7971513 | NM_001984    | ESD          | esterase D/formylglutathione hyd     | -0.067 | 0.954 | 7.13E-01 | 7.13E+01 |  |  |
| 7971541 | NM_003850    | SUCLA2       | succinate-CoA ligase, ADP-forming    | 0.066  | 1.047 | 6.88E-01 | 6.88E+01 |  |  |
| 7971550 | NM_014166    | MED4         | mediator complex subunit 4           | 0.030  | 1.021 | 8.64E-01 | 8.64E+01 |  |  |
| 7971563 | NM_020357    | PCNP         | PEST proteolytic signal containing   | 0.084  | 1.060 | 5.34E-01 | 5.34E+01 |  |  |
| 7971565 | NM_005767    | LPAR6        | lysophosphatidic acid receptor 6     | 0.217  | 1.163 | 1.29E-01 | 1.29E+01 |  |  |
| 7971602 | NM_018191    | RCBTB1       | regulator of chromosome condens      | 0.107  | 1.077 | 4.60E-01 | 4.60E+01 |  |  |
| 7971615 | NM_032565    | EBPL         | emopamil binding protein-like        | 0.061  | 1.043 | 6.83E-01 | 6.83E+01 |  |  |
| 7971620 | NM_002267    | KPNA3        | karyopherin alpha 3 (importin alph   | 0.047  | 1.033 | 7.46E-01 | 7.46E+01 |  |  |
| 7971644 | NM_020456    | C13orf1      | chromosome 13 open reading fram      | -0.002 | 0.998 | 9.90E-01 | 9.90E+01 |  |  |
| 7971653 | NR_002612    | DLEU2        | deleted in lymphocytic leukemia 2    | 0.141  | 1.102 | 5.30E-01 | 5.30E+01 |  |  |
| 7971663 | NM_198989    | DLEU7        | deleted in lymphocytic leukemia, 7   | -0.057 | 0.961 | 6.06E-01 | 6.06E+01 |  |  |
| 7971692 | NM_012141    | INTS6        | integrator complex subunit 6         | -0.089 | 0.940 | 4.47E-01 | 4.47E+01 |  |  |
| 7971711 | ---          | ---          | ---                                  | 0.245  | 1.185 | 1.63E-01 | 1.63E+01 |  |  |
| 7971713 | NM_024705    | DHRS12       | dehydrogenase/reductase (SDR fa      | 0.009  | 1.006 | 9.65E-01 | 9.65E+01 |  |  |
| 7971723 | NR_027047    | RP11-327P2.4 | hypothetical LOC283521               | 0.091  | 1.065 | 4.25E-01 | 4.25E+01 |  |  |
| 7971813 | NM_018676    | THSD1        | thrombospondin, type 1, domain c     | -0.038 | 0.974 | 8.45E-01 | 8.45E+01 |  |  |
| 7971820 | NM_016075    | VPS36        | vacuolar protein sorting 36 homol    | 0.042  | 1.030 | 7.11E-01 | 7.11E+01 |  |  |
| 7971858 | ---          | ---          | ---                                  | -0.074 | 0.950 | 6.47E-01 | 6.47E+01 |  |  |
| 7971862 | ---          | ---          | ---                                  | 0.020  | 1.014 | 9.02E-01 | 9.02E+01 |  |  |
| 7971864 | ---          | ---          | ---                                  | -0.063 | 0.958 | 6.39E-01 | 6.39E+01 |  |  |
| 7971899 | ---          | ---          | ---                                  | -0.061 | 0.959 | 6.50E-01 | 6.50E+01 |  |  |
| 7971920 | NM_194247    | HNRNPA3      | heterogeneous nuclear ribonucleo     | 0.036  | 1.026 | 6.15E-01 | 6.15E+01 |  |  |
| 7971967 | NM_014953    | DIS3         | DIS3 mitotic control homolog (S. c   | -0.007 | 0.995 | 9.70E-01 | 9.70E+01 |  |  |
| 7971996 | ---          | ---          | ---                                  | 0.216  | 1.162 | 5.36E-01 | 5.36E+01 |  |  |
| 7971998 | ---          | ---          | ---                                  | 0.082  | 1.058 | 3.60E-01 | 3.60E+01 |  |  |

|         |              |              |                                    |        |       |          |          |  |  |
|---------|--------------|--------------|------------------------------------|--------|-------|----------|----------|--|--|
| 7972001 | ---          | ---          | ---                                | -0.092 | 0.938 | 4.05E-01 | 4.05E+01 |  |  |
| 7972003 | NM_007249    | KLF12        | Kruppel-like factor 12             | 0.038  | 1.027 | 8.75E-01 | 8.75E+01 |  |  |
| 7972021 | NM_014832    | TBC1D4       | TBC1 domain family, member 4       | 0.098  | 1.070 | 4.03E-01 | 4.03E+01 |  |  |
| 7972044 | NM_203497    | COMMMD6      | COMM domain containing 6           | 0.085  | 1.061 | 5.02E-01 | 5.02E+01 |  |  |
| 7972055 | NM_138444    | KCTD12       | potassium channel tetramerisation  | 0.226  | 1.170 | 9.52E-02 | 9.52E+00 |  |  |
| 7972062 | NM_012158    | FBXL3        | F-box and leucine-rich repeat prot | 0.001  | 1.001 | 9.96E-01 | 9.96E+01 |  |  |
| 7972069 | NM_015057    | MYCBP2       | MYC binding protein 2              | 0.082  | 1.058 | 2.29E-01 | 2.29E+01 |  |  |
| 7972177 | NM_006237    | POU4F1       | POU class 4 homeobox 1             | -0.009 | 0.994 | 9.64E-01 | 9.64E+01 |  |  |
| 7972180 | NM_024546    | RNF219       | ring finger protein 219            | 0.025  | 1.018 | 9.07E-01 | 9.07E+01 |  |  |
| 7972190 | NM_022118    | RBM26        | RNA binding motif protein 26       | 0.041  | 1.029 | 7.51E-01 | 7.51E+01 |  |  |
| 7972215 | ---          | ---          | ---                                | 0.239  | 1.180 | 3.27E-01 | 3.27E+01 |  |  |
| 7972247 | BC036697     | SP3P         | Sp3 transcription factor pseudoge  | 0.015  | 1.010 | 8.78E-01 | 8.78E+01 |  |  |
| 7972257 | ---          | ---          | ---                                | -0.007 | 0.995 | 9.83E-01 | 9.83E+01 |  |  |
| 7972297 | NM_005845    | ABCC4        | ATP-binding cassette, sub-family C | 0.005  | 1.004 | 9.86E-01 | 9.86E+01 |  |  |
| 7972438 | NM_178861    | RNF113B      | ring finger protein 113B           | -0.078 | 0.948 | 4.32E-01 | 4.32E+01 |  |  |
| 7972442 | ---          | ---          | ---                                | 0.067  | 1.048 | 6.37E-01 | 6.37E+01 |  |  |
| 7972444 | NM_003576    | STK24        | serine/threonine kinase 24 (STE20  | -0.028 | 0.981 | 7.85E-01 | 7.85E+01 |  |  |
| 7972487 | NM_015296    | DOCK9        | dedicator of cytokinesis 9         | -0.177 | 0.884 | 3.06E-01 | 3.06E+01 |  |  |
| 7972546 | ---          | ---          | ---                                | 0.033  | 1.023 | 7.68E-01 | 7.68E+01 |  |  |
| 7972548 | NM_005292    | GPR18        | G protein-coupled receptor 18      | 0.121  | 1.087 | 3.92E-01 | 3.92E+01 |  |  |
| 7972561 | ---          | ---          | ---                                | 0.169  | 1.125 | 5.04E-01 | 5.04E+01 |  |  |
| 7972567 | NM_033132    | ZIC5         | Zic family member 5 (odd-paired h  | 0.029  | 1.020 | 8.39E-01 | 8.39E+01 |  |  |
| 7972570 | NM_033110    | A2LD1        | AIG2-like domain 1                 | 0.000  | 1.000 | 1.00E+00 | 1.00E+02 |  |  |
| 7972577 | NM_001029    | RPS26        | ribosomal protein S26              | 0.013  | 1.009 | 9.77E-01 | 9.77E+01 |  |  |
| 7972579 | NM_032813    | TMTC4        | transmembrane and tetratricopep    | -0.060 | 0.959 | 7.78E-01 | 7.78E+01 |  |  |
| 7972663 | ---          | ---          | ---                                | -0.034 | 0.977 | 8.33E-01 | 8.33E+01 |  |  |
| 7972711 | ---          | ---          | ---                                | 0.045  | 1.032 | 7.87E-01 | 7.87E+01 |  |  |
| 7972723 | NM_018011    | ARGLU1       | arginine and glutamate rich 1      | 0.034  | 1.024 | 7.55E-01 | 7.55E+01 |  |  |
| 7972737 | NM_002312    | LIG4         | ligase IV, DNA, ATP-dependent      | 0.008  | 1.006 | 9.74E-01 | 9.74E+01 |  |  |
| 7972743 | ---          | ---          | ---                                | 0.429  | 1.347 | 9.39E-02 | 9.39E+00 |  |  |
| 7972745 | NM_003749    | IRS2         | insulin receptor substrate 2       | -0.079 | 0.947 | 3.72E-01 | 3.72E+01 |  |  |
| 7972748 | ---          | ---          | ---                                | -0.024 | 0.984 | 8.97E-01 | 8.97E+01 |  |  |
| 7972805 | NM_017817    | RAB20        | RAB20, member RAS oncogene fa      | 0.168  | 1.124 | 2.94E-01 | 2.94E+01 |  |  |
| 7972808 | AK093771     | CARKD        | carbohydrate kinase domain conta   | -0.059 | 0.960 | 6.03E-01 | 6.03E+01 |  |  |
| 7972810 | NM_024537    | CARS2        | cysteinyl-tRNA synthetase 2, mito  | 0.136  | 1.099 | 1.45E-01 | 1.45E+01 |  |  |
| 7972828 | NM_017664    | ANKRD10      | ankyrin repeat domain 10           | -0.007 | 0.995 | 9.64E-01 | 9.64E+01 |  |  |
| 7972840 | NM_006322    | TUBGCP3      | tubulin, gamma complex associate   | 0.079  | 1.056 | 6.39E-01 | 6.39E+01 |  |  |
| 7972867 | NM_00112720  | PCID2        | PCI domain containing 2            | 0.064  | 1.045 | 6.69E-01 | 6.69E+01 |  |  |
| 7972888 | BC008975     | PCID2        | PCI domain containing 2            | -0.036 | 0.976 | 8.92E-01 | 8.92E+01 |  |  |
| 7972890 | NM_024719    | GRTF1        | growth hormone regulated TBC pr    | 0.018  | 1.012 | 8.57E-01 | 8.57E+01 |  |  |
| 7972899 | BX647655     | DKFZp451A211 | DKFZp451A211 protein               | -0.031 | 0.979 | 8.05E-01 | 8.05E+01 |  |  |
| 7972902 | NM_138430    | ADPRHL1      | ADP-ribosylhydrolase like 1        | -0.045 | 0.970 | 7.14E-01 | 7.14E+01 |  |  |
| 7972921 | ---          | ---          | ---                                | -0.094 | 0.937 | 8.10E-01 | 8.10E+01 |  |  |
| 7972923 | NM_000705    | ATP4B        | ATPase, H+/K+ exchanging, beta p   | 0.010  | 1.007 | 9.51E-01 | 9.51E+01 |  |  |
| 7972936 | NM_182614    | FAM70B       | family with sequence similarity 70 | -0.007 | 0.995 | 9.77E-01 | 9.77E+01 |  |  |
| 7972946 | NM_007368    | RASA3        | RAS p21 protein activator 3        | -0.114 | 0.924 | 5.23E-01 | 5.23E+01 |  |  |
| 7972973 | AF287261     | SETD8        | SET domain containing (lysine met  | -0.062 | 0.958 | 5.83E-01 | 5.83E+01 |  |  |
| 7972977 | ---          | ---          | ---                                | -0.036 | 0.975 | 8.65E-01 | 8.65E+01 |  |  |
| 7973036 | NM_005484    | PARP2        | poly (ADP-ribose) polymerase 2     | 0.082  | 1.059 | 6.18E-01 | 6.18E+01 |  |  |
| 7973054 | ---          | ---          | ---                                | -0.067 | 0.955 | 7.07E-01 | 7.07E+01 |  |  |
| 7973056 | NM_001641    | APEX1        | APEX nuclease (multifunctional DN  | 0.011  | 1.008 | 9.68E-01 | 9.68E+01 |  |  |
| 7973067 | NM_000270    | NP           | nucleoside phosphorylase           | -0.177 | 0.885 | 2.84E-01 | 2.84E+01 |  |  |
| 7973080 | AK093210     | LOC254028    | hypothetical LOC254028             | -0.048 | 0.968 | 7.14E-01 | 7.14E+01 |  |  |
| 7973101 | NM_005615    | RNASE6       | ribonuclease, RNase A family, k6   | 0.815  | 1.759 | 5.26E-02 | 5.26E+00 |  |  |
| 7973105 | NM_002935    | RNASE3       | ribonuclease, RNase A family, 3 (e | 0.010  | 1.007 | 9.61E-01 | 9.61E+01 |  |  |
| 7973108 | ENST00000258 | LOC643332    | similar to Nonsecretory ribonuclea | 0.058  | 1.041 | 8.20E-01 | 8.20E+01 |  |  |
| 7973116 | NM_00102999  | METT11D1     | methyltransferase 11 domain cont   | 0.019  | 1.013 | 9.11E-01 | 9.11E+01 |  |  |
| 7973158 | NM_018071    | FLJ10357     | hypothetical protein FLJ10357      | 0.071  | 1.050 | 3.75E-01 | 3.75E+01 |  |  |
| 7973214 | NM_014828    | TOX4         | TOX high mobility group box famil  | -0.059 | 0.960 | 5.29E-01 | 5.29E+01 |  |  |
| 7973221 | AK301287     | TRAJ17       | T cell receptor alpha joining 17   | -0.061 | 0.959 | 7.59E-01 | 7.59E+01 |  |  |
| 7973303 | X01403       | TRA@         | T cell receptor alpha locus        | -0.242 | 0.846 | 5.54E-01 | 5.54E+01 |  |  |
| 7973306 | NM_022060    | ABHD4        | abhydrolase domain containing 4    | -0.212 | 0.863 | 3.14E-02 | 3.14E+00 |  |  |
| 7973314 | NM_005015    | OXA1L        | oxidase (cytochrome c) assembly ;  | 0.021  | 1.015 | 8.72E-01 | 8.72E+01 |  |  |
| 7973327 | NM_181304    | MRPL52       | mitochondrial ribosomal protein L  | -0.123 | 0.918 | 3.17E-01 | 3.17E+01 |  |  |
| 7973352 | NM_014045    | LRP10        | low density lipoprotein receptor-r | -0.094 | 0.937 | 4.32E-01 | 4.32E+01 |  |  |
| 7973363 | NM_173527    | REM2         | RAS (RAD and GEM)-like GTP bindi   | -0.023 | 0.984 | 8.80E-01 | 8.80E+01 |  |  |
| 7973371 | BC009645     | C14orf119    | chromosome 14 open reading fram    | 0.069  | 1.049 | 5.16E-01 | 5.16E+01 |  |  |
| 7973377 | NM_004050    | BCL2L2       | BCL2-like 2                        | -0.044 | 0.970 | 8.08E-01 | 8.08E+01 |  |  |
| 7973384 | NM_004643    | PABPN1       | poly(A) binding protein, nuclear 1 | -0.018 | 0.987 | 9.04E-01 | 9.04E+01 |  |  |
| 7973393 | NM_022789    | IL25         | interleukin 25                     | -0.062 | 0.958 | 5.35E-01 | 5.35E+01 |  |  |
| 7973414 | NM_015514    | NGDN         | neuroguidin, EIF4E binding protei  | -0.084 | 0.943 | 5.97E-01 | 5.97E+01 |  |  |
| 7973427 | NM_024328    | THTPA        | thiamine triphosphatase            | -0.054 | 0.963 | 8.05E-01 | 8.05E+01 |  |  |
| 7973448 | NM_021004    | DHRS4        | dehydrogenase/reductase (SDR fa    | 0.063  | 1.044 | 7.57E-01 | 7.57E+01 |  |  |
| 7973458 | NM_198083    | DHRS4L2      | dehydrogenase/reductase (SDR fa    | 0.113  | 1.082 | 5.24E-01 | 5.24E+01 |  |  |
| 7973468 | NM_138360    | LRRC16B      | leucine rich repeat containing 16B | -0.090 | 0.940 | 2.57E-01 | 2.57E+01 |  |  |
| 7973510 | NM_006032    | CPNE6        | copine VI (neuronal)               | -0.005 | 0.996 | 9.75E-01 | 9.75E+01 |  |  |
| 7973530 | NM_004563    | PCK2         | phosphoenolpyruvate carboxykin     | 0.238  | 1.179 | 1.48E-02 | 1.48E+00 |  |  |

|         |             |           |                                      |        |       |          |          |  |  |
|---------|-------------|-----------|--------------------------------------|--------|-------|----------|----------|--|--|
| 7973545 | NM_025230   | DCAF11    | DDB1 and CUL4 associated factor      | 0.069  | 1.049 | 5.91E-01 | 5.91E+01 |  |  |
| 7973564 | NM_176783   | PSME1     | proteasome (prosome, macropain       | 0.033  | 1.023 | 8.40E-01 | 8.40E+01 |  |  |
| 7973580 | NM_203402   | FITM1     | fat storage-inducing transmembra     | -0.092 | 0.938 | 3.53E-01 | 3.53E+01 |  |  |
| 7973584 | NM_017999   | RNF31     | ring finger protein 31               | -0.013 | 0.991 | 9.27E-01 | 9.27E+01 |  |  |
| 7973611 | ---         | ---       | ---                                  | 0.085  | 1.061 | 7.45E-01 | 7.45E+01 |  |  |
| 7973613 | NM_017999   | RNF31     | ring finger protein 31               | 0.022  | 1.015 | 9.04E-01 | 9.04E+01 |  |  |
| 7973618 | NM_006084   | IRF9      | interferon regulatory factor 9       | 0.003  | 1.002 | 9.90E-01 | 9.90E+01 |  |  |
| 7973629 | NM_00104820 | REC8      | REC8 homolog (yeast)                 | -0.082 | 0.945 | 2.08E-01 | 2.08E+01 |  |  |
| 7973652 | NM_174944   | TSSK4     | testis-specific serine kinase 4      | -0.105 | 0.930 | 4.70E-01 | 4.70E+01 |  |  |
| 7973660 | NM_016576   | GMPR2     | guanosine monophosphate reduct       | 0.016  | 1.011 | 9.14E-01 | 9.14E+01 |  |  |
| 7973679 | BC025332    | C14orf21  | chromosome 14 open reading frar      | -0.028 | 0.981 | 8.63E-01 | 8.63E+01 |  |  |
| 7973694 | NM_019839   | LTB4R2    | leukotriene B4 receptor 2            | 0.003  | 1.002 | 9.85E-01 | 9.85E+01 |  |  |
| 7973702 | NM_00114391 | LTB4R     | leukotriene B4 receptor              | 0.001  | 1.000 | 9.98E-01 | 9.98E+01 |  |  |
| 7973709 | NM_004554   | NFATC4    | nuclear factor of activated T-cells, | -0.044 | 0.970 | 7.03E-01 | 7.03E+01 |  |  |
| 7973727 | NM_025081   | KIAA1305  | KIAA1305                             | 0.043  | 1.031 | 7.75E-01 | 7.75E+01 |  |  |
| 7973732 | NM_015299   | KIAA0323  | KIAA0323                             | -0.076 | 0.949 | 4.94E-01 | 4.94E+01 |  |  |
| 7973745 | NM_005249   | FOXG1     | forkhead box G1                      | -0.032 | 0.978 | 7.11E-01 | 7.11E+01 |  |  |
| 7973748 | NR_026731   | C14orf23  | chromosome 14 open reading frar      | -0.015 | 0.989 | 9.19E-01 | 9.19E+01 |  |  |
| 7973770 | NM_016106   | SCFD1     | sec1 family domain containing 1      | 0.138  | 1.100 | 1.49E-01 | 1.49E+01 |  |  |
| 7973797 | NM_00113505 | COCH      | coagulation factor C homolog, coc    | -0.001 | 0.999 | 9.96E-01 | 9.96E+01 |  |  |
| 7973813 | NM_007077   | AP4S1     | adaptor-related protein complex 4    | -0.191 | 0.876 | 1.70E-01 | 1.70E+01 |  |  |
| 7973826 | NM_025152   | NUBPL     | nucleotide binding protein-like      | 0.102  | 1.073 | 7.21E-01 | 7.21E+01 |  |  |
| 7973840 | NM_00103005 | ARHGAP5   | Rho GTPase activating protein 5      | -0.056 | 0.962 | 5.98E-01 | 5.98E+01 |  |  |
| 7973865 | ---         | ---       | ---                                  | -0.011 | 0.992 | 9.52E-01 | 9.52E+01 |  |  |
| 7973867 | ---         | ---       | ---                                  | 0.042  | 1.029 | 9.60E-01 | 9.60E+01 |  |  |
| 7973871 | ---         | ---       | ---                                  | 0.189  | 1.140 | 7.09E-01 | 7.09E+01 |  |  |
| 7973894 | CR595167    | RPL23AP71 | ribosomal protein L23a pseudoge      | -0.118 | 0.922 | 1.63E-01 | 1.63E+01 |  |  |
| 7973898 | ---         | ---       | ---                                  | 0.016  | 1.011 | 9.11E-01 | 9.11E+01 |  |  |
| 7973902 | NM_003136   | SRP54     | signal recognition particle 54kDa    | 0.043  | 1.030 | 7.97E-01 | 7.97E+01 |  |  |
| 7973918 | NM_173607   | FAM177A1  | family with sequence similarity 17   | -0.162 | 0.894 | 2.95E-01 | 2.95E+01 |  |  |
| 7973924 | NM_014672   | KIAA0391  | KIAA0391                             | 0.027  | 1.019 | 8.94E-01 | 8.94E+01 |  |  |
| 7973936 | NM_002791   | PSMA6     | proteasome (prosome, macropain       | -0.038 | 0.974 | 8.73E-01 | 8.73E+01 |  |  |
| 7973943 | NM_032594   | INSM2     | insulinoma-associated 2              | 0.021  | 1.014 | 8.93E-01 | 8.93E+01 |  |  |
| 7973966 | ---         | ---       | ---                                  | 0.011  | 1.008 | 9.57E-01 | 9.57E+01 |  |  |
| 7973983 | ---         | ---       | ---                                  | 0.059  | 1.042 | 6.60E-01 | 6.60E+01 |  |  |
| 7974066 | NM_002687   | PNN       | pinin, desmosome associated prot     | -0.046 | 0.969 | 6.51E-01 | 6.51E+01 |  |  |
| 7974090 | NM_005930   | CTAGE5    | CTAGE family, member 5               | 0.065  | 1.046 | 6.62E-01 | 6.62E+01 |  |  |
| 7974125 | NM_015091   | FAM179B   | family with sequence similarity 17   | 0.044  | 1.031 | 8.64E-01 | 8.64E+01 |  |  |
| 7974146 | NM_017922   | PRPF39    | PRP39 pre-mRNA processing facto      | -0.003 | 0.998 | 9.88E-01 | 9.88E+01 |  |  |
| 7974190 | NM_145261   | DNAJC19   | DnaJ (Hsp40) homolog, subfamily      | 0.015  | 1.011 | 9.33E-01 | 9.33E+01 |  |  |
| 7974194 | ---         | ---       | ---                                  | -0.048 | 0.967 | 7.89E-01 | 7.89E+01 |  |  |
| 7974198 | NM_152329   | PPIL5     | peptidylprolyl isomerase (cycloph    | 0.111  | 1.080 | 5.41E-01 | 5.41E+01 |  |  |
| 7974207 | NM_002408   | MGAT2     | mannosyl (alpha-1,6-)-glycoprotei    | 0.086  | 1.061 | 5.91E-01 | 5.91E+01 |  |  |
| 7974214 | NM_172193   | KLHDC1    | kelch domain containing 1            | -0.005 | 0.997 | 9.89E-01 | 9.89E+01 |  |  |
| 7974229 | NM_014315   | KLHDC2    | kelch domain containing 2            | -0.021 | 0.985 | 9.22E-01 | 9.22E+01 |  |  |
| 7974245 | ---         | ---       | ---                                  | 0.091  | 1.065 | 8.27E-01 | 8.27E+01 |  |  |
| 7974247 | ---         | ---       | ---                                  | 0.205  | 1.153 | 4.55E-01 | 4.55E+01 |  |  |
| 7974249 | NM_001663   | ARF6      | ADP-ribosylation factor 6            | -0.054 | 0.963 | 6.34E-01 | 6.34E+01 |  |  |
| 7974253 | ---         | ---       | ---                                  | -0.058 | 0.960 | 7.05E-01 | 7.05E+01 |  |  |
| 7974255 | ---         | ---       | ---                                  | -0.082 | 0.945 | 7.05E-01 | 7.05E+01 |  |  |
| 7974257 | NM_015684   | ATP5S     | ATP synthase, H+ transporting, mi    | 0.163  | 1.119 | 5.45E-02 | 5.45E+00 |  |  |
| 7974303 | NM_030755   | TMX1      | thioredoxin-related transmembran     | 0.051  | 1.036 | 7.21E-01 | 7.21E+01 |  |  |
| 7974314 | ---         | ---       | ---                                  | 0.141  | 1.102 | 7.52E-01 | 7.52E+01 |  |  |
| 7974339 | ---         | ---       | ---                                  | 0.025  | 1.018 | 8.71E-01 | 8.71E+01 |  |  |
| 7974341 | NM_053064   | GNG2      | guanine nucleotide binding protei    | -0.256 | 0.838 | 1.44E-01 | 1.44E+01 |  |  |
| 7974352 | NM_016039   | C14orf166 | chromosome 14 open reading frar      | 0.001  | 1.001 | 9.95E-01 | 9.95E+01 |  |  |
| 7974363 | NM_000953   | PTGDR     | prostaglandin D2 receptor (DP)       | 0.173  | 1.128 | 4.31E-01 | 4.31E+01 |  |  |
| 7974380 | NM_002806   | PSMC6     | proteasome (prosome, macropain       | -0.011 | 0.993 | 9.53E-01 | 9.53E+01 |  |  |
| 7974387 | NM_145251   | STYX      | serine/threonine/tyrosine interact   | 0.086  | 1.062 | 4.29E-01 | 4.29E+01 |  |  |
| 7974425 | NM_015589   | SAMD4A    | sterile alpha motif domain contain   | 0.204  | 1.152 | 1.48E-02 | 1.48E+00 |  |  |
| 7974455 | NM_144578   | MAPK1IP1L | mitogen-activated protein kinase     | 0.089  | 1.063 | 2.37E-01 | 2.37E+01 |  |  |
| 7974471 | ---         | ---       | ---                                  | 0.055  | 1.039 | 8.64E-01 | 8.64E+01 |  |  |
| 7974473 | NM_017943   | FBXO34    | F-box protein 34                     | -0.086 | 0.942 | 3.72E-01 | 3.72E+01 |  |  |
| 7974479 | ---         | ---       | ---                                  | -0.075 | 0.949 | 6.54E-01 | 6.54E+01 |  |  |
| 7974481 | ---         | ---       | ---                                  | -0.072 | 0.951 | 4.98E-01 | 4.98E+01 |  |  |
| 7974483 | NM_182926   | KTN1      | kinctin 1 (kinesin receptor)         | -0.119 | 0.921 | 4.06E-02 | 4.06E+00 |  |  |
| 7974531 | NR_004844   | RPL13AP3  | ribosomal protein L13a pseudoge      | 0.021  | 1.015 | 9.15E-01 | 9.15E+01 |  |  |
| 7974533 | NM_021255   | PELI2     | pellino homolog 2 (Drosophila)       | 0.093  | 1.067 | 3.07E-01 | 3.07E+01 |  |  |
| 7974542 | NM_017799   | C14orf101 | chromosome 14 open reading frar      | 0.122  | 1.088 | 1.84E-01 | 1.84E+01 |  |  |
| 7974566 | NM_018229   | MUDENG    | MU-2/AP1M2 domain containing,        | 0.006  | 1.004 | 9.83E-01 | 9.83E+01 |  |  |
| 7974576 | NM_00101171 | NAT12     | N-acetyltransferase 12 (GCN5-rela    | -0.083 | 0.944 | 4.26E-01 | 4.26E+01 |  |  |
| 7974585 | ---         | ---       | ---                                  | 0.075  | 1.054 | 4.29E-01 | 4.29E+01 |  |  |
| 7974587 | NM_018477   | ACTR10    | actin-related protein 10 homolog     | 0.016  | 1.011 | 9.41E-01 | 9.41E+01 |  |  |
| 7974603 | NM_002788   | PSMA3     | proteasome (prosome, macropain       | -0.011 | 0.993 | 9.63E-01 | 9.63E+01 |  |  |
| 7974617 | ---         | ---       | ---                                  | 0.093  | 1.067 | 6.78E-01 | 6.78E+01 |  |  |
| 7974619 | ---         | ---       | ---                                  | 0.140  | 1.102 | 3.09E-01 | 3.09E+01 |  |  |
| 7974621 | NM_002892   | ARID4A    | AT rich interactive domain 4A (RBI   | 0.001  | 1.001 | 9.95E-01 | 9.95E+01 |  |  |

|         |             |           |                                      |        |       |          |          |  |  |
|---------|-------------|-----------|--------------------------------------|--------|-------|----------|----------|--|--|
| 7974653 | NM_014749   | KIAA0586  | KIAA0586                             | -0.011 | 0.993 | 9.66E-01 | 9.66E+01 |  |  |
| 7974689 | NM_016651   | DACT1     | dapper, antagonist of beta-catenin   | 0.216  | 1.161 | 1.25E-01 | 1.25E+01 |  |  |
| 7974725 | NM_016475   | JKAMP     | JNK1/MAPK8-associated membran        | 0.129  | 1.094 | 5.02E-01 | 5.02E+01 |  |  |
| 7974771 | NM_022495   | C14orf135 | chromosome 14 open reading fram      | 0.021  | 1.014 | 9.07E-01 | 9.07E+01 |  |  |
| 7974781 | NM_021003   | PPM1A     | protein phosphatase 1A (formerly     | -0.030 | 0.979 | 8.41E-01 | 8.41E+01 |  |  |
| 7974793 | NM_007374   | SIX6      | SIX homeobox 6                       | -0.060 | 0.959 | 5.49E-01 | 5.49E+01 |  |  |
| 7974799 | NM_002431   | MNAT1     | menage a trois homolog 1, cyclin h   | 0.005  | 1.004 | 9.87E-01 | 9.87E+01 |  |  |
| 7974814 | ---         | ---       | ---                                  | 0.213  | 1.159 | 3.70E-01 | 3.70E+01 |  |  |
| 7974835 | NM_006255   | PRKCH     | protein kinase C, eta                | -0.085 | 0.943 | 5.09E-01 | 5.09E+01 |  |  |
| 7974851 | NM_001530   | HIF1A     | hypoxia inducible factor 1, alpha s  | -0.277 | 0.826 | 1.14E-01 | 1.14E+01 |  |  |
| 7974870 | NM_003082   | SNAPC1    | small nuclear RNA activating comp    | -0.036 | 0.975 | 9.14E-01 | 9.14E+01 |  |  |
| 7974912 | ---         | ---       | ---                                  | 0.140  | 1.102 | 8.47E-01 | 8.47E+01 |  |  |
| 7974914 | ---         | ---       | ---                                  | -0.036 | 0.975 | 8.73E-01 | 8.73E+01 |  |  |
| 7974916 | ---         | ---       | ---                                  | 0.120  | 1.087 | 4.03E-01 | 4.03E+01 |  |  |
| 7974920 | NM_182914   | SYNE2     | spectrin repeat containing, nuclea   | -0.053 | 0.964 | 7.52E-01 | 7.52E+01 |  |  |
| 7975045 | NM_005956   | MTHFD1    | methylenetetrahydrofolate dehyd      | 0.063  | 1.044 | 7.93E-01 | 7.93E+01 |  |  |
| 7975066 | NM_004857   | AKAP5     | A kinase (PKA) anchor protein 5      | -0.030 | 0.979 | 9.62E-01 | 9.62E+01 |  |  |
| 7975068 | NM_00112332 | ZBTB1     | zinc finger and BTB domain contai    | -0.077 | 0.948 | 5.17E-01 | 5.17E+01 |  |  |
| 7975095 | NM_015549   | PLEKHG3   | pleckstrin homology domain conta     | 0.033  | 1.023 | 8.62E-01 | 8.62E+01 |  |  |
| 7975121 | NM_002028   | FNTB      | farnesyltransferase, CAAX box, bet   | -0.095 | 0.937 | 3.98E-01 | 3.98E+01 |  |  |
| 7975136 | NM_178155   | FUT8      | fucosyltransferase 8 (alpha (1,6) fu | 0.115  | 1.083 | 3.16E-01 | 3.16E+01 |  |  |
| 7975167 | NM_020806   | GPHN      | gephyrin                             | -0.011 | 0.992 | 9.70E-01 | 9.70E+01 |  |  |
| 7975224 | NM_004094   | EIF2S1    | eukaryotic translation initiation fa | 0.112  | 1.081 | 2.99E-01 | 2.99E+01 |  |  |
| 7975268 | NM_001172   | ARG2      | arginase, type II                    | 0.016  | 1.011 | 9.37E-01 | 9.37E+01 |  |  |
| 7975292 | NM_002877   | RAD51L1   | RAD51-like 1 (S. cerevisiae)         | 0.071  | 1.050 | 8.06E-01 | 8.06E+01 |  |  |
| 7975309 | ---         | ---       | ---                                  | 0.071  | 1.050 | 8.05E-01 | 8.05E+01 |  |  |
| 7975311 | NM_018199   | EXD2      | exonuclease 3'-5' domain containi    | -0.107 | 0.929 | 1.85E-01 | 1.85E+01 |  |  |
| 7975324 | NM_020692   | GALNTL1   | UDP-N-acetyl-alpha-D-galactosam      | 0.025  | 1.017 | 8.80E-01 | 8.80E+01 |  |  |
| 7975344 | NM_018375   | SLC39A9   | solute carrier family 39 (zinc trans | 0.054  | 1.038 | 7.42E-01 | 7.42E+01 |  |  |
| 7975361 | NM_014734   | KIAA0247  | KIAA0247                             | 0.048  | 1.034 | 8.17E-01 | 8.17E+01 |  |  |
| 7975368 | NM_00103946 | SFRS5     | splicing factor, arginine/serine-ric | -0.016 | 0.989 | 8.71E-01 | 8.71E+01 |  |  |
| 7975386 | ---         | ---       | ---                                  | -0.106 | 0.929 | 8.89E-01 | 8.89E+01 |  |  |
| 7975390 | NM_00103485 | SMOC1     | SPARC related modular calcium bi     | 0.034  | 1.024 | 7.71E-01 | 7.71E+01 |  |  |
| 7975410 | ---         | ---       | ---                                  | 0.038  | 1.027 | 8.47E-01 | 8.47E+01 |  |  |
| 7975412 | NM_015351   | TTC9      | tetratricopeptide repeat domain 9    | -0.009 | 0.994 | 9.66E-01 | 9.66E+01 |  |  |
| 7975416 | NM_014982   | PCNX      | pecanex homolog (Drosophila)         | 0.024  | 1.017 | 9.10E-01 | 9.10E+01 |  |  |
| 7975453 | NR_001276   | SNORD56B  | small nucleolar RNA, C/D box 56B     | 0.167  | 1.123 | 5.76E-01 | 5.76E+01 |  |  |
| 7975455 | ---         | ---       | ---                                  | 0.207  | 1.154 | 3.75E-01 | 3.75E+01 |  |  |
| 7975457 | ---         | ---       | ---                                  | 0.079  | 1.056 | 6.10E-01 | 6.10E+01 |  |  |
| 7975459 | NM_015556   | SIPA1L1   | signal-induced proliferation-associ  | 0.009  | 1.006 | 9.77E-01 | 9.77E+01 |  |  |
| 7975506 | NM_015604   | DCAF4     | DDB1 and CUL4 associated factor      | -0.016 | 0.989 | 9.56E-01 | 9.56E+01 |  |  |
| 7975521 | NM_021239   | RBM25     | RNA binding motif protein 25         | -0.027 | 0.981 | 8.18E-01 | 8.18E+01 |  |  |
| 7975545 | NM_000021   | PSEN1     | presenilin 1                         | 0.123  | 1.089 | 3.64E-01 | 3.64E+01 |  |  |
| 7975562 | NM_173462   | PAPLN     | papilin, proteoglycan-like sulfated  | -0.072 | 0.951 | 2.98E-01 | 2.98E+01 |  |  |
| 7975595 | NM_024644   | C14orf169 | chromosome 14 open reading fram      | -0.003 | 0.998 | 9.90E-01 | 9.90E+01 |  |  |
| 7975598 | NM_00103716 | ACOT1     | acyl-CoA thioesterase 1              | 0.023  | 1.016 | 9.44E-01 | 9.44E+01 |  |  |
| 7975602 | NM_006821   | ACOT2     | acyl-CoA thioesterase 2              | 0.024  | 1.017 | 9.25E-01 | 9.25E+01 |  |  |
| 7975626 | NM_194278   | C14orf43  | chromosome 14 open reading fram      | -0.059 | 0.960 | 6.80E-01 | 6.80E+01 |  |  |
| 7975632 | NM_152444   | PTGR2     | prostaglandin reductase 2            | 0.163  | 1.119 | 4.13E-01 | 4.13E+01 |  |  |
| 7975645 | NM_021188   | ZNF410    | zinc finger protein 410              | -0.012 | 0.992 | 9.56E-01 | 9.56E+01 |  |  |
| 7975661 | NM_182476   | COQ6      | coenzyme Q6 homolog, monooxyg        | 0.014  | 1.010 | 9.49E-01 | 9.49E+01 |  |  |
| 7975687 | NM_00102467 | LIN52     | lin-52 homolog (C. elegans)          | -0.010 | 0.993 | 9.74E-01 | 9.74E+01 |  |  |
| 7975696 | NM_182894   | VSX2      | visual system homeobox 2             | 0.010  | 1.007 | 9.47E-01 | 9.47E+01 |  |  |
| 7975705 | NM_194279   | ISCA2     | iron-sulfur cluster assembly 2 hom   | 0.036  | 1.025 | 8.52E-01 | 8.52E+01 |  |  |
| 7975725 | NM_019589   | YLPM1     | YLP motif containing 1               | -0.011 | 0.993 | 9.53E-01 | 9.53E+01 |  |  |
| 7975747 | NM_001933   | DLST      | dihydrolipoamide S-succinyltransf    | -0.091 | 0.939 | 3.71E-01 | 3.71E+01 |  |  |
| 7975760 | NM_014239   | EIF2B2    | eukaryotic translation initiation fa | 0.088  | 1.063 | 5.53E-01 | 5.53E+01 |  |  |
| 7975779 | NM_005252   | FOS       | FBJ murine osteosarcoma viral on     | -0.276 | 0.826 | 3.94E-02 | 3.94E+00 |  |  |
| 7975787 | NM_00113504 | JDP2      | Jun dimerization protein 2           | 0.005  | 1.004 | 9.76E-01 | 9.76E+01 |  |  |
| 7975793 | NM_006399   | BATF      | basic leucine zipper transcription f | -0.004 | 0.997 | 9.90E-01 | 9.90E+01 |  |  |
| 7975815 | NM_015072   | TTL5      | tubulin tyrosine ligase-like family, | -0.107 | 0.929 | 2.99E-01 | 2.99E+01 |  |  |
| 7975863 | NM_017926   | C14orf118 | chromosome 14 open reading fram      | -0.076 | 0.949 | 5.95E-01 | 5.95E+01 |  |  |
| 7975889 | NM_014909   | VASH1     | vasohibin 1                          | -0.002 | 0.998 | 9.90E-01 | 9.90E+01 |  |  |
| 7975924 | ---         | ---       | ---                                  | -0.050 | 0.966 | 6.37E-01 | 6.37E+01 |  |  |
| 7975926 | NM_033426   | KIAA1737  | KIAA1737                             | -0.024 | 0.984 | 8.82E-01 | 8.82E+01 |  |  |
| 7975956 | NM_001513   | GSTZ1     | glutathione transferase zeta 1       | 0.010  | 1.007 | 9.64E-01 | 9.64E+01 |  |  |
| 7975976 | NM_012111   | AHSA1     | AHA1, activator of heat shock 90k    | -0.012 | 0.992 | 9.55E-01 | 9.55E+01 |  |  |
| 7975989 | NM_031210   | C14orf156 | chromosome 14 open reading fram      | 0.112  | 1.081 | 5.77E-01 | 5.77E+01 |  |  |
| 7975995 | BC113929    | C14orf178 | chromosome 14 open reading fram      | -0.137 | 0.909 | 1.38E-01 | 1.38E+01 |  |  |
| 7976053 | ---         | ---       | ---                                  | 0.280  | 1.215 | 1.06E-01 | 1.06E+01 |  |  |
| 7976069 | ---         | ---       | ---                                  | -0.038 | 0.974 | 8.46E-01 | 8.46E+01 |  |  |
| 7976080 | NM_003608   | GPR65     | G protein-coupled receptor 65        | 0.292  | 1.224 | 8.58E-02 | 8.58E+00 |  |  |
| 7976101 | NM_024824   | ZC3H14    | zinc finger CCCH-type containing 1   | 0.037  | 1.026 | 7.63E-01 | 7.63E+01 |  |  |
| 7976148 | NR_024620   | PRO1768   | PRO1768                              | 0.054  | 1.038 | 8.49E-01 | 8.49E+01 |  |  |
| 7976152 | ---         | ---       | ---                                  | 0.053  | 1.037 | 8.59E-01 | 8.59E+01 |  |  |
| 7976158 | ---         | ---       | ---                                  | -0.102 | 0.932 | 4.80E-01 | 4.80E+01 |  |  |
| 7976160 | NM_018319   | TDP1      | tyrosyl-DNA phosphodiesterase 1      | -0.053 | 0.964 | 8.05E-01 | 8.05E+01 |  |  |

|         |             |           |                                      |        |       |          |          |  |
|---------|-------------|-----------|--------------------------------------|--------|-------|----------|----------|--|
| 7976182 | NM_022054   | KCNK13    | potassium channel, subfamily K, m    | -0.040 | 0.973 | 7.51E-01 | 7.51E+01 |  |
| 7976189 | NM_002802   | PSMC1     | proteasome (prosome, macropain       | -0.030 | 0.979 | 8.93E-01 | 8.93E+01 |  |
| 7976200 | NM_006888   | CALM1     | calmodulin 1 (phosphorylase kinas    | 0.023  | 1.016 | 7.89E-01 | 7.89E+01 |  |
| 7976216 | NM_00110236 | C14orf159 | chromosome 14 open reading fram      | -0.002 | 0.999 | 9.93E-01 | 9.93E+01 |  |
| 7976239 | AF170294    | PTMAP7    | prothymosin, alpha pseudogene 7      | -0.041 | 0.972 | 7.83E-01 | 7.83E+01 |  |
| 7976243 | NM_017437   | CPSF2     | cleavage and polyadenylation spe     | 0.087  | 1.062 | 3.41E-01 | 3.41E+01 |  |
| 7976292 | NM_024832   | RIN3      | Ras and Rab interactor 3             | -0.029 | 0.980 | 8.44E-01 | 8.44E+01 |  |
| 7976307 | NM_005113   | GOLGA5    | golgi autoantigen, golgin subfamili  | 0.094  | 1.067 | 4.73E-01 | 4.73E+01 |  |
| 7976333 | NM_015676   | C14orf109 | chromosome 14 open reading fram      | 0.058  | 1.041 | 7.60E-01 | 7.60E+01 |  |
| 7976407 | BC009073    | FAM181A   | family with sequence similarity 18   | 0.022  | 1.016 | 8.45E-01 | 8.45E+01 |  |
| 7976425 | NM_023112   | OTUB2     | OTU domain, ubiquitin aldehyde b     | -0.062 | 0.958 | 7.49E-01 | 7.49E+01 |  |
| 7976436 | NM_145249   | IFI27L1   | interferon, alpha-inducible protei   | -0.056 | 0.962 | 6.45E-01 | 6.45E+01 |  |
| 7976443 | NM_00113008 | IFI27     | interferon, alpha-inducible protei   | 0.309  | 1.239 | 4.44E-01 | 4.44E+01 |  |
| 7976506 | NR_015340   | SERPINA13 | serpin peptidase inhibitor, clade A  | -0.063 | 0.958 | 6.34E-01 | 6.34E+01 |  |
| 7976512 | NR_015415   | FLJ45244  | hypothetical locus FLJ45244          | 0.003  | 1.002 | 9.89E-01 | 9.89E+01 |  |
| 7976515 | NM_016417   | GLRX5     | glutaredoxin 5                       | -0.008 | 0.994 | 9.61E-01 | 9.61E+01 |  |
| 7976556 | NR_023938   | C14orf132 | chromosome 14 open reading fram      | -0.112 | 0.926 | 3.38E-01 | 3.38E+01 |  |
| 7976560 | NM_000623   | BDKRB2    | bradykinin receptor B2               | -0.047 | 0.968 | 7.71E-01 | 7.71E+01 |  |
| 7976598 | NM_032632   | PAPOLA    | poly(A) polymerase alpha             | 0.032  | 1.022 | 7.98E-01 | 7.98E+01 |  |
| 7976621 | NM_003384   | VRK1      | vaccinia related kinase 1            | -0.003 | 0.998 | 9.89E-01 | 9.89E+01 |  |
| 7976635 | BC093661    | C14orf177 | chromosome 14 open reading fram      | 0.028  | 1.019 | 8.45E-01 | 8.45E+01 |  |
| 7976642 | ---         | ---       | ---                                  | 0.020  | 1.014 | 9.16E-01 | 9.16E+01 |  |
| 7976646 | ---         | ---       | ---                                  | 0.314  | 1.243 | 5.78E-02 | 5.78E+00 |  |
| 7976648 | NM_00109940 | CCNK      | cyclin K                             | 0.035  | 1.025 | 7.51E-01 | 7.51E+01 |  |
| 7976667 | ---         | ---       | ---                                  | -0.032 | 0.978 | 8.41E-01 | 8.41E+01 |  |
| 7976669 | NM_00112725 | HHIP1L    | HHIP-like 1                          | -0.074 | 0.950 | 2.25E-01 | 2.25E+01 |  |
| 7976681 | NM_006668   | CYP46A1   | cytochrome P450, family 46, subfa    | -0.073 | 0.951 | 3.10E-01 | 3.10E+01 |  |
| 7976724 | ---         | ---       | ---                                  | -0.096 | 0.936 | 1.51E-01 | 1.51E+01 |  |
| 7976726 | NM_016337   | EVL       | Enah/Vasp-like                       | 0.058  | 1.041 | 7.04E-01 | 7.04E+01 |  |
| 7976744 | NM_003403   | YY1       | YY1 transcription factor             | -0.056 | 0.962 | 5.17E-01 | 5.17E+01 |  |
| 7976755 | NM_207117   | C14orf68  | chromosome 14 open reading fram      | -0.021 | 0.986 | 8.51E-01 | 8.51E+01 |  |
| 7976766 | NM_024515   | WDR25     | WD repeat domain 25                  | -0.036 | 0.976 | 8.45E-01 | 8.45E+01 |  |
| 7976778 | AK094097    | C14orf70  | chromosome 14 open reading fram      | -0.091 | 0.939 | 4.45E-01 | 4.45E+01 |  |
| 7976783 | NM_003836   | DLK1      | delta-like 1 homolog (Drosophila)    | -0.054 | 0.963 | 6.23E-01 | 6.23E+01 |  |
| 7976795 | NR_003530   | MEG3      | maternally expressed 3 (non-prot     | 0.036  | 1.025 | 7.73E-01 | 7.73E+01 |  |
| 7976804 | ---         | ---       | ---                                  | -0.006 | 0.996 | 9.77E-01 | 9.77E+01 |  |
| 7976808 | ---         | ---       | ---                                  | -0.060 | 0.959 | 7.48E-01 | 7.48E+01 |  |
| 7976828 | AK123165    | FLJ41170  | hypothetical LOC440200               | -0.031 | 0.979 | 8.45E-01 | 8.45E+01 |  |
| 7976844 | ---         | ---       | ---                                  | -0.023 | 0.984 | 9.06E-01 | 9.06E+01 |  |
| 7976863 | NM_00116172 | PPP2R5C   | protein phosphatase 2, regulatory    | -0.180 | 0.883 | 1.17E-02 | 1.17E+00 |  |
| 7976874 | ---         | ---       | ---                                  | -0.249 | 0.842 | 3.20E-01 | 3.20E+01 |  |
| 7976876 | NM_001376   | DYNC1H1   | dynein, cytoplasmic 1, heavy chain   | -0.037 | 0.975 | 7.65E-01 | 7.65E+01 |  |
| 7976957 | NM_181291   | WDR20     | WD repeat domain 20                  | -0.062 | 0.958 | 5.30E-01 | 5.30E+01 |  |
| 7976967 | NM_018335   | ZNF839    | zinc finger protein 839              | -0.065 | 0.956 | 6.57E-01 | 6.57E+01 |  |
| 7976976 | NM_014844   | TECP2     | tectonin beta-propeller repeat co    | -0.073 | 0.950 | 6.63E-01 | 6.63E+01 |  |
| 7977003 | NM_015156   | RCOR1     | REST corepressor 1                   | 0.075  | 1.053 | 5.53E-01 | 5.53E+01 |  |
| 7977018 | NM_145725   | TRAF3     | TNF receptor-associated factor 3     | -0.002 | 0.998 | 9.90E-01 | 9.90E+01 |  |
| 7977033 | NM_030943   | AMN       | amniotless homolog (mouse)           | -0.080 | 0.946 | 2.77E-01 | 2.77E+01 |  |
| 7977046 | NM_006291   | TNFAIP2   | tumor necrosis factor, alpha-induc   | 0.043  | 1.030 | 8.30E-01 | 8.30E+01 |  |
| 7977058 | NM_001969   | EIF5      | eukaryotic translation initiation fa | -0.092 | 0.938 | 4.31E-01 | 4.31E+01 |  |
| 7977077 | NM_00112891 | MARK3     | MAP/microtubule affinity-regulati    | -0.020 | 0.986 | 8.88E-01 | 8.88E+01 |  |
| 7977103 | ---         | ---       | ---                                  | -0.008 | 0.995 | 9.87E-01 | 9.87E+01 |  |
| 7977105 | NM_152307   | TRMT61A   | tRNA methyltransferase 61 homolo     | -0.013 | 0.991 | 9.23E-01 | 9.23E+01 |  |
| 7977119 | NM_032374   | C14orf153 | chromosome 14 open reading fram      | 0.015  | 1.011 | 9.50E-01 | 9.50E+01 |  |
| 7977127 | NM_00113010 | KLC1      | kinesin light chain 1                | -0.011 | 0.993 | 9.50E-01 | 9.50E+01 |  |
| 7977149 | NM_024071   | ZFYVE21   | zinc finger, FYVE domain containi    | 0.032  | 1.022 | 8.45E-01 | 8.45E+01 |  |
| 7977203 | NM_00108046 | ASPG      | asparaginase homolog (S. cerevisi    | -0.056 | 0.962 | 5.84E-01 | 5.84E+01 |  |
| 7977216 | NM_015656   | KIF26A    | kinesin family member 26A            | -0.012 | 0.992 | 9.27E-01 | 9.27E+01 |  |
| 7977234 | BC041103    | C14orf180 | chromosome 14 open reading fram      | -0.051 | 0.965 | 5.73E-01 | 5.73E+01 |  |
| 7977241 | NM_022489   | INF2      | inverted formin, FH2 and WH2 do      | -0.054 | 0.963 | 7.39E-01 | 7.39E+01 |  |
| 7977249 | NM_022489   | INF2      | inverted formin, FH2 and WH2 do      | -0.018 | 0.988 | 9.07E-01 | 9.07E+01 |  |
| 7977270 | AK131040    | LOC388022 | hypothetical gene supported by A     | 0.263  | 1.200 | 6.06E-01 | 6.06E+01 |  |
| 7977273 | NM_152328   | ADSSL1    | adenylosuccinate synthase like 1     | 0.000  | 1.000 | 9.98E-01 | 9.98E+01 |  |
| 7977288 | NM_006427   | SIVA1     | SIVA1, apoptosis-inducing factor     | -0.062 | 0.958 | 5.01E-01 | 5.01E+01 |  |
| 7977294 | NM_00113760 | ZBTB42    | zinc finger and BTB domain contai    | 0.001  | 1.001 | 9.97E-01 | 9.97E+01 |  |
| 7977296 | NR_024396   | MGC23270  | hypothetical LOC196872               | 0.030  | 1.021 | 8.71E-01 | 8.71E+01 |  |
| 7977299 | NM_00111272 | KIAA0284  | KIAA0284                             | -0.040 | 0.973 | 7.81E-01 | 7.81E+01 |  |
| 7977319 | NM_138790   | PLD4      | phospholipase D family, member 4     | 0.002  | 1.002 | 9.88E-01 | 9.88E+01 |  |
| 7977344 | NM_00110091 | PACS2     | phosphofurin acidic cluster sorting  | 0.051  | 1.036 | 7.02E-01 | 7.02E+01 |  |
| 7977371 | NM_00110091 | PACS2     | phosphofurin acidic cluster sorting  | 0.007  | 1.005 | 9.72E-01 | 9.72E+01 |  |
| 7977373 | NM_004689   | MTA1      | metastasis associated 1              | -0.120 | 0.920 | 3.00E-01 | 3.00E+01 |  |
| 7977397 | NM_001312   | CRIP2     | cysteine-rich protein 2              | 0.029  | 1.021 | 7.78E-01 | 7.78E+01 |  |
| 7977409 | NM_001311   | CRIP1     | cysteine-rich protein 1 (intestinal) | -0.040 | 0.973 | 6.74E-01 | 6.74E+01 |  |
| 7977418 | NM_00113487 | C14orf80  | chromosome 14 open reading fram      | -0.032 | 0.978 | 7.92E-01 | 7.92E+01 |  |
| 7977432 | NM_025268   | TMEM121   | transmembrane protein 121            | -0.017 | 0.989 | 8.93E-01 | 8.93E+01 |  |
| 7977435 | ---         | ---       | ---                                  | -0.008 | 0.995 | 9.77E-01 | 9.77E+01 |  |
| 7977438 | ---         | ---       | ---                                  | -0.076 | 0.949 | 5.52E-01 | 5.52E+01 |  |

|         |               |           |                                      |        |       |          |          |
|---------|---------------|-----------|--------------------------------------|--------|-------|----------|----------|
| 7977440 | NR_026800     | KIAA0125  | KIAA0125                             | 0.059  | 1.042 | 7.25E-01 | 7.25E+01 |
| 7977445 | NR_026800     | KIAA0125  | KIAA0125                             | 0.108  | 1.077 | 5.05E-01 | 5.05E+01 |
| 7977452 | ENST00000400  | FLJ39632  | hypothetical LOC642477               | 0.036  | 1.025 | 7.94E-01 | 7.94E+01 |
| 7977454 | NM_00108353   | POTEE     | POTE ankyrin domain family, mem      | 0.091  | 1.065 | 5.24E-01 | 5.24E+01 |
| 7977482 | NM_138376     | TTC5      | tetratricopeptide repeat domain 5    | 0.077  | 1.055 | 6.34E-01 | 6.34E+01 |
| 7977497 | NM_021178     | CCNB1IP1  | cyclin B1 interacting protein 1      | -0.029 | 0.980 | 9.09E-01 | 9.09E+01 |
| 7977507 | NR_002312     | RPPH1     | ribonuclease P RNA component H       | -0.018 | 0.988 | 9.74E-01 | 9.74E+01 |
| 7977511 | NM_007110     | TEP1      | telomerase-associated protein 1      | 0.109  | 1.078 | 3.21E-02 | 3.21E+00 |
| 7977567 | BC146951      | KLHL33    | kelch-like 33 (Drosophila)           | -0.105 | 0.930 | 2.09E-01 | 2.09E+01 |
| 7977571 | NM_017807     | OSGEP     | O-sialoglycoprotein endopeptidas     | 0.203  | 1.151 | 6.92E-02 | 6.92E+00 |
| 7977584 | NM_00110081   | TMEM55B   | transmembrane protein 55B            | -0.038 | 0.974 | 7.72E-01 | 7.72E+01 |
| 7977615 | NM_198232     | RNA5E1    | ribonuclease, RNase A family, 1 (p   | 0.520  | 1.434 | 5.82E-02 | 5.82E+00 |
| 7977621 | NM_201540     | NDRG2     | NDRG family member 2                 | -0.047 | 0.968 | 6.88E-01 | 6.88E+01 |
| 7977646 | NM_016423     | ZNF219    | zinc finger protein 219              | 0.011  | 1.008 | 9.56E-01 | 9.56E+01 |
| 7977653 | ---           | ---       | ---                                  | 0.088  | 1.063 | 2.27E-01 | 2.27E+01 |
| 7977655 | NM_00100473   | OR5AU1    | olfactory receptor, family 5, subfa  | 0.065  | 1.046 | 5.34E-01 | 5.34E+01 |
| 7977657 | NM_031314     | HNRNPC    | heterogeneous nuclear ribonucleo     | 0.007  | 1.005 | 9.62E-01 | 9.62E+01 |
| 7977674 | NM_007192     | SUPT16H   | suppressor of Ty 16 homolog (S. ce   | -0.016 | 0.989 | 9.44E-01 | 9.44E+01 |
| 7977693 | NM_020920     | CHD8      | chromodomain helicase DNA bindi      | -0.068 | 0.954 | 4.47E-01 | 4.47E+01 |
| 7977732 | NR_002916     | SNORD8    | small nucleolar RNA, C/D box 8       | -0.013 | 0.991 | 9.73E-01 | 9.73E+01 |
| 7977734 | ---           | ---       | ---                                  | 0.073  | 1.052 | 4.43E-01 | 4.43E+01 |
| 7977736 | NM_032846     | RAB2B     | RAB2B, member RAS oncogene fa        | -0.017 | 0.989 | 9.39E-01 | 9.39E+01 |
| 7977749 | NM_019852     | METTL3    | methyltransferase like 3             | -0.032 | 0.978 | 8.01E-01 | 8.01E+01 |
| 7977761 | NM_005407     | SALL2     | sal-like 2 (Drosophila)              | -0.055 | 0.962 | 7.07E-01 | 7.07E+01 |
| 7977773 | ---           | ---       | ---                                  | 0.000  | 1.000 | 1.00E+00 | 1.00E+02 |
| 7977775 | NM_001344     | DAD1      | defender against cell death 1        | 0.017  | 1.012 | 9.61E-01 | 9.61E+01 |
| 7977780 | NM_022060     | ABHD4     | abhydrolase domain containing 4      | -0.007 | 0.995 | 9.70E-01 | 9.70E+01 |
| 7977782 | ENST000000312 | OR6J1     | olfactory receptor, family 6, subfa  | -0.026 | 0.982 | 7.92E-01 | 7.92E+01 |
| 7977786 | NM_003982     | SLC7A7    | solute carrier family 7 (cationic an | -0.178 | 0.884 | 7.08E-01 | 7.08E+01 |
| 7977803 | NM_00107735   | RBM23     | RNA binding motif protein 23         | -0.096 | 0.935 | 4.81E-01 | 4.81E+01 |
| 7977820 | NM_00103961   | PRMT5     | protein arginine methyltransferas    | -0.053 | 0.964 | 8.36E-01 | 8.36E+01 |
| 7977841 | NM_017815     | HAUS4     | HAUS augmin-like complex, subun      | 0.029  | 1.020 | 8.98E-01 | 8.98E+01 |
| 7977868 | NM_021944     | C14orf93  | chromosome 14 open reading fran      | 0.067  | 1.048 | 5.59E-01 | 5.59E+01 |
| 7977879 | NM_00114493   | PSMB5     | proteasome (prosome, macropain       | -0.048 | 0.967 | 8.06E-01 | 8.06E+01 |
| 7977888 | NM_022478     | CDH24     | cadherin-like 24                     | 0.022  | 1.016 | 8.58E-01 | 8.58E+01 |
| 7977906 | NM_014977     | ACIN1     | apoptotic chromatin condensator      | 0.038  | 1.026 | 6.57E-01 | 6.57E+01 |
| 7977928 | NM_001805     | CEBPE     | CCAAT/enhancer binding protein (     | 0.072  | 1.051 | 5.73E-01 | 5.73E+01 |
| 7977955 | NR_026862     | PPP1R3E   | protein phosphatase 1, regulatory    | -0.024 | 0.984 | 8.50E-01 | 8.50E+01 |
| 7977965 | NM_016609     | SLC22A17  | solute carrier family 22, member 1   | 0.005  | 1.004 | 9.73E-01 | 9.73E+01 |
| 7977978 | NM_005864     | EFS       | embryonal Fyn-associated substra     | -0.049 | 0.967 | 6.08E-01 | 6.08E+01 |
| 7977987 | NM_002471     | MYH6      | myosin, heavy chain 6, cardiac mu    | -0.054 | 0.963 | 6.19E-01 | 6.19E+01 |
| 7978054 | ---           | ---       | ---                                  | -0.007 | 0.995 | 9.76E-01 | 9.76E+01 |
| 7978056 | BC144336      | ZFH2      | zinc finger homeobox 2               | -0.067 | 0.955 | 4.27E-01 | 4.27E+01 |
| 7978059 | BC131533      | ZFH2      | zinc finger homeobox 2               | 0.034  | 1.024 | 8.45E-01 | 8.45E+01 |
| 7978064 | ---           | ---       | ---                                  | 0.014  | 1.010 | 9.53E-01 | 9.53E+01 |
| 7978066 | NM_003917     | AP1G2     | adaptor-related protein complex 1    | -0.078 | 0.947 | 3.61E-01 | 3.61E+01 |
| 7978093 | NM_032452     | JPH4      | junctionophilin 4                    | -0.044 | 0.970 | 7.22E-01 | 7.22E+01 |
| 7978107 | NM_006177     | NRL       | neural retina leucine zipper         | -0.048 | 0.968 | 7.36E-01 | 7.36E+01 |
| 7978114 | BC002491      | FAM158A   | family with sequence similarity 15   | 0.010  | 1.007 | 9.67E-01 | 9.67E+01 |
| 7978123 | NM_002818     | PSME2     | proteasome (prosome, macropain       | 0.155  | 1.113 | 4.14E-01 | 4.14E+01 |
| 7978132 | NM_024658     | IPO4      | importin 4                           | -0.102 | 0.932 | 2.78E-01 | 2.78E+01 |
| 7978166 | NM_006405     | TM9SF1    | transmembrane 9 superfamily me       | -0.115 | 0.923 | 3.10E-01 | 3.10E+01 |
| 7978174 | NM_014169     | CHMP4A    | chromatin modifying protein 4A       | 0.030  | 1.021 | 8.03E-01 | 8.03E+01 |
| 7978187 | NM_014169     | CHMP4A    | chromatin modifying protein 4A       | 0.058  | 1.041 | 5.04E-01 | 5.04E+01 |
| 7978192 | NM_138476     | MDP1      | magnesium-dependent phosphata        | -0.027 | 0.981 | 9.22E-01 | 9.22E+01 |
| 7978201 | NM_006156     | NEDD8     | neural precursor cell expressed, d   | 0.030  | 1.021 | 8.46E-01 | 8.46E+01 |
| 7978208 | NM_012461     | TINF2     | TERF1 (TRF1)-interacting nuclear f   | 0.050  | 1.035 | 7.06E-01 | 7.06E+01 |
| 7978222 | NM_000359     | TGM1      | transglutaminase 1 (K polypeptide    | -0.039 | 0.973 | 7.59E-01 | 7.59E+01 |
| 7978239 | NM_004581     | RABGGTA   | Rab geranylgeranyltransferase, alp   | -0.066 | 0.956 | 4.06E-01 | 4.06E+01 |
| 7978260 | NM_00113605   | DHRS1     | dehydrogenase/reductase (SDR fa      | 0.029  | 1.020 | 9.24E-01 | 9.24E+01 |
| 7978272 | NM_014430     | CIDEB     | cell death-inducing DFFA-like effec  | 0.004  | 1.003 | 9.85E-01 | 9.85E+01 |
| 7978285 | NM_139247     | ADCY4     | adenylate cyclase 4                  | -0.035 | 0.976 | 7.95E-01 | 7.95E+01 |
| 7978312 | NM_006871     | RIPK3     | receptor-interacting serine-threon   | -0.037 | 0.975 | 8.40E-01 | 8.40E+01 |
| 7978331 | NM_00103977   | CBLN3     | cerebellin 3 precursor               | -0.123 | 0.918 | 3.92E-01 | 3.92E+01 |
| 7978335 | NM_020195     | SDR39U1   | short chain dehydrogenase/reduct     | 0.001  | 1.001 | 9.97E-01 | 9.97E+01 |
| 7978360 | NM_033423     | GZMH      | granzyme H (cathepsin G-like 2, pr   | 0.004  | 1.003 | 9.92E-01 | 9.92E+01 |
| 7978366 | NM_004131     | GZMB      | granzyme B (granzyme 2, cytotoxic    | -0.241 | 0.846 | 5.73E-01 | 5.73E+01 |
| 7978389 | ---           | ---       | ---                                  | 0.002  | 1.001 | 9.94E-01 | 9.94E+01 |
| 7978428 | NM_00108389   | STRN3     | striatin, calmodulin binding protei  | -0.056 | 0.962 | 6.41E-01 | 6.41E+01 |
| 7978449 | NM_015382     | HECTD1    | HECT domain containing 1             | 0.016  | 1.011 | 9.28E-01 | 9.28E+01 |
| 7978492 | NM_015473     | HEATR5A   | HEAT repeat containing 5A            | 0.245  | 1.185 | 6.43E-02 | 6.43E+00 |
| 7978527 | NM_080664     | C14orf126 | chromosome 14 open reading fran      | 0.124  | 1.090 | 3.47E-01 | 3.47E+01 |
| 7978534 | ---           | ---       | ---                                  | 0.146  | 1.106 | 6.57E-01 | 6.57E+01 |
| 7978538 | NR_027263     | C14orf128 | chromosome 14 open reading fran      | -0.046 | 0.969 | 7.79E-01 | 7.79E+01 |
| 7978542 | NM_020696     | KIAA1143  | KIAA1143                             | 0.020  | 1.014 | 9.49E-01 | 9.49E+01 |
| 7978544 | NM_022073     | EGLN3     | egl nine homolog 3 (C. elegans)      | -0.018 | 0.988 | 9.28E-01 | 9.28E+01 |
| 7978553 | NM_138288     | C14orf147 | chromosome 14 open reading fran      | 0.200  | 1.148 | 1.37E-01 | 1.37E+01 |

|         |             |           |                                     |        |       |          |          |  |
|---------|-------------|-----------|-------------------------------------|--------|-------|----------|----------|--|
| 7978558 | NM_018453   | EAPP      | E2F-associated phosphoprotein       | 0.038  | 1.026 | 8.21E-01 | 8.21E+01 |  |
| 7978570 | NM_021249   | SNX6      | sorting nexin 6                     | 0.267  | 1.203 | 4.66E-03 | 4.66E-01 |  |
| 7978595 | NM_013448   | BAZ1A     | bromodomain adjacent to zinc fin    | 0.139  | 1.101 | 4.39E-02 | 4.39E+00 |  |
| 7978626 | ---         | ---       | ---                                 | 0.178  | 1.131 | 8.12E-01 | 8.12E+01 |  |
| 7978628 | NM_017917   | PPP2R3C   | protein phosphatase 2 (formerly 2   | -0.002 | 0.999 | 9.94E-01 | 9.94E+01 |  |
| 7978653 | NM_014990   | GARNL1    | GTPase activating Rap/RanGAP do     | -0.143 | 0.906 | 4.18E-01 | 4.18E+01 |  |
| 7978662 | ---         | ---       | ---                                 | 0.011  | 1.007 | 9.85E-01 | 9.85E+01 |  |
| 7978666 | NM_016586   | MBIP      | MAP3K12 binding inhibitory prote    | 0.072  | 1.051 | 6.31E-01 | 6.31E+01 |  |
| 7978706 | NM_004496   | FOXA1     | forkhead box A1                     | 0.018  | 1.013 | 9.00E-01 | 9.00E+01 |  |
| 7978710 | ---         | ---       | ---                                 | 0.145  | 1.105 | 1.27E-01 | 1.27E+01 |  |
| 7978718 | NM_006364   | SEC23A    | Sec23 homolog A (S. cerevisiae)     | 0.047  | 1.033 | 7.73E-01 | 7.73E+01 |  |
| 7978739 | NM_00107953 | TRAPPC6B  | trafficking protein particle comple | -0.100 | 0.933 | 4.42E-01 | 4.42E+01 |  |
| 7978748 | NM_203301   | FBXO33    | F-box protein 33                    | -0.119 | 0.921 | 1.32E-01 | 1.32E+01 |  |
| 7978754 | NM_014267   | C11orf58  | chromosome 11 open reading fram     | 0.032  | 1.022 | 7.76E-01 | 7.76E+01 |  |
| 7978760 | NM_017658   | KLHL28    | kelch-like 28 (Drosophila)          | 0.038  | 1.027 | 8.39E-01 | 8.39E+01 |  |
| 7978766 | NM_002013   | FKBP3     | FK506 binding protein 3, 25kDa      | -0.034 | 0.976 | 7.68E-01 | 7.68E+01 |  |
| 7978776 | NM_018353   | C14orf106 | chromosome 14 open reading fram     | 0.223  | 1.167 | 5.36E-02 | 5.36E+00 |  |
| 7978795 | NM_080746   | RPL10L    | ribosomal protein L10-like          | -0.050 | 0.966 | 6.12E-01 | 6.12E+01 |  |
| 7978824 | NM_00103000 | RPS29     | ribosomal protein S29               | 0.033  | 1.023 | 8.49E-01 | 8.49E+01 |  |
| 7978831 | NM_152329   | PPIL5     | peptidylprolyl isomerase (cyclophi  | 0.041  | 1.029 | 8.16E-01 | 8.16E+01 |  |
| 7978833 | NM_001001   | RPL36AL   | ribosomal protein L36a-like         | -0.077 | 0.948 | 3.05E-01 | 3.05E+01 |  |
| 7978838 | NM_018139   | C14orf104 | chromosome 14 open reading fram     | -0.016 | 0.989 | 9.65E-01 | 9.65E+01 |  |
| 7978866 | NM_004713   | SDCCAG1   | serologically defined colon cancer  | 0.005  | 1.003 | 9.84E-01 | 9.84E+01 |  |
| 7978905 | ---         | ---       | ---                                 | -0.045 | 0.969 | 8.66E-01 | 8.66E+01 |  |
| 7978909 | ---         | ---       | ---                                 | 0.062  | 1.044 | 7.12E-01 | 7.12E+01 |  |
| 7978911 | NM_00101270 | C14orf182 | chromosome 14 open reading fram     | -0.165 | 0.892 | 3.67E-01 | 3.67E+01 |  |
| 7978917 | NM_00101483 | LOC196913 | hypothetical protein LOC196913      | -0.131 | 0.913 | 4.43E-01 | 4.43E+01 |  |
| 7978932 | NM_006939   | SOS2      | son of sevenless homolog 2 (Dros    | -0.086 | 0.942 | 5.03E-01 | 5.03E+01 |  |
| 7978956 | NM_024884   | L2HGDH    | L-2-hydroxyglutarate dehydrogen     | 0.067  | 1.048 | 5.48E-01 | 5.48E+01 |  |
| 7978970 | NM_004196   | CDKL1     | cyclin-dependent kinase-like 1 (CD  | 0.021  | 1.015 | 9.16E-01 | 9.16E+01 |  |
| 7978997 | NM_198794   | MAP4K5    | mitogen-activated protein kinase    | -0.032 | 0.978 | 8.47E-01 | 8.47E+01 |  |
| 7979033 | NM_021818   | SAV1      | salvador homolog 1 (Drosophila)     | -0.031 | 0.979 | 9.19E-01 | 9.19E+01 |  |
| 7979044 | NM_020921   | NIN       | ninein (GSK3B interacting protein)  | 0.055  | 1.039 | 5.83E-01 | 5.83E+01 |  |
| 7979085 | NM_002863   | PYGL      | phosphorylase, glycogen, liver      | 0.271  | 1.206 | 5.53E-01 | 5.53E+01 |  |
| 7979108 | NM_052978   | TRIM9     | tripartite motif-containing 9       | -0.057 | 0.961 | 5.34E-01 | 5.34E+01 |  |
| 7979127 | ---         | ---       | ---                                 | -0.084 | 0.943 | 5.16E-01 | 5.16E+01 |  |
| 7979179 | NM_014584   | ERO1L     | ERO1-like (S. cerevisiae)           | 0.067  | 1.048 | 7.86E-01 | 7.86E+01 |  |
| 7979196 | NM_198066   | GNPNAT1   | glucosamine-phosphate N-acetyltr    | 0.073  | 1.052 | 5.53E-01 | 5.53E+01 |  |
| 7979223 | NM_00116014 | DDHD1     | DDHD domain containing 1            | 0.098  | 1.071 | 3.62E-01 | 3.62E+01 |  |
| 7979250 | NM_005776   | CNIH      | cornichon homolog (Drosophila)      | -0.034 | 0.977 | 8.50E-01 | 8.50E+01 |  |
| 7979260 | NM_004124   | GMFB      | glia maturation factor, beta        | 0.207  | 1.154 | 1.11E-01 | 1.11E+01 |  |
| 7979269 | NM_000161   | GCH1      | GTP cyclohydrolase 1                | 0.152  | 1.111 | 6.51E-01 | 6.51E+01 |  |
| 7979328 | NM_014924   | KIAA0831  | KIAA0831                            | -0.078 | 0.947 | 6.48E-01 | 6.48E+01 |  |
| 7979351 | NR_027123   | C14orf33  | chromosome 14 open reading fram     | -0.053 | 0.964 | 6.95E-01 | 6.95E+01 |  |
| 7979355 | ---         | ---       | ---                                 | -0.009 | 0.994 | 9.54E-01 | 9.54E+01 |  |
| 7979367 | NM_006544   | EXOC5     | exocyst complex component 5         | 0.051  | 1.036 | 7.73E-01 | 7.73E+01 |  |
| 7979412 | ---         | ---       | ---                                 | 0.188  | 1.139 | 4.75E-01 | 4.75E+01 |  |
| 7979426 | NM_022571   | GPR135    | G protein-coupled receptor 135      | 0.044  | 1.031 | 6.60E-01 | 6.60E+01 |  |
| 7979437 | NM_144581   | C14orf149 | chromosome 14 open reading fram     | 0.035  | 1.025 | 9.19E-01 | 9.19E+01 |  |
| 7979473 | NM_016029   | DHRS7     | dehydrogenase/reductase (SDR fa     | -0.218 | 0.860 | 1.74E-01 | 1.74E+01 |  |
| 7979510 | NM_017420   | SIX4      | SIX homeobox 4                      | 0.035  | 1.024 | 7.57E-01 | 7.57E+01 |  |
| 7979516 | NM_020810   | TRMT5     | TRM5 tRNA methyltransferase 5 h     | 0.135  | 1.098 | 1.36E-01 | 1.36E+01 |  |
| 7979548 | NM_145171   | GPHB5     | glycoprotein hormone beta 5         | -0.015 | 0.990 | 9.34E-01 | 9.34E+01 |  |
| 7979551 | NM_006246   | PPP2R5E   | protein phosphatase 2, regulatory   | 0.011  | 1.008 | 9.53E-01 | 9.53E+01 |  |
| 7979565 | NM_080666   | WDR89     | WD repeat domain 89                 | 0.032  | 1.023 | 8.78E-01 | 8.78E+01 |  |
| 7979572 | ---         | ---       | ---                                 | 0.098  | 1.070 | 6.15E-01 | 6.15E+01 |  |
| 7979574 | NM_030791   | SGPP1     | sphingosine-1-phosphate phosph      | 0.048  | 1.034 | 6.07E-01 | 6.07E+01 |  |
| 7979611 | NM_006977   | ZBTB25    | zinc finger and BTB domain contai   | -0.086 | 0.942 | 5.83E-01 | 5.83E+01 |  |
| 7979658 | NM_002083   | GPX2      | glutathione peroxidase 2 (gastroin  | -0.004 | 0.998 | 9.88E-01 | 9.88E+01 |  |
| 7979663 | NM_198686   | RAB15     | RAB15, member RAS oncogene fa       | -0.036 | 0.975 | 8.05E-01 | 8.05E+01 |  |
| 7979671 | NM_145113   | MAX       | MYC associated factor X             | 0.102  | 1.073 | 1.55E-01 | 1.55E+01 |  |
| 7979694 | ---         | ---       | ---                                 | 0.086  | 1.062 | 2.29E-01 | 2.29E+01 |  |
| 7979698 | NM_015994   | ATP6V1D   | ATPase, H+ transporting, lysosoma   | 0.109  | 1.079 | 7.09E-01 | 7.09E+01 |  |
| 7979725 | NM_004569   | PIGH      | phosphatidylinositol glycan ancho   | -0.071 | 0.952 | 7.89E-01 | 7.89E+01 |  |
| 7979732 | NM_006370   | VTI1B     | vesicle transport through interact  | 0.052  | 1.037 | 6.51E-01 | 6.51E+01 |  |
| 7979741 | ---         | ---       | ---                                 | -0.137 | 0.910 | 2.35E-01 | 2.35E+01 |  |
| 7979743 | NM_016026   | RDH11     | retinol dehydrogenase 11 (all-tran  | -0.009 | 0.994 | 9.74E-01 | 9.74E+01 |  |
| 7979757 | NM_015346   | ZFYVE26   | zinc finger, FYVE domain containir  | 0.022  | 1.015 | 9.01E-01 | 9.01E+01 |  |
| 7979802 | ---         | ---       | ---                                 | 0.020  | 1.014 | 9.73E-01 | 9.73E+01 |  |
| 7979804 | ---         | ---       | ---                                 | 0.165  | 1.121 | 5.77E-01 | 5.77E+01 |  |
| 7979808 | ---         | ---       | ---                                 | 0.042  | 1.030 | 8.10E-01 | 8.10E+01 |  |
| 7979813 | NM_004926   | ZFP36L1   | zinc finger protein 36, C3H type-li | 0.107  | 1.077 | 1.13E-01 | 1.13E+01 |  |
| 7979820 | NM_207442   | C14orf181 | chromosome 14 open reading fram     | 0.054  | 1.038 | 5.91E-01 | 5.91E+01 |  |
| 7979824 | NM_00113000 | ACTN1     | actinin, alpha 1                    | -0.132 | 0.912 | 5.11E-01 | 5.11E+01 |  |
| 7979849 | NM_003861   | DCAF5     | DOB1 and CUL4 associated factor     | -0.008 | 0.995 | 9.74E-01 | 9.74E+01 |  |
| 7979862 | ---         | ---       | ---                                 | -0.026 | 0.982 | 9.09E-01 | 9.09E+01 |  |
| 7979864 | NM_004450   | ERH       | enhancer of rudimentary homolog     | 0.037  | 1.026 | 8.07E-01 | 8.07E+01 |  |

|         |              |              |                                       |        |       |          |          |  |  |
|---------|--------------|--------------|---------------------------------------|--------|-------|----------|----------|--|--|
| 7979876 | ENST00000413 | LOC100130174 | hypothetical LOC100130174             | 0.004  | 1.002 | 9.80E-01 | 9.80E+01 |  |  |
| 7979878 | NM_003049    | SLC10A1      | solute carrier family 10 (sodium/b    | -0.007 | 0.995 | 9.88E-01 | 9.88E+01 |  |  |
| 7979886 | ---          | ---          | ---                                   | -0.034 | 0.976 | 9.00E-01 | 9.00E+01 |  |  |
| 7979906 | NM_016468    | COX16        | COX16 cytochrome c oxidase asse       | 0.111  | 1.080 | 2.94E-01 | 2.94E+01 |  |  |
| 7979916 | NM_018373    | SYNJ2BP      | synaptotagmin 2 binding protein       | 0.046  | 1.032 | 8.87E-01 | 8.87E+01 |  |  |
| 7979927 | NM_003814    | ADAM20       | ADAM metalloproteinase domain 2       | -0.015 | 0.990 | 9.53E-01 | 9.53E+01 |  |  |
| 7979931 | NM_005466    | MED6         | mediator complex subunit 6            | -0.022 | 0.985 | 9.00E-01 | 9.00E+01 |  |  |
| 7979943 | NM_033141    | MAP3K9       | mitogen-activated protein kinase 9    | -0.012 | 0.992 | 9.50E-01 | 9.50E+01 |  |  |
| 7979963 | NM_012074    | DPF3         | D4, zinc and double PHD fingers, fi   | -0.016 | 0.989 | 9.16E-01 | 9.16E+01 |  |  |
| 7979980 | ---          | ---          | ---                                   | -0.006 | 0.996 | 9.81E-01 | 9.81E+01 |  |  |
| 7979982 | ---          | ---          | ---                                   | -0.090 | 0.940 | 4.62E-01 | 4.62E+01 |  |  |
| 7979984 | NM_021260    | ZFYVE1       | zinc finger, FYVE domain containin    | 0.006  | 1.004 | 9.77E-01 | 9.77E+01 |  |  |
| 7980001 | ---          | ---          | ---                                   | 0.030  | 1.021 | 9.31E-01 | 9.31E+01 |  |  |
| 7980003 | ---          | ---          | ---                                   | -0.301 | 0.812 | 6.30E-02 | 6.30E+00 |  |  |
| 7980005 | NM_00100574  | NUMB         | numb homolog (Drosophila)             | 0.000  | 1.000 | 1.00E+00 | 1.00E+02 |  |  |
| 7980024 | NM_203309    | HEATR4       | HEAT repeat containing 4              | -0.009 | 0.994 | 9.75E-01 | 9.75E+01 |  |  |
| 7980044 | NM_006029    | PNMA1        | paraneoplastic antigen MA1            | -0.232 | 0.851 | 6.13E-03 | 6.13E-01 |  |  |
| 7980051 | NM_194278    | C14orf43     | chromosome 14 open reading fram       | -0.037 | 0.975 | 7.14E-01 | 7.14E+01 |  |  |
| 7980069 | NM_182480    | COQ6         | coenzyme Q6 homolog, monooxyg         | -0.041 | 0.972 | 7.16E-01 | 7.16E+01 |  |  |
| 7980080 | NM_001249    | ENTPD5       | ectonucleoside triphosphate diph      | 0.154  | 1.112 | 3.28E-01 | 3.28E+01 |  |  |
| 7980098 | NM_005589    | ALDH6A1      | aldehyde dehydrogenase 6 family,      | 0.066  | 1.047 | 6.34E-01 | 6.34E+01 |  |  |
| 7980115 | NM_005050    | ABCD4        | ATP-binding cassette, sub-family D    | -0.006 | 0.996 | 9.73E-01 | 9.73E+01 |  |  |
| 7980140 | ---          | ---          | ---                                   | 0.018  | 1.012 | 9.50E-01 | 9.50E+01 |  |  |
| 7980152 | NM_000428    | LTBP2        | latent transforming growth factor     | -0.049 | 0.967 | 6.79E-01 | 6.79E+01 |  |  |
| 7980189 | NM_00103947  | KIAA0317     | KIAA0317                              | 0.000  | 1.000 | 1.00E+00 | 1.00E+02 |  |  |
| 7980219 | NM_031464    | RPS6KL1      | ribosomal protein S6 kinase-like 1    | -0.057 | 0.961 | 5.60E-01 | 5.60E+01 |  |  |
| 7980233 | NM_002632    | PGF          | placental growth factor               | -0.019 | 0.987 | 9.19E-01 | 9.19E+01 |  |  |
| 7980246 | NM_00104010  | MLH3         | mutL homolog 3 (E. coli)              | 0.044  | 1.031 | 7.75E-01 | 7.75E+01 |  |  |
| 7980265 | NM_203488    | ACYP1        | acylphosphatase 1, erythrocyte (c     | 0.024  | 1.016 | 9.24E-01 | 9.24E+01 |  |  |
| 7980271 | NM_033116    | NEK9         | NIMA (never in mitosis gene a)- re    | 0.074  | 1.053 | 4.29E-01 | 4.29E+01 |  |  |
| 7980296 | NM_006827    | TMED10       | transmembrane emp24-like traffic      | 0.218  | 1.163 | 2.75E-02 | 2.75E+00 |  |  |
| 7980309 | NM_007176    | C14orf1      | chromosome 14 open reading fram       | -0.097 | 0.935 | 5.93E-01 | 5.93E+01 |  |  |
| 7980316 | NM_003239    | TGFB3        | transforming growth factor, beta 3    | -0.017 | 0.988 | 9.44E-01 | 9.44E+01 |  |  |
| 7980327 | NM_015305    | ANGEL1       | angel homolog 1 (Drosophila)          | 0.084  | 1.060 | 2.78E-01 | 2.78E+01 |  |  |
| 7980338 | NM_024496    | C14orf4      | chromosome 14 open reading fram       | 0.056  | 1.040 | 6.57E-01 | 6.57E+01 |  |  |
| 7980352 | NM_021257    | NGB          | neuroglobin                           | -0.033 | 0.977 | 7.97E-01 | 7.97E+01 |  |  |
| 7980358 | NM_013382    | POMT2        | protein-O-mannosyltransferase 2       | -0.064 | 0.957 | 5.40E-01 | 5.40E+01 |  |  |
| 7980381 | NM_213601    | TMED8        | transmembrane emp24 protein tra       | 0.144  | 1.105 | 1.55E-01 | 1.55E+01 |  |  |
| 7980390 | NM_00111347  | C14orf148    | chromosome 14 open reading fram       | 0.003  | 1.002 | 9.92E-01 | 9.92E+01 |  |  |
| 7980403 | BC015054     | C14orf133    | chromosome 14 open reading fram       | 0.056  | 1.040 | 8.10E-01 | 8.10E+01 |  |  |
| 7980425 | NM_199296    | ISM2         | isthmin 2 homolog (zebrafish)         | -0.038 | 0.974 | 7.77E-01 | 7.77E+01 |  |  |
| 7980438 | NM_004863    | SPTLC2       | serine palmitoyltransferase, long c   | 0.032  | 1.022 | 9.00E-01 | 9.00E+01 |  |  |
| 7980452 | ---          | ---          | ---                                   | -0.003 | 0.998 | 9.91E-01 | 9.91E+01 |  |  |
| 7980454 | NM_006020    | ALKBH1       | alkB, alkylation repair homolog 1 (   | 0.076  | 1.054 | 7.92E-01 | 7.92E+01 |  |  |
| 7980463 | NM_012245    | SNW1         | SNW domain containing 1               | -0.028 | 0.981 | 8.62E-01 | 8.62E+01 |  |  |
| 7980477 | ---          | ---          | ---                                   | 0.047  | 1.033 | 8.84E-01 | 8.84E+01 |  |  |
| 7980496 | NM_152446    | C14orf145    | chromosome 14 open reading fram       | -0.037 | 0.974 | 8.97E-01 | 8.97E+01 |  |  |
| 7980523 | NM_015859    | GTF2A1       | general transcription factor IIA, 1,  | 0.053  | 1.037 | 6.31E-01 | 6.31E+01 |  |  |
| 7980535 | NM_00103749  | DYNLL1       | dynein, light chain, LC8-type 1       | 0.053  | 1.037 | 8.10E-01 | 8.10E+01 |  |  |
| 7980547 | NM_005065    | SEL1L        | sel-1 suppressor of lin-12-like (C. e | 0.192  | 1.142 | 6.99E-02 | 6.99E+00 |  |  |
| 7980580 | NM_000153    | GALC         | galactosylceramidase                  | 0.222  | 1.166 | 3.17E-01 | 3.17E+01 |  |  |
| 7980680 | NM_00108547  | FOXN3        | forkhead box N3                       | 0.243  | 1.183 | 3.25E-04 | 3.25E-02 |  |  |
| 7980700 | ---          | ---          | ---                                   | 0.049  | 1.034 | 7.31E-01 | 7.31E+01 |  |  |
| 7980702 | NM_017970    | C14orf102    | chromosome 14 open reading fram       | -0.010 | 0.993 | 9.65E-01 | 9.65E+01 |  |  |
| 7980720 | NM_00101085  | TTC7B        | tetratricopeptide repeat domain 7     | 0.139  | 1.101 | 2.93E-01 | 2.93E+01 |  |  |
| 7980742 | ENST00000433 | LOC283588    | hypothetical LOC283588                | -0.226 | 0.855 | 3.95E-01 | 3.95E+01 |  |  |
| 7980744 | NM_004755    | RPS6KA5      | ribosomal protein S6 kinase, 90kD     | 0.043  | 1.030 | 8.47E-01 | 8.47E+01 |  |  |
| 7980765 | NM_003485    | GPR68        | G protein-coupled receptor 68         | -0.213 | 0.863 | 6.89E-02 | 6.89E+00 |  |  |
| 7980773 | NM_00108041  | CCDC88C      | coiled-coil domain containing 88C     | -0.062 | 0.958 | 7.14E-01 | 7.14E+01 |  |  |
| 7980828 | NM_00108041  | CCDC88C      | coiled-coil domain containing 88C     | -0.037 | 0.975 | 9.36E-01 | 9.36E+01 |  |  |
| 7980833 | NM_032560    | SMEK1        | SMEK homolog 1, suppressor of m       | -0.035 | 0.976 | 7.50E-01 | 7.50E+01 |  |  |
| 7980859 | NM_00108011  | PP89G1       | hypothetical protein LOC650662        | -0.020 | 0.986 | 8.96E-01 | 8.96E+01 |  |  |
| 7980889 | ---          | ---          | ---                                   | -0.028 | 0.980 | 8.50E-01 | 8.50E+01 |  |  |
| 7980891 | NM_00112859  | TC2N         | tandem C2 domains, nuclear            | -0.004 | 0.997 | 9.89E-01 | 9.89E+01 |  |  |
| 7980906 | ---          | ---          | ---                                   | -0.041 | 0.972 | 9.20E-01 | 9.20E+01 |  |  |
| 7980908 | NM_006329    | FBLN5        | fibulin 5                             | 0.080  | 1.057 | 4.31E-01 | 4.31E+01 |  |  |
| 7980923 | NM_004239    | TRIP11       | thyroid hormone receptor interac      | -0.060 | 0.959 | 6.93E-01 | 6.93E+01 |  |  |
| 7980940 | NM_004993    | ATXN3        | ataxin 3                              | 0.020  | 1.014 | 9.09E-01 | 9.09E+01 |  |  |
| 7980955 | NM_004545    | NDUFB1       | NADH dehydrogenase (ubiquinone        | 0.008  | 1.006 | 9.68E-01 | 9.68E+01 |  |  |
| 7980970 | NM_014216    | ITPK1        | inositol 1,3,4-trisphosphate 5/6 kin  | -0.037 | 0.975 | 8.27E-01 | 8.27E+01 |  |  |
| 7980983 | NM_022151    | MOAP1        | modulator of apoptosis 1              | -0.007 | 0.995 | 9.75E-01 | 9.75E+01 |  |  |
| 7980990 | NM_032490    | C14orf142    | chromosome 14 open reading fram       | 0.016  | 1.011 | 9.46E-01 | 9.46E+01 |  |  |
| 7980998 | NM_00100286  | BTBD7        | BTB (POZ) domain containing 7         | 0.068  | 1.048 | 6.85E-01 | 6.85E+01 |  |  |
| 7981013 | NM_178013    | PRIMA1       | proline rich membrane anchor 1        | 0.025  | 1.017 | 8.69E-01 | 8.69E+01 |  |  |
| 7981032 | NM_020414    | DDX24        | DEAD (Asp-Glu-Ala-Asp) box polyp      | -0.070 | 0.953 | 4.93E-01 | 4.93E+01 |  |  |
| 7981046 | NM_032036    | IFI27L2      | interferon, alpha-inducible protei    | 0.090  | 1.065 | 4.49E-01 | 4.49E+01 |  |  |
| 7981051 | NM_016186    | SERPINA10    | serpin peptidase inhibitor, clade A   | -0.013 | 0.991 | 9.49E-01 | 9.49E+01 |  |  |



|         |              |              |                                     |        |       |          |          |  |  |
|---------|--------------|--------------|-------------------------------------|--------|-------|----------|----------|--|--|
| 7981068 | NM_00100223  | SERPINA1     | serpin peptidase inhibitor, clade A | -0.450 | 0.732 | 3.45E-01 | 3.45E+01 |  |  |
| 7981078 | NM_00108045  | SERPINA11    | serpin peptidase inhibitor, clade A | 0.022  | 1.015 | 8.71E-01 | 8.71E+01 |  |  |
| 7981106 | NM_173849    | GSC          | goosecoid homeobox                  | 0.048  | 1.034 | 7.17E-01 | 7.17E+01 |  |  |
| 7981111 | NM_177438    | DICER1       | dicer 1, ribonuclease type III      | 0.236  | 1.178 | 1.85E-02 | 1.85E+00 |  |  |
| 7981142 | NM_024734    | CLMN         | calmin (calponin-like, transmembr   | 0.319  | 1.247 | 2.39E-01 | 2.39E+01 |  |  |
| 7981157 | NR_026779    | C14orf139    | chromosome 14 open reading fram     | 0.101  | 1.073 | 2.00E-01 | 2.00E+01 |  |  |
| 7981161 | NM_152592    | C14orf49     | chromosome 14 open reading fram     | 0.005  | 1.003 | 9.75E-01 | 9.75E+01 |  |  |
| 7981181 | NR_003002    | SCARNA13     | small Cajal body-specific RNA 13    | 0.058  | 1.041 | 9.09E-01 | 9.09E+01 |  |  |
| 7981192 | NM_018036    | ATG2B        | ATG2 autophagy related 2 homolo     | -0.040 | 0.973 | 8.50E-01 | 8.50E+01 |  |  |
| 7981215 | ---          | ---          | ---                                 | 0.139  | 1.101 | 5.51E-01 | 5.51E+01 |  |  |
| 7981217 | NM_018036    | ATG2B        | ATG2 autophagy related 2 homolo     | -0.018 | 0.988 | 9.50E-01 | 9.50E+01 |  |  |
| 7981242 | NM_138576    | BCL11B       | B-cell CLL/lymphoma 11B (zinc fin   | -0.032 | 0.978 | 8.16E-01 | 8.16E+01 |  |  |
| 7981249 | NM_032233    | SETD3        | SET domain containing 3             | 0.094  | 1.067 | 4.04E-01 | 4.04E+01 |  |  |
| 7981266 | NM_00114499  | CCDC85C      | coiled-coil domain containing 85C   | -0.033 | 0.977 | 7.45E-01 | 7.45E+01 |  |  |
| 7981273 | NM_00114499  | CCDC85C      | coiled-coil domain containing 85C   | -0.036 | 0.975 | 8.66E-01 | 8.66E+01 |  |  |
| 7981278 | NM_206918    | DEGS2        | degenerative spermatocyte homo      | -0.062 | 0.958 | 4.94E-01 | 4.94E+01 |  |  |
| 7981283 | NM_00103935  | SLC25A29     | solute carrier family 25, member 2  | 0.014  | 1.010 | 9.51E-01 | 9.51E+01 |  |  |
| 7981290 | NM_004184    | WARS         | tryptophanyl-tRNA synthetase        | 0.462  | 1.377 | 7.17E-02 | 7.17E+00 |  |  |
| 7981317 | ---          | ---          | ---                                 | -0.010 | 0.993 | 9.56E-01 | 9.56E+01 |  |  |
| 7981320 | ---          | ---          | ---                                 | 0.031  | 1.022 | 8.73E-01 | 8.73E+01 |  |  |
| 7981326 | AF305836     | DIO3OS       | DIO3 opposite strand (non-protein   | -0.009 | 0.994 | 9.55E-01 | 9.55E+01 |  |  |
| 7981333 | ---          | ---          | ---                                 | -0.529 | 0.693 | 1.40E-01 | 1.40E+01 |  |  |
| 7981335 | NM_00101796  | HSP90AA1     | heat shock protein 90kDa alpha (c   | -0.028 | 0.981 | 8.13E-01 | 8.13E+01 |  |  |
| 7981364 | NM_032630    | CINP         | cyclin-dependent kinase 2 interact  | 0.069  | 1.049 | 6.91E-01 | 6.91E+01 |  |  |
| 7981377 | NM_152326    | ANKRD9       | ankyrin repeat domain 9             | 0.015  | 1.011 | 9.37E-01 | 9.37E+01 |  |  |
| 7981383 | ---          | ---          | ---                                 | -0.009 | 0.994 | 9.73E-01 | 9.73E+01 |  |  |
| 7981385 | ---          | ---          | ---                                 | 0.056  | 1.039 | 8.41E-01 | 8.41E+01 |  |  |
| 7981387 | NM_006035    | CDC42BPB     | CDC42 binding protein kinase beta   | -0.032 | 0.978 | 8.79E-01 | 8.79E+01 |  |  |
| 7981425 | ---          | ---          | ---                                 | -0.006 | 0.996 | 9.74E-01 | 9.74E+01 |  |  |
| 7981427 | NM_001823    | CKB          | creatine kinase, brain              | -0.070 | 0.953 | 6.66E-01 | 6.66E+01 |  |  |
| 7981439 | NM_00101504  | BAG5         | BCL2-associated athanogene 5        | -0.044 | 0.970 | 7.52E-01 | 7.52E+01 |  |  |
| 7981447 | NM_00110011  | XRCC3        | X-ray repair complementing defec    | -0.045 | 0.969 | 7.69E-01 | 7.69E+01 |  |  |
| 7981460 | NM_015316    | PPP1R13B     | protein phosphatase 1, regulatory   | -0.246 | 0.843 | 6.11E-04 | 6.11E-02 |  |  |
| 7981481 | NM_004894    | C14orf2      | chromosome 14 open reading fram     | 0.017  | 1.012 | 9.28E-01 | 9.28E+01 |  |  |
| 7981488 | AF462446     | LOC100288144 | hypothetical protein LOC1002881     | -0.069 | 0.954 | 4.23E-01 | 4.23E+01 |  |  |
| 7981490 | NM_207379    | TMEM179      | transmembrane protein 179           | 0.036  | 1.025 | 7.60E-01 | 7.60E+01 |  |  |
| 7981494 | NM_00101443  | AKT1         | v-akt murine thymoma viral oncog    | -0.049 | 0.966 | 6.14E-01 | 6.14E+01 |  |  |
| 7981512 | ---          | ---          | ---                                 | -0.050 | 0.966 | 7.62E-01 | 7.62E+01 |  |  |
| 7981523 | ---          | ---          | ---                                 | 0.044  | 1.031 | 8.14E-01 | 8.14E+01 |  |  |
| 7981525 | NM_017955    | CDC44        | cell division cycle associated 4    | -0.133 | 0.912 | 1.08E-01 | 1.08E+01 |  |  |
| 7981530 | NM_013345    | GPR132       | G protein-coupled receptor 132      | -0.137 | 0.910 | 2.43E-01 | 2.43E+01 |  |  |
| 7981538 | NM_002226    | JAG2         | jagged 2                            | 0.003  | 1.002 | 9.84E-01 | 9.84E+01 |  |  |
| 7981566 | NM_177533    | NUDT14       | nudix (nucleoside diphosphate link  | 0.029  | 1.020 | 8.16E-01 | 8.16E+01 |  |  |
| 7981573 | NM_145685    | BRF1         | BRF1 homolog, subunit of RNA pol    | -0.003 | 0.998 | 9.84E-01 | 9.84E+01 |  |  |
| 7981601 | AK301335     | IGHV4-31     | immunoglobulin heavy variable 4-    | 0.294  | 1.226 | 7.12E-04 | 7.12E-02 |  |  |
| 7981708 | ENST00000390 | IGHE         | immunoglobulin heavy constant e     | -0.042 | 0.971 | 8.66E-01 | 8.66E+01 |  |  |
| 7981714 | ---          | ---          | ---                                 | -0.014 | 0.990 | 9.61E-01 | 9.61E+01 |  |  |
| 7981742 | ENST00000390 | LOC90925     | hypothetical protein LOC90925       | 0.020  | 1.014 | 9.37E-01 | 9.37E+01 |  |  |
| 7981750 | AK127783     | LOC400968    | hypothetical LOC400968              | 0.015  | 1.010 | 9.50E-01 | 9.50E+01 |  |  |
| 7981752 | NR_027407    | GOLGA8D      | golgi autoantigen, golgin subfamili | -0.046 | 0.969 | 4.73E-01 | 4.73E+01 |  |  |
| 7981771 | ---          | ---          | ---                                 | -0.018 | 0.988 | 9.01E-01 | 9.01E+01 |  |  |
| 7981773 | ---          | ---          | ---                                 | 0.137  | 1.099 | 6.09E-01 | 6.09E+01 |  |  |
| 7981775 | ENST00000435 | DKFZP547L112 | hypothetical protein DKFZP547L11    | -0.028 | 0.981 | 8.88E-01 | 8.88E+01 |  |  |
| 7981777 | AK127783     | LOC400968    | hypothetical LOC400968              | -0.078 | 0.947 | 5.60E-01 | 5.60E+01 |  |  |
| 7981787 | NM_00100141  | LOC283767    | golgi autoantigen, golgin subfamili | 0.020  | 1.014 | 9.13E-01 | 9.13E+01 |  |  |
| 7981824 | NM_014608    | CYFIP1       | cytoplasmic FMR1 interacting prot   | 0.427  | 1.345 | 8.71E-02 | 8.71E+00 |  |  |
| 7981859 | NR_024074    | GOLGA9P      | golgi autoantigen, golgin subfamili | -0.017 | 0.988 | 9.16E-01 | 9.16E+01 |  |  |
| 7981872 | ---          | ---          | ---                                 | -0.010 | 0.993 | 9.61E-01 | 9.61E+01 |  |  |
| 7981874 | NM_00101242  | GOLGA8E      | golgi autoantigen, golgin subfamili | -0.027 | 0.981 | 7.15E-01 | 7.15E+01 |  |  |
| 7981893 | ---          | ---          | ---                                 | -0.018 | 0.988 | 9.01E-01 | 9.01E+01 |  |  |
| 7981895 | NM_00101242  | GOLGA8E      | golgi autoantigen, golgin subfamili | -0.026 | 0.982 | 8.27E-01 | 8.27E+01 |  |  |
| 7981909 | ---          | ---          | ---                                 | -0.007 | 0.995 | 9.77E-01 | 9.77E+01 |  |  |
| 7981911 | NM_005664    | MKRN3        | makorin ring finger protein 3       | -0.009 | 0.994 | 9.77E-01 | 9.77E+01 |  |  |
| 7981917 | NM_018958    | C15orf2      | chromosome 15 open reading fram     | -0.067 | 0.955 | 4.45E-01 | 4.45E+01 |  |  |
| 7981919 | NM_022807    | SNRPN        | small nuclear ribonucleoprotein p   | -0.083 | 0.944 | 5.53E-01 | 5.53E+01 |  |  |
| 7981943 | NR_022008    | PAR5         | Prader-Willi/Angelman syndrome-     | -0.082 | 0.945 | 8.64E-01 | 8.64E+01 |  |  |
| 7981949 | NR_003316    | SNORD116-1   | small nucleolar RNA, C/D box 116-   | 0.407  | 1.326 | 2.31E-01 | 2.31E+01 |  |  |
| 7981951 | NR_003317    | SNORD116-2   | small nucleolar RNA, C/D box 116-   | 0.097  | 1.070 | 7.24E-01 | 7.24E+01 |  |  |
| 7981953 | NR_003318    | SNORD116-3   | small nucleolar RNA, C/D box 116-   | 0.316  | 1.245 | 3.18E-01 | 3.18E+01 |  |  |
| 7981955 | NR_003319    | SNORD116-4   | small nucleolar RNA, C/D box 116-   | 0.205  | 1.153 | 5.42E-01 | 5.42E+01 |  |  |
| 7981958 | NR_003320    | SNORD116-5   | small nucleolar RNA, C/D box 116-   | 0.307  | 1.237 | 3.64E-01 | 3.64E+01 |  |  |
| 7981960 | NR_003321    | SNORD116-6   | small nucleolar RNA, C/D box 116-   | 0.092  | 1.066 | 7.87E-01 | 7.87E+01 |  |  |
| 7981962 | NR_003320    | SNORD116-5   | small nucleolar RNA, C/D box 116-   | 0.307  | 1.237 | 3.64E-01 | 3.64E+01 |  |  |
| 7981964 | NR_003323    | SNORD116-8   | small nucleolar RNA, C/D box 116-   | 0.347  | 1.272 | 2.84E-01 | 2.84E+01 |  |  |
| 7981966 | NR_003318    | SNORD116-3   | small nucleolar RNA, C/D box 116-   | 0.316  | 1.245 | 3.18E-01 | 3.18E+01 |  |  |
| 7981976 | NR_003329    | SNORD116-14  | small nucleolar RNA, C/D box 116-   | 0.229  | 1.172 | 6.08E-01 | 6.08E+01 |  |  |
| 7981978 | NR_003330    | SNORD116-15  | small nucleolar RNA, C/D box 116-   | 0.069  | 1.049 | 8.38E-01 | 8.38E+01 |  |  |

|         |              |               |                                      |        |       |          |          |  |  |
|---------|--------------|---------------|--------------------------------------|--------|-------|----------|----------|--|--|
| 7981982 | NR_003332    | SNORD116-17   | small nucleolar RNA, C/D box 116-    | 0.011  | 1.008 | 9.86E-01 | 9.86E+01 |  |  |
| 7981986 | NR_003332    | SNORD116-17   | small nucleolar RNA, C/D box 116-    | 0.011  | 1.008 | 9.86E-01 | 9.86E+01 |  |  |
| 7981988 | NR_003334    | SNORD116-20   | small nucleolar RNA, C/D box 116-    | 0.022  | 1.016 | 9.74E-01 | 9.74E+01 |  |  |
| 7981990 | NR_003335    | SNORD116-21   | small nucleolar RNA, C/D box 116-    | -0.100 | 0.933 | 8.77E-01 | 8.77E+01 |  |  |
| 7982100 | ---          | ---           | ---                                  | 0.399  | 1.319 | 2.19E-01 | 2.19E+01 |  |  |
| 7982129 | ENST00000358 | RPL41         | ribosomal protein L41                | -0.010 | 0.993 | 9.35E-01 | 9.35E+01 |  |  |
| 7982131 | NM_00101242  | GOLGA8G       | golgi autoantigen, golgin subfamily  | -0.049 | 0.967 | 4.29E-01 | 4.29E+01 |  |  |
| 7982152 | ---          | ---           | ---                                  | 0.041  | 1.029 | 8.06E-01 | 8.06E+01 |  |  |
| 7982154 | NR_002824    | HERC2P2       | hect domain and RLD 2 pseudogen      | -0.009 | 0.994 | 9.71E-01 | 9.71E+01 |  |  |
| 7982187 | NM_005503    | APBA2         | amyloid beta (A4) precursor prote    | 0.047  | 1.033 | 8.58E-01 | 8.58E+01 |  |  |
| 7982204 | NM_005517    | HMG2          | high-mobility group nucleosomal b    | 0.069  | 1.049 | 6.25E-01 | 6.25E+01 |  |  |
| 7982206 | NR_024074    | GOLGA9P       | golgi autoantigen, golgin subfamily  | 0.017  | 1.012 | 9.07E-01 | 9.07E+01 |  |  |
| 7982228 | ---          | ---           | ---                                  | -0.041 | 0.972 | 8.09E-01 | 8.09E+01 |  |  |
| 7982230 | NR_024074    | GOLGA9P       | golgi autoantigen, golgin subfamily  | 0.019  | 1.013 | 9.25E-01 | 9.25E+01 |  |  |
| 7982250 | ---          | ---           | ---                                  | -0.041 | 0.972 | 8.09E-01 | 8.09E+01 |  |  |
| 7982254 | ---          | ---           | ---                                  | 0.031  | 1.021 | 8.35E-01 | 8.35E+01 |  |  |
| 7982256 | NR_024074    | GOLGA9P       | golgi autoantigen, golgin subfamily  | -0.038 | 0.974 | 8.66E-01 | 8.66E+01 |  |  |
| 7982267 | ---          | ---           | ---                                  | -0.042 | 0.971 | 8.07E-01 | 8.07E+01 |  |  |
| 7982271 | NR_024074    | GOLGA9P       | golgi autoantigen, golgin subfamily  | 0.062  | 1.044 | 7.44E-01 | 7.44E+01 |  |  |
| 7982282 | ---          | ---           | ---                                  | -0.033 | 0.978 | 8.49E-01 | 8.49E+01 |  |  |
| 7982284 | ENST00000314 | LOC728047     | similar to Golgin subfamily A mem    | -0.107 | 0.928 | 3.29E-01 | 3.29E+01 |  |  |
| 7982287 | NM_00103984  | ARHGAP11B     | Rho GTPase activating protein 11B    | 0.019  | 1.013 | 9.74E-01 | 9.74E+01 |  |  |
| 7982290 | ---          | ---           | ---                                  | 0.060  | 1.042 | 9.23E-01 | 9.23E+01 |  |  |
| 7982307 | ---          | ---           | ---                                  | -0.033 | 0.978 | 8.49E-01 | 8.49E+01 |  |  |
| 7982309 | NM_014967    | MTMR15        | myotubularin related protein 15      | 0.120  | 1.086 | 5.57E-01 | 5.57E+01 |  |  |
| 7982326 | NM_015995    | KLF13         | Kruppel-like factor 13               | -0.051 | 0.965 | 6.35E-01 | 6.35E+01 |  |  |
| 7982333 | AK127052     | LOC283711     | hypothetical protein LOC283711       | -0.024 | 0.983 | 8.98E-01 | 8.98E+01 |  |  |
| 7982339 | AK097050     | LOC100130857  | hypothetical protein LOC10013085     | -0.074 | 0.950 | 6.42E-01 | 6.42E+01 |  |  |
| 7982341 | NM_000746    | CHRNA7        | cholinergic receptor, nicotinic, alp | 0.014  | 1.009 | 9.64E-01 | 9.64E+01 |  |  |
| 7982348 | ENST00000416 | LOC100129979  | similar to FLJ00287 protein          | -0.044 | 0.970 | 6.94E-01 | 6.94E+01 |  |  |
| 7982350 | NR_024074    | GOLGA9P       | golgi autoantigen, golgin subfamily  | -0.065 | 0.956 | 7.87E-01 | 7.87E+01 |  |  |
| 7982356 | ---          | ---           | ---                                  | -0.041 | 0.972 | 8.25E-01 | 8.25E+01 |  |  |
| 7982377 | NM_013372    | GREM1         | gremlin 1, cysteine knot superfamily | 0.081  | 1.058 | 7.15E-01 | 7.15E+01 |  |  |
| 7982388 | ---          | ---           | ---                                  | 0.025  | 1.018 | 9.80E-01 | 9.80E+01 |  |  |
| 7982497 | NM_012125    | CHRM5         | cholinergic receptor, muscarinic 5   | 0.041  | 1.029 | 8.05E-01 | 8.05E+01 |  |  |
| 7982504 | NM_152595    | PGBD4         | piggyBac transposable element de     | 0.065  | 1.046 | 6.71E-01 | 6.71E+01 |  |  |
| 7982507 | NM_016454    | TMEM85        | transmembrane protein 85             | -0.146 | 0.904 | 5.53E-02 | 5.53E+00 |  |  |
| 7982514 | ---          | ---           | ---                                  | 0.203  | 1.151 | 4.25E-01 | 4.25E+01 |  |  |
| 7982527 | NM_014106    | ZNF770        | zinc finger protein 770              | 0.001  | 1.001 | 9.98E-01 | 9.98E+01 |  |  |
| 7982529 | ENST00000454 | LOC441722     | U2 small nuclear RNA auxiliary fac   | -0.061 | 0.958 | 6.93E-01 | 6.93E+01 |  |  |
| 7982531 | NM_006305 // | // ANP32A //  | acidic (leucine-rich) nuclear phosph | -0.006 | 0.996 | 9.68E-01 | 9.68E+01 |  |  |
| 7982535 | NM_032499    | C15orf41      | chromosome 15 open reading frame     | -0.108 | 0.928 | 4.01E-01 | 4.01E+01 |  |  |
| 7982587 | NM_207444    | C15orf53      | chromosome 15 open reading frame     | -0.061 | 0.959 | 6.44E-01 | 6.44E+01 |  |  |
| 7982597 | NM_003246    | THBS1         | thrombospondin 1                     | -0.182 | 0.882 | 9.04E-01 | 9.04E+01 |  |  |
| 7982620 | NM_00101370  | EIF2AK4       | eukaryotic translation initiation fa | 0.011  | 1.008 | 9.64E-01 | 9.64E+01 |  |  |
| 7982688 | NM_020168    | PAK6          | p21 protein (Cdc42/Rac)-activated    | -0.040 | 0.973 | 7.51E-01 | 7.51E+01 |  |  |
| 7982703 | NM_033510    | DISP2         | dispatched homolog 2 (Drosophila     | 0.042  | 1.030 | 6.25E-01 | 6.25E+01 |  |  |
| 7982712 | NM_033286    | C15orf23      | chromosome 15 open reading frame     | 0.088  | 1.063 | 6.54E-01 | 6.54E+01 |  |  |
| 7982723 | NM_002225    | IVD           | isovaleryl Coenzyme A dehydrogen     | 0.027  | 1.019 | 8.78E-01 | 8.78E+01 |  |  |
| 7982738 | NM_014952    | BAHD1         | bromo adjacent homology domain       | -0.083 | 0.944 | 3.91E-01 | 3.91E+01 |  |  |
| 7982745 | NM_130468    | CHST14        | carbohydrate (N-acetyl)galactosam    | -0.022 | 0.985 | 9.08E-01 | 9.08E+01 |  |  |
| 7982753 | NM_152260    | RPUSD2        | RNA pseudouridylation synthase do    | -0.001 | 0.999 | 9.95E-01 | 9.95E+01 |  |  |
| 7982805 | NM_005258    | GCHFR         | GTP cyclohydrolase I feedback reg    | -0.012 | 0.992 | 9.50E-01 | 9.50E+01 |  |  |
| 7982810 | NM_00113044  | C15orf62      | chromosome 15 open reading frame     | -0.012 | 0.992 | 9.49E-01 | 9.49E+01 |  |  |
| 7982812 | NM_00107726  | ZFYVE19       | zinc finger, FYVE domain containin   | -0.029 | 0.980 | 8.07E-01 | 8.07E+01 |  |  |
| 7982829 | NM_181642    | SPINT1        | serine peptidase inhibitor, Kunitz t | -0.060 | 0.960 | 6.18E-01 | 6.18E+01 |  |  |
| 7982845 | NM_020857    | VPS18         | vacuolar protein sorting 18 homolo   | 0.052  | 1.037 | 7.56E-01 | 7.56E+01 |  |  |
| 7982868 | NM_024111    | CHAC1         | ChaC, cation transport regulator h   | -0.040 | 0.973 | 7.68E-01 | 7.68E+01 |  |  |
| 7982878 | NM_007236    | CHP           | calcium binding protein P22          | 0.054  | 1.038 | 8.05E-01 | 8.05E+01 |  |  |
| 7982904 | NM_015138    | RTF1          | Rtf1, Paf1/RNA polymerase II com     | -0.013 | 0.991 | 9.47E-01 | 9.47E+01 |  |  |
| 7982927 | NM_002220    | ITPKA         | inositol 1,4,5-trisphosphate 3-kin   | -0.068 | 0.954 | 4.68E-01 | 4.68E+01 |  |  |
| 7982935 | ---          | ---           | ---                                  | 0.105  | 1.075 | 5.41E-01 | 5.41E+01 |  |  |
| 7982957 | NM_00108054  | MGA           | MAX gene associated                  | 0.012  | 1.009 | 9.53E-01 | 9.53E+01 |  |  |
| 7982985 | NM_014994    | MAPKBP1       | mitogen-activated protein kinase e   | -0.020 | 0.986 | 9.04E-01 | 9.04E+01 |  |  |
| 7983021 | NR_015346    | IMJD7-PLA2G4B | IMJD7-PLA2G4B readthrough tran       | -0.035 | 0.976 | 7.99E-01 | 7.99E+01 |  |  |
| 7983051 | NM_016642    | SPTBN5        | spectrin, beta, non-erythrocytic 5   | -0.140 | 0.908 | 7.38E-01 | 7.38E+01 |  |  |
| 7983054 | NR_027911    | CAPN3         | calpain 3, (p94)                     | 0.178  | 1.131 | 2.95E-02 | 2.95E+00 |  |  |
| 7983111 | NM_003825    | SNAP23        | synaptosomal-associated protein,     | 0.149  | 1.109 | 1.18E-01 | 1.18E+01 |  |  |
| 7983123 | NM_018097    | HAUS2         | HAUS augmin-like complex, subun      | 0.044  | 1.031 | 8.87E-01 | 8.87E+01 |  |  |
| 7983132 | AK122666     | LOC645106     | similar to kinesin-like motor prote  | -0.019 | 0.987 | 9.53E-01 | 9.53E+01 |  |  |
| 7983145 | AK297603     | STARD9        | STAR-related lipid transfer (START   | 0.004  | 1.003 | 9.86E-01 | 9.86E+01 |  |  |
| 7983157 | NM_024956    | TMEM62        | transmembrane protein 62             | 0.184  | 1.136 | 1.85E-01 | 1.85E+01 |  |  |
| 7983173 | NM_012142    | CCNDBP1       | cyclin D-type binding-protein 1      | -0.025 | 0.983 | 8.56E-01 | 8.56E+01 |  |  |
| 7983206 | NM_014444    | TUBGCP4       | tubulin, gamma complex associate     | 0.066  | 1.047 | 7.01E-01 | 7.01E+01 |  |  |
| 7983252 | ---          | ---           | ---                                  | 0.041  | 1.029 | 7.01E-01 | 7.01E+01 |  |  |
| 7983274 | NM_005313    | PDIA3         | protein disulfide isomerase family   | 0.244  | 1.185 | 2.37E-02 | 2.37E+00 |  |  |
| 7983290 | NM_00101810  | SERF2         | small EDRK-rich factor 2             | 0.092  | 1.066 | 3.29E-01 | 3.29E+01 |  |  |

|         |             |             |                                                            |        |       |          |          |  |  |
|---------|-------------|-------------|------------------------------------------------------------|--------|-------|----------|----------|--|--|
| 7983298 | NM_016400   | C15orf63    | chromosome 15 open reading frame 63                        | -0.013 | 0.991 | 9.44E-01 | 9.44E+01 |  |  |
| 7983306 | NM_024908   | WDR76       | WD repeat domain 76                                        | 0.014  | 1.010 | 9.68E-01 | 9.68E+01 |  |  |
| 7983321 | NM_138423   | CASC4       | cancer susceptibility candidate 4                          | -0.042 | 0.971 | 7.15E-01 | 7.15E+01 |  |  |
| 7983335 | NM_016396   | CTDSP2      | CTD (carboxy-terminal domain, RNA polymerase II subunit 2) | 0.011  | 1.007 | 9.60E-01 | 9.60E+01 |  |  |
| 7983350 | NM_003758   | EIF3J       | eukaryotic translation initiation factor 3, subunit J      | 0.015  | 1.010 | 9.28E-01 | 9.28E+01 |  |  |
| 7983360 | NM_004048   | B2M         | beta-2-microglobulin                                       | 0.031  | 1.022 | 6.79E-01 | 6.79E+01 |  |  |
| 7983365 | NM_182985   | TRIM69      | tripartite motif-containing 69                             | -0.029 | 0.980 | 8.73E-01 | 8.73E+01 |  |  |
| 7983393 | NM_003104   | SORD        | sorbitol dehydrogenase                                     | 0.067  | 1.047 | 6.98E-01 | 6.98E+01 |  |  |
| 7983469 | NR_027635   | SPATA5L1    | spermatogenesis associated 5-like 1                        | 0.060  | 1.042 | 7.85E-01 | 7.85E+01 |  |  |
| 7983502 | NM_012388   | PLDN        | pallidin homolog (mouse)                                   | 0.148  | 1.108 | 7.05E-02 | 7.05E+00 |  |  |
| 7983512 | NM_021199   | SQRDL       | sulfide quinone reductase-like (yeast)                     | -0.016 | 0.989 | 9.76E-01 | 9.76E+01 |  |  |
| 7983553 | NM_205850   | SLC24A5     | solute carrier family 24, member 5                         | -0.024 | 0.984 | 9.13E-01 | 9.13E+01 |  |  |
| 7983594 | NM_00102524 | DUT         | deoxyuridine triphosphatase                                | 0.044  | 1.031 | 7.91E-01 | 7.91E+01 |  |  |
| 7983606 | NM_014335   | EID1        | EP300 interacting inhibitor of differentiation 1           | -0.029 | 0.980 | 8.25E-01 | 8.25E+01 |  |  |
| 7983616 | NM_00100155 | GALK2       | galactokinase 2                                            | 0.130  | 1.095 | 1.69E-01 | 1.69E+01 |  |  |
| 7983648 | ---         | ---         | ---                                                        | -0.176 | 0.885 | 7.09E-01 | 7.09E+01 |  |  |
| 7983663 | NM_005154   | USP8        | ubiquitin specific peptidase 8                             | 0.073  | 1.052 | 6.54E-01 | 6.54E+01 |  |  |
| 7983677 | ---         | ---         | ---                                                        | 0.016  | 1.011 | 9.49E-01 | 9.49E+01 |  |  |
| 7983679 | NM_007347   | AP4E1       | adaptor-related protein complex 4                          | 0.051  | 1.036 | 7.97E-01 | 7.97E+01 |  |  |
| 7983734 | NM_014548   | TMOD2       | tropomodulin 2 (neuronal)                                  | -0.044 | 0.970 | 8.31E-01 | 8.31E+01 |  |  |
| 7983744 | NM_014547   | TMOD3       | tropomodulin 3 (ubiquitous)                                | -0.035 | 0.976 | 8.46E-01 | 8.46E+01 |  |  |
| 7983761 | ---         | ---         | ---                                                        | -0.079 | 0.947 | 8.43E-01 | 8.43E+01 |  |  |
| 7983763 | NM_002748   | MAPK6       | mitogen-activated protein kinase 6                         | 0.061  | 1.044 | 7.41E-01 | 7.41E+01 |  |  |
| 7983771 | ---         | ---         | ---                                                        | 0.222  | 1.166 | 4.60E-01 | 4.60E+01 |  |  |
| 7983773 | ---         | ---         | ---                                                        | 0.063  | 1.045 | 7.38E-01 | 7.38E+01 |  |  |
| 7983811 | NM_004855   | PIGB        | phosphatidylinositol glycan anchor                         | 0.116  | 1.084 | 3.76E-01 | 3.76E+01 |  |  |
| 7983826 | ---         | ---         | ---                                                        | -0.105 | 0.930 | 5.33E-01 | 5.33E+01 |  |  |
| 7983843 | NM_207036   | TCF12       | transcription factor 12                                    | 0.014  | 1.010 | 9.23E-01 | 9.23E+01 |  |  |
| 7983910 | NM_020980   | AQP9        | aquaporin 9                                                | -0.664 | 0.631 | 2.53E-01 | 2.53E+01 |  |  |
| 7983938 | ---         | ---         | ---                                                        | -0.019 | 0.987 | 9.10E-01 | 9.10E+01 |  |  |
| 7983940 | NM_00104045 | FAM63B      | family with sequence similarity 63                         | -0.158 | 0.896 | 4.64E-01 | 4.64E+01 |  |  |
| 7983951 | ---         | ---         | ---                                                        | 0.094  | 1.067 | 7.84E-01 | 7.84E+01 |  |  |
| 7983953 | NM_017610   | RNF111      | ring finger protein 111                                    | 0.053  | 1.038 | 6.89E-01 | 6.89E+01 |  |  |
| 7983979 | ---         | ---         | ---                                                        | 0.151  | 1.110 | 2.95E-01 | 2.95E+01 |  |  |
| 7983987 | ---         | ---         | ---                                                        | 0.059  | 1.042 | 6.99E-01 | 6.99E+01 |  |  |
| 7984008 | ---         | ---         | ---                                                        | -0.108 | 0.928 | 7.49E-01 | 7.49E+01 |  |  |
| 7984011 | NM_012182   | FOXB1       | forkhead box B1                                            | -0.038 | 0.974 | 7.92E-01 | 7.92E+01 |  |  |
| 7984014 | ---         | ---         | ---                                                        | -0.086 | 0.942 | 5.08E-01 | 5.08E+01 |  |  |
| 7984016 | NM_207322   | FAM148A     | family with sequence similarity 14                         | 0.006  | 1.004 | 9.75E-01 | 9.75E+01 |  |  |
| 7984079 | NM_000366   | TPM1        | tropomyosin 1 (alpha)                                      | 0.043  | 1.030 | 7.78E-01 | 7.78E+01 |  |  |
| 7984103 | NM_032857   | LACTB       | lactamase, beta                                            | 0.094  | 1.068 | 6.74E-01 | 6.74E+01 |  |  |
| 7984112 | NM_016530   | RAB8B       | RAB8B, member RAS oncogene family                          | 0.013  | 1.009 | 9.56E-01 | 9.56E+01 |  |  |
| 7984124 | NM_031301   | APH1B       | anterior pharynx defective 1 homolog                       | -0.129 | 0.914 | 5.26E-01 | 5.26E+01 |  |  |
| 7984132 | NM_006537   | USP3        | ubiquitin specific peptidase 3                             | -0.045 | 0.970 | 7.68E-01 | 7.68E+01 |  |  |
| 7984155 | NM_003099   | SNX1        | sorting nexin 1                                            | 0.181  | 1.134 | 1.02E-01 | 1.02E+01 |  |  |
| 7984174 | NM_024798   | SNX22       | sorting nexin 22                                           | -0.045 | 0.969 | 6.89E-01 | 6.89E+01 |  |  |
| 7984188 | ---         | ---         | ---                                                        | 0.065  | 1.046 | 8.10E-01 | 8.10E+01 |  |  |
| 7984190 | NM_016213   | TRIP4       | thyroid hormone receptor interacting protein 4             | 0.091  | 1.065 | 6.68E-01 | 6.68E+01 |  |  |
| 7984203 | NM_015042   | ZNF609      | zinc finger protein 609                                    | -0.065 | 0.956 | 6.98E-01 | 6.98E+01 |  |  |
| 7984217 | NM_025201   | PLEKHO2     | pleckstrin homology domain containing 2                    | 0.082  | 1.059 | 6.02E-01 | 6.02E+01 |  |  |
| 7984227 | NM_182703   | ANKDD1A     | ankyrin repeat and death domain 1A                         | 0.037  | 1.026 | 7.23E-01 | 7.23E+01 |  |  |
| 7984245 | NM_178859   | OSTbeta     | organic solute transporter beta                            | -0.078 | 0.947 | 3.36E-01 | 3.36E+01 |  |  |
| 7984253 | NM_00110136 | hCG_1645727 | hCG1645727                                                 | 0.000  | 1.000 | 1.00E+00 | 1.00E+02 |  |  |
| 7984263 | NM_016395   | PTPLAD1     | protein tyrosine phosphatase-like domain 1                 | -0.040 | 0.972 | 8.11E-01 | 8.11E+01 |  |  |
| 7984276 | NM_004727   | SLC24A1     | solute carrier family 24 (sodium/potassium)                | 0.019  | 1.013 | 9.22E-01 | 9.22E+01 |  |  |
| 7984289 | NM_004663   | RAB11A      | RAB11A, member RAS oncogene family                         | 0.037  | 1.026 | 7.62E-01 | 7.62E+01 |  |  |
| 7984298 | NM_133375   | DIS3L       | DIS3 mitotic control homolog (S. cerevisiae)               | 0.062  | 1.044 | 7.59E-01 | 7.59E+01 |  |  |
| 7984319 | NM_002755   | MAP2K1      | mitogen-activated protein kinase 1                         | -0.122 | 0.919 | 1.66E-01 | 1.66E+01 |  |  |
| 7984353 | NR_027654   | SMAD6       | SMAD family member 6                                       | -0.016 | 0.989 | 8.80E-01 | 8.80E+01 |  |  |
| 7984364 | NM_005902   | SMAD3       | SMAD family member 3                                       | -0.137 | 0.910 | 3.60E-01 | 3.60E+01 |  |  |
| 7984405 | NM_00114393 | C15orf61    | chromosome 15 open reading frame 61                        | 0.020  | 1.014 | 9.53E-01 | 9.53E+01 |  |  |
| 7984408 | NM_145160   | MAP2K5      | mitogen-activated protein kinase 5                         | -0.052 | 0.965 | 7.86E-01 | 7.86E+01 |  |  |
| 7984436 | NM_00103180 | LBXCOR1     | Lbxcor1 homolog (mouse)                                    | 0.016  | 1.011 | 9.08E-01 | 9.08E+01 |  |  |
| 7984453 | NM_016166   | PIAS1       | protein inhibitor of activated STAT1                       | 0.064  | 1.045 | 6.51E-01 | 6.51E+01 |  |  |
| 7984470 | NM_015322   | FEM1B       | fem-1 homolog b (C. elegans)                               | 0.144  | 1.105 | 1.23E-02 | 1.23E+00 |  |  |
| 7984517 | NM_015554   | GLCE        | glucuronic acid epimerase                                  | 0.054  | 1.038 | 8.33E-01 | 8.33E+01 |  |  |
| 7984538 | ---         | ---         | ---                                                        | 0.008  | 1.006 | 9.65E-01 | 9.65E+01 |  |  |
| 7984540 | NM_138555   | KIF23       | kinesin family member 23                                   | 0.230  | 1.173 | 2.39E-01 | 2.39E+01 |  |  |
| 7984562 | NM_001003   | RPLP1       | ribosomal protein, large, P1                               | -0.050 | 0.966 | 7.56E-01 | 7.56E+01 |  |  |
| 7984606 | NM_014249   | NR2E3       | nuclear receptor subfamily 2, group 3                      | -0.019 | 0.987 | 8.94E-01 | 8.94E+01 |  |  |
| 7984620 | ---         | ---         | ---                                                        | -0.061 | 0.958 | 8.02E-01 | 8.02E+01 |  |  |
| 7984624 | ---         | ---         | ---                                                        | -0.208 | 0.866 | 5.24E-01 | 5.24E+01 |  |  |
| 7984641 | NM_005744   | ARIH1       | ariadne homolog, ubiquitin-conjugase 1                     | -0.060 | 0.959 | 6.31E-01 | 6.31E+01 |  |  |
| 7984660 | ---         | ---         | ---                                                        | -0.141 | 0.907 | 2.26E-01 | 2.26E+01 |  |  |
| 7984662 | NM_018652   | GOLGA6B     | golgi autoantigen, golgin subfamily 6B                     | -0.036 | 0.975 | 6.78E-01 | 6.78E+01 |  |  |
| 7984686 | NM_033028   | BBS4        | Bardet-Biedl syndrome 4                                    | 0.093  | 1.067 | 6.52E-01 | 6.52E+01 |  |  |
| 7984704 | NM_002499   | NEO1        | neogenin homolog 1 (chicken)                               | -0.037 | 0.975 | 8.93E-01 | 8.93E+01 |  |  |

|         |              |              |                                      |        |       |          |          |  |  |
|---------|--------------|--------------|--------------------------------------|--------|-------|----------|----------|--|--|
| 7984743 | NM_00102473  | CD276        | CD276 molecule                       | 0.079  | 1.057 | 6.30E-01 | 6.30E+01 |  |  |
| 7984759 | NM_153356    | TBC1D21      | TBC1 domain family, member 21        | 0.006  | 1.004 | 9.77E-01 | 9.77E+01 |  |  |
| 7984771 | NM_005576    | LOXL1        | lysyl oxidase-like 1                 | 0.001  | 1.001 | 9.97E-01 | 9.97E+01 |  |  |
| 7984779 | NM_033240    | PML          | promyelocytic leukemia               | 0.033  | 1.023 | 8.62E-01 | 8.62E+01 |  |  |
| 7984799 | ---          | ---          | ---                                  | 0.004  | 1.003 | 9.85E-01 | 9.85E+01 |  |  |
| 7984819 | NM_025055    | CCDC33       | coiled-coil domain containing 33     | 0.010  | 1.007 | 9.27E-01 | 9.27E+01 |  |  |
| 7984843 | NM_006465    | ARID3B       | AT rich interactive domain 3B (BRI   | -0.118 | 0.921 | 5.92E-01 | 5.92E+01 |  |  |
| 7984846 | NM_00113002  | CLK3         | CDC-like kinase 3                    | -0.006 | 0.996 | 9.78E-01 | 9.78E+01 |  |  |
| 7984862 | NM_000761    | CYP1A2       | cytochrome P450, family 1, subfa     | -0.011 | 0.992 | 9.44E-01 | 9.44E+01 |  |  |
| 7984871 | NM_004383    | CSK          | c-src tyrosine kinase                | 0.074  | 1.053 | 4.36E-01 | 4.36E+01 |  |  |
| 7984892 | NM_021819    | LMAN1L       | lectin, mannose-binding, 1 like      | -0.056 | 0.962 | 4.88E-01 | 4.88E+01 |  |  |
| 7984922 | NM_002435    | MPI          | mannose phosphate isomerase          | 0.047  | 1.033 | 7.46E-01 | 7.46E+01 |  |  |
| 7984932 | NM_138967    | SCAMP5       | secretory carrier membrane prote     | -0.031 | 0.978 | 8.71E-01 | 8.71E+01 |  |  |
| 7984952 | NM_015492    | C15orf39     | chromosome 15 open reading fram      | 0.018  | 1.012 | 8.93E-01 | 8.93E+01 |  |  |
| 7984961 | NM_018652    | GOLGA6B      | golgi autoantigen, golgin subfamili  | -0.038 | 0.974 | 6.57E-01 | 6.57E+01 |  |  |
| 7984985 | NM_00103864  | GOLGA6       | golgi autoantigen, golgin subfamili  | -0.057 | 0.961 | 8.37E-01 | 8.37E+01 |  |  |
| 7984989 | NM_017828    | COMM4        | COMM domain containing 4             | 0.051  | 1.036 | 7.27E-01 | 7.27E+01 |  |  |
| 7985001 | NM_024608    | NEIL1        | nei endonuclease VIII-like 1 (E. col | -0.079 | 0.947 | 3.98E-01 | 3.98E+01 |  |  |
| 7985023 | ---          | ---          | ---                                  | -0.004 | 0.997 | 9.86E-01 | 9.86E+01 |  |  |
| 7985030 | ENST00000428 | DNM1P35      | DNM1 pseudogene 35                   | -0.052 | 0.964 | 7.16E-01 | 7.16E+01 |  |  |
| 7985034 | ---          | ---          | ---                                  | -0.038 | 0.974 | 9.01E-01 | 9.01E+01 |  |  |
| 7985044 | NM_173469    | UBE2Q2       | ubiquitin-conjugating enzyme E2C     | -0.060 | 0.959 | 5.80E-01 | 5.80E+01 |  |  |
| 7985053 | NM_147188    | FBXO22       | F-box protein 22                     | -0.037 | 0.974 | 8.33E-01 | 8.33E+01 |  |  |
| 7985066 | NM_152335    | C15orf27     | chromosome 15 open reading fram      | 0.006  | 1.004 | 9.74E-01 | 9.74E+01 |  |  |
| 7985080 | NM_145805    | ISL2         | ISL LIM homeobox 2                   | -0.049 | 0.966 | 6.60E-01 | 6.60E+01 |  |  |
| 7985089 | NM_002902    | RCN2         | reticulocalbin 2, EF-hand calcium b  | -0.070 | 0.953 | 5.48E-01 | 5.48E+01 |  |  |
| 7985099 | NM_003978    | PSTPIP1      | proline-serine-threonine phosphat    | -0.059 | 0.960 | 5.74E-01 | 5.74E+01 |  |  |
| 7985117 | ---          | ---          | ---                                  | 0.032  | 1.022 | 8.27E-01 | 8.27E+01 |  |  |
| 7985119 | NM_018200    | HMG20A       | high-mobility group 20A              | 0.006  | 1.004 | 9.81E-01 | 9.81E+01 |  |  |
| 7985134 | NM_005530    | IDH3A        | isocitrate dehydrogenase 3 (NAD+     | 0.053  | 1.038 | 7.48E-01 | 7.48E+01 |  |  |
| 7985147 | NM_018602    | DNAJA4       | DnaJ (Hsp40) homolog, subfamily,     | -0.063 | 0.957 | 7.27E-01 | 7.27E+01 |  |  |
| 7985166 | NM_004136    | IREB2        | iron-responsive element binding p    | 0.127  | 1.092 | 2.26E-01 | 2.26E+01 |  |  |
| 7985202 | NM_002789    | PSMA4        | proteasome (prosome, macropain)      | 0.101  | 1.073 | 5.88E-01 | 5.88E+01 |  |  |
| 7985221 | ---          | ---          | ---                                  | -0.143 | 0.906 | 2.99E-01 | 2.99E+01 |  |  |
| 7985224 | NM_144572    | TBC1D2B      | TBC1 domain family, member 2B        | -0.061 | 0.958 | 8.92E-01 | 8.92E+01 |  |  |
| 7985226 | NM_206839    | MORF4L1      | mortality factor 4 like 1            | -0.016 | 0.989 | 9.00E-01 | 9.00E+01 |  |  |
| 7985233 | NM_002891    | RASGRF1      | Ras protein-specific guanine nucle   | -0.050 | 0.966 | 8.13E-01 | 8.13E+01 |  |  |
| 7985240 | NM_007364    | TMED3        | transmembrane emp24 protein tra      | -0.008 | 0.995 | 9.64E-01 | 9.64E+01 |  |  |
| 7985248 | NM_015206    | KIAA1024     | KIAA1024                             | -0.055 | 0.963 | 7.44E-01 | 7.44E+01 |  |  |
| 7985253 | BC101201     | C15orf37     | chromosome 15 open reading fram      | -0.041 | 0.972 | 7.87E-01 | 7.87E+01 |  |  |
| 7985257 | ---          | ---          | ---                                  | -0.019 | 0.987 | 9.14E-01 | 9.14E+01 |  |  |
| 7985259 | NM_019006    | ZFAND6       | zinc finger, AN1-type domain 6       | 0.016  | 1.011 | 9.49E-01 | 9.49E+01 |  |  |
| 7985266 | ---          | ---          | ---                                  | 0.056  | 1.040 | 7.73E-01 | 7.73E+01 |  |  |
| 7985268 | NM_000137    | FAH          | fumarylacetoacetate hydrolase (fu    | -0.094 | 0.937 | 5.26E-01 | 5.26E+01 |  |  |
| 7985285 | NM_014862    | ARNT2        | aryl-hydrocarbon receptor nuclear    | 0.268  | 1.204 | 2.74E-01 | 2.74E+01 |  |  |
| 7985310 | NM_021214    | FAM108C1     | family with sequence similarity 10   | -0.029 | 0.980 | 8.96E-01 | 8.96E+01 |  |  |
| 7985317 | NM_018689    | KIAA1199     | KIAA1199                             | 0.113  | 1.082 | 8.72E-01 | 8.72E+01 |  |  |
| 7985349 | NM_022566    | MESDC1       | mesoderm development candidat        | -0.060 | 0.959 | 6.57E-01 | 6.57E+01 |  |  |
| 7985364 | NM_172217    | IL16         | interleukin 16 (lymphocyte chemo     | -0.010 | 0.993 | 9.40E-01 | 9.40E+01 |  |  |
| 7985402 | NR_024474    | LOC100133144 | hypothetical protein LOC1001331      | -0.095 | 0.936 | 5.48E-01 | 5.48E+01 |  |  |
| 7985409 | NR_003246    | FLJ40113     | golgi autoantigen, golgin subfamili  | -0.116 | 0.923 | 2.28E-01 | 2.28E+01 |  |  |
| 7985418 | ENST00000342 | LOC440297    | chondroitin sulfate proteoglycan 4   | -0.052 | 0.964 | 4.03E-01 | 4.03E+01 |  |  |
| 7985431 | NR_026811    | LOC80154     | hypothetical LOC80154                | -0.055 | 0.962 | 3.80E-01 | 3.80E+01 |  |  |
| 7985444 | NR_003661    | FLJ43276     | similar to ubiquitin-conjugating en  | -0.095 | 0.936 | 5.15E-01 | 5.15E+01 |  |  |
| 7985450 | NR_003246    | FLJ40113     | golgi autoantigen, golgin subfamili  | -0.116 | 0.923 | 2.28E-01 | 2.28E+01 |  |  |
| 7985459 | ENST00000342 | LOC440297    | chondroitin sulfate proteoglycan 4   | -0.052 | 0.964 | 4.03E-01 | 4.03E+01 |  |  |
| 7985472 | NR_003246    | FLJ40113     | golgi autoantigen, golgin subfamili  | -0.116 | 0.922 | 3.38E-01 | 3.38E+01 |  |  |
| 7985482 | NM_00108043  | WHAMM        | WAS protein homolog associated w     | 0.004  | 1.002 | 9.86E-01 | 9.86E+01 |  |  |
| 7985488 | BC112329     | FAM103A1     | family with sequence similarity 10   | 0.048  | 1.034 | 5.99E-01 | 5.99E+01 |  |  |
| 7985493 | NM_023003    | TM6SF1       | transmembrane 6 superfamily me       | 0.460  | 1.376 | 5.45E-02 | 5.45E+00 |  |  |
| 7985562 | NR_003246    | FLJ40113     | golgi autoantigen, golgin subfamili  | -0.117 | 0.922 | 3.41E-01 | 3.41E+01 |  |  |
| 7985571 | NR_026811    | LOC80154     | hypothetical LOC80154                | -0.028 | 0.981 | 8.29E-01 | 8.29E+01 |  |  |
| 7985577 | NM_181877    | ZSCAN2       | zinc finger and SCAN domain cont     | -0.115 | 0.923 | 1.73E-01 | 1.73E+01 |  |  |
| 7985587 | NR_004859    | SCAN2        | SCAN domain containing 2 pseudo      | 0.039  | 1.027 | 8.08E-01 | 8.08E+01 |  |  |
| 7985605 | NM_014630    | ZNF592       | zinc finger protein 592              | -0.020 | 0.986 | 9.09E-01 | 9.09E+01 |  |  |
| 7985620 | NM_020778    | ALPK3        | alpha-kinase 3                       | -0.063 | 0.957 | 5.35E-01 | 5.35E+01 |  |  |
| 7985636 | NM_004213    | SLC28A1      | solute carrier family 28 (sodium-co  | -0.010 | 0.993 | 9.40E-01 | 9.40E+01 |  |  |
| 7985662 | NM_002605    | PDE8A        | phosphodiesterase 8A                 | -0.061 | 0.958 | 7.08E-01 | 7.08E+01 |  |  |
| 7985690 | BX648930     | LOC440300    | chondroitin sulfate proteoglycan 4   | -0.032 | 0.978 | 7.69E-01 | 7.69E+01 |  |  |
| 7985695 | NM_006738    | AKAP13       | A kinase (PKA) anchor protein 13     | -0.056 | 0.962 | 5.09E-01 | 5.09E+01 |  |  |
| 7985757 | NM_022839    | MRP511       | mitochondrial ribosomal protein 5    | -0.084 | 0.943 | 4.48E-01 | 4.48E+01 |  |  |
| 7985765 | ---          | ---          | ---                                  | 0.001  | 1.001 | 9.95E-01 | 9.95E+01 |  |  |
| 7985767 | NM_022767    | AEN          | apoptosis enhancing nuclease         | 0.048  | 1.034 | 7.04E-01 | 7.04E+01 |  |  |
| 7985777 | NM_002201    | ISG20        | interferon stimulated exonuclease    | 0.009  | 1.006 | 9.81E-01 | 9.81E+01 |  |  |
| 7985786 | NM_013227    | ACAN         | aggrecan                             | -0.091 | 0.939 | 2.93E-01 | 2.93E+01 |  |  |
| 7985918 | ---          | ---          | ---                                  | -0.007 | 0.995 | 9.80E-01 | 9.80E+01 |  |  |
| 7985920 | NM_00103995  | MESP2        | mesoderm posterior 2 homolog (n      | -0.044 | 0.970 | 7.07E-01 | 7.07E+01 |  |  |

|         |              |              |                                      |        |       |          |          |  |  |
|---------|--------------|--------------|--------------------------------------|--------|-------|----------|----------|--|--|
| 7985924 | NM_198526    | ZNF710       | zinc finger protein 710              | 0.026  | 1.018 | 8.21E-01 | 8.21E+01 |  |  |
| 7985930 | ---          | ---          | ---                                  | 0.034  | 1.024 | 8.18E-01 | 8.18E+01 |  |  |
| 7985932 | ---          | ---          | ---                                  | 0.020  | 1.014 | 8.81E-01 | 8.81E+01 |  |  |
| 7985934 | NM_020210    | SEMA4B       | sema domain, immunoglobulin do       | -0.040 | 0.972 | 7.25E-01 | 7.25E+01 |  |  |
| 7985983 | NM_016645    | NGRN         | neugrin, neurite outgrowth associ    | 0.001  | 1.001 | 9.94E-01 | 9.94E+01 |  |  |
| 7985997 | ---          | ---          | ---                                  | -0.090 | 0.940 | 6.82E-01 | 6.82E+01 |  |  |
| 7986001 | ENST00000338 | LOC728477    | similar to hCG27445                  | -0.023 | 0.984 | 8.84E-01 | 8.84E+01 |  |  |
| 7986004 | NM_00100430  | ZNF774       | zinc finger protein 774              | 0.020  | 1.014 | 9.05E-01 | 9.05E+01 |  |  |
| 7986010 | NM_003870    | IQGAP1       | IQ motif containing GTPase activat   | 0.068  | 1.048 | 7.41E-01 | 7.41E+01 |  |  |
| 7986049 | NM_022769    | CRTC3        | CREB regulated transcription coac    | 0.054  | 1.038 | 5.53E-01 | 5.53E+01 |  |  |
| 7986068 | NM_000057    | BLM          | Bloom syndrome, RecQ helicase-li     | -0.029 | 0.980 | 9.51E-01 | 9.51E+01 |  |  |
| 7986092 | NM_002569    | FURIN        | furin (paired basic amino acid clea  | -0.137 | 0.909 | 3.02E-01 | 3.02E+01 |  |  |
| 7986110 | NM_002005    | FES          | feline sarcoma oncogene              | -0.054 | 0.963 | 5.34E-01 | 5.34E+01 |  |  |
| 7986132 | NM_006122    | MAN2A2       | mannosidase, alpha, class 2A, mer    | -0.037 | 0.975 | 7.58E-01 | 7.58E+01 |  |  |
| 7986160 | NM_00103967  | UNC45A       | unc-45 homolog A (C. elegans)        | -0.006 | 0.996 | 9.75E-01 | 9.75E+01 |  |  |
| 7986186 | NM_033544    | RCCD1        | RC1 domain containing 1              | 0.018  | 1.013 | 9.16E-01 | 9.16E+01 |  |  |
| 7986214 | NM_013272    | SLCO3A1      | solute carrier organic anion transp  | 0.157  | 1.115 | 3.18E-01 | 3.18E+01 |  |  |
| 7986246 | ---          | ---          | ---                                  | 0.003  | 1.002 | 9.91E-01 | 9.91E+01 |  |  |
| 7986248 | AY358245     | UNQ6190      | AGVR6190                             | -0.011 | 0.993 | 9.57E-01 | 9.57E+01 |  |  |
| 7986250 | NM_001271    | CHD2         | chromodomain helicase DNA bind       | -0.105 | 0.930 | 8.87E-02 | 8.87E+00 |  |  |
| 7986293 | NM_018349    | MCTP2        | multiple C2 domains, transmembr      | -0.049 | 0.967 | 8.78E-01 | 8.78E+01 |  |  |
| 7986323 | NM_015710    | GLTSCR2      | glioma tumor suppressor candidat     | -0.030 | 0.980 | 9.19E-01 | 9.19E+01 |  |  |
| 7986329 | NM_021005    | NR2F2        | nuclear receptor subfamily 2, grou   | -0.072 | 0.952 | 5.55E-01 | 5.55E+01 |  |  |
| 7986336 | ENST00000444 | LOC728800    | similar to FLJ00402 protein          | 0.043  | 1.031 | 7.17E-01 | 7.17E+01 |  |  |
| 7986350 | NM_183376    | ARRDC4       | arrestin domain containing 4         | 0.178  | 1.131 | 6.35E-01 | 6.35E+01 |  |  |
| 7986359 | NM_000875    | IGF1R        | insulin-like growth factor 1 recept  | -0.013 | 0.991 | 9.72E-01 | 9.72E+01 |  |  |
| 7986383 | NM_000875    | IGF1R        | insulin-like growth factor 1 recept  | -0.016 | 0.989 | 9.67E-01 | 9.67E+01 |  |  |
| 7986385 | NM_145728    | SYNM         | synemin, intermediate filament pr    | -0.134 | 0.911 | 5.65E-01 | 5.65E+01 |  |  |
| 7986394 | NM_144598    | LRRC28       | leucine rich repeat containing 28    | 0.057  | 1.040 | 7.89E-01 | 7.89E+01 |  |  |
| 7986411 | NM_005587    | MEF2A        | myocyte enhancer factor 2A           | 0.202  | 1.150 | 6.75E-03 | 6.75E-01 |  |  |
| 7986428 | AK127420     | LOC400464    | similar to FLJ43276 protein          | 0.016  | 1.011 | 9.30E-01 | 9.30E+01 |  |  |
| 7986433 | NM_198243    | ASB7         | ankyrin repeat and SOCS box-cont     | -0.091 | 0.939 | 4.49E-01 | 4.49E+01 |  |  |
| 7986442 | ---          | ---          | ---                                  | -0.154 | 0.899 | 4.20E-01 | 4.20E+01 |  |  |
| 7986444 | AK056534     | LOC145757    | hypothetical LOC145757               | -0.008 | 0.994 | 9.67E-01 | 9.67E+01 |  |  |
| 7986446 | NM_000693    | ALDH1A3      | aldehyde dehydrogenase 1 family,     | -0.004 | 0.997 | 9.85E-01 | 9.85E+01 |  |  |
| 7986463 | NM_024652    | LRRK1        | leucine-rich repeat kinase 1         | 0.130  | 1.095 | 7.63E-02 | 7.63E+00 |  |  |
| 7986501 | ---          | ---          | ---                                  | 0.079  | 1.056 | 8.82E-01 | 8.82E+01 |  |  |
| 7986503 | NR_003260    | C15orf51     | dynamitin 1 pseudogene               | -0.085 | 0.943 | 5.82E-01 | 5.82E+01 |  |  |
| 7986509 | ENST00000423 | C15orf51     | dynamitin 1 pseudogene               | 0.000  | 1.000 | 1.00E+00 | 1.00E+02 |  |  |
| 7986512 | ENST00000426 | LOC100289668 | similar to dynamitin 1               | 0.000  | 1.000 | 1.00E+00 | 1.00E+02 |  |  |
| 7986515 | ENST00000426 | LOC100289668 | similar to dynamitin 1               | 0.120  | 1.087 | 7.61E-01 | 7.61E+01 |  |  |
| 7986517 | ENST00000423 | C15orf51     | dynamitin 1 pseudogene               | -0.033 | 0.978 | 9.58E-01 | 9.58E+01 |  |  |
| 7986520 | AK302717     | C15orf51     | dynamitin 1 pseudogene               | -0.013 | 0.991 | 9.85E-01 | 9.85E+01 |  |  |
| 7986522 | ENST00000423 | C15orf51     | dynamitin 1 pseudogene               | -0.033 | 0.978 | 9.58E-01 | 9.58E+01 |  |  |
| 7986525 | ENST00000426 | LOC100289668 | similar to dynamitin 1               | 0.120  | 1.087 | 7.61E-01 | 7.61E+01 |  |  |
| 7986527 | AK125787     | C15orf51     | dynamitin 1 pseudogene               | 0.000  | 1.000 | 1.00E+00 | 1.00E+02 |  |  |
| 7986541 | NR_003659    | WASH3P       | WAS protein family homolog 3 pse     | -0.049 | 0.966 | 6.27E-01 | 6.27E+01 |  |  |
| 7986561 | ENST00000338 | VSIG7        | V-set and immunoglobulin domain      | -0.002 | 0.999 | 9.94E-01 | 9.94E+01 |  |  |
| 7986565 | XM_00112627  | LOC648913    | similar to a disintegrin and metallo | 0.095  | 1.068 | 2.70E-01 | 2.70E+01 |  |  |
| 7986567 | ---          | ---          | ---                                  | 0.114  | 1.082 | 4.25E-01 | 4.25E+01 |  |  |
| 7986569 | NR_002824    | HERC2P2      | hect domain and RLD 2 pseudogen      | -0.006 | 0.996 | 9.80E-01 | 9.80E+01 |  |  |
| 7986598 | NM_00100141  | LOC283767    | golgi autoantigen, golgin subfamil   | 0.045  | 1.031 | 8.32E-01 | 8.32E+01 |  |  |
| 7986633 | ---          | ---          | ---                                  | 0.114  | 1.082 | 4.25E-01 | 4.25E+01 |  |  |
| 7986639 | ENST00000338 | VSIG6        | V-set and immunoglobulin domain      | 0.062  | 1.044 | 7.73E-01 | 7.73E+01 |  |  |
| 7986642 | NR_027407    | GOLGA8D      | golgi autoantigen, golgin subfamil   | -0.036 | 0.975 | 6.48E-01 | 6.48E+01 |  |  |
| 7986661 | ---          | ---          | ---                                  | 0.041  | 1.029 | 8.06E-01 | 8.06E+01 |  |  |
| 7986665 | NM_030922    | NIPA2        | non imprinted in Prader-Willi/Ang    | 0.140  | 1.102 | 5.53E-02 | 5.53E+00 |  |  |
| 7986675 | NM_144599    | NIPA1        | non imprinted in Prader-Willi/Ang    | -0.146 | 0.904 | 2.26E-01 | 2.26E+01 |  |  |
| 7986687 | NR_003521    | WHAMML1      | WAS protein homolog associated       | -0.071 | 0.952 | 7.33E-01 | 7.33E+01 |  |  |
| 7986701 | NR_002824    | HERC2P2      | hect domain and RLD 2 pseudogen      | -0.022 | 0.985 | 9.16E-01 | 9.16E+01 |  |  |
| 7986736 | NM_00100141  | LOC283767    | golgi autoantigen, golgin subfamil   | 0.018  | 1.013 | 9.49E-01 | 9.49E+01 |  |  |
| 7986741 | NM_00100141  | LOC283767    | golgi autoantigen, golgin subfamil   | 0.036  | 1.026 | 8.70E-01 | 8.70E+01 |  |  |
| 7986744 | BC129821     | LOC283685    | golgi autoantigen, golgin subfamil   | 0.031  | 1.022 | 8.48E-01 | 8.48E+01 |  |  |
| 7986765 | NM_000969    | RPL5         | ribosomal protein L5                 | -0.042 | 0.972 | 7.25E-01 | 7.25E+01 |  |  |
| 7986767 | BC069077     | C15orf49     | chromosome 15 open reading fram      | -0.064 | 0.957 | 5.97E-01 | 5.97E+01 |  |  |
| 7986769 | NM_130839    | UBE3A        | ubiquitin protein ligase E3A         | 0.046  | 1.032 | 7.15E-01 | 7.15E+01 |  |  |
| 7986789 | NM_024490    | ATP10A       | ATPase, class V, type 10A            | 0.110  | 1.079 | 2.61E-01 | 2.61E+01 |  |  |
| 7986820 | ---          | ---          | ---                                  | -0.099 | 0.934 | 3.87E-01 | 3.87E+01 |  |  |
| 7986822 | NM_000814    | GABRB3       | gamma-aminobutyric acid (GABA)       | -0.075 | 0.949 | 5.41E-01 | 5.41E+01 |  |  |
| 7986838 | NM_000275    | OCA2         | oculocutaneous albinism II           | 0.041  | 1.029 | 6.95E-01 | 6.95E+01 |  |  |
| 7986863 | NM_004667    | HERC2        | hect domain and RLD 2                | -0.023 | 0.984 | 8.82E-01 | 8.82E+01 |  |  |
| 7986922 | NM_00101242  | GOLGA8G      | golgi autoantigen, golgin subfamil   | -0.049 | 0.967 | 4.29E-01 | 4.29E+01 |  |  |
| 7986943 | ---          | ---          | ---                                  | 0.041  | 1.029 | 8.06E-01 | 8.06E+01 |  |  |
| 7986945 | ---          | ---          | ---                                  | -0.034 | 0.977 | 8.52E-01 | 8.52E+01 |  |  |
| 7986947 | NR_024074    | GOLGA9P      | golgi autoantigen, golgin subfamil   | -0.015 | 0.989 | 9.36E-01 | 9.36E+01 |  |  |
| 7986960 | NM_015307    | FAM189A1     | family with sequence similarity 18   | -0.055 | 0.962 | 7.11E-01 | 7.11E+01 |  |  |
| 7986969 | NM_138704    | NDNL2        | necdin-like 2                        | -0.081 | 0.945 | 4.24E-01 | 4.24E+01 |  |  |

|         |              |            |                                      |        |       |          |          |  |  |
|---------|--------------|------------|--------------------------------------|--------|-------|----------|----------|--|--|
| 7987012 | NM_139320    | CHRFAM7A   | CHRNA7 (cholinergic receptor, nic    | 0.039  | 1.028 | 7.75E-01 | 7.75E+01 |  |  |
| 7987027 | NR_024074    | GOLGA9P    | golgi autoantigen, golgin subfamili  | 0.013  | 1.009 | 9.53E-01 | 9.53E+01 |  |  |
| 7987046 | ---          | ---        | ---                                  | -0.041 | 0.972 | 8.25E-01 | 8.25E+01 |  |  |
| 7987048 | NM_017762    | MTMR10     | myotubularin related protein 10      | 0.094  | 1.068 | 5.29E-01 | 5.29E+01 |  |  |
| 7987097 | ---          | ---        | ---                                  | 0.002  | 1.001 | 9.90E-01 | 9.90E+01 |  |  |
| 7987099 | NM_130901    | OTUD7A     | OTU domain containing 7A             | -0.048 | 0.967 | 7.26E-01 | 7.26E+01 |  |  |
| 7987110 | ---          | ---        | ---                                  | 0.031  | 1.021 | 8.35E-01 | 8.35E+01 |  |  |
| 7987112 | ---          | ---        | ---                                  | -0.041 | 0.972 | 8.09E-01 | 8.09E+01 |  |  |
| 7987114 | NR_024074    | GOLGA9P    | golgi autoantigen, golgin subfamili  | 0.044  | 1.031 | 7.64E-01 | 7.64E+01 |  |  |
| 7987137 | ---          | ---        | ---                                  | -0.041 | 0.972 | 8.25E-01 | 8.25E+01 |  |  |
| 7987139 | NR_024074    | GOLGA9P    | golgi autoantigen, golgin subfamili  | -0.065 | 0.956 | 7.87E-01 | 7.87E+01 |  |  |
| 7987145 | NM_00110318  | FMN1       | formin 1                             | 0.047  | 1.033 | 9.35E-01 | 9.35E+01 |  |  |
| 7987163 | ENST00000414 | FMN1       | formin 1                             | 0.099  | 1.071 | 8.18E-01 | 8.18E+01 |  |  |
| 7987165 | NM_020371    | AVEN       | apoptosis, caspase activation inhibi | -0.103 | 0.931 | 5.54E-01 | 5.54E+01 |  |  |
| 7987172 | NM_020154    | C15orf24   | chromosome 15 open reading fram      | 0.052  | 1.037 | 8.05E-01 | 8.05E+01 |  |  |
| 7987192 | NM_00104249  | SLC12A6    | solute carrier family 12 (potassium  | 0.027  | 1.019 | 9.00E-01 | 9.00E+01 |  |  |
| 7987225 | NM_018648    | NOP10      | NOP10 ribonucleoprotein homolo       | 0.149  | 1.108 | 3.47E-01 | 3.47E+01 |  |  |
| 7987230 | NM_153613    | LPCAT4     | lysophosphatidylcholine acyltrans    | 0.012  | 1.009 | 9.42E-01 | 9.42E+01 |  |  |
| 7987248 | NR_027410    | GOLGA8B    | golgi autoantigen, golgin subfamili  | -0.082 | 0.945 | 5.17E-01 | 5.17E+01 |  |  |
| 7987279 | NR_027410    | GOLGA8B    | golgi autoantigen, golgin subfamili  | -0.071 | 0.952 | 5.69E-01 | 5.69E+01 |  |  |
| 7987310 | NM_020660    | GJD2       | gap junction protein, delta 2, 36kD  | 0.009  | 1.006 | 9.61E-01 | 9.61E+01 |  |  |
| 7987325 | NM_014691    | AQR        | aquarius homolog (mouse)             | -0.004 | 0.998 | 9.86E-01 | 9.86E+01 |  |  |
| 7987361 | NM_014106    | ZNF770     | zinc finger protein 770              | 0.027  | 1.019 | 8.94E-01 | 8.94E+01 |  |  |
| 7987365 | NM_024865    | NANOG      | Nanog homeobox                       | -0.001 | 0.999 | 9.96E-01 | 9.96E+01 |  |  |
| 7987381 | NR_027320    | CSNK1A1P   | casein kinase 1, alpha 1 pseudoge    | 0.088  | 1.063 | 4.27E-01 | 4.27E+01 |  |  |
| 7987405 | NM_005739    | RASGRP1    | RAS guanyl releasing protein 1 (ca   | -0.112 | 0.925 | 4.97E-01 | 4.97E+01 |  |  |
| 7987439 | NM_007223    | GPR176     | G protein-coupled receptor 176       | -0.005 | 0.996 | 9.74E-01 | 9.74E+01 |  |  |
| 7987449 | NM_003134    | SRP14      | signal recognition particle 14kDa (  | -0.019 | 0.987 | 9.25E-01 | 9.25E+01 |  |  |
| 7987454 | NM_00100394  | BMF        | Bcl2 modifying factor                | -0.201 | 0.870 | 2.29E-02 | 2.29E+00 |  |  |
| 7987466 | ---          | ---        | ---                                  | 0.062  | 1.044 | 6.01E-01 | 6.01E+01 |  |  |
| 7987472 | AK095915     | C15orf56   | chromosome 15 open reading fram      | -0.047 | 0.968 | 6.98E-01 | 6.98E+01 |  |  |
| 7987475 | NM_004573    | PLCB2      | phospholipase C, beta 2              | 0.042  | 1.029 | 7.85E-01 | 7.85E+01 |  |  |
| 7987511 | NM_207380    | C15orf52   | chromosome 15 open reading fram      | -0.057 | 0.961 | 4.43E-01 | 4.43E+01 |  |  |
| 7987526 | NM_00108079  | C15orf57   | chromosome 15 open reading fram      | 0.032  | 1.022 | 9.22E-01 | 9.22E+01 |  |  |
| 7987536 | NM_018145    | FAM82A2    | family with sequence similarity 82   | 0.046  | 1.032 | 6.89E-01 | 6.89E+01 |  |  |
| 7987554 | NM_018163    | DNAJC17    | DnaJ (Hsp40) homolog, subfamily      | -0.064 | 0.957 | 7.53E-01 | 7.53E+01 |  |  |
| 7987565 | NM_017726    | PPP1R14D   | protein phosphatase 1, regulatory    | 0.038  | 1.027 | 7.53E-01 | 7.53E+01 |  |  |
| 7987572 | ---          | ---        | ---                                  | -0.073 | 0.951 | 6.69E-01 | 6.69E+01 |  |  |
| 7987574 | NM_133639    | RHOV       | ras homolog gene family, member      | -0.024 | 0.983 | 8.15E-01 | 8.15E+01 |  |  |
| 7987584 | NM_017553    | INO80      | INO80 homolog (S. cerevisiae)        | 0.025  | 1.018 | 8.52E-01 | 8.52E+01 |  |  |
| 7987650 | NM_002344    | LTK        | leukocyte receptor tyrosine kinase   | -0.019 | 0.987 | 9.19E-01 | 9.19E+01 |  |  |
| 7987675 | NM_015540    | RPAP1      | RNA polymerase II associated prot    | -0.033 | 0.977 | 7.95E-01 | 7.95E+01 |  |  |
| 7987701 | NM_016642    | SPTBN5     | spectrin, beta, non-erythrocytic 5   | -0.013 | 0.991 | 9.16E-01 | 9.16E+01 |  |  |
| 7987772 | NM_139265    | EHD4       | EH-domain containing 4               | -0.064 | 0.956 | 6.70E-01 | 6.70E+01 |  |  |
| 7987792 | NM_178034    | PLA2G4D    | phospholipase A2, group IVD (cyto    | -0.059 | 0.960 | 6.82E-01 | 6.82E+01 |  |  |
| 7987840 | NM_015289    | VPS39      | vacuolar protein sorting 39 homol    | 0.046  | 1.033 | 7.37E-01 | 7.37E+01 |  |  |
| 7987869 | NM_015497    | TMEM87A    | transmembrane protein 87A            | 0.065  | 1.046 | 5.25E-01 | 5.25E+01 |  |  |
| 7987892 | NM_022473    | ZFP106     | zinc finger protein 106 homolog (n   | 0.061  | 1.043 | 6.97E-01 | 6.97E+01 |  |  |
| 7987916 | NM_153260    | LRRCS7     | leucine rich repeat containing 57    | -0.045 | 0.969 | 7.35E-01 | 7.35E+01 |  |  |
| 7987926 | ---          | ---        | ---                                  | -0.348 | 0.785 | 5.83E-01 | 5.83E+01 |  |  |
| 7987928 | NM_138477    | CDAN1      | congenital dyserythropoietic anem    | -0.027 | 0.981 | 8.45E-01 | 8.45E+01 |  |  |
| 7987960 | NM_173500    | TTBK2      | tau tubulin kinase 2                 | -0.065 | 0.956 | 5.73E-01 | 5.73E+01 |  |  |
| 7987981 | NM_174916    | UBR1       | ubiquitin protein ligase E3 compo    | -0.010 | 0.993 | 9.56E-01 | 9.56E+01 |  |  |
| 7988031 | NM_001006    | RPS3A      | ribosomal protein S3A                | 0.008  | 1.006 | 9.53E-01 | 9.53E+01 |  |  |
| 7988033 | NM_000119    | EPB42      | erythrocyte membrane protein ba      | -0.075 | 0.949 | 5.10E-01 | 5.10E+01 |  |  |
| 7988050 | NM_201631    | TGM5       | transglutaminase 5                   | -0.039 | 0.974 | 7.97E-01 | 7.97E+01 |  |  |
| 7988077 | NM_014793    | LCMT2      | leucine carboxyl methyltransferas    | 0.075  | 1.053 | 6.37E-01 | 6.37E+01 |  |  |
| 7988082 | NM_152455    | ZSCAN29    | zinc finger and SCAN domain cont     | -0.098 | 0.934 | 5.35E-01 | 5.35E+01 |  |  |
| 7988091 | ---          | ---        | ---                                  | 0.090  | 1.064 | 7.25E-01 | 7.25E+01 |  |  |
| 7988093 | NM_00114198  | TP53BP1    | tumor protein p53 binding protein    | -0.172 | 0.888 | 8.66E-02 | 8.66E+00 |  |  |
| 7988124 | NM_014659    | HISPPD2A   | histidine acid phosphatase domain    | 0.022  | 1.015 | 9.28E-01 | 9.28E+01 |  |  |
| 7988132 | NM_153700    | STRC       | stereocilin                          | -0.035 | 0.976 | 7.97E-01 | 7.97E+01 |  |  |
| 7988177 | NM_153700    | STRC       | stereocilin                          | -0.038 | 0.974 | 7.83E-01 | 7.83E+01 |  |  |
| 7988208 | NR_002318    | CATSPER2P1 | cation channel, sperm associated     | 0.033  | 1.023 | 9.13E-01 | 9.13E+01 |  |  |
| 7988212 | NM_025165    | ELL3       | elongation factor RNA polymerase     | 0.049  | 1.034 | 8.45E-01 | 8.45E+01 |  |  |
| 7988227 | NM_00103351  | SERINC4    | serine incorporator 4                | -0.014 | 0.990 | 9.14E-01 | 9.14E+01 |  |  |
| 7988245 | NM_005926    | MFAP1      | microfibrillar-associated protein 1  | -0.037 | 0.975 | 7.82E-01 | 7.82E+01 |  |  |
| 7988281 | ---          | ---        | ---                                  | -0.002 | 0.999 | 9.92E-01 | 9.92E+01 |  |  |
| 7988283 | ENST00000313 | LOC645212  | hypothetical LOC645212               | -0.047 | 0.968 | 5.76E-01 | 5.76E+01 |  |  |
| 7988286 | NM_025137    | SPG11      | spastic paraplegia 11 (autosomal r   | 0.090  | 1.064 | 3.67E-01 | 3.67E+01 |  |  |
| 7988327 | NM_00114511  | PATL2      | protein associated with topoisome    | 0.199  | 1.148 | 2.70E-01 | 2.70E+01 |  |  |
| 7988344 | ---          | ---        | ---                                  | 0.073  | 1.052 | 7.01E-01 | 7.01E+01 |  |  |
| 7988346 | ---          | ---        | ---                                  | -0.076 | 0.949 | 4.83E-01 | 4.83E+01 |  |  |
| 7988380 | NM_144565    | DUOXA1     | dual oxidase maturation factor 1     | -0.010 | 0.993 | 9.41E-01 | 9.41E+01 |  |  |
| 7988400 | NM_138356    | SHF        | Src homology 2 domain containing     | 0.051  | 1.036 | 7.15E-01 | 7.15E+01 |  |  |
| 7988414 | NM_001482    | GATM       | glycine amidinotransferase (L-argi   | 0.089  | 1.063 | 7.72E-01 | 7.72E+01 |  |  |
| 7988424 | ---          | ---        | ---                                  | 0.134  | 1.097 | 4.49E-01 | 4.49E+01 |  |  |

|         |             |           |                                      |        |       |          |          |  |  |
|---------|-------------|-----------|--------------------------------------|--------|-------|----------|----------|--|--|
| 7988444 | NM_016132   | MYEF2     | myelin expression factor 2           | 0.053  | 1.037 | 8.43E-01 | 8.43E+01 |  |  |
| 7988581 | NM_014701   | SECISBP2L | SECIS binding protein 2-like         | 0.027  | 1.019 | 8.41E-01 | 8.41E+01 |  |  |
| 7988605 | NM_004236   | COPS2     | COP9 constitutive photomorphoge      | 0.074  | 1.052 | 5.70E-01 | 5.70E+01 |  |  |
| 7988623 | ---         | ---       | ---                                  | -0.055 | 0.962 | 8.66E-01 | 8.66E+01 |  |  |
| 7988644 | NM_024837   | ATP8B4    | ATPase, class I, type 8B, member 4   | -0.065 | 0.956 | 9.03E-01 | 9.03E+01 |  |  |
| 7988685 | ---         | ---       | ---                                  | -0.027 | 0.981 | 8.69E-01 | 8.69E+01 |  |  |
| 7988687 | NM_005254   | GABPB1    | GA binding protein transcription fa  | -0.021 | 0.986 | 9.48E-01 | 9.48E+01 |  |  |
| 7988713 | NM_017672   | TRPM7     | transient receptor potential cation  | 0.018  | 1.013 | 9.10E-01 | 9.10E+01 |  |  |
| 7988753 | NM_032802   | SPPL2A    | signal peptide peptidase-like 2A     | 0.150  | 1.110 | 4.14E-01 | 4.14E+01 |  |  |
| 7988763 | NM_207381   | TNFAIP8L3 | tumor necrosis factor, alpha-induc   | -0.035 | 0.976 | 7.97E-01 | 7.97E+01 |  |  |
| 7988789 | NM_015263   | DMXL2     | Dmx-like 2                           | 0.410  | 1.329 | 3.56E-01 | 3.56E+01 |  |  |
| 7988833 | NM_153374   | LYSMD2    | LysM, putative peptidoglycan-bind    | 0.049  | 1.034 | 6.73E-01 | 6.73E+01 |  |  |
| 7988838 | NM_138792   | LEO1      | Leo1, Paf1/RNA polymerase II con     | -0.048 | 0.967 | 8.13E-01 | 8.13E+01 |  |  |
| 7988859 | NM_006578   | GNB5      | guanine nucleotide binding protei    | -0.071 | 0.952 | 4.50E-01 | 4.50E+01 |  |  |
| 7988921 | NM_000259   | MYO5A     | myosin VA (heavy chain 12, myosi     | 0.091  | 1.065 | 5.87E-01 | 5.87E+01 |  |  |
| 7988963 | NM_006628   | ARPP19    | cAMP-regulated phosphoprotein,       | -0.012 | 0.992 | 9.44E-01 | 9.44E+01 |  |  |
| 7988970 | NM_019600   | KIAA1370  | KIAA1370                             | -0.078 | 0.947 | 6.15E-01 | 6.15E+01 |  |  |
| 7988987 | NM_004498   | ONECUT1   | one cut homeobox 1                   | -0.068 | 0.954 | 5.15E-01 | 5.15E+01 |  |  |
| 7989013 | NM_016304   | RSL24D1   | ribosomal L24 domain containing      | 0.031  | 1.021 | 7.97E-01 | 7.97E+01 |  |  |
| 7989023 | NM_004580   | RAB27A    | RAB27A, member RAS oncogene f        | -0.193 | 0.875 | 1.50E-01 | 1.50E+01 |  |  |
| 7989037 | NM_004748   | CCPG1     | cell cycle progression 1             | 0.048  | 1.034 | 8.80E-01 | 8.80E+01 |  |  |
| 7989128 | NM_144571   | CNOT6L    | CCR4-NOT transcription complex,      | -0.059 | 0.960 | 6.68E-01 | 6.68E+01 |  |  |
| 7989132 | NM_022841   | RFX7      | regulatory factor X, 7               | 0.018  | 1.013 | 9.37E-01 | 9.37E+01 |  |  |
| 7989144 | ---         | ---       | ---                                  | 0.208  | 1.155 | 2.75E-01 | 2.75E+01 |  |  |
| 7989159 | NM_017661   | ZNF280D   | zinc finger protein 280D             | 0.070  | 1.049 | 6.31E-01 | 6.31E+01 |  |  |
| 7989193 | ---         | ---       | ---                                  | -0.022 | 0.985 | 9.61E-01 | 9.61E+01 |  |  |
| 7989195 | ---         | ---       | ---                                  | 0.135  | 1.098 | 7.08E-01 | 7.08E+01 |  |  |
| 7989218 | ---         | ---       | ---                                  | -0.242 | 0.845 | 4.01E-01 | 4.01E+01 |  |  |
| 7989224 | NM_001110   | ADAM10    | ADAM metallopeptidase domain 1       | 0.074  | 1.052 | 7.34E-01 | 7.34E+01 |  |  |
| 7989243 | ---         | ---       | ---                                  | -0.057 | 0.962 | 8.76E-01 | 8.76E+01 |  |  |
| 7989245 | NR_002927   | HSP90AB4P | heat shock protein 90kDa alpha (c    | 0.013  | 1.009 | 9.53E-01 | 9.53E+01 |  |  |
| 7989251 | ---         | ---       | ---                                  | 0.024  | 1.017 | 9.00E-01 | 9.00E+01 |  |  |
| 7989253 | NM_024755   | SLTM      | SAFB-like, transcription modulator   | -0.023 | 0.984 | 8.15E-01 | 8.15E+01 |  |  |
| 7989315 | NM_004492   | GTF2A2    | general transcription factor IIA, 2, | 0.082  | 1.059 | 6.68E-01 | 6.68E+01 |  |  |
| 7989323 | NM_004330   | BNIP2     | BCL2/adenovirus E1B 19kDa intera     | 0.066  | 1.047 | 6.11E-01 | 6.11E+01 |  |  |
| 7989335 | NM_00100285 | ANXA2     | annexin A2                           | 0.205  | 1.152 | 3.33E-01 | 3.33E+01 |  |  |
| 7989347 | NM_024611   | NARG2     | NMDA receptor regulated 2            | 0.086  | 1.062 | 3.99E-01 | 3.99E+01 |  |  |
| 7989365 | NM_134260   | RORA      | RAR-related orphan receptor A        | -0.168 | 0.890 | 1.83E-01 | 1.83E+01 |  |  |
| 7989387 | NM_020821   | VPS13C    | vacuolar protein sorting 13 homol    | 0.143  | 1.105 | 5.37E-02 | 5.37E+00 |  |  |
| 7989473 | NM_00100759 | FAM148B   | family with sequence similarity 14   | 0.022  | 1.016 | 9.09E-01 | 9.09E+01 |  |  |
| 7989476 | AK096042    | FLJ38723  | hypothetical FLJ38723                | -0.036 | 0.976 | 7.82E-01 | 7.82E+01 |  |  |
| 7989489 | ---         | ---       | ---                                  | -0.052 | 0.965 | 8.47E-01 | 8.47E+01 |  |  |
| 7989491 | AB209041    | TPM1      | tropomyosin 1 (alpha)                | -0.014 | 0.990 | 9.42E-01 | 9.42E+01 |  |  |
| 7989493 | NM_015920   | RPS27L    | ribosomal protein S27-like           | -0.012 | 0.992 | 9.64E-01 | 9.64E+01 |  |  |
| 7989516 | NM_003922   | HERC1     | hect (homologous to the E6-AP (U     | 0.001  | 1.001 | 9.97E-01 | 9.97E+01 |  |  |
| 7989596 | NM_014326   | DAPK2     | death-associated protein kinase 2    | -0.037 | 0.975 | 7.68E-01 | 7.68E+01 |  |  |
| 7989611 | NM_032231   | FAM96A    | family with sequence similarity 96   | 0.262  | 1.199 | 6.73E-02 | 6.73E+00 |  |  |
| 7989617 | ---         | ---       | ---                                  | 0.056  | 1.040 | 8.55E-01 | 8.55E+01 |  |  |
| 7989619 | NM_000942   | PPIB      | peptidylprolyl isomerase B (cyclo    | 0.093  | 1.067 | 4.43E-01 | 4.43E+01 |  |  |
| 7989628 | NM_022048   | CSNK1G1   | casein kinase 1, gamma 1             | -0.002 | 0.998 | 9.90E-01 | 9.90E+01 |  |  |
| 7989659 | ---         | ---       | ---                                  | 0.170  | 1.125 | 6.60E-01 | 6.60E+01 |  |  |
| 7989661 | NM_002537   | OAZ2      | ornithine decarboxylase antizyme     | 0.100  | 1.072 | 5.84E-01 | 5.84E+01 |  |  |
| 7989670 | NM_194272   | RBPM52    | RNA binding protein with multiple    | 0.011  | 1.007 | 9.55E-01 | 9.55E+01 |  |  |
| 7989680 | NM_025049   | PIF1      | PIF1 5'-to-3' DNA helicase homolo    | 0.029  | 1.021 | 7.55E-01 | 7.55E+01 |  |  |
| 7989696 | NM_00112788 | SPG21     | spastic paraplegia 21 (autosomal r   | 0.255  | 1.193 | 1.95E-02 | 1.95E+00 |  |  |
| 7989718 | NM_016563   | RASL12    | RAS-like, family 12                  | -0.006 | 0.996 | 9.75E-01 | 9.75E+01 |  |  |
| 7989725 | NM_005707   | PDCD7     | programmed cell death 7              | -0.016 | 0.989 | 9.16E-01 | 9.16E+01 |  |  |
| 7989735 | NM_006660   | CLPX      | ClpX caseinolytic peptidase X hom    | 0.002  | 1.001 | 9.91E-01 | 9.91E+01 |  |  |
| 7989759 | NM_017851   | PARP16    | poly (ADP-ribose) polymerase fam     | 0.044  | 1.031 | 8.16E-01 | 8.16E+01 |  |  |
| 7989770 | NM_004884   | IGDCC3    | immunoglobulin superfamily, DCC      | 0.000  | 1.000 | 9.99E-01 | 9.99E+01 |  |  |
| 7989785 | NM_020962   | IGDCC4    | immunoglobulin superfamily, DCC      | -0.010 | 0.993 | 9.64E-01 | 9.64E+01 |  |  |
| 7989806 | NM_197960   | DPP8      | dipeptidyl-peptidase 8               | 0.083  | 1.059 | 5.43E-01 | 5.43E+01 |  |  |
| 7989834 | AK296134    | C15orf44  | chromosome 15 open reading fram      | -0.069 | 0.953 | 6.34E-01 | 6.34E+01 |  |  |
| 7989849 | NM_00114482 | DENND4A   | DENN/MADD domain containing 4        | 0.023  | 1.016 | 9.05E-01 | 9.05E+01 |  |  |
| 7989883 | ---         | ---       | ---                                  | 0.122  | 1.088 | 7.51E-01 | 7.51E+01 |  |  |
| 7989885 | NM_00103172 | DNAJB14   | DnaJ (Hsp40) homolog, subfamily      | 0.058  | 1.041 | 7.87E-01 | 7.87E+01 |  |  |
| 7989887 | NM_032445   | MEGF11    | multiple EGF-like-domains 11         | -0.029 | 0.980 | 7.91E-01 | 7.91E+01 |  |  |
| 7989924 | NM_006049   | SNAPC5    | small nuclear RNA activating comp    | 0.001  | 1.001 | 9.98E-01 | 9.98E+01 |  |  |
| 7989932 | AK125772    | RPL4      | ribosomal protein L4                 | 0.012  | 1.008 | 9.68E-01 | 9.68E+01 |  |  |
| 7989953 | NM_024666   | AAGAB     | alpha- and gamma-adaptin bindin      | -0.082 | 0.945 | 6.39E-01 | 6.39E+01 |  |  |
| 7989968 | NM_033429   | CALML4    | calmodulin-like 4                    | 0.159  | 1.117 | 2.69E-01 | 2.69E+01 |  |  |
| 7989975 | NM_017882   | CLN6      | ceroid-lipofuscinosis, neuronal 6, f | 0.137  | 1.100 | 1.65E-01 | 1.65E+01 |  |  |
| 7989985 | NM_00100443 | ITGA11    | integrin, alpha 11                   | -0.005 | 0.997 | 9.76E-01 | 9.76E+01 |  |  |
| 7990020 | NM_006305   | ANP32A    | acidic (leucine-rich) nuclear phosph | -0.003 | 0.998 | 9.85E-01 | 9.85E+01 |  |  |
| 7990027 | NR_026808   | C15orf28  | chromosome 15 open reading fram      | -0.089 | 0.940 | 7.38E-01 | 7.38E+01 |  |  |
| 7990029 | ---         | ---       | ---                                  | 0.012  | 1.009 | 9.75E-01 | 9.75E+01 |  |  |
| 7990033 | NM_005078   | TLE3      | transducin-like enhancer of split 3  | -0.087 | 0.941 | 3.35E-01 | 3.35E+01 |  |  |

|         |               |              |                                      |        |       |          |          |  |  |
|---------|---------------|--------------|--------------------------------------|--------|-------|----------|----------|--|--|
| 7990090 | ---           | ---          | ---                                  | -0.015 | 0.989 | 9.50E-01 | 9.50E+01 |  |  |
| 7990092 | NM_006901     | MYO9A        | myosin IXA                           | -0.068 | 0.954 | 6.11E-01 | 6.11E+01 |  |  |
| 7990151 | NM_182470     | PKM2         | pyruvate kinase, muscle              | -0.007 | 0.995 | 9.86E-01 | 9.86E+01 |  |  |
| 7990165 | NM_020214     | PARP6        | poly (ADP-ribose) polymerase fam     | 0.029  | 1.020 | 8.71E-01 | 8.71E+01 |  |  |
| 7990191 | NM_052840     | BRUNOL6      | bruno-like 6, RNA binding protein    | -0.060 | 0.959 | 4.25E-01 | 4.25E+01 |  |  |
| 7990211 | NM_000520     | HEXA         | hexosaminidase A (alpha polypept     | 0.088  | 1.063 | 4.91E-01 | 4.91E+01 |  |  |
| 7990231 | NR_023318     | ADPGK        | ADP-dependent glucokinase            | -0.010 | 0.993 | 9.77E-01 | 9.77E+01 |  |  |
| 7990244 | NM_005477     | HCN4         | hyperpolarization activated cyclic   | -0.012 | 0.991 | 9.36E-01 | 9.36E+01 |  |  |
| 7990253 | NM_012428     | NPTN         | neuroplastin                         | 0.035  | 1.025 | 8.68E-01 | 8.68E+01 |  |  |
| 7990269 | BC111368      | C15orf59     | chromosome 15 open reading frar      | -0.087 | 0.941 | 3.41E-01 | 3.41E+01 |  |  |
| 7990273 | NM_004809     | STOML1       | stomatin (EPB72)-like 1              | -0.023 | 0.984 | 8.97E-01 | 8.97E+01 |  |  |
| 7990283 | NM_00103864   | GOLGA6       | golgi autoantigen, golgin subfamili  | -0.037 | 0.975 | 6.37E-01 | 6.37E+01 |  |  |
| 7990309 | NM_022369     | STRA6        | stimulated by retinoic acid gene 6   | -0.065 | 0.956 | 6.05E-01 | 6.05E+01 |  |  |
| 7990345 | NM_003612     | SEMA7A       | semaphorin 7A, GPI membrane an       | -0.106 | 0.929 | 4.25E-01 | 4.25E+01 |  |  |
| 7990361 | NM_032907     | UBL7         | ubiquitin-like 7 (bone marrow stro   | 0.070  | 1.049 | 4.93E-01 | 4.93E+01 |  |  |
| 7990379 | NM_00114244   | EDC3         | enhancer of mRNA decapping 3 ho      | 0.099  | 1.071 | 4.70E-01 | 4.70E+01 |  |  |
| 7990400 | NM_00109943   | ULK3         | unc-51-like kinase 3 (C. elegans)    | 0.004  | 1.003 | 9.85E-01 | 9.85E+01 |  |  |
| 7990417 | NM_005697     | SCAMP2       | secretory carrier membrane prote     | 0.040  | 1.028 | 8.29E-01 | 8.29E+01 |  |  |
| 7990429 | NM_020447     | C15orf17     | chromosome 15 open reading frar      | 0.032  | 1.022 | 8.71E-01 | 8.71E+01 |  |  |
| 7990436 | NM_004255     | COX5A        | cytochrome c oxidase subunit Va      | 0.098  | 1.070 | 2.56E-01 | 2.56E+01 |  |  |
| 7990442 | NM_017793     | RPP25        | ribonuclease P/MRP 25kDa subun       | 0.031  | 1.022 | 8.02E-01 | 8.02E+01 |  |  |
| 7990452 | ---           | ---          | ---                                  | -0.042 | 0.972 | 8.05E-01 | 8.05E+01 |  |  |
| 7990457 | NM_006715     | MAN2C1       | mannosidase, alpha, class 2C, mer    | -0.048 | 0.967 | 6.54E-01 | 6.54E+01 |  |  |
| 7990487 | NM_015477     | SIN3A        | SIN3 homolog A, transcription reg    | -0.091 | 0.939 | 3.79E-01 | 3.79E+01 |  |  |
| 7990511 | NM_002833     | PTPN9        | protein tyrosine phosphatase, nor    | 0.087  | 1.062 | 6.27E-01 | 6.27E+01 |  |  |
| 7990528 | NM_005701     | SNUPN        | snurportin 1                         | 0.037  | 1.026 | 8.63E-01 | 8.63E+01 |  |  |
| 7990540 | NM_018285     | IMP3         | IMP3, U3 small nucleolar ribonuck    | -0.021 | 0.986 | 8.72E-01 | 8.72E+01 |  |  |
| 7990564 | ---           | ---          | ---                                  | -0.162 | 0.894 | 5.75E-01 | 5.75E+01 |  |  |
| 7990566 | NM_000126     | ETFA         | electron-transfer-flavoprotein, alp  | 0.041  | 1.029 | 8.29E-01 | 8.29E+01 |  |  |
| 7990582 | NM_020843     | SCAPER       | S-phase cyclin A-associated protei   | -0.007 | 0.995 | 9.74E-01 | 9.74E+01 |  |  |
| 7990618 | ---           | ---          | ---                                  | -0.046 | 0.969 | 6.89E-01 | 6.89E+01 |  |  |
| 7990620 | NM_005724     | TSPAN3       | tetraspanin 3                        | -0.026 | 0.982 | 9.15E-01 | 9.15E+01 |  |  |
| 7990632 | NM_024776     | SGK269       | NKF3 kinase family member            | 0.100  | 1.072 | 8.27E-01 | 8.27E+01 |  |  |
| 7990643 | NM_032808     | LINGO1       | leucine rich repeat and Ig domain    | 0.019  | 1.013 | 9.10E-01 | 9.10E+01 |  |  |
| 7990654 | ---           | ---          | ---                                  | 0.016  | 1.011 | 9.64E-01 | 9.64E+01 |  |  |
| 7990657 | NM_144572     | TBC1D2B      | TBC1 domain family, member 2B        | 0.018  | 1.013 | 9.60E-01 | 9.60E+01 |  |  |
| 7990700 | NM_025234     | WDR61        | WD repeat domain 61                  | 0.016  | 1.011 | 9.56E-01 | 9.56E+01 |  |  |
| 7990729 | NM_000750     | CHRNB4       | cholinergic receptor, nicotinic, bet | 0.093  | 1.067 | 4.61E-01 | 4.61E+01 |  |  |
| 7990736 | NM_014272     | ADAMTS7      | ADAM metalloproteinase with thro     | 0.015  | 1.010 | 9.30E-01 | 9.30E+01 |  |  |
| 7990757 | NM_004390     | CTSH         | cathepsin H                          | -0.129 | 0.914 | 7.08E-01 | 7.08E+01 |  |  |
| 7990810 | NM_006441     | MTHFS        | 5,10-methenyltetrahydrofolate sy     | -0.081 | 0.945 | 7.31E-01 | 7.31E+01 |  |  |
| 7990815 | NM_00110088   | ST20         | suppressor of tumorigenicity 20      | -0.070 | 0.953 | 8.14E-01 | 8.14E+01 |  |  |
| 7990818 | NM_00111473   | BCL2A1       | BCL2-related protein A1              | -0.120 | 0.920 | 6.69E-01 | 6.69E+01 |  |  |
| 7990825 | ---           | ---          | ---                                  | 0.003  | 1.002 | 9.88E-01 | 9.88E+01 |  |  |
| 7990827 | ENST000000447 | LOC100133746 | hypothetical LOC100133746            | -0.041 | 0.972 | 7.53E-01 | 7.53E+01 |  |  |
| 7990830 | NM_015154     | MESDC2       | mesoderm development candidat        | 0.052  | 1.037 | 6.75E-01 | 6.75E+01 |  |  |
| 7990839 | NM_181900     | STARD5       | StAR-related lipid transfer (START   | -0.174 | 0.886 | 2.83E-01 | 2.83E+01 |  |  |
| 7990873 | NM_032246     | MEX3B        | mex-3 homolog B (C. elegans)         | 0.029  | 1.020 | 8.23E-01 | 8.23E+01 |  |  |
| 7990879 | NM_024580     | EFTUD1       | elongation factor Tu GTP binding d   | -0.144 | 0.905 | 4.20E-01 | 4.20E+01 |  |  |
| 7990894 | NR_003246     | FLJ40113     | golgi autoantigen, golgin subfamili  | -0.069 | 0.953 | 5.24E-01 | 5.24E+01 |  |  |
| 7990898 | NM_000661     | RPL9         | ribosomal protein L9                 | 0.007  | 1.005 | 9.63E-01 | 9.63E+01 |  |  |
| 7990902 | NR_026811     | LOC80154     | hypothetical LOC80154                | -0.061 | 0.959 | 3.63E-01 | 3.63E+01 |  |  |
| 7990916 | NM_001021     | RPS17        | ribosomal protein S17                | -0.011 | 0.992 | 9.16E-01 | 9.16E+01 |  |  |
| 7990922 | NR_003246     | FLJ40113     | golgi autoantigen, golgin subfamili  | -0.121 | 0.919 | 2.54E-01 | 2.54E+01 |  |  |
| 7990928 | ENST000000342 | LOC440297    | chondroitin sulfate proteoglycan 4   | -0.052 | 0.964 | 4.03E-01 | 4.03E+01 |  |  |
| 7990943 | NR_003246     | FLJ40113     | golgi autoantigen, golgin subfamili  | -0.122 | 0.919 | 2.70E-01 | 2.70E+01 |  |  |
| 7990949 | NM_000661     | RPL9         | ribosomal protein L9                 | 0.005  | 1.004 | 9.75E-01 | 9.75E+01 |  |  |
| 7990952 | NR_026811     | LOC80154     | hypothetical LOC80154                | -0.053 | 0.964 | 4.06E-01 | 4.06E+01 |  |  |
| 7990965 | NM_001021     | RPS17        | ribosomal protein S17                | -0.011 | 0.992 | 9.16E-01 | 9.16E+01 |  |  |
| 7991017 | BC020234      | LOC283693    | actin, gamma pseudogene              | 0.016  | 1.011 | 9.47E-01 | 9.47E+01 |  |  |
| 7991034 | NM_199330     | HOMER2       | homer homolog 2 (Drosophila)         | -0.010 | 0.993 | 9.64E-01 | 9.64E+01 |  |  |
| 7991047 | AK097109      | LOC100131860 | hypothetical protein LOC1001318      | 0.128  | 1.092 | 7.73E-01 | 7.73E+01 |  |  |
| 7991049 | NM_144597     | C15orf40     | chromosome 15 open reading frar      | 0.003  | 1.002 | 9.90E-01 | 9.90E+01 |  |  |
| 7991057 | NM_025238     | BTBD1        | BTB (POZ) domain containing 1        | 0.147  | 1.107 | 1.36E-02 | 1.36E+00 |  |  |
| 7991070 | NM_016073     | HDGFRP3      | hepatoma-derived growth factor,      | -0.034 | 0.976 | 9.49E-01 | 9.49E+01 |  |  |
| 7991088 | NR_027001     | LOC388152    | hypothetical LOC388152               | -0.037 | 0.975 | 6.07E-01 | 6.07E+01 |  |  |
| 7991106 | AB067507      | KIAA1920     | KIAA1920 protein                     | -0.081 | 0.945 | 6.58E-01 | 6.58E+01 |  |  |
| 7991110 | NR_003246     | FLJ40113     | golgi autoantigen, golgin subfamili  | -0.115 | 0.923 | 2.53E-01 | 2.53E+01 |  |  |
| 7991120 | NR_003661     | FLJ43276     | similar to ubiquitin-conjugating en  | -0.124 | 0.917 | 2.41E-01 | 2.41E+01 |  |  |
| 7991126 | NM_032856     | WDR73        | WD repeat domain 73                  | -0.021 | 0.986 | 9.36E-01 | 9.36E+01 |  |  |
| 7991138 | NM_021077     | NMB          | neuromedin B                         | -0.067 | 0.955 | 6.38E-01 | 6.38E+01 |  |  |
| 7991143 | NM_014300     | SEC11A       | SEC11 homolog A (S. cerevisiae)      | 0.041  | 1.029 | 5.99E-01 | 5.99E+01 |  |  |
| 7991159 | NR_027001     | LOC388152    | hypothetical LOC388152               | -0.029 | 0.980 | 6.91E-01 | 6.91E+01 |  |  |
| 7991171 | ---           | ---          | ---                                  | -0.114 | 0.924 | 8.20E-01 | 8.20E+01 |  |  |
| 7991173 | NM_022480     | KLHL25       | kelch-like 25 (Drosophila)           | 0.006  | 1.004 | 9.73E-01 | 9.73E+01 |  |  |
| 7991209 | NM_022163     | MRPL46       | mitochondrial ribosomal protein L    | -0.019 | 0.987 | 9.45E-01 | 9.45E+01 |  |  |
| 7991214 | ---           | ---          | ---                                  | 0.301  | 1.232 | 5.34E-01 | 5.34E+01 |  |  |



|         |              |              |                                      |        |       |          |          |  |
|---------|--------------|--------------|--------------------------------------|--------|-------|----------|----------|--|
| 7991224 | NM_178232    | HAPLN3       | hyaluronan and proteoglycan link     | -0.081 | 0.945 | 6.51E-01 | 6.51E+01 |  |
| 7991234 | NM_005928    | MFGE8        | milk fat globule-EGF factor 8 prote  | 0.013  | 1.009 | 9.53E-01 | 9.53E+01 |  |
| 7991258 | NM_002693    | POLG         | polymerase (DNA directed), gamm      | -0.041 | 0.972 | 6.83E-01 | 6.83E+01 |  |
| 7991296 | NM_198525    | KIF7         | kinesin family member 7              | 0.026  | 1.018 | 8.59E-01 | 8.59E+01 |  |
| 7991313 | NM_002666    | PLIN1        | perilipin 1                          | -0.008 | 0.995 | 9.68E-01 | 9.68E+01 |  |
| 7991323 | NM_003847    | PEX11A       | peroxisomal biogenesis factor 11a    | 0.036  | 1.025 | 8.32E-01 | 8.32E+01 |  |
| 7991332 | NM_018670    | MESP1        | mesoderm posterior 1 homolog (n      | 0.014  | 1.010 | 9.07E-01 | 9.07E+01 |  |
| 7991335 | NM_001150    | ANPEP        | alanine (membrane) aminopeptidas     | -0.342 | 0.789 | 4.28E-01 | 4.28E+01 |  |
| 7991357 | NR_023361    | AP3S2        | adaptor-related protein complex 3    | 0.104  | 1.075 | 6.34E-01 | 6.34E+01 |  |
| 7991367 | NM_182616    | C15orf38     | chromosome 15 open reading fram      | -0.032 | 0.978 | 8.63E-01 | 8.63E+01 |  |
| 7991374 | NM_002168    | IDH2         | isocitrate dehydrogenase 2 (NADP     | 0.248  | 1.188 | 3.21E-02 | 3.21E+00 |  |
| 7991386 | NM_006384    | CIB1         | calcium and integrin binding 1 (cal  | -0.096 | 0.935 | 1.57E-01 | 1.57E+01 |  |
| 7991401 | NM_198527    | HDDC3        | HD domain containing 3               | 0.005  | 1.003 | 9.86E-01 | 9.86E+01 |  |
| 7991406 | NM_003981    | PRC1         | protein regulator of cytokinesis 1   | 0.100  | 1.072 | 5.75E-01 | 5.75E+01 |  |
| 7991427 | NM_018668    | VPS33B       | vacuolar protein sorting 33 homol    | 0.028  | 1.020 | 8.57E-01 | 8.57E+01 |  |
| 7991451 | ---          | ---          | ---                                  | 0.067  | 1.048 | 7.43E-01 | 7.43E+01 |  |
| 7991453 | NM_207446    | FAM174B      | family with sequence similarity 17   | -0.055 | 0.963 | 2.53E-01 | 2.53E+01 |  |
| 7991459 | NM_020211    | RGMA         | RGM domain family, member A          | -0.037 | 0.975 | 8.01E-01 | 8.01E+01 |  |
| 7991465 | ---          | ---          | ---                                  | -0.097 | 0.935 | 8.01E-01 | 8.01E+01 |  |
| 7991478 | NM_00110261  | LOC145814    | pyroglutamyl-peptidase 1-like        | -0.078 | 0.947 | 5.31E-01 | 5.31E+01 |  |
| 7991501 | ---          | ---          | ---                                  | 0.357  | 1.281 | 9.54E-02 | 9.54E+00 |  |
| 7991503 | NM_152449    | LYSMD4       | LysM, putative peptidoglycan-bind    | -0.002 | 0.998 | 9.91E-01 | 9.91E+01 |  |
| 7991512 | NR_003260    | C15orf51     | dynamins 1 pseudogene                | 0.016  | 1.011 | 9.44E-01 | 9.44E+01 |  |
| 7991516 | NM_139057    | ADAMTS17     | ADAM metalloproteinase with thro     | -0.016 | 0.989 | 9.24E-01 | 9.24E+01 |  |
| 7991540 | ---          | ---          | ---                                  | -0.048 | 0.967 | 8.32E-01 | 8.32E+01 |  |
| 7991546 | NM_178842    | LASS3        | LAG1 homolog, ceramide synthase      | 0.014  | 1.010 | 9.73E-01 | 9.73E+01 |  |
| 7991562 | ---          | ---          | ---                                  | 0.115  | 1.083 | 8.48E-01 | 8.48E+01 |  |
| 7991566 | NM_018148    | LINS1        | lines homolog 1 (Drosophila)         | 0.077  | 1.055 | 7.15E-01 | 7.15E+01 |  |
| 7991581 | NM_014918    | CHSY1        | chondroitin sulfate synthase 1       | 0.068  | 1.048 | 5.01E-01 | 5.01E+01 |  |
| 7991587 | NM_203472    | SELS         | selenoprotein S                      | 0.022  | 1.016 | 9.33E-01 | 9.33E+01 |  |
| 7991598 | BC067846     | SNRPA1       | small nuclear ribonucleoprotein p    | -0.023 | 0.984 | 9.49E-01 | 9.49E+01 |  |
| 7991630 | NM_078474    | TM2D3        | TM2 domain containing 3              | 0.013  | 1.009 | 9.44E-01 | 9.44E+01 |  |
| 7991640 | NM_152334    | TARSL2       | threonyl-tRNA synthetase-like 2      | 0.038  | 1.027 | 8.62E-01 | 8.62E+01 |  |
| 7991668 | 0            | 0            | 0                                    | -0.050 | 0.966 | 4.82E-01 | 4.82E+01 |  |
| 7991695 | NR_027407    | GOLGA8D      | golgi autoantigen, golgin subfamili  | -0.053 | 0.964 | 4.05E-01 | 4.05E+01 |  |
| 7991714 | 0            | 0            | 0                                    | -0.061 | 0.959 | 3.47E-01 | 3.47E+01 |  |
| 7991722 | NR_003246    | FLJ40113     | golgi autoantigen, golgin subfamili  | -0.137 | 0.909 | 1.65E-01 | 1.65E+01 |  |
| 7991731 | BC032901     | LOC100132169 | similar to hCG1742852                | -0.001 | 0.999 | 9.97E-01 | 9.97E+01 |  |
| 7991735 | NM_024571    | SNRNP25      | small nuclear ribonucleoprotein 25   | -0.017 | 0.988 | 9.63E-01 | 9.63E+01 |  |
| 7991742 | NM_002434    | MPG          | N-methylpurine-DNA glycosylase       | -0.019 | 0.987 | 8.55E-01 | 8.55E+01 |  |
| 7991758 | NM_00100393  | HBM          | hemoglobin, mu                       | -0.060 | 0.959 | 4.99E-01 | 4.99E+01 |  |
| 7991762 | NM_000558    | HBA1         | hemoglobin, alpha 1                  | 0.149  | 1.109 | 8.15E-01 | 8.15E+01 |  |
| 7991766 | NM_000558    | HBA1         | hemoglobin, alpha 1                  | 0.149  | 1.109 | 8.15E-01 | 8.15E+01 |  |
| 7991772 | NM_005331    | HBQ1         | hemoglobin, theta 1                  | -0.106 | 0.929 | 1.69E-01 | 1.69E+01 |  |
| 7991779 | NM_032039    | ITFG3        | integrin alpha FG-GAP repeat cont    | -0.076 | 0.949 | 1.79E-01 | 1.79E+01 |  |
| 7991800 | NM_001176    | ARHGDIG      | Rho GDP dissociation inhibitor (GD   | -0.036 | 0.976 | 7.89E-01 | 7.89E+01 |  |
| 7991809 | NM_001176    | ARHGDIG      | Rho GDP dissociation inhibitor (GD   | -0.036 | 0.976 | 8.04E-01 | 8.04E+01 |  |
| 7991815 | NM_006849    | PDIA2        | protein disulfide isomerase family   | -0.009 | 0.994 | 9.54E-01 | 9.54E+01 |  |
| 7991828 | ---          | ---          | ---                                  | 0.005  | 1.004 | 9.74E-01 | 9.74E+01 |  |
| 7991835 | ---          | ---          | ---                                  | -0.038 | 0.974 | 7.62E-01 | 7.62E+01 |  |
| 7991837 | NM_005009    | NME4         | non-metastatic cells 4, protein exp  | -0.099 | 0.934 | 1.90E-01 | 1.90E+01 |  |
| 7991846 | NM_020664    | DECR2        | 2,4-dienoyl CoA reductase 2, pero    | 0.016  | 1.011 | 9.05E-01 | 9.05E+01 |  |
| 7991860 | NM_014700    | RAB11FIP3    | RAB11 family interacting protein 3   | -0.051 | 0.965 | 5.15E-01 | 5.15E+01 |  |
| 7991877 | NM_005632    | SOLH         | small optic lobes homolog (Drosop    | 0.000  | 1.000 | 1.00E+00 | 1.00E+02 |  |
| 7991893 | BC016613     | C16orf11     | chromosome 16 open reading fram      | -0.051 | 0.965 | 6.30E-01 | 6.30E+01 |  |
| 7991898 | ENST00000409 | PIGQ         | phosphatidylinositol glycan ancho    | -0.020 | 0.986 | 9.09E-01 | 9.09E+01 |  |
| 7991904 | NM_004204    | PIGQ         | phosphatidylinositol glycan ancho    | 0.013  | 1.009 | 9.41E-01 | 9.41E+01 |  |
| 7991917 | NM_021168    | RAB40C       | RAB40C, member RAS oncogene fa       | -0.092 | 0.938 | 2.89E-01 | 2.89E+01 |  |
| 7991927 | NM_053284    | WFIKKN1      | WAP, follistatin/kazal, immunoglo    | 0.022  | 1.016 | 8.50E-01 | 8.50E+01 |  |
| 7991932 | BC001912     | C16orf14     | chromosome 16 open reading fram      | -0.001 | 0.999 | 9.97E-01 | 9.97E+01 |  |
| 7991939 | NM_145294    | WDR90        | WD repeat domain 90                  | -0.008 | 0.995 | 9.49E-01 | 9.49E+01 |  |
| 7991989 | NM_138769    | RHOT2        | ras homolog gene family, member      | -0.071 | 0.952 | 4.27E-01 | 4.27E+01 |  |
| 7992010 | NM_003961    | RHBDL1       | rhomboid, veinlet-like 1 (Drosophi   | 0.026  | 1.018 | 8.33E-01 | 8.33E+01 |  |
| 7992021 | NM_005861    | STUB1        | STIP1 homology and U-box contain     | -0.051 | 0.966 | 6.63E-01 | 6.63E+01 |  |
| 7992032 | ENST00000397 | FBXL16       | F-box and leucine-rich repeat prot   | -0.018 | 0.987 | 9.13E-01 | 9.13E+01 |  |
| 7992038 | NM_024042    | METRN        | meteorin, glial cell differentiation | -0.059 | 0.960 | 5.34E-01 | 5.34E+01 |  |
| 7992043 | BC001181     | FAM173A      | family with sequence similarity 17   | 0.011  | 1.008 | 9.49E-01 | 9.49E+01 |  |
| 7992049 | NM_207112    | HAGHL        | hydroxyacylglutathione hydrolase     | -0.039 | 0.973 | 5.91E-01 | 5.91E+01 |  |
| 7992067 | ---          | ---          | ---                                  | 0.038  | 1.027 | 8.04E-01 | 8.04E+01 |  |
| 7992092 | NM_022092    | CTHF18       | CTF18, chromosome transmission       | -0.004 | 0.997 | 9.78E-01 | 9.78E+01 |  |
| 7992121 | NM_00101363  | LOC388199    | hypothetical LOC388199               | -0.014 | 0.990 | 9.36E-01 | 9.36E+01 |  |
| 7992125 | NM_014587    | SOX8         | SRY (sex determining region Y)-box   | -0.079 | 0.946 | 5.03E-01 | 5.03E+01 |  |
| 7992131 | ---          | ---          | ---                                  | 0.011  | 1.008 | 9.63E-01 | 9.63E+01 |  |
| 7992136 | ---          | ---          | ---                                  | 0.020  | 1.014 | 9.02E-01 | 9.02E+01 |  |
| 7992140 | ---          | ---          | ---                                  | -0.030 | 0.980 | 8.05E-01 | 8.05E+01 |  |
| 7992145 | NM_001053    | SSTR5        | somatostatin receptor 5              | -0.064 | 0.957 | 6.51E-01 | 6.51E+01 |  |
| 7992147 | NM_021098    | CACNA1H      | calcium channel, voltage-depende     | -0.062 | 0.958 | 3.64E-01 | 3.64E+01 |  |

|         |                             |           |                                     |        |       |          |          |  |  |
|---------|-----------------------------|-----------|-------------------------------------|--------|-------|----------|----------|--|--|
| 7992181 | NM_003294                   | TPSAB1    | tryptase alpha/beta 1               | -0.050 | 0.966 | 5.98E-01 | 5.98E+01 |  |  |
| 7992191 | NM_012217                   | TPSD1     | tryptase delta 1                    | -0.005 | 0.997 | 9.84E-01 | 9.84E+01 |  |  |
| 7992197 | ---                         | ---       | ---                                 | 0.021  | 1.015 | 8.81E-01 | 8.81E+01 |  |  |
| 7992205 | NM_194259                   | UBE2I     | ubiquitin-conjugating enzyme E2I    | 0.027  | 1.019 | 8.52E-01 | 8.52E+01 |  |  |
| 7992219 | NM_003933                   | BAIAP3    | BAI1-associated protein 3           | -0.047 | 0.968 | 6.09E-01 | 6.09E+01 |  |  |
| 7992255 | NM_032520                   | GNPTG     | N-acetylglucosamine-1-phosphate     | 0.024  | 1.017 | 9.03E-01 | 9.03E+01 |  |  |
| 7992269 | ---                         | ---       | ---                                 | -0.066 | 0.955 | 5.72E-01 | 5.72E+01 |  |  |
| 7992271 | NM_016111                   | TELO2     | TEL2, telomere maintenance 2, ho    | -0.058 | 0.960 | 6.62E-01 | 6.62E+01 |  |  |
| 7992293 | NM_024600                   | TMEM204   | transmembrane protein 204           | 0.022  | 1.016 | 9.13E-01 | 9.13E+01 |  |  |
| 7992302 | NM_020825                   | CRAMP1L   | Crn, cramped-like (Drosophila)      | 0.030  | 1.021 | 6.10E-01 | 6.10E+01 |  |  |
| 7992337 | NM_144570                   | HN1L      | hematological and neurological ex   | -0.003 | 0.998 | 9.85E-01 | 9.85E+01 |  |  |
| 7992347 | NM_015133                   | MAPK8IP3  | mitogen-activated protein kinase 4  | -0.041 | 0.972 | 6.95E-01 | 6.95E+01 |  |  |
| 7992379 | NM_00101086                 | EME2      | essential meiotic endonuclease 1    | -0.026 | 0.982 | 8.48E-01 | 8.48E+01 |  |  |
| 7992388 | NM_012225                   | NUBP2     | nucleotide binding protein 2 (Min)  | -0.040 | 0.973 | 7.67E-01 | 7.67E+01 |  |  |
| 7992402 | NM_004548                   | NDUFB10   | NADH dehydrogenase (ubiquinone)     | -0.039 | 0.973 | 8.35E-01 | 8.35E+01 |  |  |
| 7992409 | NM_174903                   | RNF151    | ring finger protein 151             | 0.019  | 1.013 | 9.22E-01 | 9.22E+01 |  |  |
| 7992414 | NM_006453                   | TBL3      | transducin (beta)-like 3            | -0.074 | 0.950 | 4.71E-01 | 4.71E+01 |  |  |
| 7992439 | NM_005262                   | GFER      | growth factor, augmenter of liver   | -0.087 | 0.941 | 3.72E-01 | 3.72E+01 |  |  |
| 7992447 | NM_004209                   | SYNGR3    | synaptogyrin 3                      | -0.063 | 0.958 | 6.78E-01 | 6.78E+01 |  |  |
| 7992458 | ---                         | ---       | ---                                 | 0.035  | 1.024 | 8.47E-01 | 8.47E+01 |  |  |
| 7992460 | NM_00109945                 | NPW       | neuropeptide W                      | 0.026  | 1.018 | 8.70E-01 | 8.70E+01 |  |  |
| 7992463 | NM_00113001                 | SLC9A3R2  | solute carrier family 9 (sodium/hy  | -0.024 | 0.983 | 8.16E-01 | 8.16E+01 |  |  |
| 7992474 | NM_000548                   | TSC2      | tuberous sclerosis 2                | -0.001 | 0.999 | 9.94E-01 | 9.94E+01 |  |  |
| 7992518 | NM_014353                   | RAB26     | RAB26, member RAS oncogene fam      | -0.039 | 0.973 | 7.36E-01 | 7.36E+01 |  |  |
| 7992529 | NM_032271                   | TRAF7     | TNF receptor-associated factor 7    | -0.016 | 0.989 | 9.16E-01 | 9.16E+01 |  |  |
| 7992552 | NM_022372                   | MLST8     | MTOR associated protein, LST8 ho    | 0.013  | 1.009 | 9.15E-01 | 9.15E+01 |  |  |
| 7992568 | NM_004424                   | E4F1      | E4F transcription factor 1          | 0.016  | 1.011 | 9.20E-01 | 9.20E+01 |  |  |
| 7992584 | NM_001374                   | DNASE1L2  | deoxyribonuclease I-like 2          | -0.135 | 0.911 | 9.60E-02 | 9.60E+00 |  |  |
| 7992594 | NM_001761                   | CCNF      | cyclin F                            | -0.009 | 0.994 | 9.58E-01 | 9.58E+01 |  |  |
| 7992614 | NM_025108                   | C16orf59  | chromosome 16 open reading fran     | -0.028 | 0.981 | 7.91E-01 | 7.91E+01 |  |  |
| 7992632 | NM_006181                   | NTN3      | netrin 3                            | -0.025 | 0.983 | 8.54E-01 | 8.54E+01 |  |  |
| 7992639 | NM_020705                   | TBC1D24   | TBC1 domain family, member 24       | 0.055  | 1.039 | 6.51E-01 | 6.51E+01 |  |  |
| 7992646 | NM_001694                   | ATP6V0C   | ATPase, H+ transporting, lysosoma   | 0.158  | 1.115 | 3.62E-01 | 3.62E+01 |  |  |
| 7992656 | NM_015944                   | AMDH2     | amidohydrolase domain containin     | 0.051  | 1.036 | 6.31E-01 | 6.31E+01 |  |  |
| 7992670 | NM_002613                   | PDPK1     | 3-phosphoinositide dependent pr     | 0.014  | 1.010 | 9.36E-01 | 9.36E+01 |  |  |
| 7992678 | NR_015441                   | PRO0461   | hypothetical LOC652276              | 0.039  | 1.028 | 8.17E-01 | 8.17E+01 |  |  |
| 7992682 | AK293900                    | PDPK1     | 3-phosphoinositide dependent pr     | 0.159  | 1.116 | 1.37E-01 | 1.37E+01 |  |  |
| 7992685 | NM_018992                   | KCTD5     | potassium channel tetramerisatio    | 0.037  | 1.026 | 8.44E-01 | 8.44E+01 |  |  |
| 7992692 | NM_016333                   | SRRM2     | serine/arginine repetitive matrix 2 | -0.019 | 0.987 | 8.64E-01 | 8.64E+01 |  |  |
| 7992716 | NM_00113508                 | TESSP1    | testis serine protease 1            | -0.100 | 0.933 | 2.69E-01 | 2.69E+01 |  |  |
| 7992722 | NM_006799                   | PRSS21    | protease, serine, 21 (testisin)     | -0.028 | 0.981 | 8.04E-01 | 8.04E+01 |  |  |
| 7992732 | NM_145252                   | ZG16B     | zymogen granule protein 16 hom      | -0.073 | 0.951 | 4.13E-01 | 4.13E+01 |  |  |
| 7992737 | NM_138439                   | FLYWCH2   | FLYWCH family member 2              | -0.114 | 0.924 | 1.55E-01 | 1.55E+01 |  |  |
| 7992744 | NM_032296                   | FLYWCH1   | FLYWCH-type zinc finger 1           | -0.032 | 0.978 | 7.97E-01 | 7.97E+01 |  |  |
| 7992758 | NM_172229                   | KREMEN2   | kringle containing transmembrane    | -0.088 | 0.941 | 2.14E-01 | 2.14E+01 |  |  |
| 7992775 | NM_152341                   | PAQR4     | progesterin and adipoQ receptor fa  | -0.019 | 0.987 | 8.68E-01 | 8.68E+01 |  |  |
| 7992782 | NM_020982                   | CLDN9     | claudin 9                           | 0.023  | 1.016 | 9.09E-01 | 9.09E+01 |  |  |
| 7992789 | NM_016639                   | TNFRSF12A | tumor necrosis factor receptor sup  | -0.059 | 0.960 | 5.40E-01 | 5.40E+01 |  |  |
| 7992795 | NM_024339                   | THOC6     | THO complex 6 homolog (Drosoph      | 0.013  | 1.009 | 9.49E-01 | 9.49E+01 |  |  |
| 7992811 | NM_022468                   | MMP25     | matrix metalloproteinase 25         | -0.012 | 0.992 | 9.49E-01 | 9.49E+01 |  |  |
| 7992828 | NM_00101263                 | IL32      | interleukin 32                      | -0.020 | 0.986 | 9.53E-01 | 9.53E+01 |  |  |
| 7992841 | ---                         | ---       | ---                                 | 0.108  | 1.078 | 6.04E-01 | 6.04E+01 |  |  |
| 7992843 | ---                         | ---       | ---                                 | -0.002 | 0.999 | 9.95E-01 | 9.95E+01 |  |  |
| 7992845 | NM_003456                   | ZNF205    | zinc finger protein 205             | 0.020  | 1.014 | 8.67E-01 | 8.67E+01 |  |  |
| 7992854 | NM_004220                   | ZNF213    | zinc finger protein 213             | -0.031 | 0.979 | 7.91E-01 | 7.91E+01 |  |  |
| 7992863 | NM_012360                   | OR1F1     | olfactory receptor, family 1, subfa | -0.052 | 0.965 | 6.66E-01 | 6.66E+01 |  |  |
| 7992865 | NR_002169 // R1F2P // OR1F2 | OR1F2     | olfactory receptor, family 1, subfa | -0.213 | 0.863 | 3.00E-01 | 3.00E+01 |  |  |
| 7992867 | AK096958                    | FLJ39639  | hypothetical protein FLJ39639       | -0.086 | 0.942 | 5.99E-01 | 5.99E+01 |  |  |
| 7992870 | NM_005741                   | ZNF263    | zinc finger protein 263             | -0.074 | 0.950 | 4.59E-01 | 4.59E+01 |  |  |
| 7992877 | NM_153028                   | ZNF75A    | zinc finger protein 75a             | 0.009  | 1.006 | 9.80E-01 | 9.80E+01 |  |  |
| 7992887 | AK093979                    | ZNF75A    | zinc finger protein 75a             | 0.110  | 1.080 | 4.96E-01 | 4.96E+01 |  |  |
| 7992889 | NM_012368                   | OR2C1     | olfactory receptor, family 2, subfa | 0.009  | 1.006 | 9.64E-01 | 9.64E+01 |  |  |
| 7992893 | ---                         | ---       | ---                                 | 0.146  | 1.107 | 7.35E-01 | 7.35E+01 |  |  |
| 7992895 | NM_017810                   | ZNF434    | zinc finger protein 434             | 0.021  | 1.015 | 9.33E-01 | 9.33E+01 |  |  |
| 7992897 | NM_003450                   | ZNF174    | zinc finger protein 174             | -0.095 | 0.936 | 5.55E-01 | 5.55E+01 |  |  |
| 7992905 | NM_00108360                 | NAT15     | N-acetyltransferase 15 (GCN5-rela   | -0.034 | 0.976 | 7.98E-01 | 7.98E+01 |  |  |
| 7992917 | NM_015041                   | CLUAP1    | clusterin associated protein 1      | -0.078 | 0.948 | 7.47E-01 | 7.47E+01 |  |  |
| 7992934 | NM_005223                   | DNASE1    | deoxyribonuclease I                 | -0.005 | 0.996 | 9.79E-01 | 9.79E+01 |  |  |
| 7992954 | ---                         | ---       | ---                                 | -0.015 | 0.990 | 9.39E-01 | 9.39E+01 |  |  |
| 7992956 | NM_032575                   | GLIS2     | GLIS family zinc finger 2           | -0.017 | 0.988 | 9.07E-01 | 9.07E+01 |  |  |
| 7992967 | NM_138440                   | VASN      | vasorin                             | 0.003  | 1.002 | 9.88E-01 | 9.88E+01 |  |  |
| 7992973 | NM_005147                   | DNAJA3    | DnaJ (Hsp40) homolog, subfamily     | 0.048  | 1.034 | 7.30E-01 | 7.30E+01 |  |  |
| 7992987 | NM_00112720                 | HMOX2     | heme oxygenase (decycling) 2        | 0.062  | 1.044 | 6.80E-01 | 6.80E+01 |  |  |
| 7992996 | AY358225                    | UNQ3118   | GRTR3118                            | 0.190  | 1.141 | 3.91E-01 | 3.91E+01 |  |  |
| 7992998 | NM_00114229                 | MGRN1     | mahogunin, ring finger 1            | 0.058  | 1.041 | 4.23E-01 | 4.23E+01 |  |  |
| 7993017 | ---                         | ---       | ---                                 | -0.010 | 0.993 | 9.74E-01 | 9.74E+01 |  |  |
| 7993019 | NM_032349                   | NUDT16L1  | nudix (nucleoside diphosphate lin   | 0.006  | 1.004 | 9.67E-01 | 9.67E+01 |  |  |

|         |              |              |                                              |        |       |          |          |  |  |
|---------|--------------|--------------|----------------------------------------------|--------|-------|----------|----------|--|--|
| 7993024 | NM_139170    | C16orf71     | chromosome 16 open reading frame             | -0.022 | 0.985 | 8.62E-01 | 8.62E+01 |  |  |
| 7993035 | NM_016936    | UBN1         | ubiquitin 1                                  | -0.086 | 0.942 | 4.07E-01 | 4.07E+01 |  |  |
| 7993054 | NM_014692    | SEC14L5      | SEC14-like 5 (S. cerevisiae)                 | -0.010 | 0.993 | 9.50E-01 | 9.50E+01 |  |  |
| 7993071 | NM_019109    | ALG1         | asparagine-linked glycosylation 1,           | 0.100  | 1.072 | 4.27E-01 | 4.27E+01 |  |  |
| 7993108 | AK094332     | LOC440337    | hypothetical LOC440337                       | -0.042 | 0.972 | 7.40E-01 | 7.40E+01 |  |  |
| 7993114 | NM_024109    | C16orf68     | chromosome 16 open reading frame             | -0.077 | 0.948 | 5.52E-01 | 5.52E+01 |  |  |
| 7993126 | NM_020686    | ABAT         | 4-aminobutyrate aminotransferase             | -0.018 | 0.988 | 9.35E-01 | 9.35E+01 |  |  |
| 7993148 | NM_000303    | PMM2         | phosphomannomutase 2                         | 0.127  | 1.092 | 3.27E-01 | 3.27E+01 |  |  |
| 7993159 | NM_014117    | C16orf72     | chromosome 16 open reading frame             | -0.087 | 0.942 | 2.31E-01 | 2.31E+01 |  |  |
| 7993165 | ---          | ---          | ---                                          | -0.003 | 0.998 | 9.88E-01 | 9.88E+01 |  |  |
| 7993167 | NM_024997    | ATF7IP2      | activating transcription factor 7 interactor | 0.206  | 1.153 | 3.42E-01 | 3.42E+01 |  |  |
| 7993185 | NM_002484    | NUBP1        | nucleotide binding protein 1 (Min)           | 0.147  | 1.107 | 3.85E-01 | 3.85E+01 |  |  |
| 7993195 | NM_000246    | CIITA        | class II, major histocompatibility complex   | 0.198  | 1.147 | 9.72E-03 | 9.72E-01 |  |  |
| 7993223 | NM_015226    | CLEC16A      | C-type lectin domain family 16, member A     | 0.079  | 1.056 | 2.56E-01 | 2.56E+01 |  |  |
| 7993248 | NM_152308    | C16orf75     | chromosome 16 open reading frame             | -0.016 | 0.989 | 9.19E-01 | 9.19E+01 |  |  |
| 7993259 | NM_003498    | SNN          | stannin                                      | 0.069  | 1.049 | 4.43E-01 | 4.43E+01 |  |  |
| 7993265 | NM_015914    | TXNDC11      | thioredoxin domain containing 11             | -0.036 | 0.975 | 8.78E-01 | 8.78E+01 |  |  |
| 7993274 | NM_032167    | RUNDC2A      | RUN domain containing 2A                     | 0.109  | 1.079 | 4.67E-01 | 4.67E+01 |  |  |
| 7993281 | NM_00108053  | SNX29        | sorting nexin 29                             | 0.145  | 1.106 | 1.76E-01 | 1.76E+01 |  |  |
| 7993296 | NM_00114520  | LOC729993    | hypothetical protein LOC729993               | 0.019  | 1.013 | 9.13E-01 | 9.13E+01 |  |  |
| 7993310 | NM_014048    | MKL2         | MKL/myocardin-like 2                         | 0.073  | 1.052 | 4.00E-01 | 4.00E+01 |  |  |
| 7993339 | ENST00000391 | LOC100129038 | PRO2812                                      | 0.169  | 1.124 | 3.02E-01 | 3.02E+01 |  |  |
| 7993341 | NM_016561    | BFAR         | bifunctional apoptosis regulator             | -0.005 | 0.997 | 9.84E-01 | 9.84E+01 |  |  |
| 7993349 | NM_006985    | NP1P         | nuclear pore complex interacting protein     | -0.021 | 0.985 | 8.71E-01 | 8.71E+01 |  |  |
| 7993359 | NM_006985    | NP1P         | nuclear pore complex interacting protein     | -0.021 | 0.985 | 8.70E-01 | 8.70E+01 |  |  |
| 7993369 | ---          | ---          | ---                                          | -0.023 | 0.984 | 8.95E-01 | 8.95E+01 |  |  |
| 7993371 | NM_00100406  | NOMO3        | NODAL modulator 3                            | 0.000  | 1.000 | 1.00E+00 | 1.00E+02 |  |  |
| 7993404 | NM_006985    | NP1P         | nuclear pore complex interacting protein     | -0.026 | 0.982 | 7.78E-01 | 7.78E+01 |  |  |
| 7993433 | NM_015027    | PDXDC1       | pyridoxal-dependent decarboxylase            | 0.088  | 1.063 | 3.95E-01 | 3.95E+01 |  |  |
| 7993451 | ---          | ---          | ---                                          | 0.023  | 1.016 | 9.74E-01 | 9.74E+01 |  |  |
| 7993458 | NM_033201    | C16orf45     | chromosome 16 open reading frame             | -0.018 | 0.988 | 9.50E-01 | 9.50E+01 |  |  |
| 7993467 | NM_00114397  | NDE1         | nucleolar distribution gene E homolog        | -0.076 | 0.949 | 6.66E-01 | 6.66E+01 |  |  |
| 7993478 | NM_004996    | ABCC1        | ATP-binding cassette, sub-family C           | 0.117  | 1.084 | 2.84E-01 | 2.84E+01 |  |  |
| 7993511 | NM_00100406  | NOMO3        | NODAL modulator 3                            | 0.000  | 1.000 | 1.00E+00 | 1.00E+02 |  |  |
| 7993546 | NM_006985    | NP1P         | nuclear pore complex interacting protein     | -0.028 | 0.980 | 7.44E-01 | 7.44E+01 |  |  |
| 7993580 | NM_006985    | NP1P         | nuclear pore complex interacting protein     | -0.028 | 0.981 | 7.43E-01 | 7.43E+01 |  |  |
| 7993586 | ---          | ---          | ---                                          | 0.023  | 1.016 | 9.74E-01 | 9.74E+01 |  |  |
| 7993606 | ---          | ---          | ---                                          | 0.122  | 1.088 | 4.98E-01 | 4.98E+01 |  |  |
| 7993608 | NM_016138    | COQ7         | coenzyme Q7 homolog, ubiquinol               | 0.042  | 1.030 | 8.33E-01 | 8.33E+01 |  |  |
| 7993624 | NM_016524    | SYT17        | synaptotagmin XVII                           | 0.128  | 1.093 | 2.79E-01 | 2.79E+01 |  |  |
| 7993680 | BC050464     | C16orf62     | chromosome 16 open reading frame             | 0.045  | 1.032 | 8.26E-01 | 8.26E+01 |  |  |
| 7993726 | NM_017888    | ACSM5        | acyl-CoA synthetase medium-chain             | -0.030 | 0.979 | 8.53E-01 | 8.53E+01 |  |  |
| 7993774 | ---          | ---          | ---                                          | 0.219  | 1.164 | 3.35E-01 | 3.35E+01 |  |  |
| 7993800 | NM_00112830  | LYRM1        | LYR motif containing 1                       | -0.003 | 0.998 | 9.92E-01 | 9.92E+01 |  |  |
| 7993807 | NM_020422    | TMEM159      | transmembrane protein 159                    | -0.081 | 0.946 | 6.51E-01 | 6.51E+01 |  |  |
| 7993825 | NM_00101239  | RUNDC2B      | RUN domain containing 2B                     | 0.064  | 1.046 | 8.41E-01 | 8.41E+01 |  |  |
| 7993846 | ---          | ---          | ---                                          | -0.222 | 0.857 | 1.63E-01 | 1.63E+01 |  |  |
| 7993848 | NM_144672    | OTOA         | otoancorin                                   | -0.008 | 0.994 | 9.65E-01 | 9.65E+01 |  |  |
| 7993872 | NM_003366    | UQCRC2       | ubiquinol-cytochrome c reductase             | 0.012  | 1.008 | 9.63E-01 | 9.63E+01 |  |  |
| 7993935 | ---          | ---          | ---                                          | -0.025 | 0.983 | 8.96E-01 | 8.96E+01 |  |  |
| 7993946 | NM_013302    | EEF2K        | eukaryotic elongation factor-2 kinase        | 0.121  | 1.087 | 2.69E-01 | 2.69E+01 |  |  |
| 7993973 | NM_018119    | POLR3E       | polymerase (RNA) III (DNA directed)          | -0.050 | 0.966 | 6.42E-01 | 6.42E+01 |  |  |
| 7993999 | NM_015092    | SMG1         | SMG1 homolog, phosphatidylinositol           | 0.041  | 1.029 | 7.16E-01 | 7.16E+01 |  |  |
| 7994006 | NM_015092    | SMG1         | SMG1 homolog, phosphatidylinositol           | -0.009 | 0.994 | 9.51E-01 | 9.51E+01 |  |  |
| 7994026 | NM_130464    | NPIPL3       | nuclear pore complex interacting protein     | 0.011  | 1.008 | 9.24E-01 | 9.24E+01 |  |  |
| 7994052 | NM_006043    | HS3ST2       | heparan sulfate (glucosamine) 3-C            | -0.113 | 0.924 | 2.28E-01 | 2.28E+01 |  |  |
| 7994074 | NM_000336    | SCNN1B       | sodium channel, nonvoltage-gated             | 0.019  | 1.013 | 8.98E-01 | 8.98E+01 |  |  |
| 7994095 | NM_019116    | UBFD1        | ubiquitin family domain containing           | -0.027 | 0.982 | 9.07E-01 | 9.07E+01 |  |  |
| 7994102 | NM_032486    | DCTN5        | dynactin 5 (p25)                             | 0.008  | 1.005 | 9.77E-01 | 9.77E+01 |  |  |
| 7994109 | NM_005030    | PLK1         | polo-like kinase 1 (Drosophila)              | 0.034  | 1.024 | 8.78E-01 | 8.78E+01 |  |  |
| 7994161 | NM_006910    | RBBP6        | retinoblastoma binding protein 6             | -0.002 | 0.998 | 9.88E-01 | 9.88E+01 |  |  |
| 7994187 | NM_014494    | TNRC6A       | trinucleotide repeat containing 6A           | 0.044  | 1.031 | 7.59E-01 | 7.59E+01 |  |  |
| 7994216 | NM_052944    | SLC5A11      | solute carrier family 5 (sodium/glucose)     | 0.013  | 1.009 | 9.30E-01 | 9.30E+01 |  |  |
| 7994235 | ENST00000426 | LOC554206    | hypothetical LOC554206                       | -0.046 | 0.968 | 8.10E-01 | 8.10E+01 |  |  |
| 7994237 | NM_016309    | LCMT1        | leucine carboxyl methyltransferase           | 0.025  | 1.018 | 9.00E-01 | 9.00E+01 |  |  |
| 7994252 | NM_001169    | AQP8         | aquaporin 8                                  | -0.032 | 0.978 | 8.06E-01 | 8.06E+01 |  |  |
| 7994260 | NM_006040    | HS3ST4       | heparan sulfate (glucosamine) 3-C            | -0.027 | 0.981 | 8.38E-01 | 8.38E+01 |  |  |
| 7994265 | ---          | ---          | ---                                          | -0.082 | 0.945 | 8.36E-01 | 8.36E+01 |  |  |
| 7994267 | NM_00114554  | C16orf82     | chromosome 16 open reading frame             | -0.050 | 0.966 | 5.77E-01 | 5.77E+01 |  |  |
| 7994269 | NM_024773    | JMJD5        | jumonji domain containing 5                  | 0.041  | 1.029 | 8.05E-01 | 8.05E+01 |  |  |
| 7994280 | NM_000418    | IL4R         | interleukin 4 receptor                       | -0.002 | 0.999 | 9.93E-01 | 9.93E+01 |  |  |
| 7994292 | NM_181078    | IL21R        | interleukin 21 receptor                      | -0.016 | 0.989 | 9.26E-01 | 9.26E+01 |  |  |
| 7994308 | NM_015202    | KIAA0556     | KIAA0556                                     | 0.007  | 1.005 | 9.74E-01 | 9.74E+01 |  |  |
| 7994341 | ---          | ---          | ---                                          | 0.022  | 1.015 | 9.74E-01 | 9.74E+01 |  |  |
| 7994343 | ---          | ---          | ---                                          | 0.091  | 1.065 | 8.23E-01 | 8.23E+01 |  |  |
| 7994345 | NM_00102440  | SBK1         | SH3-binding domain kinase 1                  | -0.023 | 0.984 | 8.79E-01 | 8.79E+01 |  |  |
| 7994350 | ---          | ---          | ---                                          | -0.062 | 0.958 | 4.70E-01 | 4.70E+01 |  |  |

|         |              |          |                                      |        |       |          |          |  |  |
|---------|--------------|----------|--------------------------------------|--------|-------|----------|----------|--|--|
| 7994353 | NM_018690    | APOB48R  | apolipoprotein B48 receptor          | -0.033 | 0.977 | 9.20E-01 | 9.20E+01 |  |  |
| 7994362 | NM_138414    | CCDC101  | coiled-coil domain containing 101    | 0.011  | 1.007 | 9.67E-01 | 9.67E+01 |  |  |
| 7994371 | ENST00000446 | NPIPL3   | nuclear pore complex interacting     | -0.004 | 0.997 | 9.75E-01 | 9.75E+01 |  |  |
| 7994386 | NM_007245    | ATXN2L   | ataxin 2-like                        | -0.042 | 0.972 | 7.02E-01 | 7.02E+01 |  |  |
| 7994415 | NM_00103780  | EIF3C    | eukaryotic translation initiation fa | -0.004 | 0.997 | 9.86E-01 | 9.86E+01 |  |  |
| 7994445 | NM_015503    | SH2B1    | SH2B adaptor protein 1               | 0.006  | 1.004 | 9.84E-01 | 9.84E+01 |  |  |
| 7994487 | NM_001770    | CD19     | CD19 molecule                        | 0.025  | 1.017 | 9.02E-01 | 9.02E+01 |  |  |
| 7994506 | NM_032815    | NFATC2IP | nuclear factor of activated T-cells, | -0.079 | 0.947 | 4.83E-01 | 4.83E+01 |  |  |
| 7994518 | NM_032038    | SPNS1    | spinster homolog 1 (Drosophila)      | 0.014  | 1.010 | 9.33E-01 | 9.33E+01 |  |  |
| 7994535 | NM_014387    | LAT      | linker for activation of T cells     | -0.011 | 0.992 | 9.63E-01 | 9.63E+01 |  |  |
| 7994541 | NM_014387    | LAT      | linker for activation of T cells     | -0.090 | 0.940 | 4.94E-01 | 4.94E+01 |  |  |
| 7994559 | NR_003610    | PDXDC2   | pyridoxal-dependent decarboxylas     | -0.003 | 0.998 | 9.83E-01 | 9.83E+01 |  |  |
| 7994565 | NM_018427    | RRN3     | RRN3 RNA polymerase I transcript     | 0.124  | 1.090 | 4.10E-01 | 4.10E+01 |  |  |
| 7994570 | ---          | ---      | ---                                  | -0.093 | 0.938 | 7.15E-01 | 7.15E+01 |  |  |
| 7994572 | NR_002939    | RUND2C2  | RUN domain containing 2C             | -0.120 | 0.920 | 6.00E-01 | 6.00E+01 |  |  |
| 7994576 | NR_002939    | RUND2C2  | RUN domain containing 2C             | 0.078  | 1.055 | 7.72E-01 | 7.72E+01 |  |  |
| 7994582 | NM_003166    | SULT1A3  | sulfotransferase family, cytosolic,  | -0.033 | 0.978 | 7.94E-01 | 7.94E+01 |  |  |
| 7994603 | NM_00103028  | SPN      | sialophorin                          | 0.026  | 1.018 | 8.67E-01 | 8.67E+01 |  |  |
| 7994609 | NM_014298    | QPR1     | quinolinate phosphoribosyltransfe    | -0.063 | 0.957 | 5.09E-01 | 5.09E+01 |  |  |
| 7994615 | NM_152338    | ZG16     | zymogen granule protein 16 hom       | 0.006  | 1.004 | 9.71E-01 | 9.71E+01 |  |  |
| 7994620 | NM_007317    | KIF22    | kinesin family member 22             | 0.013  | 1.009 | 9.44E-01 | 9.44E+01 |  |  |
| 7994637 | NM_00104253  | MAZ      | MVC-associated zinc finger protei    | -0.088 | 0.941 | 3.41E-01 | 3.41E+01 |  |  |
| 7994647 | NM_145239    | PRRT2    | proline-rich transmembrane prote     | -0.012 | 0.992 | 9.49E-01 | 9.49E+01 |  |  |
| 7994655 | NM_024516    | C16orf53 | chromosome 16 open reading fram      | -0.015 | 0.990 | 9.36E-01 | 9.36E+01 |  |  |
| 7994659 | NM_017458    | MVP      | major vault protein                  | 0.030  | 1.021 | 8.64E-01 | 8.64E+01 |  |  |
| 7994675 | NM_181718    | ASPHD1   | aspartate beta-hydroxylase domai     | 0.035  | 1.025 | 7.89E-01 | 7.89E+01 |  |  |
| 7994683 | NM_00108361  | TMEM219  | transmembrane protein 219            | 0.037  | 1.026 | 8.62E-01 | 8.62E+01 |  |  |
| 7994692 | NM_016151    | TAOK2    | TAO kinase 2                         | -0.057 | 0.962 | 5.60E-01 | 5.60E+01 |  |  |
| 7994715 | NM_173618    | INO80E   | INO80 complex subunit E              | -0.040 | 0.973 | 7.82E-01 | 7.82E+01 |  |  |
| 7994737 | NM_000034    | ALDOA    | aldolase A, fructose-bisphosphate    | 0.001  | 1.001 | 9.98E-01 | 9.98E+01 |  |  |
| 7994756 | NM_002720    | PPP4C    | protein phosphatase 4 (formerly X    | -0.048 | 0.967 | 7.11E-01 | 7.11E+01 |  |  |
| 7994769 | NM_007074    | CORO1A   | coronin, actin binding protein, 1A   | -0.039 | 0.973 | 8.00E-01 | 8.00E+01 |  |  |
| 7994781 | NM_003166    | SULT1A3  | sulfotransferase family, cytosolic,  | -0.037 | 0.974 | 7.48E-01 | 7.48E+01 |  |  |
| 7994804 | NM_013292    | MYLPF    | myosin light chain, phosphorylate    | -0.042 | 0.971 | 6.66E-01 | 6.66E+01 |  |  |
| 7994817 | NM_016643    | ZNF771   | zinc finger protein 771              | -0.130 | 0.914 | 1.90E-01 | 1.90E+01 |  |  |
| 7994826 | NM_002209    | ITGAL    | integrin, alpha L (antigen CD11A)    | 0.002  | 1.001 | 9.94E-01 | 9.94E+01 |  |  |
| 7994858 | NM_024031    | PRR14    | proline rich 14                      | -0.079 | 0.947 | 1.65E-01 | 1.65E+01 |  |  |
| 7994874 | NM_00110507  | FBR1     | fibrosin                             | -0.063 | 0.957 | 5.73E-01 | 5.73E+01 |  |  |
| 7994889 | NM_006662    | SRAP     | Snf2-related CREBBP activator pro    | -0.056 | 0.962 | 5.39E-01 | 5.39E+01 |  |  |
| 7994926 | NR_002966    | SNORA30  | small nucleolar RNA, H/ACA box 3     | -0.075 | 0.949 | 8.24E-01 | 8.24E+01 |  |  |
| 7994928 | NM_000294    | PHKG2    | phosphorylase kinase, gamma 2 (t     | -0.014 | 0.990 | 9.55E-01 | 9.55E+01 |  |  |
| 7994939 | NM_014771    | RNF40    | ring finger protein 40               | -0.046 | 0.969 | 7.97E-01 | 7.97E+01 |  |  |
| 7994961 | NM_001330    | CTF1     | cardiotrophin 1                      | 0.038  | 1.027 | 7.07E-01 | 7.07E+01 |  |  |
| 7994967 | NM_00109978  | FBXL19   | F-box and leucine-rich repeat prot   | 0.002  | 1.001 | 9.89E-01 | 9.89E+01 |  |  |
| 7994981 | NM_152288    | Orai3    | Orai calcium release-activated cal   | -0.023 | 0.984 | 8.45E-01 | 8.45E+01 |  |  |
| 7994985 | NM_014712    | SETD1A   | SET domain containing 1A             | 0.002  | 1.001 | 9.89E-01 | 9.89E+01 |  |  |
| 7995007 | NM_025193    | HSD3B7   | hydroxy-delta-5-steroid dehydrog     | 0.039  | 1.028 | 7.14E-01 | 7.14E+01 |  |  |
| 7995017 | NM_004604    | STX4     | syntaxin 4                           | 0.114  | 1.082 | 5.06E-01 | 5.06E+01 |  |  |
| 7995030 | NM_024706    | ZNF668   | zinc finger protein 668              | 0.039  | 1.027 | 8.00E-01 | 8.00E+01 |  |  |
| 7995033 | NM_014699    | ZNF646   | zinc finger protein 646              | -0.058 | 0.961 | 5.38E-01 | 5.38E+01 |  |  |
| 7995040 | NM_00112295  | BCKDK    | branched chain ketoacid dehydrog     | 0.053  | 1.038 | 7.73E-01 | 7.73E+01 |  |  |
| 7995055 | NM_182958    | MYST1    | MYST histone acetyltransferase 1     | -0.015 | 0.989 | 9.33E-01 | 9.33E+01 |  |  |
| 7995069 | NM_004960    | FUS      | fusion (involved in t(12;16) in mali | 0.012  | 1.008 | 9.22E-01 | 9.22E+01 |  |  |
| 7995088 | NM_00100827  | TRIM72   | tripartite motif-containing 72       | -0.075 | 0.949 | 5.57E-01 | 5.57E+01 |  |  |
| 7995128 | NM_000887    | ITGAX    | integrin, alpha X (complement cor    | 0.130  | 1.094 | 7.64E-01 | 7.64E+01 |  |  |
| 7995161 | NM_005353    | ITGAD    | integrin, alpha D                    | 0.040  | 1.028 | 6.89E-01 | 6.89E+01 |  |  |
| 7995193 | NM_024742    | ARMCS    | armadillo repeat containing 5        | -0.064 | 0.957 | 4.03E-01 | 4.03E+01 |  |  |
| 7995206 | NM_00104245  | TGFB11   | transforming growth factor beta 1    | -0.049 | 0.967 | 5.63E-01 | 5.63E+01 |  |  |
| 7995222 | NM_003041    | SLC5A2   | solute carrier family 5 (sodium/glu  | -0.007 | 0.995 | 9.74E-01 | 9.74E+01 |  |  |
| 7995242 | BC021555     | C16orf67 | chromosome 16 open reading fram      | -0.100 | 0.933 | 2.81E-01 | 2.81E+01 |  |  |
| 7995252 | NM_00113091  | ZNF720   | zinc finger protein 720              | 0.170  | 1.125 | 3.91E-01 | 3.91E+01 |  |  |
| 7995258 | NM_003414    | ZNF267   | zinc finger protein 267              | -0.096 | 0.936 | 2.67E-01 | 2.67E+01 |  |  |
| 7995292 | NM_005629    | SLC6A8   | solute carrier family 6 (neurotrans  | 0.072  | 1.051 | 3.95E-01 | 3.95E+01 |  |  |
| 7995306 | ---          | ---      | ---                                  | 0.017  | 1.012 | 9.00E-01 | 9.00E+01 |  |  |
| 7995308 | ---          | ---      | ---                                  | 0.018  | 1.012 | 9.44E-01 | 9.44E+01 |  |  |
| 7995310 | ENST00000319 | MGC34800 | hypothetical protein MGC34800        | -0.020 | 0.986 | 8.67E-01 | 8.67E+01 |  |  |
| 7995320 | ---          | ---      | ---                                  | -0.101 | 0.932 | 3.26E-01 | 3.26E+01 |  |  |
| 7995322 | ---          | ---      | ---                                  | -0.030 | 0.980 | 8.35E-01 | 8.35E+01 |  |  |
| 7995324 | ---          | ---      | ---                                  | -0.047 | 0.968 | 7.36E-01 | 7.36E+01 |  |  |
| 7995326 | ---          | ---      | ---                                  | -0.004 | 0.997 | 9.86E-01 | 9.86E+01 |  |  |
| 7995328 | ---          | ---      | ---                                  | -0.129 | 0.914 | 1.94E-01 | 1.94E+01 |  |  |
| 7995330 | ---          | ---      | ---                                  | -0.038 | 0.974 | 8.05E-01 | 8.05E+01 |  |  |
| 7995332 | ---          | ---      | ---                                  | -0.021 | 0.986 | 9.09E-01 | 9.09E+01 |  |  |
| 7995334 | ---          | ---      | ---                                  | -0.008 | 0.994 | 9.66E-01 | 9.66E+01 |  |  |
| 7995336 | ---          | ---      | ---                                  | -0.047 | 0.968 | 7.44E-01 | 7.44E+01 |  |  |
| 7995338 | ---          | ---      | ---                                  | -0.036 | 0.975 | 7.81E-01 | 7.81E+01 |  |  |
| 7995340 | ---          | ---      | ---                                  | -0.071 | 0.952 | 5.21E-01 | 5.21E+01 |  |  |

|         |              |           |                                      |        |       |          |          |  |  |
|---------|--------------|-----------|--------------------------------------|--------|-------|----------|----------|--|--|
| 7995342 | ---          | ---       | ---                                  | -0.097 | 0.935 | 2.93E-01 | 2.93E+01 |  |  |
| 7995344 | ---          | ---       | ---                                  | -0.073 | 0.951 | 5.73E-01 | 5.73E+01 |  |  |
| 7995346 | ---          | ---       | ---                                  | -0.064 | 0.956 | 6.59E-01 | 6.59E+01 |  |  |
| 7995348 | ---          | ---       | ---                                  | -0.072 | 0.951 | 5.25E-01 | 5.25E+01 |  |  |
| 7995350 | ---          | ---       | ---                                  | -0.010 | 0.993 | 9.54E-01 | 9.54E+01 |  |  |
| 7995352 | ---          | ---       | ---                                  | -0.097 | 0.935 | 3.95E-01 | 3.95E+01 |  |  |
| 7995354 | NM_014321    | ORC6L     | origin recognition complex, subun    | 0.144  | 1.105 | 6.12E-01 | 6.12E+01 |  |  |
| 7995377 | ---          | ---       | ---                                  | 0.034  | 1.024 | 8.62E-01 | 8.62E+01 |  |  |
| 7995379 | BC013044     | DNAJA2    | DnaJ (Hsp40) homolog, subfamily      | -0.027 | 0.982 | 9.05E-01 | 9.05E+01 |  |  |
| 7995382 | NM_00103183  | PHKB      | phosphorylase kinase, beta           | 0.187  | 1.138 | 9.11E-02 | 9.11E+00 |  |  |
| 7995417 | ---          | ---       | ---                                  | 0.039  | 1.028 | 7.47E-01 | 7.47E+01 |  |  |
| 7995421 | NM_031490    | LONP2     | lon peptidase 2, peroxisomal         | 0.033  | 1.023 | 7.85E-01 | 7.85E+01 |  |  |
| 7995438 | ---          | ---       | ---                                  | 0.142  | 1.103 | 9.93E-02 | 9.93E+00 |  |  |
| 7995448 | NM_153261    | TMEM188   | transmembrane protein 188            | 0.203  | 1.151 | 2.09E-01 | 2.09E+01 |  |  |
| 7995456 | NM_182922    | HEATR3    | HEAT repeat containing 3             | 0.159  | 1.116 | 1.69E-01 | 1.69E+01 |  |  |
| 7995477 | ---          | ---       | ---                                  | 0.014  | 1.010 | 9.58E-01 | 9.58E+01 |  |  |
| 7995479 | NM_00104028  | PAPD5     | PAP associated domain containing     | 0.016  | 1.011 | 9.54E-01 | 9.54E+01 |  |  |
| 7995492 | NM_001114    | ADCY7     | adenylate cyclase 7                  | 0.157  | 1.115 | 5.88E-02 | 5.88E+00 |  |  |
| 7995525 | NM_033119    | NKD1      | naked cuticle homolog 1 (Drosoph     | -0.047 | 0.968 | 6.70E-01 | 6.70E+01 |  |  |
| 7995539 | NM_022162    | NOD2      | nucleotide-binding oligomerization   | -0.097 | 0.935 | 5.44E-01 | 5.44E+01 |  |  |
| 7995552 | NM_015247    | CYLD      | cylindromatosis (turban tumor syn    | -0.057 | 0.962 | 6.61E-01 | 6.61E+01 |  |  |
| 7995574 | NM_002136    | HNRNPA1   | heterogeneous nuclear ribonucleo     | -0.027 | 0.981 | 8.09E-01 | 8.09E+01 |  |  |
| 7995580 | ---          | ---       | ---                                  | 0.087  | 1.062 | 3.30E-01 | 3.30E+01 |  |  |
| 7995583 | NM_025134    | CHD9      | chromodomain helicase DNA bindi      | 0.271  | 1.207 | 6.70E-04 | 6.70E-02 |  |  |
| 7995627 | ---          | ---       | ---                                  | 0.074  | 1.053 | 6.73E-01 | 6.73E+01 |  |  |
| 7995629 | ---          | ---       | ---                                  | 0.018  | 1.013 | 9.49E-01 | 9.49E+01 |  |  |
| 7995631 | NM_005611    | RBL2      | retinoblastoma-like 2 (p130)         | 0.131  | 1.095 | 5.05E-01 | 5.05E+01 |  |  |
| 7995655 | NM_00108043  | FTO       | fat mass and obesity associated      | -0.048 | 0.967 | 7.95E-01 | 7.95E+01 |  |  |
| 7995668 | NM_005853    | IRX5      | iroquois homeobox 5                  | -0.022 | 0.985 | 8.37E-01 | 8.37E+01 |  |  |
| 7995674 | NM_024335    | IRX6      | iroquois homeobox 6                  | 0.017  | 1.012 | 9.07E-01 | 9.07E+01 |  |  |
| 7995681 | NM_004530    | MMP2      | matrix metalloproteinase 2 (gelatin  | 0.023  | 1.016 | 9.35E-01 | 9.35E+01 |  |  |
| 7995714 | NM_001043    | SLC6A2    | solute carrier family 6 (neurotrans  | 0.009  | 1.006 | 9.61E-01 | 9.61E+01 |  |  |
| 7995739 | NM_020988    | GNAO1     | guanine nucleotide binding protei    | -0.197 | 0.872 | 9.61E-02 | 9.61E+00 |  |  |
| 7995755 | NM_018233    | OGFOD1    | 2-oxoglutarate and iron-dependen     | 0.023  | 1.016 | 9.23E-01 | 9.23E+01 |  |  |
| 7995772 | NM_032935    | MT4       | metallothionein 4                    | -0.083 | 0.944 | 3.10E-01 | 3.10E+01 |  |  |
| 7995776 | NM_005954    | MT3       | metallothionein 3                    | -0.029 | 0.980 | 8.10E-01 | 8.10E+01 |  |  |
| 7995783 | NM_005953    | MT2A      | metallothionein 2A                   | -0.341 | 0.789 | 4.04E-01 | 4.04E+01 |  |  |
| 7995797 | NM_175617    | MT1E      | metallothionein 1E                   | -0.412 | 0.752 | 9.52E-02 | 9.52E+00 |  |  |
| 7995803 | AF348994     | MT1JP     | metallothionein 1J (pseudogene)      | -0.202 | 0.870 | 2.20E-01 | 2.20E+01 |  |  |
| 7995806 | NM_005946    | MT1A      | metallothionein 1A                   | -0.331 | 0.795 | 1.08E-01 | 1.08E+01 |  |  |
| 7995813 | NR_027781    | MT1DP     | metallothionein 1D (pseudogene)      | -0.158 | 0.896 | 2.54E-01 | 2.54E+01 |  |  |
| 7995820 | NM_005947    | MT1B      | metallothionein 1B                   | -0.169 | 0.889 | 2.25E-01 | 2.25E+01 |  |  |
| 7995829 | NM_005951    | MT1H      | metallothionein 1H                   | -0.525 | 0.695 | 1.74E-01 | 1.74E+01 |  |  |
| 7995834 | NR_003669    | MT1IP     | metallothionein 1I (pseudogene)      | -0.154 | 0.899 | 1.45E-01 | 1.45E+01 |  |  |
| 7995838 | NM_005952    | MT1X      | metallothionein 1X                   | -0.304 | 0.810 | 3.96E-01 | 3.96E+01 |  |  |
| 7995843 | NM_014669    | NUP93     | nucleoporin 93kDa                    | 0.010  | 1.007 | 9.57E-01 | 9.57E+01 |  |  |
| 7995868 | NM_000339    | SLC12A3   | solute carrier family 12 (sodium/cl  | -0.040 | 0.973 | 7.51E-01 | 7.51E+01 |  |  |
| 7995895 | NM_014685    | HERPUD1   | homocysteine-inducible, endoplas     | 0.211  | 1.157 | 5.95E-03 | 5.95E-01 |  |  |
| 7995907 | NM_000078    | CETP      | cholesteryl ester transfer protein,  | -0.054 | 0.964 | 5.39E-01 | 5.39E+01 |  |  |
| 7995926 | NM_032206    | NLRCS     | NLR family, CARD domain containi     | -0.028 | 0.981 | 7.97E-01 | 7.97E+01 |  |  |
| 7995976 | NM_152727    | CPNE2     | copine II                            | -0.085 | 0.943 | 4.88E-01 | 4.88E+01 |  |  |
| 7995994 | NM_133368    | RSRPY1    | ring finger and SPRY domain conta    | -0.046 | 0.969 | 8.06E-01 | 8.06E+01 |  |  |
| 7996012 | NM_012106    | ARL2BP    | ADP-ribosylation factor-like 2 bind  | -0.088 | 0.941 | 6.11E-01 | 6.11E+01 |  |  |
| 7996027 | NM_002996    | CX3CL1    | chemokine (C-X3-C motif) ligand 1    | -0.031 | 0.979 | 8.29E-01 | 8.29E+01 |  |  |
| 7996034 | NM_002987    | CCL17     | chemokine (C-C motif) ligand 17      | 0.032  | 1.022 | 7.70E-01 | 7.70E+01 |  |  |
| 7996041 | NM_020312    | COQ9      | coenzyme Q9 homolog (S. cerevisi     | -0.087 | 0.942 | 4.41E-01 | 4.41E+01 |  |  |
| 7996051 | NM_032940    | POLR2C    | polymerase (RNA) II (DNA directe     | 0.021  | 1.014 | 9.36E-01 | 9.36E+01 |  |  |
| 7996064 | NM_153837    | GPR114    | G protein-coupled receptor 114       | -0.021 | 0.986 | 9.01E-01 | 9.01E+01 |  |  |
| 7996081 | NM_201524    | GPR56     | G protein-coupled receptor 56        | 0.116  | 1.084 | 4.68E-01 | 4.68E+01 |  |  |
| 7996100 | NM_170776    | GPR97     | G protein-coupled receptor 97        | -0.090 | 0.940 | 5.98E-01 | 5.98E+01 |  |  |
| 7996137 | NM_005886    | KATNB1    | katanin p80 (WD repeat containin     | 0.016  | 1.011 | 9.03E-01 | 9.03E+01 |  |  |
| 7996160 | ENST00000335 | LOC388282 | hypothetical LOC388282               | 0.040  | 1.028 | 7.95E-01 | 7.95E+01 |  |  |
| 7996164 | NM_199046    | TEPP      | testis, prostate and placenta expre  | -0.057 | 0.961 | 5.73E-01 | 5.73E+01 |  |  |
| 7996174 | NM_024598    | C16orf57  | chromosome 16 open reading fram      | 0.016  | 1.011 | 9.25E-01 | 9.25E+01 |  |  |
| 7996185 | NM_002428    | MMP15     | matrix metalloproteinase 15 (mem     | 0.009  | 1.006 | 9.49E-01 | 9.49E+01 |  |  |
| 7996219 | NM_020465    | NDRG4     | NDRG family member 4                 | -0.030 | 0.980 | 8.02E-01 | 8.02E+01 |  |  |
| 7996241 | NM_00116030  | SETD6     | SET domain containing 6              | -0.031 | 0.979 | 8.36E-01 | 8.36E+01 |  |  |
| 7996256 | ---          | ---       | ---                                  | -0.045 | 0.969 | 7.87E-01 | 7.87E+01 |  |  |
| 7996264 | NM_001795    | CDH5      | cadherin 5, type 2 (vascular endot   | 0.015  | 1.010 | 9.07E-01 | 9.07E+01 |  |  |
| 7996281 | NM_00113610  | BEAN      | brain expressed, associated with N   | -0.074 | 0.950 | 2.89E-01 | 2.89E+01 |  |  |
| 7996286 | NM_004614    | TK2       | thymidine kinase 2, mitochondrial    | 0.023  | 1.016 | 9.03E-01 | 9.03E+01 |  |  |
| 7996290 | NM_052999    | CMTM1     | CKLF-like MARVEL transmembrane       | 0.019  | 1.013 | 9.29E-01 | 9.29E+01 |  |  |
| 7996313 | NM_144673    | CMTM2     | CKLF-like MARVEL transmembrane       | 0.025  | 1.017 | 8.50E-01 | 8.50E+01 |  |  |
| 7996318 | NM_144601    | CMTM3     | CKLF-like MARVEL transmembrane       | 0.030  | 1.021 | 8.52E-01 | 8.52E+01 |  |  |
| 7996341 | NM_020786    | PDP2      | pyruvate dehydrogenase phosphat      | 0.008  | 1.005 | 9.84E-01 | 9.84E+01 |  |  |
| 7996345 | NM_003869    | CES2      | carboxylesterase 2 (intestine, liver | 0.005  | 1.004 | 9.82E-01 | 9.82E+01 |  |  |
| 7996377 | NM_173815    | CES8      | carboxylesterase 8 (putative)        | 0.021  | 1.015 | 8.69E-01 | 8.69E+01 |  |  |

|         |             |           |                                                           |        |       |          |          |  |  |
|---------|-------------|-----------|-----------------------------------------------------------|--------|-------|----------|----------|--|--|
| 7996393 | NM_001755   | CBFB      | core-binding factor, beta subunit                         | 0.068  | 1.048 | 4.03E-01 | 4.03E+01 |  |  |
| 7996403 | NM_025187   | C16orf70  | chromosome 16 open reading frame                          | 0.051  | 1.036 | 8.15E-01 | 8.15E+01 |  |  |
| 7996423 | NM_018378   | FBXL8     | F-box and leucine-rich repeat protein                     | 0.022  | 1.016 | 8.15E-01 | 8.15E+01 |  |  |
| 7996430 | NM_00104066 | HSF4      | heat shock transcription factor 4                         | -0.030 | 0.979 | 7.45E-01 | 7.45E+01 |  |  |
| 7996448 | NM_003946   | NOL3      | nucleolar protein 3 (apoptosis repressor)                 | -0.053 | 0.964 | 5.91E-01 | 5.91E+01 |  |  |
| 7996455 | NM_001950   | E2F4      | E2F transcription factor 4, p107/p130                     | 0.066  | 1.047 | 5.29E-01 | 5.29E+01 |  |  |
| 7996468 | NM_024712   | ELMO3     | engulfment and cell motility 3                            | -0.037 | 0.975 | 7.19E-01 | 7.19E+01 |  |  |
| 7996490 | NM_014187   | TMEM208   | transmembrane protein 208                                 | 0.082  | 1.058 | 5.84E-01 | 5.84E+01 |  |  |
| 7996563 | NM_000196   | HSD11B2   | hydroxysteroid (11-beta) dehydrogenase                    | 0.030  | 1.021 | 8.63E-01 | 8.63E+01 |  |  |
| 7996571 | NM_024519   | FAM65A    | family with sequence similarity 65 member A               | -0.014 | 0.991 | 9.39E-01 | 9.39E+01 |  |  |
| 7996593 | NM_006565   | CTCF      | CCCTC-binding factor (zinc finger protein)                | 0.004  | 1.003 | 9.84E-01 | 9.84E+01 |  |  |
| 7996608 | NM_00101383 | RLTPR     | RGD motif, leucine rich repeats, transmembrane protein    | -0.038 | 0.974 | 6.62E-01 | 6.62E+01 |  |  |
| 7996647 | NM_016948   | PARD6A    | par-6 partitioning defective 6 homolog                    | -0.074 | 0.950 | 5.82E-01 | 5.82E+01 |  |  |
| 7996651 | NM_00101298 | C16orf86  | chromosome 16 open reading frame                          | -0.061 | 0.958 | 5.15E-01 | 5.15E+01 |  |  |
| 7996675 | NM_020457   | THAP11    | THAP domain containing 11                                 | -0.060 | 0.959 | 5.75E-01 | 5.75E+01 |  |  |
| 7996677 | NM_005796   | NUTF2     | nuclear transport factor 2                                | 0.066  | 1.047 | 7.36E-01 | 7.36E+01 |  |  |
| 7996685 | NM_014329   | EDC4      | enhancer of mRNA decapping 4                              | -0.015 | 0.990 | 9.24E-01 | 9.24E+01 |  |  |
| 7996715 | NM_198443   | NRN1L     | neuritin 1-like                                           | -0.005 | 0.997 | 9.77E-01 | 9.77E+01 |  |  |
| 7996720 | NM_006742   | PSKH1     | protein serine kinase H1                                  | -0.063 | 0.957 | 5.08E-01 | 5.08E+01 |  |  |
| 7996725 | NM_017803   | DUS2L     | dihydrouridine synthase 2-like, SMN2-like                 | 0.118  | 1.085 | 2.65E-01 | 2.65E+01 |  |  |
| 7996744 | NM_173163   | NFATC3    | nuclear factor of activated T-cells, cytoplasmic 3        | 0.087  | 1.062 | 3.72E-01 | 3.72E+01 |  |  |
| 7996759 | ---         | ---       | ---                                                       | 0.074  | 1.053 | 8.90E-01 | 8.90E+01 |  |  |
| 7996761 | NM_012320   | PLA2G15   | phospholipase A2, group XV                                | 0.058  | 1.041 | 7.13E-01 | 7.13E+01 |  |  |
| 7996772 | NM_003983   | SLC7A6    | solute carrier family 7 (cationic amino acid transporter) | 0.029  | 1.020 | 9.11E-01 | 9.11E+01 |  |  |
| 7996785 | NM_019023   | PRMT7     | protein arginine methyltransferase 7                      | -0.020 | 0.986 | 8.93E-01 | 8.93E+01 |  |  |
| 7996807 | NM_133458   | ZFP90     | zinc finger protein 90 homolog (mouse)                    | -0.049 | 0.966 | 8.34E-01 | 8.34E+01 |  |  |
| 7996860 | NM_024562   | TMCO7     | transmembrane and coiled-coil domain containing 7         | 0.121  | 1.088 | 3.20E-01 | 3.20E+01 |  |  |
| 7996883 | NM_005329   | HAS3      | hyaluronan synthase 3                                     | -0.023 | 0.984 | 8.45E-01 | 8.45E+01 |  |  |
| 7996891 | NM_032830   | CIRH1A    | cirrhosis, autosomal recessive 1A (mouse)                 | 0.113  | 1.081 | 5.17E-01 | 5.17E+01 |  |  |
| 7996908 | NM_006750   | SNTB2     | syntrophin, beta 2 (dystrophin-associated)                | 0.147  | 1.108 | 3.06E-01 | 3.06E+01 |  |  |
| 7996919 | NM_013245   | VPS4A     | vacuolar protein sorting 4 homolog A                      | 0.009  | 1.006 | 9.74E-01 | 9.74E+01 |  |  |
| 7996934 | NM_016101   | NIP7      | nuclear import 7 homolog (S. cerevisiae)                  | -0.069 | 0.954 | 7.85E-01 | 7.85E+01 |  |  |
| 7996947 | NM_030579   | CYB5B     | cytochrome b5 type B (outer mitochondrial membrane)       | -0.048 | 0.967 | 7.75E-01 | 7.75E+01 |  |  |
| 7996954 | NM_138714   | NFAT5     | nuclear factor of activated T-cells, cytoplasmic 5        | -0.120 | 0.920 | 8.61E-02 | 8.61E+00 |  |  |
| 7996976 | NM_007014   | WWP2      | WW domain containing E3 ubiquitin ligase                  | 0.016  | 1.011 | 9.36E-01 | 9.36E+01 |  |  |
| 7997010 | NM_182619   | CLEC18A   | C-type lectin domain family 18, member A                  | -0.027 | 0.981 | 8.34E-01 | 8.34E+01 |  |  |
| 7997025 | NM_017990   | PDPR      | pyruvate dehydrogenase phosphatase                        | -0.130 | 0.914 | 5.71E-01 | 5.71E+01 |  |  |
| 7997032 | NM_00101188 | CLEC18B   | C-type lectin domain family 18, member B                  | -0.020 | 0.986 | 8.69E-01 | 8.69E+01 |  |  |
| 7997048 | NM_007242   | DDX19B    | DEAD (Asp-Glu-Ala-As) box polypeptide                     | 0.116  | 1.084 | 4.24E-01 | 4.24E+01 |  |  |
| 7997059 | NM_018332   | DDX19A    | DEAD (Asp-Glu-Ala-As) box polypeptide                     | 0.031  | 1.022 | 8.99E-01 | 8.99E+01 |  |  |
| 7997072 | NM_145059   | FUK       | fucokinase                                                | 0.016  | 1.011 | 9.19E-01 | 9.19E+01 |  |  |
| 7997099 | NM_012426   | SF3B3     | splicing factor 3b, subunit 3, 130kDa                     | -0.007 | 0.995 | 9.75E-01 | 9.75E+01 |  |  |
| 7997128 | NM_152456   | IL34      | interleukin 34                                            | 0.007  | 1.005 | 9.64E-01 | 9.64E+01 |  |  |
| 7997135 | NM_138383   | MTSS1L    | metastasis suppressor 1-like                              | -0.010 | 0.993 | 9.50E-01 | 9.50E+01 |  |  |
| 7997139 | NM_001740   | CALB2     | calbindin 2                                               | 0.118  | 1.085 | 4.39E-02 | 4.39E+00 |  |  |
| 7997158 | NM_00101796 | MARVELD3  | MARVEL domain containing 3                                | -0.005 | 0.996 | 9.80E-01 | 9.80E+01 |  |  |
| 7997164 | ---         | ---       | ---                                                       | 0.074  | 1.053 | 7.94E-01 | 7.94E+01 |  |  |
| 7997168 | NM_014761   | KIAA0174  | KIAA0174                                                  | 0.055  | 1.039 | 6.46E-01 | 6.46E+01 |  |  |
| 7997179 | NM_001361   | DHODH     | dihydroorotate dehydrogenase                              | -0.022 | 0.985 | 8.97E-01 | 8.97E+01 |  |  |
| 7997192 | NM_020995   | HPR       | haptoglobin-related protein                               | -0.021 | 0.986 | 9.67E-01 | 9.67E+01 |  |  |
| 7997197 | NM_014003   | DHX38     | DEAH (Asp-Glu-Ala-His) box polypeptide                    | -0.121 | 0.920 | 1.61E-01 | 1.61E+01 |  |  |
| 7997226 | ---         | ---       | ---                                                       | 0.121  | 1.088 | 6.65E-01 | 6.65E+01 |  |  |
| 7997230 | NM_002811   | PSMD7     | proteasome (prosome, macropain) subunit type 7            | -0.041 | 0.972 | 7.68E-01 | 7.68E+01 |  |  |
| 7997239 | NR_003610   | PDXDC2    | pyridoxal-dependent decarboxylase                         | -0.017 | 0.988 | 8.85E-01 | 8.85E+01 |  |  |
| 7997245 | ---         | ---       | ---                                                       | 0.001  | 1.001 | 9.95E-01 | 9.95E+01 |  |  |
| 7997247 | NM_032268   | ZNRF1     | zinc and ring finger 1                                    | -0.060 | 0.959 | 5.28E-01 | 5.28E+01 |  |  |
| 7997257 | NM_153688   | ZFP1      | zinc finger protein 1 homolog (mouse)                     | -0.038 | 0.974 | 8.68E-01 | 8.68E+01 |  |  |
| 7997264 | NM_001906   | CTRB1     | chymotrypsinogen B1                                       | -0.010 | 0.993 | 9.54E-01 | 9.54E+01 |  |  |
| 7997272 | NM_007285   | GABARAPL2 | GABA(A) receptor-associated protein                       | -0.012 | 0.992 | 9.53E-01 | 9.53E+01 |  |  |
| 7997281 | NM_018975   | TERF2IP   | telomeric repeat binding factor 2, interacting protein    | 0.018  | 1.012 | 8.92E-01 | 8.92E+01 |  |  |
| 7997319 | ---         | ---       | ---                                                       | -0.054 | 0.963 | 6.29E-01 | 6.29E+01 |  |  |
| 7997321 | NM_014940   | MON1B     | MON1 homolog B (yeast)                                    | -0.017 | 0.989 | 9.43E-01 | 9.43E+01 |  |  |
| 7997332 | NM_00110566 | NUDT7     | nudix (nucleoside diphosphate-linked moiety X) motif 7    | -0.089 | 0.940 | 7.00E-01 | 7.00E+01 |  |  |
| 7997352 | NM_016373   | WWOX      | WW domain containing oxidoreductase                       | -0.040 | 0.973 | 6.80E-01 | 6.80E+01 |  |  |
| 7997396 | NM_015251   | ATMIN     | ATM interactor                                            | -0.064 | 0.957 | 5.14E-01 | 5.14E+01 |  |  |
| 7997414 | NM_022041   | GAN       | gigaxonin                                                 | 0.043  | 1.030 | 7.82E-01 | 7.82E+01 |  |  |
| 7997427 | NM_198390   | CMIP      | c-Maf-inducing protein                                    | 0.042  | 1.029 | 8.92E-01 | 8.92E+01 |  |  |
| 7997453 | NM_002661   | PLCG2     | phospholipase C, gamma 2 (phosphatidylinositol-specific)  | 0.240  | 1.181 | 1.21E-01 | 1.21E+01 |  |  |
| 7997489 | ---         | ---       | ---                                                       | 0.059  | 1.042 | 5.93E-01 | 5.93E+01 |  |  |
| 7997491 | NM_002153   | HSD17B2   | hydroxysteroid (17-beta) dehydrogenase                    | -0.003 | 0.998 | 9.86E-01 | 9.86E+01 |  |  |
| 7997498 | ---         | ---       | ---                                                       | -0.054 | 0.963 | 7.88E-01 | 7.88E+01 |  |  |
| 7997502 | ---         | ---       | ---                                                       | -0.027 | 0.982 | 8.53E-01 | 8.53E+01 |  |  |
| 7997520 | NM_001537   | HSBP1     | heat shock factor binding protein                         | 0.247  | 1.186 | 1.84E-02 | 1.84E+00 |  |  |
| 7997525 | NM_012213   | MLYCD     | malonyl-CoA decarboxylase                                 | -0.030 | 0.979 | 9.00E-01 | 9.00E+01 |  |  |
| 7997533 | NM_013370   | OSGIN1    | oxidative stress induced growth inhibitory factor 1       | 0.016  | 1.011 | 8.96E-01 | 8.96E+01 |  |  |
| 7997542 | NM_019065   | NECAB2    | N-terminal EF-hand calcium binding domain containing 2    | -0.071 | 0.952 | 5.17E-01 | 5.17E+01 |  |  |
| 7997556 | NM_178452   | LRRC50    | leucine rich repeat containing 50                         | -0.017 | 0.988 | 8.87E-01 | 8.87E+01 |  |  |

|         |              |              |                                      |        |       |          |          |  |
|---------|--------------|--------------|--------------------------------------|--------|-------|----------|----------|--|
| 7997569 | NM_139174    | ADAD2        | adenosine deaminase domain con       | -0.036 | 0.975 | 6.68E-01 | 6.68E+01 |  |
| 7997582 | NM_021197    | WFDC1        | WAP four-disulfide core domain 1     | -0.017 | 0.988 | 9.01E-01 | 9.01E+01 |  |
| 7997626 | NM_024731    | KLHL36       | kelch-like 36 (Drosophila)           | 0.055  | 1.039 | 7.02E-01 | 7.02E+01 |  |
| 7997633 | NM_005153    | USP10        | ubiquitin specific peptidase 10      | 0.029  | 1.020 | 9.05E-01 | 9.05E+01 |  |
| 7997662 | NM_014732    | KIAA0513     | KIAA0513                             | 0.061  | 1.043 | 7.46E-01 | 7.46E+01 |  |
| 7997676 | BC030801     | TMEM148      | transmembrane protein 148            | -0.016 | 0.989 | 9.33E-01 | 9.33E+01 |  |
| 7997680 | NM_014615    | KIAA0182     | KIAA0182                             | 0.013  | 1.009 | 9.42E-01 | 9.42E+01 |  |
| 7997702 | NM_001861    | COX4I1       | cytochrome c oxidase subunit IV is   | 0.007  | 1.005 | 9.67E-01 | 9.67E+01 |  |
| 7997726 | NM_001451    | FOXF1        | forkhead box F1                      | 0.011  | 1.008 | 9.53E-01 | 9.53E+01 |  |
| 7997733 | NM_005251    | FOXC2        | forkhead box C2 (MFH-1, mesench      | 0.013  | 1.009 | 9.29E-01 | 9.29E+01 |  |
| 7997735 | NM_005250    | FOXL1        | forkhead box L1                      | -0.099 | 0.933 | 2.16E-01 | 2.16E+01 |  |
| 7997740 | NM_022818    | MAP1LC3B     | microtubule-associated protein 1     | -0.022 | 0.985 | 9.20E-01 | 9.20E+01 |  |
| 7997746 | NM_020655    | JPH3         | junctophilin 3                       | -0.021 | 0.986 | 8.90E-01 | 8.90E+01 |  |
| 7997755 | NM_079837    | BANP         | BTG3 associated nuclear protein      | -0.108 | 0.928 | 2.91E-01 | 2.91E+01 |  |
| 7997765 | NM_00112746  | ZNF469       | zinc finger protein 469              | 0.021  | 1.015 | 9.08E-01 | 9.08E+01 |  |
| 7997767 | NM_153813    | ZFPM1        | zinc finger protein, multitype 1     | -0.087 | 0.942 | 3.74E-01 | 3.74E+01 |  |
| 7997779 | NM_144604    | ZC3H18       | zinc finger CCH-type containing 1    | -0.067 | 0.955 | 5.29E-01 | 5.29E+01 |  |
| 7997801 | NM_013278    | IL17C        | interleukin 17C                      | -0.073 | 0.951 | 2.00E-01 | 2.00E+01 |  |
| 7997808 | ENST00000435 | MGC23284     | hypothetical LOC197187               | 0.055  | 1.039 | 8.41E-01 | 8.41E+01 |  |
| 7997810 | NM_00101275  | CTU2         | cytosolic thiouridylase subunit 2 h  | -0.018 | 0.988 | 8.91E-01 | 8.91E+01 |  |
| 7997827 | NM_00114286  | FAM38A       | family with sequence similarity 38   | -0.017 | 0.988 | 9.22E-01 | 9.22E+01 |  |
| 7997832 | ENST00000333 | FLJ40448     | hypothetical protein FLJ40448        | -0.026 | 0.982 | 8.62E-01 | 8.62E+01 |  |
| 7997839 | NM_030928    | CDT1         | chromatin licensing and DNA repli    | -0.023 | 0.984 | 8.61E-01 | 8.61E+01 |  |
| 7997852 | NM_016209    | TRAPPC2L     | trafficking protein particle comple  | -0.010 | 0.993 | 9.62E-01 | 9.62E+01 |  |
| 7997861 | ENST00000452 | LOC642452    | hypothetical LOC642452               | 0.067  | 1.048 | 6.59E-01 | 6.59E+01 |  |
| 7997863 | NM_174917    | ACSF3        | acyl-CoA synthetase family memb      | -0.070 | 0.953 | 5.48E-01 | 5.48E+01 |  |
| 7997875 | NR_024347    | C16orf81     | chromosome 16 open reading fram      | -0.039 | 0.973 | 7.55E-01 | 7.55E+01 |  |
| 7997896 | NM_182531    | ZNF778       | zinc finger protein 778              | 0.000  | 1.000 | 1.00E+00 | 1.00E+02 |  |
| 7997904 | AK295122     | ZNF778       | zinc finger protein 778              | 0.245  | 1.185 | 7.07E-01 | 7.07E+01 |  |
| 7997907 | NM_013275    | ANKRD11      | ankyrin repeat domain 11             | -0.052 | 0.965 | 6.61E-01 | 6.61E+01 |  |
| 7997909 | NM_003119    | SPG7         | spastic paraplegia 7 (pure and con   | -0.009 | 0.994 | 9.58E-01 | 9.58E+01 |  |
| 7997933 | NM_033251    | RPL13        | ribosomal protein L13                | -0.072 | 0.951 | 7.09E-01 | 7.09E+01 |  |
| 7997940 | NR_002450    | SNORD68      | small nucleolar RNA, C/D box 68      | -0.022 | 0.985 | 9.73E-01 | 9.73E+01 |  |
| 7997942 | NM_014427    | CPNE7        | copine VII                           | -0.008 | 0.994 | 9.53E-01 | 9.53E+01 |  |
| 7997962 | NM_004413    | DPEP1        | dipeptidase 1 (renal)                | -0.030 | 0.980 | 8.36E-01 | 8.36E+01 |  |
| 7997976 | AK303024     | C16orf55     | chromosome 16 open reading fram      | -0.086 | 0.942 | 4.45E-01 | 4.45E+01 |  |
| 7997982 | NM_052988    | CDK10        | cyclin-dependent kinase 10           | -0.046 | 0.969 | 7.15E-01 | 7.15E+01 |  |
| 7998002 | NM_152287    | ZNF276       | zinc finger protein 276              | -0.061 | 0.959 | 5.98E-01 | 5.98E+01 |  |
| 7998015 | NM_032451    | SPIRE2       | spire homolog 2 (Drosophila)         | -0.037 | 0.975 | 7.56E-01 | 7.56E+01 |  |
| 7998033 | NM_014972    | TCF25        | transcription factor 25 (basic helix | -0.115 | 0.923 | 1.27E-01 | 1.27E+01 |  |
| 7998053 | ---          | ---          | ---                                  | -0.086 | 0.942 | 6.27E-01 | 6.27E+01 |  |
| 7998055 | NM_002386    | MC1R         | melanocortin 1 receptor (alpha m     | -0.075 | 0.949 | 4.70E-01 | 4.70E+01 |  |
| 7998063 | NM_006086    | TUBB3        | tubulin, beta 3                      | -0.082 | 0.945 | 2.43E-01 | 2.43E+01 |  |
| 7998072 | NM_007514    | DEF8         | differentially expressed in FDCP 8   | 0.007  | 1.005 | 9.78E-01 | 9.78E+01 |  |
| 7998083 | NR_003228    | AFG3L1       | AFG3 ATPase family gene 3-like 1     | 0.027  | 1.019 | 8.10E-01 | 8.10E+01 |  |
| 7998103 | NM_001481    | GAS8         | growth arrest-specific 8             | -0.072 | 0.951 | 6.47E-01 | 6.47E+01 |  |
| 7998115 | ---          | ---          | ---                                  | 0.267  | 1.203 | 4.25E-01 | 4.25E+01 |  |
| 7998117 | NM_007366    | 40A35        | septin 14                            | 0.013  | 1.009 | 9.74E-01 | 9.74E+01 |  |
| 7998119 | NR_024540    | WASH5P       | WAS protein family homolog 5 pse     | -0.068 | 0.954 | 5.58E-01 | 5.58E+01 |  |
| 7998129 | NM_016310    | POLR3K       | polymyrase (RNA) III (DNA directe    | 0.023  | 1.016 | 9.03E-01 | 9.03E+01 |  |
| 7998136 | NM_022450    | RHBDP1       | rhomboid 5 homolog 1 (Drosophila)    | -0.028 | 0.981 | 8.13E-01 | 8.13E+01 |  |
| 7998157 | NM_00107735  | C16orf35     | chromosome 16 open reading fram      | -0.067 | 0.954 | 4.07E-01 | 4.07E+01 |  |
| 7998174 | NM_018032    | LUC7L        | LUC7-like (S. cerevisiae)            | -0.048 | 0.967 | 7.08E-01 | 7.08E+01 |  |
| 7998211 | NM_003502    | AXIN1        | axin 1                               | -0.035 | 0.976 | 7.68E-01 | 7.68E+01 |  |
| 7998222 | NM_006428    | MRPL28       | mitochondrial ribosomal protein L    | -0.050 | 0.966 | 7.44E-01 | 7.44E+01 |  |
| 7998233 | NM_021259    | TMEM8A       | transmembrane protein 8A             | 0.002  | 1.001 | 9.89E-01 | 9.89E+01 |  |
| 7998249 | ---          | ---          | ---                                  | -0.161 | 0.895 | 6.93E-01 | 6.93E+01 |  |
| 7998251 | NM_032366    | C16orf13     | chromosome 16 open reading fram      | 0.019  | 1.013 | 8.89E-01 | 8.89E+01 |  |
| 7998265 | AK097604     | LOC100130285 | hypothetical LOC100130285            | -0.014 | 0.990 | 9.12E-01 | 9.12E+01 |  |
| 7998267 | NM_00100592  | JMJD8        | jumonji domain containing 8          | 0.015  | 1.010 | 9.49E-01 | 9.49E+01 |  |
| 7998280 | NM_032259    | WDR24        | WD repeat domain 24                  | -0.003 | 0.998 | 9.85E-01 | 9.85E+01 |  |
| 7998297 | NM_153350    | FBXL16       | F-box and leucine-rich repeat prot   | -0.066 | 0.956 | 5.13E-01 | 5.13E+01 |  |
| 7998307 | NM_00103173  | CCDC78       | coiled-coil domain containing 78     | 0.034  | 1.024 | 7.64E-01 | 7.64E+01 |  |
| 7998336 | NM_022493    | NARFL        | nuclear prelamin A recognition fac   | -0.020 | 0.986 | 9.16E-01 | 9.16E+01 |  |
| 7998351 | NM_00102519  | MSLN         | mesothelin-like                      | -0.038 | 0.974 | 6.99E-01 | 6.99E+01 |  |
| 7998367 | NM_058192    | RPUSD1       | RNA pseudouridylyate synthase do     | -0.038 | 0.974 | 7.87E-01 | 7.87E+01 |  |
| 7998374 | NM_016541    | GNG13        | guanine nucleotide binding protei    | -0.028 | 0.981 | 8.24E-01 | 8.24E+01 |  |
| 7998381 | NM_022773    | LMF1         | lipase maturation factor 1           | -0.017 | 0.988 | 9.34E-01 | 9.34E+01 |  |
| 7998392 | ---          | ---          | ---                                  | -0.006 | 0.996 | 9.71E-01 | 9.71E+01 |  |
| 7998399 | ---          | ---          | ---                                  | -0.033 | 0.977 | 7.92E-01 | 7.92E+01 |  |
| 7998405 | NR_027242    | LOC146336    | hypothetical LOC146336               | 0.005  | 1.003 | 9.85E-01 | 9.85E+01 |  |
| 7998407 | NM_027419    | C1QTNF8      | C1q and tumor necrosis factor rela   | -0.030 | 0.979 | 8.22E-01 | 8.22E+01 |  |
| 7998414 | ---          | ---          | ---                                  | -0.045 | 0.969 | 6.69E-01 | 6.69E+01 |  |
| 7998427 | NM_012467    | TPSG1        | tryptase gamma 1                     | -0.013 | 0.991 | 9.36E-01 | 9.36E+01 |  |
| 7998434 | NM_003294    | TPSAB1       | tryptase alpha/beta 1                | -0.046 | 0.969 | 6.52E-01 | 6.52E+01 |  |
| 7998444 | ENST00000440 | PRSS29P      | protease, serine, 29 pseudogene      | -0.019 | 0.987 | 8.78E-01 | 8.78E+01 |  |
| 7998449 | NM_00100141  | C16orf42     | chromosome 16 open reading fram      | -0.065 | 0.956 | 6.23E-01 | 6.23E+01 |  |

|         |             |          |                                       |        |       |          |          |  |
|---------|-------------|----------|---------------------------------------|--------|-------|----------|----------|--|
| 7998457 | NM_023076   | UNKL     | unkempt homolog (Drosophila)-lik      | -0.051 | 0.965 | 6.40E-01 | 6.40E+01 |  |
| 7998466 | NM_00103712 | UNKL     | unkempt homolog (Drosophila)-lik      | -0.042 | 0.971 | 6.92E-01 | 6.92E+01 |  |
| 7998485 | BC092497    | C16orf91 | chromosome 16 open reading fram       | -0.002 | 0.999 | 9.90E-01 | 9.90E+01 |  |
| 7998494 | NM_00114398 | CCDC154  | coiled-coil domain containing 154     | -0.009 | 0.994 | 9.53E-01 | 9.53E+01 |  |
| 7998510 | NM_001287   | CLCN7    | chloride channel 7                    | 0.087  | 1.062 | 5.60E-01 | 5.60E+01 |  |
| 7998538 | NM_00101365 | C16orf38 | chromosome 16 open reading fram       | -0.021 | 0.985 | 8.79E-01 | 8.79E+01 |  |
| 7998542 | NM_014714   | IFT140   | intraflagellar transport 140 homol    | -0.006 | 0.996 | 9.77E-01 | 9.77E+01 |  |
| 7998577 | NM_002513   | NME3     | non-metastatic cells 3, protein exp   | -0.033 | 0.977 | 8.31E-01 | 8.31E+01 |  |
| 7998585 | NM_023936   | MRPS34   | mitochondrial ribosomal protein S     | 0.015  | 1.011 | 9.34E-01 | 9.34E+01 |  |
| 7998590 | NM_080861   | SPSB3    | splA/ryanodine receptor domain a      | -0.068 | 0.954 | 4.26E-01 | 4.26E+01 |  |
| 7998601 | NM_00114600 | IGFALS   | insulin-like growth factor binding g  | 0.083  | 1.059 | 3.28E-01 | 3.28E+01 |  |
| 7998604 | NM_005326   | HAGH     | hydroxyacylglutathione hydrolase      | -0.059 | 0.960 | 6.56E-01 | 6.56E+01 |  |
| 7998629 | ---         | ---      | ---                                   | -0.031 | 0.979 | 7.40E-01 | 7.40E+01 |  |
| 7998634 | NM_00100960 | HS3ST6   | heparan sulfate (glucosamine) 3-O     | -0.082 | 0.945 | 5.41E-01 | 5.41E+01 |  |
| 7998637 | NM_016332   | SEPX1    | selenoprotein X, 1                    | -0.101 | 0.932 | 4.05E-01 | 4.05E+01 |  |
| 7998643 | NM_005061   | RPL3L    | ribosomal protein L3-like             | -0.093 | 0.937 | 2.39E-01 | 2.39E+01 |  |
| 7998655 | NM_002952   | RPS2     | ribosomal protein S2                  | -0.005 | 0.996 | 9.77E-01 | 9.77E+01 |  |
| 7998664 | NR_002327   | SNORA10  | small nucleolar RNA, H/ACA box 1      | -0.099 | 0.934 | 5.38E-01 | 5.38E+01 |  |
| 7998668 | NM_144603   | NOXO1    | NADPH oxidase organizer 1             | -0.021 | 0.986 | 8.53E-01 | 8.53E+01 |  |
| 7998679 | NM_178167   | ZNF598   | zinc finger protein 598               | -0.050 | 0.966 | 6.81E-01 | 6.81E+01 |  |
| 7998692 | NM_002528   | NTHL1    | nth endonuclease III-like 1 (E. coli) | 0.029  | 1.020 | 8.63E-01 | 8.63E+01 |  |
| 7998700 | NM_00100994 | PKD1     | polycystic kidney disease 1 (autos    | -0.036 | 0.975 | 8.05E-01 | 8.05E+01 |  |
| 7998724 | NM_020764   | CASKIN1  | CASK interacting protein 1            | -0.072 | 0.951 | 5.25E-01 | 5.25E+01 |  |
| 7998749 | NM_022372   | MLST8    | MTOR associated protein, LST8 ho      | -0.019 | 0.987 | 9.14E-01 | 9.14E+01 |  |
| 7998759 | NM_00104237 | PGP      | phosphoglycolate phosphatase          | -0.089 | 0.940 | 3.42E-01 | 3.42E+01 |  |
| 7998762 | NM_001919   | DCI      | dodecenoyl-Coenzyme A delta iso       | -0.107 | 0.928 | 6.04E-02 | 6.04E+00 |  |
| 7998774 | NM_080594   | RNP51    | RNA binding protein S1, serine-ric    | 0.008  | 1.005 | 9.54E-01 | 9.54E+01 |  |
| 7998817 | NM_00104821 | CEMP1    | cementum protein 1                    | 0.010  | 1.007 | 9.51E-01 | 9.51E+01 |  |
| 7998820 | AK293900    | PDPK1    | 3-phosphoinositide dependent pr       | 0.147  | 1.107 | 2.27E-01 | 2.27E+01 |  |
| 7998823 | NM_002613   | PDPK1    | 3-phosphoinositide dependent pr       | 0.117  | 1.084 | 2.56E-01 | 2.56E+01 |  |
| 7998825 | NM_002613   | PDPK1    | 3-phosphoinositide dependent pr       | 0.197  | 1.147 | 1.52E-01 | 1.52E+01 |  |
| 7998835 | ---         | ---      | ---                                   | -0.004 | 0.997 | 9.85E-01 | 9.85E+01 |  |
| 7998841 | NM_002613   | PDPK1    | 3-phosphoinositide dependent pr       | 0.117  | 1.084 | 2.56E-01 | 2.56E+01 |  |
| 7998843 | NM_031948   | PRSS27   | protease, serine 27                   | -0.036 | 0.975 | 7.63E-01 | 7.63E+01 |  |
| 7998852 | NM_007108   | TCEB2    | transcription elongation factor B (   | 0.062  | 1.044 | 6.90E-01 | 6.90E+01 |  |
| 7998861 | NM_152891   | PRSS33   | protease, serine, 33                  | -0.083 | 0.944 | 2.11E-01 | 2.11E+01 |  |
| 7998872 | NR_026864   | TMPRSS8  | transmembrane protease, serine 8      | 0.015  | 1.011 | 9.05E-01 | 9.05E+01 |  |
| 7998878 | NM_022119   | PRSS22   | protease, serine, 22                  | -0.053 | 0.964 | 6.24E-01 | 6.24E+01 |  |
| 7998886 | NM_182687   | PKMYT1   | protein kinase, membrane associa      | -0.052 | 0.965 | 5.96E-01 | 5.96E+01 |  |
| 7998902 | NM_017885   | HCFC1R1  | host cell factor C1 regulator 1 (XPD  | -0.011 | 0.993 | 9.49E-01 | 9.49E+01 |  |
| 7998910 | NM_00110317 | CCDC64B  | coiled-coil domain containing 64B     | -0.107 | 0.928 | 3.64E-01 | 3.64E+01 |  |
| 7998921 | NM_032805   | ZSCAN10  | zinc finger and SCAN domain cont      | -0.048 | 0.967 | 7.27E-01 | 7.27E+01 |  |
| 7998927 | ---         | ---      | ---                                   | -0.019 | 0.987 | 9.77E-01 | 9.77E+01 |  |
| 7998931 | NM_198088   | ZNF200   | zinc finger protein 200               | 0.013  | 1.009 | 9.49E-01 | 9.49E+01 |  |
| 7998940 | NM_000243   | MEFV     | Mediterranean fever                   | 0.011  | 1.008 | 9.80E-01 | 9.80E+01 |  |
| 7998952 | NM_033208   | TIGD7    | tigger transposable element deriv     | -0.027 | 0.982 | 9.34E-01 | 9.34E+01 |  |
| 7998967 | NM_017810   | ZNF434   | zinc finger protein 434               | -0.025 | 0.983 | 8.76E-01 | 8.76E+01 |  |
| 7998983 | NM_178844   | NLRC3    | NLR family, CARD domain containi      | -0.102 | 0.932 | 3.05E-01 | 3.05E+01 |  |
| 7999008 | NM_032444   | BTBD12   | BTB (POZ) domain containing 12        | -0.007 | 0.995 | 9.68E-01 | 9.68E+01 |  |
| 7999023 | ---         | ---      | ---                                   | -0.100 | 0.933 | 6.34E-01 | 6.34E+01 |  |
| 7999025 | NM_016292   | TRAP1    | TNF receptor-associated protein 1     | 0.046  | 1.032 | 7.98E-01 | 7.98E+01 |  |
| 7999044 | NM_004380   | CREBBP   | CREB binding protein                  | -0.062 | 0.958 | 3.31E-01 | 3.31E+01 |  |
| 7999079 | NM_001116   | ADCY9    | adenylate cyclase 9                   | 0.028  | 1.020 | 9.11E-01 | 9.11E+01 |  |
| 7999102 | NM_003223   | TFAP4    | transcription factor AP-4 (activatin  | -0.011 | 0.992 | 9.56E-01 | 9.56E+01 |  |
| 7999112 | NM_016069   | Magmas   | mitochondria-associated protein in    | 0.001  | 1.000 | 9.99E-01 | 9.99E+01 |  |
| 7999120 | NM_024535   | CORO7    | coronin 7                             | -0.046 | 0.968 | 5.89E-01 | 5.89E+01 |  |
| 7999149 | NM_020677   | NMRAL1   | NmrA-like family domain containi      | 0.004  | 1.003 | 9.86E-01 | 9.86E+01 |  |
| 7999160 | NM_013399   | C16orf5  | chromosome 16 open reading fram       | -0.035 | 0.976 | 8.27E-01 | 8.27E+01 |  |
| 7999173 | NM_145253   | FAM100A  | family with sequence similarity 10    | 0.039  | 1.028 | 8.05E-01 | 8.05E+01 |  |
| 7999177 | NM_133450   | ANKS3    | ankyrin repeat and sterile alpha m    | -0.021 | 0.986 | 9.03E-01 | 9.03E+01 |  |
| 7999196 | NM_021646   | ZNF500   | zinc finger protein 500               | 0.001  | 1.001 | 9.95E-01 | 9.95E+01 |  |
| 7999217 | NM_024589   | ROGD1    | rogdi homolog (Drosophila)            | 0.016  | 1.011 | 9.16E-01 | 9.16E+01 |  |
| 7999233 | NM_032569   | GLYR1    | glyoxylate reductase 1 homolog (A     | 0.047  | 1.033 | 6.35E-01 | 6.35E+01 |  |
| 7999253 | NM_002705   | PPL      | perioplakin                           | -0.074 | 0.950 | 4.50E-01 | 4.50E+01 |  |
| 7999279 | NM_016256   | NAGPA    | N-acetylglucosamine-1-phosphodi       | -0.079 | 0.947 | 4.27E-01 | 4.27E+01 |  |
| 7999291 | NM_152459   | C16orf89 | chromosome 16 open reading fram       | -0.023 | 0.985 | 8.64E-01 | 8.64E+01 |  |
| 7999304 | NM_201400   | FAM86A   | family with sequence similarity 86    | -0.007 | 0.995 | 9.68E-01 | 9.68E+01 |  |
| 7999317 | NM_015421   | TMEM186  | transmembrane protein 186             | 0.021  | 1.015 | 9.51E-01 | 9.51E+01 |  |
| 7999319 | NM_014316   | CARHSP1  | calcium regulated heat stable prot    | -0.016 | 0.989 | 9.16E-01 | 9.16E+01 |  |
| 7999326 | NM_003470   | USP7     | ubiquitin specific peptidase 7 (her   | -0.013 | 0.991 | 9.27E-01 | 9.27E+01 |  |
| 7999356 | ---         | ---      | ---                                   | -0.113 | 0.925 | 5.36E-01 | 5.36E+01 |  |
| 7999360 | NM_000982   | RPL21    | ribosomal protein L21                 | -0.018 | 0.988 | 9.33E-01 | 9.33E+01 |  |
| 7999362 | ---         | ---      | ---                                   | -0.004 | 0.997 | 9.94E-01 | 9.94E+01 |  |
| 7999382 | ---         | ---      | ---                                   | -0.026 | 0.982 | 8.78E-01 | 8.78E+01 |  |
| 7999384 | ---         | ---      | ---                                   | 0.162  | 1.119 | 5.67E-01 | 5.67E+01 |  |
| 7999406 | ---         | ---      | ---                                   | 0.067  | 1.047 | 6.66E-01 | 6.66E+01 |  |
| 7999412 | NM_00107951 | FAM18A   | family with sequence similarity 18    | -0.258 | 0.836 | 2.83E-02 | 2.83E+00 |  |



|         |              |           |                                      |        |       |          |          |  |  |
|---------|--------------|-----------|--------------------------------------|--------|-------|----------|----------|--|--|
| 7999419 | NM_014015    | DEXI      | Dexi homolog (mouse)                 | -0.018 | 0.988 | 9.56E-01 | 9.56E+01 |  |  |
| 7999423 | NM_003745    | SOC51     | suppressor of cytokine signaling 1   | -0.131 | 0.913 | 7.17E-02 | 7.17E+00 |  |  |
| 7999427 | NM_005425    | TNP2      | transition protein 2 (during histon  | 0.037  | 1.026 | 7.73E-01 | 7.73E+01 |  |  |
| 7999431 | NM_021247    | PRM3      | protamine 3                          | -0.060 | 0.959 | 6.68E-01 | 6.68E+01 |  |  |
| 7999433 | ---          | ---       | ---                                  | -0.024 | 0.983 | 8.51E-01 | 8.51E+01 |  |  |
| 7999435 | NM_002762    | PRM2      | protamine 2                          | -0.012 | 0.992 | 9.50E-01 | 9.50E+01 |  |  |
| 7999447 | ENST00000344 | LOC400499 | hypothetical LOC400499               | -0.028 | 0.981 | 8.63E-01 | 8.63E+01 |  |  |
| 7999468 | NR_024320    | LITAF     | lipopolysaccharide-induced TNF fa    | 0.198  | 1.147 | 2.93E-01 | 2.93E+01 |  |  |
| 7999476 | ---          | ---       | ---                                  | 0.218  | 1.163 | 6.39E-01 | 6.39E+01 |  |  |
| 7999478 | NM_015914    | TXNDC11   | thioredoxin domain containing 11     | 0.137  | 1.100 | 2.76E-02 | 2.76E+00 |  |  |
| 7999496 | NM_014153    | ZC3H7A    | zinc finger CCCH-type containing 7   | 0.024  | 1.017 | 9.00E-01 | 9.00E+01 |  |  |
| 7999520 | NM_015659    | RSL1D1    | ribosomal L1 domain containing 1     | 0.008  | 1.006 | 9.69E-01 | 9.69E+01 |  |  |
| 7999532 | NM_002094    | GSPT1     | G1 to S phase transition 1           | 0.007  | 1.005 | 9.74E-01 | 9.74E+01 |  |  |
| 7999553 | NM_018340    | CPPED1    | calcineurin-like phosphoesterase d   | 0.208  | 1.155 | 3.76E-01 | 3.76E+01 |  |  |
| 7999562 | NM_002582    | PARN      | poly(A)-specific ribonuclease (dea   | -0.015 | 0.990 | 9.22E-01 | 9.22E+01 |  |  |
| 7999591 | NR_023387    | ABCC6P2   | ATP-binding cassette, sub-family C   | -0.083 | 0.944 | 3.26E-01 | 3.26E+01 |  |  |
| 7999594 | ---          | ---       | ---                                  | 0.023  | 1.016 | 9.74E-01 | 9.74E+01 |  |  |
| 7999596 | NM_138346    | KIAA2013  | KIAA2013                             | -0.033 | 0.977 | 7.93E-01 | 7.93E+01 |  |  |
| 7999598 | NM_173474    | NTAN1     | N-terminal asparagine amidase        | 0.233  | 1.175 | 1.50E-01 | 1.50E+01 |  |  |
| 7999608 | NM_018427    | RRN3      | RRN3 RNA polymerase I transcript     | 0.044  | 1.031 | 8.84E-01 | 8.84E+01 |  |  |
| 7999614 | NM_006985    | NP1P      | nuclear pore complex interacting t   | -0.045 | 0.969 | 7.11E-01 | 7.11E+01 |  |  |
| 7999634 | NM_006985    | NP1P      | nuclear pore complex interacting t   | -0.023 | 0.984 | 9.12E-01 | 9.12E+01 |  |  |
| 7999642 | NM_014647    | KIAA0430  | KIAA0430                             | -0.009 | 0.994 | 9.57E-01 | 9.57E+01 |  |  |
| 7999674 | NM_022844    | MYH11     | myosin, heavy chain 11, smooth m     | -0.101 | 0.933 | 2.96E-01 | 2.96E+01 |  |  |
| 7999718 | AY507846     | C16orf63  | chromosome 16 open reading fram      | 0.071  | 1.051 | 6.89E-01 | 6.89E+01 |  |  |
| 7999725 | ---          | ---       | ---                                  | 0.047  | 1.033 | 7.57E-01 | 7.57E+01 |  |  |
| 7999727 | NM_001171    | ABCC6     | ATP-binding cassette, sub-family C   | -0.032 | 0.978 | 7.89E-01 | 7.89E+01 |  |  |
| 7999750 | ---          | ---       | ---                                  | 0.023  | 1.016 | 9.74E-01 | 9.74E+01 |  |  |
| 7999752 | NM_020466    | LYRM2     | LYR motif containing 2               | 0.090  | 1.064 | 7.10E-01 | 7.10E+01 |  |  |
| 7999754 | NM_022166    | XYLT1     | xylosyltransferase I                 | -0.073 | 0.951 | 3.94E-01 | 3.94E+01 |  |  |
| 7999766 | NM_006985    | NP1P      | nuclear pore complex interacting t   | -0.021 | 0.985 | 8.04E-01 | 8.04E+01 |  |  |
| 7999769 | NM_006985    | NP1P      | nuclear pore complex interacting t   | -0.032 | 0.978 | 7.18E-01 | 7.18E+01 |  |  |
| 7999791 | NM_00100406  | NOMO3     | NODAL modulator 3                    | 0.000  | 1.000 | 1.00E+00 | 1.00E+02 |  |  |
| 7999827 | NM_001019    | RPS15A    | ribosomal protein S15a               | 0.055  | 1.039 | 6.81E-01 | 6.81E+01 |  |  |
| 7999834 | NM_015161    | ARL6IP1   | ADP-ribosylation factor-like 6 inter | 0.086  | 1.061 | 5.76E-01 | 5.76E+01 |  |  |
| 7999841 | NM_015092    | SMG1      | SMG1 homolog, phosphatidylinosi      | 0.030  | 1.021 | 8.48E-01 | 8.48E+01 |  |  |
| 7999884 | ---          | ---       | ---                                  | 0.036  | 1.025 | 9.23E-01 | 9.23E+01 |  |  |
| 7999889 | NM_016641    | GDE1      | glycerophosphodiester phosphodi      | 0.116  | 1.084 | 4.97E-01 | 4.97E+01 |  |  |
| 7999903 | BC117562     | C16orf88  | chromosome 16 open reading fram      | 0.106  | 1.076 | 5.79E-01 | 5.79E+01 |  |  |
| 7999916 | NM_00100291  | GPR139    | G protein-coupled receptor 139       | -0.050 | 0.966 | 6.57E-01 | 6.57E+01 |  |  |
| 7999936 | NM_003361    | UMOD      | uromodulin                           | -0.029 | 0.980 | 8.32E-01 | 8.32E+01 |  |  |
| 7999999 | ---          | ---       | ---                                  | 0.662  | 1.583 | 1.14E-01 | 1.14E+01 |  |  |
| 8000003 | NM_017736    | THUMPDP1  | THUMP domain containing 1            | 0.054  | 1.038 | 6.06E-01 | 6.06E+01 |  |  |
| 8000028 | NM_173475    | DCUN1D3   | DCN1, defective in cullin neddylat   | -0.163 | 0.893 | 3.32E-01 | 3.32E+01 |  |  |
| 8000117 | NM_001888    | CRYM      | crystallin, mu                       | 0.038  | 1.027 | 7.40E-01 | 7.40E+01 |  |  |
| 8000131 | NM_130464    | NPIPL3    | nuclear pore complex interacting t   | 0.014  | 1.010 | 9.05E-01 | 9.05E+01 |  |  |
| 8000156 | ENST00000446 | SMG1      | SMG1 homolog, phosphatidylinosi      | 0.005  | 1.003 | 9.76E-01 | 9.76E+01 |  |  |
| 8000167 | NM_015092    | SMG1      | SMG1 homolog, phosphatidylinosi      | 0.002  | 1.002 | 9.86E-01 | 9.86E+01 |  |  |
| 8000184 | NM_005849    | IGSF6     | immunoglobulin superfamily, mem      | 0.337  | 1.263 | 3.51E-01 | 3.51E+01 |  |  |
| 8000192 | ENST00000198 | RRN3      | RRN3 RNA polymerase I transcript     | 0.140  | 1.102 | 1.66E-01 | 1.66E+01 |  |  |
| 8000200 | NM_018427    | RRN3      | RRN3 RNA polymerase I transcript     | 0.136  | 1.099 | 3.25E-01 | 3.25E+01 |  |  |
| 8000205 | NM_130464    | NPIPL3    | nuclear pore complex interacting t   | 0.014  | 1.010 | 8.94E-01 | 8.94E+01 |  |  |
| 8000217 | NM_015092    | SMG1      | SMG1 homolog, phosphatidylinosi      | -0.026 | 0.982 | 8.18E-01 | 8.18E+01 |  |  |
| 8000222 | NM_015092    | SMG1      | SMG1 homolog, phosphatidylinosi      | 0.041  | 1.029 | 7.16E-01 | 7.16E+01 |  |  |
| 8000236 | NM_001802    | CDR2      | cerebellar degeneration-related p    | -0.080 | 0.946 | 7.44E-01 | 7.44E+01 |  |  |
| 8000244 | NM_020718    | USP31     | ubiquitin specific peptidase 31      | -0.046 | 0.968 | 7.25E-01 | 7.25E+01 |  |  |
| 8000263 | NM_153603    | COG7      | component of oligomeric golgi cor    | -0.009 | 0.993 | 9.66E-01 | 9.66E+01 |  |  |
| 8000284 | NM_015044    | GGA2      | golgi associated, gamma adaptin e    | 0.056  | 1.040 | 7.63E-01 | 7.63E+01 |  |  |
| 8000310 | NM_00108361  | EARS2     | glutamyl-tRNA synthetase 2, mito     | -0.029 | 0.980 | 8.47E-01 | 8.47E+01 |  |  |
| 8000323 | NM_005003    | NDUFAB1   | NADH dehydrogenase (ubiquinone       | 0.141  | 1.103 | 3.40E-01 | 3.40E+01 |  |  |
| 8000346 | NM_033266    | ERN2      | endoplasmic reticulum to nucleus     | 0.049  | 1.034 | 7.74E-01 | 7.74E+01 |  |  |
| 8000399 | NM_00101298  | ZKSCAN2   | zinc finger with KRAB and SCAN do    | -0.024 | 0.983 | 9.20E-01 | 9.20E+01 |  |  |
| 8000409 | NM_005517    | HMG2      | high-mobility group nucleosomal t    | 0.068  | 1.048 | 6.34E-01 | 6.34E+01 |  |  |
| 8000411 | NM_00114534  | JMJD5     | jumonji domain containing 5          | 0.031  | 1.022 | 9.12E-01 | 9.12E+01 |  |  |
| 8000413 | NM_145080    | NSMCE1    | non-SMC element 1 homolog (S. c      | -0.030 | 0.979 | 9.02E-01 | 9.02E+01 |  |  |
| 8000425 | NM_001520    | GTF3C1    | general transcription factor IIIC, p | -0.098 | 0.935 | 1.70E-01 | 1.70E+01 |  |  |
| 8000467 | NM_00110976  | GSG1L     | GSG1-like                            | -0.010 | 0.993 | 9.56E-01 | 9.56E+01 |  |  |
| 8000480 | ---          | ---       | ---                                  | 0.013  | 1.009 | 9.64E-01 | 9.64E+01 |  |  |
| 8000482 | NM_015171    | XPO6      | exportin 6                           | 0.073  | 1.052 | 5.51E-01 | 5.51E+01 |  |  |
| 8000501 | NR_003610    | PDXDC2    | pyridoxal-dependent decarboxylas     | -0.025 | 0.983 | 8.27E-01 | 8.27E+01 |  |  |
| 8000507 | NM_00103780  | EIF3C     | eukaryotic translation initiation fa | -0.004 | 0.997 | 9.86E-01 | 9.86E+01 |  |  |
| 8000537 | NR_003610    | PDXDC2    | pyridoxal-dependent decarboxylas     | -0.017 | 0.989 | 8.86E-01 | 8.86E+01 |  |  |
| 8000543 | NM_000086    | CLN3      | ceroid-lipofuscinosis, neuronal 3    | 0.022  | 1.015 | 9.03E-01 | 9.03E+01 |  |  |
| 8000567 | NM_145659    | IL27      | interleukin 27                       | 0.075  | 1.053 | 4.73E-01 | 4.73E+01 |  |  |
| 8000574 | NM_00104248  | NUPR1     | nuclear protein, transcriptional re  | 0.102  | 1.073 | 5.91E-01 | 5.91E+01 |  |  |
| 8000582 | NM_001054    | SULT1A2   | sulfotransferase family, cytosolic,  | 0.080  | 1.057 | 6.76E-01 | 6.76E+01 |  |  |
| 8000590 | NM_177534    | SULT1A1   | sulfotransferase family, cytosolic,  | 0.056  | 1.040 | 7.44E-01 | 7.44E+01 |  |  |

|         |                                |                                      |                                                        |        |       |          |          |  |  |
|---------|--------------------------------|--------------------------------------|--------------------------------------------------------|--------|-------|----------|----------|--|--|
| 8000600 | ---                            | ---                                  | ---                                                    | -0.059 | 0.960 | 5.24E-01 | 5.24E+01 |  |  |
| 8000603 | NM_003321                      | TUFM                                 | Tu translation elongation factor, nuclear              | 0.001  | 1.001 | 9.94E-01 | 9.94E+01 |  |  |
| 8000616 | NM_024816                      | RABEP2                               | rabaptin, RAB GTPase binding effector                  | -0.071 | 0.952 | 3.95E-01 | 3.95E+01 |  |  |
| 8000632 | ---                            | ---                                  | ---                                                    | 0.102  | 1.073 | 4.88E-01 | 4.88E+01 |  |  |
| 8000636 | NM_130464                      | NPIPL3                               | nuclear pore complex interacting protein 3             | -0.005 | 0.996 | 9.81E-01 | 9.81E+01 |  |  |
| 8000638 | NM_015092                      | SMG1                                 | SMG1 homolog, phosphatidylinositol 3-kinase            | -0.006 | 0.996 | 9.72E-01 | 9.72E+01 |  |  |
| 8000649 | ---                            | ---                                  | ---                                                    | 0.005  | 1.004 | 9.85E-01 | 9.85E+01 |  |  |
| 8000651 | NM_015092                      | SMG1                                 | SMG1 homolog, phosphatidylinositol 3-kinase            | -0.013 | 0.991 | 8.96E-01 | 8.96E+01 |  |  |
| 8000676 | NM_130464                      | NPIPL3                               | nuclear pore complex interacting protein 3             | 0.009  | 1.006 | 9.44E-01 | 9.44E+01 |  |  |
| 8000687 | NM_015092                      | SMG1                                 | SMG1 homolog, phosphatidylinositol 3-kinase            | -0.014 | 0.990 | 9.60E-01 | 9.60E+01 |  |  |
| 8000690 | ---                            | ---                                  | ---                                                    | 0.005  | 1.004 | 9.85E-01 | 9.85E+01 |  |  |
| 8000692 | NM_00103182                    | BOLA2                                | bolA homolog 2 (E. coli)                               | -0.028 | 0.981 | 7.48E-01 | 7.48E+01 |  |  |
| 8000702 | NM_175900                      | C16orf54                             | chromosome 16 open reading frame 54                    | 0.097  | 1.069 | 1.76E-01 | 1.76E+01 |  |  |
| 8000706 | NM_006319                      | CDIPT                                | CDP-diacylglycerol--inositol 3-phosphate               | -0.011 | 0.992 | 9.63E-01 | 9.63E+01 |  |  |
| 8000716 | NM_012410                      | SEZ6L2                               | seizure related 6 homolog (mouse)                      | -0.023 | 0.984 | 8.50E-01 | 8.50E+01 |  |  |
| 8000738 | NM_178863                      | KCTD13                               | potassium channel tetramerisation domain containing 13 | -0.043 | 0.971 | 7.63E-01 | 7.63E+01 |  |  |
| 8000748 | NM_003609                      | HIRIP3                               | HIRA interacting protein 3                             | -0.001 | 1.000 | 9.98E-01 | 9.98E+01 |  |  |
| 8000757 | NM_003586                      | DOC2A                                | double C2-like domains, alpha                          | -0.013 | 0.991 | 9.27E-01 | 9.27E+01 |  |  |
| 8000772 | NM_031478                      | FAM57B                               | family with sequence similarity 57 member B            | -0.047 | 0.968 | 5.76E-01 | 5.76E+01 |  |  |
| 8000779 | NM_004608                      | TBX6                                 | T-box 6                                                | -0.011 | 0.992 | 9.49E-01 | 9.49E+01 |  |  |
| 8000791 | NM_031477                      | YPEL3                                | yippee-like 3 (Drosophila)                             | -0.023 | 0.984 | 9.43E-01 | 9.43E+01 |  |  |
| 8000799 | NM_024307                      | GDPD3                                | glycerophosphodiester phosphodiesterase 3              | -0.033 | 0.977 | 9.01E-01 | 9.01E+01 |  |  |
| 8000811 | NM_00104005                    | MAPK3                                | mitogen-activated protein kinase 3                     | 0.020  | 1.014 | 9.26E-01 | 9.26E+01 |  |  |
| 8000823 | NM_015092                      | SMG1                                 | SMG1 homolog, phosphatidylinositol 3-kinase            | -0.009 | 0.994 | 9.53E-01 | 9.53E+01 |  |  |
| 8000834 | NM_015092                      | SMG1                                 | SMG1 homolog, phosphatidylinositol 3-kinase            | -0.004 | 0.997 | 9.76E-01 | 9.76E+01 |  |  |
| 8000848 | NM_006110                      | CD2BP2                               | CD2 (cytoplasmic tail) binding protein 2               | -0.056 | 0.962 | 6.94E-01 | 6.94E+01 |  |  |
| 8000856 | NM_015527                      | TBC1D10B                             | TBC1 domain family, member 10B                         | -0.035 | 0.976 | 7.77E-01 | 7.77E+01 |  |  |
| 8000869 | NM_052838                      | 40A22                                | septin 1                                               | 0.061  | 1.044 | 7.03E-01 | 7.03E+01 |  |  |
| 8000882 | ---                            | ---                                  | ---                                                    | -0.046 | 0.968 | 7.52E-01 | 7.52E+01 |  |  |
| 8000884 | NM_024096                      | DCTPP1                               | dCTP pyrophosphatase 1                                 | -0.038 | 0.974 | 7.78E-01 | 7.78E+01 |  |  |
| 8000890 | NM_012248                      | SEPHS2                               | selenophosphate synthetase 2                           | 0.007  | 1.005 | 9.63E-01 | 9.63E+01 |  |  |
| 8000897 | ---                            | ---                                  | ---                                                    | -0.119 | 0.921 | 5.12E-01 | 5.12E+01 |  |  |
| 8000899 | NM_024671                      | ZNF768                               | zinc finger protein 768                                | -0.004 | 0.997 | 9.85E-01 | 9.85E+01 |  |  |
| 8000903 | NM_023931                      | ZNF747                               | zinc finger protein 747                                | -0.033 | 0.978 | 7.87E-01 | 7.87E+01 |  |  |
| 8000906 | NM_033410                      | ZNF764                               | zinc finger protein 764                                | -0.041 | 0.972 | 8.38E-01 | 8.38E+01 |  |  |
| 8000910 | NM_145271                      | ZNF688                               | zinc finger protein 688                                | -0.026 | 0.982 | 8.71E-01 | 8.71E+01 |  |  |
| 8000917 | NM_152458                      | ZNF785                               | zinc finger protein 785                                | 0.039  | 1.028 | 7.61E-01 | 7.61E+01 |  |  |
| 8000924 | NM_138447                      | ZNF689                               | zinc finger protein 689                                | -0.009 | 0.994 | 9.72E-01 | 9.72E+01 |  |  |
| 8000930 | ---                            | ---                                  | ---                                                    | 0.400  | 1.320 | 5.30E-01 | 5.30E+01 |  |  |
| 8000932 | NM_00101497                    | C16orf93                             | chromosome 16 open reading frame 93                    | -0.038 | 0.974 | 7.73E-01 | 7.73E+01 |  |  |
| 8000941 | NM_00108041                    | ZNF629                               | zinc finger protein 629                                | -0.086 | 0.942 | 3.56E-01 | 3.56E+01 |  |  |
| 8000945 | ---                            | ---                                  | ---                                                    | 0.148  | 1.108 | 2.95E-01 | 2.95E+01 |  |  |
| 8000948 | NM_004765                      | BCL7C                                | B-cell CLL/lymphoma 7C                                 | -0.009 | 0.994 | 9.53E-01 | 9.53E+01 |  |  |
| 8000963 | NM_052874                      | STX1B                                | syntaxin 1B                                            | -0.025 | 0.983 | 9.00E-01 | 9.00E+01 |  |  |
| 8000974 | NM_024706                      | ZNF668                               | zinc finger protein 668                                | -0.053 | 0.964 | 6.93E-01 | 6.93E+01 |  |  |
| 8000978 | NM_00103950                    | POL3S                                | polymerase 3                                           | -0.074 | 0.950 | 3.70E-01 | 3.70E+01 |  |  |
| 8000998 | NM_024006                      | VKORC1                               | vitamin K epoxide reductase complex subunit 1          | 0.019  | 1.013 | 9.48E-01 | 9.48E+01 |  |  |
| 8001007 | NM_002773                      | PRSS8                                | protease, serine, 8                                    | 0.020  | 1.014 | 9.02E-01 | 9.02E+01 |  |  |
| 8001014 | NM_173502                      | PRSS36                               | protease, serine, 36                                   | -0.063 | 0.957 | 4.02E-01 | 4.02E+01 |  |  |
| 8001030 | NM_013258                      | PYCARD                               | PYD and CARD domain containing                         | 0.099  | 1.071 | 4.14E-01 | 4.14E+01 |  |  |
| 8001041 | NM_005205                      | COX6A2                               | cytochrome c oxidase subunit VIa                       | -0.028 | 0.981 | 7.97E-01 | 7.97E+01 |  |  |
| 8001046 | NM_00113650                    | ZNF843                               | zinc finger protein 843                                | -0.017 | 0.988 | 9.28E-01 | 9.28E+01 |  |  |
| 8001048 | NM_003041                      | SLC5A2                               | solute carrier family 5 (sodium/glucose)               | 0.006  | 1.004 | 9.74E-01 | 9.74E+01 |  |  |
| 8001067 | NR_002827                      | HERC2P4                              | hect domain and RLD 2 pseudogenes                      | 0.005  | 1.004 | 9.86E-01 | 9.86E+01 |  |  |
| 8001082 | NM_005629                      | SLC6A8                               | solute carrier family 6 (neurotransmitter)             | 0.070  | 1.050 | 3.67E-01 | 3.67E+01 |  |  |
| 8001099 | NR_002827                      | HERC2P4                              | hect domain and RLD 2 pseudogenes                      | -0.011 | 0.992 | 9.73E-01 | 9.73E+01 |  |  |
| 8001102 | ---                            | ---                                  | ---                                                    | 0.248  | 1.188 | 3.68E-03 | 3.68E-01 |  |  |
| 8001108 | AK128823 // #46121 // FLJ46121 | similar to Ig heavy chain V-I region |                                                        | -0.007 | 0.995 | 9.68E-01 | 9.68E+01 |  |  |
| 8001147 | NM_198490                      | RAB43                                | RAB43, member RAS oncogene family                      | -0.009 | 0.994 | 9.73E-01 | 9.73E+01 |  |  |
| 8001149 | NM_018206                      | VPS35                                | vacuolar protein sorting 35 homolog                    | 0.125  | 1.090 | 2.88E-01 | 2.88E+01 |  |  |
| 8001163 | NM_182493                      | MYLK3                                | myosin light chain kinase 3                            | -0.044 | 0.970 | 6.74E-01 | 6.74E+01 |  |  |
| 8001178 | BC056676                       | C16orf87                             | chromosome 16 open reading frame 87                    | 0.135  | 1.098 | 3.10E-01 | 3.10E+01 |  |  |
| 8001185 | NM_005880                      | DNAJA2                               | DnaJ (Hsp40) homolog, subfamily A                      | 0.010  | 1.007 | 9.49E-01 | 9.49E+01 |  |  |
| 8001211 | NM_030790                      | ITFG1                                | integrin alpha FG-GAP repeat containing                | 0.278  | 1.212 | 6.80E-03 | 6.80E-01 |  |  |
| 8001271 | NM_033151                      | ABCC11                               | ATP-binding cassette, sub-family C                     | 0.048  | 1.034 | 6.97E-01 | 6.97E+01 |  |  |
| 8001306 | NM_00100661                    | SIAH1                                | seven in absentia homolog 1 (Drosophila)               | 0.023  | 1.016 | 8.78E-01 | 8.78E+01 |  |  |
| 8001317 | NM_153029                      | N4BP1                                | NEDD4 binding protein 1                                | -0.118 | 0.921 | 5.23E-01 | 5.23E+01 |  |  |
| 8001348 | ---                            | ---                                  | ---                                                    | 0.031  | 1.022 | 9.10E-01 | 9.10E+01 |  |  |
| 8001350 | NM_013263                      | BRD7                                 | bromodomain containing 7                               | -0.069 | 0.953 | 4.74E-01 | 4.74E+01 |  |  |
| 8001371 | ---                            | ---                                  | ---                                                    | 0.108  | 1.078 | 7.18E-01 | 7.18E+01 |  |  |
| 8001373 | NM_153337                      | SNX20                                | sorting nexin 20                                       | 0.089  | 1.064 | 5.05E-01 | 5.05E+01 |  |  |
| 8001387 | NM_002968                      | SALL1                                | sal-like 1 (Drosophila)                                | 0.031  | 1.022 | 8.25E-01 | 8.25E+01 |  |  |
| 8001410 | NM_00101239                    | AKTIP                                | AKT interacting protein                                | 0.156  | 1.114 | 4.68E-01 | 4.68E+01 |  |  |
| 8001449 | NM_024336                      | IRX3                                 | iroquois homeobox 3                                    | -0.031 | 0.979 | 7.97E-01 | 7.97E+01 |  |  |
| 8001455 | ---                            | ---                                  | ---                                                    | -0.007 | 0.995 | 9.76E-01 | 9.76E+01 |  |  |
| 8001457 | NM_00102519                    | CES1                                 | carboxylesterase 1 (monocyte/macrophage)               | -0.527 | 0.694 | 1.09E-01 | 1.09E+01 |  |  |
| 8001464 | NM_00114368                    | CES7                                 | carboxylesterase 7                                     | 0.016  | 1.011 | 9.37E-01 | 9.37E+01 |  |  |

|         |              |          |                                      |        |       |          |          |  |
|---------|--------------|----------|--------------------------------------|--------|-------|----------|----------|--|
| 8001477 | NM_001144    | AMFR     | autocrine motility factor receptor   | 0.028  | 1.020 | 8.47E-01 | 8.47E+01 |  |
| 8001496 | NM_007006    | NUDT21   | nudix (nucleoside diphosphate lin    | 0.050  | 1.035 | 6.98E-01 | 6.98E+01 |  |
| 8001507 | NM_031885    | BBS2     | Bardet-Biedl syndrome 2              | 0.049  | 1.034 | 8.59E-01 | 8.59E+01 |  |
| 8001529 | ---          | ---      | ---                                  | -0.040 | 0.973 | 9.16E-01 | 9.16E+01 |  |
| 8001531 | NM_005950    | MT1G     | metallothionein 1G                   | -0.768 | 0.587 | 6.04E-02 | 6.04E+00 |  |
| 8001537 | NM_024946    | FAM192A  | family with sequence similarity 19   | 0.014  | 1.010 | 9.49E-01 | 9.49E+01 |  |
| 8001547 | NM_015993    | PLLP     | plasma membrane proteolipid (pla     | -0.005 | 0.997 | 9.85E-01 | 9.85E+01 |  |
| 8001552 | NM_020313    | CIAPIN1  | cytokine induced apoptosis inhibit   | 0.139  | 1.101 | 3.93E-01 | 3.93E+01 |  |
| 8001564 | NM_018110    | DOK4     | docking protein 4                    | -0.012 | 0.992 | 9.56E-01 | 9.56E+01 |  |
| 8001576 | NM_033212    | CCDC102A | coiled-coil domain containing 102    | -0.028 | 0.980 | 8.04E-01 | 8.04E+01 |  |
| 8001587 | NM_005550    | KIFC3    | kinesin family member C3             | 0.036  | 1.026 | 7.15E-01 | 7.15E+01 |  |
| 8001615 | NM_001297    | CNGB1    | cyclic nucleotide gated channel be   | -0.021 | 0.986 | 8.63E-01 | 8.63E+01 |  |
| 8001651 | NM_020807    | ZNF319   | zinc finger protein 319              | -0.065 | 0.956 | 6.42E-01 | 6.42E+01 |  |
| 8001658 | NM_013242    | C16orf80 | chromosome 16 open reading fram      | -0.056 | 0.962 | 7.99E-01 | 7.99E+01 |  |
| 8001666 | NM_001896    | CSNK2A2  | casein kinase 2, alpha prime polyp   | -0.047 | 0.968 | 8.04E-01 | 8.04E+01 |  |
| 8001680 | ---          | ---      | ---                                  | -0.006 | 0.996 | 9.77E-01 | 9.77E+01 |  |
| 8001682 | NM_00108049  | KLKBL4   | plasma kallikrein-like protein 4     | 0.015  | 1.011 | 9.28E-01 | 9.28E+01 |  |
| 8001693 | NM_016284    | CNOT1    | CCR4-NOT transcription complex,      | 0.032  | 1.022 | 7.60E-01 | 7.60E+01 |  |
| 8001748 | NR_002980    | SNORA50  | small nucleolar RNA, H/ACA box 5     | 0.347  | 1.272 | 1.99E-01 | 1.99E+01 |  |
| 8001750 | NM_018231    | SLC38A7  | solute carrier family 38, member 7   | 0.085  | 1.060 | 4.59E-01 | 4.59E+01 |  |
| 8001764 | NM_002080    | GOT2     | glutamic-oxaloacetic transaminase    | -0.077 | 0.948 | 6.45E-01 | 6.45E+01 |  |
| 8001776 | ---          | ---      | ---                                  | -0.041 | 0.972 | 8.36E-01 | 8.36E+01 |  |
| 8001782 | NM_002954    | RPS27A   | ribosomal protein S27a               | -0.005 | 0.997 | 9.73E-01 | 9.73E+01 |  |
| 8001816 | ENST00000456 | FLJ27243 | FLJ27243 protein                     | 0.061  | 1.043 | 7.90E-01 | 7.90E+01 |  |
| 8001818 | NM_004614    | TK2      | thymidine kinase 2, mitochondrial    | 0.061  | 1.043 | 8.27E-01 | 8.27E+01 |  |
| 8001830 | NM_181521    | CMTM4    | CKLF-like MARVEL transmembran        | -0.003 | 0.998 | 9.88E-01 | 9.88E+01 |  |
| 8001841 | NM_006141    | DYNC1L12 | dynein, cytoplasmic 1, light interm  | -0.022 | 0.985 | 8.82E-01 | 8.82E+01 |  |
| 8001876 | NM_00101815  | NAE1     | NEDD8 activating enzyme E1 subu      | -0.096 | 0.936 | 5.06E-01 | 5.06E+01 |  |
| 8001898 | NM_004062    | CDH16    | cadherin 16, KSP-cadherin            | -0.068 | 0.954 | 4.68E-01 | 4.68E+01 |  |
| 8001924 | NR_024525    | FAM96B   | family with sequence similarity 96   | -0.032 | 0.978 | 8.49E-01 | 8.49E+01 |  |
| 8001932 | NM_033309    | B3GNT9   | UDP-GlcNAc:betaGal beta-1,3-N-a      | -0.065 | 0.956 | 5.97E-01 | 5.97E+01 |  |
| 8001938 | NM_003789    | TRADD    | TNFRSF1A-associated via death do     | -0.078 | 0.947 | 5.16E-01 | 5.16E+01 |  |
| 8001953 | NM_178516    | EXOC3L   | exocyst complex component 3-like     | -0.088 | 0.941 | 2.91E-01 | 2.91E+01 |  |
| 8001971 | NM_012163    | LRRC29   | leucine rich repeat containing 29    | -0.037 | 0.974 | 7.89E-01 | 7.89E+01 |  |
| 8001981 | NM_013241    | FHOD1    | formin homology 2 domain contai      | -0.046 | 0.969 | 6.69E-01 | 6.69E+01 |  |
| 8002020 | NM_016140    | TPPP3    | tubulin polymerization-promoting     | 0.025  | 1.018 | 8.54E-01 | 8.54E+01 |  |
| 8002029 | NM_013304    | ZDHHC1   | zinc finger, DHHC-type containing    | -0.081 | 0.946 | 3.75E-01 | 3.75E+01 |  |
| 8002041 | NM_004691    | ATP6V0D1 | ATPase, H+ transporting, lysosoma    | 0.276  | 1.210 | 1.41E-01 | 1.41E+01 |  |
| 8002051 | NM_001138    | AGRP     | agouti related protein homolog (n    | 0.039  | 1.027 | 7.08E-01 | 7.08E+01 |  |
| 8002057 | NM_00108248  | ACD      | adrenocortical dysplasia homolog     | -0.081 | 0.945 | 3.70E-01 | 3.70E+01 |  |
| 8002072 | BC008284     | C16orf48 | chromosome 16 open reading fram      | -0.057 | 0.961 | 5.51E-01 | 5.51E+01 |  |
| 8002087 | NM_020850    | RANBP10  | RAN binding protein 10               | 0.076  | 1.054 | 5.29E-01 | 5.29E+01 |  |
| 8002102 | ---          | ---      | ---                                  | 0.044  | 1.031 | 8.69E-01 | 8.69E+01 |  |
| 8002104 | NM_025082    | CENPT    | centromere protein T                 | -0.061 | 0.959 | 5.01E-01 | 5.01E+01 |  |
| 8002121 | NM_001907    | CTRL     | chymotrypsin-like                    | -0.035 | 0.976 | 7.44E-01 | 7.44E+01 |  |
| 8002133 | NM_002801    | PSMB10   | proteasome (prosome, macropain       | 0.062  | 1.044 | 6.67E-01 | 6.67E+01 |  |
| 8002143 | NM_000229    | LCAT     | lecithin-cholesterol acyltransfera   | -0.032 | 0.978 | 7.57E-01 | 7.57E+01 |  |
| 8002152 | NM_005072    | SLC12A4  | solute carrier family 12 (potassium  | 0.127  | 1.092 | 1.41E-01 | 1.41E+01 |  |
| 8002181 | NM_022357    | DPEP3    | dipeptidase 3                        | -0.008 | 0.995 | 9.64E-01 | 9.64E+01 |  |
| 8002194 | NM_022355    | DPEP2    | dipeptidase 2                        | 0.163  | 1.120 | 1.34E-01 | 1.34E+01 |  |
| 8002209 | ---          | ---      | ---                                  | 0.013  | 1.009 | 9.37E-01 | 9.37E+01 |  |
| 8002211 | NM_018380    | DDX28    | DEAD (Asp-Glu-Ala-Asp) box polyp     | 0.096  | 1.069 | 7.19E-01 | 7.19E+01 |  |
| 8002216 | ---          | ---      | ---                                  | 0.117  | 1.085 | 6.23E-01 | 6.23E+01 |  |
| 8002218 | NM_024939    | ESRP2    | epithelial splicing regulatory prote | -0.032 | 0.978 | 8.44E-01 | 8.44E+01 |  |
| 8002237 | NM_032178    | SLC7A6OS | solute carrier family 7, member 6    | -0.077 | 0.948 | 4.35E-01 | 4.35E+01 |  |
| 8002245 | ---          | ---      | ---                                  | -0.098 | 0.934 | 7.57E-01 | 7.57E+01 |  |
| 8002249 | NM_018667    | SMPD3    | sphingomyelin phosphodiesterase      | -0.041 | 0.972 | 7.51E-01 | 7.51E+01 |  |
| 8002262 | ---          | ---      | ---                                  | 0.006  | 1.004 | 9.76E-01 | 9.76E+01 |  |
| 8002266 | NM_00103969  | CHTF8    | CTF8, chromosome transmission f      | -0.001 | 0.999 | 9.95E-01 | 9.95E+01 |  |
| 8002270 | ---          | ---      | ---                                  | -0.136 | 0.910 | 5.33E-01 | 5.33E+01 |  |
| 8002272 | NM_032382    | COG8     | component of oligomeric golgi cor    | -0.028 | 0.981 | 8.17E-01 | 8.17E+01 |  |
| 8002289 | NM_005652    | TERF2    | telomeric repeat binding factor 2    | 0.003  | 1.002 | 9.88E-01 | 9.88E+01 |  |
| 8002301 | ---          | ---      | ---                                  | -0.047 | 0.968 | 8.79E-01 | 8.79E+01 |  |
| 8002312 | NM_014062    | NOB1     | NIN1/RPN12 binding protein 1 ho      | -0.083 | 0.944 | 7.13E-01 | 7.13E+01 |  |
| 8002322 | NR_003610    | PDXDC2   | pyridoxal-dependent decarboxylas     | -0.004 | 0.997 | 9.88E-01 | 9.88E+01 |  |
| 8002333 | NM_015092    | SMG1     | SMG1 homolog, phosphatidylinosi      | 0.002  | 1.001 | 9.89E-01 | 9.89E+01 |  |
| 8002342 | ---          | ---      | ---                                  | -0.014 | 0.990 | 9.64E-01 | 9.64E+01 |  |
| 8002344 | NM_058219    | EXOSC6   | exosome component 6                  | -0.022 | 0.985 | 8.47E-01 | 8.47E+01 |  |
| 8002347 | NM_001605    | AARS     | alanyl-tRNA synthetase               | -0.007 | 0.995 | 9.73E-01 | 9.73E+01 |  |
| 8002370 | NM_006927    | ST3GAL2  | ST3 beta-galactoside alpha-2,3-sia   | -0.038 | 0.974 | 7.94E-01 | 7.94E+01 |  |
| 8002379 | ---          | ---      | ---                                  | 0.031  | 1.021 | 9.56E-01 | 9.56E+01 |  |
| 8002381 | NM_015386    | COG4     | component of oligomeric golgi cor    | 0.059  | 1.042 | 7.95E-01 | 7.95E+01 |  |
| 8002403 | NM_138383    | MTSS1L   | metastasis suppressor 1-like         | 0.000  | 1.000 | 1.00E+00 | 1.00E+02 |  |
| 8002421 | NM_018052    | VAC14    | Vac14 homolog (S. cerevisiae)        | -0.165 | 0.892 | 1.28E-01 | 1.28E+01 |  |
| 8002444 | AK128439     | VAC14    | Vac14 homolog (S. cerevisiae)        | 0.015  | 1.011 | 9.41E-01 | 9.41E+01 |  |
| 8002523 | NM_018348    | FTSJ1    | FtsJ methyltransferase domain cor    | 0.003  | 1.002 | 9.87E-01 | 9.87E+01 |  |
| 8002533 | NM_145911    | ZNF23    | zinc finger protein 23 (KOX 16)      | -0.057 | 0.961 | 5.99E-01 | 5.99E+01 |  |

|         |              |              |                                               |        |       |          |          |  |  |
|---------|--------------|--------------|-----------------------------------------------|--------|-------|----------|----------|--|--|
| 8002547 | NM_006961    | ZNF19        | zinc finger protein 19                        | 0.006  | 1.004 | 9.77E-01 | 9.77E+01 |  |  |
| 8002571 | NM_015020    | PHLPP2       | PH domain and leucine rich repeat             | -0.040 | 0.973 | 8.63E-01 | 8.63E+01 |  |  |
| 8002590 | ---          | ---          | ---                                           | -0.067 | 0.954 | 6.05E-01 | 6.05E+01 |  |  |
| 8002592 | NM_00103000  | AP1G1        | adaptor-related protein complex 1             | 0.030  | 1.021 | 8.63E-01 | 8.63E+01 |  |  |
| 8002618 | NM_017530    | ZNF821       | zinc finger protein 821                       | -0.052 | 0.965 | 7.05E-01 | 7.05E+01 |  |  |
| 8002660 | NM_017853    | TXNL4B       | thioredoxin-like 4B                           | 0.067  | 1.048 | 5.87E-01 | 5.87E+01 |  |  |
| 8002692 | NM_006885    | ZFH3         | zinc finger homeobox 3                        | -0.008 | 0.994 | 9.53E-01 | 9.53E+01 |  |  |
| 8002706 | AK129695     | C16orf47     | chromosome 16 open reading frame              | -0.059 | 0.960 | 6.10E-01 | 6.10E+01 |  |  |
| 8002711 | ---          | ---          | ---                                           | 0.013  | 1.009 | 9.63E-01 | 9.63E+01 |  |  |
| 8002713 | NM_00101188  | CLEC18B      | C-type lectin domain family 18, member        | -0.031 | 0.979 | 7.73E-01 | 7.73E+01 |  |  |
| 8002729 | NR_027264    | GLG1         | golgi apparatus protein 1                     | 0.040  | 1.028 | 7.33E-01 | 7.33E+01 |  |  |
| 8002758 | ---          | ---          | ---                                           | 0.085  | 1.061 | 8.75E-01 | 8.75E+01 |  |  |
| 8002760 | ENST00000412 | LOC100132346 | similar to heat shock 10 kDa protein          | -0.103 | 0.931 | 5.66E-01 | 5.66E+01 |  |  |
| 8002762 | NM_018124    | RFWD3        | ring finger and WD repeat domain              | -0.016 | 0.989 | 9.29E-01 | 9.29E+01 |  |  |
| 8002778 | NM_152649    | MLKL         | mixed lineage kinase domain-like              | -0.234 | 0.850 | 2.57E-01 | 2.57E+01 |  |  |
| 8002792 | NM_024306    | FA2H         | fatty acid 2-hydroxylase                      | -0.065 | 0.956 | 4.42E-01 | 4.42E+01 |  |  |
| 8002802 | NM_030581    | WDR59        | WD repeat domain 59                           | -0.060 | 0.959 | 7.27E-01 | 7.27E+01 |  |  |
| 8002830 | NM_153486    | LDHD         | lactate dehydrogenase D                       | -0.006 | 0.996 | 9.77E-01 | 9.77E+01 |  |  |
| 8002845 | NM_00102520  | CTRB2        | chymotrypsinogen B2                           | -0.042 | 0.972 | 6.30E-01 | 6.30E+01 |  |  |
| 8002854 | NM_014567    | BCAR1        | breast cancer anti-estrogen resistance        | 0.069  | 1.049 | 3.72E-01 | 3.72E+01 |  |  |
| 8002865 | NM_006324    | CFDP1        | craniofacial development protein              | 0.045  | 1.032 | 6.51E-01 | 6.51E+01 |  |  |
| 8002878 | NM_145254    | TMEM170A     | transmembrane protein 170A                    | -0.035 | 0.976 | 8.42E-01 | 8.42E+01 |  |  |
| 8002891 | NM_024533    | CHST5        | carbohydrate (N-acetyl)glucosaminidase        | -0.043 | 0.971 | 8.05E-01 | 8.05E+01 |  |  |
| 8002904 | NM_012091    | ADAT1        | adenosine deaminase, tRNA-specific            | 0.020  | 1.014 | 9.54E-01 | 9.54E+01 |  |  |
| 8002919 | NM_00113008  | KARS         | lysyl-tRNA synthetase                         | 0.117  | 1.084 | 2.78E-01 | 2.78E+01 |  |  |
| 8002937 | ---          | ---          | ---                                           | -0.064 | 0.956 | 5.10E-01 | 5.10E+01 |  |  |
| 8002967 | ---          | ---          | ---                                           | -0.123 | 0.918 | 7.10E-01 | 7.10E+01 |  |  |
| 8002969 | NM_00103180  | MAF          | v-maf musculoaponeurotic fibrosarcoma         | 0.193  | 1.143 | 1.06E-01 | 1.06E+01 |  |  |
| 8002975 | NM_152342    | CDYL2        | chromodomain protein, Y-like 2                | -0.149 | 0.902 | 8.70E-02 | 8.70E+00 |  |  |
| 8002987 | NM_020188    | C16orf61     | chromosome 16 open reading frame              | 0.121  | 1.087 | 3.17E-01 | 3.17E+01 |  |  |
| 8002999 | NM_004483    | GCSH         | glycine cleavage system protein H             | 0.057  | 1.040 | 8.02E-01 | 8.02E+01 |  |  |
| 8003056 | AF220234     | GAF2         | FGF-2 activity-associated protein 2           | 0.009  | 1.006 | 9.73E-01 | 9.73E+01 |  |  |
| 8003066 | ---          | ---          | ---                                           | -0.052 | 0.964 | 8.88E-01 | 8.88E+01 |  |  |
| 8003075 | ---          | ---          | ---                                           | -0.084 | 0.943 | 5.87E-01 | 5.87E+01 |  |  |
| 8003077 | NM_00108044  | SLC38A8      | solute carrier family 38, member 8            | -0.029 | 0.980 | 8.52E-01 | 8.52E+01 |  |  |
| 8003087 | ---          | ---          | ---                                           | 0.182  | 1.134 | 8.19E-02 | 8.19E+00 |  |  |
| 8003089 | NM_003791    | MBTPS1       | membrane-bound transcription factor           | 0.031  | 1.022 | 8.47E-01 | 8.47E+01 |  |  |
| 8003116 | NM_031463    | HSDL1        | hydroxysteroid dehydrogenase like             | 0.047  | 1.033 | 7.75E-01 | 7.75E+01 |  |  |
| 8003125 | NM_005679    | TAF1C        | TATA box binding protein (TBP)-associated     | -0.041 | 0.972 | 7.64E-01 | 7.64E+01 |  |  |
| 8003145 | NM_139174    | ADAD2        | adenosine deaminase domain containing         | 0.180  | 1.133 | 2.93E-01 | 2.93E+01 |  |  |
| 8003149 | NM_172347    | KCNQ4        | potassium voltage-gated channel, member       | 0.004  | 1.003 | 9.78E-01 | 9.78E+01 |  |  |
| 8003156 | ---          | ---          | ---                                           | -0.008 | 0.994 | 9.72E-01 | 9.72E+01 |  |  |
| 8003158 | NM_020947    | KIAA1609     | KIAA1609                                      | -0.008 | 0.995 | 9.73E-01 | 9.73E+01 |  |  |
| 8003171 | NM_021149    | COTL1        | coactosin-like 1 (Dictyostelium)              | 0.291  | 1.223 | 2.68E-03 | 2.68E-01 |  |  |
| 8003180 | NM_00114554  | ZDHHC7       | zinc finger, DHHC-type containing             | 0.100  | 1.072 | 6.17E-01 | 6.17E+01 |  |  |
| 8003193 | BC093665     | FAM92B       | family with sequence similarity 92            | -0.057 | 0.962 | 5.25E-01 | 5.25E+01 |  |  |
| 8003204 | NM_016095    | GINS2        | GINS complex subunit 2 (Psf2 homolog)         | 0.074  | 1.053 | 6.70E-01 | 6.70E+01 |  |  |
| 8003210 | NM_206967    | C16orf74     | chromosome 16 open reading frame              | -0.037 | 0.975 | 7.27E-01 | 7.27E+01 |  |  |
| 8003217 | NM_006067    | COX4NB       | COX4 neighbor                                 | 0.035  | 1.025 | 8.84E-01 | 8.84E+01 |  |  |
| 8003226 | ---          | ---          | ---                                           | -0.082 | 0.945 | 6.66E-01 | 6.66E+01 |  |  |
| 8003233 | NR_027490    | MTHFSD       | methenyltetrahydrofolate synthetase           | -0.038 | 0.974 | 8.48E-01 | 8.48E+01 |  |  |
| 8003243 | AK026130     | FBXO31       | F-box protein 31                              | 0.010  | 1.007 | 9.56E-01 | 9.56E+01 |  |  |
| 8003249 | NM_024735    | FBXO31       | F-box protein 31                              | -0.045 | 0.969 | 7.61E-01 | 7.61E+01 |  |  |
| 8003263 | NM_015144    | ZCCHC14      | zinc finger, CCHC domain containing           | 0.037  | 1.026 | 8.80E-01 | 8.80E+01 |  |  |
| 8003283 | NM_017566    | KLHDC4       | kelch domain containing 4                     | -0.117 | 0.922 | 2.12E-01 | 2.12E+01 |  |  |
| 8003298 | NM_003486    | SLC7A5       | solute carrier family 7 (cationic amino acid) | -0.296 | 0.814 | 1.83E-03 | 1.83E-01 |  |  |
| 8003322 | NM_000101    | CYBA         | cytochrome b-245, alpha polypeptide           | 0.036  | 1.025 | 8.41E-01 | 8.41E+01 |  |  |
| 8003332 | NM_002461    | MVD          | mevalonate (diphospho) decarboxylase          | -0.091 | 0.939 | 2.05E-01 | 2.05E+01 |  |  |
| 8003344 | NM_178310    | SNAI3        | snail homolog 3 (Drosophila)                  | -0.019 | 0.987 | 9.00E-01 | 9.00E+01 |  |  |
| 8003348 | NM_178841    | RNF166       | ring finger protein 166                       | -0.053 | 0.964 | 7.42E-01 | 7.42E+01 |  |  |
| 8003357 | NM_00114286  | FAM38A       | family with sequence similarity 38            | -0.064 | 0.957 | 3.27E-01 | 3.27E+01 |  |  |
| 8003401 | NM_000485    | APRT         | adenine phosphoribosyltransferase             | -0.072 | 0.951 | 4.74E-01 | 4.74E+01 |  |  |
| 8003410 | NM_000512    | GALNS        | galactosamine (N-acetyl)-6-sulfate            | 0.061  | 1.043 | 5.51E-01 | 5.51E+01 |  |  |
| 8003425 | NM_005187    | CBFA2T3      | core-binding factor, runt domain, member      | 0.003  | 1.002 | 9.85E-01 | 9.85E+01 |  |  |
| 8003444 | ENST00000333 | LOC146429    | Putative solute carrier family 22 member      | 0.040  | 1.028 | 8.34E-01 | 8.34E+01 |  |  |
| 8003448 | NM_013275    | ANKRD11      | ankyrin repeat domain 11                      | -0.108 | 0.928 | 1.99E-01 | 1.99E+01 |  |  |
| 8003465 | ---          | ---          | ---                                           | 0.012  | 1.008 | 9.58E-01 | 9.58E+01 |  |  |
| 8003467 | NM_00108331  | CHMP1A       | chromatin modifying protein 1A                | -0.012 | 0.992 | 9.51E-01 | 9.51E+01 |  |  |
| 8003478 | NM_152339    | SPATA2L      | spermatogenesis associated 2-like             | -0.052 | 0.965 | 6.92E-01 | 6.92E+01 |  |  |
| 8003484 | NM_004913    | C16orf7      | chromosome 16 open reading frame              | -0.016 | 0.989 | 9.22E-01 | 9.22E+01 |  |  |
| 8003503 | NM_000135    | FANCA        | Fanconi anemia, complementation group         | -0.011 | 0.992 | 9.37E-01 | 9.37E+01 |  |  |
| 8003553 | NM_145039    | CENPBD1      | CENPB DNA-binding domains containing          | -0.006 | 0.996 | 9.86E-01 | 9.86E+01 |  |  |
| 8003560 | NM_024043    | DBNDD1       | dysbindin (dystrobrevin binding protein)      | -0.043 | 0.971 | 7.03E-01 | 7.03E+01 |  |  |
| 8003583 | NM_007317    | KIF22        | kinesin family member 22                      | 0.017  | 1.012 | 9.16E-01 | 9.16E+01 |  |  |
| 8003601 | NM_175900    | C16orf54     | chromosome 16 open reading frame              | 0.097  | 1.069 | 1.76E-01 | 1.76E+01 |  |  |
| 8003605 | ---          | ---          | ---                                           | -0.131 | 0.913 | 6.78E-01 | 6.78E+01 |  |  |
| 8003607 | NM_00101367  | C17orf97     | chromosome 17 open reading frame              | -0.128 | 0.915 | 4.88E-01 | 4.88E+01 |  |  |

|         |              |                |                                      |        |       |          |          |  |
|---------|--------------|----------------|--------------------------------------|--------|-------|----------|----------|--|
| 8003611 | NM_024792    | FAM57A         | family with sequence similarity 57   | -0.118 | 0.921 | 2.16E-01 | 2.16E+01 |  |
| 8003619 | NR_024120    | ELP2P          | endopeptidase-like peptide 2 pseudo  | -0.050 | 0.966 | 7.94E-01 | 7.94E+01 |  |
| 8003621 | NM_018146    | RNMTL1         | RNA methyltransferase like 1         | -0.037 | 0.975 | 8.27E-01 | 8.27E+01 |  |
| 8003627 | NM_013337    | TIMM22         | translocase of inner mitochondrial   | 0.055  | 1.039 | 7.60E-01 | 7.60E+01 |  |
| 8003633 | ENST00000391 | BHLHA9         | basic helix-loop-helix family, mem   | -0.047 | 0.968 | 8.46E-01 | 8.46E+01 |  |
| 8003635 | NM_172367    | TUSC5          | tumor suppressor candidate 5         | -0.007 | 0.995 | 9.76E-01 | 9.76E+01 |  |
| 8003639 | BC092513     | WDR81          | WD repeat domain 81                  | 0.040  | 1.028 | 7.51E-01 | 7.51E+01 |  |
| 8003656 | NM_000934    | SERPINF2       | serpin peptidase inhibitor, clade F  | -0.006 | 0.996 | 9.77E-01 | 9.77E+01 |  |
| 8003679 | NM_002945    | RPA1           | replication protein A1, 70kDa        | -0.039 | 0.974 | 7.97E-01 | 7.97E+01 |  |
| 8003700 | NM_001383    | DPH1           | DPH1 homolog (S. cerevisiae)         | -0.027 | 0.982 | 8.30E-01 | 8.30E+01 |  |
| 8003719 | NM_00109820  | HIC1           | hypermethylated in cancer 1          | -0.066 | 0.956 | 5.13E-01 | 5.13E+01 |  |
| 8003722 | NM_021947    | SRR            | serine racemase                      | -0.016 | 0.989 | 9.37E-01 | 9.37E+01 |  |
| 8003733 | NM_014853    | SGSM2          | small G protein signaling modulat    | -0.004 | 0.997 | 9.77E-01 | 9.77E+01 |  |
| 8003758 | NM_000430    | PAFAH1B1       | platelet-activating factor acetylhyd | -0.030 | 0.979 | 8.06E-01 | 8.06E+01 |  |
| 8003769 | ---          | ---            | ---                                  | 0.147  | 1.107 | 7.27E-01 | 7.27E+01 |  |
| 8003771 | ---          | ---            | ---                                  | -0.051 | 0.965 | 7.55E-01 | 7.55E+01 |  |
| 8003773 | NM_015085    | GARNL4         | GTPase activating Rap/RanGAP do      | 0.011  | 1.007 | 9.52E-01 | 9.52E+01 |  |
| 8003800 | ---          | ---            | ---                                  | -0.066 | 0.955 | 5.89E-01 | 5.89E+01 |  |
| 8003804 | NM_014565    | OR1A1          | olfactory receptor, family 1, subfa  | -0.100 | 0.933 | 4.20E-01 | 4.20E+01 |  |
| 8003806 | NM_003552    | OR1D4          | olfactory receptor, family 1, subfa  | 0.000  | 1.000 | 1.00E+00 | 1.00E+02 |  |
| 8003810 | ---          | ---            | ---                                  | -0.145 | 0.904 | 1.59E-01 | 1.59E+01 |  |
| 8003812 | NM_012373    | OR3A3          | olfactory receptor, family 3, subfa  | -0.032 | 0.978 | 9.11E-01 | 9.11E+01 |  |
| 8003824 | NM_004937    | CTNS           | cystinosis, nephropathic             | 0.311  | 1.240 | 1.42E-01 | 1.42E+01 |  |
| 8003840 | NM_00101476  | TMEM93         | transmembrane protein 93             | -0.046 | 0.968 | 7.15E-01 | 7.15E+01 |  |
| 8003844 | NM_031965    | GSG2           | germ cell associated 2 (haspin)      | 0.032  | 1.023 | 9.04E-01 | 9.04E+01 |  |
| 8003846 | NM_015113    | ZZEF1          | zinc finger, ZZ-type with EF-hand d  | -0.015 | 0.989 | 9.24E-01 | 9.24E+01 |  |
| 8003848 | ---          | ---            | ---                                  | 0.039  | 1.027 | 9.60E-01 | 9.60E+01 |  |
| 8003850 | NM_144611    | CYB5D2         | cytochrome b5 domain containing      | -0.059 | 0.960 | 6.11E-01 | 6.11E+01 |  |
| 8003857 | ---          | ---            | ---                                  | 0.142  | 1.103 | 4.27E-01 | 4.27E+01 |  |
| 8003859 | ---          | ---            | ---                                  | 0.064  | 1.045 | 8.86E-01 | 8.86E+01 |  |
| 8003861 | NM_182538    | SPNS3          | spinster homolog 3 (Drosophila)      | -0.015 | 0.989 | 9.31E-01 | 9.31E+01 |  |
| 8003875 | NM_00112475  | SPNS2          | spinster homolog 2 (Drosophila)      | -0.049 | 0.967 | 6.38E-01 | 6.38E+01 |  |
| 8003892 | NM_00111497  | SMTNL2         | smoothelin-like 2                    | -0.042 | 0.972 | 6.52E-01 | 6.52E+01 |  |
| 8003903 | NM_004313    | ARRB2          | arrestin, beta 2                     | 0.204  | 1.151 | 1.76E-01 | 1.76E+01 |  |
| 8003922 | NM_00100168  | MED11          | mediator complex subunit 11          | 0.018  | 1.013 | 9.49E-01 | 9.49E+01 |  |
| 8003926 | NM_00113604  | ZMYND15        | zinc finger, MYND-type containing    | 0.027  | 1.019 | 8.63E-01 | 8.63E+01 |  |
| 8003939 | NM_003963    | TM4SF5         | transmembrane 4 L six family mem     | -0.043 | 0.971 | 6.99E-01 | 6.99E+01 |  |
| 8003948 | NM_00101498  | GLTPD2         | glycolipid transfer protein domain   | -0.102 | 0.932 | 2.01E-01 | 2.01E+01 |  |
| 8003953 | NM_002798    | PSMB6          | proteasome (prosome, macropain       | 0.011  | 1.007 | 9.75E-01 | 9.75E+01 |  |
| 8003962 | NM_002663    | PLD2           | phospholipase D2                     | -0.168 | 0.890 | 9.17E-02 | 9.17E+00 |  |
| 8003991 | NM_153827    | MINK1          | misshapen-like kinase 1 (zebrafish   | -0.033 | 0.978 | 8.44E-01 | 8.44E+01 |  |
| 8004024 | NM_000173    | GP1BA          | glycoprotein Ib (platelet), alpha p  | 0.031  | 1.021 | 8.98E-01 | 8.98E+01 |  |
| 8004030 | NM_015528    | RNF167         | ring finger protein 167              | -0.050 | 0.966 | 7.50E-01 | 7.50E+01 |  |
| 8004043 | NM_001976    | ENO3           | enolase 3 (beta, muscle)             | -0.018 | 0.988 | 9.54E-01 | 9.54E+01 |  |
| 8004057 | NM_006612    | KIF1C          | kinesin family member 1C             | 0.036  | 1.025 | 8.46E-01 | 8.46E+01 |  |
| 8004081 | NM_153018    | ZFP3           | zinc finger protein 3 homolog (mo    | 0.075  | 1.054 | 6.59E-01 | 6.59E+01 |  |
| 8004111 | NM_004703    | RABEP1         | rabaptin, RAB GTPase binding effe    | 0.028  | 1.019 | 8.47E-01 | 8.47E+01 |  |
| 8004133 | NR_027680    | RPAIN          | RPA interacting protein              | -0.001 | 0.999 | 9.98E-01 | 9.98E+01 |  |
| 8004144 | NM_024039    | MIS12          | MIS12, MIND kinetochore comple       | -0.077 | 0.948 | 4.00E-01 | 4.00E+01 |  |
| 8004152 | NM_015253    | WSCD1          | WSC domain containing 1              | 0.012  | 1.008 | 9.36E-01 | 9.36E+01 |  |
| 8004175 | NM_032731    | TXNDC17        | thioredoxin domain containing 17     | 0.095  | 1.068 | 5.67E-01 | 5.67E+01 |  |
| 8004184 | NM_017523    | XAF1           | XIAP associated factor 1             | 0.174  | 1.128 | 5.97E-01 | 5.97E+01 |  |
| 8004195 | NM_153230    | FBXO39         | F-box protein 39                     | -0.019 | 0.987 | 9.46E-01 | 9.46E+01 |  |
| 8004201 | NR_002710    | ALOX12P2       | arachidonate 12-lipoxygenase pse     | -0.055 | 0.962 | 6.06E-01 | 6.06E+01 |  |
| 8004219 | ---          | ---            | ---                                  | 0.111  | 1.080 | 8.65E-01 | 8.65E+01 |  |
| 8004221 | NM_000697    | ALOX12         | arachidonate 12-lipoxygenase         | 0.017  | 1.012 | 9.43E-01 | 9.43E+01 |  |
| 8004237 | NM_00100433  | RNASEK         | ribonuclease, RNase K                | 0.091  | 1.065 | 5.66E-01 | 5.66E+01 |  |
| 8004241 | NM_00100433  | RNASEK         | ribonuclease, RNase K                | 0.013  | 1.009 | 9.46E-01 | 9.46E+01 |  |
| 8004247 | NM_00114279  | C17orf49       | chromosome 17 open reading fram      | -0.198 | 0.872 | 3.47E-02 | 3.47E+00 |  |
| 8004255 | NM_181844    | BCL6B          | B-cell CLL/lymphoma 6, member B      | -0.021 | 0.985 | 9.21E-01 | 9.21E+01 |  |
| 8004266 | NM_001566    | SLC16A13       | solute carrier family 16, member 1   | 0.057  | 1.040 | 7.61E-01 | 7.61E+01 |  |
| 8004271 | NM_000018    | ACADVL         | acyl-Coenzyme A dehydrogenase,       | -0.043 | 0.971 | 8.79E-01 | 8.79E+01 |  |
| 8004293 | NM_003413    | C17orf81       | chromosome 17 open reading fram      | 0.025  | 1.017 | 8.53E-01 | 8.53E+01 |  |
| 8004309 | NM_001042    | SLC2A4         | solute carrier family 2 (facilitate  | 0.049  | 1.034 | 7.07E-01 | 7.07E+01 |  |
| 8004325 | NM_00114376  | EIF5A          | eukaryotic translation initiation fa | -0.045 | 0.969 | 8.31E-01 | 8.31E+01 |  |
| 8004331 | NM_014716    | ACAP1          | ArfGAP with coiled-coil, ankyrin re  | -0.022 | 0.985 | 8.77E-01 | 8.77E+01 |  |
| 8004360 | NM_00100291  | KCTD11         | potassium channel tetramerisatio     | -0.014 | 0.991 | 9.54E-01 | 9.54E+01 |  |
| 8004372 | NM_003985    | TNK1           | tyrosine kinase, non-receptor, 1     | -0.058 | 0.961 | 6.31E-01 | 6.31E+01 |  |
| 8004385 | NM_020795    | NLGN2          | neuroligin 2                         | -0.033 | 0.977 | 7.87E-01 | 7.87E+01 |  |
| 8004394 | NM_199339    | SPEM1          | spermatid maturation 1               | 0.017  | 1.012 | 9.44E-01 | 9.44E+01 |  |
| 8004400 | NM_175734    | C17orf74       | chromosome 17 open reading fram      | -0.062 | 0.958 | 5.69E-01 | 5.69E+01 |  |
| 8004404 | NM_178518    | TMEM102        | transmembrane protein 102            | 0.003  | 1.002 | 9.90E-01 | 9.90E+01 |  |
| 8004416 | NM_000747    | CHRNB1         | cholinergic receptor, nicotinic, bet | 0.001  | 1.001 | 9.96E-01 | 9.96E+01 |  |
| 8004428 | NM_00110261  | AMAC1L3        | acyl-malonyl condensing enzyme 3     | -0.012 | 0.992 | 9.40E-01 | 9.40E+01 |  |
| 8004431 | NM_000937    | POLR2A         | polymerase (RNA) II (DNA directe     | -0.114 | 0.924 | 2.35E-01 | 2.35E+01 |  |
| 8004464 | NM_172089    | NFSF12-TNFSF13 | TNFSF12-TNFSF13 readthrough tra      | -0.094 | 0.937 | 2.75E-01 | 2.75E+01 |  |
| 8004485 | NM_015670    | SEN3           | SUMO1/sentrin/SMT3 specific peg      | -0.026 | 0.982 | 8.64E-01 | 8.64E+01 |  |

|         |               |            |                                      |        |       |          |          |  |  |
|---------|---------------|------------|--------------------------------------|--------|-------|----------|----------|--|--|
| 8004497 | NM_001416     | EIF4A1     | eukaryotic translation initiation fa | 0.004  | 1.002 | 9.89E-01 | 9.89E+01 |  |  |
| 8004506 | NR_002918     | SNORA48    | small nucleolar RNA, H/ACA box 4     | -0.054 | 0.964 | 7.98E-01 | 7.98E+01 |  |  |
| 8004508 | NR_002912     | SNORA67    | small nucleolar RNA, H/ACA box 6     | -0.131 | 0.913 | 5.63E-01 | 5.63E+01 |  |  |
| 8004510 | NM_001251     | CD68       | CD68 molecule                        | 0.532  | 1.446 | 7.22E-02 | 7.22E+00 |  |  |
| 8004521 | NR_024603     | MPDU1      | mannose-P-dolichol utilization def   | 0.121  | 1.087 | 5.53E-01 | 5.53E+01 |  |  |
| 8004534 | NM_001040     | SHBG       | sex hormone-binding globulin         | 0.045  | 1.032 | 7.56E-01 | 7.56E+01 |  |  |
| 8004545 | NM_001678     | ATP1B2     | ATPase, Na+/K+ transporting, beta    | -0.094 | 0.937 | 3.38E-01 | 3.38E+01 |  |  |
| 8004556 | NM_018081     | WRAP53     | WD repeat containing, antisense t    | -0.094 | 0.937 | 3.70E-01 | 3.70E+01 |  |  |
| 8004671 | NM_00108042   | KDM6B      | lysine (K)-specific demethylase 6B   | -0.150 | 0.901 | 4.01E-02 | 4.01E+00 |  |  |
| 8004691 | NM_203411     | TMEM88     | transmembrane protein 88             | -0.046 | 0.969 | 7.68E-01 | 7.68E+01 |  |  |
| 8004694 | NM_144607     | CYB5D1     | cytochrome b5 domain containing      | -0.105 | 0.930 | 5.46E-01 | 5.46E+01 |  |  |
| 8004699 | NM_00100527   | CHD3       | chromodomain helicase DNA bind       | -0.110 | 0.926 | 3.77E-01 | 3.77E+01 |  |  |
| 8004741 | NM_00103714   | CNTR0B     | centrobin, centrosomal BRCA2 int     | -0.068 | 0.954 | 5.12E-01 | 5.12E+01 |  |  |
| 8004763 | NM_000180     | GUCY2D     | guanylate cyclase 2D, membrane       | -0.060 | 0.959 | 4.29E-01 | 4.29E+01 |  |  |
| 8004784 | NM_001141     | ALOX15B    | arachidonate 15-lipoxygenase, typ    | -0.049 | 0.967 | 6.38E-01 | 6.38E+01 |  |  |
| 8004802 | NM_017622     | C17orf59   | chromosome 17 open reading fram      | -0.073 | 0.951 | 5.10E-01 | 5.10E+01 |  |  |
| 8004804 | NM_012393     | PFAS       | phosphoribosylformylglycinamidir     | -0.066 | 0.955 | 4.62E-01 | 4.62E+01 |  |  |
| 8004832 | NM_201520     | SLC25A35   | solute carrier family 25, member 3   | -0.042 | 0.971 | 7.61E-01 | 7.61E+01 |  |  |
| 8004842 | NM_173728     | ARHGEF15   | Rho guanine nucleotide exchange      | -0.009 | 0.994 | 9.49E-01 | 9.49E+01 |  |  |
| 8004867 | NM_00102557   | NDEL1      | nudE nuclear distribution gene E H   | -0.015 | 0.990 | 9.28E-01 | 9.28E+01 |  |  |
| 8004880 | NM_004822     | NTN1       | netrin 1                             | -0.010 | 0.993 | 9.56E-01 | 9.56E+01 |  |  |
| 8004905 | NM_153210     | USP43      | ubiquitin specific peptidase 43      | -0.050 | 0.966 | 6.43E-01 | 6.43E+01 |  |  |
| 8004940 | NM_020233     | C17orf48   | chromosome 17 open reading fram      | 0.125  | 1.091 | 5.29E-01 | 5.29E+01 |  |  |
| 8004946 | ---           | ---        | ---                                  | -0.047 | 0.968 | 6.99E-01 | 6.99E+01 |  |  |
| 8005029 | NM_003010     | MAP2K4     | mitogen-activated protein kinase     | 0.087  | 1.062 | 5.67E-01 | 5.67E+01 |  |  |
| 8005089 | NM_001303     | COX10      | COX10 homolog, cytochrome c ox       | -0.012 | 0.992 | 9.54E-01 | 9.54E+01 |  |  |
| 8005097 | NM_006041     | HS3ST3B1   | heparan sulfate (glucosamine) 3-C    | -0.360 | 0.779 | 1.58E-01 | 1.58E+01 |  |  |
| 8005110 | NM_020652     | ZNF286A    | zinc finger protein 286A             | -0.091 | 0.939 | 5.08E-01 | 5.08E+01 |  |  |
| 8005117 | NM_178571     | TBC1D26    | TBC1 domain family, member 26        | 0.011  | 1.008 | 9.63E-01 | 9.63E+01 |  |  |
| 8005132 | NR_002211     | MEIS3P1    | Meis homeobox 3 pseudogene 1         | 0.011  | 1.008 | 9.50E-01 | 9.50E+01 |  |  |
| 8005134 | NM_000676     | ADORA2B    | adenosine A2b receptor               | 0.064  | 1.045 | 6.82E-01 | 6.82E+01 |  |  |
| 8005141 | NM_017775     | TTC19      | tetratricopeptide repeat domain 1    | -0.001 | 0.999 | 9.98E-01 | 9.98E+01 |  |  |
| 8005155 | ---           | ---        | ---                                  | 0.018  | 1.012 | 9.57E-01 | 9.57E+01 |  |  |
| 8005157 | NM_004278     | PIGL       | phosphatidylinositol glycan ancho    | 0.037  | 1.026 | 8.63E-01 | 8.63E+01 |  |  |
| 8005166 | NM_018955     | UBB        | ubiquitin B                          | 0.081  | 1.058 | 5.01E-01 | 5.01E+01 |  |  |
| 8005171 | NM_016113     | TRPV2      | transient receptor potential cation  | 0.122  | 1.088 | 3.37E-01 | 3.37E+01 |  |  |
| 8005191 | BC027986      | NCRNA00188 | non-protein coding RNA 188           | 0.006  | 1.004 | 9.83E-01 | 9.83E+01 |  |  |
| 8005200 | NR_003043     | SNORD49B   | small nucleolar RNA, C/D box 49B     | 0.077  | 1.055 | 8.50E-01 | 8.50E+01 |  |  |
| 8005202 | NR_002744     | SNORD49A   | small nucleolar RNA, C/D box 49A     | 0.051  | 1.036 | 9.00E-01 | 9.00E+01 |  |  |
| 8005231 | NR_026809     | FAM106A    | family with sequence similarity 10   | 0.036  | 1.025 | 9.10E-01 | 9.10E+01 |  |  |
| 8005235 | NM_201274     | MPRIIP     | myosin phosphatase Rho interacti     | -0.060 | 0.959 | 7.42E-01 | 7.42E+01 |  |  |
| 8005245 | ---           | ---        | ---                                  | 0.084  | 1.060 | 6.35E-01 | 6.35E+01 |  |  |
| 8005247 | NM_020201     | NTSM       | 5',3'-nucleotidase, mitochondrial    | -0.055 | 0.963 | 5.72E-01 | 5.72E+01 |  |  |
| 8005260 | NM_018019     | MED9       | mediator complex subunit 9           | -0.036 | 0.975 | 6.72E-01 | 6.72E+01 |  |  |
| 8005267 | NM_030665     | RAI1       | retinoic acid induced 1              | -0.031 | 0.979 | 7.73E-01 | 7.73E+01 |  |  |
| 8005289 | NM_00113009   | LRRC48     | leucine rich repeat containing 48    | -0.069 | 0.953 | 7.19E-01 | 7.19E+01 |  |  |
| 8005305 | NM_024052     | C17orf39   | chromosome 17 open reading fram      | -0.019 | 0.987 | 9.48E-01 | 9.48E+01 |  |  |
| 8005313 | NM_001388     | DRG2       | developmentally regulated GTP bi     | 0.058  | 1.041 | 6.35E-01 | 6.35E+01 |  |  |
| 8005328 | NM_016239     | MYO15A     | myosin XVA                           | -0.008 | 0.995 | 9.53E-01 | 9.53E+01 |  |  |
| 8005399 | NM_017758     | ALKBH5     | alkB, alkylation repair homolog 5    | 0.015  | 1.010 | 9.09E-01 | 9.09E+01 |  |  |
| 8005407 | NM_004140     | LLGL1      | lethal giant larvae homolog 1 (Dro   | -0.048 | 0.967 | 5.90E-01 | 5.90E+01 |  |  |
| 8005433 | ---           | ---        | ---                                  | -0.021 | 0.986 | 9.03E-01 | 9.03E+01 |  |  |
| 8005435 | NM_148886     | SMCR7      | Smith-Magenis syndrome chromo        | -0.059 | 0.960 | 3.79E-01 | 3.79E+01 |  |  |
| 8005441 | NM_144775     | SMCR8      | Smith-Magenis syndrome chromo        | -0.025 | 0.983 | 8.78E-01 | 8.78E+01 |  |  |
| 8005444 | ENST00000407  | FLJ35934   | FLJ35934 protein                     | -0.105 | 0.930 | 6.23E-01 | 6.23E+01 |  |  |
| 8005446 | AK127974      | LOC339240  | keratin pseudogene                   | 0.020  | 1.014 | 9.42E-01 | 9.42E+01 |  |  |
| 8005449 | NM_000422     | KRT17      | keratin 17                           | -0.022 | 0.985 | 8.79E-01 | 8.79E+01 |  |  |
| 8005471 | NM_001031     | RPS28      | ribosomal protein S28                | 0.079  | 1.056 | 6.19E-01 | 6.19E+01 |  |  |
| 8005473 | NM_006451     | PAIP1      | poly(A) binding protein interacting  | 0.073  | 1.052 | 8.04E-01 | 8.04E+01 |  |  |
| 8005501 | NM_00113503   | FAM18B2    | family with sequence similarity 18   | 0.030  | 1.021 | 8.84E-01 | 8.84E+01 |  |  |
| 8005512 | NM_002767     | PRPSAP2    | phosphoribosyl pyrophosphate sy      | 0.128  | 1.093 | 3.41E-01 | 3.41E+01 |  |  |
| 8005529 | NM_152351     | SLC5A10    | solute carrier family 5 (sodium/glu  | -0.041 | 0.972 | 6.66E-01 | 6.66E+01 |  |  |
| 8005547 | NR_006880     | SNORD3A    | small nucleolar RNA, C/D box 3A      | -0.508 | 0.703 | 8.15E-02 | 8.15E+00 |  |  |
| 8005549 | ENST000000284 | GRAP       | GRB2-related adaptor protein         | 0.005  | 1.003 | 9.86E-01 | 9.86E+01 |  |  |
| 8005553 | NR_006880     | SNORD3A    | small nucleolar RNA, C/D box 3A      | -0.508 | 0.703 | 8.15E-02 | 8.15E+00 |  |  |
| 8005555 | AK026312      | LOC79999   | hypothetical LOC79999                | -0.049 | 0.966 | 6.31E-01 | 6.31E+01 |  |  |
| 8005557 | NM_014964     | EPN2       | epsin 2                              | -0.074 | 0.950 | 4.42E-01 | 4.42E+01 |  |  |
| 8005574 | ---           | ---        | ---                                  | -0.047 | 0.968 | 8.58E-01 | 8.58E+01 |  |  |
| 8005576 | NM_139033     | MAPK7      | mitogen-activated protein kinase     | -0.004 | 0.997 | 9.85E-01 | 9.85E+01 |  |  |
| 8005601 | ---           | ---        | ---                                  | -0.079 | 0.947 | 3.50E-01 | 3.50E+01 |  |  |
| 8005603 | NM_018242     | SLC47A1    | solute carrier family 47, member 1   | -0.009 | 0.994 | 9.63E-01 | 9.63E+01 |  |  |
| 8005628 | ---           | ---        | ---                                  | -0.061 | 0.959 | 7.94E-01 | 7.94E+01 |  |  |
| 8005638 | NM_00103180   | ALDH3A2    | aldehyde dehydrogenase 3 family,     | 0.061  | 1.043 | 7.11E-01 | 7.11E+01 |  |  |
| 8005657 | ---           | ---        | ---                                  | 0.077  | 1.054 | 8.21E-01 | 8.21E+01 |  |  |
| 8005661 | NM_00103355   | CYTSB      | cytospin B                           | 0.115  | 1.083 | 2.69E-01 | 2.69E+01 |  |  |
| 8005679 | NR_023380     | CCDC144C   | coiled-coil domain containing 144    | -0.009 | 0.994 | 9.77E-01 | 9.77E+01 |  |  |
| 8005687 | NR_026809     | FAM106A    | family with sequence similarity 10   | 0.002  | 1.002 | 9.96E-01 | 9.96E+01 |  |  |

|         |              |           |                                      |        |       |          |          |  |
|---------|--------------|-----------|--------------------------------------|--------|-------|----------|----------|--|
| 8005689 | NR_003554    | LOC220594 | TL132 protein                        | 0.053  | 1.037 | 8.85E-01 | 8.85E+01 |  |
| 8005695 | NR_002211    | MEIS3P1   | Meis homeobox 3 pseudogene 1         | -0.005 | 0.997 | 9.75E-01 | 9.75E+01 |  |
| 8005699 | NM_015510    | DHRS7B    | dehydrogenase/reductase (SDR fa      | -0.083 | 0.944 | 5.38E-01 | 5.38E+01 |  |
| 8005707 | NM_002756    | MAP2K3    | mitogen-activated protein kinase     | -0.079 | 0.947 | 4.04E-01 | 4.04E+01 |  |
| 8005726 | NM_021012    | KCNJ12    | potassium inwardly-rectifying cha    | -0.032 | 0.978 | 7.89E-01 | 7.89E+01 |  |
| 8005733 | NR_003678    | C20orf191 | nuclear receptor co-repressor 1 ps   | 0.062  | 1.044 | 7.76E-01 | 7.76E+01 |  |
| 8005736 | ---          | ---       | ---                                  | 0.025  | 1.018 | 8.64E-01 | 8.64E+01 |  |
| 8005739 | BC031617     | FAM27L    | family with sequence similarity 27   | 0.014  | 1.010 | 9.52E-01 | 9.52E+01 |  |
| 8005751 | ---          | ---       | ---                                  | 0.001  | 1.000 | 9.99E-01 | 9.99E+01 |  |
| 8005753 | ---          | ---       | ---                                  | -0.050 | 0.966 | 8.37E-01 | 8.37E+01 |  |
| 8005765 | NM_015626    | WSB1      | WD repeat and SOCS box-containi      | 0.139  | 1.101 | 1.36E-01 | 1.36E+01 |  |
| 8005777 | BC112354     | LOC440419 | similar to ubiquitin specific protea | -0.020 | 0.986 | 8.83E-01 | 8.83E+01 |  |
| 8005785 | NM_014238    | KSR1      | kinase suppressor of ras 1           | -0.026 | 0.982 | 9.08E-01 | 9.08E+01 |  |
| 8005809 | NM_009587    | LGALS9    | lectin, galactoside-binding, soluble | 0.559  | 1.473 | 5.63E-02 | 5.63E+00 |  |
| 8005814 | NM_016231    | NLK       | nemo-like kinase                     | 0.116  | 1.084 | 1.54E-01 | 1.54E+01 |  |
| 8005833 | NR_003064    | PYY2      | peptide YY, 2 (seminalplasmin)       | -0.038 | 0.974 | 7.40E-01 | 7.40E+01 |  |
| 8005839 | NM_014573    | TMEM97    | transmembrane protein 97             | 0.001  | 1.001 | 9.97E-01 | 9.97E+01 |  |
| 8005847 | NM_021137    | TNFAIP1   | tumor necrosis factor, alpha-induc   | -0.130 | 0.914 | 2.61E-01 | 2.61E+01 |  |
| 8005857 | NM_152464    | TMEM199   | transmembrane protein 199            | 0.129  | 1.094 | 3.67E-01 | 3.67E+01 |  |
| 8005865 | NM_015077    | SARM1     | sterile alpha and TIR motif contain  | -0.049 | 0.967 | 6.58E-01 | 6.58E+01 |  |
| 8005879 | NR_027384    | SLC13A2   | solute carrier family 13 (sodium-d   | -0.015 | 0.989 | 9.02E-01 | 9.02E+01 |  |
| 8005903 | NM_003170    | SUPT6H    | suppressor of Ty 6 homolog (S. cer   | -0.114 | 0.924 | 1.90E-01 | 1.90E+01 |  |
| 8005943 | NM_000984    | RPL23A    | ribosomal protein L23a               | -0.020 | 0.986 | 8.68E-01 | 8.68E+01 |  |
| 8005951 | NR_000013    | SNORD42B  | small nucleolar RNA, C/D box 42B     | -0.086 | 0.942 | 8.88E-01 | 8.88E+01 |  |
| 8005955 | NR_000014    | SNORD42A  | small nucleolar RNA, C/D box 42A     | 0.045  | 1.032 | 9.30E-01 | 9.30E+01 |  |
| 8005957 | NR_000009    | SNORD4B   | small nucleolar RNA, C/D box 4B      | -0.019 | 0.987 | 9.77E-01 | 9.77E+01 |  |
| 8005959 | NM_178170    | NEK8      | NIMA (never in mitosis gene a)- re   | 0.021  | 1.015 | 9.02E-01 | 9.02E+01 |  |
| 8005978 | NM_004295    | TRAF4     | TNF receptor-associated factor 4     | -0.108 | 0.928 | 2.60E-02 | 2.60E+00 |  |
| 8005994 | NM_005702    | ERAL1     | Era G-protein-like 1 (E. coli)       | 0.022  | 1.015 | 9.27E-01 | 9.27E+01 |  |
| 8006005 | NM_016518    | PIPOX     | pipecolic acid oxidase               | -0.016 | 0.989 | 9.04E-01 | 9.04E+01 |  |
| 8006019 | NM_005208    | CRYBA1    | crystallin, beta A1                  | 0.021  | 1.015 | 9.36E-01 | 9.36E+01 |  |
| 8006028 | ---          | ---       | ---                                  | 0.232  | 1.175 | 4.71E-01 | 4.71E+01 |  |
| 8006030 | NM_020791    | TAOK1     | TAO kinase 1                         | -0.007 | 0.995 | 9.73E-01 | 9.73E+01 |  |
| 8006052 | NM_138349    | TP53I13   | tumor protein p53 inducible prote    | 0.012  | 1.008 | 9.33E-01 | 9.33E+01 |  |
| 8006063 | NM_152345    | ANKRD13B  | ankyrin repeat domain 13B            | -0.038 | 0.974 | 8.05E-01 | 8.05E+01 |  |
| 8006081 | ---          | ---       | ---                                  | 0.133  | 1.096 | 5.44E-01 | 5.44E+01 |  |
| 8006112 | NM_032141    | CCDC55    | coiled-coil domain containing 55     | -0.007 | 0.995 | 9.66E-01 | 9.66E+01 |  |
| 8006119 | ---          | ---       | ---                                  | 0.000  | 1.000 | 1.00E+00 | 1.00E+02 |  |
| 8006123 | NM_001304    | CPD       | carboxypeptidase D                   | -0.227 | 0.855 | 1.65E-01 | 1.65E+01 |  |
| 8006148 | NM_004871    | GOSR1     | golgi SNAP receptor complex mem      | 0.111  | 1.080 | 2.98E-01 | 2.98E+01 |  |
| 8006161 | NM_015594    | TBC1D29   | TBC1 domain family, member 29        | -0.019 | 0.987 | 8.86E-01 | 8.86E+01 |  |
| 8006170 | NR_015341    | LRRC37B2  | leucine rich repeat containing 37,   | 0.036  | 1.025 | 8.27E-01 | 8.27E+01 |  |
| 8006181 | ---          | ---       | ---                                  | -0.051 | 0.965 | 7.98E-01 | 7.98E+01 |  |
| 8006183 | NR_024187    | SUZ12P    | suppressor of zeste 12 homolog ps    | -0.009 | 0.994 | 9.77E-01 | 9.77E+01 |  |
| 8006229 | NM_032322    | RNF135    | ring finger protein 135              | 0.256  | 1.194 | 1.06E-03 | 1.06E-01 |  |
| 8006237 | ENST00000433 | LOC400590 | hypothetical LOC400590               | 0.161  | 1.118 | 3.80E-01 | 3.80E+01 |  |
| 8006239 | NM_00104249  | NF1       | neurofibromin 1                      | -0.068 | 0.954 | 6.96E-01 | 6.96E+01 |  |
| 8006298 | NM_032932    | RAB11FIP4 | RAB11 family interacting protein 4   | 0.042  | 1.030 | 6.68E-01 | 6.68E+01 |  |
| 8006319 | ---          | ---       | ---                                  | -0.020 | 0.986 | 9.16E-01 | 9.16E+01 |  |
| 8006321 | ---          | ---       | ---                                  | -0.121 | 0.920 | 2.99E-01 | 2.99E+01 |  |
| 8006325 | NM_015355    | SUZ12     | suppressor of zeste 12 homolog (D    | -0.015 | 0.990 | 9.37E-01 | 9.37E+01 |  |
| 8006336 | NM_052888    | LRRC37B   | leucine rich repeat containing 37B   | 0.110  | 1.079 | 4.32E-01 | 4.32E+01 |  |
| 8006345 | NM_00103356  | RHOT1     | ras homolog gene family, member      | 0.230  | 1.173 | 6.92E-02 | 6.92E+00 |  |
| 8006367 | NM_138328    | RHBDL3    | rhomboid, veinlet-like 3 (Drosophi   | 0.039  | 1.027 | 7.50E-01 | 7.50E+01 |  |
| 8006377 | NM_00109850  | ZNF207    | zinc finger protein 207              | 0.030  | 1.021 | 8.04E-01 | 8.04E+01 |  |
| 8006392 | NM_002815    | PSMD11    | proteasome (prosome, macropain       | -0.103 | 0.931 | 4.04E-01 | 4.04E+01 |  |
| 8006409 | NM_003885    | CDK5R1    | cyclin-dependent kinase 5, regulat   | -0.037 | 0.974 | 7.94E-01 | 7.94E+01 |  |
| 8006415 | NM_015544    | TMEM98    | transmembrane protein 98             | 0.091  | 1.065 | 2.84E-01 | 2.84E+01 |  |
| 8006423 | NM_173847    | SPACA3    | sperm acrosome associated 3          | -0.003 | 0.998 | 9.86E-01 | 9.86E+01 |  |
| 8006433 | NM_002982    | CCL2      | chemokine (C-C motif) ligand 2       | 0.229  | 1.172 | 7.05E-01 | 7.05E+01 |  |
| 8006445 | NM_002986    | CCL11     | chemokine (C-C motif) ligand 11      | -0.039 | 0.974 | 7.91E-01 | 7.91E+01 |  |
| 8006453 | NM_005623    | CCL8      | chemokine (C-C motif) ligand 8       | 1.461  | 2.753 | 5.07E-02 | 5.07E+00 |  |
| 8006466 | NM_207313    | TMEM132E  | transmembrane protein 132E           | -0.049 | 0.967 | 6.68E-01 | 6.68E+01 |  |
| 8006477 | NM_052857    | ZNF830    | zinc finger protein 830              | -0.083 | 0.944 | 4.81E-01 | 4.81E+01 |  |
| 8006479 | NM_013975    | LIG3      | ligase III, DNA, ATP-dependent       | -0.019 | 0.987 | 9.17E-01 | 9.17E+01 |  |
| 8006531 | NM_144975    | SLFN5     | schlafen family member 5             | 0.014  | 1.010 | 9.67E-01 | 9.67E+01 |  |
| 8006540 | NR_003037    | SNORD7    | small nucleolar RNA, C/D box 7       | -0.232 | 0.851 | 5.00E-01 | 5.00E+01 |  |
| 8006542 | NM_00103000  | AP2B1     | adaptor-related protein complex 2    | -0.036 | 0.975 | 7.92E-01 | 7.92E+01 |  |
| 8006562 | NM_033315    | RASL10B   | RAS-like, family 10, member B        | 0.014  | 1.010 | 9.10E-01 | 9.10E+01 |  |
| 8006569 | NM_145272    | C17orf50  | chromosome 17 open reading fram      | -0.063 | 0.957 | 4.12E-01 | 4.12E+01 |  |
| 8006573 | NM_139215    | TAF15     | TAF15 RNA polymerase II, TATA bo     | 0.002  | 1.002 | 9.86E-01 | 9.86E+01 |  |
| 8006590 | ---          | ---       | ---                                  | -0.039 | 0.973 | 9.37E-01 | 9.37E+01 |  |
| 8006592 | ---          | ---       | ---                                  | -0.050 | 0.966 | 8.46E-01 | 8.46E+01 |  |
| 8006594 | NM_002988    | CCL18     | chemokine (C-C motif) ligand 18 (p   | 0.156  | 1.115 | 6.48E-01 | 6.48E+01 |  |
| 8006602 | NM_002984    | CCL4      | chemokine (C-C motif) ligand 4       | -0.425 | 0.745 | 1.76E-01 | 1.76E+01 |  |
| 8006608 | NM_00100143  | CCL4L1    | chemokine (C-C motif) ligand 4-lik   | -0.433 | 0.740 | 1.56E-01 | 1.56E+01 |  |
| 8006621 | NM_00100143  | CCL4L1    | chemokine (C-C motif) ligand 4-lik   | -0.464 | 0.725 | 1.49E-01 | 1.49E+01 |  |

|         |              |          |                                      |        |       |          |          |
|---------|--------------|----------|--------------------------------------|--------|-------|----------|----------|
| 8006627 | NM_004773    | ZNHIT3   | zinc finger, HIT type 3              | -0.055 | 0.963 | 8.50E-01 | 8.50E+01 |
| 8006638 | NM_024835    | GGNBP2   | gametogenetin binding protein 2      | -0.084 | 0.944 | 4.93E-01 | 4.93E+01 |
| 8006655 | NM_024308    | DHRS11   | dehydrogenase/reductase (SDR fa      | -0.081 | 0.945 | 5.72E-01 | 5.72E+01 |
| 8006668 | NM_024864    | MRM1     | mitochondrial rRNA methyltransfe     | -0.064 | 0.957 | 5.76E-01 | 5.76E+01 |
| 8006679 | ---          | ---      | ---                                  | -0.006 | 0.996 | 9.68E-01 | 9.68E+01 |
| 8006681 | NM_005568    | LHX1     | LIM homeobox 1                       | -0.005 | 0.997 | 9.77E-01 | 9.77E+01 |
| 8006690 | NM_012138    | AATF     | apoptosis antagonizing transcripti   | 0.003  | 1.002 | 9.85E-01 | 9.85E+01 |
| 8006715 | NM_001488    | TADA2L   | transcriptional adaptor 2 (ADA2 h    | 0.041  | 1.029 | 8.74E-01 | 8.74E+01 |
| 8006736 | NM_007026    | DUSP14   | dual specificity phosphatase 14      | -0.021 | 0.985 | 9.19E-01 | 9.19E+01 |
| 8006746 | NM_00112339  | TBC1D3   | TBC1 domain family, member 3         | 0.009  | 1.006 | 9.77E-01 | 9.77E+01 |
| 8006762 | NM_032351    | MRPL45   | mitochondrial ribosomal protein L    | -0.326 | 0.798 | 6.29E-02 | 6.29E+00 |
| 8006768 | NM_014598    | SOC57    | suppressor of cytokine signaling 7   | -0.052 | 0.965 | 5.44E-01 | 5.44E+01 |
| 8006779 | NM_020876    | ARHGAP23 | Rho GTPase activating protein 23     | -0.041 | 0.972 | 8.40E-01 | 8.40E+01 |
| 8006786 | NM_020876    | ARHGAP23 | Rho GTPase activating protein 23     | 0.000  | 1.000 | 1.00E+00 | 1.00E+02 |
| 8006788 | NM_005937    | MLLT6    | myeloid/lymphoid or mixed-lineag     | -0.088 | 0.941 | 1.44E-01 | 1.44E+01 |
| 8006812 | NM_002795    | PSMB3    | proteasome (prosome, macropain       | 0.092  | 1.066 | 6.44E-01 | 6.44E+01 |
| 8006820 | NM_006148    | LASP1    | LIM and SH3 protein 1                | 0.029  | 1.020 | 8.88E-01 | 8.88E+01 |
| 8006834 | ---          | ---      | ---                                  | -0.105 | 0.930 | 4.33E-01 | 4.33E+01 |
| 8006845 | NM_000981    | RPL19    | ribosomal protein L19                | 0.030  | 1.021 | 8.22E-01 | 8.22E+01 |
| 8006850 | NM_016507    | CRKRS    | Cdc2-related kinase, arginine/seri   | -0.051 | 0.965 | 5.90E-01 | 5.90E+01 |
| 8006865 | NM_032192    | PPP1R1B  | protein phosphatase 1, regulatory    | 0.019  | 1.013 | 8.85E-01 | 8.85E+01 |
| 8006877 | NM_006804    | STARD3   | StAR-related lipid transfer (START   | 0.035  | 1.024 | 8.30E-01 | 8.30E+01 |
| 8006896 | NM_003673    | TCAP     | titin-cap (telethonin)               | -0.029 | 0.980 | 8.73E-01 | 8.73E+01 |
| 8006900 | NM_002686    | PNMT     | phenylethanolamine N-methyltra       | 0.039  | 1.027 | 7.98E-01 | 7.98E+01 |
| 8006906 | NM_00100586  | ERBB2    | v-erb-b2 erythroblastic leukemia v   | -0.020 | 0.986 | 8.88E-01 | 8.88E+01 |
| 8006968 | NM_178171    | GSDMA    | gasdermin A                          | 0.040  | 1.028 | 7.95E-01 | 7.95E+01 |
| 8006984 | NM_002809    | PSMD3    | proteasome (prosome, macropain       | -0.005 | 0.996 | 9.85E-01 | 9.85E+01 |
| 8006999 | NM_172220    | CSF3     | colony stimulating factor 3 (granu   | -0.114 | 0.924 | 1.11E-01 | 1.11E+01 |
| 8007008 | NM_003250    | THRA     | thyroid hormone receptor, alpha (    | 0.029  | 1.021 | 8.99E-01 | 8.99E+01 |
| 8007023 | NM_00101224  | MSL1     | male-specific lethal 1 homolog (Dr   | -0.034 | 0.977 | 8.92E-01 | 8.92E+01 |
| 8007028 | NM_007359    | CASC3    | cancer susceptibility candidate 3    | -0.066 | 0.956 | 4.62E-01 | 4.62E+01 |
| 8007058 | NM_133264    | WIPF2    | WAS/WASL interacting protein far     | -0.012 | 0.992 | 9.53E-01 | 9.53E+01 |
| 8007069 | ---          | ---      | ---                                  | 0.005  | 1.003 | 9.85E-01 | 9.85E+01 |
| 8007084 | NM_000964    | RARA     | retinoic acid receptor, alpha        | -0.061 | 0.959 | 6.59E-01 | 6.59E+01 |
| 8007100 | NM_001552    | IGFBP4   | insulin-like growth factor binding   | 0.023  | 1.016 | 8.63E-01 | 8.63E+01 |
| 8007112 | NM_00114604  | KRTAP4-9 | keratin associated protein 4-9       | -0.008 | 0.994 | 9.53E-01 | 9.53E+01 |
| 8007115 | NM_00114604  | KRTAP4-9 | keratin associated protein 4-9       | -0.035 | 0.976 | 6.92E-01 | 6.92E+01 |
| 8007118 | ENST00000318 | KRTAP9-2 | keratin associated protein 9-2       | -0.154 | 0.899 | 1.95E-01 | 1.95E+01 |
| 8007123 | NM_031961    | KRTAP9-2 | keratin associated protein 9-2       | -0.044 | 0.970 | 5.04E-01 | 5.04E+01 |
| 8007127 | NM_031962    | KRTAP9-3 | keratin associated protein 9-3       | 0.038  | 1.027 | 8.05E-01 | 8.05E+01 |
| 8007130 | NM_031963    | KRTAP9-8 | keratin associated protein 9-8       | -0.044 | 0.970 | 6.11E-01 | 6.11E+01 |
| 8007134 | NM_033191    | KRTAP9-4 | keratin associated protein 9-4       | -0.024 | 0.983 | 7.92E-01 | 7.92E+01 |
| 8007141 | NM_005801    | EIF1     | eukaryotic translation initiation fa | -0.058 | 0.961 | 3.81E-01 | 3.81E+01 |
| 8007148 | NM_000805    | GAST     | gastrin                              | -0.030 | 0.980 | 9.13E-01 | 9.13E+01 |
| 8007152 | ---          | ---      | ---                                  | -0.007 | 0.995 | 9.78E-01 | 9.78E+01 |
| 8007154 | NM_021939    | FKBP10   | FK506 binding protein 10, 65 kDa     | -0.047 | 0.968 | 6.62E-01 | 6.62E+01 |
| 8007188 | NM_033133    | CNP      | 2',3'-cyclic nucleotide 3' phosphod  | -0.037 | 0.974 | 8.21E-01 | 8.21E+01 |
| 8007197 | NM_017595    | NKIRAS2  | NFKB inhibitor interacting Ras-like  | -0.052 | 0.965 | 7.27E-01 | 7.27E+01 |
| 8007212 | NM_003152    | STAT5A   | signal transducer and activator of   | -0.018 | 0.987 | 9.27E-01 | 9.27E+01 |
| 8007250 | NM_000263    | NAGLU    | N-acetylglucosaminidase, alpha-      | -0.019 | 0.987 | 9.04E-01 | 9.04E+01 |
| 8007259 | ---          | ---      | ---                                  | -0.029 | 0.980 | 7.97E-01 | 7.97E+01 |
| 8007263 | NM_000413    | HSD17B1  | hydroxysteroid (17-beta) dehydro     | -0.019 | 0.987 | 8.98E-01 | 8.98E+01 |
| 8007272 | NM_025233    | COASY    | Coenzyme A synthase                  | 0.015  | 1.011 | 9.27E-01 | 9.27E+01 |
| 8007290 | NM_170607    | MLX      | MAX-like protein X                   | -0.139 | 0.908 | 1.11E-01 | 1.11E+01 |
| 8007302 | NM_001070    | TUBG1    | tubulin, gamma 1                     | -0.133 | 0.912 | 2.83E-01 | 2.83E+01 |
| 8007312 | NM_016437    | TUBG2    | tubulin, gamma 2                     | -0.197 | 0.872 | 1.29E-01 | 1.29E+01 |
| 8007323 | NM_003632    | CNTNAP1  | contactin associated protein 1       | -0.027 | 0.982 | 8.74E-01 | 8.74E+01 |
| 8007348 | NM_005854    | RAMP2    | receptor (G protein-coupled) activ   | -0.081 | 0.945 | 4.29E-01 | 4.29E+01 |
| 8007355 | NM_032353    | VPS25    | vacuolar protein sorting 25 homol    | 0.085  | 1.060 | 5.70E-01 | 5.70E+01 |
| 8007363 | NM_032387    | WNK4     | WNK lysine deficient protein kinas   | 0.006  | 1.004 | 9.75E-01 | 9.75E+01 |
| 8007397 | NM_176863    | PSME3    | proteasome (prosome, macropain       | -0.022 | 0.985 | 9.16E-01 | 9.16E+01 |
| 8007414 | NM_009590    | AOC2     | amine oxidase, copper containing     | 0.017  | 1.012 | 9.33E-01 | 9.33E+01 |
| 8007420 | NM_003734    | AOC3     | amine oxidase, copper containing     | 0.039  | 1.028 | 8.52E-01 | 8.52E+01 |
| 8007427 | NM_003734    | AOC3     | amine oxidase, copper containing     | -0.068 | 0.954 | 6.50E-01 | 6.50E+01 |
| 8007435 | NM_173079    | RUNDC1   | RUN domain containing 1              | -0.052 | 0.965 | 7.77E-01 | 7.77E+01 |
| 8007441 | NM_000988    | RPL27    | ribosomal protein L27                | 0.045  | 1.031 | 7.79E-01 | 7.79E+01 |
| 8007446 | NM_005533    | IFI35    | interferon-induced protein 35        | 0.247  | 1.187 | 2.12E-01 | 2.12E+01 |
| 8007462 | NR_003108    | NBR2     | neighbor of BRCA1 gene 2 (non-pr     | 0.111  | 1.080 | 3.75E-01 | 3.75E+01 |
| 8007493 | NM_001661    | ARL4D    | ADP-ribosylation factor-like 4D      | -0.110 | 0.926 | 4.06E-01 | 4.06E+01 |
| 8007505 | NM_004941    | DHX8     | DEAH (Asp-Glu-Ala-His) box polyp     | -0.018 | 0.987 | 9.24E-01 | 9.24E+01 |
| 8007537 | NM_145273    | CD300LG  | CD300 molecule-like family memb      | 0.016  | 1.011 | 9.22E-01 | 9.22E+01 |
| 8007548 | NR_026770    | C17orf88 | chromosome 17 open reading fram      | -0.072 | 0.951 | 6.17E-01 | 6.17E+01 |
| 8007550 | NM_153006    | NAGS     | N-acetylglutamate synthase           | -0.081 | 0.945 | 1.59E-01 | 1.59E+01 |
| 8007561 | NM_138387    | G6PC3    | glucose 6 phosphatase, catalytic, 3  | 0.027  | 1.019 | 8.78E-01 | 8.78E+01 |
| 8007569 | AK291924     | C17orf53 | chromosome 17 open reading fram      | -0.025 | 0.983 | 8.81E-01 | 8.81E+01 |
| 8007584 | NM_080863    | ASB16    | ankyrin repeat and SOCS box-cont     | 0.005  | 1.003 | 9.82E-01 | 9.82E+01 |
| 8007594 | NM_177441    | TMUB2    | transmembrane and ubiquitin-like     | -0.021 | 0.986 | 9.13E-01 | 9.13E+01 |



|         |                   |           |                                        |        |       |          |          |  |  |
|---------|-------------------|-----------|----------------------------------------|--------|-------|----------|----------|--|--|
| 8007607 | NM_006695         | RUNDC3A   | RUN domain containing 3A               | -0.098 | 0.934 | 3.04E-01 | 3.04E+01 |  |  |
| 8007620 | NM_002087         | GRN       | granulin                               | 0.295  | 1.227 | 6.73E-02 | 6.73E+00 |  |  |
| 8007637 | NM_001466         | FZD2      | frizzled homolog 2 (Drosophila)        | -0.030 | 0.980 | 8.57E-01 | 8.57E+01 |  |  |
| 8007641 | ENST00000434      | LOC728675 | hypothetical LOC728675                 | -0.043 | 0.971 | 7.45E-01 | 7.45E+01 |  |  |
| 8007651 | NM_145663         | DBF4B     | DBF4 homolog B (S. cerevisiae)         | 0.089  | 1.063 | 4.22E-01 | 4.22E+01 |  |  |
| 8007673 | ---               | ---       | ---                                    | 0.045  | 1.031 | 7.77E-01 | 7.77E+01 |  |  |
| 8007675 | NM_002390         | ADAM11    | ADAM metalloproteinase domain 1        | 0.021  | 1.015 | 8.78E-01 | 8.78E+01 |  |  |
| 8007701 | NM_016438         | HIGD1B    | HIG1 hypoxia inducible domain fa       | -0.063 | 0.957 | 8.05E-01 | 8.05E+01 |  |  |
| 8007715 | NM_021079         | NMT1      | N-myristoyltransferase 1               | -0.022 | 0.985 | 8.96E-01 | 8.96E+01 |  |  |
| 8007730 | NM_00113570       | ACBD4     | acyl-Coenzyme A binding domain         | -0.025 | 0.983 | 8.61E-01 | 8.61E+01 |  |  |
| 8007745 | NM_006460         | HEXIM1    | hexamethylene bis-acetamide ind        | -0.127 | 0.916 | 1.92E-01 | 1.92E+01 |  |  |
| 8007750 | NM_144608         | HEXIM2    | hexamethylene bis-acetamide indu       | 0.009  | 1.006 | 9.50E-01 | 9.50E+01 |  |  |
| 8007757 | NM_005892         | FMNL1     | formin-like 1                          | -0.106 | 0.929 | 2.90E-01 | 2.90E+01 |  |  |
| 8007790 | NM_003954         | MAP3K14   | mitogen-activated protein kinase       | -0.022 | 0.985 | 8.87E-01 | 8.87E+01 |  |  |
| 8007794 | NM_00103908       | ARL17     | ADP-ribosylation factor-like 17        | -0.006 | 0.996 | 9.89E-01 | 9.89E+01 |  |  |
| 8007797 | NM_001029 //RPS26 | RPS26     | ribosomal protein S26 // ribosom       | 0.011  | 1.008 | 9.81E-01 | 9.81E+01 |  |  |
| 8007799 | NR_026680         | MGC57346  | hypothetical LOC401884                 | -0.126 | 0.916 | 5.76E-01 | 5.76E+01 |  |  |
| 8007803 | NR_026905         | C17orf69  | chromosome 17 open reading fram        | -0.001 | 0.999 | 9.98E-01 | 9.98E+01 |  |  |
| 8007808 | NM_00114514       | CRHR1     | corticotropin releasing hormone r      | -0.091 | 0.939 | 1.78E-01 | 1.78E+01 |  |  |
| 8007826 | NM_175882         | IMP5      | intramembrane protease 5               | 0.019  | 1.013 | 8.86E-01 | 8.86E+01 |  |  |
| 8007848 | NM_005456         | MAPK8IP1  | mitogen-activated protein kinase       | -0.091 | 0.939 | 2.43E-01 | 2.43E+01 |  |  |
| 8007850 | NM_014834         | LRRC37A   | leucine rich repeat containing 37A     | 0.016  | 1.011 | 9.54E-01 | 9.54E+01 |  |  |
| 8007865 | ---               | ---       | ---                                    | 0.044  | 1.031 | 8.64E-01 | 8.64E+01 |  |  |
| 8007867 | NM_00100660       | LRRC37A2  | leucine rich repeat containing 37,     | 0.014  | 1.010 | 9.58E-01 | 9.58E+01 |  |  |
| 8007883 | ---               | ---       | ---                                    | 0.044  | 1.031 | 8.64E-01 | 8.64E+01 |  |  |
| 8007885 | NM_006178         | NSF       | N-ethylmaleimide-sensitive factor      | 0.153  | 1.112 | 2.84E-01 | 2.84E+01 |  |  |
| 8007895 | NM_003396         | WNT9B     | wingless-type MMTV integration s       | -0.092 | 0.938 | 2.99E-01 | 2.99E+01 |  |  |
| 8007904 | NM_004287         | GOSR2     | golgi SNAP receptor complex mem        | 0.047  | 1.033 | 7.77E-01 | 7.77E+01 |  |  |
| 8007917 | ---               | ---       | ---                                    | -0.040 | 0.973 | 8.88E-01 | 8.88E+01 |  |  |
| 8007919 | NR_002940         | LRRC37A4  | leucine rich repeat containing 37,     | -0.002 | 0.999 | 9.97E-01 | 9.97E+01 |  |  |
| 8007921 | NM_00100284       | MYL4      | myosin, light chain 4, alkali; atrial, | -0.067 | 0.955 | 5.17E-01 | 5.17E+01 |  |  |
| 8007976 | NM_006310         | NPEPPS    | aminopeptidase puromycin sensit        | 0.017  | 1.012 | 9.40E-01 | 9.40E+01 |  |  |
| 8007990 | ---               | ---       | ---                                    | 0.046  | 1.032 | 9.50E-01 | 9.50E+01 |  |  |
| 8007992 | NM_002265         | KPNB1     | karyopherin (importin) beta 1          | 0.129  | 1.093 | 1.25E-01 | 1.25E+01 |  |  |
| 8008016 | NM_014726         | TBKBP1    | TBK1 binding protein 1                 | 0.009  | 1.006 | 9.60E-01 | 9.60E+01 |  |  |
| 8008029 | NM_013351         | TBX21     | T-box 21                               | -0.014 | 0.991 | 9.53E-01 | 9.53E+01 |  |  |
| 8008038 | ---               | ---       | ---                                    | -0.009 | 0.994 | 9.90E-01 | 9.90E+01 |  |  |
| 8008052 | NM_003110         | SP2       | Sp2 transcription factor               | 0.007  | 1.005 | 9.73E-01 | 9.73E+01 |  |  |
| 8008064 | NM_018129         | PNPO      | pyridoxamine 5'-phosphate oxidas       | 0.025  | 1.017 | 8.50E-01 | 8.50E+01 |  |  |
| 8008074 | NM_176096         | CDK5RAP3  | CDK5 regulatory subunit associate      | 0.085  | 1.061 | 4.31E-01 | 4.31E+01 |  |  |
| 8008087 | NM_003204         | NFE2L1    | nuclear factor (erythroid-derived 2    | 0.023  | 1.016 | 9.44E-01 | 9.44E+01 |  |  |
| 8008096 | NM_152244         | SNX11     | sorting nexin 11                       | 0.007  | 1.005 | 9.81E-01 | 9.81E+01 |  |  |
| 8008110 | ENST00000376      | LOC404266 | hypothetical LOC404266                 | -0.090 | 0.939 | 2.12E-01 | 2.12E+01 |  |  |
| 8008113 | NM_005831         | CALCOCO2  | calcium binding and coiled-coil do     | 0.212  | 1.158 | 2.84E-02 | 2.84E+00 |  |  |
| 8008132 | NM_005175         | ATP5G1    | ATP synthase, H+ transporting, mi      | 0.092  | 1.066 | 3.67E-01 | 3.67E+01 |  |  |
| 8008139 | NM_023079         | UBE2Z     | ubiquitin-conjugating enzyme E2Z       | 0.127  | 1.092 | 3.91E-01 | 3.91E+01 |  |  |
| 8008185 | NM_016428         | ABI3      | ABI family, member 3                   | 0.084  | 1.060 | 5.06E-01 | 5.06E+01 |  |  |
| 8008201 | NM_002507         | NGFR      | nerve growth factor receptor (TNF      | 0.028  | 1.020 | 7.98E-01 | 7.98E+01 |  |  |
| 8008208 | NM_007225         | NXP3      | neurexophilin 3                        | 0.031  | 1.022 | 8.25E-01 | 8.25E+01 |  |  |
| 8008213 | NM_007067         | MYST2     | MYST histone acetyltransferase 2       | -0.051 | 0.965 | 7.51E-01 | 7.51E+01 |  |  |
| 8008228 | NM_138281         | DLX4      | distal-less homeobox 4                 | -0.100 | 0.933 | 1.53E-01 | 1.53E+01 |  |  |
| 8008237 | NM_002204         | ITGA3     | integrin, alpha 3 (antigen CD49C, i    | -0.078 | 0.947 | 4.89E-01 | 4.89E+01 |  |  |
| 8008263 | NM_002611         | PK2       | pyruvate dehydrogenase kinase, is      | -0.035 | 0.976 | 8.78E-01 | 8.78E+01 |  |  |
| 8008277 | NM_000023         | SGCA      | sarcoglycan, alpha (50kDa dystrop      | -0.043 | 0.971 | 7.27E-01 | 7.27E+01 |  |  |
| 8008289 | NM_153229         | TMEM92    | transmembrane protein 92               | -0.046 | 0.968 | 6.65E-01 | 6.65E+01 |  |  |
| 8008297 | NM_022167         | XYLT2     | xylosyltransferase II                  | -0.074 | 0.950 | 4.47E-01 | 4.47E+01 |  |  |
| 8008310 | NM_152463         | EME1      | essential meiotic endonuclease 1       | -0.025 | 0.983 | 8.91E-01 | 8.91E+01 |  |  |
| 8008339 | NM_018346         | RSAD1     | radical S-adenosyl methionine dor      | -0.142 | 0.906 | 8.62E-02 | 8.62E+00 |  |  |
| 8008372 | NM_017957         | EPN3      | epsin 3                                | -0.071 | 0.952 | 3.31E-01 | 3.31E+01 |  |  |
| 8008409 | NM_018896         | CACNA1G   | calcium channel, voltage-depende       | -0.016 | 0.989 | 8.41E-01 | 8.41E+01 |  |  |
| 8008454 | NM_003786         | ABCC3     | ATP-binding cassette, sub-family C     | 0.089  | 1.063 | 5.21E-01 | 5.21E+01 |  |  |
| 8008493 | NM_016424         | LUC7L3    | LUC7-like 3 (S. cerevisiae)            | -0.033 | 0.977 | 7.68E-01 | 7.68E+01 |  |  |
| 8008511 | NM_175575         | WFIKK2    | WAP, follistatin/kazal, immunoglo      | 0.010  | 1.007 | 9.56E-01 | 9.56E+01 |  |  |
| 8008517 | NM_198175         | NME1      | non-metastatic cells 1, protein (NM    | 0.049  | 1.034 | 8.81E-01 | 8.81E+01 |  |  |
| 8008530 | NM_016001         | UTP18     | UTP18, small subunit (SSU) proces      | 0.184  | 1.136 | 3.33E-02 | 3.33E+00 |  |  |
| 8008544 | NM_032559         | KIF2B     | kinesin family member 2B               | -0.016 | 0.989 | 9.09E-01 | 9.09E+01 |  |  |
| 8008588 | NM_002126         | HLF       | hepatic leukemia factor                | -0.053 | 0.964 | 7.73E-01 | 7.73E+01 |  |  |
| 8008598 | NM_00110240       | PCTP      | phosphatidylcholine transfer prote     | -0.007 | 0.996 | 9.88E-01 | 9.88E+01 |  |  |
| 8008627 | NM_005450         | NOG       | noggin                                 | -0.111 | 0.926 | 5.30E-01 | 5.30E+01 |  |  |
| 8008629 | NM_003647         | DGKE      | diacylglycerol kinase, epsilon 64kD    | -0.039 | 0.973 | 8.63E-01 | 8.63E+01 |  |  |
| 8008644 | ---               | ---       | ---                                    | -0.013 | 0.991 | 9.61E-01 | 9.61E+01 |  |  |
| 8008662 | NR_002818         | RNF126P1  | ring finger protein 126 pseudogen      | 0.010  | 1.007 | 9.55E-01 | 9.55E+01 |  |  |
| 8008664 | NM_003488         | AKAP1     | A kinase (PKA) anchor protein 1        | 0.011  | 1.008 | 9.60E-01 | 9.60E+01 |  |  |
| 8008682 | NM_138962         | MSI2      | musashi homolog 2 (Drosophila)         | 0.028  | 1.020 | 9.07E-01 | 9.07E+01 |  |  |
| 8008700 | AK021772          | FLJ11710  | hypothetical protein FLJ11710          | -0.010 | 0.993 | 9.67E-01 | 9.67E+01 |  |  |
| 8008702 | ---               | ---       | ---                                    | -0.005 | 0.997 | 9.78E-01 | 9.78E+01 |  |  |
| 8008704 | ---               | ---       | ---                                    | -0.014 | 0.990 | 9.49E-01 | 9.49E+01 |  |  |

|         |              |           |                                                                      |        |       |          |          |  |
|---------|--------------|-----------|----------------------------------------------------------------------|--------|-------|----------|----------|--|
| 8008706 | NM_080677    | DYNLL2    | dynein, light chain, LC8-type 2                                      | -0.124 | 0.918 | 4.25E-01 | 4.25E+01 |  |
| 8008716 | NR_002307    | MSX2P1    | msh homeobox 2 pseudogene 1                                          | -0.057 | 0.961 | 5.98E-01 | 5.98E+01 |  |
| 8008736 | NM_006151    | LPO       | lactoperoxidase                                                      | -0.013 | 0.991 | 9.29E-01 | 9.29E+01 |  |
| 8008819 | NM_00100540  | YPEL2     | yippee-like 2 (Drosophila)                                           | -0.048 | 0.967 | 8.43E-01 | 8.43E+01 |  |
| 8008825 | NM_024612    | DHX40     | DEAH (Asp-Glu-Ala-His) box polypeptide 40                            | -0.089 | 0.940 | 6.34E-01 | 6.34E+01 |  |
| 8008834 | NM_004859    | CLTC      | clathrin, heavy chain (Hc)                                           | 0.133  | 1.097 | 3.31E-01 | 3.31E+01 |  |
| 8008870 | NM_030938    | TMEM49    | transmembrane protein 49                                             | 0.062  | 1.044 | 7.56E-01 | 7.56E+01 |  |
| 8008885 | ---          | ---       | ---                                                                  | 0.047  | 1.033 | 8.58E-01 | 8.58E+01 |  |
| 8008887 | NM_003161    | RPS6KB1   | ribosomal protein S6 kinase, 70kDa                                   | -0.001 | 0.999 | 9.93E-01 | 9.93E+01 |  |
| 8008900 | NM_000717    | CA4       | carbonic anhydrase IV                                                | -0.009 | 0.993 | 9.50E-01 | 9.50E+01 |  |
| 8008914 | NM_181707    | C17orf64  | chromosome 17 open reading frame 64                                  | -0.004 | 0.997 | 9.85E-01 | 9.85E+01 |  |
| 8008922 | NM_003620    | PPM1D     | protein phosphatase 1D magnesium dependent                           | -0.017 | 0.988 | 9.49E-01 | 9.49E+01 |  |
| 8008933 | NM_00109943  | BCAS3     | breast carcinoma amplified sequence 3                                | -0.038 | 0.974 | 8.05E-01 | 8.05E+01 |  |
| 8008965 | ---          | ---       | ---                                                                  | 0.126  | 1.091 | 7.81E-01 | 7.81E+01 |  |
| 8008969 | NM_005994    | TBX2      | T-box 2                                                              | -0.062 | 0.958 | 3.35E-01 | 3.35E+01 |  |
| 8008980 | BC046200     | C17orf82  | chromosome 17 open reading frame 82                                  | -0.049 | 0.966 | 7.22E-01 | 7.22E+01 |  |
| 8008982 | NM_018488    | TBX4      | T-box 4                                                              | -0.028 | 0.981 | 8.32E-01 | 8.32E+01 |  |
| 8008991 | ---          | ---       | ---                                                                  | 0.111  | 1.080 | 7.89E-01 | 7.89E+01 |  |
| 8009008 | NM_181725    | METTL2A   | methyltransferase like 2A                                            | -0.047 | 0.968 | 7.97E-01 | 7.97E+01 |  |
| 8009014 | NM_006852    | TLK2      | tousled-like kinase 2                                                | -0.086 | 0.942 | 2.13E-01 | 2.13E+01 |  |
| 8009040 | NM_006039    | MRC2      | mannose receptor, C type 2                                           | -0.041 | 0.972 | 6.44E-01 | 6.44E+01 |  |
| 8009075 | NM_025185    | TANC2     | tetratricopeptide repeat, ankyrin repeat domain 2                    | -0.050 | 0.966 | 7.78E-01 | 7.78E+01 |  |
| 8009094 | ENST00000416 | LOC342541 | similar to TRIMCyp                                                   | 0.026  | 1.018 | 8.87E-01 | 8.87E+01 |  |
| 8009096 | NM_000789    | ACE       | angiotensin I converting enzyme (angiotensinase)                     | 0.070  | 1.050 | 3.85E-01 | 3.85E+01 |  |
| 8009145 | NM_030779    | KCNH6     | potassium voltage-gated channel, subfamily H member 6                | -0.019 | 0.987 | 8.27E-01 | 8.27E+01 |  |
| 8009164 | NM_005828    | DCAF7     | DOB1 and CUL4 associated factor 7                                    | 0.058  | 1.041 | 5.58E-01 | 5.58E+01 |  |
| 8009176 | NM_016360    | TACO1     | translational activator of mitochondrial translation 1               | 0.069  | 1.049 | 6.56E-01 | 6.56E+01 |  |
| 8009183 | NM_203351    | MAP3K3    | mitogen-activated protein kinase 3                                   | 0.051  | 1.036 | 6.98E-01 | 6.98E+01 |  |
| 8009205 | NM_007372    | DDX42     | DEAD (Asp-Glu-Ala-Asp) box polypeptide 42                            | 0.037  | 1.026 | 7.56E-01 | 7.56E+01 |  |
| 8009227 | NM_002805    | PSMC5     | proteasome (prosome, macropain, multicatalytic proteinase) subunit 5 | -0.036 | 0.975 | 7.68E-01 | 7.68E+01 |  |
| 8009241 | NR_004380    | SNORD104  | small nucleolar RNA, C/D box 104                                     | -0.186 | 0.879 | 5.02E-01 | 5.02E+01 |  |
| 8009253 | ---          | ---       | ---                                                                  | 0.236  | 1.178 | 3.62E-01 | 3.62E+01 |  |
| 8009255 | NM_138363    | CCDC45    | coiled-coil domain containing 45                                     | -0.023 | 0.984 | 9.00E-01 | 9.00E+01 |  |
| 8009277 | NM_003835    | RGS9      | regulator of G-protein signaling 9                                   | -0.064 | 0.957 | 7.86E-01 | 7.86E+01 |  |
| 8009301 | NM_002737    | PRKA      | protein kinase C, alpha                                              | 0.129  | 1.093 | 6.05E-01 | 6.05E+01 |  |
| 8009326 | NM_145811    | CACNG5    | calcium channel, voltage-dependent, gamma 5                          | -0.004 | 0.997 | 9.83E-01 | 9.83E+01 |  |
| 8009334 | NM_014405    | CACNG4    | calcium channel, voltage-dependent, gamma 4                          | -0.046 | 0.969 | 7.01E-01 | 7.01E+01 |  |
| 8009349 | ---          | ---       | ---                                                                  | 0.015  | 1.011 | 9.56E-01 | 9.56E+01 |  |
| 8009351 | ---          | ---       | ---                                                                  | 0.151  | 1.111 | 1.14E-01 | 1.14E+01 |  |
| 8009353 | NM_181671    | PITPNC1   | phosphatidylinositol transfer protein class C member 1               | -0.204 | 0.868 | 1.58E-01 | 1.58E+01 |  |
| 8009366 | NM_015462    | NOL11     | nucleolar protein 11                                                 | 0.040  | 1.028 | 8.47E-01 | 8.47E+01 |  |
| 8009380 | NR_003706    | SNORA38B  | small nucleolar RNA, H/ACA box 38                                    | -0.038 | 0.974 | 8.80E-01 | 8.80E+01 |  |
| 8009382 | NM_004459    | BPTF      | bromodomain PHD finger transcription factor 1                        | -0.059 | 0.960 | 5.45E-01 | 5.45E+01 |  |
| 8009417 | NM_002266    | KPNA2     | karyopherin alpha 2 (RAG cohort 1)                                   | 0.024  | 1.017 | 9.53E-01 | 9.53E+01 |  |
| 8009430 | NR_027283    | LOC440461 | SH3 domain containing 20 pseudogene                                  | -0.055 | 0.963 | 5.16E-01 | 5.16E+01 |  |
| 8009432 | NM_016627    | AMZ2      | archaealysin family metalloprotease 2                                | 0.028  | 1.019 | 8.71E-01 | 8.71E+01 |  |
| 8009443 | NM_014960    | ARSG      | arylsulfatase G                                                      | 0.060  | 1.043 | 3.85E-01 | 3.85E+01 |  |
| 8009457 | NM_212472    | PRKAR1A   | protein kinase, cAMP-dependent, regulatory subunit alpha 1           | 0.001  | 1.001 | 9.94E-01 | 9.94E+01 |  |
| 8009476 | NM_002758    | MAP2K6    | mitogen-activated protein kinase 6                                   | 0.169  | 1.125 | 3.40E-01 | 3.40E+01 |  |
| 8009502 | NM_000891    | KCNJ2     | potassium inwardly-rectifying channel subfamily J member 2           | 0.390  | 1.311 | 9.28E-02 | 9.28E+00 |  |
| 8009513 | ---          | ---       | ---                                                                  | 0.003  | 1.002 | 9.89E-01 | 9.89E+01 |  |
| 8009517 | NM_000346    | SOX9      | SRY (sex determining region Y)-box 9                                 | -0.041 | 0.972 | 6.20E-01 | 6.20E+01 |  |
| 8009526 | NM_001050    | SSTR2     | somatostatin receptor 2                                              | -0.131 | 0.913 | 1.80E-01 | 1.80E+01 |  |
| 8009533 | NM_018714    | COG1      | component of oligomeric golgi core                                   | -0.075 | 0.949 | 4.13E-01 | 4.13E+01 |  |
| 8009552 | NM_017941    | C17orf80  | chromosome 17 open reading frame 80                                  | 0.008  | 1.005 | 9.74E-01 | 9.74E+01 |  |
| 8009561 | NM_000999    | RPL38     | ribosomal protein L38                                                | 0.035  | 1.024 | 7.51E-01 | 7.51E+01 |  |
| 8009568 | NM_032646    | TTYH2     | twenty homolog 2 (Drosophila)                                        | -0.037 | 0.974 | 7.07E-01 | 7.07E+01 |  |
| 8009585 | NM_023036    | DNAI2     | dynein, axonemal, intermediate chain 2                               | -0.009 | 0.994 | 9.61E-01 | 9.61E+01 |  |
| 8009602 | NM_153209    | KIF19     | kinesin family member 19                                             | 0.020  | 1.014 | 8.77E-01 | 8.77E+01 |  |
| 8009631 | NM_181790    | GPR142    | G protein-coupled receptor 142                                       | -0.001 | 0.999 | 9.94E-01 | 9.94E+01 |  |
| 8009639 | NM_022036    | GPRC5C    | G protein-coupled receptor, family C member 5                        | -0.062 | 0.958 | 5.15E-01 | 5.15E+01 |  |
| 8009653 | NM_007261    | CD300A    | CD300a molecule                                                      | 0.041  | 1.029 | 8.90E-01 | 8.90E+01 |  |
| 8009666 | NM_175738    | RAB37     | RAB37, member RAS oncogene family                                    | 0.174  | 1.128 | 1.80E-02 | 1.80E+00 |  |
| 8009685 | NM_004252    | SLC9A3R1  | solute carrier family 9 (sodium/hydrogen antiporter) member 1        | 0.001  | 1.001 | 9.96E-01 | 9.96E+01 |  |
| 8009693 | NM_017728    | TMEM104   | transmembrane protein 104                                            | 0.030  | 1.021 | 8.94E-01 | 8.94E+01 |  |
| 8009705 | NM_178160    | OTOP2     | otopetrin 2                                                          | -0.014 | 0.991 | 9.33E-01 | 9.33E+01 |  |
| 8009713 | NM_178233    | OTOP3     | otopetrin 3                                                          | -0.051 | 0.965 | 6.24E-01 | 6.24E+01 |  |
| 8009727 | NM_001545    | ICT1      | immature colon carcinoma transmembrane protein 1                     | 0.024  | 1.017 | 9.04E-01 | 9.04E+01 |  |
| 8009737 | NM_015353    | KCTD2     | potassium channel tetramerisation domain containing 2                | 0.032  | 1.023 | 8.08E-01 | 8.08E+01 |  |
| 8009746 | NM_004695    | SLC16A5   | solute carrier family 16, member 5                                   | 0.056  | 1.039 | 6.08E-01 | 6.08E+01 |  |
| 8009755 | NM_024585    | ARMC7     | armadillo repeat containing 7                                        | 0.039  | 1.028 | 7.97E-01 | 7.97E+01 |  |
| 8009761 | NM_024844    | NUP85     | nucleoporin 85kDa                                                    | 0.060  | 1.043 | 6.05E-01 | 6.05E+01 |  |
| 8009784 | NM_015971    | MRPS7     | mitochondrial ribosomal protein S7                                   | 0.052  | 1.037 | 7.44E-01 | 7.44E+01 |  |
| 8009792 | ---          | ---       | ---                                                                  | 0.201  | 1.150 | 5.55E-01 | 5.55E+01 |  |
| 8009796 | NM_014738    | KIAA0195  | KIAA0195                                                             | -0.073 | 0.951 | 2.35E-01 | 2.35E+01 |  |
| 8009832 | NM_207346    | TSEN54    | tRNA splicing endonuclease 54 homolog                                | -0.070 | 0.953 | 3.51E-01 | 3.51E+01 |  |
| 8009844 | NM_00103180  | LLGL2     | lethal giant larvae homolog 2 (Drosophila)                           | -0.029 | 0.980 | 8.31E-01 | 8.31E+01 |  |

|         |              |              |                                                            |        |       |          |          |  |  |
|---------|--------------|--------------|------------------------------------------------------------|--------|-------|----------|----------|--|--|
| 8009873 | NR_003587    | MYO15B       | myosin XVB pseudogene                                      | -0.035 | 0.976 | 8.95E-01 | 8.95E+01 |  |  |
| 8009875 | NR_003587    | MYO15B       | myosin XVB pseudogene                                      | -0.020 | 0.986 | 8.29E-01 | 8.29E+01 |  |  |
| 8009913 | NR_003587    | MYO15B       | myosin XVB pseudogene                                      | -0.018 | 0.988 | 9.28E-01 | 9.28E+01 |  |  |
| 8009929 | NM_00116299  | LOC643008    | hypothetical protein LOC643008                             | -0.065 | 0.956 | 7.05E-01 | 7.05E+01 |  |  |
| 8009932 | NM_013260    | SAP30BP      | SAP30 binding protein                                      | -0.085 | 0.943 | 3.57E-01 | 3.57E+01 |  |  |
| 8009995 | NM_00108041  | UNK          | unkempt homolog (Drosophila)                               | 0.033  | 1.023 | 8.64E-01 | 8.64E+01 |  |  |
| 8010012 | NM_00111332  | LOC100134934 | hypothetical protein LOC100134934                          | -0.021 | 0.986 | 8.94E-01 | 8.94E+01 |  |  |
| 8010017 | NM_001258    | CDK3         | cyclin-dependent kinase 3                                  | -0.032 | 0.978 | 7.90E-01 | 7.90E+01 |  |  |
| 8010021 | NM_001258    | CDK3         | cyclin-dependent kinase 3                                  | 0.035  | 1.025 | 7.86E-01 | 7.86E+01 |  |  |
| 8010030 | NM_003857    | GALR2        | galanin receptor 2                                         | -0.057 | 0.961 | 6.54E-01 | 6.54E+01 |  |  |
| 8010036 | NM_180990    | ZACN         | zinc activated ligand-gated ion channel                    | -0.037 | 0.974 | 7.91E-01 | 7.91E+01 |  |  |
| 8010050 | NM_182565    | FAM100B      | family with sequence similarity 10                         | -0.009 | 0.994 | 9.70E-01 | 9.70E+01 |  |  |
| 8010061 | NM_182965    | SPHK1        | sphingosine kinase 1                                       | -0.022 | 0.985 | 9.44E-01 | 9.44E+01 |  |  |
| 8010071 | NM_001088    | AANAT        | arylalkylamine N-acetyltransferase                         | -0.014 | 0.990 | 9.37E-01 | 9.37E+01 |  |  |
| 8010078 | NR_004397    | SNORD1C      | small nucleolar RNA, C/D box 1C                            | -0.081 | 0.945 | 8.03E-01 | 8.03E+01 |  |  |
| 8010084 | ---          | ---          | ---                                                        | -0.006 | 0.996 | 9.85E-01 | 9.85E+01 |  |  |
| 8010086 | NM_00108051  | C17orf95     | chromosome 17 open reading frame                           | -0.162 | 0.894 | 1.59E-01 | 1.59E+01 |  |  |
| 8010092 | NM_024311    | MFSD11       | major facilitator superfamily domain                       | -0.038 | 0.974 | 8.57E-01 | 8.57E+01 |  |  |
| 8010113 | NM_144677    | MGAT5B       | mannosyl (alpha-1,6)-glycoprotein                          | -0.002 | 0.999 | 9.89E-01 | 9.89E+01 |  |  |
| 8010137 | NR_003013    | SCARNA16     | small Cajal body-specific RNA 16                           | -0.015 | 0.990 | 9.43E-01 | 9.43E+01 |  |  |
| 8010139 | NM_00114399  | SEC14L1      | SEC14-like 1 (S. cerevisiae)                               | 0.156  | 1.114 | 2.49E-01 | 2.49E+01 |  |  |
| 8010161 | NM_006640    | 40A30        | septin 9                                                   | -0.053 | 0.964 | 7.36E-01 | 7.36E+01 |  |  |
| 8010184 | ---          | ---          | ---                                                        | 0.222  | 1.166 | 5.32E-01 | 5.32E+01 |  |  |
| 8010188 | NM_00114264  | TNRC6C       | trinucleotide repeat containing 6C                         | -0.170 | 0.889 | 1.29E-01 | 1.29E+01 |  |  |
| 8010212 | NM_152468    | TMC8         | transmembrane channel-like 8                               | 0.000  | 1.000 | 1.00E+00 | 1.00E+02 |  |  |
| 8010237 | ENST00000340 | C17orf99     | chromosome 17 open reading frame                           | 0.028  | 1.020 | 8.18E-01 | 8.18E+01 |  |  |
| 8010243 | NM_004710    | SYNGR2       | synaptogyrin 2                                             | 0.121  | 1.087 | 5.21E-01 | 5.21E+01 |  |  |
| 8010248 | NM_00101098  | AFMID        | arylformamidase                                            | 0.023  | 1.016 | 8.96E-01 | 8.96E+01 |  |  |
| 8010260 | NM_001168    | BIRC5        | baculoviral IAP repeat-containing                          | 0.098  | 1.070 | 2.63E-01 | 2.63E+01 |  |  |
| 8010271 | NM_024419    | PGS1         | phosphatidylglycerophosphate synthase                      | -0.121 | 0.919 | 3.47E-01 | 3.47E+01 |  |  |
| 8010287 | NM_030968    | C1QTNF1      | C1q and tumor necrosis factor related                      | -0.157 | 0.897 | 2.41E-02 | 2.41E+00 |  |  |
| 8010295 | NM_00104257  | ENGASE       | endo-beta-N-acetylglucosaminidase                          | 0.017  | 1.012 | 9.09E-01 | 9.09E+01 |  |  |
| 8010313 | NM_178543    | ENPP7        | ectonucleotide pyrophosphatase/phosphodiesterase 7         | -0.010 | 0.993 | 9.73E-01 | 9.73E+01 |  |  |
| 8010320 | NM_005189    | CBX2         | chromobox homolog 2 (Pc class homeodomain)                 | -0.023 | 0.984 | 9.04E-01 | 9.04E+01 |  |  |
| 8010328 | NM_017950    | CCDC40       | coiled-coil domain containing 40                           | 0.005  | 1.003 | 9.78E-01 | 9.78E+01 |  |  |
| 8010354 | NM_000152    | GAA          | glucosidase, alpha; acid                                   | 0.007  | 1.005 | 9.80E-01 | 9.80E+01 |  |  |
| 8010379 | NM_024110    | CARD14       | caspase recruitment domain family 14                       | -0.071 | 0.952 | 3.18E-01 | 3.18E+01 |  |  |
| 8010405 | NM_173626    | SLC26A11     | solute carrier family 26, member 11                        | -0.080 | 0.946 | 3.09E-01 | 3.09E+01 |  |  |
| 8010426 | NM_020954    | KIAA1618     | KIAA1618                                                   | 0.048  | 1.034 | 8.07E-01 | 8.07E+01 |  |  |
| 8010454 | NM_020914    | RNF213       | ring finger protein 213                                    | 0.055  | 1.039 | 7.98E-01 | 7.98E+01 |  |  |
| 8010499 | AK096344     | FLJ35220     | hypothetical protein FLJ35220                              | -0.061 | 0.959 | 5.89E-01 | 5.89E+01 |  |  |
| 8010512 | NM_020761    | RPTOR        | regulatory associated protein of mTOR                      | -0.105 | 0.930 | 2.60E-01 | 2.60E+01 |  |  |
| 8010562 | NM_006340    | BAIAP2       | BAI1-associated protein 2                                  | -0.037 | 0.975 | 7.78E-01 | 7.78E+01 |  |  |
| 8010583 | NR_027255    | LOC388428    | hypothetical LOC388428                                     | -0.053 | 0.964 | 5.69E-01 | 5.69E+01 |  |  |
| 8010590 | NM_00108051  | BAHCC1       | BAH domain and coiled-coil containing 1                    | -0.021 | 0.986 | 8.48E-01 | 8.48E+01 |  |  |
| 8010614 | NM_012418    | FSCN2        | fascin homolog 2, actin-bundling protein                   | 0.063  | 1.044 | 7.51E-01 | 7.51E+01 |  |  |
| 8010624 | NM_031945    | TSPAN10      | tetraspanin 10                                             | -0.059 | 0.960 | 5.48E-01 | 5.48E+01 |  |  |
| 8010629 | NM_199287    | CCDC137      | coiled-coil domain containing 137                          | 0.021  | 1.015 | 8.75E-01 | 8.75E+01 |  |  |
| 8010638 | NM_004712    | HGS          | hepatocyte growth factor-regulated tyrosine kinase         | 0.038  | 1.026 | 7.46E-01 | 7.46E+01 |  |  |
| 8010664 | NM_002949    | MRPL12       | mitochondrial ribosomal protein L12                        | 0.001  | 1.000 | 9.98E-01 | 9.98E+01 |  |  |
| 8010673 | NM_012140    | SLC25A10     | solute carrier family 25 (mitochondrial)                   | 0.015  | 1.010 | 9.34E-01 | 9.34E+01 |  |  |
| 8010686 | NM_00100224  | ANAPC11      | anaphase promoting complex subunit 11                      | -0.006 | 0.996 | 9.83E-01 | 9.83E+01 |  |  |
| 8010696 | NM_148896    | NPB          | neuropeptide B                                             | -0.080 | 0.946 | 3.28E-01 | 3.28E+01 |  |  |
| 8010702 | NM_024083    | ASPSR1       | alveolar soft part sarcoma chromosome 17 breakpoint region | -0.011 | 0.992 | 9.55E-01 | 9.55E+01 |  |  |
| 8010719 | NM_144999    | LRRK45       | leucine rich repeat containing 45                          | -0.073 | 0.950 | 3.70E-01 | 3.70E+01 |  |  |
| 8010737 | NM_005052    | RAC3         | ras-related C3 botulinum toxin substrate 3                 | -0.045 | 0.969 | 7.16E-01 | 7.16E+01 |  |  |
| 8010747 | NM_212492    | GPS1         | G protein pathway suppressor 1                             | -0.036 | 0.976 | 7.23E-01 | 7.23E+01 |  |  |
| 8010766 | ---          | ---          | ---                                                        | 0.114  | 1.082 | 7.87E-01 | 7.87E+01 |  |  |
| 8010768 | ---          | ---          | ---                                                        | -0.018 | 0.987 | 9.65E-01 | 9.65E+01 |  |  |
| 8010770 | NM_00104242  | SLC16A3      | solute carrier family 16, member 3                         | -0.079 | 0.946 | 4.44E-01 | 4.44E+01 |  |  |
| 8010778 | NM_001893    | CSNK1D       | casein kinase 1, delta                                     | -0.057 | 0.961 | 7.29E-01 | 7.29E+01 |  |  |
| 8010783 | NM_018949    | UTS2R        | urotensin 2 receptor                                       | -0.030 | 0.979 | 8.20E-01 | 8.20E+01 |  |  |
| 8010787 | NM_173620    | HEXDC        | hexosaminidase (glycosyl hydrolase 20)                     | -0.030 | 0.979 | 7.97E-01 | 7.97E+01 |  |  |
| 8010804 | NM_00103861  | NARF         | nuclear prelamin A recognition factor                      | -0.104 | 0.931 | 1.65E-01 | 1.65E+01 |  |  |
| 8010820 | NM_004514    | FOXK2        | forkhead box K2                                            | 0.002  | 1.001 | 9.89E-01 | 9.89E+01 |  |  |
| 8010832 | NM_024619    | FN3KRP       | fructosamine 3 kinase related protein                      | -0.014 | 0.991 | 9.61E-01 | 9.61E+01 |  |  |
| 8010841 | NM_022158    | FN3K         | fructosamine 3 kinase                                      | -0.112 | 0.926 | 4.19E-01 | 4.19E+01 |  |  |
| 8010848 | NM_005993    | TBCD         | tubulin folding cofactor D                                 | -0.137 | 0.909 | 6.47E-02 | 6.47E+00 |  |  |
| 8010897 | NM_00100443  | METRNL       | meteorin, glial cell differentiation                       | 0.055  | 1.039 | 7.89E-01 | 7.89E+01 |  |  |
| 8010901 | NM_003585    | DOC2B        | double C2-like domains, beta                               | -0.182 | 0.882 | 1.83E-01 | 1.83E+01 |  |  |
| 8010903 | NM_006987    | RPH3AL       | rabphilin 3A-like (without C2 domain)                      | 0.076  | 1.054 | 4.02E-01 | 4.02E+01 |  |  |
| 8010915 | NM_182705    | FAM101B      | family with sequence similarity 10                         | 0.014  | 1.010 | 9.47E-01 | 9.47E+01 |  |  |
| 8010918 | NM_00112815  | VP53         | vacuolar protein sorting 53 homolog                        | -0.044 | 0.970 | 8.10E-01 | 8.10E+01 |  |  |
| 8010924 | NM_00112815  | VP53         | vacuolar protein sorting 53 homolog                        | 0.006  | 1.004 | 9.76E-01 | 9.76E+01 |  |  |
| 8010946 | NM_015721    | GEMIN4       | gem (nuclear organelle) associated protein 4               | -0.015 | 0.990 | 9.51E-01 | 9.51E+01 |  |  |
| 8010949 | NM_016080    | GLOD4        | glyoxalase domain containing 4                             | 0.030  | 1.021 | 8.46E-01 | 8.46E+01 |  |  |
| 8010963 | ---          | ---          | ---                                                        | 0.180  | 1.133 | 1.82E-01 | 1.82E+01 |  |  |

|         |              |              |                                                                    |        |       |          |          |  |
|---------|--------------|--------------|--------------------------------------------------------------------|--------|-------|----------|----------|--|
| 8010978 | ENST00000435 | LOC100130876 | hypothetical LOC100130876                                          | -0.098 | 0.934 | 7.79E-01 | 7.79E+01 |  |
| 8010983 | NM_021962    | ABR          | active BCR-related gene                                            | 0.190  | 1.140 | 3.36E-01 | 3.36E+01 |  |
| 8011011 | NR_024058    | YWHAE        | tyrosine 3-monooxygenase/tryptophan                                | 0.030  | 1.021 | 7.39E-01 | 7.39E+01 |  |
| 8011018 | NM_016823    | CRK          | v-crk sarcoma virus CT10 oncogen                                   | 0.123  | 1.089 | 1.75E-01 | 1.75E+01 |  |
| 8011027 | NM_00108077  | MYO1C        | myosin IC                                                          | -0.040 | 0.973 | 7.55E-01 | 7.55E+01 |  |
| 8011062 | NM_130766    | INPP5K       | inositol polyphosphate-5-phosphatase                               | -0.072 | 0.951 | 5.34E-01 | 5.34E+01 |  |
| 8011077 | NM_006224    | PITPNA       | phosphatidylinositol transfer protein                              | 0.110  | 1.079 | 6.06E-01 | 6.06E+01 |  |
| 8011093 | NM_152346    | SLC43A2      | solute carrier family 43, member 2                                 | 0.008  | 1.005 | 9.80E-01 | 9.80E+01 |  |
| 8011110 | ---          | ---          | ---                                                                | -0.164 | 0.892 | 4.96E-01 | 4.96E+01 |  |
| 8011112 | ---          | ---          | ---                                                                | -0.141 | 0.907 | 7.61E-01 | 7.61E+01 |  |
| 8011114 | NM_145351    | SCARF1       | scavenger receptor class F, member 1                               | -0.054 | 0.963 | 4.93E-01 | 4.93E+01 |  |
| 8011131 | NM_031430    | RILP         | Rab interacting lysosomal protein                                  | -0.047 | 0.968 | 7.38E-01 | 7.38E+01 |  |
| 8011141 | NM_006445    | PRPF8        | PRP8 pre-mRNA processing factor                                    | -0.077 | 0.948 | 3.55E-01 | 3.55E+01 |  |
| 8011188 | ENST00000330 | TLCD2        | TLC domain containing 2                                            | 0.024  | 1.017 | 8.23E-01 | 8.23E+01 |  |
| 8011193 | NM_032895    | C17orf91     | chromosome 17 open reading frame 91                                | -0.080 | 0.946 | 6.78E-01 | 6.78E+01 |  |
| 8011200 | NM_052928    | SMYD4        | SET and MYND domain containing 4                                   | -0.041 | 0.972 | 7.73E-01 | 7.73E+01 |  |
| 8011212 | NM_003001    | SDHC         | succinate dehydrogenase complex subunit C                          | -0.001 | 1.000 | 1.00E+00 | 1.00E+02 |  |
| 8011220 | ---          | ---          | ---                                                                | -0.119 | 0.921 | 1.75E-01 | 1.75E+01 |  |
| 8011222 | NM_017575    | SMG6         | Smg-6 homolog, nonsense mediated decay                             | -0.009 | 0.994 | 9.62E-01 | 9.62E+01 |  |
| 8011245 | NM_018128    | TSR1         | TSR1, 20S rRNA accumulation, human                                 | -0.005 | 0.997 | 9.84E-01 | 9.84E+01 |  |
| 8011262 | NM_020310    | MNT          | MAX binding protein                                                | -0.004 | 0.998 | 9.78E-01 | 9.78E+01 |  |
| 8011270 | ENST00000381 | LOC284009    | hypothetical protein LOC284009                                     | -0.086 | 0.942 | 4.83E-01 | 4.83E+01 |  |
| 8011291 | ---          | ---          | ---                                                                | 0.062  | 1.044 | 6.73E-01 | 6.73E+01 |  |
| 8011293 | NM_015229    | KIAA0664     | KIAA0664                                                           | 0.045  | 1.032 | 6.89E-01 | 6.89E+01 |  |
| 8011320 | NM_014566    | OR1D5        | olfactory receptor, family 1, subfamily 5                          | -0.120 | 0.920 | 4.21E-01 | 4.21E+01 |  |
| 8011328 | ---          | ---          | ---                                                                | -0.047 | 0.968 | 8.33E-01 | 8.33E+01 |  |
| 8011331 | NM_002551    | OR3A2        | olfactory receptor, family 3, subfamily 2                          | 0.024  | 1.017 | 8.99E-01 | 8.99E+01 |  |
| 8011375 | NM_080704    | TRPV1        | transient receptor potential cation channel, subfamily 1, member 1 | -0.083 | 0.944 | 4.78E-01 | 4.78E+01 |  |
| 8011396 | NM_013276    | SHPK         | sedoheptulokinase                                                  | -0.122 | 0.919 | 3.04E-01 | 3.04E+01 |  |
| 8011407 | NM_014604    | TAX1BP3      | Tax1 (human T-cell leukemia virus type 1) binding protein 3        | -0.116 | 0.923 | 1.20E-01 | 1.20E+01 |  |
| 8011415 | NM_002561    | P2RX5        | purinergic receptor P2X, ligand-gated ion channel subunit 5        | 0.003  | 1.002 | 9.92E-01 | 9.92E+01 |  |
| 8011430 | NM_002208    | ITGAE        | integrin, alpha E (antigen CD103, HLA-E)                           | -0.106 | 0.929 | 3.01E-01 | 3.01E+01 |  |
| 8011462 | NM_018553    | C17orf85     | chromosome 17 open reading frame 85                                | -0.251 | 0.841 | 8.90E-03 | 8.90E-01 |  |
| 8011499 | NM_002558    | P2RX1        | purinergic receptor P2X, ligand-gated ion channel subunit 1        | 0.094  | 1.067 | 1.24E-01 | 1.24E+01 |  |
| 8011516 | NM_174954    | ATP2A3       | ATPase, Ca++ transporting, ubiquitous                              | -0.017 | 0.988 | 8.83E-01 | 8.83E+01 |  |
| 8011542 | NM_015113    | ZZEF1        | zinc finger, ZZ-type with EF-hand domain                           | 0.080  | 1.057 | 4.09E-01 | 4.09E+01 |  |
| 8011599 | NM_016376    | ANKFY1       | ankyrin repeat and FYVE domain containing 1                        | 0.036  | 1.025 | 8.04E-01 | 8.04E+01 |  |
| 8011626 | NM_003342    | UBE2G1       | ubiquitin-conjugating enzyme E2G1                                  | 0.139  | 1.101 | 6.74E-02 | 6.74E+00 |  |
| 8011640 | NM_014520    | MYBBP1A      | MYB binding protein (P160) 1a                                      | 0.034  | 1.024 | 8.06E-01 | 8.06E+01 |  |
| 8011671 | NM_00112289  | GGT6         | gamma-glutamyltransferase 6                                        | -0.012 | 0.992 | 9.53E-01 | 9.53E+01 |  |
| 8011692 | NM_014389    | PELP1        | proline, glutamate and leucine rich repeat domain containing 1     | -0.052 | 0.964 | 6.78E-01 | 6.78E+01 |  |
| 8011713 | NM_022059    | CXCL16       | chemokine (C-X-C motif) ligand 16                                  | 0.406  | 1.325 | 4.04E-01 | 4.04E+01 |  |
| 8011734 | NM_000080    | CHRNE        | cholinergic receptor, nicotinic, epsilon 5                         | 0.011  | 1.008 | 9.44E-01 | 9.44E+01 |  |
| 8011747 | NM_003562    | SLC25A11     | solute carrier family 25 (mitochondrial) 11                        | 0.067  | 1.047 | 7.51E-01 | 7.51E+01 |  |
| 8011759 | NM_005022    | PFN1         | profilin 1                                                         | 0.075  | 1.054 | 4.25E-01 | 4.25E+01 |  |
| 8011765 | NM_004890    | SPAG7        | sperm associated antigen 7                                         | -0.098 | 0.934 | 3.75E-01 | 3.75E+01 |  |
| 8011774 | NM_015099    | CAMTA2       | calmodulin binding transcription activator 2                       | 0.054  | 1.038 | 6.04E-01 | 6.04E+01 |  |
| 8011797 | NM_213726    | INCA1        | inhibitor of CDK, cyclin A1 interacting                            | 0.000  | 1.000 | 9.99E-01 | 9.99E+01 |  |
| 8011808 | NM_00110457  | GPR172B      | G protein-coupled receptor 172B                                    | -0.051 | 0.965 | 5.52E-01 | 5.52E+01 |  |
| 8011823 | NM_032530    | ZNF594       | zinc finger protein 594                                            | 0.154  | 1.113 | 4.99E-01 | 4.99E+01 |  |
| 8011832 | NM_002532    | NUP88        | nucleoporin 88kDa                                                  | 0.047  | 1.033 | 7.68E-01 | 7.68E+01 |  |
| 8011850 | NM_001212    | C1QBP        | complement component 1, q subcomponent                             | -0.104 | 0.931 | 3.38E-01 | 3.38E+01 |  |
| 8011861 | NM_020162    | DHX33        | DEAH (Asp-Glu-Ala-His) box polypeptide 33                          | 0.042  | 1.029 | 8.19E-01 | 8.19E+01 |  |
| 8011875 | NM_016041    | DERL2        | Der1-like domain family, member 2                                  | 0.056  | 1.040 | 6.13E-01 | 6.13E+01 |  |
| 8011884 | NM_033004    | NLRP1        | NLR family, pyrin domain containing 1                              | -0.036 | 0.975 | 8.55E-01 | 8.55E+01 |  |
| 8011912 | NM_014336    | A1P1         | aryl hydrocarbon receptor interacting protein 1                    | -0.006 | 0.996 | 9.75E-01 | 9.75E+01 |  |
| 8011924 | NM_031220    | PITPNM3      | PITPNM family member 3                                             | 0.011  | 1.008 | 9.36E-01 | 9.36E+01 |  |
| 8011945 | NM_014804    | KIAA0753     | KIAA0753                                                           | -0.195 | 0.873 | 2.99E-02 | 2.99E+00 |  |
| 8011968 | NM_016060    | MED31        | mediator complex subunit 31                                        | -0.009 | 0.994 | 9.71E-01 | 9.71E+01 |  |
| 8011975 | NM_177550    | SLC13A5      | solute carrier family 13 (sodium-dependent) 5                      | -0.025 | 0.983 | 8.30E-01 | 8.30E+01 |  |
| 8012000 | NM_00100433  | RNASEK       | ribonuclease, RNase K                                              | 0.073  | 1.052 | 5.84E-01 | 5.84E+01 |  |
| 8012004 | ---          | ---          | ---                                                                | 0.019  | 1.013 | 8.97E-01 | 8.97E+01 |  |
| 8012006 | NM_153357    | SLC16A11     | solute carrier family 16, member 11                                | -0.049 | 0.967 | 6.06E-01 | 6.06E+01 |  |
| 8012028 | NM_080912    | ASGR2        | asialoglycoprotein receptor 2                                      | -0.006 | 0.996 | 9.76E-01 | 9.76E+01 |  |
| 8012043 | NM_001671    | ASGR1        | asialoglycoprotein receptor 1                                      | 0.004  | 1.003 | 9.84E-01 | 9.84E+01 |  |
| 8012054 | NM_001365    | DLG4         | discs, large homolog 4 (Drosophila)                                | 0.013  | 1.009 | 9.66E-01 | 9.66E+01 |  |
| 8012079 | NM_004422    | DVL2         | dishevelled, dsh homolog 2 (Drosophila)                            | -0.045 | 0.970 | 6.44E-01 | 6.44E+01 |  |
| 8012099 | NM_024297    | PHF23        | PHD finger protein 23                                              | 0.031  | 1.021 | 8.99E-01 | 8.99E+01 |  |
| 8012110 | NM_007278    | GABARAP      | GABA(A) receptor-associated protein                                | 0.248  | 1.188 | 1.40E-01 | 1.40E+01 |  |
| 8012116 | NM_015343    | DULLARD      | dullard homolog (Xenopus laevis)                                   | -0.030 | 0.979 | 8.57E-01 | 8.57E+01 |  |
| 8012126 | NM_001307    | CLDN7        | claudin 7                                                          | 0.035  | 1.025 | 7.82E-01 | 7.82E+01 |  |
| 8012140 | NM_015982    | YBX2         | Y box binding protein 2                                            | -0.041 | 0.972 | 7.04E-01 | 7.04E+01 |  |
| 8012150 | NM_004489    | GPS2         | G protein pathway suppressor 2                                     | -0.042 | 0.971 | 7.03E-01 | 7.03E+01 |  |
| 8012166 | NM_032442    | NEURL4       | neuronalized homolog 4 (Drosophila)                                | -0.037 | 0.975 | 7.97E-01 | 7.97E+01 |  |
| 8012197 | NM_020360    | PLSCR3       | phospholipid scramblase 3                                          | 0.004  | 1.002 | 9.85E-01 | 9.85E+01 |  |
| 8012207 | BC030270     | C17orf61     | chromosome 17 open reading frame 61                                | -0.068 | 0.954 | 6.82E-01 | 6.82E+01 |  |
| 8012212 | NM_020899    | ZBTB4        | zinc finger and BTB domain containing 4                            | -0.041 | 0.972 | 7.04E-01 | 7.04E+01 |  |

|         |             |              |                                      |        |       |          |          |  |  |
|---------|-------------|--------------|--------------------------------------|--------|-------|----------|----------|--|--|
| 8012218 | ---         | ---          | ---                                  | -0.013 | 0.991 | 9.67E-01 | 9.67E+01 |  |  |
| 8012220 | NM_006942   | SOX15        | SRY (sex determining region Y)-box   | -0.019 | 0.987 | 9.04E-01 | 9.04E+01 |  |  |
| 8012226 | NM_004860   | FXR2         | fragile X mental retardation, autos  | -0.023 | 0.984 | 8.68E-01 | 8.68E+01 |  |  |
| 8012247 | NM_133491   | SAT2         | spermidine/spermine N1-acetyltra     | -0.033 | 0.977 | 8.71E-01 | 8.71E+01 |  |  |
| 8012257 | NM_000546   | TP53         | tumor protein p53                    | -0.029 | 0.980 | 8.56E-01 | 8.56E+01 |  |  |
| 8012270 | ---         | ---          | ---                                  | 0.194  | 1.144 | 5.87E-01 | 5.87E+01 |  |  |
| 8012274 | NM_032356   | LSMD1        | LSM domain containing 1              | 0.014  | 1.010 | 9.49E-01 | 9.49E+01 |  |  |
| 8012304 | NM_021210   | TRAPPC1      | trafficking protein particle comple  | 0.066  | 1.047 | 6.93E-01 | 6.93E+01 |  |  |
| 8012309 | NM_001139   | ALOX12B      | arachidonate 12-lipoxygenase, 12     | -0.017 | 0.988 | 9.18E-01 | 9.18E+01 |  |  |
| 8012326 | NM_021628   | ALOXE3       | arachidonate lipoxygenase 3          | 0.041  | 1.029 | 6.99E-01 | 6.99E+01 |  |  |
| 8012344 | NM_032580   | HES7         | hairly and enhancer of split 7 (Dros | -0.043 | 0.970 | 5.56E-01 | 5.56E+01 |  |  |
| 8012349 | NM_002616   | PER1         | period homolog 1 (Drosophila)        | -0.050 | 0.966 | 6.09E-01 | 6.09E+01 |  |  |
| 8012376 | NM_014232   | VAMP2        | vesicle-associated membrane prot     | -0.081 | 0.945 | 6.25E-01 | 6.25E+01 |  |  |
| 8012383 | NM_032354   | TMEM107      | transmembrane protein 107            | 0.102  | 1.073 | 4.29E-01 | 4.29E+01 |  |  |
| 8012397 | NM_017622   | C17orf59     | chromosome 17 open reading fram      | -0.044 | 0.970 | 8.05E-01 | 8.05E+01 |  |  |
| 8012403 | NM_004217   | AURKB        | aurora kinase B                      | -0.038 | 0.974 | 8.04E-01 | 8.04E+01 |  |  |
| 8012416 | NR_026951   | C17orf44     | chromosome 17 open reading fram      | 0.008  | 1.006 | 9.80E-01 | 9.80E+01 |  |  |
| 8012423 | NM_025099   | C17orf68     | chromosome 17 open reading fram      | -0.028 | 0.981 | 8.24E-01 | 8.24E+01 |  |  |
| 8012450 | NM_201520   | SLC25A35     | solute carrier family 25, member 3   | 0.053  | 1.037 | 6.75E-01 | 6.75E+01 |  |  |
| 8012464 | NR_024447   | LOC100128288 | hypothetical protein LOC1001282      | 0.171  | 1.126 | 2.00E-01 | 2.00E+01 |  |  |
| 8012466 | NM_213597   | KRBA2        | KRAB-A domain containing 2           | -0.089 | 0.940 | 4.97E-01 | 4.97E+01 |  |  |
| 8012469 | NM_000987   | RPL26        | ribosomal protein L26                | -0.034 | 0.977 | 8.08E-01 | 8.08E+01 |  |  |
| 8012473 | NM_00114668 | RNF222       | ring finger protein 222              | -0.017 | 0.988 | 8.95E-01 | 8.95E+01 |  |  |
| 8012475 | NM_005964   | MYH10        | myosin, heavy chain 10, non-musc     | 0.000  | 1.000 | 1.00E+00 | 1.00E+02 |  |  |
| 8012528 | NM_00112807 | SPDYE4       | speedy homolog E4 (Xenopus laevis)   | -0.080 | 0.946 | 5.32E-01 | 5.32E+01 |  |  |
| 8012539 | NM_00101085 | PIK3R6       | phosphoinositide-3-kinase, regula    | 0.035  | 1.025 | 8.36E-01 | 8.36E+01 |  |  |
| 8012558 | NM_00114263 | PIK3R5       | phosphoinositide-3-kinase, regula    | 0.077  | 1.055 | 6.58E-01 | 6.58E+01 |  |  |
| 8012581 | NM_004853   | STX8         | syntaxin 8                           | 0.086  | 1.062 | 6.83E-01 | 6.83E+01 |  |  |
| 8012605 | NM_201433   | GAS7         | growth arrest-specific 7             | 0.257  | 1.195 | 6.71E-02 | 6.71E+00 |  |  |
| 8012787 | NM_002470   | MYH3         | myosin, heavy chain 3, skeletal mu   | -0.056 | 0.962 | 6.60E-01 | 6.60E+01 |  |  |
| 8012823 | NM_004589   | SCO1         | SCO cytochrome oxidase deficient     | 0.093  | 1.067 | 4.83E-01 | 4.83E+01 |  |  |
| 8012830 | NM_00100431 | TMEM220      | transmembrane protein 220            | 0.006  | 1.004 | 9.82E-01 | 9.82E+01 |  |  |
| 8012837 | NM_00110138 | hCG_1776018  | phosphoinositide-interacting regu    | -0.018 | 0.987 | 9.37E-01 | 9.37E+01 |  |  |
| 8012841 | ---         | ---          | ---                                  | 0.287  | 1.220 | 2.25E-01 | 2.25E+01 |  |  |
| 8012843 | NM_144680   | ZNF18        | zinc finger protein 18               | 0.007  | 1.005 | 9.78E-01 | 9.78E+01 |  |  |
| 8012852 | ---         | ---          | ---                                  | -0.017 | 0.988 | 9.68E-01 | 9.68E+01 |  |  |
| 8012856 | NM_018127   | ELAC2        | elaC homolog 2 (E. coli)             | -0.001 | 0.999 | 9.97E-01 | 9.97E+01 |  |  |
| 8012883 | NM_006042   | H53ST3A1     | heparan sulfate (glucosamine) 3-O    | 0.089  | 1.064 | 2.70E-01 | 2.70E+01 |  |  |
| 8012887 | NM_00100753 | CDRT15       | CMT1A duplicated region transcrip    | -0.010 | 0.993 | 9.58E-01 | 9.58E+01 |  |  |
| 8012891 | ---         | ---          | ---                                  | 0.044  | 1.031 | 8.57E-01 | 8.57E+01 |  |  |
| 8012896 | NM_000304   | PMP22        | peripheral myelin protein 22         | 0.259  | 1.197 | 7.34E-01 | 7.34E+01 |  |  |
| 8012918 | NM_173622   | CDRT4        | CMT1A duplicated region transcrip    | -0.035 | 0.976 | 9.25E-01 | 9.25E+01 |  |  |
| 8012924 | NM_145301   | FAM18B2      | family with sequence similarity 18   | -0.069 | 0.953 | 6.95E-01 | 6.95E+01 |  |  |
| 8012931 | NM_006382   | CDRT1        | CMT1A duplicated region transcrip    | 0.018  | 1.012 | 9.45E-01 | 9.45E+01 |  |  |
| 8012951 | NM_006382   | CDRT1        | CMT1A duplicated region transcrip    | -0.374 | 0.772 | 1.21E-01 | 1.21E+01 |  |  |
| 8012953 | NM_006470   | TRIM16       | tripartite motif-containing 16       | -0.096 | 0.935 | 6.27E-01 | 6.27E+01 |  |  |
| 8012958 | NM_014501   | UBE2S        | ubiquitin-conjugating enzyme E2S     | -0.107 | 0.929 | 3.94E-01 | 3.94E+01 |  |  |
| 8012961 | NM_006311   | NCOR1        | nuclear receptor co-repressor 1      | -0.020 | 0.986 | 8.97E-01 | 8.97E+01 |  |  |
| 8013013 | ---         | ---          | ---                                  | 0.098  | 1.070 | 6.14E-01 | 6.14E+01 |  |  |
| 8013015 | NM_181716   | CENPV        | centromere protein V                 | 0.013  | 1.009 | 9.54E-01 | 9.54E+01 |  |  |
| 8013022 | NM_00111356 | C17orf76     | chromosome 17 open reading fram      | 0.053  | 1.037 | 5.81E-01 | 5.81E+01 |  |  |
| 8013026 | NM_020653   | ZNF287       | zinc finger protein 287              | 0.019  | 1.014 | 9.53E-01 | 9.53E+01 |  |  |
| 8013035 | NM_020787   | ZNF624       | zinc finger protein 624              | -0.044 | 0.970 | 8.13E-01 | 8.13E+01 |  |  |
| 8013042 | NM_000422   | KRT17        | keratin 17                           | -0.010 | 0.993 | 9.44E-01 | 9.44E+01 |  |  |
| 8013049 | ---         | ---          | ---                                  | -0.002 | 0.999 | 9.91E-01 | 9.91E+01 |  |  |
| 8013061 | NM_012452   | TNFRSF13B    | tumor necrosis factor receptor sug   | 0.006  | 1.004 | 9.75E-01 | 9.75E+01 |  |  |
| 8013068 | NM_178836   | PLD6         | phospholipase D family, member 6     | 0.050  | 1.035 | 6.45E-01 | 6.45E+01 |  |  |
| 8013071 | NM_144997   | FLCN         | folliculin                           | 0.075  | 1.053 | 5.55E-01 | 5.55E+01 |  |  |
| 8013094 | NM_003653   | COP53        | COP9 constitutive photomorphoge      | 0.064  | 1.045 | 7.68E-01 | 7.68E+01 |  |  |
| 8013109 | ---         | ---          | ---                                  | -0.112 | 0.926 | 6.20E-01 | 6.20E+01 |  |  |
| 8013112 | NM_016084   | RASD1        | RAS, dexamethasone-induced 1         | -0.146 | 0.904 | 4.01E-02 | 4.01E+00 |  |  |
| 8013135 | NM_00100529 | SREBF1       | sterol regulatory element binding    | -0.045 | 0.970 | 6.42E-01 | 6.42E+01 |  |  |
| 8013157 | NM_00103355 | TOM1L2       | target of myb1-like 2 (chicken)      | 0.013  | 1.009 | 9.56E-01 | 9.56E+01 |  |  |
| 8013159 | NM_00108296 | TOM1L2       | target of myb1-like 2 (chicken)      | -0.004 | 0.997 | 9.85E-01 | 9.85E+01 |  |  |
| 8013179 | NM_145691   | ATPAF2       | ATP synthase mitochondrial F1 co     | 0.007  | 1.005 | 9.74E-01 | 9.74E+01 |  |  |
| 8013191 | NM_002018   | FLII         | flightless I homolog (Drosophila)    | 0.023  | 1.016 | 9.16E-01 | 9.16E+01 |  |  |
| 8013222 | NM_004618   | TOP3A        | topoisomerase (DNA) III alpha        | 0.056  | 1.039 | 7.35E-01 | 7.35E+01 |  |  |
| 8013243 | NM_004169   | SHMT1        | serine hydroxymethyltransferase 1    | 0.004  | 1.003 | 9.85E-01 | 9.85E+01 |  |  |
| 8013259 | ---         | ---          | ---                                  | -0.026 | 0.982 | 7.96E-01 | 7.96E+01 |  |  |
| 8013262 | NM_032582   | USP32        | ubiquitin specific peptidase 32      | 0.024  | 1.017 | 9.28E-01 | 9.28E+01 |  |  |
| 8013268 | NR_026809   | FAM106A      | family with sequence similarity 10   | 0.041  | 1.029 | 9.11E-01 | 9.11E+01 |  |  |
| 8013272 | NM_014695   | CCDC144A     | coiled-coil domain containing 144    | 0.097  | 1.069 | 8.17E-01 | 8.17E+01 |  |  |
| 8013294 | NM_00103939 | TBC1D28      | TBC1 domain family, member 28        | -0.023 | 0.984 | 9.02E-01 | 9.02E+01 |  |  |
| 8013307 | NR_026718   | FOXO3B       | forkhead box O3B pseudogene          | -0.226 | 0.855 | 5.58E-02 | 5.58E+00 |  |  |
| 8013323 | NR_006880   | SNORD3A      | small nucleolar RNA, C/D box 3A      | -0.508 | 0.703 | 8.15E-02 | 8.15E+00 |  |  |
| 8013325 | NR_006880   | SNORD3A      | small nucleolar RNA, C/D box 3A      | -0.508 | 0.703 | 8.15E-02 | 8.15E+00 |  |  |
| 8013327 | AK026312    | LOC79999     | hypothetical LOC79999                | -0.049 | 0.966 | 6.31E-01 | 6.31E+01 |  |  |

|         |              |              |                                        |        |       |          |          |  |  |
|---------|--------------|--------------|----------------------------------------|--------|-------|----------|----------|--|--|
| 8013329 | NR_006880    | SNORD3A      | small nucleolar RNA, C/D box 3A        | -0.508 | 0.703 | 8.15E-02 | 8.15E+00 |  |  |
| 8013331 | NM_015681    | B9D1         | B9 protein domain 1                    | -0.006 | 0.996 | 9.70E-01 | 9.70E+01 |  |  |
| 8013348 | NM_002952    | RPS2         | ribosomal protein S2                   | 0.006  | 1.004 | 9.76E-01 | 9.76E+01 |  |  |
| 8013354 | ---          | ---          | ---                                    | 0.003  | 1.002 | 9.95E-01 | 9.95E+01 |  |  |
| 8013384 | NM_000691    | ALDH3A1      | aldehyde dehydrogenase 3 family,       | -0.035 | 0.976 | 6.94E-01 | 6.94E+01 |  |  |
| 8013399 | NM_014683    | ULK2         | unc-51-like kinase 2 (C. elegans)      | -0.075 | 0.950 | 5.52E-01 | 5.52E+01 |  |  |
| 8013431 | NM_007202    | AKAP10       | A kinase (PRKA) anchor protein 10      | 0.136  | 1.099 | 1.51E-01 | 1.51E+01 |  |  |
| 8013465 | NM_005557    | KRT16        | keratin 16                             | -0.049 | 0.967 | 5.72E-01 | 5.72E+01 |  |  |
| 8013473 | AK127974     | LOC339240    | keratin pseudogene                     | -0.007 | 0.995 | 9.78E-01 | 9.78E+01 |  |  |
| 8013479 | NM_00100430  | CCDC144NL    | coiled-coil domain containing 144      | 0.000  | 1.000 | 9.99E-01 | 9.99E+01 |  |  |
| 8013486 | NM_015276    | USP22        | ubiquitin specific peptidase 22        | -0.069 | 0.953 | 4.80E-01 | 4.80E+01 |  |  |
| 8013500 | NM_003876    | TMEM11       | transmembrane protein 11               | -0.047 | 0.968 | 8.13E-01 | 8.13E+01 |  |  |
| 8013507 | ---          | ---          | ---                                    | 0.068  | 1.048 | 6.14E-01 | 6.14E+01 |  |  |
| 8013509 | NM_152914    | C17orf103    | chromosome 17 open reading fram        | -0.101 | 0.932 | 2.35E-01 | 2.35E+01 |  |  |
| 8013515 | AK096256     | C17orf51     | chromosome 17 open reading fram        | -0.165 | 0.892 | 2.91E-01 | 2.91E+01 |  |  |
| 8013521 | ---          | ---          | ---                                    | 0.156  | 1.114 | 5.53E-01 | 5.53E+01 |  |  |
| 8013533 | ---          | ---          | ---                                    | 0.006  | 1.004 | 9.76E-01 | 9.76E+01 |  |  |
| 8013536 | NM_000625    | NOS2         | nitric oxide synthase 2, inducible     | 0.044  | 1.031 | 6.66E-01 | 6.66E+01 |  |  |
| 8013574 | AK097823     | FLJ40504     | keratin 18 pseudogene                  | -0.003 | 0.998 | 9.89E-01 | 9.89E+01 |  |  |
| 8013581 | NM_174887    | IFT20        | intraflagellar transport 20 homolo     | -0.018 | 0.988 | 9.33E-01 | 9.33E+01 |  |  |
| 8013588 | NM_015584    | POLDIP2      | polymerase (DNA-directed), delta       | 0.009  | 1.007 | 9.73E-01 | 9.73E+01 |  |  |
| 8013606 | NM_000638    | VTN          | vitronectin                            | 0.005  | 1.003 | 9.80E-01 | 9.80E+01 |  |  |
| 8013616 | NM_080669    | SLC46A1      | solute carrier family 46 (folate tra   | 0.150  | 1.109 | 1.82E-01 | 1.82E+01 |  |  |
| 8013622 | NM_144610    | FLJ25006     | uncharacterized serine/threonine-      | 0.017  | 1.012 | 9.17E-01 | 9.17E+01 |  |  |
| 8013633 | NM_054035    | UNC119       | unc-119 homolog (C. elegans)           | -0.107 | 0.929 | 3.93E-01 | 3.93E+01 |  |  |
| 8013641 | NM_033198    | PIGS         | phosphatidylinositol glycan ancho      | 0.027  | 1.019 | 8.69E-01 | 8.69E+01 |  |  |
| 8013660 | NM_005165    | ALDOC        | aldolase C, fructose-bisphosphate      | 0.047  | 1.033 | 8.47E-01 | 8.47E+01 |  |  |
| 8013696 | NM_014680    | KIAA0100     | KIAA0100                               | 0.118  | 1.085 | 1.28E-01 | 1.28E+01 |  |  |
| 8013741 | NM_006923    | SDF2         | stromal cell-derived factor 2          | 0.007  | 1.005 | 9.82E-01 | 9.82E+01 |  |  |
| 8013747 | NM_152465    | PROCA1       | protein interacting with cyclin A1     | 0.020  | 1.014 | 9.09E-01 | 9.09E+01 |  |  |
| 8013753 | NM_031934    | RAB34        | RAB34, member RAS oncogene fa          | -0.043 | 0.970 | 8.63E-01 | 8.63E+01 |  |  |
| 8013771 | NM_138463    | TLCD1        | TLC domain containing 1                | -0.138 | 0.909 | 3.49E-01 | 3.49E+01 |  |  |
| 8013776 | NM_018182    | C17orf63     | chromosome 17 open reading fram        | -0.087 | 0.942 | 3.96E-01 | 3.96E+01 |  |  |
| 8013788 | NM_004475    | FLOT2        | flotillin 2                            | -0.055 | 0.963 | 7.62E-01 | 7.62E+01 |  |  |
| 8013804 | NM_144683    | DHRS13       | dehydrogenase/reductase (SDR fa        | -0.024 | 0.983 | 8.73E-01 | 8.73E+01 |  |  |
| 8013812 | NM_00103356  | PHF12        | PHD finger protein 12                  | -0.084 | 0.943 | 5.06E-01 | 5.06E+01 |  |  |
| 8013833 | NM_178860    | SEZ6         | seizure related 6 homolog (mouse       | 0.003  | 1.002 | 9.89E-01 | 9.89E+01 |  |  |
| 8013858 | ENST00000437 | LOC100130794 | NADH dehydrogenase (ubiquinone         | -0.117 | 0.922 | 3.31E-01 | 3.31E+01 |  |  |
| 8013860 | NM_078471    | MYO18A       | myosin XVIIIa                          | -0.060 | 0.959 | 5.06E-01 | 5.06E+01 |  |  |
| 8013906 | NM_002822    | TWF1         | twinstillin, actin-binding protein, ho | 0.030  | 1.021 | 9.01E-01 | 9.01E+01 |  |  |
| 8013908 | NM_020772    | NUFIP2       | nuclear fragile X mental retardatio    | 0.022  | 1.016 | 8.26E-01 | 8.26E+01 |  |  |
| 8013915 | ---          | ---          | ---                                    | 0.051  | 1.036 | 7.47E-01 | 7.47E+01 |  |  |
| 8013919 | NM_198147    | ABHD15       | abhydrolase domain containing 15       | 0.023  | 1.016 | 9.00E-01 | 9.00E+01 |  |  |
| 8013923 | NM_00108545  | GIT1         | G protein-coupled receptor kinase      | -0.032 | 0.978 | 8.45E-01 | 8.45E+01 |  |  |
| 8013947 | NM_032854    | CORO6        | coronin 6                              | 0.043  | 1.030 | 7.51E-01 | 7.51E+01 |  |  |
| 8013965 | NM_033389    | SSH2         | slingshot homolog 2 (Drosophila)       | 0.050  | 1.035 | 6.78E-01 | 6.78E+01 |  |  |
| 8013985 | ---          | ---          | ---                                    | 0.012  | 1.008 | 9.68E-01 | 9.68E+01 |  |  |
| 8014008 | NM_000386    | BLMH         | bleomycin hydrolase                    | -0.171 | 0.888 | 9.22E-02 | 9.22E+00 |  |  |
| 8014035 | ---          | ---          | ---                                    | 0.037  | 1.026 | 7.88E-01 | 7.88E+01 |  |  |
| 8014037 | NM_015986    | CRLF3        | cytokine receptor-like factor 3        | 0.121  | 1.088 | 1.09E-01 | 1.09E+01 |  |  |
| 8014063 | NM_006495    | EVI2B        | ecotropic viral integration site 2B    | 0.092  | 1.066 | 4.77E-01 | 4.77E+01 |  |  |
| 8014066 | NM_00100392  | EVI2A        | ecotropic viral integration site 2A    | 0.043  | 1.030 | 8.43E-01 | 8.43E+01 |  |  |
| 8014073 | NM_018405    | C17orf79     | chromosome 17 open reading fram        | 0.034  | 1.024 | 8.39E-01 | 8.39E+01 |  |  |
| 8014081 | NM_018428    | UTP6         | UTP6, small subunit (SSU) process      | 0.108  | 1.078 | 3.62E-01 | 3.62E+01 |  |  |
| 8014100 | NM_022344    | C17orf75     | chromosome 17 open reading fram        | -0.148 | 0.903 | 4.84E-01 | 4.84E+01 |  |  |
| 8014140 | ---          | ---          | ---                                    | -0.152 | 0.900 | 6.80E-01 | 6.80E+01 |  |  |
| 8014160 | NM_002981    | CCL1         | chemokine (C-C motif) ligand 1         | -0.251 | 0.840 | 2.17E-01 | 2.17E+01 |  |  |
| 8014189 | NM_057178    | RFFL         | ring finger and FYVE-like domain c     | -0.121 | 0.919 | 1.57E-01 | 1.57E+01 |  |  |
| 8014197 | ---          | ---          | ---                                    | -0.131 | 0.913 | 8.04E-01 | 8.04E+01 |  |  |
| 8014199 | NM_002878    | RAD51L3      | RAD51-like 3 (S. cerevisiae)           | -0.022 | 0.985 | 9.00E-01 | 9.00E+01 |  |  |
| 8014214 | NM_00101444  | NLE1         | notchless homolog 1 (Drosophila)       | 0.070  | 1.050 | 4.45E-01 | 4.45E+01 |  |  |
| 8014230 | NM_152462    | AMAC1        | acyl-malonyl condensing enzyme 1       | -0.047 | 0.968 | 8.63E-01 | 8.63E+01 |  |  |
| 8014233 | NM_00110458  | SLFN11       | schlafen family member 11              | 0.282  | 1.216 | 1.94E-01 | 1.94E+01 |  |  |
| 8014241 | NM_018042    | SLFN12       | schlafen family member 12              | 0.123  | 1.089 | 5.38E-01 | 5.38E+01 |  |  |
| 8014248 | NM_144682    | SLFN13       | schlafen family member 13              | -0.077 | 0.948 | 8.29E-01 | 8.29E+01 |  |  |
| 8014257 | NM_00114502  | SLFN12L      | schlafen family member 12-like         | 0.011  | 1.008 | 9.82E-01 | 9.82E+01 |  |  |
| 8014264 | NM_000286    | PEX12        | peroxisomal biogenesis factor 12       | -0.050 | 0.966 | 7.46E-01 | 7.46E+01 |  |  |
| 8014269 | NM_139285    | GAS2L2       | growth arrest-specific 2 like 2        | -0.033 | 0.977 | 7.38E-01 | 7.38E+01 |  |  |
| 8014282 | NM_024302    | MMP28        | matrix metalloproteinase 28            | -0.058 | 0.961 | 5.34E-01 | 5.34E+01 |  |  |
| 8014298 | NM_152781    | C17orf66     | chromosome 17 open reading fram        | -0.094 | 0.937 | 6.31E-01 | 6.31E+01 |  |  |
| 8014316 | NM_002985    | CCL5         | chemokine (C-C motif) ligand 5         | -0.010 | 0.993 | 9.85E-01 | 9.85E+01 |  |  |
| 8014326 | NM_145654    | RDM1         | RAD52 motif 1                          | -0.058 | 0.961 | 7.91E-01 | 7.91E+01 |  |  |
| 8014349 | NR_027921    | CCL14-CCL15  | chemokine ligand 14, chemokine l       | -0.010 | 0.993 | 9.69E-01 | 9.69E+01 |  |  |
| 8014376 | NM_00100141  | TBC1D3B      | TBC1 domain family, member 3B          | -0.003 | 0.998 | 9.88E-01 | 9.88E+01 |  |  |
| 8014397 | NM_00100141  | TBC1D3C      | TBC1 domain family, member 3C          | 0.010  | 1.007 | 9.70E-01 | 9.70E+01 |  |  |
| 8014420 | NM_00112339  | TBC1D3D      | TBC1 domain family, member 3D          | 0.017  | 1.012 | 9.51E-01 | 9.51E+01 |  |  |
| 8014437 | NM_00104028  | TBC1D3G      | TBC1 domain family, member 3G          | 0.011  | 1.008 | 9.66E-01 | 9.66E+01 |  |  |

|         |             |           |                                     |        |       |          |          |  |  |
|---------|-------------|-----------|-------------------------------------|--------|-------|----------|----------|--|--|
| 8014452 | ---         | ---       | ---                                 | 0.034  | 1.024 | 9.44E-01 | 9.44E+01 |  |  |
| 8014454 | NM_025109   | MYO19     | myosin XIX                          | 0.010  | 1.007 | 9.75E-01 | 9.75E+01 |  |  |
| 8014485 | ---         | ---       | ---                                 | 0.070  | 1.050 | 7.43E-01 | 7.43E+01 |  |  |
| 8014487 | NM_198839   | ACACA     | acetyl-Coenzyme A carboxylase al    | 0.031  | 1.021 | 8.54E-01 | 8.54E+01 |  |  |
| 8014551 | NM_007247   | SYNRG     | synergin, gamma                     | 0.070  | 1.050 | 4.35E-01 | 4.35E+01 |  |  |
| 8014574 | NM_007010   | DDX52     | DEAD (Asp-Glu-Ala-Asp) box polyp    | 0.023  | 1.016 | 9.20E-01 | 9.20E+01 |  |  |
| 8014603 | NM_00112339 | TBC1D3    | TBC1 domain family, member 3        | 0.008  | 1.006 | 9.77E-01 | 9.77E+01 |  |  |
| 8014633 | NM_00112339 | TBC1D3D   | TBC1 domain family, member 3D       | 0.012  | 1.009 | 9.64E-01 | 9.64E+01 |  |  |
| 8014650 | NM_006310   | NPEPPS    | aminopeptidase puromycin sensiti    | -0.017 | 0.989 | 9.22E-01 | 9.22E+01 |  |  |
| 8014664 | ---         | ---       | ---                                 | 0.026  | 1.019 | 9.67E-01 | 9.67E+01 |  |  |
| 8014666 | NM_00100433 | GPR179    | G protein-coupled receptor 179      | -0.019 | 0.987 | 8.63E-01 | 8.63E+01 |  |  |
| 8014679 | NM_025248   | SNIP      | SNAP25-interacting protein          | 0.020  | 1.014 | 9.07E-01 | 9.07E+01 |  |  |
| 8014702 | NM_005937   | MLLT6     | myeloid/lymphoid or mixed-lineag    | 0.101  | 1.073 | 6.94E-01 | 6.94E+01 |  |  |
| 8014704 | ---         | ---       | ---                                 | -0.063 | 0.957 | 8.63E-01 | 8.63E+01 |  |  |
| 8014706 | NM_007144   | PCGF2     | polycomb group ring finger 2        | 0.042  | 1.029 | 7.30E-01 | 7.30E+01 |  |  |
| 8014723 | NM_003559   | PIP4K2B   | phosphatidylinositol-5-phosphate    | -0.095 | 0.936 | 3.07E-01 | 3.07E+01 |  |  |
| 8014738 | NM_017748   | CCDC49    | coiled-coil domain containing 49    | -0.155 | 0.898 | 7.90E-02 | 7.90E+00 |  |  |
| 8014749 | NM_000978   | RPL23     | ribosomal protein L23               | 0.023  | 1.016 | 9.02E-01 | 9.02E+01 |  |  |
| 8014755 | NR_002576   | SNORA21   | small nucleolar RNA, H/ACA box 2    | -0.163 | 0.893 | 5.89E-01 | 5.89E+01 |  |  |
| 8014768 | NM_020405   | PLXDC1    | plexin domain containing 1          | 0.008  | 1.005 | 9.72E-01 | 9.72E+01 |  |  |
| 8014794 | NM_199247   | CACNB1    | calcium channel, voltage-depende    | 0.032  | 1.022 | 8.48E-01 | 8.48E+01 |  |  |
| 8014812 | NM_198993   | STAC2     | SH3 and cysteine rich domain 2      | -0.008 | 0.994 | 9.64E-01 | 9.64E+01 |  |  |
| 8014825 | NM_032875   | FBXL20    | F-box and leucine-rich repeat prot  | -0.150 | 0.901 | 1.95E-01 | 1.95E+01 |  |  |
| 8014841 | NM_004774   | MED1      | mediator complex subunit 1          | -0.039 | 0.973 | 7.97E-01 | 7.97E+01 |  |  |
| 8014861 | ---         | ---       | ---                                 | 0.430  | 1.347 | 3.56E-01 | 3.56E+01 |  |  |
| 8014865 | NM_006160   | NEUROD2   | neurogenic differentiation 2        | 0.048  | 1.034 | 6.29E-01 | 6.29E+01 |  |  |
| 8014882 | NM_032339   | C17orf37  | chromosome 17 open reading fram     | 0.037  | 1.026 | 7.91E-01 | 7.91E+01 |  |  |
| 8014891 | NM_012481   | IKZF3     | IKAROS family zinc finger 3 (Aiolos | -0.123 | 0.918 | 4.23E-01 | 4.23E+01 |  |  |
| 8014903 | NM_00104247 | GSDMB     | gasdermin B                         | -0.129 | 0.914 | 5.94E-01 | 5.94E+01 |  |  |
| 8014916 | NM_139280   | ORMDL3    | ORM1-like 3 (S. cerevisiae)         | -0.089 | 0.940 | 4.95E-01 | 4.95E+01 |  |  |
| 8014925 | NM_014815   | MED24     | mediator complex subunit 24         | 0.057  | 1.040 | 5.90E-01 | 5.90E+01 |  |  |
| 8014956 | NM_021724   | NR1D1     | nuclear receptor subfamily 1, grou  | 0.051  | 1.036 | 7.57E-01 | 7.57E+01 |  |  |
| 8014969 | NM_152219   | GJD3      | gap junction protein, delta 3, 31.9 | 0.011  | 1.007 | 9.52E-01 | 9.52E+01 |  |  |
| 8014974 | NM_001067   | TOP2A     | topoisomerase (DNA) II alpha 170    | 0.413  | 1.331 | 8.00E-02 | 8.00E+00 |  |  |
| 8015016 | NM_032865   | TNS4      | tensin 4                            | -0.060 | 0.959 | 3.95E-01 | 3.95E+01 |  |  |
| 8015031 | NM_001838   | CCR7      | chemokine (C-C motif) receptor 7    | -0.277 | 0.825 | 1.31E-02 | 1.31E+00 |  |  |
| 8015039 | NM_003079   | SMARCE1   | SWI/SNF related, matrix associate   | -0.062 | 0.958 | 4.13E-01 | 4.13E+01 |  |  |
| 8015173 | NM_031958   | KRTAP3-1  | keratin associated protein 3-1      | -0.007 | 0.995 | 9.56E-01 | 9.56E+01 |  |  |
| 8015179 | NM_031957   | KRTAP1-5  | keratin associated protein 1-5      | -0.030 | 0.979 | 7.70E-01 | 7.70E+01 |  |  |
| 8015187 | NM_030967   | KRTAP1-1  | keratin associated protein 1-1      | 0.026  | 1.018 | 8.69E-01 | 8.69E+01 |  |  |
| 8015189 | NM_030966   | KRTAP1-3  | keratin associated protein 1-3      | -0.003 | 0.998 | 9.82E-01 | 9.82E+01 |  |  |
| 8015196 | NM_030967   | KRTAP1-1  | keratin associated protein 1-1      | 0.005  | 1.004 | 9.63E-01 | 9.63E+01 |  |  |
| 8015206 | NM_00112338 | KRTAP2-1  | keratin associated protein 2-1      | -0.043 | 0.971 | 4.82E-01 | 4.82E+01 |  |  |
| 8015208 | NM_00112338 | KRTAP2-1  | keratin associated protein 2-1      | -0.049 | 0.967 | 4.32E-01 | 4.32E+01 |  |  |
| 8015210 | NM_033184   | KRTAP2-4  | keratin associated protein 2-4      | -0.036 | 0.975 | 5.54E-01 | 5.54E+01 |  |  |
| 8015214 | NM_033184   | KRTAP2-4  | keratin associated protein 2-4      | -0.028 | 0.981 | 6.76E-01 | 6.76E+01 |  |  |
| 8015218 | NM_031960   | KRTAP4-8  | keratin associated protein 4-8      | 0.003  | 1.002 | 9.83E-01 | 9.83E+01 |  |  |
| 8015221 | NM_033059   | KRTAP4-11 | keratin associated protein 4-11     | 0.000  | 1.000 | 1.00E+00 | 1.00E+02 |  |  |
| 8015223 | NM_031854   | KRTAP4-12 | keratin associated protein 4-12     | 0.002  | 1.001 | 9.88E-01 | 9.88E+01 |  |  |
| 8015230 | NM_033059   | KRTAP4-11 | keratin associated protein 4-11     | -0.003 | 0.998 | 9.84E-01 | 9.84E+01 |  |  |
| 8015232 | NM_033188   | KRTAP4-5  | keratin associated protein 4-5      | -0.032 | 0.978 | 8.20E-01 | 8.20E+01 |  |  |
| 8015236 | NM_032524   | KRTAP4-4  | keratin associated protein 4-4      | -0.012 | 0.992 | 9.43E-01 | 9.43E+01 |  |  |
| 8015240 | NM_033187   | KRTAP4-3  | keratin associated protein 4-3      | 0.031  | 1.022 | 8.33E-01 | 8.33E+01 |  |  |
| 8015242 | NM_033062   | KRTAP4-2  | keratin associated protein 4-2      | -0.041 | 0.972 | 6.58E-01 | 6.58E+01 |  |  |
| 8015247 | NM_033060   | KRTAP4-1  | keratin associated protein 4-1      | 0.086  | 1.061 | 3.56E-01 | 3.56E+01 |  |  |
| 8015252 | NM_031964   | KRTAP17-1 | keratin associated protein 17-1     | -0.049 | 0.966 | 7.27E-01 | 7.27E+01 |  |  |
| 8015257 | NM_004138   | KRT33A    | keratin 33A                         | -0.030 | 0.980 | 8.61E-01 | 8.61E+01 |  |  |
| 8015262 | NM_002279   | KRT33B    | keratin 33B                         | -0.057 | 0.961 | 6.80E-01 | 6.80E+01 |  |  |
| 8015301 | NM_002280   | KRT35     | keratin 35                          | -0.045 | 0.969 | 7.68E-01 | 7.68E+01 |  |  |
| 8015323 | NM_153490   | KRT13     | keratin 13                          | -0.045 | 0.969 | 7.02E-01 | 7.02E+01 |  |  |
| 8015349 | NM_002276   | KRT19     | keratin 19                          | -0.020 | 0.986 | 9.15E-01 | 9.15E+01 |  |  |
| 8015366 | NM_000526   | KRT14     | keratin 14                          | -0.121 | 0.920 | 2.52E-01 | 2.52E+01 |  |  |
| 8015376 | NM_005557   | KRT16     | keratin 16                          | -0.074 | 0.950 | 3.37E-01 | 3.37E+01 |  |  |
| 8015387 | NM_000422   | KRT17     | keratin 17                          | -0.008 | 0.995 | 9.62E-01 | 9.62E+01 |  |  |
| 8015396 | NM_177977   | HAP1      | huntingtin-associated protein 1     | -0.045 | 0.969 | 7.26E-01 | 7.26E+01 |  |  |
| 8015410 | ---         | ---       | ---                                 | -0.031 | 0.979 | 8.27E-01 | 8.27E+01 |  |  |
| 8015412 | NM_002230   | JUP       | junction plakoglobin                | 0.061  | 1.043 | 3.54E-01 | 3.54E+01 |  |  |
| 8015445 | NM_052935   | NT5C3L    | 5'-nucleotidase, cytosolic III-like | -0.037 | 0.975 | 8.90E-01 | 8.90E+01 |  |  |
| 8015456 | NM_018143   | KLHL11    | kelch-like 11 (Drosophila)          | -0.083 | 0.944 | 6.19E-01 | 6.19E+01 |  |  |
| 8015460 | NM_001096   | ACLY      | ATP citrate lyase                   | -0.024 | 0.984 | 8.65E-01 | 8.65E+01 |  |  |
| 8015490 | NM_003315   | DNAJC7    | DnaJ (Hsp40) homolog, subfamily     | -0.031 | 0.979 | 8.80E-01 | 8.80E+01 |  |  |
| 8015503 | BC080613    | ZNF385C   | zinc finger protein 385C            | -0.013 | 0.991 | 9.53E-01 | 9.53E+01 |  |  |
| 8015511 | NM_024119   | DHX58     | DEXH (Asp-Glu-X-His) box polypep    | 0.028  | 1.019 | 8.81E-01 | 8.81E+01 |  |  |
| 8015526 | NM_021078   | KAT2A     | K[lysine] acetyltransferase 2A      | 0.062  | 1.044 | 6.50E-01 | 6.50E+01 |  |  |
| 8015545 | NM_201434   | RAB5C     | RAB5C, member RAS oncogene fa       | 0.173  | 1.127 | 3.94E-01 | 3.94E+01 |  |  |
| 8015554 | NM_012285   | KCNH4     | potassium voltage-gated channel,    | -0.029 | 0.980 | 8.06E-01 | 8.06E+01 |  |  |
| 8015572 | NM_001524   | HCRT      | hypocretin (orexin) neuropeptide    | -0.004 | 0.997 | 9.81E-01 | 9.81E+01 |  |  |

|         |             |              |                                      |        |       |          |          |  |  |
|---------|-------------|--------------|--------------------------------------|--------|-------|----------|----------|--|--|
| 8015575 | NR_024573   | GHDC         | GH3 domain containing                | -0.025 | 0.983 | 8.26E-01 | 8.26E+01 |  |  |
| 8015590 | NM_012448   | STAT5B       | signal transducer and activator of   | -0.118 | 0.921 | 2.46E-01 | 2.46E+01 |  |  |
| 8015607 | NM_139276   | STAT3        | signal transducer and activator of   | 0.026  | 1.018 | 8.93E-01 | 8.93E+01 |  |  |
| 8015642 | NM_016556   | PSMC3IP      | PSMC3 interacting protein            | 0.049  | 1.034 | 8.08E-01 | 8.08E+01 |  |  |
| 8015655 | NM_178126   | FAM134C      | family with sequence similarity 13   | -0.040 | 0.973 | 7.77E-01 | 7.77E+01 |  |  |
| 8015665 | NM_024927   | PLEKHH3      | pleckstrin homology domain conta     | -0.091 | 0.939 | 2.72E-01 | 2.72E+01 |  |  |
| 8015681 | NM_016602   | CCR10        | chemokine (C-C motif) receptor 10    | -0.020 | 0.986 | 9.27E-01 | 9.27E+01 |  |  |
| 8015685 | NM_001991   | EZH1         | enhancer of zeste homolog 1 (Dro     | -0.082 | 0.945 | 4.59E-01 | 4.59E+01 |  |  |
| 8015706 | NR_024461   | LOC100190938 | hypothetical LOC100190938            | -0.061 | 0.959 | 5.38E-01 | 5.38E+01 |  |  |
| 8015712 | NM_00104043 | CCDC56       | coiled-coil domain containing 56     | -0.009 | 0.994 | 9.77E-01 | 9.77E+01 |  |  |
| 8015715 | NM_003766   | BECN1        | beclin 1, autophagy related          | -0.018 | 0.988 | 9.26E-01 | 9.26E+01 |  |  |
| 8015730 | NR_027254   | LOC388387    | hypothetical LOC388387               | 0.011  | 1.008 | 9.53E-01 | 9.53E+01 |  |  |
| 8015737 | ---         | ---          | ---                                  | 0.007  | 1.005 | 9.73E-01 | 9.73E+01 |  |  |
| 8015741 | NM_00113604 | AARSD1       | alanyl-tRNA synthetase domain co     | 0.066  | 1.047 | 6.76E-01 | 6.76E+01 |  |  |
| 8015757 | ---         | ---          | ---                                  | 0.052  | 1.037 | 8.55E-01 | 8.55E+01 |  |  |
| 8015759 | NM_006373   | VAT1         | vesicle amine transport protein 1    | -0.010 | 0.993 | 9.65E-01 | 9.65E+01 |  |  |
| 8015796 | ---         | ---          | ---                                  | -0.525 | 0.695 | 9.72E-02 | 9.72E+00 |  |  |
| 8015798 | NR_027413   | LOC100130581 | hypothetical LOC100130581            | 0.015  | 1.011 | 9.72E-01 | 9.72E+01 |  |  |
| 8015804 | ---         | ---          | ---                                  | -0.014 | 0.990 | 9.53E-01 | 9.53E+01 |  |  |
| 8015821 | NM_004527   | MEOX1        | mesenchyme homeobox 1                | 0.032  | 1.022 | 7.91E-01 | 7.91E+01 |  |  |
| 8015827 | NM_025237   | SOST         | sclerosteosis                        | 0.005  | 1.003 | 9.84E-01 | 9.84E+01 |  |  |
| 8015835 | NM_004090   | DUSP3        | dual specificity phosphatase 3       | 0.268  | 1.204 | 1.11E-01 | 1.11E+01 |  |  |
| 8015846 | NR_003562   | MPP3         | membrane protein, palmitoylated      | -0.024 | 0.983 | 8.81E-01 | 8.81E+01 |  |  |
| 8015890 | NM_004160   | PYY          | peptide YY                           | 0.011  | 1.008 | 9.60E-01 | 9.60E+01 |  |  |
| 8015900 | NM_032376   | TMEM101      | transmembrane protein 101            | -0.027 | 0.981 | 8.34E-01 | 8.34E+01 |  |  |
| 8015908 | NM_152344   | LSM12        | LSM12 homolog (S. cerevisiae)        | 0.059  | 1.042 | 5.06E-01 | 5.06E+01 |  |  |
| 8015914 | NM_005474   | HDAC5        | histone deacetylase 5                | -0.013 | 0.991 | 9.01E-01 | 9.01E+01 |  |  |
| 8015946 | NM_178542   | C17orf65     | chromosome 17 open reading fram      | -0.036 | 0.975 | 8.18E-01 | 8.18E+01 |  |  |
| 8015955 | NM_020218   | ATXN7L3      | ataxin 7-like 3                      | -0.036 | 0.975 | 8.32E-01 | 8.32E+01 |  |  |
| 8015969 | NM_014233   | UBTF         | upstream binding transcription fac   | 0.057  | 1.041 | 5.30E-01 | 5.30E+01 |  |  |
| 8016016 | ---         | ---          | ---                                  | 0.030  | 1.021 | 8.77E-01 | 8.77E+01 |  |  |
| 8016018 | NM_00114378 | SLC25A39     | solute carrier family 25, member 3   | -0.031 | 0.979 | 8.32E-01 | 8.32E+01 |  |  |
| 8016033 | NM_198475   | FAM171A2     | family with sequence similarity 17   | -0.103 | 0.931 | 2.29E-01 | 2.29E+01 |  |  |
| 8016044 | NM_000419   | ITGA2B       | integrin, alpha 2b (platelet glycop  | -0.005 | 0.997 | 9.76E-01 | 9.76E+01 |  |  |
| 8016077 | NM_00100290 | GPATCH8      | G patch domain containing 8          | -0.074 | 0.950 | 4.07E-01 | 4.07E+01 |  |  |
| 8016086 | ---         | ---          | ---                                  | -0.005 | 0.997 | 9.85E-01 | 9.85E+01 |  |  |
| 8016088 | NM_144609   | CCDC43       | coiled-coil domain containing 43     | 0.106  | 1.076 | 5.89E-01 | 5.89E+01 |  |  |
| 8016094 | NM_005497   | GJC1         | gap junction protein, gamma 1, 45    | -0.009 | 0.994 | 9.61E-01 | 9.61E+01 |  |  |
| 8016099 | NM_004247   | EFTUD2       | elongation factor Tu GTP binding d   | 0.137  | 1.099 | 1.45E-01 | 1.45E+01 |  |  |
| 8016128 | NM_002055   | GFAP         | glial fibrillary acidic protein      | -0.012 | 0.992 | 9.35E-01 | 9.35E+01 |  |  |
| 8016139 | NM_00108044 | KIF18B       | kinesin family member 18B            | 0.012  | 1.008 | 9.54E-01 | 9.54E+01 |  |  |
| 8016147 | NM_00108044 | KIF18B       | kinesin family member 18B            | -0.021 | 0.986 | 9.07E-01 | 9.07E+01 |  |  |
| 8016155 | NM_006688   | C1QL1        | complement component 1, q subc       | -0.060 | 0.959 | 5.38E-01 | 5.38E+01 |  |  |
| 8016159 | NM_024819   | DCAKD        | dephospho-CoA kinase domain co       | -0.104 | 0.930 | 4.44E-01 | 4.44E+01 |  |  |
| 8016168 | NM_133373   | PLCD3        | phospholipase C, delta 3             | -0.082 | 0.945 | 1.97E-01 | 1.97E+01 |  |  |
| 8016187 | NM_152343   | C17orf46     | chromosome 17 open reading fram      | -0.018 | 0.987 | 9.33E-01 | 9.33E+01 |  |  |
| 8016194 | NM_003954   | MAP3K14      | mitogen-activated protein kinase f   | -0.027 | 0.981 | 8.31E-01 | 8.31E+01 |  |  |
| 8016213 | ---         | ---          | ---                                  | 0.084  | 1.060 | 7.87E-01 | 7.87E+01 |  |  |
| 8016215 | NM_199282   | ARHGAP27     | Rho GTPase activating protein 27     | 0.059  | 1.042 | 4.49E-01 | 4.49E+01 |  |  |
| 8016232 | NM_174919   | SH3D20       | SH3 domain containing 20             | -0.004 | 0.997 | 9.84E-01 | 9.84E+01 |  |  |
| 8016239 | NR_027774   | PLEKHM1      | pleckstrin homology domain conta     | -0.065 | 0.956 | 7.97E-01 | 7.97E+01 |  |  |
| 8016245 | NR_002940   | LRRC37A4     | leucine rich repeat containing 37,   | -0.018 | 0.987 | 9.55E-01 | 9.55E+01 |  |  |
| 8016257 | ---         | ---          | ---                                  | 0.003  | 1.002 | 9.90E-01 | 9.90E+01 |  |  |
| 8016259 | NM_00100660 | LRRC37A2     | leucine rich repeat containing 37,   | -0.034 | 0.977 | 8.88E-01 | 8.88E+01 |  |  |
| 8016261 | NM_005456   | MAPK8IP1     | mitogen-activated protein kinase i   | -0.087 | 0.941 | 1.95E-01 | 1.95E+01 |  |  |
| 8016266 | NM_015443   | KIAA1267     | KIAA1267                             | -0.038 | 0.974 | 7.34E-01 | 7.34E+01 |  |  |
| 8016285 | NM_00111373 | ARL17P1      | ADP-ribosylation factor-like 17 pse  | 0.015  | 1.010 | 9.70E-01 | 9.70E+01 |  |  |
| 8016300 | NM_00111373 | ARL17P1      | ADP-ribosylation factor-like 17 pse  | 0.013  | 1.009 | 9.77E-01 | 9.77E+01 |  |  |
| 8016311 | NM_030753   | WNT3         | wingless-type MMTV integration s     | 0.033  | 1.023 | 8.57E-01 | 8.57E+01 |  |  |
| 8016320 | NM_203400   | RPRML        | reprimin-like                        | -0.092 | 0.938 | 2.82E-01 | 2.82E+01 |  |  |
| 8016324 | NM_00111409 | CDC27        | cell division cycle 27 homolog (S. c | 0.108  | 1.078 | 3.29E-01 | 3.29E+01 |  |  |
| 8016336 | NM_145798   | OSBPL7       | oxysterol binding protein-like 7     | -0.071 | 0.952 | 4.29E-01 | 4.29E+01 |  |  |
| 8016366 | NM_145255   | MRPL10       | mitochondrial ribosomal protein L    | 0.025  | 1.017 | 8.99E-01 | 8.99E+01 |  |  |
| 8016371 | NM_00114502 | SCRN2        | secernin 2                           | -0.005 | 0.997 | 9.78E-01 | 9.78E+01 |  |  |
| 8016382 | NM_199262   | SP6          | Sp6 transcription factor             | -0.081 | 0.946 | 4.04E-01 | 4.04E+01 |  |  |
| 8016390 | NM_016429   | COPZ2        | coatamer protein complex, subun      | 0.049  | 1.034 | 7.27E-01 | 7.27E+01 |  |  |
| 8016400 | ---         | ---          | ---                                  | -0.039 | 0.973 | 8.12E-01 | 8.12E+01 |  |  |
| 8016402 | NM_00112722 | CBX1         | chromobox homolog 1 (HP1 beta f      | -0.009 | 0.994 | 9.63E-01 | 9.63E+01 |  |  |
| 8016412 | ---         | ---          | ---                                  | 0.086  | 1.061 | 7.65E-01 | 7.65E+01 |  |  |
| 8016414 | NM_003726   | SKAP1        | src kinase associated phosphoprot    | 0.042  | 1.029 | 8.96E-01 | 8.96E+01 |  |  |
| 8016429 | ---         | ---          | ---                                  | 0.106  | 1.076 | 6.31E-01 | 6.31E+01 |  |  |
| 8016433 | NM_002144   | HOXB1        | homeobox B1                          | -0.068 | 0.954 | 5.34E-01 | 5.34E+01 |  |  |
| 8016444 | NM_002146   | HOXB3        | homeobox B3                          | -0.107 | 0.928 | 3.19E-01 | 3.19E+01 |  |  |
| 8016452 | NM_024015   | HOXB4        | homeobox B4                          | -0.021 | 0.985 | 9.13E-01 | 9.13E+01 |  |  |
| 8016468 | NM_004502   | HOXB7        | homeobox B7                          | 0.063  | 1.045 | 4.96E-01 | 4.96E+01 |  |  |
| 8016482 | ---         | ---          | ---                                  | 0.028  | 1.020 | 8.39E-01 | 8.39E+01 |  |  |
| 8016487 | NM_006361   | HOXB13       | homeobox B13                         | 0.058  | 1.041 | 5.47E-01 | 5.47E+01 |  |  |



|         |             |              |                                       |        |       |          |          |
|---------|-------------|--------------|---------------------------------------|--------|-------|----------|----------|
| 8016508 | NM_007241   | SNF8         | SNF8, ESCRT-II complex subunit, h     | 0.062  | 1.044 | 6.75E-01 | 6.75E+01 |
| 8016532 | NM_031498   | GNGT2        | guanine nucleotide binding protein    | 0.173  | 1.127 | 4.47E-01 | 4.47E+01 |
| 8016540 | NM_00114380 | PHOSPHO1     | phosphatase, orphan 1                 | -0.084 | 0.944 | 4.19E-01 | 4.19E+01 |
| 8016546 | NM_014897   | ZNF652       | zinc finger protein 652               | -0.040 | 0.973 | 7.86E-01 | 7.86E+01 |
| 8016552 | NM_002634   | PHB          | prohibitin                            | -0.038 | 0.974 | 8.85E-01 | 8.85E+01 |
| 8016562 | NM_00100723 | SPOP         | speckle-type POZ protein              | -0.005 | 0.997 | 9.81E-01 | 9.81E+01 |
| 8016578 | NM_005827   | SLC35B1      | solute carrier family 35, member 6    | 0.220  | 1.165 | 2.84E-02 | 2.84E+00 |
| 8016590 | NM_030802   | FAM117A      | family with sequence similarity 11    | -0.003 | 0.998 | 9.87E-01 | 9.87E+01 |
| 8016600 | NM_170685   | TAC4         | tachykinin 4 (hemokinin)              | 0.021  | 1.015 | 9.00E-01 | 9.00E+01 |
| 8016607 | ---         | ---          | ---                                   | -0.047 | 0.968 | 8.36E-01 | 8.36E+01 |
| 8016615 | NM_174920   | SAMD14       | sterile alpha motif domain contain    | -0.017 | 0.989 | 9.02E-01 | 9.02E+01 |
| 8016628 | NM_032595   | PPP1R9B      | protein phosphatase 1, regulatory     | 0.126  | 1.091 | 2.11E-01 | 2.11E+01 |
| 8016640 | NR_024193   | HILS1        | histone linker H1 domain, spermat     | -0.028 | 0.981 | 8.71E-01 | 8.71E+01 |
| 8016646 | NM_000088   | COL1A1       | collagen, type I, alpha 1             | -0.056 | 0.962 | 3.24E-01 | 3.24E+01 |
| 8016699 | NM_016504   | MRPL27       | mitochondrial ribosomal protein L     | 0.091  | 1.065 | 4.39E-01 | 4.39E+01 |
| 8016708 | NM_018509   | LRRCS9       | leucine rich repeat containing 59     | 0.073  | 1.052 | 4.92E-01 | 4.92E+01 |
| 8016718 | NM_001267   | CHAD         | chondroadherin                        | -0.084 | 0.944 | 4.70E-01 | 4.70E+01 |
| 8016725 | NM_052855   | ANKRD40      | ankyrin repeat domain 40              | -0.066 | 0.955 | 6.35E-01 | 6.35E+01 |
| 8016733 | NM_016424   | LUC7L3       | LUC7-like 3 (S. cerevisiae)           | -0.020 | 0.986 | 9.19E-01 | 9.19E+01 |
| 8016739 | NM_005749   | TOB1         | transducer of ERBB2, 1                | -0.019 | 0.987 | 9.44E-01 | 9.44E+01 |
| 8016745 | NM_00113052 | SPAG9        | sperm associated antigen 9            | 0.028  | 1.020 | 8.78E-01 | 8.78E+01 |
| 8016787 | ---         | ---          | ---                                   | -0.003 | 0.998 | 9.89E-01 | 9.89E+01 |
| 8016789 | NM_017643   | MBTD1        | mbt domain containing 1               | 0.100  | 1.072 | 3.56E-01 | 3.56E+01 |
| 8016806 | ---         | ---          | ---                                   | 0.016  | 1.011 | 9.49E-01 | 9.49E+01 |
| 8016832 | NM_012329   | MMD          | monocyte to macrophage differen       | 0.037  | 1.026 | 8.66E-01 | 8.66E+01 |
| 8016847 | NM_005082   | TRIM25       | tripartite motif-containing 25        | -0.024 | 0.983 | 9.50E-01 | 9.50E+01 |
| 8016858 | NM_004645   | COIL         | collin                                | 0.065  | 1.046 | 7.33E-01 | 7.33E+01 |
| 8016870 | NM_016070   | MRPS23       | mitochondrial ribosomal protein S     | -0.009 | 0.994 | 9.77E-01 | 9.77E+01 |
| 8016878 | NM_017949   | CUEDC1       | CUE domain containing 1               | 0.010  | 1.007 | 9.51E-01 | 9.51E+01 |
| 8016891 | NM_007146   | VEZF1        | vascular endothelial zinc finger 1    | -0.041 | 0.972 | 7.58E-01 | 7.58E+01 |
| 8016898 | NM_00107816 | SFRS1        | splicing factor, arginine/serine-rich | -0.021 | 0.985 | 8.47E-01 | 8.47E+01 |
| 8016947 | NM_004758   | BZRAP1       | benzodiazapine receptor (periphe      | -0.101 | 0.932 | 1.48E-01 | 1.48E+01 |
| 8016980 | ---         | ---          | ---                                   | -0.014 | 0.990 | 9.83E-01 | 9.83E+01 |
| 8016982 | NM_003168   | SUPT4H1      | suppressor of Ty 4 homolog 1 (S. c    | 0.015  | 1.010 | 9.16E-01 | 9.16E+01 |
| 8016994 | NM_017763   | RNF43        | ring finger protein 43                | -0.006 | 0.996 | 9.78E-01 | 9.78E+01 |
| 8017010 | NM_00108043 | HSF5         | heat shock transcription factor fam   | 0.110  | 1.079 | 2.26E-01 | 2.26E+01 |
| 8017019 | NM_004687   | MTMR4        | myotubularin related protein 4        | 0.063  | 1.045 | 6.30E-01 | 6.30E+01 |
| 8017039 | NM_080415   | 40A25        | septin 4                              | 0.104  | 1.075 | 1.85E-01 | 1.85E+01 |
| 8017102 | ---         | ---          | ---                                   | -0.056 | 0.962 | 6.89E-01 | 6.89E+01 |
| 8017106 | NM_015294   | TRIM37       | tripartite motif-containing 37        | 0.009  | 1.006 | 9.76E-01 | 9.76E+01 |
| 8017133 | NM_182620   | SKA2         | spindle and kinetochore associate     | 0.234  | 1.176 | 2.29E-01 | 2.29E+01 |
| 8017143 | NM_016077   | PTRH2        | peptidyl-tRNA hydrolase 2             | 0.026  | 1.018 | 9.10E-01 | 9.10E+01 |
| 8017162 | NM_016125   | RNFT1        | ring finger protein, transmembran     | 0.096  | 1.069 | 4.84E-01 | 4.84E+01 |
| 8017173 | NR_027486   | TBC1D3P2     | TBC1 domain family, member 3 ps       | -0.013 | 0.991 | 9.45E-01 | 9.45E+01 |
| 8017186 | NM_022070   | HEATR6       | HEAT repeat containing 6              | 0.059  | 1.042 | 7.96E-01 | 7.96E+01 |
| 8017212 | NM_032582   | USP32        | ubiquitin specific peptidase 32       | 0.009  | 1.006 | 9.77E-01 | 9.77E+01 |
| 8017235 | NM_006380   | APPBP2       | amyloid beta precursor protein (c     | 0.050  | 1.035 | 7.94E-01 | 7.94E+01 |
| 8017251 | ---         | ---          | ---                                   | 0.082  | 1.058 | 7.83E-01 | 7.83E+01 |
| 8017253 | ---         | ---          | ---                                   | -0.020 | 0.986 | 9.40E-01 | 9.40E+01 |
| 8017257 | ---         | ---          | ---                                   | 0.291  | 1.223 | 5.30E-01 | 5.30E+01 |
| 8017283 | NR_026641   | INTS2        | integrator complex subunit 2          | -0.015 | 0.990 | 9.62E-01 | 9.62E+01 |
| 8017312 | NM_005121   | MED13        | mediator complex subunit 13           | -0.092 | 0.938 | 2.12E-01 | 2.12E+01 |
| 8017344 | AK123839    | LOC100129112 | hypothetical protein LOC10012911      | 0.014  | 1.010 | 9.77E-01 | 9.77E+01 |
| 8017346 | NR_027486   | TBC1D3P2     | TBC1 domain family, member 3 ps       | -0.019 | 0.987 | 9.00E-01 | 9.00E+01 |
| 8017361 | ---         | ---          | ---                                   | 0.020  | 1.014 | 9.49E-01 | 9.49E+01 |
| 8017378 | NM_001915   | CYB561       | cytochrome b-561                      | -0.005 | 0.997 | 9.84E-01 | 9.84E+01 |
| 8017393 | NM_030576   | LIMD2        | LIM domain containing 2               | 0.025  | 1.017 | 8.18E-01 | 8.18E+01 |
| 8017402 | NM_153335   | STRADA       | STE20-related kinase adaptor alph     | -0.003 | 0.998 | 9.85E-01 | 9.85E+01 |
| 8017421 | NM_020198   | CCDC47       | coiled-coil domain containing 47      | 0.085  | 1.061 | 6.70E-01 | 6.70E+01 |
| 8017437 | NM_017647   | FTSJ3        | FtsJ homolog 3 (E. coli)              | -0.120 | 0.920 | 2.93E-01 | 2.93E+01 |
| 8017460 | NM_00109842 | SMARCD2      | SWI/SNF related, matrix associate     | -0.036 | 0.975 | 8.05E-01 | 8.05E+01 |
| 8017476 | NM_022644   | CSH2         | chorionic somatomammotropin h         | -0.132 | 0.912 | 2.36E-01 | 2.36E+01 |
| 8017488 | NM_022640   | CSH1         | chorionic somatomammotropin h         | 0.000  | 1.000 | 1.00E+00 | 1.00E+02 |
| 8017499 | NM_022579   | CSHL1        | chorionic somatomammotropin h         | 0.028  | 1.019 | 7.81E-01 | 7.81E+01 |
| 8017511 | NM_000626   | CD79B        | CD79b molecule, immunoglobulin        | 0.154  | 1.112 | 2.56E-02 | 2.56E+00 |
| 8017521 | NM_000334   | SCN4A        | sodium channel, voltage-gated, ty     | 0.048  | 1.034 | 6.87E-01 | 6.87E+01 |
| 8017547 | NM_00109978 | ICAM2        | intercellular adhesion molecule 2     | 0.035  | 1.025 | 8.36E-01 | 8.36E+01 |
| 8017555 | NM_001433   | ERN1         | endoplasmic reticulum to nucleus      | -0.114 | 0.924 | 8.87E-02 | 8.87E+00 |
| 8017582 | NM_018469   | TEX2         | testis expressed 2                    | 0.014  | 1.009 | 9.53E-01 | 9.53E+01 |
| 8017621 | NM_007215   | POLG2        | polymerase (DNA directed), gamm       | 0.058  | 1.041 | 6.89E-01 | 6.89E+01 |
| 8017634 | NM_004396   | DDX5         | DEAD (Asp-Glu-Ala-Asp) box polyp      | -0.002 | 0.999 | 9.90E-01 | 9.90E+01 |
| 8017651 | NM_022739   | SMURF2       | SMAD specific E3 ubiquitin protei     | 0.070  | 1.050 | 5.77E-01 | 5.77E+01 |
| 8017671 | NR_026899   | LOC146880    | hypothetical LOC146880                | -0.023 | 0.984 | 8.98E-01 | 8.98E+01 |
| 8017675 | NR_024386   | PLEKHM1P     | pleckstrin homology domain conta      | -0.023 | 0.984 | 9.03E-01 | 9.03E+01 |
| 8017688 | NM_199340   | LRRCS7A3     | leucine rich repeat containing 37,    | 0.016  | 1.011 | 9.52E-01 | 9.52E+01 |
| 8017702 | ---         | ---          | ---                                   | 0.057  | 1.041 | 8.62E-01 | 8.62E+01 |
| 8017704 | NR_026903   | FLJ32065     | hypothetical protein FLJ32065         | 0.034  | 1.024 | 9.36E-01 | 9.36E+01 |

|         |              |             |                                       |        |       |          |          |  |  |
|---------|--------------|-------------|---------------------------------------|--------|-------|----------|----------|--|--|
| 8017711 | NM_006572    | GNA13       | guanine nucleotide binding protein    | 0.106  | 1.076 | 4.04E-01 | 4.04E+01 |  |  |
| 8017718 | NM_004655    | AXIN2       | axin 2                                | -0.034 | 0.977 | 8.21E-01 | 8.21E+01 |  |  |
| 8017776 | NM_014877    | HELZ        | helicase with zinc finger             | 0.059  | 1.042 | 5.16E-01 | 5.16E+01 |  |  |
| 8017810 | NM_002816    | PSMD12      | proteasome (prosome, macropain)       | -0.066 | 0.955 | 5.27E-01 | 5.27E+01 |  |  |
| 8017825 | ---          | ---         | ---                                   | 0.141  | 1.103 | 6.73E-01 | 6.73E+01 |  |  |
| 8017829 | ---          | ---         | ---                                   | -0.232 | 0.851 | 1.91E-01 | 1.91E+01 |  |  |
| 8017840 | ENST00000443 | LRRC37A4    | leucine rich repeat containing 37,    | 0.030  | 1.021 | 9.17E-01 | 9.17E+01 |  |  |
| 8017843 | NM_004694    | SLC16A6     | solute carrier family 16, member 6    | 0.100  | 1.072 | 9.07E-01 | 9.07E+01 |  |  |
| 8017850 | NM_017983    | WIP1        | WD repeat domain, phosphoinositid     | 0.096  | 1.069 | 7.23E-01 | 7.23E+01 |  |  |
| 8017867 | NM_017565    | FAM20A      | family with sequence similarity 20    | 0.298  | 1.229 | 1.07E-01 | 1.07E+01 |  |  |
| 8018082 | NM_00115977  | SLC39A11    | solute carrier family 39 (metal ion   | 0.097  | 1.070 | 7.70E-01 | 7.70E+01 |  |  |
| 8018097 | NM_00109883  | FAM104A     | family with sequence similarity 10    | -0.061 | 0.959 | 4.29E-01 | 4.29E+01 |  |  |
| 8018107 | NM_012121    | CDC42EP4    | CDC42 effector protein (Rho GTPa      | -0.032 | 0.978 | 8.39E-01 | 8.39E+01 |  |  |
| 8018164 | BC093631     | KIF19       | kinesin family member 19              | -0.002 | 0.998 | 9.89E-01 | 9.89E+01 |  |  |
| 8018169 | NM_174892    | CD300LB     | CD300 molecule-like family memb       | 0.183  | 1.135 | 7.87E-02 | 7.87E+00 |  |  |
| 8018177 | NM_006678    | CD300C      | CD300c molecule                       | 0.072  | 1.051 | 6.28E-01 | 6.28E+01 |  |  |
| 8018189 | NM_181449    | CD300E      | CD300e molecule                       | -0.011 | 0.993 | 9.83E-01 | 9.83E+01 |  |  |
| 8018196 | NM_139018    | CD300LF     | CD300 molecule-like family memb       | 0.212  | 1.158 | 1.62E-01 | 1.62E+01 |  |  |
| 8018209 | NM_015654    | NAT9        | N-acetyltransferase 9 (GCN5-relat     | 0.039  | 1.027 | 8.45E-01 | 8.45E+01 |  |  |
| 8018220 | NM_000835    | GRIN2C      | glutamate receptor, ionotropic, N-    | -0.012 | 0.991 | 9.23E-01 | 9.23E+01 |  |  |
| 8018236 | NM_024417    | FDXR        | ferredoxin reductase                  | -0.066 | 0.956 | 3.20E-01 | 3.20E+01 |  |  |
| 8018251 | NM_178128    | FADS6       | fatty acid desaturase domain fami     | 0.053  | 1.038 | 6.75E-01 | 6.75E+01 |  |  |
| 8018258 | NM_173477    | USH1G       | Usher syndrome 1G (autosomal re       | -0.012 | 0.992 | 9.49E-01 | 9.49E+01 |  |  |
| 8018264 | NM_030630    | C17orf28    | chromosome 17 open reading fram       | -0.006 | 0.996 | 9.77E-01 | 9.77E+01 |  |  |
| 8018288 | NM_006356    | ATP5H       | ATP synthase, H+ transporting, mi     | 0.006  | 1.004 | 9.80E-01 | 9.80E+01 |  |  |
| 8018297 | NM_014595    | NT5C        | 5', 3'-nucleotidase, cytosolic        | -0.021 | 0.985 | 9.00E-01 | 9.00E+01 |  |  |
| 8018305 | NM_016185    | HN1         | hematological and neurological ex     | 0.045  | 1.032 | 7.38E-01 | 7.38E+01 |  |  |
| 8018315 | NM_006937    | SUMO2       | SMT3 suppressor of mif two 3 hor      | -0.014 | 0.990 | 9.23E-01 | 9.23E+01 |  |  |
| 8018324 | NM_138619    | GGA3        | golgi associated, gamma adaptin e     | 0.015  | 1.011 | 8.97E-01 | 8.97E+01 |  |  |
| 8018343 | NM_020679    | MIF4GD      | MIF4G domain containing               | -0.023 | 0.984 | 8.78E-01 | 8.78E+01 |  |  |
| 8018352 | NM_00112612  | SLC25A19    | solute carrier family 25 (mitochon    | 0.211  | 1.157 | 6.92E-02 | 6.92E+00 |  |  |
| 8018364 | NM_002086    | GRB2        | growth factor receptor-bound pro      | 0.233  | 1.175 | 5.67E-02 | 5.67E+00 |  |  |
| 8018377 | ---          | ---         | ---                                   | -0.049 | 0.967 | 7.87E-01 | 7.87E+01 |  |  |
| 8018379 | NM_020753    | CASKIN2     | CASK interacting protein 2            | 0.009  | 1.006 | 9.55E-01 | 9.55E+01 |  |  |
| 8018400 | NM_004259    | RECQL5      | RecQ protein-like 5                   | -0.040 | 0.973 | 6.84E-01 | 6.84E+01 |  |  |
| 8018428 | NM_000154    | GALK1       | galactokinase 1                       | -0.030 | 0.980 | 7.83E-01 | 7.83E+01 |  |  |
| 8018439 | NM_005324    | H3F3B       | H3 histone, family 3B (H3.3B)         | -0.088 | 0.941 | 4.19E-01 | 4.19E+01 |  |  |
| 8018445 | NM_00108041  | UNK         | unkempt homolog (Drosophila)          | -0.026 | 0.982 | 8.86E-01 | 8.86E+01 |  |  |
| 8018449 | NM_199242    | UNC13D      | unc-13 homolog D (C. elegans)         | 0.011  | 1.008 | 9.35E-01 | 9.35E+01 |  |  |
| 8018482 | NM_012478    | WBP2        | WW domain binding protein 2           | 0.005  | 1.003 | 9.86E-01 | 9.86E+01 |  |  |
| 8018494 | NM_033452    | TRIM47      | tripartite motif-containing 47        | -0.001 | 1.000 | 9.97E-01 | 9.97E+01 |  |  |
| 8018502 | NM_173547    | TRIM65      | tripartite motif-containing 65        | -0.079 | 0.947 | 3.16E-01 | 3.16E+01 |  |  |
| 8018511 | NM_032478    | MRPL38      | mitochondrial ribosomal protein L     | -0.041 | 0.972 | 7.44E-01 | 7.44E+01 |  |  |
| 8018522 | NM_00108054  | FBF1        | Fas (TNFRSF6) binding factor 1        | -0.002 | 0.998 | 9.85E-01 | 9.85E+01 |  |  |
| 8018558 | NM_004035    | ACOX1       | acyl-Coenzyme A oxidase 1, palmit     | 0.090  | 1.064 | 7.20E-01 | 7.20E+01 |  |  |
| 8018579 | NM_001988    | EVPL        | envoplakin                            | 0.005  | 1.004 | 9.81E-01 | 9.81E+01 |  |  |
| 8018600 | NM_014230    | SRP68       | signal recognition particle 68kDa     | -0.055 | 0.962 | 6.86E-01 | 6.86E+01 |  |  |
| 8018620 | NM_00114529  | EXOC7       | exocyst complex component 7           | -0.060 | 0.959 | 6.07E-01 | 6.07E+01 |  |  |
| 8018646 | NM_001454    | FOXJ1       | forkhead box J1                       | -0.042 | 0.972 | 7.83E-01 | 7.83E+01 |  |  |
| 8018652 | NM_052916    | RNF157      | ring finger protein 157               | 0.116  | 1.083 | 5.83E-01 | 5.83E+01 |  |  |
| 8018673 | NM_032134    | QRICH2      | glutamine rich 2                      | -0.093 | 0.938 | 3.62E-01 | 3.62E+01 |  |  |
| 8018694 | NM_002766    | PRPSAP1     | phosphoribosyl pyrophosphate sy       | -0.136 | 0.910 | 2.72E-01 | 2.72E+01 |  |  |
| 8018708 | NM_022066    | UBE2O       | ubiquitin-conjugating enzyme E2C      | -0.114 | 0.924 | 1.05E-01 | 1.05E+01 |  |  |
| 8018731 | NM_024599    | RHBDP2      | rhomboid 5 homolog 2 (Drosophila)     | 0.007  | 1.005 | 9.64E-01 | 9.64E+01 |  |  |
| 8018754 | NM_134268    | CYGB        | cytoglobin                            | 0.009  | 1.006 | 9.53E-01 | 9.53E+01 |  |  |
| 8018761 | NM_006456    | ST6GALNAC2  | ST6 (alpha-N-acetyl-neuraminyl-2,     | -0.118 | 0.921 | 4.10E-01 | 4.10E+01 |  |  |
| 8018774 | NM_018414    | ST6GALNAC1  | ST6 (alpha-N-acetyl-neuraminyl-2,     | 0.026  | 1.018 | 8.73E-01 | 8.73E+01 |  |  |
| 8018786 | NM_00100852  | MXRA7       | matrix-remodelling associated 7       | -0.197 | 0.872 | 1.23E-01 | 1.23E+01 |  |  |
| 8018791 | ---          | ---         | ---                                   | -0.294 | 0.816 | 3.70E-01 | 3.70E+01 |  |  |
| 8018793 | NM_00108146  | JMJD6       | jumonji domain containing 6           | -0.253 | 0.839 | 7.17E-03 | 7.17E-01 |  |  |
| 8018803 | NM_003016    | SFRS2       | splicing factor, arginine/serine-rich | -0.094 | 0.937 | 1.33E-01 | 1.33E+01 |  |  |
| 8018814 | ---          | ---         | ---                                   | 0.260  | 1.197 | 3.02E-01 | 3.02E+01 |  |  |
| 8018816 | ---          | ---         | ---                                   | -0.001 | 0.999 | 9.95E-01 | 9.95E+01 |  |  |
| 8018823 | NM_00112719  | TMC6        | transmembrane channel-like 6          | -0.065 | 0.956 | 4.96E-01 | 4.96E+01 |  |  |
| 8018849 | NM_003258    | TK1         | thymidine kinase 1, soluble           | 0.078  | 1.056 | 5.98E-01 | 5.98E+01 |  |  |
| 8018864 | NM_003955    | SOC3        | suppressor of cytokine signaling 3    | -0.219 | 0.859 | 1.86E-01 | 1.86E+01 |  |  |
| 8018906 | ---          | ---         | ---                                   | -0.007 | 0.995 | 9.68E-01 | 9.68E+01 |  |  |
| 8018922 | NM_004762    | CYTH1       | cytohesin 1                           | -0.026 | 0.982 | 8.77E-01 | 8.77E+01 |  |  |
| 8018935 | ---          | ---         | ---                                   | 0.029  | 1.020 | 9.13E-01 | 9.13E+01 |  |  |
| 8018937 | NM_025090    | USP36       | ubiquitin specific peptidase 36       | -0.096 | 0.935 | 2.85E-01 | 2.85E+01 |  |  |
| 8018966 | NM_003255    | TIMP2       | TIMP metalloproteinase inhibitor 2    | 0.626  | 1.544 | 5.53E-02 | 5.53E+00 |  |  |
| 8018972 | AK057217     | TIMP2       | TIMP metalloproteinase inhibitor 2    | 0.114  | 1.082 | 4.60E-01 | 4.60E+01 |  |  |
| 8018975 | NM_005567    | LGALS3BP    | lectin, galactoside-binding, soluble  | -0.051 | 0.965 | 7.34E-01 | 7.34E+01 |  |  |
| 8018982 | NM_138793    | CANT1       | calcium activated nucleotidase 1      | -0.011 | 0.992 | 9.63E-01 | 9.63E+01 |  |  |
| 8019005 | NM_00108257  | hCG_1776007 | hexaribonucleotide binding protei     | 0.008  | 1.006 | 9.65E-01 | 9.65E+01 |  |  |
| 8019010 | NM_020649    | CBX8        | chromobox homolog 8 (Pc class ho      | 0.007  | 1.005 | 9.66E-01 | 9.66E+01 |  |  |
| 8019018 | NM_003655    | CBX4        | chromobox homolog 4 (Pc class ho      | -0.065 | 0.956 | 5.73E-01 | 5.73E+01 |  |  |

|         |                 |               |                                                                    |        |       |          |          |  |  |
|---------|-----------------|---------------|--------------------------------------------------------------------|--------|-------|----------|----------|--|--|
| 8019031 | NM_019020       | TBC1D16       | TBC1 domain family, member 16                                      | 0.005  | 1.004 | 9.77E-01 | 9.77E+01 |  |  |
| 8019046 | NM_014740       | EIF4A3        | eukaryotic translation initiation factor 4A3                       | 0.033  | 1.023 | 9.13E-01 | 9.13E+01 |  |  |
| 8019061 | NM_000199       | SGSH          | N-sulfoglucosamine sulfohydrolase                                  | -0.027 | 0.982 | 8.76E-01 | 8.76E+01 |  |  |
| 8019071 | NM_020914       | RNF213        | ring finger protein 213                                            | -0.055 | 0.963 | 6.51E-01 | 6.51E+01 |  |  |
| 8019074 | NM_002522       | NPTX1         | neuronal pentraxin I                                               | -0.086 | 0.942 | 4.26E-01 | 4.26E+01 |  |  |
| 8019081 | ---             | ---           | ---                                                                | 0.014  | 1.009 | 9.64E-01 | 9.64E+01 |  |  |
| 8019083 | NR_026857       | FLJ90757      | hypothetical LOC440465                                             | -0.005 | 0.997 | 9.85E-01 | 9.85E+01 |  |  |
| 8019088 | AK096606        | LOC100131170  | hypothetical LOC100131170                                          | -0.011 | 0.992 | 9.61E-01 | 9.61E+01 |  |  |
| 8019090 | NM_00108039     | AATK          | apoptosis-associated tyrosine kinase                               | -0.034 | 0.977 | 7.43E-01 | 7.43E+01 |  |  |
| 8019108 | NM_014984       | AZI1          | 5-azacytidine induced 1                                            | 0.041  | 1.029 | 6.94E-01 | 6.94E+01 |  |  |
| 8019136 | BC064483        | C17orf56      | chromosome 17 open reading frame 56                                | -0.031 | 0.978 | 6.90E-01 | 6.90E+01 |  |  |
| 8019149 | NM_00103798     | SLC38A10      | solute carrier family 38, member 10                                | -0.027 | 0.982 | 8.21E-01 | 8.21E+01 |  |  |
| 8019170 | BC108932        | C17orf55      | chromosome 17 open reading frame 55                                | -0.033 | 0.978 | 7.94E-01 | 7.94E+01 |  |  |
| 8019177 | NM_178520       | TMEM105       | transmembrane protein 105                                          | 0.007  | 1.005 | 9.69E-01 | 9.69E+01 |  |  |
| 8019181 | ENST00000456121 | DKFZp761P0212 | hypothetical protein DKFZp761P0212                                 | -0.055 | 0.962 | 5.53E-01 | 5.53E+01 |  |  |
| 8019183 | NM_001614       | ACTG1         | actin, gamma 1                                                     | 0.020  | 1.014 | 9.21E-01 | 9.21E+01 |  |  |
| 8019194 | NM_025161       | C17orf70      | chromosome 17 open reading frame 70                                | -0.019 | 0.987 | 8.87E-01 | 8.87E+01 |  |  |
| 8019211 | NM_017921       | NPLOC4        | nuclear protein localization 4 homolog                             | -0.013 | 0.991 | 9.44E-01 | 9.44E+01 |  |  |
| 8019231 | NM_002602       | PDE6G         | phosphodiesterase 6G, cGMP-specific                                | -0.033 | 0.978 | 8.93E-01 | 8.93E+01 |  |  |
| 8019238 | BC090923        | C17orf90      | chromosome 17 open reading frame 90                                | -0.045 | 0.969 | 7.10E-01 | 7.10E+01 |  |  |
| 8019250 | NM_000918       | P4HB          | prolyl 4-hydroxylase, beta polypeptide                             | 0.038  | 1.027 | 8.88E-01 | 8.88E+01 |  |  |
| 8019263 | NM_004309       | ARHGDI1       | Rho GDP dissociation inhibitor GDI1                                | -0.021 | 0.986 | 9.35E-01 | 9.35E+01 |  |  |
| 8019273 | NM_005782       | THOC4         | THO complex 4                                                      | -0.011 | 0.992 | 9.61E-01 | 9.61E+01 |  |  |
| 8019280 | NM_002861       | PCYT2         | phosphate cytidylyltransferase 2, cytosolic                        | -0.011 | 0.993 | 9.53E-01 | 9.53E+01 |  |  |
| 8019296 | NM_016538       | SIRT7         | sirtuin (silent mating type information 2) 7                       | -0.067 | 0.955 | 4.50E-01 | 4.50E+01 |  |  |
| 8019308 | NM_032711       | MAFG          | v-maf musculoaponeurotic fibrosarcoma oncogene                     | -0.160 | 0.895 | 1.75E-02 | 1.75E+00 |  |  |
| 8019316 | NM_006907       | PYCR1         | pyrroline-5-carboxylate reductase                                  | -0.058 | 0.961 | 1.98E-01 | 1.98E+01 |  |  |
| 8019331 | NM_00114511     | MYADM1        | myeloid-associated differentiation factor 1                        | -0.016 | 0.989 | 8.85E-01 | 8.85E+01 |  |  |
| 8019334 | NM_178493       | NOTUM         | notum pectinacetylesterase homolog                                 | -0.056 | 0.962 | 5.25E-01 | 5.25E+01 |  |  |
| 8019347 | ---             | ---           | ---                                                                | -0.031 | 0.979 | 8.73E-01 | 8.73E+01 |  |  |
| 8019350 | NM_144998       | STRA13        | stimulated by retinoic acid 13 homolog                             | 0.003  | 1.002 | 9.88E-01 | 9.88E+01 |  |  |
| 8019357 | NM_016286       | DCXR          | dicarboxyl/L-xylulose reductase                                    | 0.065  | 1.046 | 5.06E-01 | 5.06E+01 |  |  |
| 8019367 | NM_002917       | RFNG          | RFNG O-fucosylpeptide 3-beta-N-acetylglucosaminidase               | 0.017  | 1.012 | 9.15E-01 | 9.15E+01 |  |  |
| 8019376 | NM_022156       | DUS1L         | dihydrouridine synthase 1-like (S. cerevisiae)                     | -0.061 | 0.959 | 6.53E-01 | 6.53E+01 |  |  |
| 8019392 | NM_004104       | FASN          | fatty acid synthase                                                | -0.076 | 0.949 | 3.71E-01 | 3.71E+01 |  |  |
| 8019437 | NM_198082       | CCDC57        | coiled-coil domain containing 57                                   | -0.040 | 0.972 | 6.00E-01 | 6.00E+01 |  |  |
| 8019463 | NM_139062       | CSNK1D        | casein kinase 1, delta                                             | -0.071 | 0.952 | 5.72E-01 | 5.72E+01 |  |  |
| 8019478 | NM_006137       | CD7           | CD7 molecule                                                       | -0.048 | 0.968 | 6.20E-01 | 6.20E+01 |  |  |
| 8019486 | NM_003004       | SECTM1        | secreted and transmembrane 1                                       | 0.307  | 1.237 | 5.36E-02 | 5.36E+00 |  |  |
| 8019494 | BC008897        | C17orf101     | chromosome 17 open reading frame 101                               | -0.059 | 0.960 | 6.60E-01 | 6.60E+01 |  |  |
| 8019507 | NM_00110040     | C17orf62      | chromosome 17 open reading frame 62                                | 0.002  | 1.001 | 9.90E-01 | 9.90E+01 |  |  |
| 8019517 | ---             | ---           | ---                                                                | 0.140  | 1.102 | 4.75E-01 | 4.75E+01 |  |  |
| 8019521 | NM_004514       | FOXP2         | forkhead box K2                                                    | 0.010  | 1.007 | 9.83E-01 | 9.83E+01 |  |  |
| 8019523 | NM_019613       | WDR45L        | WDR45-like                                                         | 0.079  | 1.056 | 6.17E-01 | 6.17E+01 |  |  |
| 8019532 | NM_006822       | RAB40B        | RAB40B, member RAS oncogene family                                 | -0.047 | 0.968 | 6.77E-01 | 6.77E+01 |  |  |
| 8019559 | AK126018        | B3GNTL1       | UDP-GlcNAc:betaGal beta-1,3-N-acetylglucosaminyltransferase-like 1 | -0.097 | 0.935 | 4.43E-01 | 4.43E+01 |  |  |
| 8019563 | NR_003682       | MGC70870      | C-terminal binding protein 2 pseudogene                            | 0.041  | 1.029 | 9.07E-01 | 9.07E+01 |  |  |
| 8019565 | NM_031854       | KRTAP4-12     | keratin associated protein 4-12                                    | 0.002  | 1.001 | 9.88E-01 | 9.88E+01 |  |  |
| 8019570 | NM_033059       | KRTAP4-11     | keratin associated protein 4-11                                    | 0.010  | 1.007 | 9.36E-01 | 9.36E+01 |  |  |
| 8019574 | NM_033184       | KRTAP2-4      | keratin associated protein 2-4                                     | -0.028 | 0.981 | 6.76E-01 | 6.76E+01 |  |  |
| 8019576 | NM_033184       | KRTAP2-4      | keratin associated protein 2-4                                     | -0.036 | 0.975 | 5.54E-01 | 5.54E+01 |  |  |
| 8019578 | NM_030967       | KRTAP1-1      | keratin associated protein 1-1                                     | 0.005  | 1.004 | 9.63E-01 | 9.63E+01 |  |  |
| 8019585 | NM_030966       | KRTAP1-3      | keratin associated protein 1-3                                     | -0.003 | 0.998 | 9.82E-01 | 9.82E+01 |  |  |
| 8019588 | NM_031957       | KRTAP1-5      | keratin associated protein 1-5                                     | -0.030 | 0.979 | 7.70E-01 | 7.70E+01 |  |  |
| 8019593 | NM_031958       | KRTAP3-1      | keratin associated protein 3-1                                     | -0.007 | 0.995 | 9.56E-01 | 9.56E+01 |  |  |
| 8019631 |                 | 0             | 0                                                                  | 0.002  | 1.001 | 9.98E-01 | 9.98E+01 |  |  |
| 8019633 |                 | 0             | 0                                                                  | 0.002  | 1.001 | 9.98E-01 | 9.98E+01 |  |  |
| 8019635 |                 | 0             | 0                                                                  | 0.002  | 1.001 | 9.98E-01 | 9.98E+01 |  |  |
| 8019637 |                 | 0             | 0                                                                  | 0.002  | 1.001 | 9.98E-01 | 9.98E+01 |  |  |
| 8019639 |                 | 0             | 0                                                                  | 0.002  | 1.001 | 9.98E-01 | 9.98E+01 |  |  |
| 8019641 |                 | 0             | 0                                                                  | 0.002  | 1.001 | 9.98E-01 | 9.98E+01 |  |  |
| 8019643 |                 | 0             | 0                                                                  | 0.175  | 1.129 | 2.60E-01 | 2.60E+01 |  |  |
| 8019649 | ---             | ---           | ---                                                                | 0.026  | 1.019 | 9.67E-01 | 9.67E+01 |  |  |
| 8019651 | NM_00100143     | CCL4L1        | chemokine (C-C motif) ligand 4-like                                | -0.464 | 0.725 | 1.49E-01 | 1.49E+01 |  |  |
| 8019655 | NM_00100141     | TBC1D3B       | TBC1 domain family, member 3B                                      | -0.012 | 0.992 | 9.63E-01 | 9.63E+01 |  |  |
| 8019669 | NM_000160       | GCGR          | glucagon receptor                                                  | -0.004 | 0.997 | 9.78E-01 | 9.78E+01 |  |  |
| 8019687 | NM_00100224     | ANAPC11       | anaphase promoting complex subunit 11                              | 0.005  | 1.004 | 9.85E-01 | 9.85E+01 |  |  |
| 8019693 | NM_148896       | NPB           | neuropeptide B                                                     | -0.080 | 0.946 | 3.28E-01 | 3.28E+01 |  |  |
| 8019699 | NM_033059       | KRTAP4-11     | keratin associated protein 4-11                                    | -0.038 | 0.974 | 5.50E-01 | 5.50E+01 |  |  |
| 8019703 |                 | 0             | 0                                                                  | 0.002  | 1.001 | 9.98E-01 | 9.98E+01 |  |  |
| 8019705 |                 | 0             | 0                                                                  | 0.002  | 1.001 | 9.98E-01 | 9.98E+01 |  |  |
| 8019707 |                 | 0             | 0                                                                  | 0.002  | 1.001 | 9.98E-01 | 9.98E+01 |  |  |
| 8019709 |                 | 0             | 0                                                                  | -0.006 | 0.996 | 9.90E-01 | 9.90E+01 |  |  |
| 8019711 | NM_145651       | SCGB1C1       | secretoglobins, family 1C, member 1                                | -0.003 | 0.998 | 9.86E-01 | 9.86E+01 |  |  |
| 8019716 | NM_00104028     | TBC1D3G       | TBC1 domain family, member 3G                                      | 0.004  | 1.002 | 9.89E-01 | 9.89E+01 |  |  |
| 8019737 | NM_002266       | KPNA2         | karyopherin alpha 2 (RAG cohort 2)                                 | 0.025  | 1.018 | 9.49E-01 | 9.49E+01 |  |  |
| 8019754 | NM_207368       | LOC348262     | hypothetical protein LOC348262                                     | 0.006  | 1.004 | 9.74E-01 | 9.74E+01 |  |  |

|         |                            |                                 |                                                                      |        |       |          |          |  |  |
|---------|----------------------------|---------------------------------|----------------------------------------------------------------------|--------|-------|----------|----------|--|--|
| 8019762 | ---                        | ---                             | ---                                                                  | 0.050  | 1.036 | 8.96E-01 | 8.96E+01 |  |  |
| 8019765 | NM_004309                  | ARHGDI4                         | Rho GDP dissociation inhibitor (GDI4)                                | -0.033 | 0.977 | 9.29E-01 | 9.29E+01 |  |  |
| 8019772 | NM_005782                  | THOC4                           | THO complex 4                                                        | 0.016  | 1.011 | 9.53E-01 | 9.53E+01 |  |  |
| 8019778 | NM_002861                  | PCYT2                           | phosphate cytidylyltransferase 2, cytosolic                          | -0.034 | 0.977 | 8.14E-01 | 8.14E+01 |  |  |
| 8019798 | NM_032711                  | MAFG                            | v-maf musculoaponeurotic fibrosarcoma oncogene                       | -0.042 | 0.971 | 7.77E-01 | 7.77E+01 |  |  |
| 8019802 | ---                        | 0                               | 0                                                                    | -0.047 | 0.968 | 9.16E-01 | 9.16E+01 |  |  |
| 8019807 | NM_005151                  | USP14                           | ubiquitin specific peptidase 14 (transmembrane)                      | 0.020  | 1.014 | 9.22E-01 | 9.22E+01 |  |  |
| 8019842 | NM_001071                  | TYMS                            | thymidylate synthetase                                               | 0.264  | 1.201 | 4.04E-01 | 4.04E+01 |  |  |
| 8019877 | NM_015295                  | SMCHD1                          | structural maintenance of chromosomes 1                              | -0.036 | 0.975 | 7.34E-01 | 7.34E+01 |  |  |
| 8019885 | NM_015295                  | SMCHD1                          | structural maintenance of chromosomes 1                              | -0.005 | 0.997 | 9.78E-01 | 9.78E+01 |  |  |
| 8019908 | ---                        | ---                             | ---                                                                  | 0.121  | 1.087 | 6.38E-01 | 6.38E+01 |  |  |
| 8019910 | ---                        | ---                             | ---                                                                  | 0.066  | 1.047 | 8.55E-01 | 8.55E+01 |  |  |
| 8019912 | NM_032048                  | EMILIN2                         | elastin microfibril interlacer 2                                     | 0.100  | 1.072 | 6.51E-01 | 6.51E+01 |  |  |
| 8019924 | NM_006471                  | MYL12A                          | myosin, light chain 12A, regulatory                                  | 0.017  | 1.012 | 9.33E-01 | 9.33E+01 |  |  |
| 8019930 | NM_033546                  | MYL12B                          | myosin, light chain 12B, regulatory                                  | -0.029 | 0.980 | 8.72E-01 | 8.72E+01 |  |  |
| 8019937 | ---                        | ---                             | ---                                                                  | 0.024  | 1.017 | 8.68E-01 | 8.68E+01 |  |  |
| 8019939 | NM_170695                  | TGIF1                           | TGFB-induced factor homeobox 1                                       | -0.182 | 0.881 | 3.03E-02 | 3.03E+00 |  |  |
| 8019954 | NR_024101                  | FLJ35776                        | hypothetical LOC649446                                               | -0.071 | 0.952 | 7.51E-01 | 7.51E+01 |  |  |
| 8019962 | ---                        | ---                             | ---                                                                  | 0.081  | 1.057 | 4.49E-01 | 4.49E+01 |  |  |
| 8019988 | NM_00110524                | PTPRM                           | protein tyrosine phosphatase, receptor type                          | 0.040  | 1.028 | 9.47E-01 | 9.47E+01 |  |  |
| 8020025 | ---                        | ---                             | ---                                                                  | -0.029 | 0.980 | 8.87E-01 | 8.87E+01 |  |  |
| 8020029 | NM_00102530                | RAB12                           | RAB12, member RAS oncogene family                                    | 0.038  | 1.027 | 8.05E-01 | 8.05E+01 |  |  |
| 8020058 | NM_021074                  | NDUFV2                          | NADH dehydrogenase (ubiquinone) complex 1                            | -0.131 | 0.913 | 2.08E-01 | 2.08E+01 |  |  |
| 8020068 | NM_015208                  | ANKRD12                         | ankyrin repeat domain 12                                             | -0.080 | 0.946 | 2.51E-01 | 2.51E+01 |  |  |
| 8020086 | ---                        | ---                             | ---                                                                  | -0.098 | 0.934 | 7.95E-01 | 7.95E+01 |  |  |
| 8020088 | ---                        | ---                             | ---                                                                  | -0.119 | 0.921 | 8.13E-01 | 8.13E+01 |  |  |
| 8020100 | NM_006788                  | RALBP1                          | ralA binding protein 1                                               | -0.120 | 0.920 | 4.39E-02 | 4.39E+00 |  |  |
| 8020110 | NM_006868                  | RAB31                           | RAB31, member RAS oncogene family                                    | -0.058 | 0.961 | 9.22E-01 | 9.22E+01 |  |  |
| 8020123 | NM_00109852                | TXNDC2                          | thioredoxin domain containing 2 (transmembrane)                      | -0.047 | 0.968 | 7.63E-01 | 7.63E+01 |  |  |
| 8020129 | NM_003574                  | VAPA                            | VAMP (vesicle-associated membrane protein)                           | 0.099  | 1.071 | 3.17E-01 | 3.17E+01 |  |  |
| 8020139 | ---                        | ---                             | ---                                                                  | 0.100  | 1.072 | 5.98E-01 | 5.98E+01 |  |  |
| 8020149 | NM_003826                  | NAPG                            | N-ethylmaleimide-sensitive factor guanine nucleotide exchange factor | -0.076 | 0.948 | 6.38E-01 | 6.38E+01 |  |  |
| 8020162 | NM_054028                  | AMAC1L2                         | acyl-malonyl condensing enzyme 1                                     | 0.003  | 1.002 | 9.85E-01 | 9.85E+01 |  |  |
| 8020179 | NM_020412                  | CHMP1B                          | chromatin modifying protein 1B                                       | -0.039 | 0.973 | 7.27E-01 | 7.27E+01 |  |  |
| 8020183 | NM_014214                  | IMPA2                           | inositol(myo)-1(or 4)-monophosphatase                                | 0.023  | 1.016 | 9.05E-01 | 9.05E+01 |  |  |
| 8020220 | NM_032525                  | TUBB6                           | tubulin, beta 6                                                      | -0.029 | 0.980 | 8.73E-01 | 8.73E+01 |  |  |
| 8020226 | NM_00114240                | SLMO1                           | slowmo homolog 1 (Drosophila)                                        | 0.048  | 1.034 | 6.76E-01 | 6.76E+01 |  |  |
| 8020241 | NM_020232                  | PSMG2                           | proteasome (prosome, macropain) activator                            | 0.128  | 1.093 | 1.82E-01 | 1.82E+01 |  |  |
| 8020254 | NM_031216                  | SEH1L                           | SEH1-like (S. cerevisiae)                                            | 0.170  | 1.125 | 7.17E-02 | 7.17E+00 |  |  |
| 8020267 | NM_032142                  | CEP192                          | centrosomal protein 192kDa                                           | 0.015  | 1.010 | 9.64E-01 | 9.64E+01 |  |  |
| 8020308 | NM_181481                  | C18orf1                         | chromosome 18 open reading frame 1                                   | -0.168 | 0.890 | 3.33E-03 | 3.33E-01 |  |  |
| 8020321 | ---                        | ---                             | ---                                                                  | -0.181 | 0.882 | 2.53E-01 | 2.53E+01 |  |  |
| 8020323 | NM_003799                  | RNMT                            | RNA (guanine-7-) methyltransferase                                   | 0.014  | 1.009 | 9.58E-01 | 9.58E+01 |  |  |
| 8020349 | NR_003366                  | ANKRD20B                        | ankyrin repeat domain 20B                                            | 0.169  | 1.124 | 7.12E-01 | 7.12E+01 |  |  |
| 8020382 | NM_005406                  | ROCK1                           | Rho-associated, coiled-coil containing protein kinase                | 0.070  | 1.050 | 7.17E-01 | 7.17E+01 |  |  |
| 8020411 | NM_006938                  | SNRPD1                          | small nuclear ribonucleoprotein D1                                   | 0.098  | 1.070 | 5.86E-01 | 5.86E+01 |  |  |
| 8020419 | ---                        | ---                             | ---                                                                  | 0.084  | 1.060 | 6.82E-01 | 6.82E+01 |  |  |
| 8020423 | NM_020774                  | MIB1                            | mindbomb homolog 1 (Drosophila)                                      | -0.001 | 1.000 | 9.98E-01 | 9.98E+01 |  |  |
| 8020449 | ---                        | ---                             | ---                                                                  | 0.056  | 1.040 | 7.12E-01 | 7.12E+01 |  |  |
| 8020455 | NM_005257                  | GATA6                           | GATA binding protein 6                                               | -0.066 | 0.955 | 4.97E-01 | 4.97E+01 |  |  |
| 8020491 | ---                        | ---                             | ---                                                                  | 0.007  | 1.005 | 9.83E-01 | 9.83E+01 |  |  |
| 8020495 | NM_138375                  | CABLES1                         | Cdk5 and Abl enzyme substrate 1                                      | 0.070  | 1.050 | 6.48E-01 | 6.48E+01 |  |  |
| 8020508 | NM_003831                  | RIOK3                           | RIO kinase 3 (yeast)                                                 | 0.148  | 1.108 | 1.57E-01 | 1.57E+01 |  |  |
| 8020527 | NM_013326                  | C18orf8                         | chromosome 18 open reading frame 8                                   | 0.150  | 1.110 | 7.09E-02 | 7.09E+00 |  |  |
| 8020549 | ---                        | ---                             | ---                                                                  | -0.045 | 0.969 | 7.35E-01 | 7.35E+01 |  |  |
| 8020630 | NM_153211                  | TTC39C                          | tetratricopeptide repeat domain 3C                                   | -0.095 | 0.936 | 4.21E-01 | 4.21E+01 |  |  |
| 8020647 | NR_024232                  | TTC39C                          | tetratricopeptide repeat domain 3C                                   | -0.051 | 0.965 | 6.80E-01 | 6.80E+01 |  |  |
| 8020650 | ---                        | ---                             | ---                                                                  | -0.085 | 0.943 | 7.14E-01 | 7.14E+01 |  |  |
| 8020653 | NM_012189                  | CABYR                           | calcium binding tyrosine-(Y)-phosphatase                             | 0.013  | 1.009 | 9.40E-01 | 9.40E+01 |  |  |
| 8020760 | ---                        | ---                             | ---                                                                  | -0.009 | 0.994 | 9.57E-01 | 9.57E+01 |  |  |
| 8020795 | NM_000371                  | TTR                             | transthyretin                                                        | 0.009  | 1.006 | 9.65E-01 | 9.65E+01 |  |  |
| 8020804 | ---                        | ---                             | ---                                                                  | 0.362  | 1.285 | 3.21E-01 | 3.21E+01 |  |  |
| 8020806 | NM_017831                  | RNF125                          | ring finger protein 125                                              | 0.163  | 1.120 | 5.14E-01 | 5.14E+01 |  |  |
| 8020814 | NM_016271                  | RNF138                          | ring finger protein 138                                              | 0.089  | 1.064 | 4.46E-01 | 4.46E+01 |  |  |
| 8020825 | ---                        | ---                             | ---                                                                  | 0.075  | 1.053 | 7.54E-01 | 7.54E+01 |  |  |
| 8020842 | NR_003558 // P11P1 // WBP1 | WW domain binding protein 11 pS | WW domain binding protein 11 pS                                      | -0.050 | 0.966 | 6.28E-01 | 6.28E+01 |  |  |
| 8020878 | NM_014268                  | MAPRE2                          | microtubule-associated protein, Rho GTPase-binding                   | -0.034 | 0.977 | 8.09E-01 | 8.09E+01 |  |  |
| 8020889 | NM_00113517                | ZNF397                          | zinc finger protein 397                                              | 0.142  | 1.103 | 1.11E-01 | 1.11E+01 |  |  |
| 8020903 | NM_020474                  | GALNT1                          | UDP-N-acetyl-alpha-D-galactosamine 4-epimerase                       | 0.089  | 1.064 | 7.27E-01 | 7.27E+01 |  |  |
| 8020919 | NM_031446                  | C18orf21                        | chromosome 18 open reading frame 21                                  | 0.047  | 1.033 | 8.04E-01 | 8.04E+01 |  |  |
| 8020930 | NM_018255                  | ELP2                            | elongation protein 2 homolog (S. cerevisiae)                         | 0.049  | 1.034 | 7.75E-01 | 7.75E+01 |  |  |
| 8021001 | NM_020776                  | KIAA1328                        | KIAA1328                                                             | -0.034 | 0.977 | 8.43E-01 | 8.43E+01 |  |  |
| 8021015 | NM_002647                  | PIK3C3                          | phosphoinositide-3-kinase, class 3                                   | -0.008 | 0.994 | 9.63E-01 | 9.63E+01 |  |  |
| 8021047 | NM_015559                  | SETBP1                          | SET binding protein 1                                                | 0.185  | 1.137 | 3.60E-02 | 3.60E+00 |  |  |
| 8021091 | NM_213602                  | SIGLEC15                        | sialic acid binding Ig-like lectin 15                                | -0.053 | 0.964 | 6.70E-01 | 6.70E+01 |  |  |
| 8021113 | NM_145055                  | C18orf25                        | chromosome 18 open reading frame 25                                  | 0.047  | 1.033 | 7.30E-01 | 7.30E+01 |  |  |
| 8021129 | BC093850                   | C18orf23                        | chromosome 18 open reading frame 23                                  | 0.070  | 1.050 | 6.96E-01 | 6.96E+01 |  |  |

|         |              |           |                                      |        |       |          |          |  |  |
|---------|--------------|-----------|--------------------------------------|--------|-------|----------|----------|--|--|
| 8021147 | NM_016097    | IER3IP1   | immediate early response 3 intera    | -0.039 | 0.974 | 8.88E-01 | 8.88E+01 |  |  |
| 8021154 | NM_00114239  | KIAA0427  | KIAA0427                             | -0.011 | 0.993 | 9.51E-01 | 9.51E+01 |  |  |
| 8021169 | NM_006033    | LIPG      | lipase, endothelial                  | -0.055 | 0.963 | 5.49E-01 | 5.49E+01 |  |  |
| 8021181 | NR_003003    | SCARNA17  | small Cajal body-specific RNA 17     | -0.182 | 0.882 | 4.32E-01 | 4.32E+01 |  |  |
| 8021183 | NR_003003    | SCARNA17  | small Cajal body-specific RNA 17     | -0.059 | 0.960 | 8.56E-01 | 8.56E+01 |  |  |
| 8021208 | NM_002396    | ME2       | malic enzyme 2, NAD(+)-depende       | 0.180  | 1.133 | 2.73E-02 | 2.73E+00 |  |  |
| 8021222 | NM_018696    | ELAC1     | elaC homolog 1 (E. coli)             | -0.063 | 0.957 | 6.89E-01 | 6.89E+01 |  |  |
| 8021228 | NM_005359    | SMAD4     | SMAD family member 4                 | -0.038 | 0.974 | 7.97E-01 | 7.97E+01 |  |  |
| 8021275 | NM_007195    | POLI      | polymerase (DNA directed) iota       | 0.004  | 1.003 | 9.88E-01 | 9.88E+01 |  |  |
| 8021312 | NM_015285    | WDR7      | WD repeat domain 7                   | 0.160  | 1.117 | 1.08E-01 | 1.08E+01 |  |  |
| 8021344 | AK301799     | BOD1P     | biorientation of chromosomes in c    | 0.032  | 1.022 | 7.61E-01 | 7.61E+01 |  |  |
| 8021357 | NM_004852    | ONECUT2   | one cut homeobox 2                   | -0.038 | 0.974 | 7.35E-01 | 7.35E+01 |  |  |
| 8021363 | ---          | ---       | ---                                  | 0.028  | 1.020 | 9.03E-01 | 9.03E+01 |  |  |
| 8021365 | NM_005603    | ATP8B1    | ATPase, class I, type 8B, member 1   | 0.144  | 1.105 | 5.15E-01 | 5.15E+01 |  |  |
| 8021368 | ---          | ---       | ---                                  | 0.501  | 1.415 | 5.46E-02 | 5.46E+00 |  |  |
| 8021372 | ---          | ---       | ---                                  | 0.112  | 1.081 | 6.20E-01 | 6.20E+01 |  |  |
| 8021418 | NM_006785    | MALT1     | mucosa associated lymphoid tissu     | -0.057 | 0.961 | 6.11E-01 | 6.11E+01 |  |  |
| 8021442 | NM_018181    | ZNF532    | zinc finger protein 532              | -0.019 | 0.987 | 9.40E-01 | 9.40E+01 |  |  |
| 8021453 | NM_033280    | SEC11C    | SEC11 homolog C (S. cerevisiae)      | 0.131  | 1.095 | 2.00E-01 | 2.00E+01 |  |  |
| 8021461 | NM_002091    | GRP       | gastrin-releasing peptide            | -0.055 | 0.962 | 6.34E-01 | 6.34E+01 |  |  |
| 8021468 | ---          | ---       | ---                                  | 0.044  | 1.031 | 6.69E-01 | 6.69E+01 |  |  |
| 8021470 | NM_021127    | PMAIP1    | phorbol-12-myristate-13-acetate-i    | -0.321 | 0.800 | 2.96E-02 | 2.96E+00 |  |  |
| 8021478 | ---          | ---       | ---                                  | -0.026 | 0.982 | 9.42E-01 | 9.42E+01 |  |  |
| 8021496 | NM_020854    | KIAA1468  | KIAA1468                             | 0.078  | 1.055 | 5.02E-01 | 5.02E+01 |  |  |
| 8021528 | NM_003839    | TNFRSF11A | tumor necrosis factor receptor sup   | -0.042 | 0.971 | 6.93E-01 | 6.93E+01 |  |  |
| 8021542 | NM_017742    | ZCCHC2    | zinc finger, CCHC domain containi    | -0.041 | 0.972 | 7.51E-01 | 7.51E+01 |  |  |
| 8021546 | NM_017742    | ZCCHC2    | zinc finger, CCHC domain containi    | 0.061  | 1.044 | 7.93E-01 | 7.93E+01 |  |  |
| 8021563 | ---          | ---       | ---                                  | -0.017 | 0.988 | 9.53E-01 | 9.53E+01 |  |  |
| 8021565 | NM_194449    | PHLPP1    | PH domain and leucine rich repeat    | -0.097 | 0.935 | 1.97E-01 | 1.97E+01 |  |  |
| 8021653 | NM_002640    | SERPINB8  | serpin peptidase inhibitor, clade B  | -0.179 | 0.883 | 3.53E-01 | 3.53E+01 |  |  |
| 8021707 | NM_004232    | SOC56     | suppressor of cytokine signaling 6   | 0.279  | 1.213 | 7.51E-02 | 7.51E+00 |  |  |
| 8021712 | ---          | ---       | ---                                  | -0.063 | 0.957 | 6.57E-01 | 6.57E+01 |  |  |
| 8021714 | ---          | ---       | ---                                  | 0.040  | 1.028 | 7.33E-01 | 7.33E+01 |  |  |
| 8021716 | NM_014177    | C18orf55  | chromosome 18 open reading fram      | 0.070  | 1.049 | 8.01E-01 | 8.01E+01 |  |  |
| 8021725 | ---          | ---       | ---                                  | -0.025 | 0.982 | 8.75E-01 | 8.75E+01 |  |  |
| 8021756 | NM_017757    | ZNF407    | zinc finger protein 407              | -0.022 | 0.985 | 9.16E-01 | 9.16E+01 |  |  |
| 8021768 | NM_005786    | TSHZ1     | teashirt zinc finger homeobox 1      | 0.060  | 1.043 | 6.98E-01 | 6.98E+01 |  |  |
| 8021774 | ENST00000405 | FLJ44313  | FLJ44313 protein                     | -0.047 | 0.968 | 6.57E-01 | 6.57E+01 |  |  |
| 8021783 | NM_007345    | ZNF236    | zinc finger protein 236              | -0.055 | 0.963 | 5.79E-01 | 5.79E+01 |  |  |
| 8021824 | ---          | ---       | ---                                  | 0.159  | 1.116 | 3.25E-01 | 3.25E+01 |  |  |
| 8021826 | NM_171999    | SALL3     | sal-like 3 (Drosophila)              | 0.000  | 1.000 | 9.98E-01 | 9.98E+01 |  |  |
| 8021832 | NM_198531    | ATP9B     | ATPase, class II, type 9B            | 0.043  | 1.030 | 7.95E-01 | 7.95E+01 |  |  |
| 8021866 | NM_172387    | NFATC1    | nuclear factor of activated T-cells, | 0.062  | 1.044 | 4.42E-01 | 4.42E+01 |  |  |
| 8021884 | NM_004715    | CTDP1     | CTD (carboxy-terminal domain, RN     | -0.043 | 0.970 | 5.06E-01 | 5.06E+01 |  |  |
| 8021900 | NM_012283    | KCNQ2     | potassium voltage-gated channel,     | -0.093 | 0.938 | 4.05E-01 | 4.05E+01 |  |  |
| 8021905 | BC014195     | C18orf22  | chromosome 18 open reading fram      | -0.034 | 0.977 | 8.30E-01 | 8.30E+01 |  |  |
| 8021914 | NM_014913    | ADNP2     | ADNP homeobox 2                      | 0.020  | 1.014 | 9.41E-01 | 9.41E+01 |  |  |
| 8021919 | NM_020040    | TUBB4Q    | tubulin, beta polypeptide 4, mem     | -0.050 | 0.966 | 5.53E-01 | 5.53E+01 |  |  |
| 8021924 | NM_005131    | THOC1     | THO complex 1                        | 0.079  | 1.056 | 6.00E-01 | 6.00E+01 |  |  |
| 8021963 | NM_001071    | TYMS      | thymidylate synthetase               | -0.033 | 0.977 | 8.06E-01 | 8.06E+01 |  |  |
| 8021966 | NM_017512    | ENOSF1    | enolase superfamily member 1         | -0.133 | 0.912 | 4.53E-01 | 4.53E+01 |  |  |
| 8021984 | NM_005433    | YES1      | v-yes-1 Yamaguchi sarcoma viral o    | 0.010  | 1.007 | 9.81E-01 | 9.81E+01 |  |  |
| 8022007 | ---          | ---       | ---                                  | 0.015  | 1.011 | 9.69E-01 | 9.69E+01 |  |  |
| 8022009 | NM_022840    | METTL4    | methyltransferase like 4             | 0.052  | 1.037 | 7.86E-01 | 7.86E+01 |  |  |
| 8022022 | NM_014646    | LPIN2     | lipin 2                              | -0.032 | 0.978 | 8.06E-01 | 8.06E+01 |  |  |
| 8022043 | ---          | ---       | ---                                  | -0.028 | 0.981 | 8.66E-01 | 8.66E+01 |  |  |
| 8022085 | NM_004746    | DLGAP1    | discs, large (Drosophila) homolog    | -0.046 | 0.968 | 5.61E-01 | 5.61E+01 |  |  |
| 8022110 | NM_00114382  | ZFP161    | zinc finger protein 161 homolog (r   | -0.043 | 0.970 | 7.91E-01 | 7.91E+01 |  |  |
| 8022118 | NM_012307    | EPB41L3   | erythrocyte membrane protein ba      | -0.150 | 0.901 | 7.60E-01 | 7.60E+01 |  |  |
| 8022145 | NM_173464    | L3MBTL4   | l(3)mbt-like 4 (Drosophila)          | 0.168  | 1.124 | 1.58E-01 | 1.58E+01 |  |  |
| 8022170 | NM_00102466  | RPL6      | ribosomal protein L6                 | -0.019 | 0.987 | 8.60E-01 | 8.60E+01 |  |  |
| 8022243 | ---          | ---       | ---                                  | -0.060 | 0.959 | 5.34E-01 | 5.34E+01 |  |  |
| 8022251 | NM_00104238  | PPP4R1    | protein phosphatase 4, regulatory    | -0.159 | 0.896 | 1.29E-01 | 1.29E+01 |  |  |
| 8022277 | ---          | ---       | ---                                  | -0.075 | 0.949 | 7.98E-01 | 7.98E+01 |  |  |
| 8022279 | ---          | ---       | ---                                  | 0.048  | 1.034 | 9.49E-01 | 9.49E+01 |  |  |
| 8022320 | ENST00000446 | NPIPL3    | nuclear pore complex interacting     | 0.011  | 1.008 | 9.39E-01 | 9.39E+01 |  |  |
| 8022326 | NM_023075    | MPPE1     | metallophosphoesterase 1             | -0.022 | 0.985 | 9.33E-01 | 9.33E+01 |  |  |
| 8022342 | NM_006796    | AFG3L2    | AFG3 ATPase family gene 3-like 2     | 0.097  | 1.070 | 3.27E-01 | 3.27E+01 |  |  |
| 8022356 | NM_00112862  | SPIRE1    | spire homolog 1 (Drosophila)         | 0.110  | 1.079 | 6.47E-01 | 6.47E+01 |  |  |
| 8022380 | NM_024899    | CEP76     | centrosomal protein 76kDa            | -0.050 | 0.966 | 7.72E-01 | 7.72E+01 |  |  |
| 8022393 | NM_002828    | PTPN2     | protein tyrosine phosphatase, non    | 0.127  | 1.092 | 3.63E-01 | 3.63E+01 |  |  |
| 8022410 | ---          | ---       | ---                                  | -0.093 | 0.937 | 6.54E-01 | 6.54E+01 |  |  |
| 8022418 | ---          | ---       | ---                                  | 0.017  | 1.012 | 9.33E-01 | 9.33E+01 |  |  |
| 8022426 | ENST00000342 | LOC646359 | similar to telomeric repeat binding  | -0.142 | 0.906 | 5.38E-01 | 5.38E+01 |  |  |
| 8022434 | ---          | ---       | ---                                  | 0.028  | 1.020 | 8.29E-01 | 8.29E+01 |  |  |
| 8022441 | NM_005406    | ROCK1     | Rho-associated, coiled-coil contain  | 0.023  | 1.016 | 8.63E-01 | 8.63E+01 |  |  |
| 8022473 | NM_052911    | ESCO1     | establishment of cohesion 1 homod    | 0.037  | 1.026 | 8.27E-01 | 8.27E+01 |  |  |

|         |                 |              |                                                                        |        |       |          |          |  |  |
|---------|-----------------|--------------|------------------------------------------------------------------------|--------|-------|----------|----------|--|--|
| 8022488 | NM_138340       | ABHD3        | abhydrolase domain containing 3                                        | 0.051  | 1.036 | 7.82E-01 | 7.82E+01 |  |  |
| 8022506 | ---             | ---          | ---                                                                    | 0.146  | 1.107 | 6.82E-01 | 6.82E+01 |  |  |
| 8022514 | NM_032933       | C18orf45     | chromosome 18 open reading frame                                       | 0.117  | 1.084 | 5.29E-01 | 5.29E+01 |  |  |
| 8022531 | NM_000271       | NPC1         | Niemann-Pick disease, type C1                                          | 0.270  | 1.206 | 1.65E-01 | 1.65E+01 |  |  |
| 8022557 | ---             | ---          | ---                                                                    | 0.123  | 1.089 | 6.75E-01 | 6.75E+01 |  |  |
| 8022606 | ---             | ---          | ---                                                                    | 0.169  | 1.124 | 5.65E-01 | 5.65E+01 |  |  |
| 8022608 | ---             | ---          | ---                                                                    | -0.046 | 0.968 | 7.69E-01 | 7.69E+01 |  |  |
| 8022623 | ---             | ---          | ---                                                                    | 0.036  | 1.025 | 7.29E-01 | 7.29E+01 |  |  |
| 8022625 | NM_00100755     | SS18         | synovial sarcoma translocation, chromosome 18                          | -0.075 | 0.949 | 3.80E-01 | 3.80E+01 |  |  |
| 8022653 | NR_024259       | LOC728606    | hypothetical LOC728606                                                 | -0.002 | 0.999 | 9.91E-01 | 9.91E+01 |  |  |
| 8022711 | NM_024422       | DSC2         | desmocollin 2                                                          | -0.002 | 0.999 | 9.99E-01 | 9.99E+01 |  |  |
| 8022767 | NM_014939       | KIAA1012     | KIAA1012                                                               | 0.087  | 1.062 | 4.29E-01 | 4.29E+01 |  |  |
| 8022814 | NM_002136       | HNRNPA1      | heterogeneous nuclear ribonucleoprotein A1                             | -0.026 | 0.982 | 8.58E-01 | 8.58E+01 |  |  |
| 8022870 | ---             | ---          | ---                                                                    | -0.054 | 0.963 | 9.05E-01 | 9.05E+01 |  |  |
| 8022882 | NM_006965       | ZNF24        | zinc finger protein 24                                                 | -0.005 | 0.997 | 9.78E-01 | 9.78E+01 |  |  |
| 8022902 | NM_00109881     | INO80C       | INO80 complex subunit C                                                | -0.049 | 0.967 | 7.99E-01 | 7.99E+01 |  |  |
| 8022912 | ---             | ---          | ---                                                                    | -0.009 | 0.993 | 9.58E-01 | 9.58E+01 |  |  |
| 8022914 | NM_018170       | RPD1A        | regulation of nuclear pre-mRNA splicing factor 1A                      | 0.050  | 1.035 | 7.73E-01 | 7.73E+01 |  |  |
| 8022927 | NM_012319       | SLC39A6      | solute carrier family 39 (zinc transporters) member 6                  | -0.070 | 0.953 | 6.51E-01 | 6.51E+01 |  |  |
| 8022941 | NM_015476       | C18orf10     | chromosome 18 open reading frame 10                                    | -0.027 | 0.982 | 8.89E-01 | 8.89E+01 |  |  |
| 8022952 | NM_020180       | BRUNOL4      | bruno-like 4, RNA binding protein                                      | -0.005 | 0.997 | 9.77E-01 | 9.77E+01 |  |  |
| 8022970 | ---             | ---          | ---                                                                    | 0.009  | 1.006 | 9.56E-01 | 9.56E+01 |  |  |
| 8022972 | NM_000972       | RPL7A        | ribosomal protein L7a                                                  | 0.026  | 1.018 | 9.05E-01 | 9.05E+01 |  |  |
| 8022996 | NM_020964       | KIAA1632     | KIAA1632                                                               | 0.132  | 1.096 | 3.30E-01 | 3.30E+01 |  |  |
| 8023059 | ---             | ---          | ---                                                                    | 0.265  | 1.202 | 1.61E-01 | 1.61E+01 |  |  |
| 8023061 | ---             | ---          | ---                                                                    | -0.046 | 0.969 | 8.74E-01 | 8.74E+01 |  |  |
| 8023063 | NM_00100193     | ATP5A1       | ATP synthase, H+ transporting, mitochondrial F1 complex, alpha subunit | 0.026  | 1.018 | 8.69E-01 | 8.69E+01 |  |  |
| 8023121 | NM_013305       | ST8SIA5      | ST8 alpha-N-acetyl-neuraminidase 5                                     | -0.022 | 0.985 | 8.73E-01 | 8.73E+01 |  |  |
| 8023133 | NM_004671       | PIAS2        | protein inhibitor of activated STAT1                                   | 0.076  | 1.054 | 5.96E-01 | 5.96E+01 |  |  |
| 8023156 | NM_145653       | TCEB3C       | transcription elongation factor B polypeptide 3C                       | -0.098 | 0.934 | 2.25E-01 | 2.25E+01 |  |  |
| 8023165 | NM_032124       | HDHD2        | haloacid dehalogenase-like hydrolase domain containing 2               | 0.077  | 1.055 | 6.54E-01 | 6.54E+01 |  |  |
| 8023175 | NM_016097       | IER3IP1      | immediate early response 3 interacting protein 1                       | -0.049 | 0.967 | 7.15E-01 | 7.15E+01 |  |  |
| 8023184 | AY669508        | FUSSEL18     | functional smad suppressing element 18                                 | -0.100 | 0.933 | 3.79E-01 | 3.79E+01 |  |  |
| 8023191 | NM_005901       | SMAD2        | SMAD family member 2                                                   | 0.138  | 1.101 | 3.42E-01 | 3.42E+01 |  |  |
| 8023195 | NM_005901       | SMAD2        | SMAD family member 2                                                   | 0.039  | 1.027 | 8.10E-01 | 8.10E+01 |  |  |
| 8023212 | NM_00103936     | ZBTB7C       | zinc finger and BTB domain containing 7C                               | -0.047 | 0.968 | 5.67E-01 | 5.67E+01 |  |  |
| 8023218 | ---             | ---          | ---                                                                    | -0.075 | 0.950 | 6.58E-01 | 6.58E+01 |  |  |
| 8023220 | NM_005904       | SMAD7        | SMAD family member 7                                                   | 0.026  | 1.018 | 9.09E-01 | 9.09E+01 |  |  |
| 8023228 | NM_017653       | DYM          | dymecilin                                                              | 0.062  | 1.044 | 6.52E-01 | 6.52E+01 |  |  |
| 8023246 | BC093004        | C18orf32     | chromosome 18 open reading frame 32                                    | 0.150  | 1.109 | 3.41E-01 | 3.41E+01 |  |  |
| 8023252 | NM_000985       | RPL17        | ribosomal protein L17                                                  | -0.062 | 0.958 | 7.30E-01 | 7.30E+01 |  |  |
| 8023259 | NR_002571       | SNORD58A     | small nucleolar RNA, C/D box 58A                                       | -0.103 | 0.931 | 7.45E-01 | 7.45E+01 |  |  |
| 8023261 | NM_006111       | ACAA2        | acetyl-Coenzyme A acyltransferase 2                                    | 0.119  | 1.086 | 3.87E-01 | 3.87E+01 |  |  |
| 8023308 | ---             | ---          | ---                                                                    | 0.063  | 1.044 | 5.87E-01 | 5.87E+01 |  |  |
| 8023323 | NM_015846       | MBD1         | methyl-CpG binding domain protein 1                                    | -0.073 | 0.950 | 4.04E-01 | 4.04E+01 |  |  |
| 8023344 | NM_00110165     | CXXC1        | CXXC finger 1 (PHD domain)                                             | -0.040 | 0.972 | 8.16E-01 | 8.16E+01 |  |  |
| 8023377 | NM_016626       | MEX3C        | mex-3 homolog C (C. elegans)                                           | 0.030  | 1.021 | 8.44E-01 | 8.44E+01 |  |  |
| 8023382 | NM_003927       | MBD2         | methyl-CpG binding domain protein 2                                    | 0.104  | 1.075 | 3.22E-01 | 3.22E+01 |  |  |
| 8023392 | NR_002970       | SNORA37      | small nucleolar RNA, H/ACA box 37                                      | -0.091 | 0.939 | 5.63E-01 | 5.63E+01 |  |  |
| 8023415 | NM_00108396     | TCF4         | transcription factor 4                                                 | 0.274  | 1.209 | 1.79E-01 | 1.79E+01 |  |  |
| 8023450 | NR_024546       | TXNL1        | thioredoxin-like 1                                                     | -0.026 | 0.982 | 8.38E-01 | 8.38E+01 |  |  |
| 8023466 | NM_00101251     | FECH         | ferrochelatase (protoporphyrinogen oxidase)                            | 0.031  | 1.022 | 8.81E-01 | 8.81E+01 |  |  |
| 8023481 | NM_004539       | NARS         | asparaginyl-tRNA synthetase                                            | 0.139  | 1.101 | 4.98E-02 | 4.98E+00 |  |  |
| 8023526 | ENST00000446146 | LOC100132992 | similar to hCG1979072                                                  | -0.085 | 0.943 | 6.70E-01 | 6.70E+01 |  |  |
| 8023549 | NM_013435       | RAX          | retina and anterior neural fold homeobox 1                             | -0.062 | 0.958 | 3.85E-01 | 3.85E+01 |  |  |
| 8023561 | NM_005570       | LMAN1        | lectin, mannose-binding, 1                                             | 0.002  | 1.001 | 9.90E-01 | 9.90E+01 |  |  |
| 8023646 | NM_000633       | BCL2         | B-cell CLL/lymphoma 2                                                  | 0.037  | 1.026 | 8.30E-01 | 8.30E+01 |  |  |
| 8023656 | NM_002035       | KDSR         | 3-ketodihydrosphingosine reductase                                     | -0.093 | 0.937 | 6.31E-01 | 6.31E+01 |  |  |
| 8023672 | NM_004869       | VPS4B        | vacuolar protein sorting 4 homolog B                                   | -0.015 | 0.990 | 9.22E-01 | 9.22E+01 |  |  |
| 8023708 | ---             | ---          | ---                                                                    | -0.028 | 0.981 | 9.16E-01 | 9.16E+01 |  |  |
| 8023735 | NM_019022       | TMX3         | thioredoxin-related transmembrane protein 3                            | 0.083  | 1.059 | 4.84E-01 | 4.84E+01 |  |  |
| 8023757 | NM_006566       | CD226        | CD226 molecule                                                         | -0.025 | 0.983 | 9.48E-01 | 9.48E+01 |  |  |
| 8023766 | NM_173630       | RTTN         | rotatin                                                                | -0.045 | 0.969 | 8.04E-01 | 8.04E+01 |  |  |
| 8023855 | NM_148923       | CYB5A        | cytochrome b5 type A (microsomal)                                      | -0.035 | 0.976 | 8.98E-01 | 8.98E+01 |  |  |
| 8023862 | ---             | ---          | ---                                                                    | 0.025  | 1.018 | 9.11E-01 | 9.11E+01 |  |  |
| 8023868 | NR_024484       | LOC400657    | hypothetical LOC400657                                                 | 0.130  | 1.094 | 1.80E-01 | 1.80E+01 |  |  |
| 8023871 | NM_175907       | ZADH2        | zinc binding alcohol dehydrogenase 2                                   | 0.013  | 1.009 | 9.63E-01 | 9.63E+01 |  |  |
| 8023882 | NM_014643       | ZNF516       | zinc finger protein 516                                                | -0.068 | 0.954 | 4.04E-01 | 4.04E+01 |  |  |
| 8023889 | NM_00102510     | MBP          | myelin basic protein                                                   | -0.097 | 0.935 | 2.03E-01 | 2.03E+01 |  |  |
| 8023914 | NM_025078       | PQLC1        | PQ loop repeat containing 1                                            | 0.026  | 1.018 | 8.49E-01 | 8.49E+01 |  |  |
| 8023920 | NM_006701       | TXNL4A       | thioredoxin-like 4A                                                    | 0.045  | 1.032 | 8.84E-01 | 8.84E+01 |  |  |
| 8023933 | ---             | ---          | ---                                                                    | 0.012  | 1.009 | 9.77E-01 | 9.77E+01 |  |  |
| 8023939 | ---             | ---          | ---                                                                    | -0.036 | 0.975 | 8.57E-01 | 8.57E+01 |  |  |
| 8023941 | NM_130760       | MADCAM1      | mucosal vascular addressin cell adhesion molecule 1                    | -0.019 | 0.987 | 8.78E-01 | 8.78E+01 |  |  |
| 8023948 | NM_033513       | C19orf20     | chromosome 19 open reading frame 20                                    | 0.006  | 1.004 | 9.66E-01 | 9.66E+01 |  |  |
| 8023955 | NM_001728       | BSG          | basigin (Ok blood group)                                               | -0.024 | 0.983 | 8.78E-01 | 8.78E+01 |  |  |
| 8023968 | NM_004359       | CDC34        | cell division cycle 34 homolog (S. cerevisiae)                         | -0.016 | 0.989 | 9.57E-01 | 9.57E+01 |  |  |

|         |             |          |                                      |        |       |          |          |  |
|---------|-------------|----------|--------------------------------------|--------|-------|----------|----------|--|
| 8023977 | NM_005317   | GZMM     | granzyme M (lymphocyte met-ase       | -0.027 | 0.981 | 8.66E-01 | 8.66E+01 |  |
| 8023984 | NM_001194   | HCN2     | hyperpolarization activated cyclic   | 0.008  | 1.005 | 9.65E-01 | 9.65E+01 |  |
| 8023990 | NM_020637   | FGF22    | fibroblast growth factor 22          | -0.036 | 0.975 | 7.86E-01 | 7.86E+01 |  |
| 8023995 | NM_005860   | FSTL3    | folliculin-like 3 (secreted glycopro | -0.060 | 0.959 | 6.00E-01 | 6.00E+01 |  |
| 8024001 | ---         | ---      | ---                                  | -0.046 | 0.968 | 7.87E-01 | 7.87E+01 |  |
| 8024003 | NM_002579   | PALM     | paralemmin                           | -0.020 | 0.986 | 8.52E-01 | 8.52E+01 |  |
| 8024013 | BC052236    | C19orf21 | chromosome 19 open reading fram      | -0.026 | 0.982 | 8.84E-01 | 8.84E+01 |  |
| 8024019 | NM_002819   | PTBP1    | polypyrimidine tract binding prote   | 0.003  | 1.002 | 9.86E-01 | 9.86E+01 |  |
| 8024038 | NM_001700   | AZU1     | azurocidin 1                         | -0.088 | 0.941 | 1.59E-01 | 1.59E+01 |  |
| 8024048 | NM_002777   | PRTN3    | proteinase 3                         | -0.049 | 0.967 | 6.78E-01 | 6.78E+01 |  |
| 8024056 | NM_001972   | ELANE    | elastase, neutrophil expressed       | -0.030 | 0.979 | 7.56E-01 | 7.56E+01 |  |
| 8024062 | NM_001928   | CFD      | complement factor D (adipsin)        | 0.099  | 1.071 | 1.56E-01 | 1.56E+01 |  |
| 8024070 | NM_032551   | KISS1R   | KISS1 receptor                       | -0.029 | 0.980 | 8.37E-01 | 8.37E+01 |  |
| 8024078 | NM_005224   | ARID3A   | AT rich interactive domain 3A (BR    | -0.029 | 0.980 | 7.91E-01 | 7.91E+01 |  |
| 8024089 | NM_024100   | WDR18    | WD repeat domain 18                  | 0.039  | 1.028 | 7.15E-01 | 7.15E+01 |  |
| 8024100 | NM_138690   | GRIN3B   | glutamate receptor, ionotropic, N-   | 0.009  | 1.006 | 9.49E-01 | 9.49E+01 |  |
| 8024111 | NM_004368   | CNN2     | calponin 2                           | 0.105  | 1.076 | 5.57E-01 | 5.57E+01 |  |
| 8024120 | NM_019112   | ABCA7    | ATP-binding cassette, sub-family A   | -0.073 | 0.950 | 2.91E-01 | 2.91E+01 |  |
| 8024170 | NM_012292   | HMHA1    | histocompatibility (minor) HA-1      | -0.041 | 0.972 | 7.94E-01 | 7.94E+01 |  |
| 8024194 | NM_002085   | GPX4     | glutathione peroxidase 4 (phospho    | 0.018  | 1.013 | 9.61E-01 | 9.61E+01 |  |
| 8024204 | NM_000455   | STK11    | serine/threonine kinase 11           | 0.006  | 1.004 | 9.78E-01 | 9.78E+01 |  |
| 8024219 | NM_001687   | ATPSD    | ATP synthase, H+ transporting, mi    | -0.044 | 0.970 | 7.23E-01 | 7.23E+01 |  |
| 8024228 | NM_177401   | MIDN     | midnolin                             | -0.065 | 0.956 | 3.28E-01 | 3.28E+01 |  |
| 8024238 | NM_001280   | CIRBP    | cold inducible RNA binding protein   | 0.000  | 1.000 | 9.98E-01 | 9.98E+01 |  |
| 8024246 | NM_017914   | C19orf24 | chromosome 19 open reading fram      | -0.020 | 0.986 | 8.99E-01 | 8.99E+01 |  |
| 8024250 | NM_001405   | EFNA2    | ephrin-A2                            | -0.017 | 0.988 | 9.18E-01 | 9.18E+01 |  |
| 8024255 | NR_024247   | MUM1     | melanoma associated antigen (mu      | -0.106 | 0.929 | 2.91E-01 | 2.91E+01 |  |
| 8024273 | NM_024407   | NDUFS7   | NADH dehydrogenase (ubiquinone       | 0.035  | 1.024 | 8.45E-01 | 8.45E+01 |  |
| 8024282 | NM_170711   | DAZAP1   | DAZ associated protein 1             | -0.055 | 0.963 | 4.27E-01 | 4.27E+01 |  |
| 8024299 | NM_001018   | RPS15    | ribosomal protein S15                | -0.024 | 0.984 | 9.09E-01 | 9.09E+01 |  |
| 8024304 | ---         | ---      | ---                                  | -0.043 | 0.971 | 7.97E-01 | 7.97E+01 |  |
| 8024306 | NM_005883   | APC2     | adenomatosis polyposi coli 2         | 0.004  | 1.003 | 9.80E-01 | 9.80E+01 |  |
| 8024323 | NM_138393   | REEP6    | receptor accessory protein 6         | -0.031 | 0.978 | 7.74E-01 | 7.74E+01 |  |
| 8024331 | NR_026557   | PLK5P    | polo-like kinase 5 pseudogene        | 0.000  | 1.000 | 1.00E+00 | 1.00E+02 |  |
| 8024347 | NM_079834   | SCAMP4   | secretory carrier membrane prote     | -0.013 | 0.991 | 9.25E-01 | 9.25E+01 |  |
| 8024356 | NM_138422   | ADAT3    | adenosine deaminase, tRNA-speci      | -0.041 | 0.972 | 7.34E-01 | 7.34E+01 |  |
| 8024358 | NM_001319   | CSNK1G2  | casein kinase 1, gamma 2             | -0.042 | 0.972 | 8.05E-01 | 8.05E+01 |  |
| 8024373 | NM_00103984 | C19orf36 | chromosome 19 open reading fram      | -0.041 | 0.972 | 6.51E-01 | 6.51E+01 |  |
| 8024391 | NM_032482   | DOT1L    | DOT1-like, histone H3 methyltrans    | 0.009  | 1.006 | 9.63E-01 | 9.63E+01 |  |
| 8024420 | NM_007165   | SF3A2    | splicing factor 3a, subunit 2, 66kDa | -0.023 | 0.984 | 8.73E-01 | 8.73E+01 |  |
| 8024429 | NM_000479   | AMH      | anti-Mullerian hormone               | 0.000  | 1.000 | 9.98E-01 | 9.98E+01 |  |
| 8024436 | NM_004152   | OAZ1     | ornithine decarboxylase antizyme     | 0.038  | 1.027 | 8.42E-01 | 8.42E+01 |  |
| 8024444 | AY358234    | UNQ6493  | EPWW6493                             | -0.044 | 0.970 | 7.41E-01 | 7.41E+01 |  |
| 8024446 | NM_00107723 | SPPL2B   | signal peptide peptidase-like 2B     | -0.093 | 0.938 | 3.95E-01 | 3.95E+01 |  |
| 8024467 | NM_182973   | TMPPRS59 | transmembrane protease, serine 5     | 0.012  | 1.008 | 9.42E-01 | 9.42E+01 |  |
| 8024485 | NM_015675   | GADD45B  | growth arrest and DNA-damage-in      | -0.163 | 0.893 | 3.05E-01 | 3.05E+01 |  |
| 8024497 | NM_003249   | THOP1    | thimet oligopeptidase 1              | -0.137 | 0.910 | 5.58E-02 | 5.58E+00 |  |
| 8024518 | NM_152791   | ZNF555   | zinc finger protein 555              | 0.146  | 1.107 | 2.50E-01 | 2.50E+01 |  |
| 8024532 | NM_173480   | ZNF57    | zinc finger protein 57               | 0.009  | 1.006 | 9.81E-01 | 9.81E+01 |  |
| 8024572 | NM_002068   | GNA15    | guanine nucleotide binding protei    | -0.228 | 0.854 | 3.66E-01 | 3.66E+01 |  |
| 8024582 | NM_003775   | S1PR4    | sphingosine-1-phosphate receptor     | 0.059  | 1.042 | 6.20E-01 | 6.20E+01 |  |
| 8024584 | NM_020170   | NCLN     | nicalin homolog (zebrafish)          | -0.023 | 0.984 | 8.62E-01 | 8.62E+01 |  |
| 8024605 | NM_021938   | BRUNOL5  | bruno-like 5, RNA binding protein    | -0.088 | 0.941 | 1.60E-01 | 1.60E+01 |  |
| 8024623 | NM_205843   | NFIC     | nuclear factor I/C (CCAAT-binding    | -0.043 | 0.971 | 7.32E-01 | 7.32E+01 |  |
| 8024637 | NM_00113619 | FZR1     | fizzy/cell division cycle 20 related | -0.033 | 0.977 | 7.54E-01 | 7.54E+01 |  |
| 8024655 | NM_00113558 | C19orf71 | chromosome 19 open reading fram      | 0.017  | 1.012 | 9.21E-01 | 9.21E+01 |  |
| 8024660 | NM_006339   | HMG20B   | high-mobility group 20B              | -0.007 | 0.995 | 9.66E-01 | 9.66E+01 |  |
| 8024676 | NM_133261   | GIPC3    | GIPC PDZ domain containing famil     | -0.127 | 0.915 | 1.57E-01 | 1.57E+01 |  |
| 8024682 | NM_021231   | C19orf29 | chromosome 19 open reading fram      | -0.024 | 0.983 | 8.62E-01 | 8.62E+01 |  |
| 8024687 | NM_014428   | TJP3     | tight junction protein 3 (zona occl  | -0.001 | 1.000 | 9.97E-01 | 9.97E+01 |  |
| 8024708 | NM_172251   | MRPL54   | mitochondrial ribosomal protein L    | -0.018 | 0.988 | 9.44E-01 | 9.44E+01 |  |
| 8024728 | NM_170678   | ITGB1BP3 | integrin beta 1 binding protein 3    | -0.064 | 0.957 | 5.23E-01 | 5.23E+01 |  |
| 8024740 | NM_015897   | PIAS4    | protein inhibitor of activated STAT  | -0.017 | 0.988 | 8.84E-01 | 8.84E+01 |  |
| 8024754 | NM_032607   | CREB3L3  | cAMP responsive element binding      | -0.084 | 0.943 | 2.56E-01 | 2.56E+01 |  |
| 8024768 | NM_133475   | ANKRD24  | ankyrin repeat domain 24             | -0.045 | 0.969 | 6.87E-01 | 6.87E+01 |  |
| 8024792 | NM_005755   | EBI3     | Epstein-Barr virus induced 3         | -0.225 | 0.856 | 8.90E-03 | 8.90E-01 |  |
| 8024798 | NM_018074   | CCDC94   | coiled-coil domain containing 94     | -0.059 | 0.960 | 6.82E-01 | 6.82E+01 |  |
| 8024816 | NM_024333   | FSD1     | fibronectin type III and SPRY doma   | -0.002 | 0.999 | 9.93E-01 | 9.93E+01 |  |
| 8024829 | NM_032868   | MPND     | MPN domain containing                | -0.016 | 0.989 | 9.02E-01 | 9.02E+01 |  |
| 8024843 | NM_005483   | CHAF1A   | chromatin assembly factor 1, subu    | 0.018  | 1.012 | 9.44E-01 | 9.44E+01 |  |
| 8024864 | NM_00100152 | HDGF2    | hepatoma-derived growth factor-2     | -0.081 | 0.945 | 2.86E-01 | 2.86E+01 |  |
| 8024882 | ---         | ---      | ---                                  | -0.045 | 0.969 | 8.22E-01 | 8.22E+01 |  |
| 8024896 | ---         | ---      | ---                                  | -0.064 | 0.957 | 5.89E-01 | 5.89E+01 |  |
| 8024898 | NM_018708   | FEM1A    | fem-1 homolog a (C. elegans)         | -0.017 | 0.988 | 9.44E-01 | 9.44E+01 |  |
| 8024900 | NM_00104820 | UHRF1    | ubiquitin-like with PHD and ring fi  | -0.041 | 0.972 | 7.95E-01 | 7.95E+01 |  |
| 8024909 | NM_015015   | KDM4B    | lysine (K)-specific demethylase 4B   | -0.042 | 0.972 | 7.15E-01 | 7.15E+01 |  |
| 8024936 | NM_002967   | SAFB     | scaffold attachment factor B         | 0.000  | 1.000 | 1.00E+00 | 1.00E+02 |  |

|         |                            |             |                                       |        |       |          |          |  |
|---------|----------------------------|-------------|---------------------------------------|--------|-------|----------|----------|--|
| 8024956 | NM_198706                  | HSD11B1L    | hydroxysteroid (11-beta) dehydro      | -0.047 | 0.968 | 7.45E-01 | 7.45E+01 |  |
| 8024966 | NM_015414                  | RPL36       | ribosomal protein L36                 | -0.020 | 0.987 | 9.02E-01 | 9.02E+01 |  |
| 8024995 | NM_004558                  | NRTN        | neurturin                             | -0.020 | 0.986 | 8.96E-01 | 8.96E+01 |  |
| 8025000 | NM_00101792                | VMAC        | vimentin-type intermediate filame     | -0.021 | 0.986 | 8.85E-01 | 8.85E+01 |  |
| 8025004 | NM_004058                  | CAPS        | calcyphosine                          | -0.039 | 0.973 | 7.09E-01 | 7.09E+01 |  |
| 8025028 | NM_006012                  | CLPP        | ClpP caseinolytic peptidase, ATP-d    | -0.067 | 0.955 | 5.13E-01 | 5.13E+01 |  |
| 8025035 | NM_032306                  | ALKBH7      | alkB, alkylation repair homolog 7 (   | 0.057  | 1.040 | 6.33E-01 | 6.33E+01 |  |
| 8025041 | NM_139161                  | CRB3        | crumbs homolog 3 (Drosophila)         | -0.034 | 0.977 | 7.89E-01 | 7.89E+01 |  |
| 8025051 | NM_006087                  | TUBB4       | tubulin, beta 4                       | -0.116 | 0.923 | 3.30E-01 | 3.30E+01 |  |
| 8025053 | NM_003811                  | TNFSF9      | tumor necrosis factor (ligand) sup    | -0.132 | 0.912 | 5.90E-02 | 5.90E+00 |  |
| 8025076 | NM_005428                  | VAV1        | vav 1 guanine nucleotide exchang      | 0.129  | 1.093 | 3.17E-01 | 3.17E+01 |  |
| 8025103 | NM_001974                  | EMR1        | egf-like module containing, mucin     | -0.128 | 0.915 | 7.89E-01 | 7.89E+01 |  |
| 8025126 | NM_144614                  | MBD3L2      | methyl-CpG binding domain prote       | -0.022 | 0.985 | 8.44E-01 | 8.44E+01 |  |
| 8025132 | NM_024341                  | ZNF557      | zinc finger protein 557               | -0.024 | 0.983 | 9.09E-01 | 9.09E+01 |  |
| 8025142 | NM_00113095                | ARHGEF18    | Rho/Rac guanine nucleotide excha      | 0.080  | 1.057 | 4.04E-01 | 4.04E+01 |  |
| 8025179 | NM_018083                  | ZNF358      | zinc finger protein 358               | 0.053  | 1.038 | 7.38E-01 | 7.38E+01 |  |
| 8025183 | NM_020533                  | MCOLN1      | mucolipin 1                           | 0.238  | 1.179 | 6.99E-02 | 6.99E+00 |  |
| 8025199 | NM_006702                  | PNPLA6      | patatin-like phospholipase domain     | 0.005  | 1.003 | 9.77E-01 | 9.77E+01 |  |
| 8025237 | NM_00108042                | KIAA1543    |                                       | -0.034 | 0.977 | 7.49E-01 | 7.49E+01 |  |
| 8025255 | NM_006949                  | STXBP2      | syntaxin binding protein 2            | 0.065  | 1.046 | 6.33E-01 | 6.33E+01 |  |
| 8025278 | NM_020415                  | RETN        | resistin                              | -0.042 | 0.971 | 8.46E-01 | 8.46E+01 |  |
| 8025285 | NM_174918                  | C19orf59    | chromosome 19 open reading fram       | -0.180 | 0.882 | 5.84E-01 | 5.84E+01 |  |
| 8025296 | NM_174894                  | TRAPPC5     | trafficking protein particle comple   | 0.073  | 1.052 | 5.76E-01 | 5.76E+01 |  |
| 8025301 | NR_026692                  | CD209       | CD209 molecule                        | 0.047  | 1.033 | 8.90E-01 | 8.90E+01 |  |
| 8025321 | NR_002931                  | CLEC4GP1    | C-type lectin domain family 4, me     | -0.036 | 0.976 | 7.97E-01 | 7.97E+01 |  |
| 8025328 | NM_00115994                | EVISL       | ecotropic viral integration site 5-li | -0.024 | 0.983 | 8.78E-01 | 8.78E+01 |  |
| 8025351 | NM_145185                  | MAP2K7      | mitogen-activated protein kinase      | -0.019 | 0.987 | 9.13E-01 | 9.13E+01 |  |
| 8025368 | NM_003083                  | SNAPC2      | small nuclear RNA activating comp     | 0.042  | 1.029 | 7.45E-01 | 7.45E+01 |  |
| 8025375 | NM_005624                  | CCL25       | chemokine (C-C motif) ligand 25       | -0.017 | 0.989 | 9.09E-01 | 9.09E+01 |  |
| 8025382 | NM_024552                  | LASS4       | LAG1 homolog, ceramide synthase       | 0.031  | 1.022 | 8.78E-01 | 8.78E+01 |  |
| 8025395 | NM_001031                  | RPS28       | ribosomal protein S28                 | 0.075  | 1.053 | 6.07E-01 | 6.07E+01 |  |
| 8025414 | NM_004218                  | RAB11B      | RAB11B, member RAS oncogene fa        | -0.036 | 0.975 | 8.75E-01 | 8.75E+01 |  |
| 8025421 | NM_016496                  | 40239       | membrane-associated ring finger       | 0.022  | 1.015 | 8.93E-01 | 8.93E+01 |  |
| 8025429 | NM_005968                  | HNRNPM      | heterogeneous nuclear ribonucleo      | -0.032 | 0.978 | 7.14E-01 | 7.14E+01 |  |
| 8025450 | NM_00100469                | OR2Z1       | olfactory receptor, family 2, subfa   | -0.047 | 0.968 | 8.04E-01 | 8.04E+01 |  |
| 8025456 | NM_00100445                | OR1M1       | olfactory receptor, family 1, subfa   | -0.040 | 0.973 | 8.49E-01 | 8.49E+01 |  |
| 8025458 | NM_020933                  | ZNF317      | zinc finger protein 317               | 0.001  | 1.001 | 9.95E-01 | 9.95E+01 |  |
| 8025478 | NM_032497                  | ZNF559      | zinc finger protein 559               | -0.052 | 0.965 | 8.15E-01 | 8.15E+01 |  |
| 8025488 | NM_003451                  | ZNF177      | zinc finger protein 177               | -0.014 | 0.990 | 9.54E-01 | 9.54E+01 |  |
| 8025498 | NR_000011 // DRA70 // SNOR |             | small nucleolar RNA, H/ACA box 7      | -0.027 | 0.981 | 9.13E-01 | 9.13E+01 |  |
| 8025500 | NM_024292                  | UBL5        | ubiquitin-like 5                      | 0.003  | 1.002 | 9.88E-01 | 9.88E+01 |  |
| 8025506 | NM_006221                  | PIN1        | peptidylprolyl cis/trans isomerase    | -0.043 | 0.971 | 7.46E-01 | 7.46E+01 |  |
| 8025515 | NM_015725                  | RDH8        | retinol dehydrogenase 8 (all-trans    | -0.048 | 0.968 | 6.63E-01 | 6.63E+01 |  |
| 8025551 | NM_018381                  | C19orf66    | chromosome 19 open reading fram       | -0.007 | 0.995 | 9.74E-01 | 9.74E+01 |  |
| 8025563 | NM_00104066                | PPAN-P2RY11 | PPAN-P2RY11 readthrough transcr       | -0.041 | 0.972 | 7.05E-01 | 7.05E+01 |  |
| 8025586 | NM_146388                  | MRPL4       | mitochondrial ribosomal protein L     | -0.016 | 0.989 | 9.27E-01 | 9.27E+01 |  |
| 8025601 | NM_000201                  | ICAM1       | intercellular adhesion molecule 1     | 0.057  | 1.041 | 8.77E-01 | 8.77E+01 |  |
| 8025612 | NM_022377                  | ICAM4       | intercellular adhesion molecule 4     | 0.026  | 1.018 | 8.97E-01 | 8.97E+01 |  |
| 8025621 | NM_003259                  | ICAM5       | intercellular adhesion molecule 5,    | -0.041 | 0.972 | 6.92E-01 | 6.92E+01 |  |
| 8025633 | NM_00111130                | PDE4A       | phosphodiesterase 4A, cAMP-spec       | -0.091 | 0.939 | 4.06E-01 | 4.06E+01 |  |
| 8025659 | NM_032885                  | ATG4D       | ATG4 autophagy related 4 homolo       | -0.047 | 0.968 | 6.58E-01 | 6.58E+01 |  |
| 8025672 | NM_020428                  | SLC44A2     | solute carrier family 44, member 2    | 0.041  | 1.029 | 8.34E-01 | 8.34E+01 |  |
| 8025697 | NM_012218                  | ILF3        | interleukin enhancer binding facto    | -0.086 | 0.942 | 4.88E-01 | 4.88E+01 |  |
| 8025728 | NM_031209                  | QTRT1       | queine tRNA-ribosyltransferase 1      | 0.003  | 1.002 | 9.87E-01 | 9.87E+01 |  |
| 8025741 | NM_00100536                | DNM2        | dynamain 2                            | -0.112 | 0.925 | 1.93E-01 | 1.93E+01 |  |
| 8025766 | NM_199141                  | CARM1       | coactivator-associated arginine me    | 0.062  | 1.044 | 6.44E-01 | 6.44E+01 |  |
| 8025783 | BC011833                   | C19orf52    | chromosome 19 open reading fram       | -0.022 | 0.985 | 9.16E-01 | 9.16E+01 |  |
| 8025788 | NM_00112884                | SMARCA4     | SWI/SNF related, matrix associat      | -0.092 | 0.938 | 3.70E-01 | 3.70E+01 |  |
| 8025828 | NM_000527                  | LDLR        | low density lipoprotein receptor      | -0.093 | 0.938 | 3.35E-01 | 3.35E+01 |  |
| 8025850 | NM_020812                  | DOCK6       | dedicator of cytokinesis 6            | -0.052 | 0.964 | 5.92E-01 | 5.92E+01 |  |
| 8025877 | NM_022737                  | LPPR2       | lipid phosphate phosphatase-relat     | 0.001  | 1.001 | 9.97E-01 | 9.97E+01 |  |
| 8025888 | NM_175871                  | C19orf39    | chromosome 19 open reading fram       | 0.006  | 1.004 | 9.73E-01 | 9.73E+01 |  |
| 8025895 | NM_002743                  | PRKCSH      | protein kinase C substrate 80K-H      | -0.042 | 0.972 | 7.43E-01 | 7.43E+01 |  |
| 8025918 | NM_001299                  | CNN1        | calponin 1, basic, smooth muscle      | -0.022 | 0.985 | 9.05E-01 | 9.05E+01 |  |
| 8025927 | NM_145295                  | ZNF627      | zinc finger protein 627               | 0.089  | 1.064 | 5.15E-01 | 5.15E+01 |  |
| 8025964 | NM_152262                  | ZNF439      | zinc finger protein 439               | 0.062  | 1.044 | 8.27E-01 | 8.27E+01 |  |
| 8025968 | NM_021915                  | ZNF69       | zinc finger protein 69                | -0.010 | 0.993 | 9.73E-01 | 9.73E+01 |  |
| 8025973 | NM_144566                  | ZNF700      | zinc finger protein 700               | 0.194  | 1.144 | 3.06E-02 | 3.06E+00 |  |
| 8025998 | NM_003437                  | ZNF136      | zinc finger protein 136               | -0.025 | 0.982 | 9.07E-01 | 9.07E+01 |  |
| 8026007 | NM_153358                  | ZNF791      | zinc finger protein 791               | -0.025 | 0.983 | 9.00E-01 | 9.00E+01 |  |
| 8026013 | NM_00109973                | MORG1       | mitogen-activated protein kinase      | 0.066  | 1.047 | 5.47E-01 | 5.47E+01 |  |
| 8026024 | NM_004317                  | ASNA1       | arsA arsenite transporter, ATP-bin    | -0.016 | 0.989 | 9.49E-01 | 9.49E+01 |  |
| 8026047 | NM_002229                  | JUNB        | jun B proto-oncogene                  | -0.102 | 0.932 | 3.64E-01 | 3.64E+01 |  |
| 8026051 | NM_006397                  | RNASEH2A    | ribonuclease H2, subunit A            | 0.001  | 1.001 | 9.98E-01 | 9.98E+01 |  |
| 8026063 | NM_014975                  | MAST1       | microtubule associated serine/thr     | 0.018  | 1.012 | 9.18E-01 | 9.18E+01 |  |
| 8026090 | NM_000159                  | GCDH        | glutaryl-Coenzyme A dehydrogena       | 0.037  | 1.026 | 7.90E-01 | 7.90E+01 |  |
| 8026122 | NM_005053                  | RAD23A      | RAD23 homolog A (S. cerevisiae)       | -0.048 | 0.967 | 7.20E-01 | 7.20E+01 |  |



|         |             |           |                                     |        |       |          |          |  |
|---------|-------------|-----------|-------------------------------------|--------|-------|----------|----------|--|
| 8026133 | NM_152654   | DAND5     | DAN domain family, member 5         | -0.055 | 0.963 | 6.51E-01 | 6.51E+01 |  |
| 8026139 | NM_002501   | NFIX      | nuclear factor I/X (CCAAT-binding   | -0.053 | 0.964 | 5.91E-01 | 5.91E+01 |  |
| 8026155 | NM_052876   | NACC1     | nucleus accumbens associated 1, f   | -0.008 | 0.994 | 9.68E-01 | 9.68E+01 |  |
| 8026163 | NM_004907   | IER2      | immediate early response 2          | -0.086 | 0.942 | 4.83E-01 | 4.83E+01 |  |
| 8026170 | NM_030818   | CCDC130   | coiled-coil domain containing 130   | -0.072 | 0.952 | 6.12E-01 | 6.12E+01 |  |
| 8026182 | NM_00103172 | MR1       | methylthioribose-1-phosphate iso    | -0.034 | 0.977 | 8.06E-01 | 8.06E+01 |  |
| 8026193 | NM_014047   | C19orf53  | chromosome 19 open reading fram     | -0.061 | 0.959 | 6.15E-01 | 6.15E+01 |  |
| 8026198 | NM_023072   | ZSWIM4    | zinc finger, SWIM-type containing   | -0.041 | 0.972 | 6.54E-01 | 6.54E+01 |  |
| 8026212 | ---         | ---       | ---                                 | -0.052 | 0.965 | 7.28E-01 | 7.28E+01 |  |
| 8026214 | NM_00109862 | NANOS3    | nanos homolog 3 (Drosophila)        | 0.047  | 1.033 | 6.01E-01 | 6.01E+01 |  |
| 8026217 | NM_017721   | CC2D1A    | coiled-coil and C2 domain contain   | -0.022 | 0.985 | 8.18E-01 | 8.18E+01 |  |
| 8026250 | NM_138353   | DCAF15    | DBB1 and CUL4 associated factor     | -0.033 | 0.977 | 8.03E-01 | 8.03E+01 |  |
| 8026265 | NM_080864   | RLN3      | relaxin 3                           | 0.018  | 1.013 | 9.08E-01 | 9.08E+01 |  |
| 8026272 | NM_004843   | IL27RA    | interleukin 27 receptor, alpha      | -0.019 | 0.987 | 9.15E-01 | 9.15E+01 |  |
| 8026292 | ---         | ---       | ---                                 | -0.113 | 0.925 | 1.75E-01 | 1.75E+01 |  |
| 8026294 | NR_024282   | LOC113230 | hypothetical protein LOC113230      | -0.051 | 0.965 | 6.66E-01 | 6.66E+01 |  |
| 8026298 | ---         | ---       | ---                                 | 0.037  | 1.026 | 7.88E-01 | 7.88E+01 |  |
| 8026300 | NM_078481   | CD97      | CD97 molecule                       | 0.055  | 1.039 | 7.73E-01 | 7.73E+01 |  |
| 8026315 | NM_213560   | PKN1      | protein kinase N1                   | -0.042 | 0.971 | 8.05E-01 | 8.05E+01 |  |
| 8026339 | NM_003096   | SNRPG     | small nuclear ribonucleoprotein p   | -0.016 | 0.989 | 9.42E-01 | 9.42E+01 |  |
| 8026341 | NM_138501   | TECR      | trans-2,3-enoyl-CoA reductase       | -0.054 | 0.963 | 7.91E-01 | 7.91E+01 |  |
| 8026350 | NM_207390   | CLEC17A   | C-type lectin domain family 17, m   | 0.000  | 1.000 | 1.00E+00 | 1.00E+02 |  |
| 8026361 | ---         | ---       | ---                                 | -0.006 | 0.996 | 9.88E-01 | 9.88E+01 |  |
| 8026363 | ---         | ---       | ---                                 | 0.068  | 1.048 | 8.24E-01 | 8.24E+01 |  |
| 8026388 | NM_012377   | OR7C2     | olfactory receptor, family 7, subfa | -0.060 | 0.959 | 7.23E-01 | 7.23E+01 |  |
| 8026390 | NM_173482   | CCDC105   | coiled-coil domain containing 105   | -0.026 | 0.982 | 8.48E-01 | 8.48E+01 |  |
| 8026405 | NM_00100471 | OR111     | olfactory receptor, family 1, subfa | 0.060  | 1.043 | 6.16E-01 | 6.16E+01 |  |
| 8026420 | ---         | ---       | ---                                 | 0.205  | 1.152 | 2.15E-01 | 2.15E+01 |  |
| 8026422 | ---         | ---       | ---                                 | 0.017  | 1.012 | 9.59E-01 | 9.59E+01 |  |
| 8026440 | NM_000984   | RPL23A    | ribosomal protein L23a              | -0.011 | 0.993 | 9.36E-01 | 9.36E+01 |  |
| 8026488 | NM_00100446 | OR10H5    | olfactory receptor, family 10, subf | -0.068 | 0.954 | 7.24E-01 | 7.24E+01 |  |
| 8026503 | NR_024335   | FLJ25328  | hypothetical LOC148231              | 0.013  | 1.009 | 9.56E-01 | 9.56E+01 |  |
| 8026513 | NM_00114516 | TPM4      | tropomyosin 4                       | -0.022 | 0.985 | 8.67E-01 | 8.67E+01 |  |
| 8026520 | NM_005370   | RAB8A     | RAB8A, member RAS oncogene fa       | 0.165  | 1.121 | 2.35E-01 | 2.35E+01 |  |
| 8026533 | NM_032855   | HS2D      | hematopoietic SH2 domain contain    | 0.061  | 1.043 | 7.27E-01 | 7.27E+01 |  |
| 8026541 | AF151902    | FAM32A    | family with sequence similarity 32  | 0.098  | 1.071 | 5.15E-01 | 5.15E+01 |  |
| 8026548 | NM_00113052 | AP1M1     | adaptor-related protein complex 1   | -0.090 | 0.939 | 3.03E-01 | 3.03E+01 |  |
| 8026564 | NM_016270   | KLF2      | Kruppel-like factor 2 (lung)        | -0.013 | 0.991 | 9.43E-01 | 9.43E+01 |  |
| 8026568 | NM_032207   | C19orf44  | chromosome 19 open reading fram     | -0.017 | 0.988 | 9.22E-01 | 9.22E+01 |  |
| 8026579 | NM_024074   | TMEM38A   | transmembrane protein 38A           | -0.040 | 0.972 | 7.57E-01 | 7.57E+01 |  |
| 8026610 | NM_015260   | SIN3B     | SIN3 homolog B, transcription reg   | -0.047 | 0.968 | 7.50E-01 | 7.50E+01 |  |
| 8026638 | NM_004145   | MYO9B     | myosin IXB                          | 0.059  | 1.042 | 6.82E-01 | 6.82E+01 |  |
| 8026679 | NM_018467   | USE1      | unconventional SNARE in the ER 1    | -0.062 | 0.958 | 6.24E-01 | 6.24E+01 |  |
| 8026687 | NM_024578   | OCE1L     | occludin/ELL domain containing 1    | -0.017 | 0.988 | 9.11E-01 | 9.11E+01 |  |
| 8026698 | NM_00103354 | C19orf62  | chromosome 19 open reading fram     | -0.046 | 0.969 | 7.11E-01 | 7.11E+01 |  |
| 8026712 | NM_152363   | ANKLE1    | ankyrin repeat and LEM domain co    | -0.069 | 0.953 | 4.34E-01 | 4.34E+01 |  |
| 8026724 | NM_023937   | MRPL34    | mitochondrial ribosomal protein L   | -0.067 | 0.955 | 5.84E-01 | 5.84E+01 |  |
| 8026729 | NM_024050   | DDA1      | DET1 and DDB1 associated 1          | -0.006 | 0.996 | 9.80E-01 | 9.80E+01 |  |
| 8026735 | NM_133644   | GTPBP3    | GTP binding protein 3 (mitochond    | 0.007  | 1.005 | 9.75E-01 | 9.75E+01 |  |
| 8026751 | NM_138401   | FAM125A   | family with sequence similarity 12  | -0.010 | 0.993 | 9.56E-01 | 9.56E+01 |  |
| 8026787 | NM_173544   | FAM129C   | family with sequence similarity 12  | 0.262  | 1.199 | 9.54E-03 | 9.54E-01 |  |
| 8026806 | NM_024656   | GLT2SD1   | glycosyltransferase 25 domain cor   | 0.144  | 1.105 | 2.49E-01 | 2.49E+01 |  |
| 8026821 | NM_018174   | MAP15     | microtubule-associated protein 15   | -0.028 | 0.980 | 7.56E-01 | 7.56E+01 |  |
| 8026830 | NM_015122   | FCHO1     | FCH domain only 1                   | -0.010 | 0.993 | 9.57E-01 | 9.57E+01 |  |
| 8026861 | NM_014256   | B3GNT3    | UDP-GlcNAc:betaGal beta-1,3-N-a     | -0.039 | 0.973 | 6.93E-01 | 6.93E+01 |  |
| 8026868 | NM_000980   | RPL18A    | ribosomal protein L18a              | -0.001 | 0.999 | 9.97E-01 | 9.97E+01 |  |
| 8026877 | NM_000453   | SLC5A5    | solute carrier family 5 (sodium iod | 0.018  | 1.013 | 8.95E-01 | 8.95E+01 |  |
| 8026895 | NM_138442   | CCDC124   | coiled-coil domain containing 124   | 0.018  | 1.013 | 8.71E-01 | 8.71E+01 |  |
| 8026900 | NM_002248   | KCNN1     | potassium intermediate/small con    | -0.001 | 1.000 | 9.98E-01 | 9.98E+01 |  |
| 8026915 | NM_015683   | ARRDC2    | arrestin domain containing 2        | -0.108 | 0.928 | 2.50E-01 | 2.50E+01 |  |
| 8026926 | NM_015016   | MAST3     | microtubule associated serine/thr   | -0.106 | 0.929 | 2.81E-01 | 2.81E+01 |  |
| 8026954 | NM_005027   | PIK3R2    | phosphoinositide-3-kinase, regula   | -0.019 | 0.987 | 9.17E-01 | 9.17E+01 |  |
| 8026982 | NM_032683   | MPV17L2   | MPV17 mitochondrial membrane        | -0.002 | 0.999 | 9.89E-01 | 9.89E+01 |  |
| 8026991 | NM_017712   | PGPEP1    | pyroglutamyl-peptidase I            | -0.026 | 0.982 | 8.51E-01 | 8.51E+01 |  |
| 8027002 | NM_004864   | GDF15     | growth differentiation factor 15    | -0.042 | 0.972 | 8.05E-01 | 8.05E+01 |  |
| 8027006 | NM_032627   | SSBP4     | single stranded DNA binding prote   | 0.050  | 1.035 | 6.54E-01 | 6.54E+01 |  |
| 8027018 | BC001080    | C19orf50  | chromosome 19 open reading fram     | -0.043 | 0.971 | 6.10E-01 | 6.10E+01 |  |
| 8027024 | NM_00103393 | UBA52     | ubiquitin A-52 residue ribosomal p  | -0.002 | 0.999 | 9.93E-01 | 9.93E+01 |  |
| 8027032 | NM_00110041 | C19orf60  | chromosome 19 open reading fram     | -0.067 | 0.955 | 3.75E-01 | 3.75E+01 |  |
| 8027040 | NM_012109   | TMEM59L   | transmembrane protein 59-like       | 0.006  | 1.004 | 9.73E-01 | 9.73E+01 |  |
| 8027049 | NM_018316   | KLHL26    | kelch-like 26 (Drosophila)          | -0.009 | 0.994 | 9.63E-01 | 9.63E+01 |  |
| 8027053 | NM_00109848 | CRTC1     | CREB regulated transcription coac   | 0.022  | 1.016 | 8.92E-01 | 8.92E+01 |  |
| 8027074 | NM_002911   | UPF1      | UPF1 regulator of nonsense trans    | -0.046 | 0.968 | 6.96E-01 | 6.96E+01 |  |
| 8027100 | NM_019070   | DDX49     | DEAD (Asp-Glu-Ala-Asp) box polyp    | 0.055  | 1.039 | 4.29E-01 | 4.29E+01 |  |
| 8027117 | NM_033415   | ARMC6     | armadillo repeat containing 6       | -0.036 | 0.975 | 7.72E-01 | 7.72E+01 |  |
| 8027128 | NM_178526   | SLC25A42  | solute carrier family 25, member 4  | -0.030 | 0.980 | 7.90E-01 | 7.90E+01 |  |
| 8027139 | NM_003721   | RFXANK    | regulatory factor X-associated ank  | 0.078  | 1.056 | 5.89E-01 | 5.89E+01 |  |

|         |             |           |                                      |        |       |          |          |
|---------|-------------|-----------|--------------------------------------|--------|-------|----------|----------|
| 8027152 | NM_004386   | NCAN      | neurocan                             | -0.027 | 0.982 | 8.80E-01 | 8.80E+01 |
| 8027169 | NM_017660   | GATAD2A   | GATA zinc finger domain containin    | -0.023 | 0.984 | 8.05E-01 | 8.05E+01 |
| 8027184 | NM_015329   | KIAA0892  | KIAA0892                             | -0.049 | 0.966 | 6.24E-01 | 6.24E+01 |
| 8027205 | NM_015965   | NDUFA13   | NADH dehydrogenase (ubiquinone       | 0.099  | 1.071 | 5.59E-01 | 5.59E+01 |
| 8027213 | NM_198537   | YJEFN3    | YjeF N-terminal domain containing    | -0.046 | 0.968 | 6.80E-01 | 6.80E+01 |
| 8027222 | NM_153221   | CILP2     | cartilage intermediate layer protei  | -0.003 | 0.998 | 9.85E-01 | 9.85E+01 |
| 8027233 | NM_033204   | ZNF101    | zinc finger protein 101              | 0.031  | 1.022 | 8.92E-01 | 8.92E+01 |
| 8027247 | NM_031218   | ZNF93     | zinc finger protein 93               | 0.196  | 1.146 | 1.11E-01 | 1.11E+01 |
| 8027258 | AK298173    | ZNF90     | zinc finger protein 90               | -0.079 | 0.947 | 6.41E-01 | 6.41E+01 |
| 8027268 | BC067843    | ZNF66     | zinc finger protein 66               | -0.100 | 0.933 | 5.23E-01 | 5.23E+01 |
| 8027272 | NM_003429   | ZNF85     | zinc finger protein 85               | 0.098  | 1.070 | 3.80E-01 | 3.80E+01 |
| 8027279 | NM_025189   | ZNF430    | zinc finger protein 430              | 0.052  | 1.037 | 7.75E-01 | 7.75E+01 |
| 8027285 | NM_182515   | ZNF714    | zinc finger protein 714              | 0.042  | 1.030 | 8.16E-01 | 8.16E+01 |
| 8027297 | NR_027130   | ZNF738    | zinc finger protein 738              | 0.008  | 1.005 | 9.78E-01 | 9.78E+01 |
| 8027320 | NR_024523   | LOC641367 | cyclin Y-like pseudogene             | 0.052  | 1.037 | 8.31E-01 | 8.31E+01 |
| 8027330 | NM_00101166 | PCGF6     | polycomb group ring finger 6         | 0.048  | 1.034 | 8.77E-01 | 8.77E+01 |
| 8027343 | AK302042    | LOC440518 | similar to Golgin subfamily A mem    | 0.009  | 1.006 | 9.75E-01 | 9.75E+01 |
| 8027345 | NM_020855   | ZNF492    | zinc finger protein 492              | -0.042 | 0.971 | 9.01E-01 | 9.01E+01 |
| 8027348 | AK131472    | ZNF730    | zinc finger protein 730              | 0.153  | 1.112 | 5.24E-01 | 5.24E+01 |
| 8027352 | ---         | ---       | ---                                  | -0.009 | 0.994 | 9.75E-01 | 9.75E+01 |
| 8027368 | NM_203282   | ZNF254    | zinc finger protein 254              | 0.060  | 1.042 | 6.66E-01 | 6.66E+01 |
| 8027377 | ---         | ---       | ---                                  | -0.077 | 0.948 | 6.50E-01 | 6.50E+01 |
| 8027381 | ---         | ---       | ---                                  | -0.029 | 0.980 | 7.73E-01 | 7.73E+01 |
| 8027385 | NM_00114633 | VSTM2B    | V-set and transmembrane domain       | -0.010 | 0.993 | 9.45E-01 | 9.45E+01 |
| 8027390 | NM_006627   | POP4      | processing of precursor 4, ribonuc   | 0.072  | 1.051 | 7.09E-01 | 7.09E+01 |
| 8027398 | NM_024310   | PLEKHF1   | pleckstrin homology domain conta     | -0.063 | 0.958 | 5.76E-01 | 5.76E+01 |
| 8027414 | ---         | ---       | ---                                  | -0.023 | 0.984 | 9.27E-01 | 9.27E+01 |
| 8027416 | NM_003796   | C19orf2   | chromosome 19 open reading fran      | -0.062 | 0.958 | 6.45E-01 | 6.45E+01 |
| 8027429 | ---         | ---       | ---                                  | 0.063  | 1.045 | 8.47E-01 | 8.47E+01 |
| 8027437 | ---         | ---       | ---                                  | 0.010  | 1.007 | 9.83E-01 | 9.83E+01 |
| 8027439 | NM_00113615 | ZNF507    | zinc finger protein 507              | 0.009  | 1.006 | 9.78E-01 | 9.78E+01 |
| 8027473 | NM_004708   | PDCD5     | programmed cell death 5              | -0.027 | 0.981 | 8.45E-01 | 8.45E+01 |
| 8027510 | NM_152266   | C19orf40  | chromosome 19 open reading fran      | 0.009  | 1.006 | 9.63E-01 | 9.63E+01 |
| 8027521 | NM_018025   | GPATCH1   | G patch domain containing 1          | 0.024  | 1.017 | 9.17E-01 | 9.17E+01 |
| 8027556 | NM_002333   | LRP3      | low density lipoprotein receptor-r   | -0.092 | 0.938 | 2.65E-01 | 2.65E+01 |
| 8027566 | NM_001806   | CEBPG     | CCAAT/enhancer binding protein (     | 0.018  | 1.013 | 9.17E-01 | 9.17E+01 |
| 8027574 | NM_022467   | CHST8     | carbohydrate (N-acetyl)galactosam    | -0.041 | 0.972 | 6.89E-01 | 6.89E+01 |
| 8027584 | NM_024076   | KCTD15    | potassium channel tetramerisation    | 0.038  | 1.027 | 7.72E-01 | 7.72E+01 |
| 8027592 | NM_00111409 | LSM14A    | LSM14A, SCD6 homolog A (S. cere      | 0.009  | 1.006 | 9.44E-01 | 9.44E+01 |
| 8027604 | NM_014686   | KIAA0355  | KIAA0355                             | -0.032 | 0.978 | 8.48E-01 | 8.48E+01 |
| 8027621 | NM_000175   | GPI       | glucose phosphate isomerase          | 0.112  | 1.080 | 4.74E-01 | 4.74E+01 |
| 8027642 | NM_032346   | PDCD2L    | programmed cell death 2-like         | -0.085 | 0.943 | 6.46E-01 | 6.46E+01 |
| 8027650 | NM_005499   | UBA2      | ubiquitin-like modifier activating e | 0.027  | 1.019 | 8.68E-01 | 8.68E+01 |
| 8027665 | NM_00108043 | WTIP      | Wilms tumor 1 interacting protein    | -0.011 | 0.992 | 9.47E-01 | 9.47E+01 |
| 8027674 | NM_018443   | ZNF302    | zinc finger protein 302              | -0.013 | 0.991 | 9.58E-01 | 9.58E+01 |
| 8027685 | NM_00102999 | ZNF181    | zinc finger protein 181              | -0.061 | 0.958 | 7.97E-01 | 7.97E+01 |
| 8027701 | NM_020895   | GRAMD1A   | GRAM domain containing 1A            | -0.222 | 0.857 | 2.37E-02 | 2.37E+00 |
| 8027719 | NM_001037   | SCN1B     | sodium channel, voltage-gated, ty    | -0.069 | 0.953 | 5.17E-01 | 5.17E+01 |
| 8027728 | NM_182983   | HPN       | hepsin                               | -0.050 | 0.966 | 5.75E-01 | 5.75E+01 |
| 8027748 | NM_021910   | FXYD3     | FXYD domain containing ion trans     | -0.044 | 0.970 | 7.36E-01 | 7.36E+01 |
| 8027760 | NM_005031   | FXYD1     | FXYD domain containing ion trans     | -0.018 | 0.988 | 9.09E-01 | 9.09E+01 |
| 8027770 | NM_022006   | FXYD7     | FXYD domain containing ion trans     | 0.001  | 1.001 | 9.96E-01 | 9.96E+01 |
| 8027778 | NM_144779   | FXYD5     | FXYD domain containing ion trans     | -0.014 | 0.991 | 9.63E-01 | 9.63E+01 |
| 8027793 | NM_205834   | LSR       | lipolysis stimulated lipoprotein re  | -0.071 | 0.952 | 2.98E-01 | 2.98E+01 |
| 8027805 | NM_003367   | USF2      | upstream transcription factor 2, c   | -0.036 | 0.975 | 7.97E-01 | 7.97E+01 |
| 8027819 | NM_021175   | HAMP      | hepcidin antimicrobial peptide       | 0.002  | 1.001 | 9.92E-01 | 9.92E+01 |
| 8027837 | NM_001771   | CD22      | CD22 molecule                        | 0.274  | 1.209 | 1.35E-01 | 1.35E+01 |
| 8027854 | NM_005303   | FFAR1     | free fatty acid receptor 1           | -0.048 | 0.967 | 6.57E-01 | 6.57E+01 |
| 8027856 | NM_005304   | FFAR3     | free fatty acid receptor 3           | -0.056 | 0.962 | 5.95E-01 | 5.95E+01 |
| 8027876 | NM_032635   | TMEM147   | transmembrane protein 147            | 0.061  | 1.043 | 6.23E-01 | 6.23E+01 |
| 8027884 | ---         | ---       | ---                                  | -0.039 | 0.973 | 8.78E-01 | 8.78E+01 |
| 8027886 | NM_015302   | HAUS5     | HAUS augmin-like complex, subun      | -0.026 | 0.982 | 8.08E-01 | 8.08E+01 |
| 8027908 | NM_024321   | RBM42     | RNA binding motif protein 42         | -0.081 | 0.945 | 5.53E-01 | 5.53E+01 |
| 8027920 | NM_014209   | ETV2      | ets variant 2                        | -0.005 | 0.996 | 9.77E-01 | 9.77E+01 |
| 8027932 | NM_001863   | COX6B1    | cytochrome c oxidase subunit Vlb     | -0.002 | 0.999 | 9.91E-01 | 9.91E+01 |
| 8027947 | NM_014383   | ZBTB32    | zinc finger and BTB domain contai    | 0.006  | 1.004 | 9.76E-01 | 9.76E+01 |
| 8027956 | NM_014727   | MLL4      | myeloid/lymphoid or mixed-lineag     | -0.005 | 0.997 | 9.75E-01 | 9.75E+01 |
| 8027996 | NM_172341   | PSENEN    | presenilin enhancer 2 homolog (C     | 0.041  | 1.029 | 8.13E-01 | 8.13E+01 |
| 8028002 | ---         | ---       | ---                                  | -0.175 | 0.886 | 6.66E-01 | 6.66E+01 |
| 8028004 | NM_019104   | LIN37     | lin-37 homolog (C. elegans)          | -0.065 | 0.956 | 5.86E-01 | 5.86E+01 |
| 8028016 | NM_00103988 | C19orf55  | chromosome 19 open reading fran      | -0.024 | 0.983 | 8.71E-01 | 8.71E+01 |
| 8028030 | NM_052948   | SNX26     | sorting nexin 26                     | -0.070 | 0.953 | 4.41E-01 | 4.41E+01 |
| 8028058 | NM_199180   | KIRREL2   | kin of IRRE like 2 (Drosophila)      | 0.060  | 1.043 | 6.78E-01 | 6.78E+01 |
| 8028102 | ---         | ---       | ---                                  | -0.021 | 0.985 | 9.24E-01 | 9.24E+01 |
| 8028104 | NM_014266   | HCS1      | hematopoietic cell signal transduc   | 0.260  | 1.198 | 1.43E-02 | 1.43E+00 |
| 8028112 | NM_024509   | LRFN3     | leucine rich repeat and fibronectin  | -0.019 | 0.987 | 9.33E-01 | 9.33E+01 |
| 8028117 | ---         | ---       | ---                                  | -0.156 | 0.898 | 2.41E-01 | 2.41E+01 |

|         |              |              |                                             |        |       |          |          |
|---------|--------------|--------------|---------------------------------------------|--------|-------|----------|----------|
| 8028119 | NM_00108396  | WDR62        | WD repeat domain 62                         | -0.088 | 0.941 | 7.90E-02 | 7.90E+00 |
| 8028158 | ---          | ---          | ---                                         | 0.006  | 1.004 | 9.76E-01 | 9.76E+01 |
| 8028162 | NM_001281    | TBCB         | tubulin folding cofactor B                  | -0.042 | 0.971 | 7.52E-01 | 7.52E+01 |
| 8028172 | NM_001749    | CAPNS1       | calpain, small subunit 1                    | -0.081 | 0.946 | 6.70E-01 | 6.70E+01 |
| 8028186 | NM_007145    | ZNF146       | zinc finger protein 146                     | -0.020 | 0.986 | 9.14E-01 | 9.14E+01 |
| 8028190 | ENST00000418 | LOC100131606 | hypothetical protein LOC100131606           | -0.115 | 0.923 | 3.94E-01 | 3.94E+01 |
| 8028192 | ---          | ---          | ---                                         | -0.103 | 0.931 | 3.16E-01 | 3.16E+01 |
| 8028219 | NM_144689    | ZNF420       | zinc finger protein 420                     | 0.010  | 1.007 | 9.74E-01 | 9.74E+01 |
| 8028233 | NM_181786    | HKR1         | GLI-Kruppel family member HKR1              | -0.005 | 0.997 | 9.85E-01 | 9.85E+01 |
| 8028241 | NM_032453    | ZNF527       | zinc finger protein 527                     | -0.044 | 0.970 | 7.87E-01 | 7.87E+01 |
| 8028248 | NM_144694    | ZNF570       | zinc finger protein 570                     | 0.000  | 1.000 | 1.00E+00 | 1.00E+02 |
| 8028286 | NM_015073    | SIPA1L3      | signal-induced proliferation-associated     | -0.075 | 0.950 | 3.89E-01 | 3.89E+01 |
| 8028309 | ---          | ---          | ---                                         | 0.052  | 1.037 | 8.92E-01 | 8.92E+01 |
| 8028311 | NM_021102    | SPINT2       | serine peptidase inhibitor, Kunitz type     | 0.030  | 1.021 | 8.78E-01 | 8.78E+01 |
| 8028323 | ---          | ---          | ---                                         | 0.009  | 1.006 | 9.74E-01 | 9.74E+01 |
| 8028325 | NM_033520    | C19orf33     | chromosome 19 open reading frame 33         | -0.049 | 0.966 | 6.44E-01 | 6.44E+01 |
| 8028332 | NM_004823    | KCNK6        | potassium channel, subfamily K, member 6    | 0.090  | 1.065 | 3.09E-01 | 3.09E+01 |
| 8028341 | NM_021185    | CATSPERG     | cation channel, sperm-associated, related   | -0.061 | 0.959 | 5.24E-01 | 5.24E+01 |
| 8028380 | NM_002812    | PSMD8        | proteasome (prosome, macropain)             | 0.030  | 1.021 | 8.91E-01 | 8.91E+01 |
| 8028389 | NM_00104252  | SPRED3       | sprouty-related, EVH1 domain containing     | -0.087 | 0.941 | 4.48E-01 | 4.48E+01 |
| 8028397 | NM_174905    | FAM98C       | family with sequence similarity 98          | -0.107 | 0.928 | 2.02E-01 | 2.02E+01 |
| 8028407 | NM_000540    | RYR1         | ryanodine receptor 1 (skeletal)             | 0.020  | 1.014 | 8.08E-01 | 8.08E+01 |
| 8028514 | NM_013234    | EIF3K        | eukaryotic translation initiation factor 3K | 0.010  | 1.007 | 9.67E-01 | 9.67E+01 |
| 8028524 | NM_004924    | ACTN4        | actinin, alpha 4                            | -0.054 | 0.963 | 7.94E-01 | 7.94E+01 |
| 8028546 | NM_002307    | LGALS7       | lectin, galactoside-binding, soluble        | -0.012 | 0.992 | 9.30E-01 | 9.30E+01 |
| 8028552 | NM_002503    | NFKBIB       | nuclear factor of kappa light polypeptide   | -0.056 | 0.962 | 5.48E-01 | 5.48E+01 |
| 8028583 | NM_00101483  | PAK4         | p21 protein (Cdc42/Rac)-activated           | -0.020 | 0.986 | 8.63E-01 | 8.63E+01 |
| 8028600 | NM_00100141  | NCCRP1       | non-specific cytotoxic cell receptor        | -0.058 | 0.961 | 3.98E-01 | 3.98E+01 |
| 8028607 | NM_172138    | IL28A        | interleukin 28A (interferon, lambda)        | -0.034 | 0.977 | 8.68E-01 | 8.68E+01 |
| 8028613 | NM_172140    | IL29         | interleukin 29 (interferon, lambda)         | 0.016  | 1.011 | 9.20E-01 | 9.20E+01 |
| 8028624 | NM_018028    | SAMD4B       | sterile alpha motif domain containing       | -0.089 | 0.940 | 2.82E-01 | 2.82E+01 |
| 8028643 | ---          | ---          | ---                                         | -0.039 | 0.973 | 8.16E-01 | 8.16E+01 |
| 8028645 | NM_017592    | MED29        | mediator complex subunit 29                 | -0.015 | 0.989 | 9.34E-01 | 9.34E+01 |
| 8028652 | NM_003407    | ZFP36        | zinc finger protein 36, C3H type, homeo     | -0.108 | 0.928 | 3.54E-01 | 3.54E+01 |
| 8028656 | NM_022835    | PLEKHG2      | pleckstrin homology domain containing       | -0.093 | 0.938 | 5.30E-01 | 5.30E+01 |
| 8028674 | NM_003169    | SUPT5H       | suppressor of Ty 5 homolog (S. cerevisiae)  | -0.188 | 0.878 | 3.13E-03 | 3.13E-01 |
| 8028705 | NM_00100156  | TIMM50       | translocase of inner mitochondrial membrane | -0.008 | 0.994 | 9.70E-01 | 9.70E+01 |
| 8028730 | NM_182704    | SELV         | selenoprotein V                             | -0.005 | 0.996 | 9.72E-01 | 9.72E+01 |
| 8028750 | NM_203471    | LGALS14      | lectin, galactoside-binding, soluble        | -0.038 | 0.974 | 7.97E-01 | 7.97E+01 |
| 8028756 | NM_006503    | PSMC4        | proteasome (prosome, macropain)             | -0.068 | 0.954 | 6.88E-01 | 6.88E+01 |
| 8028778 | NM_002446    | MAP3K10      | mitogen-activated protein kinase 10         | -0.048 | 0.967 | 4.73E-01 | 4.73E+01 |
| 8028791 | NM_012268    | PLD3         | phospholipase D family, member 3            | 0.260  | 1.198 | 6.01E-03 | 6.01E-01 |
| 8028806 | NM_020971    | SPTBN4       | spectrin, beta, non-erythrocytic 4          | -0.052 | 0.964 | 5.84E-01 | 5.84E+01 |
| 8028851 | NM_138392    | SHKBP1       | SH3KBP1 binding protein 1                   | -0.048 | 0.967 | 6.90E-01 | 6.90E+01 |
| 8028872 | NM_00104254  | LTPB4        | latent transforming growth factor           | 0.006  | 1.004 | 9.66E-01 | 9.66E+01 |
| 8028908 | NM_025194    | ITPKC        | inositol 1,4,5-trisphosphate 3-kinase       | -0.063 | 0.957 | 5.55E-01 | 5.55E+01 |
| 8028916 | NM_004596    | SNRPA        | small nuclear ribonucleoprotein A           | 0.130  | 1.094 | 2.65E-01 | 2.65E+01 |
| 8028924 | NM_006533    | MIA          | melanoma inhibitory activity                | -0.006 | 0.996 | 9.76E-01 | 9.76E+01 |
| 8028930 | NM_016154    | RAB4B        | RAB4B, member RAS oncogene family           | -0.006 | 0.996 | 9.79E-01 | 9.79E+01 |
| 8028940 | NM_080732    | EGLN2        | egl nine homolog 2 (C. elegans)             | 0.003  | 1.002 | 9.88E-01 | 9.88E+01 |
| 8028973 | NM_000766    | CYP2A13      | cytochrome P450, family 2, subfamily        | -0.046 | 0.969 | 6.24E-01 | 6.24E+01 |
| 8028984 | NM_000774    | CYP2F1       | cytochrome P450, family 2, subfamily        | 0.022  | 1.015 | 9.49E-01 | 9.49E+01 |
| 8028991 | NM_030622    | CYP2S1       | cytochrome P450, family 2, subfamily        | 0.063  | 1.044 | 5.84E-01 | 5.84E+01 |
| 8029006 | NM_021913    | AXL          | AXL receptor tyrosine kinase                | -0.017 | 0.988 | 8.93E-01 | 8.93E+01 |
| 8029029 | NM_007040    | HNRNPUL1     | heterogeneous nuclear ribonucleoprotein     | -0.087 | 0.941 | 2.68E-01 | 2.68E+01 |
| 8029050 | NM_052848    | CCDC97       | coiled-coil domain containing 97            | -0.104 | 0.931 | 2.63E-01 | 2.63E+01 |
| 8029056 | NM_00104259  | TMEM91       | transmembrane protein 91                    | -0.018 | 0.988 | 9.02E-01 | 9.02E+01 |
| 8029065 | NM_000709    | BCKDHA       | branched chain keto acid dehydrogenase      | -0.008 | 0.995 | 9.74E-01 | 9.74E+01 |
| 8029076 | NM_00109850  | CEACAM21     | carcinoembryonic antigen-related            | 0.125  | 1.090 | 3.10E-01 | 3.10E+01 |
| 8029107 | NM_001815    | CEACAM3      | carcinoembryonic antigen-related            | -0.031 | 0.979 | 7.95E-01 | 7.95E+01 |
| 8029117 | NM_00104028  | DMRTC2       | DMRT-like family C2                         | -0.020 | 0.986 | 8.97E-01 | 8.97E+01 |
| 8029129 | NM_001022    | RPS19        | ribosomal protein S19                       | -0.081 | 0.945 | 4.49E-01 | 4.49E+01 |
| 8029136 | NM_001783    | CD79A        | CD79a molecule, immunoglobulin              | 0.259  | 1.196 | 7.19E-02 | 7.19E+00 |
| 8029147 | NM_199002    | ARHGEF1      | Rho guanine nucleotide exchange             | -0.120 | 0.920 | 2.12E-01 | 2.12E+01 |
| 8029182 | NM_022752    | ZNF574       | zinc finger protein 574                     | -0.035 | 0.976 | 8.48E-01 | 8.48E+01 |
| 8029188 | NM_133444    | ZNF526       | zinc finger protein 526                     | -0.030 | 0.979 | 8.54E-01 | 8.54E+01 |
| 8029193 | NM_015125    | CIC          | capicua homolog (Drosophila)                | -0.038 | 0.974 | 7.07E-01 | 7.07E+01 |
| 8029219 | NM_173633    | TMEM145      | transmembrane protein 145                   | -0.005 | 0.997 | 9.85E-01 | 9.85E+01 |
| 8029236 | NM_001410    | MEGF8        | multiple EGF-like-domains 8                 | -0.025 | 0.982 | 8.31E-01 | 8.31E+01 |
| 8029273 | NM_001410    | MEGF8        | multiple EGF-like-domains 8                 | -0.018 | 0.988 | 9.54E-01 | 9.54E+01 |
| 8029280 | NM_020406    | CD177        | CD177 molecule                              | -0.008 | 0.994 | 9.73E-01 | 9.73E+01 |
| 8029299 | ---          | ---          | ---                                         | 0.012  | 1.008 | 9.61E-01 | 9.61E+01 |
| 8029301 | NM_174945    | ZNF575       | zinc finger protein 575                     | -0.028 | 0.981 | 8.13E-01 | 8.13E+01 |
| 8029311 | NM_024327    | ZNF576       | zinc finger protein 576                     | -0.146 | 0.904 | 1.78E-01 | 1.78E+01 |
| 8029318 | NM_019612    | IRGC         | immunity-related GTPase family, class       | 0.006  | 1.004 | 9.77E-01 | 9.77E+01 |
| 8029340 | NM_003445    | ZNF155       | zinc finger protein 155                     | -0.043 | 0.971 | 8.88E-01 | 8.88E+01 |
| 8029375 | ---          | ---          | ---                                         | -0.038 | 0.974 | 8.35E-01 | 8.35E+01 |

|         |              |          |                                      |        |       |          |          |
|---------|--------------|----------|--------------------------------------|--------|-------|----------|----------|
| 8029377 | NM_013398    | ZNF224   | zinc finger protein 224              | 0.014  | 1.009 | 9.49E-01 | 9.49E+01 |
| 8029385 | NM_013362    | ZNF225   | zinc finger protein 225              | 0.075  | 1.053 | 6.51E-01 | 6.51E+01 |
| 8029392 | NM_006630    | ZNF234   | zinc finger protein 234              | 0.096  | 1.068 | 5.91E-01 | 5.91E+01 |
| 8029399 | NM_00114622  | ZNF226   | zinc finger protein 226              | -0.055 | 0.962 | 7.01E-01 | 7.01E+01 |
| 8029413 | NM_182490    | ZNF227   | zinc finger protein 227              | -0.033 | 0.977 | 8.80E-01 | 8.80E+01 |
| 8029423 | NM_181756    | ZNF233   | zinc finger protein 233              | 0.059  | 1.042 | 7.45E-01 | 7.45E+01 |
| 8029437 | NM_006505    | PVR      | poliovirus receptor                  | -0.135 | 0.911 | 1.82E-01 | 1.82E+01 |
| 8029446 | NM_00112789  | CEACAM19 | carcinoembryonic antigen-related     | -0.028 | 0.981 | 8.31E-01 | 8.31E+01 |
| 8029458 | NM_00103921  | CEACAM16 | carcinoembryonic antigen-related     | -0.018 | 0.987 | 8.82E-01 | 8.82E+01 |
| 8029465 | NM_005178    | BCL3     | B-cell CLL/lymphoma 3                | 0.014  | 1.010 | 9.47E-01 | 9.47E+01 |
| 8029476 | NM_012116    | CBLC     | Cas-Br-M (murine) ecotropic retro    | -0.024 | 0.983 | 8.63E-01 | 8.63E+01 |
| 8029507 | NM_002856    | PVRL2    | poliovirus receptor-related 2 (herp  | 0.025  | 1.018 | 8.89E-01 | 8.89E+01 |
| 8029521 | NM_00112891  | TOMM40   | translocase of outer mitochondria    | -0.005 | 0.996 | 9.78E-01 | 9.78E+01 |
| 8029530 | NM_000041    | APOE     | apolipoprotein E                     | 0.038  | 1.027 | 6.75E-01 | 6.75E+01 |
| 8029541 | NM_001646    | APOC4    | apolipoprotein C-IV                  | 0.081  | 1.058 | 1.08E-01 | 1.08E+01 |
| 8029551 | NM_000483    | APOC2    | apolipoprotein C-II                  | 0.015  | 1.010 | 9.01E-01 | 9.01E+01 |
| 8029560 | NM_001294    | CLPTM1   | cleft lip and palate associated tran | 0.034  | 1.024 | 7.83E-01 | 7.83E+01 |
| 8029580 | NM_006509    | RELB     | v-rel reticuloendotheliosis viral on | -0.056 | 0.962 | 7.25E-01 | 7.25E+01 |
| 8029592 | NM_007056    | SFRS16   | splicing factor, arginine/serine-ric | 0.021  | 1.015 | 9.33E-01 | 9.33E+01 |
| 8029615 | ---          | ---      | ---                                  | 0.316  | 1.245 | 2.44E-01 | 2.44E+01 |
| 8029624 | ENST00000421 | LRRC68   | leucine rich repeat containing 68    | 0.038  | 1.027 | 6.58E-01 | 6.58E+01 |
| 8029640 | NM_212550    | BLOC1S3  | biogenesis of lysosomal organelles   | -0.085 | 0.942 | 2.63E-01 | 2.63E+01 |
| 8029642 | NM_031417    | MARK4    | MAP/microtubule affinity-regulati    | -0.004 | 0.997 | 9.82E-01 | 9.82E+01 |
| 8029671 | NM_177417    | KLC3     | kinesin light chain 3                | -0.051 | 0.965 | 4.32E-01 | 4.32E+01 |
| 8029688 | NM_012099    | CD3EAP   | CD3e molecule, epsilon associated    | -0.088 | 0.941 | 2.45E-01 | 2.45E+01 |
| 8029701 | NM_00108040  | FLJ40125 | protein phosphatase 1B-like          | 0.082  | 1.058 | 7.07E-01 | 7.07E+01 |
| 8029710 | NM_003370    | VASP     | vasodilator-stimulated phosphopr     | -0.039 | 0.973 | 7.68E-01 | 7.68E+01 |
| 8029728 | NM_000164    | GIPR     | gastric inhibitory polypeptide rece  | -0.052 | 0.964 | 5.97E-01 | 5.97E+01 |
| 8029744 | NM_017659    | QPCTL    | glutaminyl-peptide cyclotransferas   | 0.003  | 1.002 | 9.86E-01 | 9.86E+01 |
| 8029754 | NM_004497    | FOXA3    | forkhead box A3                      | -0.037 | 0.975 | 7.64E-01 | 7.64E+01 |
| 8029759 | NM_00108040  | CCDC61   | coiled-coil domain containing 61     | -0.076 | 0.949 | 5.21E-01 | 5.21E+01 |
| 8029773 | NM_00100291  | IGFL2    | IGF-like family member 2             | -0.052 | 0.965 | 6.68E-01 | 6.68E+01 |
| 8029779 | NM_198541    | IGFL1    | IGF-like family member 1             | -0.070 | 0.953 | 4.47E-01 | 4.47E+01 |
| 8029784 | NM_152794    | HIF3A    | hypoxia inducible factor 3, alpha s  | -0.060 | 0.959 | 5.52E-01 | 5.52E+01 |
| 8029814 | NM_006247    | PP5C     | protein phosphatase 5, catalytic su  | 0.061  | 1.043 | 6.70E-01 | 6.70E+01 |
| 8029831 | NM_005184    | CALM3    | calmodulin 3 (phosphorylase kinas    | 0.072  | 1.051 | 5.09E-01 | 5.09E+01 |
| 8029845 | ---          | ---      | ---                                  | -0.019 | 0.987 | 9.65E-01 | 9.65E+01 |
| 8029847 | NM_00103988  | FKRP     | fukutin related protein              | -0.015 | 0.990 | 9.16E-01 | 9.16E+01 |
| 8029854 | NM_005628    | SLC1A5   | solute carrier family 1 (neutral am  | 0.042  | 1.029 | 6.81E-01 | 6.81E+01 |
| 8029856 | NM_004491    | GRLF1    | glucocorticoid receptor DNA bindi    | -0.028 | 0.981 | 8.98E-01 | 8.98E+01 |
| 8029870 | NM_002517    | NPAS1    | neuronal PAS domain protein 1        | 0.023  | 1.016 | 8.56E-01 | 8.56E+01 |
| 8029884 | NR_027280    | SAE1     | SUMO1 activating enzyme subunit      | -0.033 | 0.977 | 8.03E-01 | 8.03E+01 |
| 8029894 | NM_015603    | CCDC9    | coiled-coil domain containing 9      | -0.082 | 0.944 | 3.84E-01 | 3.84E+01 |
| 8029907 | NM_001736    | C5AR1    | complement component 5a recep        | 0.225  | 1.169 | 4.93E-01 | 4.93E+01 |
| 8029918 | NM_014681    | DHX34    | DEAH (Asp-Glu-Ala-His) box polyp     | -0.076 | 0.949 | 4.64E-01 | 4.64E+01 |
| 8029937 | ---          | ---      | ---                                  | 0.024  | 1.017 | 8.78E-01 | 8.78E+01 |
| 8029939 | NM_015711    | GLTSCR1  | glioma tumor suppressor candidat     | 0.023  | 1.016 | 8.27E-01 | 8.27E+01 |
| 8029950 | NM_014601    | EHD2     | EH-domain containing 2               | -0.027 | 0.981 | 8.13E-01 | 8.13E+01 |
| 8029958 | NM_015710    | GLTSCR2  | glioma tumor suppressor candidat     | -0.016 | 0.989 | 9.36E-01 | 9.36E+01 |
| 8029969 | NM_003009    | SEPW1    | selenoprotein W, 1                   | 0.024  | 1.017 | 9.07E-01 | 9.07E+01 |
| 8029996 | BC043386     | C19orf68 | chromosome 19 open reading fran      | -0.033 | 0.977 | 7.83E-01 | 7.83E+01 |
| 8030007 | NM_001425    | EMP3     | epithelial membrane protein 3        | 0.118  | 1.086 | 6.51E-01 | 6.51E+01 |
| 8030015 | NM_012451    | SYNGR4   | synaptogyrin 4                       | 0.012  | 1.008 | 9.44E-01 | 9.44E+01 |
| 8030022 | NM_000836    | GRIN2D   | glutamate receptor, ionotropic, N    | -0.112 | 0.925 | 2.08E-01 | 2.08E+01 |
| 8030035 | NM_031485    | GRWD1    | glutamate-rich WD repeat contain     | -0.018 | 0.987 | 9.01E-01 | 9.01E+01 |
| 8030044 | NM_170720    | KCNJ14   | potassium inwardly-rectifying cha    | 0.005  | 1.004 | 9.77E-01 | 9.77E+01 |
| 8030049 | NM_017457    | CYTH2    | cytohesin 2                          | -0.238 | 0.848 | 2.50E-02 | 2.50E+00 |
| 8030064 | NM_017457    | CYTH2    | cytohesin 2                          | -0.141 | 0.907 | 5.11E-01 | 5.11E+01 |
| 8030067 | NM_004605    | SULT2B1  | sulfotransferase family, cytosolic,  | -0.037 | 0.974 | 7.61E-01 | 7.61E+01 |
| 8030078 | NM_020126    | SPHK2    | sphingosine kinase 2                 | -0.008 | 0.994 | 9.73E-01 | 9.73E+01 |
| 8030092 | NR_004401    | SEC1     | secretory blood group 1              | -0.115 | 0.923 | 3.79E-01 | 3.79E+01 |
| 8030094 | NM_000511    | FUT2     | fucosyltransferase 2 (secretor stat  | -0.068 | 0.954 | 7.03E-01 | 7.03E+01 |
| 8030113 | NM_006666    | RUVBL2   | RuvB-like 2 (E. coli)                | -0.123 | 0.918 | 3.04E-01 | 3.04E+01 |
| 8030133 | NM_006184    | NUCB1    | nucleobindin 1                       | 0.116  | 1.084 | 3.60E-01 | 3.60E+01 |
| 8030148 | NM_014475    | DHDH     | dihydrodiol dehydrogenase (dime      | 0.018  | 1.013 | 9.23E-01 | 9.23E+01 |
| 8030158 | NR_027882    | BAX      | BCL2-associated X protein            | -0.076 | 0.949 | 4.88E-01 | 4.88E+01 |
| 8030171 | NM_000146    | FTL      | ferritin, light polypeptide          | 0.263  | 1.200 | 2.74E-01 | 2.74E+01 |
| 8030181 | NM_033378    | CGB2     | chorionic gonadotropin, beta poly    | -0.084 | 0.943 | 2.79E-01 | 2.79E+01 |
| 8030187 | NM_033043    | CGB5     | chorionic gonadotropin, beta poly    | -0.066 | 0.955 | 2.01E-01 | 2.01E+01 |
| 8030199 | NM_003089    | SNRNP70  | small nuclear ribonucleoprotein 7    | 0.000  | 1.000 | 9.99E-01 | 9.99E+01 |
| 8030212 | NM_022165    | LIN7B    | lin-7 homolog B (C. elegans)         | -0.117 | 0.922 | 4.48E-01 | 4.48E+01 |
| 8030251 | NM_017636    | TRPM4    | transient receptor potential cation  | -0.003 | 0.998 | 9.86E-01 | 9.86E+01 |
| 8030277 | NM_001774    | CD37     | CD37 molecule                        | 0.233  | 1.175 | 2.95E-02 | 2.95E+00 |
| 8030299 | NM_144688    | CCDC155  | coiled-coil domain containing 155    | -0.040 | 0.973 | 7.52E-01 | 7.52E+01 |
| 8030321 | NM_153329    | ALDH16A1 | aldehyde dehydrogenase 16 famil      | -0.053 | 0.964 | 5.36E-01 | 5.36E+01 |
| 8030339 | NM_001459    | FLT3LG   | fms-related tyrosine kinase 3 ligand | 0.055  | 1.039 | 5.20E-01 | 5.20E+01 |
| 8030351 | NM_012423    | RPL13A   | ribosomal protein L13a               | -0.035 | 0.976 | 7.85E-01 | 7.85E+01 |

|         |                                    |                                           |                                                      |        |          |          |          |  |
|---------|------------------------------------|-------------------------------------------|------------------------------------------------------|--------|----------|----------|----------|--|
| 8030360 | NR_000021                          | SNORD32A                                  | small nucleolar RNA, C/D box 32A                     | 0.153  | 1.112    | 7.31E-01 | 7.31E+01 |  |
| 8030362 | NR_000020                          | SNORD33                                   | small nucleolar RNA, C/D box 33                      | 0.092  | 1.066    | 8.05E-01 | 8.05E+01 |  |
| 8030368 | NM_001015                          | RPS11                                     | ribosomal protein S11                                | 0.010  | 1.007    | 9.36E-01 | 9.36E+01 |  |
| 8030374 | NM_004107                          | FCGR7                                     | Fc fragment of IgG, receptor, transmembrane          | 0.145  | 1.106    | 2.83E-01 | 2.83E+01 |  |
| 8030383 | NM_020650                          | RCN3                                      | reticulocalbin 3, EF-hand calcium binding domain     | 0.023  | 1.016    | 9.14E-01 | 9.14E+01 |  |
| 8030391 | ---                                | ---                                       | ---                                                  | -0.088 | 0.941    | 5.77E-01 | 5.77E+01 |  |
| 8030403 | NM_020719                          | PRR12                                     | proline rich 12                                      | -0.095 | 0.936    | 2.11E-01 | 2.11E+01 |  |
| 8030416 | NM_021228                          | SCAF1                                     | SR-related CTD-associated factor 1                   | 0.069  | 1.049    | 4.57E-01 | 4.57E+01 |  |
| 8030429 | NM_138639                          | BCL2L12                                   | BCL2-like 12 (proline rich)                          | -0.133 | 0.912    | 1.58E-01 | 1.58E+01 |  |
| 8030437 | NM_198319                          | PRMT1                                     | protein arginine methyltransferase 1                 | -0.089 | 0.940    | 5.60E-01 | 5.60E+01 |  |
| 8030470 | NM_014203                          | AP2A1                                     | adaptor-related protein complex 2                    | 0.142  | 1.103    | 4.79E-02 | 4.79E+00 |  |
| 8030498 | NM_030973                          | MED25                                     | mediator complex subunit 25                          | -0.016 | 0.989    | 8.97E-01 | 8.97E+01 |  |
| 8030525 | NM_017432                          | PTOV1                                     | prostate tumor overexpressed 1                       | 0.031  | 1.022    | 7.95E-01 | 7.95E+01 |  |
| 8030539 | NM_024682                          | TBC1D17                                   | TBC1 domain family, member 17                        | -0.075 | 0.949    | 2.93E-01 | 2.93E+01 |  |
| 8030557 | NM_012068                          | ATF5                                      | activating transcription factor 5                    | 0.159  | 1.116    | 4.04E-01 | 4.04E+01 |  |
| 8030569 | NM_015428                          | ZNF473                                    | zinc finger protein 473                              | -0.119 | 0.921    | 4.61E-01 | 4.61E+01 |  |
| 8030582 | NM_00114580                        | MYH14                                     | myosin, heavy chain 14                               | -0.008 | 0.994    | 9.46E-01 | 9.46E+01 |  |
| 8030641 | NM_002691                          | POLD1                                     | polymerase (DNA directed), delta                     | 0.036  | 1.026    | 7.73E-01 | 7.73E+01 |  |
| 8030671 | NM_003121                          | SPIB                                      | Spi-B transcription factor (Spi-1/PU.1)              | -0.015 | 0.990    | 9.29E-01 | 9.29E+01 |  |
| 8030706 | NM_175063                          | C19orf63                                  | chromosome 19 open reading frame 63                  | 0.034  | 1.024    | 8.24E-01 | 8.24E+01 |  |
| 8030721 | NM_002975                          | CLEC11A                                   | C-type lectin domain family 11, member 1             | -0.012 | 0.992    | 9.49E-01 | 9.49E+01 |  |
| 8030736 | NM_033068                          | ACPT                                      | acid phosphatase, testicular                         | -0.011 | 0.993    | 9.49E-01 | 9.49E+01 |  |
| 8030749 | ENST00000326                       | MGC45922                                  | hypothetical LOC284365                               | 0.015  | 1.011    | 9.52E-01 | 9.52E+01 |  |
| 8030753 | NM_00103004                        | KLK3                                      | kallikrein-related peptidase 3                       | -0.013 | 0.991    | 9.22E-01 | 9.22E+01 |  |
| 8030768 | NM_00100223                        | KLK2                                      | kallikrein-related peptidase 2                       | -0.013 | 0.991    | 9.38E-01 | 9.38E+01 |  |
| 8030782 | NM_014441                          | SIGLEC9                                   | sialic acid binding Ig-like lectin 9                 | 0.058  | 1.041    | 8.32E-01 | 8.32E+01 |  |
| 8030789 | NM_014385                          | SIGLEC7                                   | sialic acid binding Ig-like lectin 7                 | 0.008  | 1.005    | 9.77E-01 | 9.77E+01 |  |
| 8030804 | NM_001772                          | CD33                                      | CD33 molecule                                        | 0.112  | 1.081    | 3.12E-01 | 3.12E+01 |  |
| 8030831 | NM_007147                          | ZNF175                                    | zinc finger protein 175                              | -0.031 | 0.979    | 8.81E-01 | 8.81E+01 |  |
| 8030838 | ENST00000301                       | FLJ30403                                  | hypothetical protein LOC729975                       | -0.101 | 0.933    | 4.71E-01 | 4.71E+01 |  |
| 8030842 | ---                                | ---                                       | ---                                                  | 0.028  | 1.020    | 8.96E-01 | 8.96E+01 |  |
| 8030848 | NR_024330                          | NCRNA00085                                | non-protein coding RNA 85                            | -0.089 | 0.940    | 3.39E-01 | 3.39E+01 |  |
| 8030860 | NM_001462                          | FPR2                                      | formyl peptide receptor 2                            | 0.343  | 1.269    | 6.54E-01 | 6.54E+01 |  |
| 8030881 | NM_014225                          | PPP2R1A                                   | protein phosphatase 2 (formerly 2A)                  | -0.041 | 0.972    | 6.66E-01 | 6.66E+01 |  |
| 8030899 | NM_00101085                        | ZNF766                                    | zinc finger protein 766                              | 0.126  | 1.091    | 3.00E-01 | 3.00E+01 |  |
| 8030908 | NM_144684                          | ZNF480                                    | zinc finger protein 480                              | -0.048 | 0.967    | 8.16E-01 | 8.16E+01 |  |
| 8030925 | NM_00114543                        | LOC400713                                 | zinc finger protein LOC400713                        | 0.044  | 1.031    | 8.89E-01 | 8.89E+01 |  |
| 8030931 | NM_032423                          | ZNF528                                    | zinc finger protein 528                              | 0.101  | 1.073    | 7.38E-01 | 7.38E+01 |  |
| 8030946 | NM_00103988                        | ZNF808                                    | zinc finger protein 808                              | 0.167  | 1.122    | 1.30E-01 | 1.30E+01 |  |
| 8030974 | ENST00000338                       | LOC646508                                 | hypothetical LOC646508                               | -0.120 | 0.920    | 3.82E-01 | 3.82E+01 |  |
| 8030978 | NM_138374                          | ZNF845                                    | zinc finger protein 845                              | 0.124  | 1.090    | 6.42E-01 | 6.42E+01 |  |
| 8030980 | NR_003699                          | ZNF525                                    | zinc finger protein 525                              | 0.045  | 1.031    | 8.07E-01 | 8.07E+01 |  |
| 8030982 | NM_00104018                        | ZNF765                                    | zinc finger protein 765                              | 0.012  | 1.008    | 9.33E-01 | 9.33E+01 |  |
| 8030991 | NR_003148 // #7804 // LOC100287543 | tropomyosin 3 pseudogene // tropomyosin 3 | 0.016                                                | 1.011  | 9.05E-01 | 9.05E+01 |          |  |
| 8030993 | NM_00100840                        | ZNF761                                    | zinc finger protein 761                              | 0.123  | 1.089    | 5.32E-01 | 5.32E+01 |  |
| 8030999 | NM_018555                          | ZNF331                                    | zinc finger protein 331                              | -0.095 | 0.936    | 5.74E-01 | 5.74E+01 |  |
| 8031011 | ---                                | ---                                       | ---                                                  | -0.035 | 0.976    | 7.94E-01 | 7.94E+01 |  |
| 8031047 | NM_00102081                        | MYADM                                     | myeloid-associated differentiation factor            | -0.097 | 0.935    | 6.42E-01 | 6.42E+01 |  |
| 8031076 | NM_031896                          | CACNG7                                    | calcium channel, voltage-dependent, R-type, 7        | -0.003 | 0.998    | 9.87E-01 | 9.87E+01 |  |
| 8031084 | NM_031895                          | CACNG8                                    | calcium channel, voltage-dependent, R-type, 8        | 0.014  | 1.010    | 9.12E-01 | 9.12E+01 |  |
| 8031090 | NM_145814                          | CACNG6                                    | calcium channel, voltage-dependent, R-type, 6        | -0.051 | 0.966    | 5.98E-01 | 5.98E+01 |  |
| 8031097 | NM_004542                          | NDUFA3                                    | NADH dehydrogenase (ubiquinone) complex 1, subunit 3 | 0.037  | 1.026    | 7.97E-01 | 7.97E+01 |  |
| 8031102 | NM_015629                          | PRPF31                                    | PRP31 pre-mRNA processing factor                     | -0.036 | 0.975    | 8.32E-01 | 8.32E+01 |  |
| 8031122 | NM_014516                          | CNOT3                                     | CCR4-NOT transcription complex, subunit 3            | -0.020 | 0.986    | 8.76E-01 | 8.76E+01 |  |
| 8031145 | NM_024075                          | TSEN34                                    | tRNA splicing endonuclease 34 homolog                | -0.068 | 0.954    | 6.05E-01 | 6.05E+01 |  |
| 8031152 | NM_001013                          | RPS9                                      | ribosomal protein S9                                 | -0.006 | 0.996    | 9.85E-01 | 9.85E+01 |  |
| 8031157 | NM_020659                          | TTYH1                                     | tearless homolog 1 (Drosophila)                      | -0.041 | 0.972    | 6.00E-01 | 6.00E+01 |  |
| 8031176 | NM_052925                          | LENG8                                     | leukocyte receptor cluster (LRC) member 8            | -0.029 | 0.980    | 8.25E-01 | 8.25E+01 |  |
| 8031196 | NM_002288                          | LAIR2                                     | leukocyte-associated immunoglobulin-like receptor 2  | -0.072 | 0.951    | 6.38E-01 | 6.38E+01 |  |
| 8031207 | NM_00113091                        | LILRA2                                    | leukocyte immunoglobulin-like receptor A2            | -0.026 | 0.982    | 9.54E-01 | 9.54E+01 |  |
| 8031213 | NM_006863                          | LILRA1                                    | leukocyte immunoglobulin-like receptor A1            | 0.283  | 1.217    | 2.08E-01 | 2.08E+01 |  |
| 8031223 | NM_006669                          | LILRB1                                    | leukocyte immunoglobulin-like receptor B1            | 0.308  | 1.238    | 1.27E-01 | 1.27E+01 |  |
| 8031253 | NR_003061                          | LILRP2                                    | leukocyte immunoglobulin-like receptor P2            | 0.046  | 1.032    | 7.57E-01 | 7.57E+01 |  |
| 8031260 | NM_153443                          | KIR3DL3                                   | killer cell immunoglobulin-like receptor 3DL3        | 0.034  | 1.024    | 8.87E-01 | 8.87E+01 |  |
| 8031277 | NM_015868                          | KIR2DL3                                   | killer cell immunoglobulin-like receptor 2DL3        | 0.071  | 1.051    | 8.76E-01 | 8.76E+01 |  |
| 8031293 | NM_014511                          | KIR2DL3                                   | killer cell immunoglobulin-like receptor 2DL3        | 0.171  | 1.126    | 7.90E-01 | 7.90E+01 |  |
| 8031297 | NM_014218                          | KIR2DL1                                   | killer cell immunoglobulin-like receptor 2DL1        | 0.111  | 1.080    | 7.92E-01 | 7.92E+01 |  |
| 8031311 | NM_013289                          | KIR3DL1                                   | killer cell immunoglobulin-like receptor 3DL1        | 0.007  | 1.005    | 9.85E-01 | 9.85E+01 |  |
| 8031328 | NM_006737                          | KIR3DL2                                   | killer cell immunoglobulin-like receptor 3DL2        | 0.015  | 1.010    | 9.65E-01 | 9.65E+01 |  |
| 8031344 | AY366242                           | KIR2DL2                                   | killer cell immunoglobulin-like receptor 2DL2        | 0.008  | 1.005    | 9.85E-01 | 9.85E+01 |  |
| 8031346 | NM_002255                          | KIR2DL4                                   | killer cell immunoglobulin-like receptor 2DL4        | 0.086  | 1.061    | 7.57E-01 | 7.57E+01 |  |
| 8031358 | NM_012314                          | KIR2DS4                                   | killer cell immunoglobulin-like receptor 2DS4        | 0.100  | 1.072    | 8.04E-01 | 8.04E+01 |  |
| 8031387 | NM_004829                          | NCR1                                      | natural cytotoxicity triggering receptor 1           | 0.021  | 1.015    | 9.32E-01 | 9.32E+01 |  |
| 8031441 | NM_032430                          | BRSK1                                     | BR serine/threonine kinase 1                         | -0.075 | 0.950    | 3.15E-01 | 3.15E+01 |  |
| 8031466 | NM_032701                          | SUV420H2                                  | suppressor of variegation 4-20 homolog 2             | 0.015  | 1.010    | 9.09E-01 | 9.09E+01 |  |
| 8031475 | NM_139172                          | TMEM190                                   | transmembrane protein 190                            | -0.004 | 0.997    | 9.82E-01 | 9.82E+01 |  |
| 8031483 | NM_00113613                        | RPL28                                     | ribosomal protein L28                                | -0.074 | 0.950    | 6.30E-01 | 6.30E+01 |  |

|         |              |              |                                      |        |       |          |          |  |
|---------|--------------|--------------|--------------------------------------|--------|-------|----------|----------|--|
| 8031489 | NM_033113    | ZNF628       | zinc finger protein 628              | -0.039 | 0.973 | 7.03E-01 | 7.03E+01 |  |
| 8031495 | NM_020378    | NAT14        | N-acetyltransferase 14 (GCN5-rela    | -0.059 | 0.960 | 6.62E-01 | 6.62E+01 |  |
| 8031499 | AF086519     | LOC284297    | hypothetical LOC284297               | -0.023 | 0.984 | 8.20E-01 | 8.20E+01 |  |
| 8031511 | NM_153219    | ZNF524       | zinc finger protein 524              | 0.008  | 1.006 | 9.61E-01 | 9.61E+01 |  |
| 8031514 | XM_001718400 | LOC100133142 | similar to zinc finger protein 208   | 0.018  | 1.013 | 9.60E-01 | 9.60E+01 |  |
| 8031516 | NM_016202    | ZNF580       | zinc finger protein 580              | -0.064 | 0.957 | 4.91E-01 | 4.91E+01 |  |
| 8031522 | NM_016535    | ZNF581       | zinc finger protein 581              | -0.039 | 0.973 | 6.86E-01 | 6.86E+01 |  |
| 8031526 | NM_013301    | CCDC106      | coiled-coil domain containing 106    | -0.031 | 0.979 | 7.99E-01 | 7.99E+01 |  |
| 8031536 | NM_007279    | U2AF2        | U2 small nuclear RNA auxiliary fac   | -0.061 | 0.958 | 5.74E-01 | 5.74E+01 |  |
| 8031550 | NM_00113007  | EPN1         | epsin 1                              | -0.025 | 0.983 | 8.65E-01 | 8.65E+01 |  |
| 8031568 | ---          | ---          | ---                                  | -0.001 | 0.999 | 9.96E-01 | 9.96E+01 |  |
| 8031617 | NM_018337    | ZNF444       | zinc finger protein 444              | -0.004 | 0.997 | 9.82E-01 | 9.82E+01 |  |
| 8031622 | NM_033106    | GALP         | galanin-like peptide                 | -0.024 | 0.984 | 9.08E-01 | 9.08E+01 |  |
| 8031629 | ENST00000376 | ZSCAN5C      | zinc finger and SCAN domain cont     | 0.047  | 1.033 | 8.49E-01 | 8.49E+01 |  |
| 8031640 | NM_152478    | ZNF583       | zinc finger protein 583              | -0.025 | 0.983 | 9.28E-01 | 9.28E+01 |  |
| 8031646 | AK302988     | LOC100288114 | hypothetical protein LOC1002881      | -0.132 | 0.912 | 8.08E-01 | 8.08E+01 |  |
| 8031659 | NM_020828    | ZFP28        | zinc finger protein 28 homolog (m    | 0.014  | 1.009 | 9.56E-01 | 9.56E+01 |  |
| 8031669 | NM_00100166  | ZNF470       | zinc finger protein 470              | -0.013 | 0.991 | 9.65E-01 | 9.65E+01 |  |
| 8031675 | NM_021216    | ZNF71        | zinc finger protein 71               | 0.035  | 1.024 | 7.51E-01 | 7.51E+01 |  |
| 8031690 | NM_003417    | ZNF264       | zinc finger protein 264              | -0.006 | 0.996 | 9.75E-01 | 9.75E+01 |  |
| 8031700 | NM_00101587  | AURKC        | aurora kinase C                      | -0.019 | 0.987 | 8.78E-01 | 8.78E+01 |  |
| 8031714 | NM_006635    | ZNF460       | zinc finger protein 460              | -0.061 | 0.959 | 7.49E-01 | 7.49E+01 |  |
| 8031720 | NM_213598    | ZNF543       | zinc finger protein 543              | -0.023 | 0.984 | 9.35E-01 | 9.35E+01 |  |
| 8031726 | NM_020657    | ZNF304       | zinc finger protein 304              | -0.159 | 0.895 | 4.51E-01 | 4.51E+01 |  |
| 8031732 | NM_173631    | ZNF547       | zinc finger protein 547              | 0.016  | 1.011 | 9.53E-01 | 9.53E+01 |  |
| 8031737 | NM_152909    | ZNF548       | zinc finger protein 548              | -0.035 | 0.976 | 8.67E-01 | 8.67E+01 |  |
| 8031744 | NM_006959    | ZNF17        | zinc finger protein 17               | 0.110  | 1.080 | 3.07E-01 | 3.07E+01 |  |
| 8031750 | NM_00109849  | ZNF419       | zinc finger protein 419              | -0.033 | 0.978 | 8.13E-01 | 8.13E+01 |  |
| 8031759 | NM_198542    | ZNF773       | zinc finger protein 773              | -0.036 | 0.975 | 8.55E-01 | 8.55E+01 |  |
| 8031768 | NM_00101087  | ZIK1         | zinc finger protein interacting with | 0.013  | 1.009 | 9.54E-01 | 9.54E+01 |  |
| 8031778 | NM_020880    | ZNF530       | zinc finger protein 530              | -0.066 | 0.955 | 5.33E-01 | 5.33E+01 |  |
| 8031784 | NM_003435    | ZNF134       | zinc finger protein 134              | -0.033 | 0.977 | 8.93E-01 | 8.93E+01 |  |
| 8031792 | NM_006385    | ZNF211       | zinc finger protein 211              | -0.087 | 0.941 | 6.95E-01 | 6.95E+01 |  |
| 8031807 | NM_138347    | ZNF551       | zinc finger protein 551              | 0.016  | 1.011 | 9.53E-01 | 9.53E+01 |  |
| 8031815 | NM_173632    | ZNF776       | zinc finger protein 776              | -0.019 | 0.987 | 9.37E-01 | 9.37E+01 |  |
| 8031821 | NM_017652    | ZNF586       | zinc finger protein 586              | -0.043 | 0.970 | 7.70E-01 | 7.70E+01 |  |
| 8031825 | AK299091     | LOC100288322 | similar to zinc finger protein 587   | 0.099  | 1.071 | 6.88E-01 | 6.88E+01 |  |
| 8031827 | NM_032828    | ZNF587       | zinc finger protein 587              | 0.097  | 1.069 | 4.06E-01 | 4.06E+01 |  |
| 8031837 | AF294842     | ZNF587       | zinc finger protein 587              | -0.013 | 0.991 | 9.73E-01 | 9.73E+01 |  |
| 8031843 | NM_025027    | ZNF606       | zinc finger protein 606              | -0.032 | 0.978 | 8.82E-01 | 8.82E+01 |  |
| 8031847 | NM_182572    | ZSCAN1       | zinc finger and SCAN domain cont     | -0.056 | 0.962 | 4.44E-01 | 4.44E+01 |  |
| 8031857 | NM_003436    | ZNF135       | zinc finger protein 135              | -0.111 | 0.926 | 3.26E-01 | 3.26E+01 |  |
| 8031865 | ---          | ---          | ---                                  | -0.025 | 0.983 | 8.54E-01 | 8.54E+01 |  |
| 8031867 | ---          | ---          | ---                                  | 0.111  | 1.080 | 6.70E-01 | 6.70E+01 |  |
| 8031871 | NM_133502    | ZNF274       | zinc finger protein 274              | -0.005 | 0.996 | 9.74E-01 | 9.74E+01 |  |
| 8031884 | NM_014480    | ZNF544       | zinc finger protein 544              | -0.038 | 0.974 | 8.33E-01 | 8.33E+01 |  |
| 8031893 | NM_021089    | ZNF8         | zinc finger protein 8                | -0.079 | 0.947 | 4.36E-01 | 4.36E+01 |  |
| 8031899 | ---          | ---          | ---                                  | -0.001 | 0.999 | 9.97E-01 | 9.97E+01 |  |
| 8031908 | NM_181846    | ZSCAN22      | zinc finger and SCAN domain cont     | -0.066 | 0.955 | 5.15E-01 | 5.15E+01 |  |
| 8031913 | NM_005762    | TRIM28       | tripartite motif-containing 28       | 0.005  | 1.003 | 9.81E-01 | 9.81E+01 |  |
| 8031931 | ---          | ---          | ---                                  | 0.009  | 1.006 | 9.82E-01 | 9.82E+01 |  |
| 8031933 | NM_001009    | RPS5         | ribosomal protein S5                 | -0.034 | 0.977 | 9.11E-01 | 9.11E+01 |  |
| 8031939 | NM_173548    | ZNF584       | zinc finger protein 584              | -0.060 | 0.959 | 7.15E-01 | 7.15E+01 |  |
| 8031949 | NM_207395    | ZNF324B      | zinc finger protein 324B             | -0.070 | 0.953 | 3.40E-01 | 3.40E+01 |  |
| 8031956 | NM_014347    | ZNF324       | zinc finger protein 324              | -0.030 | 0.979 | 8.88E-01 | 8.88E+01 |  |
| 8031962 | NM_017908    | ZNF446       | zinc finger protein 446              | -0.110 | 0.926 | 4.14E-02 | 4.14E+00 |  |
| 8031973 | NR_026052    | MGC2752      | hypothetical LOC65996                | 0.017  | 1.012 | 9.29E-01 | 9.29E+01 |  |
| 8031981 | NR_003659    | WASH3P       | WAS protein family homolog 3 pse     | 0.029  | 1.020 | 8.79E-01 | 8.79E+01 |  |
| 8031990 | NM_207366    | 40435        | septin 14                            | -0.030 | 0.979 | 9.19E-01 | 9.19E+01 |  |
| 8031992 | NR_024368    | tcag7.907    | hypothetical LOC402483               | -0.025 | 0.983 | 7.64E-01 | 7.64E+01 |  |
| 8031997 | ---          | ---          | ---                                  | 0.267  | 1.203 | 4.25E-01 | 4.25E+01 |  |
| 8031999 | NM_003712    | PPAP2C       | phosphatidic acid phosphatase ty     | -0.065 | 0.956 | 5.31E-01 | 5.31E+01 |  |
| 8032009 | NM_017550    | MIER2        | mesoderm induction early respon      | 0.039  | 1.027 | 7.82E-01 | 7.82E+01 |  |
| 8032034 | NM_00113626  | FAM148C      | family with sequence similarity 14   | -0.023 | 0.984 | 8.88E-01 | 8.88E+01 |  |
| 8032037 | NM_012435    | SHC2         | SHC (Src homology 2 domain cont      | -0.060 | 0.959 | 4.97E-01 | 4.97E+01 |  |
| 8032051 | NM_182577    | ODF3L2       | outer dense fiber of sperm tails 3-  | -0.015 | 0.990 | 9.27E-01 | 9.27E+01 |  |
| 8032057 | NM_005035    | POLRMT       | polymerase (RNA) mitochondrial (     | -0.005 | 0.996 | 9.77E-01 | 9.77E+01 |  |
| 8032070 | ENST00000358 | FLJ45684     | locus                                | -0.054 | 0.963 | 7.52E-01 | 7.52E+01 |  |
| 8032076 | NM_194460    | RNF126       | ring finger protein 126              | -0.063 | 0.957 | 5.99E-01 | 5.99E+01 |  |
| 8032088 | NM_214710    | PRSSL1       | protease, serine-like 1              | -0.034 | 0.977 | 6.99E-01 | 6.99E+01 |  |
| 8032094 | NM_024888    | PRG2         | plasticity-related gene 2            | -0.124 | 0.918 | 1.95E-01 | 1.95E+01 |  |
| 8032106 | NM_005481    | MED16        | mediator complex subunit 16          | 0.035  | 1.024 | 7.57E-01 | 7.57E+01 |  |
| 8032127 | NM_138774    | C19orf22     | chromosome 19 open reading fram      | 0.019  | 1.013 | 9.07E-01 | 9.07E+01 |  |
| 8032137 | NM_00103302  | C19orf6      | chromosome 19 open reading fram      | -0.013 | 0.991 | 9.41E-01 | 9.41E+01 |  |
| 8032149 | NM_002695    | POLR2E       | polymerase (RNA) II (DNA directe     | -0.013 | 0.991 | 9.49E-01 | 9.49E+01 |  |
| 8032157 | NM_014963    | SBN02        | strawberry notch homolog 2 (Dros     | -0.060 | 0.959 | 4.88E-01 | 4.88E+01 |  |
| 8032197 | NM_152769    | C19orf26     | chromosome 19 open reading fram      | -0.066 | 0.955 | 5.20E-01 | 5.20E+01 |  |

|         |             |           |                                                                  |        |       |          |          |  |
|---------|-------------|-----------|------------------------------------------------------------------|--------|-------|----------|----------|--|
| 8032212 | AK127759    | NDUFS7    | NADH dehydrogenase (ubiquinone)                                  | -0.077 | 0.948 | 5.15E-01 | 5.15E+01 |  |
| 8032214 | NM_000156   | GAMT      | guanidinoacetate N-methyltransferase                             | -0.031 | 0.979 | 8.17E-01 | 8.17E+01 |  |
| 8032224 | NM_152482   | C19orf25  | chromosome 19 open reading frame                                 | -0.056 | 0.962 | 6.19E-01 | 6.19E+01 |  |
| 8032232 | NM_017573   | PCSK4     | proprotein convertase subtilisin/kexin type 4                    | -0.076 | 0.949 | 3.54E-01 | 3.54E+01 |  |
| 8032249 | NM_213604   | ADAMTSL5  | ADAMTS-like 5                                                    | -0.095 | 0.936 | 4.13E-01 | 4.13E+01 |  |
| 8032265 | NM_203304   | MEX3D     | mex-3 homolog D (C. elegans)                                     | 0.002  | 1.001 | 9.91E-01 | 9.91E+01 |  |
| 8032275 | NM_003926   | MBD3      | methyl-CpG binding domain protein 3                              | -0.041 | 0.972 | 7.64E-01 | 7.64E+01 |  |
| 8032284 | NM_006830   | UQCR      | ubiquinol-cytochrome c reductase complex                         | -0.093 | 0.937 | 5.97E-01 | 5.97E+01 |  |
| 8032290 | NM_003200   | TCF3      | transcription factor 3 (E2A immunoglobulin-like)                 | 0.047  | 1.033 | 6.82E-01 | 6.82E+01 |  |
| 8032312 | NM_138813   | ATP8B3    | ATPase, class I, type 8B, member 3                               | -0.014 | 0.990 | 9.19E-01 | 9.19E+01 |  |
| 8032347 | NM_020695   | REXO1     | REX1, RNA exonuclease 1 homolog                                  | 0.010  | 1.007 | 9.54E-01 | 9.54E+01 |  |
| 8032365 | NM_031918   | KLF16     | Kruppel-like factor 16                                           | -0.045 | 0.969 | 6.14E-01 | 6.14E+01 |  |
| 8032371 | NM_031213   | FAM108A1  | family with sequence similarity 10, member A1                    | 0.044  | 1.031 | 8.39E-01 | 8.39E+01 |  |
| 8032375 | NM_152771   | C19orf34  | chromosome 19 open reading frame                                 | -0.056 | 0.962 | 5.29E-01 | 5.29E+01 |  |
| 8032380 | NM_017797   | BTBD2     | BTB (POZ) domain containing 2                                    | -0.042 | 0.971 | 7.14E-01 | 7.14E+01 |  |
| 8032392 | NM_199054   | MKNK2     | MAP kinase interacting serine/threonine kinase                   | -0.060 | 0.959 | 6.54E-01 | 6.54E+01 |  |
| 8032410 | NM_130807   | MOBK12A   | MOB1, Mps One Binder kinase activator                            | 0.029  | 1.021 | 8.07E-01 | 8.07E+01 |  |
| 8032418 | NM_003938   | AP3D1     | adaptor-related protein complex 3                                | 0.061  | 1.043 | 6.25E-01 | 6.25E+01 |  |
| 8032455 | NM_018049   | PLEKHJ1   | pleckstrin homology domain containing 1                          | -0.022 | 0.985 | 8.64E-01 | 8.64E+01 |  |
| 8032465 | NM_144616   | JSRP1     | junctional sarcoplasmic reticulum protein                        | 0.013  | 1.009 | 9.16E-01 | 9.16E+01 |  |
| 8032473 | NM_198532   | C19orf35  | chromosome 19 open reading frame                                 | -0.040 | 0.973 | 7.47E-01 | 7.47E+01 |  |
| 8032478 | NM_00110139 | LINGO3    | leucine rich repeat and Ig domain containing 3                   | -0.045 | 0.969 | 7.67E-01 | 7.67E+01 |  |
| 8032480 | NM_016199   | LSM7      | LSM7 homolog, U6 small nuclear ribonucleoprotein                 | 0.037  | 1.026 | 8.77E-01 | 8.77E+01 |  |
| 8032484 | NM_012458   | TIMM13    | translocase of inner mitochondrial membrane                      | 0.114  | 1.082 | 4.25E-01 | 4.25E+01 |  |
| 8032491 | NM_032737   | LMNB2     | lamin B2                                                         | -0.044 | 0.970 | 7.03E-01 | 7.03E+01 |  |
| 8032509 | NM_052847   | GNNG7     | guanine nucleotide binding protein gamma                         | 0.129  | 1.094 | 3.48E-01 | 3.48E+01 |  |
| 8032518 | NM_145173   | DIRAS1    | DIRAS family, GTP-binding RAS-like                               | -0.045 | 0.970 | 6.61E-01 | 6.61E+01 |  |
| 8032525 | NM_213568   | SLC39A3   | solute carrier family 39 (zinc transporters)                     | -0.087 | 0.942 | 4.04E-01 | 4.04E+01 |  |
| 8032530 | NM_003021   | SGTA      | small glutamine-rich tetratricopeptide repeat                    | 0.002  | 1.001 | 9.92E-01 | 9.92E+01 |  |
| 8032544 | NM_021217   | ZNF77     | zinc finger protein 77                                           | -0.026 | 0.982 | 9.01E-01 | 9.01E+01 |  |
| 8032553 | NM_003260   | TLE2      | transducin-like enhancer of split 2                              | -0.010 | 0.993 | 9.50E-01 | 9.50E+01 |  |
| 8032576 | NM_198969   | AES       | amino-terminal enhancer of split                                 | -0.010 | 0.993 | 9.77E-01 | 9.77E+01 |  |
| 8032588 | NM_00113650 | LOC284422 | similar to HSPC323                                               | -0.003 | 0.998 | 9.88E-01 | 9.88E+01 |  |
| 8032595 | NM_031304   | DOHH      | deoxyhypusine hydroxylase/monooxygenase                          | -0.076 | 0.949 | 3.62E-01 | 3.62E+01 |  |
| 8032601 | NM_032753   | RAX2      | retina and anterior neural fold homeobox 2                       | -0.059 | 0.960 | 6.06E-01 | 6.06E+01 |  |
| 8032608 | NM_174983   | C19orf28  | chromosome 19 open reading frame                                 | -0.005 | 0.996 | 9.75E-01 | 9.75E+01 |  |
| 8032623 | NM_001060   | TBXA2R    | thromboxane A2 receptor                                          | -0.023 | 0.984 | 9.00E-01 | 9.00E+01 |  |
| 8032637 | NM_00108054 | C19orf29  | chromosome 19 open reading frame                                 | -0.002 | 0.999 | 9.92E-01 | 9.92E+01 |  |
| 8032650 | NM_012398   | PIP5K1C   | phosphatidylinositol-4-phosphate 5-kinase class I                | -0.028 | 0.981 | 8.08E-01 | 8.08E+01 |  |
| 8032682 | NM_139355   | MATK      | megakaryocyte-associated tyrosine kinase                         | 0.017  | 1.012 | 9.02E-01 | 9.02E+01 |  |
| 8032699 | NM_015174   | ZFR2      | zinc finger RNA binding protein 2                                | -0.083 | 0.944 | 2.40E-01 | 2.40E+01 |  |
| 8032718 | NM_001348   | DAPK3     | death-associated protein kinase 3                                | -0.053 | 0.964 | 7.03E-01 | 7.03E+01 |  |
| 8032730 | NM_001961   | EEF2      | eukaryotic translation elongation factor 2                       | -0.083 | 0.944 | 5.92E-01 | 5.92E+01 |  |
| 8032751 | ---         | ---       | ---                                                              | -0.025 | 0.983 | 8.83E-01 | 8.83E+01 |  |
| 8032755 | NM_015898   | ZBTB7A    | zinc finger and BTB domain containing 7A                         | -0.067 | 0.955 | 5.23E-01 | 5.23E+01 |  |
| 8032761 | NM_030662   | MAP2K2    | mitogen-activated protein kinase 2                               | -0.133 | 0.912 | 1.81E-01 | 1.81E+01 |  |
| 8032770 | NM_016539   | SIRT6     | sirtuin (silent mating type information 2) domain containing 6   | -0.006 | 0.996 | 9.67E-01 | 9.67E+01 |  |
| 8032782 | NM_144615   | TMIGD2    | transmembrane and immunoglobulin domain containing 2             | -0.020 | 0.986 | 9.00E-01 | 9.00E+01 |  |
| 8032804 | NM_003025   | SH3GL1    | SH3-domain GRB2-like 1                                           | -0.044 | 0.970 | 7.40E-01 | 7.40E+01 |  |
| 8032815 | NM_025241   | UBXN6     | UBX domain protein 6                                             | -0.022 | 0.985 | 8.86E-01 | 8.86E+01 |  |
| 8032829 | NM_00108040 | PLIN4     | perilipin 4                                                      | -0.094 | 0.937 | 2.47E-01 | 2.47E+01 |  |
| 8032834 | NM_052972   | LRG1      | leucine-rich alpha-2-glycoprotein 1                              | -0.010 | 0.993 | 9.56E-01 | 9.56E+01 |  |
| 8032839 | NM_032108   | SEMA6B    | sema domain, transmembrane domain containing 6B                  | -0.010 | 0.993 | 9.64E-01 | 9.64E+01 |  |
| 8032863 | NM_019107   | C19orf10  | chromosome 19 open reading frame                                 | 0.041  | 1.029 | 8.16E-01 | 8.16E+01 |  |
| 8032871 | NM_139159   | DPP9      | dipeptidyl-peptidase 9                                           | -0.055 | 0.962 | 7.72E-01 | 7.72E+01 |  |
| 8032899 | NM_182919   | TICAM1    | tolll-like receptor adaptor molecule 1                           | -0.050 | 0.966 | 6.43E-01 | 6.43E+01 |  |
| 8032909 | NM_005817   | PLIN3     | perilipin 3                                                      | -0.030 | 0.980 | 8.79E-01 | 8.79E+01 |  |
| 8032922 | BC137009    | C19orf31  | chromosome 19 open reading frame                                 | -0.028 | 0.980 | 8.01E-01 | 8.01E+01 |  |
| 8032926 | NM_002850   | PTPRS     | protein tyrosine phosphatase, receptor type                      | -0.040 | 0.973 | 7.09E-01 | 7.09E+01 |  |
| 8032972 | ---         | ---       | ---                                                              | 0.047  | 1.033 | 7.52E-01 | 7.52E+01 |  |
| 8032974 | NM_014649   | SAFB2     | scaffold attachment factor B2                                    | -0.068 | 0.954 | 5.53E-01 | 5.53E+01 |  |
| 8032996 | NM_205767   | C19orf70  | chromosome 19 open reading frame                                 | 0.008  | 1.006 | 9.62E-01 | 9.62E+01 |  |
| 8033002 | NM_004793   | LONP1     | lon peptidase 1, mitochondrial                                   | -0.042 | 0.971 | 8.26E-01 | 8.26E+01 |  |
| 8033023 | NM_00113431 | PRR22     | proline rich 22                                                  | -0.057 | 0.961 | 5.10E-01 | 5.10E+01 |  |
| 8033025 | NM_020175   | DUS3L     | dihydrouridine synthase 3-like (S. cerevisiae)                   | -0.050 | 0.966 | 7.04E-01 | 7.04E+01 |  |
| 8033043 | NM_000150   | FUT6      | fucosyltransferase 6 (alpha (1,3) fucosyltransferase)            | -0.030 | 0.980 | 7.97E-01 | 7.97E+01 |  |
| 8033064 | NM_002034   | FUT5      | fucosyltransferase 5 (alpha (1,3) fucosyltransferase)            | -0.037 | 0.975 | 8.27E-01 | 8.27E+01 |  |
| 8033069 | NM_175614   | NDUFA11   | NADH dehydrogenase (ubiquinone) complex I                        | 0.032  | 1.022 | 8.47E-01 | 8.47E+01 |  |
| 8033075 | NM_003624   | RANBP3    | RAN binding protein 3                                            | -0.087 | 0.941 | 4.51E-01 | 4.51E+01 |  |
| 8033097 | NM_000635   | RFX2      | regulatory factor X, 2 (influences histone deacetylase activity) | -0.018 | 0.987 | 9.04E-01 | 9.04E+01 |  |
| 8033118 | NM_005934   | MLLT1     | myeloid/lymphoid or mixed-lineage leukemia 1                     | -0.055 | 0.963 | 4.96E-01 | 4.96E+01 |  |
| 8033135 | NM_002096   | GTF2F1    | general transcription factor IIF, polypeptide 1                  | -0.058 | 0.960 | 6.87E-01 | 6.87E+01 |  |
| 8033159 | NM_004158   | PSPN      | persephin                                                        | -0.019 | 0.987 | 9.06E-01 | 9.06E+01 |  |
| 8033162 | NM_003685   | KHSRP     | KH-type splicing regulatory protein                              | -0.048 | 0.967 | 7.12E-01 | 7.12E+01 |  |
| 8033179 | NM_173637   | SLC25A41  | solute carrier family 25, member 41                              | 0.005  | 1.003 | 9.78E-01 | 9.78E+01 |  |
| 8033190 | NM_024103   | SLC25A23  | solute carrier family 25 (mitochondrial)                         | 0.038  | 1.026 | 7.28E-01 | 7.28E+01 |  |
| 8033207 | NM_024898   | DENND1C   | DENN/MADD domain containing 1                                    | -0.080 | 0.946 | 4.28E-01 | 4.28E+01 |  |

|         |              |           |                                                             |        |       |          |          |
|---------|--------------|-----------|-------------------------------------------------------------|--------|-------|----------|----------|
| 8033233 | NM_006087    | TUBB4     | tubulin, beta 4                                             | -0.074 | 0.950 | 7.65E-01 | 7.65E+01 |
| 8033241 | NM_001252    | CD70      | CD70 molecule                                               | -0.036 | 0.975 | 8.05E-01 | 8.05E+01 |
| 8033248 | NM_003807    | TNFSF14   | tumor necrosis factor (ligand) superfamily 14               | -0.115 | 0.924 | 3.02E-01 | 3.02E+01 |
| 8033300 | NM_00108045  | GPR108    | G protein-coupled receptor 108                              | 0.025  | 1.017 | 9.24E-01 | 9.24E+01 |
| 8033319 | NM_005490    | SH2D3A    | SH2 domain containing 3A                                    | -0.125 | 0.917 | 1.41E-01 | 1.41E+01 |
| 8033330 | ---          | ---       | ---                                                         | -0.182 | 0.881 | 6.43E-01 | 6.43E+01 |
| 8033352 | NM_144614    | MBD3L2    | methyl-CpG binding domain protein 2                         | -0.053 | 0.964 | 5.60E-01 | 5.60E+01 |
| 8033356 | NM_144614    | MBD3L2    | methyl-CpG binding domain protein 2                         | -0.031 | 0.979 | 7.87E-01 | 7.87E+01 |
| 8033359 | NM_144614    | MBD3L2    | methyl-CpG binding domain protein 2                         | -0.031 | 0.979 | 7.87E-01 | 7.87E+01 |
| 8033385 | NM_080662    | PEX11G    | peroxisomal biogenesis factor 11G                           | -0.032 | 0.978 | 8.32E-01 | 8.32E+01 |
| 8033392 | NM_020196    | XAB2      | XPA binding protein 2                                       | 0.008  | 1.006 | 9.70E-01 | 9.70E+01 |
| 8033414 | NM_174895    | PCP2      | Purkinje cell protein 2                                     | -0.009 | 0.994 | 9.56E-01 | 9.56E+01 |
| 8033433 | NM_198492    | CLEC4G    | C-type lectin domain family 4, member 4                     | 0.092  | 1.066 | 1.38E-01 | 1.38E+01 |
| 8033445 | NR_026692    | CD209     | CD209 molecule                                              | 0.218  | 1.163 | 3.09E-01 | 3.09E+01 |
| 8033455 | ENST00000327 | FLJ22184  | hypothetical protein FLJ22184                               | -0.062 | 0.958 | 5.61E-01 | 5.61E+01 |
| 8033458 | NM_007260    | LYPLA2    | lysophospholipase II                                        | -0.002 | 0.999 | 9.95E-01 | 9.95E+01 |
| 8033460 | ---          | ---       | ---                                                         | 0.137  | 1.100 | 5.53E-01 | 5.53E+01 |
| 8033462 | NM_206833    | CTXN1     | cortixin 1                                                  | -0.038 | 0.974 | 7.82E-01 | 7.82E+01 |
| 8033465 | NM_006351    | TIMM44    | translocase of inner mitochondrial membrane 44              | 0.026  | 1.018 | 8.31E-01 | 8.31E+01 |
| 8033479 | NM_001419    | ELAVL1    | ELAV (embryonic lethal, abnormal vision) 1                  | -0.024 | 0.983 | 8.69E-01 | 8.69E+01 |
| 8033487 | NM_032447    | FBN3      | fibrillin 3                                                 | -0.004 | 0.997 | 9.77E-01 | 9.77E+01 |
| 8033554 | NM_016579    | CD320     | CD320 molecule                                              | -0.031 | 0.979 | 8.46E-01 | 8.46E+01 |
| 8033564 | NM_005001    | NDUFA7    | NADH dehydrogenase (ubiquinone) 1 complex subunit 7         | -0.059 | 0.960 | 6.57E-01 | 6.57E+01 |
| 8033571 | NM_198471    | KANK3     | KN motif and ankyrin repeat domain 3                        | -0.120 | 0.920 | 1.52E-01 | 1.52E+01 |
| 8033587 | NM_032152    | PRAM1     | PML-RARA regulated adaptor molecule 1                       | 0.057  | 1.040 | 6.21E-01 | 6.21E+01 |
| 8033598 | NM_032370    | ZNF414    | zinc finger protein 414                                     | -0.009 | 0.994 | 9.49E-01 | 9.49E+01 |
| 8033605 | NM_012335    | MYO1F     | myosin IF                                                   | -0.007 | 0.995 | 9.86E-01 | 9.86E+01 |
| 8033635 | NM_030957    | ADAMTS10  | ADAM metalloproteinase with thrombospondin type 1 motifs 10 | 0.029  | 1.021 | 8.05E-01 | 8.05E+01 |
| 8033662 | NM_178525    | ACTL9     | actin-like 9                                                | -0.077 | 0.948 | 3.66E-01 | 3.66E+01 |
| 8033667 | NM_144693    | ZNF558    | zinc finger protein 558                                     | -0.099 | 0.934 | 5.61E-01 | 5.61E+01 |
| 8033674 | NM_024690    | MUC16     | mucin 16, cell surface associated                           | -0.011 | 0.992 | 9.40E-01 | 9.40E+01 |
| 8033740 | NM_00100519  | OR7D4     | olfactory receptor, family 7, subfamily 4                   | -0.008 | 0.995 | 9.72E-01 | 9.72E+01 |
| 8033754 | NM_006631    | ZNF266    | zinc finger protein 266                                     | -0.008 | 0.994 | 9.81E-01 | 9.81E+01 |
| 8033780 | NM_024106    | ZNF426    | zinc finger protein 426                                     | -0.156 | 0.898 | 3.69E-01 | 3.69E+01 |
| 8033789 | NM_00100872  | ZNF121    | zinc finger protein 121                                     | 0.060  | 1.042 | 7.56E-01 | 7.56E+01 |
| 8033795 | NM_152289    | ZNF561    | zinc finger protein 561                                     | 0.038  | 1.026 | 8.22E-01 | 8.22E+01 |
| 8033801 | NM_00113003  | ZNF562    | zinc finger protein 562                                     | 0.062  | 1.044 | 7.51E-01 | 7.51E+01 |
| 8033813 | NM_017703    | FBXL12    | F-box and leucine-rich repeat protein 12                    | 0.064  | 1.046 | 6.67E-01 | 6.67E+01 |
| 8033818 | NM_058164    | OLFM2     | olfactomedin 2                                              | -0.054 | 0.963 | 5.89E-01 | 5.89E+01 |
| 8033825 | NM_015719    | COL5A3    | collagen, type V, alpha 3                                   | -0.022 | 0.985 | 7.89E-01 | 7.89E+01 |
| 8033892 | NM_031917    | ANGPTL6   | angiopoietin-like 6                                         | -0.073 | 0.951 | 4.75E-01 | 4.75E+01 |
| 8033899 | NM_003755    | EIF3G     | eukaryotic translation initiation factor 3 subunit G        | -0.010 | 0.993 | 9.50E-01 | 9.50E+01 |
| 8033912 | NM_00113082  | DNMT1     | DNA (cytosine-5-)methyltransferase 1                        | 0.228  | 1.172 | 2.25E-03 | 2.25E-01 |
| 8033956 | NM_004230    | S1PR2     | sphingosine-1-phosphate receptor 2                          | 0.038  | 1.027 | 7.52E-01 | 7.52E+01 |
| 8033960 | NM_00103173  | FDX1L     | ferredoxin 1-like                                           | -0.029 | 0.980 | 8.47E-01 | 8.47E+01 |
| 8033969 | NM_133452    | RAVER1    | ribonucleoprotein, PTB-binding 1                            | -0.029 | 0.980 | 7.85E-01 | 7.85E+01 |
| 8033987 | NM_002162    | ICAM3     | intercellular adhesion molecule 3                           | 0.128  | 1.093 | 2.38E-01 | 2.38E+01 |
| 8033996 | NM_003331    | TYK2      | tyrosine kinase 2                                           | -0.015 | 0.990 | 9.15E-01 | 9.15E+01 |
| 8034021 | NM_007065    | CDC37     | cell division cycle 37 homolog (S. cerevisiae)              | -0.109 | 0.927 | 4.35E-01 | 4.35E+01 |
| 8034034 | NM_203500    | KEAP1     | kelch-like ECH-associated protein 1                         | -0.031 | 0.979 | 8.33E-01 | 8.33E+01 |
| 8034043 | NM_030760    | S1PR5     | sphingosine-1-phosphate receptor 5                          | 0.008  | 1.006 | 9.61E-01 | 9.61E+01 |
| 8034055 | NM_023008    | KRI1      | KRI1 homolog (S. cerevisiae)                                | 0.081  | 1.058 | 5.73E-01 | 5.73E+01 |
| 8034075 | NM_001800    | CDKN2D    | cyclin-dependent kinase inhibitor 2D                        | -0.033 | 0.977 | 7.68E-01 | 7.68E+01 |
| 8034097 | NR_024333    | LOC147727 | hypothetical LOC147727                                      | -0.017 | 0.989 | 9.60E-01 | 9.60E+01 |
| 8034101 | NM_006858    | TMED1     | transmembrane emp24 protein transport domain 1              | -0.074 | 0.950 | 4.42E-01 | 4.42E+01 |
| 8034108 | NM_024029    | YIPF2     | Yip1 domain family, member 2                                | -0.003 | 0.998 | 9.85E-01 | 9.85E+01 |
| 8034130 | NM_00113619  | KANK2     | KN motif and ankyrin repeat domain 2                        | -0.101 | 0.932 | 3.28E-01 | 3.28E+01 |
| 8034151 | NM_020812    | DOCK6     | dedicator of cytokinesis 6                                  | -0.092 | 0.939 | 1.41E-01 | 1.41E+01 |
| 8034199 | NM_012466    | TSPAN16   | tetraspanin 16                                              | -0.086 | 0.942 | 6.62E-01 | 6.62E+01 |
| 8034202 | NM_004283    | RAB3D     | RAB3D, member RAS oncogene family                           | -0.032 | 0.978 | 8.26E-01 | 8.26E+01 |
| 8034210 | NM_198536    | TMEM205   | transmembrane protein 205                                   | -0.020 | 0.987 | 9.39E-01 | 9.39E+01 |
| 8034217 | NM_000121    | EPOR      | erythropoietin receptor                                     | 0.047  | 1.033 | 7.91E-01 | 7.91E+01 |
| 8034249 | NM_145045    | CCDC151   | coiled-coil domain containing 151                           | -0.070 | 0.953 | 5.15E-01 | 5.15E+01 |
| 8034263 | NM_001420    | ELAVL3    | ELAV (embryonic lethal, abnormal vision) 3                  | -0.029 | 0.980 | 8.25E-01 | 8.25E+01 |
| 8034276 | NM_138783    | ZNF653    | zinc finger protein 653                                     | -0.082 | 0.945 | 2.51E-01 | 2.51E+01 |
| 8034286 | NM_016581    | ECSIT     | ECSIT homolog (Drosophila)                                  | -0.023 | 0.984 | 8.61E-01 | 8.61E+01 |
| 8034299 | NM_032377    | ELOF1     | elongation factor 1 homolog (S. cerevisiae)                 | -0.037 | 0.974 | 8.55E-01 | 8.55E+01 |
| 8034304 | NM_00111103  | ACP5      | acid phosphatase 5, tartrate resistant                      | 0.311  | 1.241 | 6.80E-03 | 6.80E-01 |
| 8034313 | NR_002944    | HNRPA1L-2 | heterogeneous nuclear ribonucleoprotein A1-like 2           | -0.021 | 0.985 | 8.73E-01 | 8.73E+01 |
| 8034315 | NM_00108049  | ZNF823    | zinc finger protein 823                                     | 0.067  | 1.047 | 8.16E-01 | 8.16E+01 |
| 8034320 | NM_00108041  | ZNF433    | zinc finger protein 433                                     | 0.097  | 1.070 | 5.27E-01 | 5.27E+01 |
| 8034342 | AK292455     | ZNF625    | zinc finger protein 625                                     | 0.092  | 1.066 | 7.44E-01 | 7.44E+01 |
| 8034349 | NM_016264    | ZNF44     | zinc finger protein 44                                      | 0.113  | 1.081 | 6.79E-01 | 6.79E+01 |
| 8034379 | NM_030824    | ZNF442    | zinc finger protein 442                                     | 0.061  | 1.043 | 6.52E-01 | 6.52E+01 |
| 8034408 | NM_020714    | ZNF490    | zinc finger protein 490                                     | 0.158  | 1.116 | 2.30E-01 | 2.30E+01 |
| 8034416 | NM_006013    | RPL10     | ribosomal protein L10                                       | -0.046 | 0.968 | 8.06E-01 | 8.06E+01 |
| 8034420 | NM_000528    | MAN2B1    | mannosidase, alpha, class 2B, member 1                      | 0.179  | 1.132 | 2.08E-01 | 2.08E+01 |



|         |              |            |                                                   |        |       |          |          |  |  |
|---------|--------------|------------|---------------------------------------------------|--------|-------|----------|----------|--|--|
| 8034448 | NM_016145    | C19orf56   | chromosome 19 open reading frame                  | -0.050 | 0.966 | 8.03E-01 | 8.03E+01 |  |  |
| 8034454 | NM_001930    | DHPS       | deoxyhypusine synthase                            | -0.024 | 0.983 | 9.12E-01 | 9.12E+01 |  |  |
| 8034469 | NM_032301    | FBXW9      | F-box and WD repeat domain containing             | -0.020 | 0.987 | 8.84E-01 | 8.84E+01 |  |  |
| 8034482 | NM_00113619  | TNPO2      | transportin 2                                     | -0.094 | 0.937 | 2.60E-01 | 2.60E+01 |  |  |
| 8034512 | NR_002751    | SNORD41    | small nucleolar RNA, C/D box 41                   | 0.049  | 1.034 | 9.39E-01 | 9.39E+01 |  |  |
| 8034514 | NM_024038    | C19orf43   | chromosome 19 open reading frame                  | -0.014 | 0.991 | 9.29E-01 | 9.29E+01 |  |  |
| 8034521 | NM_013312    | HOOK2      | hook homolog 2 (Drosophila)                       | -0.073 | 0.950 | 5.51E-01 | 5.51E+01 |  |  |
| 8034544 | NM_005809    | PRDX2      | peroxiredoxin 2                                   | 0.032  | 1.022 | 8.03E-01 | 8.03E+01 |  |  |
| 8034565 | NM_001375    | DNASE2     | deoxyribonuclease II, lysosomal                   | 0.271  | 1.207 | 5.53E-02 | 5.53E+00 |  |  |
| 8034578 | NM_006563    | KLF1       | Kruppel-like factor 1 (erythroid)                 | 0.045  | 1.031 | 7.45E-01 | 7.45E+01 |  |  |
| 8034583 | NM_00110557  | SYCE2      | synaptonemal complex central element              | 0.051  | 1.036 | 7.57E-01 | 7.57E+01 |  |  |
| 8034589 | NM_004461    | FARSA      | phenylalanyl-tRNA synthetase, alpha               | -0.004 | 0.997 | 9.85E-01 | 9.85E+01 |  |  |
| 8034605 | NM_052850    | GADD45GIP1 | growth arrest and DNA-damage-inducible            | -0.021 | 0.986 | 8.98E-01 | 8.98E+01 |  |  |
| 8034608 | NM_005583    | LYL1       | lymphoblastic leukemia derived sequence           | -0.019 | 0.987 | 8.82E-01 | 8.82E+01 |  |  |
| 8034615 | NM_017722    | TRMT1      | TRM1 tRNA methyltransferase 1 human               | -0.046 | 0.969 | 7.41E-01 | 7.41E+01 |  |  |
| 8034631 | NM_003765    | STX10      | syntaxin 10                                       | 0.010  | 1.007 | 9.50E-01 | 9.50E+01 |  |  |
| 8034643 | NM_00112722  | CACNA1A    | calcium channel, voltage-dependent                | -0.040 | 0.973 | 5.34E-01 | 5.34E+01 |  |  |
| 8034696 | ---          | ---        | ---                                               | -0.063 | 0.957 | 6.70E-01 | 6.70E+01 |  |  |
| 8034698 | ---          | ---        | ---                                               | -0.014 | 0.990 | 9.53E-01 | 9.53E+01 |  |  |
| 8034700 | BC119719     | C19orf57   | chromosome 19 open reading frame                  | -0.043 | 0.970 | 6.81E-01 | 6.81E+01 |  |  |
| 8034712 | NM_024825    | PODNL1     | podocan-like 1                                    | -0.014 | 0.990 | 9.48E-01 | 9.48E+01 |  |  |
| 8034722 | NM_002918    | RFX1       | regulatory factor X, 1 (influences transcription) | -0.055 | 0.963 | 4.56E-01 | 4.56E+01 |  |  |
| 8034744 | NM_00114502  | PALM3      | Paralemmin-3                                      | -0.034 | 0.977 | 7.93E-01 | 7.93E+01 |  |  |
| 8034747 | ENST00000343 | C19orf67   | chromosome 19 open reading frame                  | -0.038 | 0.974 | 6.70E-01 | 6.70E+01 |  |  |
| 8034754 | NM_138352    | SAMD1      | sterile alpha motif domain containing             | -0.094 | 0.937 | 3.87E-01 | 3.87E+01 |  |  |
| 8034762 | NM_002730    | PRKACA     | protein kinase, cAMP-dependent, alpha             | 0.080  | 1.057 | 5.98E-01 | 5.98E+01 |  |  |
| 8034783 | NM_00100870  | LPHN1      | latrophilin 1                                     | -0.043 | 0.971 | 7.12E-01 | 7.12E+01 |  |  |
| 8034806 | NM_005804    | DDX39      | DEAD (Asp-Glu-Ala-Asp) box polypeptide            | -0.068 | 0.954 | 6.78E-01 | 6.78E+01 |  |  |
| 8034821 | NM_000955    | PTGER1     | prostaglandin E receptor 1 (subtype)              | -0.067 | 0.955 | 4.48E-01 | 4.48E+01 |  |  |
| 8034827 | NM_005716    | GIPC1      | GIPC PDZ domain containing family                 | -0.007 | 0.995 | 9.61E-01 | 9.61E+01 |  |  |
| 8034837 | NM_006145    | DNAJB1     | DnaJ (Hsp40) homolog, subfamily 1                 | -0.202 | 0.869 | 2.14E-01 | 2.14E+01 |  |  |
| 8034843 | NM_004146    | NDUFB7     | NADH dehydrogenase (ubiquinone)                   | -0.019 | 0.987 | 9.19E-01 | 9.19E+01 |  |  |
| 8034871 | ---          | ---        | ---                                               | -0.060 | 0.959 | 6.57E-01 | 6.57E+01 |  |  |
| 8034873 | NM_013447    | EMR2       | egf-like module containing, mucin                 | 0.404  | 1.323 | 1.02E-01 | 1.02E+01 |  |  |
| 8034907 | NM_005071    | SLC1A6     | solute carrier family 1 (high affinity)           | -0.007 | 0.995 | 9.74E-01 | 9.74E+01 |  |  |
| 8034920 | NM_006844    | ILVBL      | ilvB (bacterial acetolactate synthase)            | 0.030  | 1.021 | 8.46E-01 | 8.46E+01 |  |  |
| 8034940 | NM_000435    | NOTCH3     | Notch homolog 3 (Drosophila)                      | 0.018  | 1.013 | 8.67E-01 | 8.67E+01 |  |  |
| 8034983 | NM_058243    | BRD4       | bromodomain containing 4                          | -0.041 | 0.972 | 6.60E-01 | 6.60E+01 |  |  |
| 8035007 | NM_005858    | AKAP8      | A kinase (PRKA) anchor protein 8                  | -0.047 | 0.968 | 5.85E-01 | 5.85E+01 |  |  |
| 8035023 | NM_014371    | AKAP8L     | A kinase (PRKA) anchor protein 8-long             | -0.019 | 0.987 | 9.12E-01 | 9.12E+01 |  |  |
| 8035040 | NM_021241    | WIZ        | widely interspaced zinc finger motif              | -0.001 | 1.000 | 9.98E-01 | 9.98E+01 |  |  |
| 8035050 | NM_022904    | RASAL3     | RAS protein activator like 3                      | -0.092 | 0.938 | 4.35E-01 | 4.35E+01 |  |  |
| 8035120 | NM_021235    | EP515L1    | epidermal growth factor receptor                  | -0.180 | 0.882 | 3.17E-02 | 3.17E+00 |  |  |
| 8035144 | ---          | ---        | ---                                               | 0.033  | 1.023 | 9.51E-01 | 9.51E+01 |  |  |
| 8035156 | NM_006387    | CHERP      | calcium homeostasis endoplasmic                   | -0.052 | 0.965 | 6.14E-01 | 6.14E+01 |  |  |
| 8035175 | ---          | ---        | ---                                               | -0.023 | 0.984 | 9.29E-01 | 9.29E+01 |  |  |
| 8035177 | NM_024881    | SLC35E1    | solute carrier family 35, member 1                | -0.030 | 0.979 | 8.56E-01 | 8.56E+01 |  |  |
| 8035187 | NM_004831    | MED26      | mediator complex subunit 26                       | 0.013  | 1.009 | 9.43E-01 | 9.43E+01 |  |  |
| 8035193 | NM_024104    | C19orf42   | chromosome 19 open reading frame                  | 0.121  | 1.088 | 3.57E-01 | 3.57E+01 |  |  |
| 8035201 | NM_015692    | CPAMD8     | C3 and PZP-like, alpha-2-macroglobulin            | -0.045 | 0.969 | 6.87E-01 | 6.87E+01 |  |  |
| 8035232 | ---          | ---        | ---                                               | 0.118  | 1.085 | 1.50E-01 | 1.50E+01 |  |  |
| 8035234 | ---          | ---        | ---                                               | -0.057 | 0.961 | 7.84E-01 | 7.84E+01 |  |  |
| 8035236 | NM_033417    | HAUS8      | HAUS augmin-like complex, subunit                 | -0.044 | 0.970 | 7.58E-01 | 7.58E+01 |  |  |
| 8035249 | NM_005234    | NR2F6      | nuclear receptor subfamily 2, group               | -0.014 | 0.990 | 9.32E-01 | 9.32E+01 |  |  |
| 8035254 | NM_031941    | USHBP1     | Usher syndrome 1C binding protein                 | -0.040 | 0.973 | 6.92E-01 | 6.92E+01 |  |  |
| 8035271 | NM_024527    | ABHD8      | abhydrolase domain containing 8                   | -0.051 | 0.965 | 5.78E-01 | 5.78E+01 |  |  |
| 8035278 | NM_020959    | ANO8       | anoctamin 8                                       | 0.029  | 1.021 | 8.06E-01 | 8.06E+01 |  |  |
| 8035297 | NM_031310    | PLVAP      | plasmalemma vesicle associated protein            | 0.004  | 1.003 | 9.78E-01 | 9.78E+01 |  |  |
| 8035304 | NM_004335    | BST2       | bone marrow stromal cell antigen                  | 0.157  | 1.115 | 6.39E-01 | 6.39E+01 |  |  |
| 8035311 | ENST00000341 | TMEM221    | transmembrane protein 221                         | -0.050 | 0.966 | 7.03E-01 | 7.03E+01 |  |  |
| 8035315 | NM_138454    | NXNL1      | nucleoredoxin-like 1                              | -0.063 | 0.957 | 5.25E-01 | 5.25E+01 |  |  |
| 8035345 | NM_005543    | INSL3      | insulin-like 3 (Leydig cell)                      | -0.056 | 0.962 | 5.72E-01 | 5.72E+01 |  |  |
| 8035351 | NM_000215    | JAK3       | Janus kinase 3                                    | 0.019  | 1.013 | 9.15E-01 | 9.15E+01 |  |  |
| 8035380 | NM_005535    | IL12RB1    | interleukin 12 receptor, beta 1                   | 0.102  | 1.073 | 2.31E-01 | 2.31E+01 |  |  |
| 8035398 | NM_002866    | RAB3A      | RAB3A, member RAS oncogene family                 | -0.044 | 0.970 | 7.37E-01 | 7.37E+01 |  |  |
| 8035408 | NM_000923    | PDE4C      | phosphodiesterase 4C, cAMP-specific               | -0.052 | 0.965 | 6.02E-01 | 6.02E+01 |  |  |
| 8035435 | NM_00114530  | KIAA1683   | KIAA1683                                          | -0.045 | 0.969 | 6.31E-01 | 6.31E+01 |  |  |
| 8035445 | NM_005354    | JUND       | jun D proto-oncogene                              | -0.086 | 0.942 | 2.25E-01 | 2.25E+01 |  |  |
| 8035449 | NM_012321    | LSM4       | LSM4 homolog, U6 small nuclear RNA                | -0.060 | 0.959 | 3.55E-01 | 3.55E+01 |  |  |
| 8035456 | NM_145256    | LRRC25     | leucine rich repeat containing 25                 | 0.068  | 1.049 | 7.51E-01 | 7.51E+01 |  |  |
| 8035465 | NM_016368    | ISYNA1     | inositol-3-phosphate synthase 1                   | 0.023  | 1.016 | 8.92E-01 | 8.92E+01 |  |  |
| 8035477 | NM_006532    | ELL        | elongation factor RNA polymerase                  | -0.107 | 0.928 | 1.21E-01 | 1.21E+01 |  |  |
| 8035494 | NM_012181    | FKBP8      | FK506 binding protein 8, 38kDa                    | -0.015 | 0.990 | 9.09E-01 | 9.09E+01 |  |  |
| 8035506 | NM_004750    | CRLF1      | cytokine receptor-like factor 1                   | -0.095 | 0.936 | 3.01E-01 | 3.01E+01 |  |  |
| 8035517 | NM_000095    | COMP       | cartilage oligomeric matrix protein               | -0.018 | 0.987 | 9.16E-01 | 9.16E+01 |  |  |
| 8035539 | NM_001492    | GDF1       | growth differentiation factor 1                   | -0.021 | 0.986 | 8.67E-01 | 8.67E+01 |  |  |
| 8035551 | BC004943     | MGC10814   | hypothetical protein MGC10814                     | 0.045  | 1.032 | 6.94E-01 | 6.94E+01 |  |  |

|         |              |          |                                      |        |       |          |          |  |  |
|---------|--------------|----------|--------------------------------------|--------|-------|----------|----------|--|--|
| 8035553 | NM_007263    | COPE     | coatomer protein complex, subun      | 0.046  | 1.032 | 7.04E-01 | 7.04E+01 |  |  |
| 8035566 | NM_004838    | HOMER3   | homer homolog 3 (Drosophila)         | -0.008 | 0.994 | 9.58E-01 | 9.58E+01 |  |  |
| 8035581 | NM_00101739  | SFRS14   | splicing factor, arginine/serine-ric | -0.050 | 0.966 | 7.34E-01 | 7.34E+01 |  |  |
| 8035600 | NM_017814    | TMEM161A | transmembrane protein 161A           | -0.048 | 0.967 | 6.84E-01 | 6.84E+01 |  |  |
| 8035612 | NM_00114578  | MEF2B    | myocyte enhancer factor 2B           | -0.075 | 0.949 | 4.34E-01 | 4.34E+01 |  |  |
| 8035628 | NM_176880    | NR2C2AP  | nuclear receptor 2C2-associated p    | -0.067 | 0.954 | 7.24E-01 | 7.24E+01 |  |  |
| 8035639 | NM_023002    | HAPLN4   | hyaluronan and proteoglycan link     | -0.031 | 0.979 | 8.54E-01 | 8.54E+01 |  |  |
| 8035646 | NM_023002    | HAPLN4   | hyaluronan and proteoglycan link     | -0.072 | 0.951 | 5.28E-01 | 5.28E+01 |  |  |
| 8035648 | NM_00100152  | TM6SF2   | transmembrane 6 superfamily me       | 0.003  | 1.002 | 9.81E-01 | 9.81E+01 |  |  |
| 8035666 | NM_172231    | SF4      | splicing factor 4                    | -0.099 | 0.934 | 2.78E-01 | 2.78E+01 |  |  |
| 8035682 | ---          | ---      | ---                                  | 0.028  | 1.020 | 8.65E-01 | 8.65E+01 |  |  |
| 8035694 | NM_025245    | PBX4     | pre-B-cell leukemia homeobox 4       | -0.113 | 0.924 | 2.50E-01 | 2.50E+01 |  |  |
| 8035703 | NM_004720    | LPAR2    | lysophosphatidic acid receptor 2     | -0.030 | 0.980 | 8.53E-01 | 8.53E+01 |  |  |
| 8035714 | NM_016573    | GMIP     | GEM interacting protein              | -0.033 | 0.978 | 8.14E-01 | 8.14E+01 |  |  |
| 8035737 | NM_020410    | ATP13A1  | ATPase type 13A1                     | -0.021 | 0.986 | 8.81E-01 | 8.81E+01 |  |  |
| 8035765 | NM_021030    | ZNF14    | zinc finger protein 14               | -0.037 | 0.975 | 9.16E-01 | 9.16E+01 |  |  |
| 8035773 | NM_00109926  | ZNF506   | zinc finger protein 506              | -0.003 | 0.998 | 9.91E-01 | 9.91E+01 |  |  |
| 8035779 | NM_00107667  | ZNF626   | zinc finger protein 626              | -0.090 | 0.940 | 7.53E-01 | 7.53E+01 |  |  |
| 8035787 | ---          | ---      | ---                                  | 0.048  | 1.034 | 8.94E-01 | 8.94E+01 |  |  |
| 8035789 | NM_00103988  | ZNF826   | zinc finger protein 826              | 0.107  | 1.077 | 6.38E-01 | 6.38E+01 |  |  |
| 8035793 | NM_00115929  | ZNF737   | zinc finger protein 737              | 0.085  | 1.061 | 7.44E-01 | 7.44E+01 |  |  |
| 8035795 | NM_145297    | ZNF626   | zinc finger protein 626              | 0.095  | 1.068 | 6.27E-01 | 6.27E+01 |  |  |
| 8035801 | ---          | ---      | ---                                  | -0.116 | 0.923 | 3.53E-01 | 3.53E+01 |  |  |
| 8035803 | NM_021269    | ZNF708   | zinc finger protein 708              | 0.077  | 1.055 | 4.69E-01 | 4.69E+01 |  |  |
| 8035808 | NM_173531    | ZNF100   | zinc finger protein 100              | 0.106  | 1.076 | 8.33E-01 | 8.33E+01 |  |  |
| 8035829 | NM_000995    | RPL34    | ribosomal protein L34                | 0.028  | 1.019 | 7.72E-01 | 7.72E+01 |  |  |
| 8035842 | NM_003430    | ZNF91    | zinc finger protein 91               | 0.053  | 1.037 | 8.16E-01 | 8.16E+01 |  |  |
| 8035859 | ---          | ---      | ---                                  | 0.005  | 1.004 | 9.82E-01 | 9.82E+01 |  |  |
| 8035880 | NM_006003    | UQCRCF1  | ubiquinol-cytochrome c reductase     | 0.036  | 1.025 | 9.04E-01 | 9.04E+01 |  |  |
| 8035884 | ---          | ---      | ---                                  | 0.032  | 1.022 | 8.09E-01 | 8.09E+01 |  |  |
| 8035886 | NM_031448    | C19orf12 | chromosome 19 open reading fram      | -0.033 | 0.977 | 8.40E-01 | 8.40E+01 |  |  |
| 8035896 | NM_020856    | TSHZ3    | teashirt zinc finger homeobox 3      | 0.282  | 1.216 | 6.65E-02 | 6.65E+00 |  |  |
| 8035903 | ---          | ---      | ---                                  | -0.100 | 0.933 | 3.03E-01 | 3.03E+01 |  |  |
| 8035905 | NM_032139    | ANKRD27  | ankyrin repeat domain 27 (VPS9 d     | -0.084 | 0.944 | 5.78E-01 | 5.78E+01 |  |  |
| 8035939 | ---          | ---      | ---                                  | -0.121 | 0.920 | 4.11E-01 | 4.11E+01 |  |  |
| 8035941 | NM_014270    | SLC7A9   | solute carrier family 7 (cationic an | 0.027  | 1.019 | 8.66E-01 | 8.66E+01 |  |  |
| 8035956 | ---          | ---      | ---                                  | 0.018  | 1.012 | 9.28E-01 | 9.28E+01 |  |  |
| 8035958 | NM_032816    | CCDC123  | coiled-coil domain containing 123    | -0.090 | 0.940 | 5.29E-01 | 5.29E+01 |  |  |
| 8035993 | NM_019849    | SLC7A10  | solute carrier family 7, (neutral an | -0.057 | 0.961 | 4.74E-01 | 4.74E+01 |  |  |
| 8036004 | NM_004364    | CEBPA    | CCAAT/enhancer binding protein       | 0.032  | 1.022 | 8.33E-01 | 8.33E+01 |  |  |
| 8036010 | NM_000285    | PEPD     | peptidase D                          | 0.037  | 1.026 | 8.36E-01 | 8.36E+01 |  |  |
| 8036031 | ---          | ---      | ---                                  | -0.024 | 0.984 | 8.93E-01 | 8.93E+01 |  |  |
| 8036045 | NM_175872    | ZNF792   | zinc finger protein 792              | -0.041 | 0.972 | 8.15E-01 | 8.15E+01 |  |  |
| 8036069 | NM_152481    | FAM187B  | family with sequence similarity 18   | 0.022  | 1.015 | 8.29E-01 | 8.29E+01 |  |  |
| 8036079 | NM_033317    | DMKN     | dermokine                            | -0.017 | 0.989 | 9.07E-01 | 9.07E+01 |  |  |
| 8036103 | NM_198538    | SBSN     | suprabasin                           | -0.018 | 0.988 | 9.16E-01 | 9.16E+01 |  |  |
| 8036133 | NM_007000    | UPK1A    | uroplakin 1A                         | -0.015 | 0.990 | 9.47E-01 | 9.47E+01 |  |  |
| 8036136 | NM_024660    | TMEM149  | transmembrane protein 149            | 0.089  | 1.064 | 3.56E-01 | 3.56E+01 |  |  |
| 8036143 | NM_00104042  | U2AF1L4  | U2 small nuclear RNA auxiliary fac   | 0.015  | 1.011 | 9.73E-01 | 9.73E+01 |  |  |
| 8036151 | NM_144617    | HSPB6    | heat shock protein, alpha-crystalli  | -0.135 | 0.911 | 1.74E-01 | 1.74E+01 |  |  |
| 8036170 | ENST00000443 | PRODH2   | proline dehydrogenase (oxidase) 2    | 0.017  | 1.012 | 9.36E-01 | 9.36E+01 |  |  |
| 8036172 | ENST00000443 | PRODH2   | proline dehydrogenase (oxidase) 2    | -0.025 | 0.982 | 8.57E-01 | 8.57E+01 |  |  |
| 8036207 | NM_139239    | NFKBID   | nuclear factor of kappa light polyp  | -0.007 | 0.995 | 9.70E-01 | 9.70E+01 |  |  |
| 8036232 | NM_00103987  | C19orf46 | chromosome 19 open reading fram      | 0.024  | 1.017 | 8.69E-01 | 8.69E+01 |  |  |
| 8036242 | NM_032878    | ALKBH6   | alkB, alkylation repair homolog 6 (  | -0.050 | 0.966 | 7.46E-01 | 7.46E+01 |  |  |
| 8036252 | NM_015526    | CLIP3    | CAP-GLY domain containing linker     | -0.082 | 0.945 | 3.94E-01 | 3.94E+01 |  |  |
| 8036270 | NM_152658    | THAP8    | THAP domain containing 8             | -0.022 | 0.985 | 8.93E-01 | 8.93E+01 |  |  |
| 8036276 | NM_006233    | POLR21   | polymerase (RNA) II (DNA directe     | 0.014  | 1.010 | 9.68E-01 | 9.68E+01 |  |  |
| 8036291 | NM_00104247  | ZNF565   | zinc finger protein 565              | 0.035  | 1.024 | 8.47E-01 | 8.47E+01 |  |  |
| 8036324 | NM_00101275  | ZNF260   | zinc finger protein 260              | -0.034 | 0.977 | 8.78E-01 | 8.78E+01 |  |  |
| 8036351 | BC052603     | ZNF850P  | zinc finger protein 850 pseudogen    | -0.055 | 0.962 | 7.39E-01 | 7.39E+01 |  |  |
| 8036357 | NM_206894    | ZNF790   | zinc finger protein 790              | 0.038  | 1.026 | 9.22E-01 | 9.22E+01 |  |  |
| 8036363 | ---          | ---      | ---                                  | 0.022  | 1.015 | 9.84E-01 | 9.84E+01 |  |  |
| 8036365 | NM_00103723  | ZNF829   | zinc finger protein 829              | -0.077 | 0.948 | 6.57E-01 | 6.57E+01 |  |  |
| 8036389 | NM_152279    | ZNF585B  | zinc finger protein 585B             | -0.034 | 0.977 | 9.19E-01 | 9.19E+01 |  |  |
| 8036420 | NM_014898    | ZFP30    | zinc finger protein 30 homolog (m    | 0.008  | 1.006 | 9.80E-01 | 9.80E+01 |  |  |
| 8036460 | NM_004647    | DPF1     | D4, zinc and double PHD fingers fa   | -0.058 | 0.961 | 6.21E-01 | 6.21E+01 |  |  |
| 8036473 | NM_033256    | PPP1R14A | protein phosphatase 1, regulatory    | 0.095  | 1.068 | 7.11E-01 | 7.11E+01 |  |  |
| 8036479 | NM_033557    | YIF1B    | Yip1 interacting factor homolog B    | -0.084 | 0.943 | 1.29E-01 | 1.29E+01 |  |  |
| 8036483 | NM_033557    | YIF1B    | Yip1 interacting factor homolog B    | -0.011 | 0.993 | 9.51E-01 | 9.51E+01 |  |  |
| 8036494 | NM_152657    | GGN      | gametogenetin                        | -0.042 | 0.971 | 6.94E-01 | 6.94E+01 |  |  |
| 8036503 | NM_170604    | RASGRP4  | RAS guanyl releasing protein 4       | 0.017  | 1.012 | 9.32E-01 | 9.32E+01 |  |  |
| 8036525 | NM_00104260  | MAP4K1   | mitogen-activated protein kinase     | 0.060  | 1.042 | 7.45E-01 | 7.45E+01 |  |  |
| 8036557 | ---          | ---      | ---                                  | -0.041 | 0.972 | 8.50E-01 | 8.50E+01 |  |  |
| 8036563 | NM_144691    | CAPN12   | calpain 12                           | 0.041  | 1.029 | 7.27E-01 | 7.27E+01 |  |  |
| 8036584 | NM_002307    | LGALS7   | lectin, galactoside-binding, soluble | -0.006 | 0.996 | 9.67E-01 | 9.67E+01 |  |  |
| 8036591 | NM_006149    | LGALS4   | lectin, galactoside-binding, soluble | -0.004 | 0.997 | 9.88E-01 | 9.88E+01 |  |  |

|         |             |              |                                      |        |       |          |          |  |
|---------|-------------|--------------|--------------------------------------|--------|-------|----------|----------|--|
| 8036602 | NM_001398   | ECH1         | enoyl Coenzyme A hydratase 1, pe     | -0.060 | 0.959 | 6.56E-01 | 6.56E+01 |  |
| 8036613 | NM_001533   | HNRNPL       | heterogeneous nuclear ribonucle      | 0.061  | 1.043 | 5.71E-01 | 5.71E+01 |  |
| 8036622 | NM_198445   | RINL         | Ras and Rab interactor-like          | -0.048 | 0.967 | 5.74E-01 | 5.74E+01 |  |
| 8036636 | NM_012237   | SIRT2        | sirtuin (silent mating type informa  | -0.005 | 0.997 | 9.80E-01 | 9.80E+01 |  |
| 8036656 | NM_017827   | SARS2        | seryl-tRNA synthetase 2, mitochor    | -0.024 | 0.983 | 8.37E-01 | 8.37E+01 |  |
| 8036676 | NM_024907   | FBXO17       | F-box protein 17                     | -0.015 | 0.989 | 9.27E-01 | 9.27E+01 |  |
| 8036686 | AK021860    | FBXO17       | F-box protein 17                     | -0.033 | 0.977 | 7.90E-01 | 7.90E+01 |  |
| 8036699 | NM_00108046 | SYCN         | syncollin                            | -0.040 | 0.973 | 8.36E-01 | 8.36E+01 |  |
| 8036702 | NM_172139   | IL28B        | interleukin 28B (interferon, lambd   | 0.062  | 1.044 | 6.06E-01 | 6.06E+01 |  |
| 8036707 | NM_020862   | LRFN1        | leucine rich repeat and fibronectin  | 0.058  | 1.041 | 6.31E-01 | 6.31E+01 |  |
| 8036710 | NM_004877   | GMFG         | glia maturation factor, gamma        | 0.041  | 1.029 | 7.49E-01 | 7.49E+01 |  |
| 8036720 | NM_019088   | PAF1         | Paf1, RNA polymerase II associat     | -0.085 | 0.943 | 5.48E-01 | 5.48E+01 |  |
| 8036737 | NM_001020   | RPS16        | ribosomal protein S16                | -0.052 | 0.965 | 7.33E-01 | 7.33E+01 |  |
| 8036749 | NM_153232   | EID2         | EP300 interacting inhibitor of diffe | -0.024 | 0.984 | 8.44E-01 | 8.44E+01 |  |
| 8036763 | NM_004714   | DYRK1B       | dual-specificity tyrosine-(Y)-phosp  | -0.049 | 0.967 | 5.34E-01 | 5.34E+01 |  |
| 8036777 | NM_001436   | FBL          | fibrillarin                          | 0.003  | 1.002 | 9.90E-01 | 9.90E+01 |  |
| 8036787 | NM_003890   | FCGBP        | Fc fragment of IgG binding protein   | -0.171 | 0.888 | 6.46E-02 | 6.46E+00 |  |
| 8036808 | NM_018457   | PRR13        | proline rich 13                      | 0.039  | 1.027 | 7.81E-01 | 7.81E+01 |  |
| 8036813 | NM_00100585 | ZNF780B      | zinc finger protein 780B             | 0.091  | 1.065 | 6.38E-01 | 6.38E+01 |  |
| 8036820 | NM_00114257 | ZNF780A      | zinc finger protein 780A             | -0.064 | 0.957 | 6.35E-01 | 6.35E+01 |  |
| 8036830 | NM_152479   | TTC9B        | tetratricopeptide repeat domain 9    | 0.055  | 1.039 | 6.88E-01 | 6.88E+01 |  |
| 8036835 | NM_024877   | CNTD2        | cyclin N-terminal domain containi    | -0.050 | 0.966 | 7.53E-01 | 7.53E+01 |  |
| 8036840 | NM_001626   | AKT2         | v-akt murine thymoma viral oncog     | -0.017 | 0.989 | 9.11E-01 | 9.11E+01 |  |
| 8036862 | AY358191    | UNQ6167      | NINP6167                             | 0.092  | 1.066 | 2.86E-01 | 2.86E+01 |  |
| 8036867 | BC027935    | C19orf47     | chromosome 19 open reading fram      | 0.068  | 1.048 | 4.46E-01 | 4.46E+01 |  |
| 8036883 | NM_144685   | HIPK4        | homeodomain interacting protein      | 0.039  | 1.028 | 7.33E-01 | 7.33E+01 |  |
| 8036890 | NM_020956   | PRX          | periaxin                             | -0.049 | 0.967 | 5.53E-01 | 5.53E+01 |  |
| 8036902 | NM_013376   | SERTAD1      | SERTA domain containing 1            | -0.103 | 0.931 | 2.15E-01 | 2.15E+01 |  |
| 8036908 | NM_013368   | SERTAD3      | SERTA domain containing 3            | 0.119  | 1.086 | 6.23E-01 | 6.23E+01 |  |
| 8036913 | NM_000713   | BLVRB        | biliverdin reductase B (flavin redu  | 0.237  | 1.179 | 5.90E-02 | 5.90E+00 |  |
| 8036923 | NM_004756   | NUMBL        | numb homolog (Drosophila)-like       | -0.037 | 0.975 | 7.09E-01 | 7.09E+01 |  |
| 8036936 | AK096566    | LOC100130713 | hypothetical LOC100130713            | -0.219 | 0.859 | 6.19E-02 | 6.19E+00 |  |
| 8036938 | NM_024876   | ADCK4        | aarf domain containing kinase 4      | -0.016 | 0.989 | 9.00E-01 | 9.00E+01 |  |
| 8036956 | NM_198476   | C19orf54     | chromosome 19 open reading fram      | -0.006 | 0.996 | 9.72E-01 | 9.72E+01 |  |
| 8036969 | NM_000762   | CYP2A6       | cytochrome P450, family 2, subfar    | -0.002 | 0.998 | 9.89E-01 | 9.89E+01 |  |
| 8036981 | NM_000764   | CYP2A7       | cytochrome P450, family 2, subfar    | -0.002 | 0.999 | 9.94E-01 | 9.94E+01 |  |
| 8036989 | ---         | ---          | ---                                  | -0.009 | 0.994 | 9.68E-01 | 9.68E+01 |  |
| 8037003 | ---         | ---          | ---                                  | -0.029 | 0.980 | 9.36E-01 | 9.36E+01 |  |
| 8037005 | NM_000660   | TGFB1        | transforming growth factor, beta 1   | -0.042 | 0.971 | 8.62E-01 | 8.62E+01 |  |
| 8037018 | NM_030578   | B9D2         | B9 protein domain 2                  | -0.088 | 0.941 | 3.41E-01 | 3.41E+01 |  |
| 8037023 | NM_020158   | EXOSC5       | exosome component 5                  | 0.008  | 1.006 | 9.64E-01 | 9.64E+01 |  |
| 8037032 | NM_198540   | B3GNT8       | UDP-GlcNAc:betaGal beta-1,3-N-a      | 0.048  | 1.034 | 6.76E-01 | 6.76E+01 |  |
| 8037037 | NM_018035   | ATP5SL       | ATP5S-like                           | -0.001 | 0.999 | 9.98E-01 | 9.98E+01 |  |
| 8037043 | ---         | ---          | ---                                  | 0.025  | 1.018 | 8.62E-01 | 8.62E+01 |  |
| 8037045 | NM_001817   | CEACAM4      | carcinoembryonic antigen-related     | 0.039  | 1.028 | 6.89E-01 | 6.89E+01 |  |
| 8037061 | NM_173506   | LYPD4        | LY6/PLAUR domain containing 4        | -0.012 | 0.992 | 9.49E-01 | 9.49E+01 |  |
| 8037071 | NM_006423   | RABAC1       | Rab acceptor 1 (prenylated)          | -0.103 | 0.931 | 3.56E-01 | 3.56E+01 |  |
| 8037079 | NM_152296   | ATP1A3       | ATPase, Na+/K+ transporting, alph    | -0.018 | 0.987 | 9.14E-01 | 9.14E+01 |  |
| 8037103 | NM_002088   | GRIK5        | glutamate receptor, ionotropic, ka   | 0.024  | 1.017 | 8.87E-01 | 8.87E+01 |  |
| 8037123 | NM_002698   | POU2F2       | POU class 2 homeobox 2               | 0.054  | 1.038 | 6.00E-01 | 6.00E+01 |  |
| 8037144 | NM_133328   | DEDD2        | death effector domain containing     | -0.043 | 0.971 | 7.52E-01 | 7.52E+01 |  |
| 8037152 | NM_019884   | GSK3A        | glycogen synthase kinase 3 alpha     | -0.011 | 0.993 | 9.57E-01 | 9.57E+01 |  |
| 8037166 | NM_006494   | ERF          | Ets2 repressor factor                | -0.022 | 0.985 | 9.13E-01 | 9.13E+01 |  |
| 8037170 | NM_002573   | PAFAH1B3     | platelet-activating factor acetylhy  | -0.060 | 0.959 | 4.27E-01 | 4.27E+01 |  |
| 8037179 | NM_032488   | CNFN         | cornifelin                           | 0.009  | 1.006 | 9.58E-01 | 9.58E+01 |  |
| 8037186 | NM_005357   | LIPE         | lipase, hormone-sensitive            | -0.033 | 0.978 | 8.10E-01 | 8.10E+01 |  |
| 8037197 | NM_198477   | CXCL17       | chemokine (C-X-C motif) ligand 17    | 0.010  | 1.007 | 9.67E-01 | 9.67E+01 |  |
| 8037283 | NM_002780   | PSG4         | pregnancy specific beta-1-glycopre   | -0.052 | 0.964 | 7.71E-01 | 7.71E+01 |  |
| 8037290 | NM_002784   | PSG9         | pregnancy specific beta-1-glycopre   | -0.038 | 0.974 | 7.61E-01 | 7.61E+01 |  |
| 8037301 | NM_014400   | LYPD3        | LY6/PLAUR domain containing 3        | -0.030 | 0.980 | 8.27E-01 | 8.27E+01 |  |
| 8037309 | NM_198850   | PHLDB3       | pleckstrin homology-like domain,     | -0.032 | 0.978 | 8.47E-01 | 8.47E+01 |  |
| 8037315 | NM_198850   | PHLDB3       | pleckstrin homology-like domain,     | -0.006 | 0.996 | 9.77E-01 | 9.77E+01 |  |
| 8037322 | NM_014297   | ETHE1        | ethylmalonic encephalopathy 1        | 0.023  | 1.016 | 9.25E-01 | 9.25E+01 |  |
| 8037331 | NM_006297   | XRCC1        | X-ray repair complementing defec     | -0.123 | 0.918 | 2.56E-01 | 2.56E+01 |  |
| 8037352 | NM_00100756 | IRGQ         | immunity-related GTPase family, C    | -0.122 | 0.919 | 2.56E-01 | 2.56E+01 |  |
| 8037355 | NM_182498   | ZNF428       | zinc finger protein 428              | -0.064 | 0.957 | 6.27E-01 | 6.27E+01 |  |
| 8037363 | NM_145296   | CADM4        | cell adhesion molecule 4             | -0.065 | 0.956 | 5.06E-01 | 5.06E+01 |  |
| 8037389 | NM_019108   | C19orf61     | chromosome 19 open reading fram      | 0.068  | 1.048 | 5.73E-01 | 5.73E+01 |  |
| 8037408 | NM_002250   | KCNN4        | potassium intermediate/small con     | -0.029 | 0.980 | 7.98E-01 | 7.98E+01 |  |
| 8037422 | NM_00103174 | LYPD5        | LY6/PLAUR domain containing 5        | -0.005 | 0.997 | 9.81E-01 | 9.81E+01 |  |
| 8037474 | NM_013256   | ZNF180       | zinc finger protein 180              | -0.036 | 0.976 | 8.35E-01 | 8.35E+01 |  |
| 8037495 | NM_145288   | ZNF296       | zinc finger protein 296              | -0.034 | 0.977 | 7.82E-01 | 7.82E+01 |  |
| 8037502 | NM_00113106 | NKPD1        | NTPase, KAP family P-loop domain     | -0.005 | 0.996 | 9.76E-01 | 9.76E+01 |  |
| 8037505 | NM_024108   | TRAPPC6A     | trafficking protein particle comple  | -0.050 | 0.966 | 6.52E-01 | 6.52E+01 |  |
| 8037513 | NM_138568   | EXOC3L2      | exocyst complex component 3-like     | 0.011  | 1.007 | 9.45E-01 | 9.45E+01 |  |
| 8037535 | ---         | ---          | ---                                  | -0.028 | 0.981 | 8.80E-01 | 8.80E+01 |  |
| 8037537 | NM_000400   | ERCC2        | excision repair cross-complement     | -0.017 | 0.988 | 9.09E-01 | 9.09E+01 |  |

|         |             |          |                                      |        |       |          |          |  |
|---------|-------------|----------|--------------------------------------|--------|-------|----------|----------|--|
| 8037563 | NM_006663   | PPP1R13L | protein phosphatase 1, regulatory    | -0.047 | 0.968 | 5.89E-01 | 5.89E+01 |  |
| 8037579 | NM_202001   | ERCC1    | excision repair cross-complement     | -0.168 | 0.890 | 6.92E-02 | 6.92E+00 |  |
| 8037594 | NM_005619   | RTN2     | reticulon 2                          | -0.052 | 0.965 | 6.05E-01 | 6.05E+01 |  |
| 8037608 | NM_00101798 | OPA3     | optic atrophy 3 (autosomal recess    | 0.055  | 1.039 | 5.91E-01 | 5.91E+01 |  |
| 8037614 | NM_005282   | GPR4     | G protein-coupled receptor 4         | -0.059 | 0.960 | 5.57E-01 | 5.57E+01 |  |
| 8037621 | NM_012155   | EML2     | echinoderm microtubule associate     | 0.042  | 1.030 | 7.96E-01 | 7.96E+01 |  |
| 8037640 | ---         | ---      | ---                                  | 0.010  | 1.007 | 9.56E-01 | 9.56E+01 |  |
| 8037642 | NM_177542   | SNRPD2   | small nuclear ribonucleoprotein D    | -0.018 | 0.988 | 9.09E-01 | 9.09E+01 |  |
| 8037647 | NM_00108046 | FBXO46   | F-box protein 46                     | -0.077 | 0.948 | 4.70E-01 | 4.70E+01 |  |
| 8037651 | NM_175875   | SIX5     | SIX homeobox 5                       | -0.016 | 0.989 | 8.89E-01 | 8.89E+01 |  |
| 8037657 | NM_004409   | DMPK     | dystrophia myotonica-protein kin     | -0.040 | 0.973 | 6.37E-01 | 6.37E+01 |  |
| 8037679 | NM_004943   | DMWD     | dystrophia myotonica, WD repeat      | -0.083 | 0.944 | 2.54E-01 | 2.54E+01 |  |
| 8037688 | NM_030785   | RSHL1    | radial spokehead-like 1              | -0.026 | 0.982 | 8.47E-01 | 8.47E+01 |  |
| 8037695 | NM_004819   | SYMPK    | sympleskin                           | -0.002 | 0.998 | 9.91E-01 | 9.91E+01 |  |
| 8037723 | NM_015649   | IRF2BP1  | interferon regulatory factor 2 bind  | -0.032 | 0.978 | 7.94E-01 | 7.94E+01 |  |
| 8037728 | NM_00101264 | MYPOP    | Myb-related transcription factor, g  | -0.072 | 0.951 | 3.94E-01 | 3.94E+01 |  |
| 8037732 | NM_00102986 | NANOS2   | nanos homolog 2 (Drosophila)         | 0.043  | 1.030 | 7.53E-01 | 7.53E+01 |  |
| 8037737 | NM_002516   | NOVA2    | neuro-oncological ventral antigen    | 0.005  | 1.003 | 9.76E-01 | 9.76E+01 |  |
| 8037742 | NM_005091   | PGLYRP1  | peptidoglycan recognition protein    | -0.054 | 0.963 | 7.31E-01 | 7.31E+01 |  |
| 8037762 | NM_032040   | CCDC8    | coiled-coil domain containing 8      | -0.046 | 0.969 | 7.35E-01 | 7.35E+01 |  |
| 8037767 | NM_018215   | PNMAL1   | PNMA-like 1                          | 0.024  | 1.017 | 8.46E-01 | 8.46E+01 |  |
| 8037775 | NM_000960   | PTGIR    | prostaglandin I2 (prostacyclin) rec  | -0.200 | 0.871 | 5.18E-02 | 5.18E+00 |  |
| 8037785 | NM_033258   | GNNG8    | guanine nucleotide binding protei    | -0.109 | 0.928 | 4.08E-01 | 4.08E+01 |  |
| 8037788 | NM_145056   | DACT3    | dapper, antagonist of beta-catenin   | -0.095 | 0.936 | 3.11E-01 | 3.11E+01 |  |
| 8037794 | NM_016457   | PRKD2    | protein kinase D2                    | -0.007 | 0.995 | 9.82E-01 | 9.82E+01 |  |
| 8037814 | ---         | ---      | ---                                  | 0.059  | 1.042 | 7.38E-01 | 7.38E+01 |  |
| 8037816 | NM_013403   | STRN4    | striatin, calmodulin binding protei  | 0.028  | 1.020 | 8.08E-01 | 8.08E+01 |  |
| 8037835 | NM_005628   | SLC1A5   | solute carrier family 1 (neutral am  | 0.113  | 1.082 | 3.81E-01 | 3.81E+01 |  |
| 8037847 | NM_004069   | AP2S1    | adaptor-related protein complex 2    | 0.054  | 1.038 | 8.52E-01 | 8.52E+01 |  |
| 8037853 | NM_017854   | TMEM160  | transmembrane protein 160            | -0.028 | 0.981 | 7.98E-01 | 7.98E+01 |  |
| 8037856 | NM_015168   | ZC3H4    | zinc finger CCHH-type containing 4   | -0.033 | 0.978 | 7.97E-01 | 7.97E+01 |  |
| 8037872 | NM_00112724 | BBIC3    | BCL2 binding component 3             | -0.030 | 0.979 | 8.31E-01 | 8.31E+01 |  |
| 8037878 | NM_020160   | MEIS3    | Meis homeobox 3                      | 0.018  | 1.013 | 9.26E-01 | 9.26E+01 |  |
| 8037888 | NM_015063   | SLC8A2   | solute carrier family 8 (sodium/cal  | -0.032 | 0.978 | 7.82E-01 | 7.82E+01 |  |
| 8037913 | NM_003827   | NAPA     | N-ethylmaleimide-sensitive factor    | 0.139  | 1.101 | 2.69E-01 | 2.69E+01 |  |
| 8037931 | NM_00110141 | ZNF541   | zinc finger protein 541              | -0.081 | 0.945 | 2.72E-01 | 2.72E+01 |  |
| 8037947 | NM_198479   | TPRX1    | tetra-peptide repeat homeobox 1      | 0.055  | 1.039 | 8.59E-01 | 8.59E+01 |  |
| 8037962 | NM_019855   | CABP5    | calcium binding protein 5            | -0.008 | 0.994 | 9.73E-01 | 9.73E+01 |  |
| 8037970 | NM_003706   | PLA2G4C  | phospholipase A2, group IVC (cyto    | 0.151  | 1.111 | 5.98E-01 | 5.98E+01 |  |
| 8037991 | NM_000234   | LIG1     | ligase I, DNA, ATP-dependent         | -0.059 | 0.960 | 5.76E-01 | 5.76E+01 |  |
| 8038023 | ---         | ---      | ---                                  | 0.052  | 1.037 | 8.23E-01 | 8.23E+01 |  |
| 8038029 | NM_014959   | CARD8    | caspase recruitment domain famil     | -0.022 | 0.985 | 9.02E-01 | 9.02E+01 |  |
| 8038048 | NM_144577   | CCDC114  | coiled-coil domain containing 114    | 0.011  | 1.008 | 9.56E-01 | 9.56E+01 |  |
| 8038069 | NM_018273   | TMEM143  | transmembrane protein 143            | -0.010 | 0.993 | 9.62E-01 | 9.62E+01 |  |
| 8038078 | NM_006801   | KDELRL1  | KDEL (Lys-Asp-Glu-Leu) endoplasm     | -0.021 | 0.985 | 9.12E-01 | 9.12E+01 |  |
| 8038086 | NM_000979   | RPL18    | ribosomal protein L18                | -0.004 | 0.997 | 9.86E-01 | 9.86E+01 |  |
| 8038093 | NM_00108043 | LMTK3    | lemur tyrosine kinase 3              | -0.073 | 0.951 | 5.50E-01 | 5.50E+01 |  |
| 8038109 | NM_017708   | FAM83E   | family with sequence similarity 83   | -0.151 | 0.900 | 1.36E-02 | 1.36E+00 |  |
| 8038117 | NM_001352   | DBP      | D site of albumin promoter (album    | -0.047 | 0.968 | 6.98E-01 | 6.98E+01 |  |
| 8038126 | NM_001217   | CA11     | carbonic anhydrase XI                | 0.057  | 1.040 | 5.50E-01 | 5.50E+01 |  |
| 8038139 | NM_145807   | NTN5     | netrin 5                             | -0.059 | 0.960 | 6.34E-01 | 6.34E+01 |  |
| 8038150 | NM_182574   | MAMSTR   | MEF2 activating motif and SAP do     | -0.115 | 0.924 | 1.42E-01 | 1.42E+01 |  |
| 8038192 | NM_000148   | FUT1     | fucosyltransferase 1 (galactoside 2  | -0.027 | 0.981 | 8.62E-01 | 8.62E+01 |  |
| 8038200 | ---         | ---      | ---                                  | 0.125  | 1.091 | 1.59E-01 | 1.59E+01 |  |
| 8038225 | NM_020904   | PLEKHA4  | pleckstrin homology domain conta     | -0.074 | 0.950 | 3.85E-01 | 3.85E+01 |  |
| 8038261 | NM_002103   | GYS1     | glycogen synthase 1 (muscle)         | -0.074 | 0.950 | 3.93E-01 | 3.93E+01 |  |
| 8038278 | NM_000894   | LHB      | luteinizing hormone beta polypept    | -0.026 | 0.982 | 8.89E-01 | 8.89E+01 |  |
| 8038280 | NM_000737   | CGB      | chorionic gonadotropin, beta poly    | -0.078 | 0.947 | 1.38E-01 | 1.38E+01 |  |
| 8038288 | NM_033377   | CGB1     | chorionic gonadotropin, beta poly    | -0.085 | 0.943 | 2.11E-01 | 2.11E+01 |  |
| 8038292 | NM_033043   | CGB5     | chorionic gonadotropin, beta poly    | -0.070 | 0.953 | 2.35E-01 | 2.35E+01 |  |
| 8038299 | NM_033142   | CGB7     | chorionic gonadotropin, beta poly    | -0.041 | 0.972 | 6.54E-01 | 6.54E+01 |  |
| 8038314 | NM_018111   | C19orf73 | chromosome 19 open reading fram      | -0.028 | 0.981 | 8.67E-01 | 8.67E+01 |  |
| 8038319 | NM_002152   | HRC      | histidine rich calcium binding prot  | 0.044  | 1.031 | 7.73E-01 | 7.73E+01 |  |
| 8038326 | NM_014037   | SLC6A16  | solute carrier family 6, member 16   | 0.133  | 1.097 | 4.83E-01 | 4.83E+01 |  |
| 8038343 | ---         | ---      | ---                                  | 0.127  | 1.092 | 3.20E-01 | 3.20E+01 |  |
| 8038347 | NM_003598   | TEAD2    | TEA domain family member 2           | -0.054 | 0.963 | 6.02E-01 | 6.02E+01 |  |
| 8038362 | NM_178449   | PTH2     | parathyroid hormone 2                | -0.057 | 0.961 | 5.40E-01 | 5.40E+01 |  |
| 8038382 | NM_017916   | PIH1D1   | PIH1 domain containing 1             | -0.053 | 0.964 | 7.18E-01 | 7.18E+01 |  |
| 8038393 | ---         | ---      | ---                                  | -0.065 | 0.956 | 3.94E-01 | 3.94E+01 |  |
| 8038395 | NM_015953   | NOSIP    | nitric oxide synthase interacting p  | -0.053 | 0.964 | 7.00E-01 | 7.00E+01 |  |
| 8038407 | NM_006270   | RRAS     | related RAS viral (r-ras) oncogene   | -0.048 | 0.967 | 6.14E-01 | 6.14E+01 |  |
| 8038416 | NM_001571   | IRF3     | interferon regulatory factor 3       | -0.075 | 0.949 | 4.04E-01 | 4.04E+01 |  |
| 8038427 | NM_021733   | TSKS     | testis-specific serine kinase substr | -0.035 | 0.976 | 7.81E-01 | 7.81E+01 |  |
| 8038443 | NM_025129   | FUZ      | fuzzy homolog (Drosophila)           | -0.039 | 0.973 | 7.23E-01 | 7.23E+01 |  |
| 8038458 | NM_007254   | PNKP     | polynucleotide kinase 3'-phosphat    | -0.042 | 0.972 | 6.95E-01 | 6.95E+01 |  |
| 8038477 | NM_032375   | AKT1S1   | AKT1 substrate 1 (proline-rich)      | -0.050 | 0.966 | 7.40E-01 | 7.40E+01 |  |
| 8038487 | NM_172374   | IL4I1    | interleukin 4 induced 1              | 0.155  | 1.113 | 2.30E-01 | 2.30E+01 |  |

|         |              |              |                                       |        |       |          |          |  |  |
|---------|--------------|--------------|---------------------------------------|--------|-------|----------|----------|--|--|
| 8038505 | NM_052884    | SIGLEC11     | sialic acid binding Ig-like lectin 11 | 0.075  | 1.054 | 4.04E-01 | 4.04E+01 |  |  |
| 8038515 | NM_016440    | VRK3         | vaccinia related kinase 3             | -0.030 | 0.979 | 8.08E-01 | 8.08E+01 |  |  |
| 8038540 | NM_004977    | KCNC3        | potassium voltage-gated channel,      | -0.004 | 0.998 | 9.85E-01 | 9.85E+01 |  |  |
| 8038547 | NR_002798    | NAP5B        | napsin B aspartic peptidase pseud     | 0.040  | 1.028 | 8.25E-01 | 8.25E+01 |  |  |
| 8038556 | NM_004851    | NAP5A        | napsin A aspartic peptidase           | 0.028  | 1.020 | 8.51E-01 | 8.51E+01 |  |  |
| 8038565 | ENST00000430 | C19orf63     | chromosome 19 open reading fram       | -0.071 | 0.952 | 4.73E-01 | 4.73E+01 |  |  |
| 8038571 | NM_138334    | JOSD2        | Josephin domain containing 2          | -0.019 | 0.987 | 9.09E-01 | 9.09E+01 |  |  |
| 8038577 | NM_00102465  | ASPDH        | aspartate dehydrogenase domain        | -0.031 | 0.978 | 7.89E-01 | 7.89E+01 |  |  |
| 8038584 | NM_00108045  | LRRC4B       | leucine rich repeat containing 4B     | 0.096  | 1.069 | 2.35E-01 | 2.35E+01 |  |  |
| 8038587 | NM_032298    | SYT3         | synaptotagmin III                     | -0.040 | 0.973 | 7.45E-01 | 7.45E+01 |  |  |
| 8038598 | NM_016148    | SHANK1       | SH3 and multiple ankyrin repeat d     | -0.012 | 0.991 | 9.46E-01 | 9.46E+01 |  |  |
| 8038624 | NM_199249    | C19orf48     | chromosome 19 open reading fram       | -0.005 | 0.997 | 9.85E-01 | 9.85E+01 |  |  |
| 8038633 | NM_002257    | KLK1         | kallikrein 1                          | 0.012  | 1.008 | 9.67E-01 | 9.67E+01 |  |  |
| 8038643 | NM_017509    | KLK15        | kallikrein-related peptidase 15       | 0.007  | 1.005 | 9.63E-01 | 9.63E+01 |  |  |
| 8038670 | NM_012427    | KLK5         | kallikrein-related peptidase 5        | -0.057 | 0.961 | 5.48E-01 | 5.48E+01 |  |  |
| 8038683 | NM_002774    | KLK6         | kallikrein-related peptidase 6        | -0.003 | 0.998 | 9.88E-01 | 9.88E+01 |  |  |
| 8038707 | NM_144505    | KLK8         | kallikrein-related peptidase 8        | -0.079 | 0.946 | 1.16E-01 | 1.16E+01 |  |  |
| 8038716 | NM_012315    | KLK9         | kallikrein-related peptidase 9        | -0.025 | 0.983 | 8.46E-01 | 8.46E+01 |  |  |
| 8038725 | NM_002776    | KLK10        | kallikrein-related peptidase 10       | -0.036 | 0.975 | 7.08E-01 | 7.08E+01 |  |  |
| 8038735 | NM_144947    | KLK11        | kallikrein-related peptidase 11       | -0.037 | 0.975 | 8.19E-01 | 8.19E+01 |  |  |
| 8038747 | NM_145894    | KLK12        | kallikrein-related peptidase 12       | -0.056 | 0.962 | 6.44E-01 | 6.44E+01 |  |  |
| 8038760 | NM_015596    | KLK13        | kallikrein-related peptidase 13       | 0.002  | 1.002 | 9.90E-01 | 9.90E+01 |  |  |
| 8038770 | NM_022046    | KLK14        | kallikrein-related peptidase 14       | 0.016  | 1.011 | 9.27E-01 | 9.27E+01 |  |  |
| 8038782 | NM_145232    | CTU1         | cytosolic thiouridylase subunit 1 h   | -0.029 | 0.980 | 8.85E-01 | 8.85E+01 |  |  |
| 8038785 | BC032383     | LOC147645    | hypothetical protein LOC147645        | -0.017 | 0.988 | 9.19E-01 | 9.19E+01 |  |  |
| 8038792 | NM_001985    | ETFB         | electron-transfer-flavoprotein, bet   | -0.003 | 0.998 | 9.89E-01 | 9.89E+01 |  |  |
| 8038804 | NM_152353    | CLDND2       | claudin domain containing 2           | 0.001  | 1.001 | 9.97E-01 | 9.97E+01 |  |  |
| 8038809 | NM_005601    | NGK7         | natural killer cell group 7 sequenc   | 0.145  | 1.106 | 7.33E-01 | 7.33E+01 |  |  |
| 8038815 | NM_030657    | LIM2         | lens intrinsic membrane protein 2     | 0.011  | 1.008 | 9.51E-01 | 9.51E+01 |  |  |
| 8038824 | NM_033130    | SIGLEC10     | sialic acid binding Ig-like lectin 10 | 0.186  | 1.137 | 2.26E-01 | 2.26E+01 |  |  |
| 8038839 | NM_014442    | SIGLEC8      | sialic acid binding Ig-like lectin 8  | 0.035  | 1.025 | 7.71E-01 | 7.71E+01 |  |  |
| 8038852 | NM_053003    | SIGLEC12     | sialic acid binding Ig-like lectin 12 | -0.074 | 0.950 | 4.25E-01 | 4.25E+01 |  |  |
| 8038861 | NM_001245    | SIGLEC6      | sialic acid binding Ig-like lectin 6  | 0.092  | 1.066 | 4.16E-01 | 4.16E+01 |  |  |
| 8038877 | NM_003830    | SIGLEC5      | sialic acid binding Ig-like lectin 5  | -0.007 | 0.995 | 9.85E-01 | 9.85E+01 |  |  |
| 8038890 | NM_001523    | HAS1         | hyaluronan synthase 1                 | -0.087 | 0.942 | 2.22E-01 | 2.22E+01 |  |  |
| 8038899 | NM_002029    | FPR1         | formyl peptide receptor 1             | 0.590  | 1.505 | 7.03E-02 | 7.03E+00 |  |  |
| 8038904 | NM_032679    | ZNF577       | zinc finger protein 577               | 0.161  | 1.118 | 3.74E-01 | 3.74E+01 |  |  |
| 8038913 | NM_023074    | ZNF649       | zinc finger protein 649               | 0.015  | 1.010 | 9.56E-01 | 9.56E+01 |  |  |
| 8038919 | NM_021632    | ZNF350       | zinc finger protein 350               | 0.044  | 1.031 | 8.44E-01 | 8.44E+01 |  |  |
| 8038942 | NM_014650    | ZNF432       | zinc finger protein 432               | -0.110 | 0.927 | 5.04E-01 | 5.04E+01 |  |  |
| 8038954 | NM_178523    | ZNF616       | zinc finger protein 616               | 0.041  | 1.029 | 8.99E-01 | 8.99E+01 |  |  |
| 8038962 | NM_00110265  | // ZNF836 // | zinc finger protein 836 // zinc fing  | 0.032  | 1.022 | 8.21E-01 | 8.21E+01 |  |  |
| 8038967 | NM_00110554  | ZNF83        | zinc finger protein 83                | 0.148  | 1.108 | 4.71E-01 | 4.71E+01 |  |  |
| 8038989 | NM_198457    | ZNF600       | zinc finger protein 600               | -0.114 | 0.924 | 5.14E-01 | 5.14E+01 |  |  |
| 8038993 | NM_006969    | ZNF28        | zinc finger protein 28                | 0.125  | 1.091 | 5.98E-01 | 5.98E+01 |  |  |
| 8038998 | NM_199132    | ZNF468       | zinc finger protein 468               | 0.089  | 1.064 | 7.77E-01 | 7.77E+01 |  |  |
| 8039010 | NM_018260    | ZNF701       | zinc finger protein 701               | 0.021  | 1.015 | 8.91E-01 | 8.91E+01 |  |  |
| 8039013 | NM_203307    | ZNF321       | zinc finger protein 321               | 0.035  | 1.025 | 8.70E-01 | 8.70E+01 |  |  |
| 8039034 | NM_00110260  | ZNF160       | zinc finger protein 160               | 0.036  | 1.025 | 8.67E-01 | 8.67E+01 |  |  |
| 8039068 | NM_021074    | NDUFV2       | NADH dehydrogenase (ubiquinone)       | -0.134 | 0.911 | 1.56E-01 | 1.56E+01 |  |  |
| 8039090 | ---          | ---          | ---                                   | -0.026 | 0.982 | 8.93E-01 | 8.93E+01 |  |  |
| 8039120 | NM_206818    | OSCAR        | osteoclast associated, immunoglo      | -0.059 | 0.960 | 4.79E-01 | 4.79E+01 |  |  |
| 8039131 | NM_013342    | TFPT         | TCF3 (E2A) fusion partner (in child   | -0.034 | 0.977 | 8.03E-01 | 8.03E+01 |  |  |
| 8039139 | NM_024316    | LENG1        | leukocyte receptor cluster (LRC) m    | 0.156  | 1.114 | 1.69E-01 | 1.69E+01 |  |  |
| 8039144 | NM_00114530  | TMC4         | transmembrane channel-like 4          | 0.015  | 1.011 | 9.22E-01 | 9.22E+01 |  |  |
| 8039166 | NM_024298    | MBOAT7       | membrane bound O-acyltransfera        | -0.007 | 0.995 | 9.64E-01 | 9.64E+01 |  |  |
| 8039180 | NM_00108144  | LILRB5       | leukocyte immunoglobulin-like rec     | 0.114  | 1.082 | 1.59E-01 | 1.59E+01 |  |  |
| 8039196 | NM_00108145  | LILRB3       | leukocyte immunoglobulin-like rec     | 0.270  | 1.206 | 3.18E-01 | 3.18E+01 |  |  |
| 8039226 | NM_006865    | LILRA3       | leukocyte immunoglobulin-like rec     | 0.255  | 1.193 | 6.11E-01 | 6.11E+01 |  |  |
| 8039246 | NM_012276    | LILRA4       | leukocyte immunoglobulin-like rec     | 0.097  | 1.070 | 3.27E-01 | 3.27E+01 |  |  |
| 8039257 | NM_002287    | LAIR1        | leukocyte-associated immunoglob       | 0.227  | 1.171 | 3.16E-01 | 3.16E+01 |  |  |
| 8039269 | NM_198988    | LENG9        | leukocyte receptor cluster (LRC) m    | -0.036 | 0.975 | 7.52E-01 | 7.52E+01 |  |  |
| 8039273 | NM_145057    | CDC42EP5     | CDC42 effector protein (Rho GTPa      | -0.015 | 0.990 | 8.97E-01 | 8.97E+01 |  |  |
| 8039280 | NM_00112725  | NLRP7        | NLR family, pyrin domain containi     | -0.160 | 0.895 | 2.94E-01 | 2.94E+01 |  |  |
| 8039294 | NM_00108389  | GP6          | glycoprotein VI (platelet)            | -0.097 | 0.935 | 3.21E-01 | 3.21E+01 |  |  |
| 8039306 | NM_00114597  | RDH13        | retinol dehydrogenase 13 (all-tran    | -0.153 | 0.899 | 5.53E-02 | 5.53E+00 |  |  |
| 8039316 | NM_017607    | PPP1R12C     | protein phosphatase 1, regulatory     | 0.000  | 1.000 | 9.99E-01 | 9.99E+01 |  |  |
| 8039340 | NM_003283    | TNNT1        | tropoin T type 1 (skeletal, slow)     | 0.134  | 1.097 | 5.04E-01 | 5.04E+01 |  |  |
| 8039362 | NM_178837    | C19orf51     | chromosome 19 open reading fram       | -0.045 | 0.970 | 7.00E-01 | 7.00E+01 |  |  |
| 8039378 | NM_003180    | SYT5         | synaptotagmin V                       | 0.015  | 1.010 | 9.18E-01 | 9.18E+01 |  |  |
| 8039409 | NM_173804    | TMEM86B      | transmembrane protein 86B             | -0.017 | 0.989 | 9.03E-01 | 9.03E+01 |  |  |
| 8039413 | NM_014931    | SAPS1        | SAPS domain family, member 1          | -0.029 | 0.980 | 8.48E-01 | 8.48E+01 |  |  |
| 8039440 | NM_012267    | HSPBP1       | HSPA (heat shock 70kDa) binding t     | -0.029 | 0.980 | 8.47E-01 | 8.47E+01 |  |  |
| 8039453 | NM_00108548  | TMEM150B     | transmembrane protein 150B            | 0.021  | 1.015 | 9.00E-01 | 9.00E+01 |  |  |
| 8039474 | NM_00114540  | FAM71E2      | family with sequence similarity 71    | -0.001 | 1.000 | 9.98E-01 | 9.98E+01 |  |  |
| 8039477 | BC031875     | FAM71E2      | family with sequence similarity 71    | -0.029 | 0.980 | 7.97E-01 | 7.97E+01 |  |  |
| 8039484 | NM_000641    | IL11         | interleukin 11                        | -0.022 | 0.985 | 8.75E-01 | 8.75E+01 |  |  |

|         |             |              |                                      |        |       |          |          |  |  |
|---------|-------------|--------------|--------------------------------------|--------|-------|----------|----------|--|--|
| 8039491 | NM_014501   | UBE2S        | ubiquitin-conjugating enzyme E2S     | -0.145 | 0.905 | 1.67E-01 | 1.67E+01 |  |  |
| 8039504 | NM_00114517 | hCG_2039146  | UPF0626 protein A                    | -0.040 | 0.972 | 7.27E-01 | 7.27E+01 |  |  |
| 8039511 | NM_024710   | ISOC2        | isochorismatase domain containin     | -0.022 | 0.985 | 8.78E-01 | 8.78E+01 |  |  |
| 8039520 | NM_00110140 | SBK2         | SH3-binding domain kinase family     | -0.096 | 0.935 | 4.13E-01 | 4.13E+01 |  |  |
| 8039524 | NM_152600   | ZNF579       | zinc finger protein 579              | -0.047 | 0.968 | 5.77E-01 | 5.77E+01 |  |  |
| 8039526 | NM_032836   | FIZ1         | FLT3-interacting zinc finger 1       | -0.020 | 0.986 | 9.02E-01 | 9.02E+01 |  |  |
| 8039530 | NM_203374   | ZNF784       | zinc finger protein 784              | -0.026 | 0.982 | 8.06E-01 | 8.06E+01 |  |  |
| 8039569 | NM_00100283 | ZNF787       | zinc finger protein 787              | -0.049 | 0.966 | 6.75E-01 | 6.75E+01 |  |  |
| 8039605 | NM_00100585 | ZNF835       | zinc finger protein 835              | -0.061 | 0.959 | 4.10E-01 | 4.10E+01 |  |  |
| 8039607 | NM_006210   | PEG3         | paternally expressed 3               | -0.048 | 0.967 | 6.51E-01 | 6.51E+01 |  |  |
| 8039655 | NM_00103965 | ZNF550       | zinc finger protein 550              | -0.021 | 0.985 | 9.12E-01 | 9.12E+01 |  |  |
| 8039664 | NM_017879   | ZNF416       | zinc finger protein 416              | -0.041 | 0.972 | 8.33E-01 | 8.33E+01 |  |  |
| 8039674 | NM_00108538 | ZNF154       | zinc finger protein 154              | -0.016 | 0.989 | 9.66E-01 | 9.66E+01 |  |  |
| 8039680 | NM_024833   | ZNF671       | zinc finger protein 671              | 0.001  | 1.001 | 9.96E-01 | 9.96E+01 |  |  |
| 8039692 | NM_00114498 | ZNF814       | zinc finger protein 814              | 0.062  | 1.044 | 8.78E-01 | 8.78E+01 |  |  |
| 8039695 | NM_152475   | ZNF417       | zinc finger protein 417              | -0.075 | 0.949 | 8.31E-01 | 8.31E+01 |  |  |
| 8039698 | NM_133460   | ZNF418       | zinc finger protein 418              | 0.010  | 1.007 | 9.78E-01 | 9.78E+01 |  |  |
| 8039706 | NM_005773   | ZNF256       | zinc finger protein 256              | 0.016  | 1.011 | 9.58E-01 | 9.58E+01 |  |  |
| 8039719 | NM_025027   | ZNF606       | zinc finger protein 606              | 0.050  | 1.035 | 6.37E-01 | 6.37E+01 |  |  |
| 8039730 | NM_023926   | ZSCAN18      | zinc finger and SCAN domain cont     | -0.032 | 0.978 | 7.88E-01 | 7.88E+01 |  |  |
| 8039740 | NM_024620   | ZNF329       | zinc finger protein 329              | -0.042 | 0.971 | 9.06E-01 | 9.06E+01 |  |  |
| 8039748 | NM_130786   | A1BG         | alpha-1-B glycoprotein               | -0.037 | 0.975 | 7.27E-01 | 7.27E+01 |  |  |
| 8039759 | NM_198458   | ZNF497       | zinc finger protein 497              | -0.070 | 0.952 | 4.02E-01 | 4.02E+01 |  |  |
| 8039766 | NM_00112973 | ZNF837       | zinc finger protein 837              | -0.032 | 0.978 | 7.96E-01 | 7.96E+01 |  |  |
| 8039769 | ---         | ---          | ---                                  | -0.020 | 0.986 | 9.12E-01 | 9.12E+01 |  |  |
| 8039771 | NM_003433   | ZNF132       | zinc finger protein 132              | 0.062  | 1.044 | 6.60E-01 | 6.60E+01 |  |  |
| 8039779 | NM_012254   | SLC27A5      | solute carrier family 27 (fatty acid | -0.006 | 0.996 | 9.73E-01 | 9.73E+01 |  |  |
| 8039791 | NM_032792   | ZBTB45       | zinc finger and BTB domain contai    | -0.004 | 0.997 | 9.85E-01 | 9.85E+01 |  |  |
| 8039796 | NM_014453   | CHMP2A       | chromatin modifying protein 2A       | 0.033  | 1.023 | 8.47E-01 | 8.47E+01 |  |  |
| 8039805 | NM_003969   | UBE2M        | ubiquitin-conjugating enzyme E2M     | -0.071 | 0.952 | 5.29E-01 | 5.29E+01 |  |  |
| 8039809 | NM_198055   | MZF1         | myeloid zinc finger 1                | 0.021  | 1.015 | 8.96E-01 | 8.96E+01 |  |  |
| 8039820 | NM_153443   | KIR3DL3      | killer cell immunoglobulin-like rec  | 0.008  | 1.005 | 9.83E-01 | 9.83E+01 |  |  |
| 8039829 | NM_014219   | KIR2DL2      | killer cell immunoglobulin-like rec  | 0.072  | 1.051 | 8.75E-01 | 8.75E+01 |  |  |
| 8039842 | NM_012312   | KIR2DS2      | killer cell immunoglobulin-like rec  | 0.105  | 1.075 | 8.07E-01 | 8.07E+01 |  |  |
| 8039859 | NM_002255   | KIR2DL4      | killer cell immunoglobulin-like rec  | 0.090  | 1.065 | 7.53E-01 | 7.53E+01 |  |  |
| 8039871 | NM_00108353 | KIR3DS1      | killer cell immunoglobulin-like rec  | 0.075  | 1.053 | 8.47E-01 | 8.47E+01 |  |  |
| 8039896 | NM_014512   | KIR2DS1      | killer cell immunoglobulin-like rec  | 0.104  | 1.075 | 7.77E-01 | 7.77E+01 |  |  |
| 8039905 | NM_020141   | TMEM167B     | transmembrane protein 167B           | 0.002  | 1.002 | 9.92E-01 | 9.92E+01 |  |  |
| 8039909 | NM_00103957 | CCNL2        | cyclin L2                            | -0.024 | 0.983 | 8.80E-01 | 8.80E+01 |  |  |
| 8039923 | NM_017900   | AURKAIP1     | aurora kinase A interacting protein  | -0.031 | 0.979 | 8.24E-01 | 8.24E+01 |  |  |
| 8039933 | NM_017761   | PNRC2        | proline-rich nuclear receptor coac   | 0.018  | 1.012 | 8.85E-01 | 8.85E+01 |  |  |
| 8039939 | NM_017971   | MRPL20       | mitochondrial ribosomal protein L    | 0.023  | 1.016 | 8.95E-01 | 8.95E+01 |  |  |
| 8039945 | ---         | ---          | ---                                  | 0.147  | 1.107 | 4.51E-01 | 4.51E+01 |  |  |
| 8039947 | NM_006625   | FUSIP1       | FUS interacting protein (serine/arg  | 0.012  | 1.008 | 9.53E-01 | 9.53E+01 |  |  |
| 8039961 | NR_024080   | ACP1         | acid phosphatase 1, soluble          | 0.074  | 1.053 | 4.74E-01 | 4.74E+01 |  |  |
| 8040018 | NM_016030   | TTC15        | tetratricopeptide repeat domain 1    | 0.130  | 1.094 | 2.47E-01 | 2.47E+01 |  |  |
| 8040036 | NM_001011   | RPS7         | ribosomal protein S7                 | -0.012 | 0.992 | 9.56E-01 | 9.56E+01 |  |  |
| 8040045 | NM_199235   | COLEC11      | collectin sub-family member 11       | 0.011  | 1.008 | 9.28E-01 | 9.28E+01 |  |  |
| 8040070 | NM_003108   | SOX11        | SRY (sex determining region Y)-box   | 0.002  | 1.001 | 9.88E-01 | 9.88E+01 |  |  |
| 8040080 | NM_080657   | RSAD2        | radical S-adenosyl methionine dor    | 0.472  | 1.387 | 5.35E-01 | 5.35E+01 |  |  |
| 8040090 | NM_014746   | RNF144A      | ring finger protein 144A             | -0.107 | 0.928 | 5.53E-01 | 5.53E+01 |  |  |
| 8040101 | ---         | ---          | ---                                  | 0.032  | 1.022 | 8.08E-01 | 8.08E+01 |  |  |
| 8040103 | NM_002166   | ID2          | inhibitor of DNA binding 2, domina   | -0.151 | 0.901 | 3.41E-01 | 3.41E+01 |  |  |
| 8040142 | NM_016207   | CPSF3        | cleavage and polyadenylation spe     | 0.004  | 1.003 | 9.89E-01 | 9.89E+01 |  |  |
| 8040163 | NM_00103961 | IAH1         | isoamyl acetate-hydrolyzing ester    | -0.140 | 0.907 | 1.50E-01 | 1.50E+01 |  |  |
| 8040171 | ---         | ---          | ---                                  | -0.142 | 0.906 | 5.72E-01 | 5.72E+01 |  |  |
| 8040211 | NM_003597   | KLF11        | Kruppel-like factor 11               | 0.186  | 1.137 | 3.07E-01 | 3.07E+01 |  |  |
| 8040221 | AF504647    | LOC100131506 | hypothetical LOC100131506            | -0.057 | 0.961 | 6.66E-01 | 6.66E+01 |  |  |
| 8040231 | BC093999    | C2orf48      | chromosome 2 open reading fram       | -0.055 | 0.962 | 6.60E-01 | 6.60E+01 |  |  |
| 8040238 | NM_134421   | HPCAL1       | hippocalcin-like 1                   | 0.050  | 1.035 | 6.81E-01 | 6.81E+01 |  |  |
| 8040249 | NM_005742   | PDIA6        | protein disulfide isomerase family   | 0.163  | 1.119 | 5.80E-02 | 5.80E+00 |  |  |
| 8040265 | NM_002236   | KCNF1        | potassium voltage-gated channel,     | -0.050 | 0.966 | 6.54E-01 | 6.54E+01 |  |  |
| 8040278 | NM_152391   | PQLC3        | PQ loop repeat containing 3          | 0.210  | 1.157 | 2.31E-02 | 2.31E+00 |  |  |
| 8040290 | ---         | ---          | ---                                  | -0.057 | 0.961 | 6.82E-01 | 6.82E+01 |  |  |
| 8040334 | ---         | ---          | ---                                  | 0.067  | 1.048 | 7.18E-01 | 7.18E+01 |  |  |
| 8040338 | ---         | ---          | ---                                  | 0.024  | 1.017 | 9.40E-01 | 9.40E+01 |  |  |
| 8040340 | NM_145693   | LPIN1        | lipin 1                              | -0.013 | 0.991 | 9.60E-01 | 9.60E+01 |  |  |
| 8040362 | XR_038318   | LOC729992    | similar to heat shock 70kD protein   | -0.080 | 0.946 | 6.66E-01 | 6.66E+01 |  |  |
| 8040365 | NM_021643   | TRIB2        | tribbles homolog 2 (Drosophila)      | 0.142  | 1.104 | 4.31E-01 | 4.31E+01 |  |  |
| 8040374 | NM_145175   | FAM84A       | family with sequence similarity 84   | -0.084 | 0.944 | 3.75E-01 | 3.75E+01 |  |  |
| 8040386 | NM_004939   | DDX1         | DEAD (Asp-Glu-Ala-Asp) box polyp     | -0.007 | 0.995 | 9.67E-01 | 9.67E+01 |  |  |
| 8040415 | ---         | ---          | ---                                  | 0.001  | 1.001 | 9.95E-01 | 9.95E+01 |  |  |
| 8040419 | NM_005378   | MYCN         | v-myc myelocytomatosis viral rela    | -0.032 | 0.978 | 8.37E-01 | 8.37E+01 |  |  |
| 8040456 | NM_00110556 | MSGN1        | mesogenin 1                          | -0.045 | 0.969 | 6.57E-01 | 6.57E+01 |  |  |
| 8040465 | ---         | ---          | ---                                  | -0.101 | 0.932 | 5.45E-01 | 5.45E+01 |  |  |
| 8040467 | ---         | ---          | ---                                  | 0.070  | 1.050 | 6.92E-01 | 6.92E+01 |  |  |
| 8040469 | AY189285    | LOC100131373 | hypothetical LOC100131373            | 0.075  | 1.053 | 4.54E-01 | 4.54E+01 |  |  |

|         |              |           |                                       |        |       |          |          |  |  |
|---------|--------------|-----------|---------------------------------------|--------|-------|----------|----------|--|--|
| 8040473 | NM_004040    | RHOB      | ras homolog gene family, member       | -0.002 | 0.998 | 9.89E-01 | 9.89E+01 |  |  |
| 8040477 | ---          | ---       | ---                                   | 0.060  | 1.043 | 7.86E-01 | 7.86E+01 |  |  |
| 8040479 | NM_182828    | GDF7      | growth differentiation factor 7       | -0.095 | 0.936 | 1.35E-01 | 1.35E+01 |  |  |
| 8040486 | ---          | ---       | ---                                   | -0.021 | 0.985 | 9.01E-01 | 9.01E+01 |  |  |
| 8040514 | ---          | ---       | ---                                   | -0.033 | 0.978 | 9.04E-01 | 9.04E+01 |  |  |
| 8040530 | NM_054033    | FKBP1B    | FK506 binding protein 1B, 12.6 kD     | -0.062 | 0.958 | 2.51E-01 | 2.51E+01 |  |  |
| 8040547 | ---          | ---       | ---                                   | 0.076  | 1.054 | 6.60E-01 | 6.60E+01 |  |  |
| 8040549 | ---          | ---       | ---                                   | 0.039  | 1.028 | 7.53E-01 | 7.53E+01 |  |  |
| 8040552 | NM_147223    | NCOA1     | nuclear receptor coactivator 1        | -0.074 | 0.950 | 6.40E-01 | 6.40E+01 |  |  |
| 8040578 | NM_024322    | CENPO     | centromere protein O                  | 0.117  | 1.085 | 4.66E-01 | 4.66E+01 |  |  |
| 8040587 | NM_014971    | EFR3B     | EFR3 homolog B (S. cerevisiae)        | -0.012 | 0.991 | 9.30E-01 | 9.30E+01 |  |  |
| 8040614 | ---          | ---       | ---                                   | 0.034  | 1.024 | 8.47E-01 | 8.47E+01 |  |  |
| 8040618 | NM_016131    | RAB10     | RAB10, member RAS oncogene fa         | 0.119  | 1.086 | 2.91E-01 | 2.91E+01 |  |  |
| 8040630 | ---          | ---       | ---                                   | 0.152  | 1.111 | 6.76E-01 | 6.76E+01 |  |  |
| 8040632 | ENST00000407 | FAM59B    | family with sequence similarity 59    | -0.076 | 0.949 | 4.42E-01 | 4.42E+01 |  |  |
| 8040639 | NM_000183    | HADHB     | hydroxyacyl-Coenzyme A dehydro        | 0.116  | 1.084 | 3.99E-01 | 3.99E+01 |  |  |
| 8040655 | NM_033505    | SELI      | selenoprotein I                       | 0.135  | 1.098 | 3.12E-01 | 3.12E+01 |  |  |
| 8040690 | NM_00110551  | C2orf70   | chromosome 2 open reading fram        | 0.010  | 1.007 | 9.69E-01 | 9.69E+01 |  |  |
| 8040695 | NM_002246    | KCNK3     | potassium channel, subfamily K, m     | 0.020  | 1.014 | 9.16E-01 | 9.16E+01 |  |  |
| 8040698 | NM_017877    | C2orf18   | chromosome 2 open reading fram        | 0.136  | 1.099 | 1.53E-01 | 1.53E+01 |  |  |
| 8040712 | NM_001809    | CENPA     | centromere protein A                  | 0.033  | 1.023 | 8.47E-01 | 8.47E+01 |  |  |
| 8040753 | NM_017727    | TMEM214   | transmembrane protein 214             | 0.033  | 1.023 | 8.52E-01 | 8.52E+01 |  |  |
| 8040774 | NM_021831    | AGBL5     | ATP/GTP binding protein-like 5        | -0.106 | 0.929 | 1.32E-01 | 1.32E+01 |  |  |
| 8040792 | NM_007046    | EMILIN1   | elastin microfibril interfacier 1     | -0.003 | 0.998 | 9.86E-01 | 9.86E+01 |  |  |
| 8040802 | NM_000221    | KHK       | ketoheokinase (fructokinase)          | -0.054 | 0.963 | 7.19E-01 | 7.19E+01 |  |  |
| 8040815 | NM_032604    | ABHD1     | abhydrolase domain containing 1       | -0.036 | 0.976 | 8.33E-01 | 8.33E+01 |  |  |
| 8040827 | NM_175769    | TCF23     | transcription factor 23               | -0.023 | 0.984 | 8.73E-01 | 8.73E+01 |  |  |
| 8040831 | NM_016085    | C2orf28   | chromosome 2 open reading fram        | -0.038 | 0.974 | 8.06E-01 | 8.06E+01 |  |  |
| 8040843 | NM_004341    | CAD       | carbamoyl-phosphate synthetase        | -0.060 | 0.960 | 5.30E-01 | 5.30E+01 |  |  |
| 8040908 | NM_014748    | SNX17     | sorting nexin 17                      | 0.058  | 1.041 | 6.83E-01 | 6.83E+01 |  |  |
| 8040927 | NM_013392    | NRBP1     | nuclear receptor binding protein 1    | -0.053 | 0.964 | 7.09E-01 | 7.09E+01 |  |  |
| 8040949 | NM_173853    | KRTCAP3   | keratinocyte associated protein 3     | -0.007 | 0.995 | 9.80E-01 | 9.80E+01 |  |  |
| 8040985 | NM_032434    | ZNF512    | zinc finger protein 512               | 0.117  | 1.084 | 3.16E-01 | 3.16E+01 |  |  |
| 8041000 | NM_007266    | GNP1      | GNP-loop GTPase 1                     | -0.013 | 0.991 | 9.60E-01 | 9.60E+01 |  |  |
| 8041015 | NM_018158    | SLC4A1AP  | solute carrier family 4 (anion exch   | -0.107 | 0.928 | 4.44E-01 | 4.44E+01 |  |  |
| 8041027 | NM_004891    | MRPL33    | mitochondrial ribosomal protein L     | -0.060 | 0.959 | 4.97E-01 | 4.97E+01 |  |  |
| 8041031 | NM_199193    | BRE       | brain and reproductive organ-expt     | 0.053  | 1.037 | 7.05E-01 | 7.05E+01 |  |  |
| 8041048 | NM_005253    | FOSL2     | FOS-like antigen 2                    | -0.256 | 0.838 | 2.02E-03 | 2.02E-01 |  |  |
| 8041122 | NM_002709    | PPP1CB    | protein phosphatase 1, catalytic su   | 0.022  | 1.015 | 8.30E-01 | 8.30E+01 |  |  |
| 8041149 | NM_015131    | WDR43     | WD repeat domain 43                   | 0.072  | 1.051 | 7.34E-01 | 7.34E+01 |  |  |
| 8041168 | NR_002741    | SNORD53   | small nucleolar RNA, C/D box 53       | 0.016  | 1.011 | 9.76E-01 | 9.76E+01 |  |  |
| 8041170 | ---          | ---       | ---                                   | 0.122  | 1.088 | 8.06E-01 | 8.06E+01 |  |  |
| 8041172 | NM_199280    | FAM179A   | family with sequence similarity 17    | 0.019  | 1.013 | 9.19E-01 | 9.19E+01 |  |  |
| 8041179 | NM_024692    | CLIP4     | CAP-GLY domain containing linker      | 0.123  | 1.089 | 3.39E-01 | 3.39E+01 |  |  |
| 8041197 | NM_00112740  | YPEL5     | yippee-like 5 (Drosophila)            | -0.085 | 0.943 | 3.38E-01 | 3.38E+01 |  |  |
| 8041204 | NR_002327    | SNORA10   | small nucleolar RNA, H/ACA box 1      | -0.099 | 0.934 | 5.38E-01 | 5.38E+01 |  |  |
| 8041206 | NM_030915    | LBH       | limb bud and heart development f      | -0.016 | 0.989 | 9.53E-01 | 9.53E+01 |  |  |
| 8041212 | NM_182551    | LCLAT1    | lysocardiolipin acyltransferase 1     | 0.104  | 1.075 | 5.81E-01 | 5.81E+01 |  |  |
| 8041223 | ---          | ---       | ---                                   | 0.018  | 1.012 | 9.50E-01 | 9.50E+01 |  |  |
| 8041225 | NM_014600    | EHD3      | EH-domain containing 3                | -0.023 | 0.984 | 9.19E-01 | 9.19E+01 |  |  |
| 8041236 | NM_014946    | SPAST     | spastin                               | -0.010 | 0.993 | 9.70E-01 | 9.70E+01 |  |  |
| 8041257 | NM_017964    | SLC30A6   | solute carrier family 30 (zinc trans  | -0.023 | 0.984 | 9.12E-01 | 9.12E+01 |  |  |
| 8041273 | NM_032312    | YIPF4     | Yip1 domain family, member 4          | 0.009  | 1.007 | 9.62E-01 | 9.62E+01 |  |  |
| 8041281 | ---          | ---       | ---                                   | 0.039  | 1.027 | 8.54E-01 | 8.54E+01 |  |  |
| 8041283 | NM_016252    | BIRC6     | baculoviral IAP repeat-containing     | 0.016  | 1.011 | 9.03E-01 | 9.03E+01 |  |  |
| 8041360 | NM_017735    | TTC27     | tetratricopeptide repeat domain 2     | 0.010  | 1.007 | 9.72E-01 | 9.72E+01 |  |  |
| 8041422 | NM_170672    | RASGRP3   | RAS guanyl releasing protein 3 (ca    | 0.327  | 1.254 | 7.18E-02 | 7.18E+00 |  |  |
| 8041447 | NM_016441    | CRIM1     | cysteine rich transmembrane BMR       | -0.165 | 0.892 | 5.28E-01 | 5.28E+01 |  |  |
| 8041487 | NM_174931    | CCDC75    | coiled-coil domain containing 75      | 0.073  | 1.052 | 5.65E-01 | 5.65E+01 |  |  |
| 8041495 | NM_144736    | C2orf56   | chromosome 2 open reading fram        | 0.016  | 1.011 | 9.49E-01 | 9.49E+01 |  |  |
| 8041508 | NM_012413    | QPCT      | glutaminy-peptide cyclotransferas     | 0.523  | 1.437 | 1.51E-01 | 1.51E+01 |  |  |
| 8041542 | NM_138801    | GALM      | galactose mutarotase (aldose 1-ep     | 0.059  | 1.042 | 8.00E-01 | 8.00E+01 |  |  |
| 8041553 | NM_024775    | GEMIN6    | gem (nuclear organelle) associated    | 0.100  | 1.072 | 5.51E-01 | 5.51E+01 |  |  |
| 8041570 | NM_152390    | TMEM178   | transmembrane protein 178             | -0.014 | 0.990 | 8.74E-01 | 8.74E+01 |  |  |
| 8041582 | NM_138370    | SGK493    | protein kinase-like protein SgK493    | -0.007 | 0.995 | 9.61E-01 | 9.61E+01 |  |  |
| 8041592 | NM_019063    | EML4      | echinoderm microtubule associat       | -0.042 | 0.971 | 7.53E-01 | 7.53E+01 |  |  |
| 8041617 | NM_020744    | MTA3      | metastasis associated 1 family, me    | 0.008  | 1.005 | 9.77E-01 | 9.77E+01 |  |  |
| 8041713 | NM_177968    | PPM1B     | protein phosphatase 1B (formerly      | 0.027  | 1.019 | 8.50E-01 | 8.50E+01 |  |  |
| 8041727 | NM_000341    | SLC3A1    | solute carrier family 3 (cystine, dib | 0.077  | 1.055 | 6.92E-01 | 6.92E+01 |  |  |
| 8041745 | NM_024766    | C2orf34   | chromosome 2 open reading fram        | -0.036 | 0.975 | 8.92E-01 | 8.92E+01 |  |  |
| 8041763 | NM_005400    | PRKCE     | protein kinase C, epsilon             | 0.143  | 1.104 | 1.53E-01 | 1.53E+01 |  |  |
| 8041781 | NM_001430    | EPAS1     | endothelial PAS domain protein 1      | 0.176  | 1.130 | 8.38E-02 | 8.38E+00 |  |  |
| 8041804 | NM_00114505  | LOC388946 | hypothetical LOC388946                | -0.040 | 0.973 | 8.05E-01 | 8.05E+01 |  |  |
| 8041808 | NM_012249    | RHOQ      | ras homolog gene family, member       | 0.030  | 1.021 | 8.78E-01 | 8.78E+01 |  |  |
| 8041813 | NM_014171    | CRIP1     | cysteine-rich PDZ-binding protein     | -0.032 | 0.978 | 8.44E-01 | 8.44E+01 |  |  |
| 8041820 | NM_014011    | SOC55     | suppressor of cytokine signaling 5    | -0.009 | 0.994 | 9.63E-01 | 9.63E+01 |  |  |
| 8041826 | NM_020458    | TTC7A     | tetratricopeptide repeat domain 7     | 0.019  | 1.013 | 8.76E-01 | 8.76E+01 |  |  |

|         |             |            |                                      |        |       |          |          |  |  |
|---------|-------------|------------|--------------------------------------|--------|-------|----------|----------|--|--|
| 8041867 | NM_000251   | MSH2       | mutS homolog 2, colon cancer, no     | 0.034  | 1.024 | 8.94E-01 | 8.94E+01 |  |  |
| 8041886 | AK026773    | LOC440863  | hypothetical gene supported by A     | 0.081  | 1.058 | 6.59E-01 | 6.59E+01 |  |  |
| 8041888 | NM_000179   | MSH6       | mutS homolog 6 (E. coli)             | -0.007 | 0.995 | 9.75E-01 | 9.75E+01 |  |  |
| 8041902 | NM_002158   | FOXN2      | forkhead box N2                      | 0.152  | 1.111 | 1.07E-01 | 1.07E+01 |  |  |
| 8041913 | NR_024188   | KLRAQ1     | KLRAQ motif containing 1             | 0.124  | 1.090 | 2.30E-01 | 2.30E+01 |  |  |
| 8041937 | AK128867    | FLJ46838   | FLJ46838 protein                     | 0.017  | 1.012 | 9.19E-01 | 9.19E+01 |  |  |
| 8041967 | NM_015701   | ERLEC1     | endoplasmic reticulum lectin 1       | 0.009  | 1.006 | 9.65E-01 | 9.65E+01 |  |  |
| 8041982 | NM_138448   | ACYP2      | acylphosphatase 2, muscle type       | -0.009 | 0.994 | 9.78E-01 | 9.78E+01 |  |  |
| 8041995 | NM_003128   | SPTBN1     | spectrin, beta, non-erythrocytic 1   | -0.014 | 0.990 | 9.68E-01 | 9.68E+01 |  |  |
| 8042038 | NR_002229   | RPL23AP32  | ribosomal protein L23a pseudogen     | -0.053 | 0.964 | 7.09E-01 | 7.09E+01 |  |  |
| 8042040 | NM_0103975  | EML6       | echinoderm microtubule associat      | 0.036  | 1.025 | 8.46E-01 | 8.46E+01 |  |  |
| 8042052 | NM_002954   | RPS27A     | ribosomal protein S27a               | -0.002 | 0.998 | 9.86E-01 | 9.86E+01 |  |  |
| 8042059 | NR_027258   | NCRNA00117 | non-protein coding RNA 117           | 0.091  | 1.065 | 5.01E-01 | 5.01E+01 |  |  |
| 8042066 | NM_080667   | CCDC104    | coiled-coil domain containing 104    | -0.234 | 0.850 | 1.24E-02 | 1.24E+00 |  |  |
| 8042086 | NM_006296   | VRK2       | vaccinia related kinase 2            | 0.188  | 1.139 | 3.69E-01 | 3.69E+01 |  |  |
| 8042107 | ---         | ---        | ---                                  | -0.109 | 0.927 | 4.44E-01 | 4.44E+01 |  |  |
| 8042109 | ---         | ---        | ---                                  | -0.049 | 0.966 | 8.36E-01 | 8.36E+01 |  |  |
| 8042119 | NM_022894   | PAPOLG     | poly(A) polymerase gamma             | -0.066 | 0.955 | 5.86E-01 | 5.86E+01 |  |  |
| 8042144 | NM_002908   | REL        | v-rel reticuloendotheliosis viral on | -0.060 | 0.960 | 7.48E-01 | 7.48E+01 |  |  |
| 8042157 | ---         | ---        | ---                                  | -0.054 | 0.963 | 9.16E-01 | 9.16E+01 |  |  |
| 8042161 | NM_002618   | PEX13      | peroxisomal biogenesis factor 13     | 0.055  | 1.039 | 8.27E-01 | 8.27E+01 |  |  |
| 8042195 | NM_152392   | AHS2       | AHA1, activator of heat shock 90k    | 0.047  | 1.033 | 7.09E-01 | 7.09E+01 |  |  |
| 8042207 | NM_152516   | COMMD1     | copper metabolism (Murr1) doma       | 0.115  | 1.083 | 5.58E-01 | 5.58E+01 |  |  |
| 8042211 | NM_006577   | B3GNT2     | UDP-GlcNAc:betaGal beta-1,3-N-a      | 0.134  | 1.097 | 1.56E-01 | 1.56E+01 |  |  |
| 8042219 | ---         | ---        | ---                                  | 0.097  | 1.069 | 8.37E-01 | 8.37E+01 |  |  |
| 8042221 | ---         | ---        | ---                                  | 0.053  | 1.038 | 6.80E-01 | 6.80E+01 |  |  |
| 8042251 | NM_014562   | OTX1       | orthodenticle homeobox 1             | -0.063 | 0.957 | 5.60E-01 | 5.60E+01 |  |  |
| 8042257 | ---         | ---        | ---                                  | -0.121 | 0.919 | 5.60E-01 | 5.60E+01 |  |  |
| 8042270 | NM_00100152 | UGP2       | UDP-glucose pyrophosphorylase 2      | 0.007  | 1.005 | 9.80E-01 | 9.80E+01 |  |  |
| 8042283 | NM_014181   | HSPC159    | galectin-related protein             | 0.040  | 1.028 | 9.27E-01 | 9.27E+01 |  |  |
| 8042291 | NM_203437   | AFTPH      | afthiphilin                          | 0.074  | 1.052 | 2.16E-01 | 2.16E+01 |  |  |
| 8042306 | ---         | ---        | ---                                  | 0.280  | 1.214 | 2.37E-02 | 2.37E+00 |  |  |
| 8042310 | NM_003038   | SLC1A4     | solute carrier family 1 (glutamate/  | -0.002 | 0.999 | 9.95E-01 | 9.95E+01 |  |  |
| 8042326 | NM_015147   | CEP68      | centrosomal protein 68kDa            | -0.068 | 0.954 | 5.15E-01 | 5.15E+01 |  |  |
| 8042333 | ---         | ---        | ---                                  | 0.003  | 1.002 | 9.90E-01 | 9.90E+01 |  |  |
| 8042335 | NM_003375   | VDAC2      | voltage-dependent anion channel      | -0.046 | 0.968 | 7.28E-01 | 7.28E+01 |  |  |
| 8042337 | NM_00100538 | ACTR2      | ARP2 actin-related protein 2 hom     | 0.092  | 1.066 | 3.04E-01 | 3.04E+01 |  |  |
| 8042381 | NM_020143   | PNQ1       | partner of NOB1 homolog (S. cere     | 0.081  | 1.058 | 5.49E-01 | 5.49E+01 |  |  |
| 8042413 | NM_138964   | PROKR1     | prokineticin receptor 1              | 0.011  | 1.008 | 9.54E-01 | 9.54E+01 |  |  |
| 8042416 | NM_014882   | ARHGAP25   | Rho GTPase activating protein 25     | 0.233  | 1.175 | 6.04E-02 | 6.04E+00 |  |  |
| 8042487 | NM_178439   | GMCL1      | germ cell-less homolog 1 (Drosoph    | -0.050 | 0.966 | 6.84E-01 | 6.84E+01 |  |  |
| 8042495 | NM_006857   | SNRNP27    | small nuclear ribonucleoprotein 27   | 0.020  | 1.014 | 9.00E-01 | 9.00E+01 |  |  |
| 8042501 | ---         | ---        | ---                                  | 0.128  | 1.093 | 6.59E-01 | 6.59E+01 |  |  |
| 8042503 | NM_002357   | MXD1       | MAX dimerization protein 1           | -0.030 | 0.979 | 9.60E-01 | 9.60E+01 |  |  |
| 8042513 | ---         | ---        | ---                                  | 0.024  | 1.017 | 8.41E-01 | 8.41E+01 |  |  |
| 8042515 | NM_006196   | PCBP1      | poly(rC) binding protein 1           | 0.040  | 1.028 | 7.25E-01 | 7.25E+01 |  |  |
| 8042519 | NM_016297   | PCYOX1     | prenylcysteine oxidase 1             | -0.183 | 0.881 | 1.84E-01 | 1.84E+01 |  |  |
| 8042530 | ---         | ---        | ---                                  | 0.004  | 1.003 | 9.86E-01 | 9.86E+01 |  |  |
| 8042532 | NM_012476   | VAX2       | ventral anterior homeobox 2          | -0.029 | 0.980 | 8.24E-01 | 8.24E+01 |  |  |
| 8042537 | NM_001692   | ATP6V1B1   | ATPase, H+ transporting, lysosoma    | -0.027 | 0.981 | 7.44E-01 | 7.44E+01 |  |  |
| 8042574 | NR_002822   | MGC72080   | MGC72080 pseudogene                  | -0.078 | 0.947 | 6.51E-01 | 6.51E+01 |  |  |
| 8042588 | NM_005791   | MPHOSPH10  | M-phase phosphoprotein 10 (U3 s      | -0.038 | 0.974 | 8.30E-01 | 8.30E+01 |  |  |
| 8042601 | NM_014497   | ZNF638     | zinc finger protein 638              | -0.031 | 0.979 | 8.17E-01 | 8.17E+01 |  |  |
| 8042696 | NM_003124   | SPR        | sepiapterin reductase (7,8-dihydro   | -0.066 | 0.955 | 6.77E-01 | 6.77E+01 |  |  |
| 8042701 | NM_004097   | EMX1       | empty spiracles homeobox 1           | -0.018 | 0.988 | 8.78E-01 | 8.78E+01 |  |  |
| 8042705 | NM_006062   | SMYD5      | SMYD family member 5                 | -0.002 | 0.999 | 9.92E-01 | 9.92E+01 |  |  |
| 8042720 | NM_006429   | CCT7       | chaperonin containing TCP1, subu     | -0.094 | 0.937 | 6.20E-01 | 6.20E+01 |  |  |
| 8042737 | NM_015120   | ALMS1      | Alstrom syndrome 1                   | -0.044 | 0.970 | 8.21E-01 | 8.21E+01 |  |  |
| 8042772 | NM_213622   | STAMBP     | STAM binding protein                 | -0.028 | 0.981 | 8.84E-01 | 8.84E+01 |  |  |
| 8042801 | NM_080916   | DGUOK      | deoxyguanosine kinase                | -0.049 | 0.967 | 7.62E-01 | 7.62E+01 |  |  |
| 8042811 | NM_144993   | TET3       | tet oncogene family member 3         | 0.018  | 1.012 | 9.21E-01 | 9.21E+01 |  |  |
| 8042825 | ---         | ---        | ---                                  | 0.036  | 1.025 | 7.56E-01 | 7.56E+01 |  |  |
| 8042843 | NM_032118   | WDR54      | WD repeat domain 54                  | -0.067 | 0.955 | 7.08E-01 | 7.08E+01 |  |  |
| 8042859 | NM_031288   | INO80B     | INO80 complex subunit B              | -0.049 | 0.966 | 7.34E-01 | 7.34E+01 |  |  |
| 8042867 | NM_012477   | WBP1       | WW domain binding protein 1          | -0.093 | 0.938 | 2.97E-01 | 2.97E+01 |  |  |
| 8042874 | NM_022492   | TTC31      | tetratricopeptide repeat domain 3    | 0.016  | 1.011 | 9.44E-01 | 9.44E+01 |  |  |
| 8042896 | NM_016170   | TLX2       | T-cell leukemia homeobox 2           | -0.079 | 0.947 | 3.01E-01 | 3.01E+01 |  |  |
| 8042905 | NM_013247   | HTRA2      | HtrA serine peptidase 2              | -0.020 | 0.986 | 9.12E-01 | 9.12E+01 |  |  |
| 8042917 | NM_001381   | DOK1       | docking protein 1, 62kDa (downst     | 0.099  | 1.071 | 3.07E-01 | 3.07E+01 |  |  |
| 8042925 | NM_004263   | SEMA4F     | sema domain, immunoglobulin do       | -0.028 | 0.980 | 7.92E-01 | 7.92E+01 |  |  |
| 8042942 | NM_000189   | HK2        | hexokinase 2                         | -0.177 | 0.885 | 5.71E-01 | 5.71E+01 |  |  |
| 8042953 | NM_019896   | POLE4      | polymerase (DNA-directed), epsilo    | 0.133  | 1.097 | 8.62E-02 | 8.62E+00 |  |  |
| 8042962 | NM_014763   | MRPL19     | mitochondrial ribosomal protein L    | 0.014  | 1.010 | 9.37E-01 | 9.37E+01 |  |  |
| 8042972 | ---         | ---        | ---                                  | -0.116 | 0.923 | 6.38E-01 | 6.38E+01 |  |  |
| 8043018 | ---         | ---        | ---                                  | -0.043 | 0.971 | 7.93E-01 | 7.93E+01 |  |  |
| 8043034 | ---         | ---        | ---                                  | 0.198  | 1.147 | 1.25E-01 | 1.25E+01 |  |  |
| 8043036 | AK293146    | DHFR       | dihydrofolate reductase              | 0.454  | 1.370 | 1.38E-01 | 1.38E+01 |  |  |



|         |              |            |                                       |        |       |          |          |  |
|---------|--------------|------------|---------------------------------------|--------|-------|----------|----------|--|
| 8043055 | NM_001370    | DNAH6      | dynein, axonemal, heavy chain 6       | -0.045 | 0.969 | 7.83E-01 | 7.83E+01 |  |
| 8043100 | NM_021103    | TMSB10     | thymosin beta 10                      | 0.199  | 1.148 | 3.63E-02 | 3.63E+00 |  |
| 8043105 | NM_020122    | KCMF1      | potassium channel modulatory fac      | 0.013  | 1.009 | 9.23E-01 | 9.23E+01 |  |
| 8043114 | NM_031283    | TCF7L1     | transcription factor 7-like 1 (T-cell | 0.001  | 1.001 | 9.93E-01 | 9.93E+01 |  |
| 8043131 | NM_00113502  | ELMOD3     | ELMO/CED-12 domain containing         | -0.013 | 0.991 | 9.55E-01 | 9.55E+01 |  |
| 8043155 | ---          | ---        | ---                                   | -0.146 | 0.904 | 2.74E-01 | 2.74E+01 |  |
| 8043157 | NM_198482    | SH2D6      | SH2 domain containing 6               | -0.086 | 0.942 | 2.28E-01 | 2.28E+01 |  |
| 8043187 | NM_005911    | MAT2A      | methionine adenosyltransferase II     | 0.139  | 1.101 | 9.91E-03 | 9.91E+01 |  |
| 8043209 | NM_016494    | RNF181     | ring finger protein 181               | 0.097  | 1.069 | 2.91E-01 | 2.91E+01 |  |
| 8043218 | NM_006590    | USP39      | ubiquitin specific peptidase 39       | -0.060 | 0.959 | 6.37E-01 | 6.37E+01 |  |
| 8043236 | NM_012483    | GNLY       | granulylin                            | 0.182  | 1.135 | 6.78E-01 | 6.78E+01 |  |
| 8043251 | NM_017952    | PTCD3      | Pentatricopeptide repeat domain       | -0.057 | 0.961 | 7.54E-01 | 7.54E+01 |  |
| 8043276 | NR_004378    | SNORD94    | small nucleolar RNA, C/D box 94       | 0.141  | 1.103 | 5.73E-01 | 5.73E+01 |  |
| 8043278 | NM_016622    | MRPL35     | mitochondrial ribosomal protein L     | 0.056  | 1.040 | 7.89E-01 | 7.89E+01 |  |
| 8043283 | NM_018433    | KDM3A      | lysine (K)-specific demethylase 3A    | -0.087 | 0.942 | 5.33E-01 | 5.33E+01 |  |
| 8043310 | NM_022780    | RMND5A     | required for meiotic nuclear divisi   | -0.070 | 0.953 | 7.16E-01 | 7.16E+01 |  |
| 8043320 | AK098018     | LOC400965  | hypothetical LOC400965                | -0.108 | 0.928 | 3.56E-01 | 3.56E+01 |  |
| 8043322 | NM_022662    | ANAPC1     | anaphase promoting complex sub        | -0.057 | 0.961 | 8.32E-01 | 8.32E+01 |  |
| 8043324 | NM_00102445  | RGPD1      | RANBP2-like and GRIP domain cor       | -0.080 | 0.946 | 5.29E-01 | 5.29E+01 |  |
| 8043347 | ---          | ---        | ---                                   | -0.016 | 0.989 | 9.64E-01 | 9.64E+01 |  |
| 8043349 | NM_022662    | ANAPC1     | anaphase promoting complex sub        | -0.058 | 0.960 | 8.63E-01 | 8.63E+01 |  |
| 8043363 | NR_024204    | NCRNA00152 | non-protein coding RNA 152            | 0.005  | 1.004 | 9.87E-01 | 9.87E+01 |  |
| 8043375 | ---          | ---        | ---                                   | -0.054 | 0.963 | 8.40E-01 | 8.40E+01 |  |
| 8043377 | NM_012477    | WBP1       | WW domain binding protein 1           | -0.108 | 0.928 | 4.59E-01 | 4.59E+01 |  |
| 8043393 | NM_018271    | THNSL2     | threonine synthase-like 2 (S. cerev   | -0.010 | 0.993 | 9.61E-01 | 9.61E+01 |  |
| 8043407 | NM_152670    | C2orf51    | chromosome 2 open reading fram        | 0.024  | 1.017 | 8.66E-01 | 8.66E+01 |  |
| 8043413 | NM_144563    | RPIA       | ribose 5-phosphate isomerase A        | -0.055 | 0.963 | 8.02E-01 | 8.02E+01 |  |
| 8043426 | ---          | ---        | ---                                   | 0.024  | 1.017 | 8.92E-01 | 8.92E+01 |  |
| 8043433 | ---          | ---        | ---                                   | 0.236  | 1.177 | 2.69E-03 | 2.69E-01 |  |
| 8043438 | BC093097     | IGKC       | immunoglobulin kappa constant         | 0.317  | 1.246 | 4.39E-03 | 4.39E-01 |  |
| 8043443 | ---          | ---        | ---                                   | 0.157  | 1.115 | 3.32E-01 | 3.32E+01 |  |
| 8043474 | ENST00000390 | LOC652493  | similar to Ig kappa chain V-I region  | 0.046  | 1.032 | 7.52E-01 | 7.52E+01 |  |
| 8043484 | ---          | ---        | ---                                   | 0.205  | 1.153 | 2.29E-02 | 2.29E+00 |  |
| 8043491 | NM_144705    | TEKT4      | tektin 4                              | 0.004  | 1.003 | 9.83E-01 | 9.83E+01 |  |
| 8043502 | ---          | ---        | ---                                   | -0.155 | 0.898 | 8.63E-01 | 8.63E+01 |  |
| 8043504 | NM_002371    | MAL        | mal, T-cell differentiation protein   | 0.152  | 1.111 | 5.10E-01 | 5.10E+01 |  |
| 8043512 | NM_021088    | ZNF2       | zinc finger protein 2                 | 0.010  | 1.007 | 9.63E-01 | 9.63E+01 |  |
| 8043522 | NM_144707    | PROM2      | prominin 2                            | -0.049 | 0.967 | 7.03E-01 | 7.03E+01 |  |
| 8043552 | NM_013434    | KCNIP3     | Kv channel interacting protein 3, c   | -0.041 | 0.972 | 7.05E-01 | 7.05E+01 |  |
| 8043564 | NM_016044    | FAHD2A     | fumarylacetoacetate hydrolase dd      | -0.045 | 0.970 | 8.37E-01 | 8.37E+01 |  |
| 8043570 | ---          | ---        | ---                                   | -0.082 | 0.945 | 2.72E-01 | 2.72E+01 |  |
| 8043585 | NM_004804    | CIAO1      | cytosolic iron-sulfur protein assem   | -0.057 | 0.961 | 6.44E-01 | 6.44E+01 |  |
| 8043597 | NM_178495    | ITPRIPL1   | inositol 1,4,5-triphosphate recept    | -0.097 | 0.935 | 2.77E-01 | 2.77E+01 |  |
| 8043602 | NM_015341    | NCAPH      | non-SMC condensin I complex, su       | -0.117 | 0.922 | 6.48E-01 | 6.48E+01 |  |
| 8043621 | NM_212481    | ARID5A     | AT rich interactive domain 5A (MR     | -0.090 | 0.940 | 2.30E-01 | 2.30E+01 |  |
| 8043630 | AY358167     | UNQ5814    | RFVG5814                              | -0.075 | 0.949 | 6.05E-01 | 6.05E+01 |  |
| 8043632 | NM_00111338  | FER1L5     | fer-1-like 5 (C. elegans)             | -0.043 | 0.971 | 7.19E-01 | 7.19E+01 |  |
| 8043639 | NM_00107740  | FER1L5     | fer-1-like 5 (C. elegans)             | -0.082 | 0.945 | 4.77E-01 | 4.77E+01 |  |
| 8043657 | NM_020184    | CNNM4      | cyclin M4                             | -0.067 | 0.955 | 6.56E-01 | 6.56E+01 |  |
| 8043666 | NM_017623    | CNNM3      | cyclin M3                             | -0.032 | 0.978 | 8.45E-01 | 8.45E+01 |  |
| 8043682 | ---          | ---        | ---                                   | -0.087 | 0.941 | 5.72E-01 | 5.72E+01 |  |
| 8043685 | ---          | ---        | ---                                   | 0.038  | 1.026 | 8.93E-01 | 8.93E+01 |  |
| 8043687 | AK304740     | ANKRD36    | ankyrin repeat domain 36              | 0.025  | 1.018 | 9.50E-01 | 9.50E+01 |  |
| 8043697 | NM_025190    | ANKRD36B   | ankyrin repeat domain 36B             | -0.020 | 0.986 | 9.44E-01 | 9.44E+01 |  |
| 8043718 | NM_001862    | COX5B      | cytochrome c oxidase subunit Vb       | 0.055  | 1.039 | 7.00E-01 | 7.00E+01 |  |
| 8043725 | NM_001079    | ZAP70      | zeta-chain (TCR) associated protei    | 0.041  | 1.028 | 7.80E-01 | 7.80E+01 |  |
| 8043743 | ---          | ---        | ---                                   | -0.225 | 0.856 | 9.35E-02 | 9.35E+00 |  |
| 8043745 | ENST00000429 | TMEM131    | transmembrane protein 131             | -0.026 | 0.982 | 8.80E-01 | 8.80E+01 |  |
| 8043782 | NM_001298    | CNGA3      | cyclic nucleotide gated channel al    | 0.021  | 1.015 | 8.97E-01 | 8.97E+01 |  |
| 8043791 | NM_00113422  | INPP4A     | inositol polyphosphate-4-phospha      | 0.102  | 1.073 | 3.38E-01 | 3.38E+01 |  |
| 8043820 | NM_014044    | UNC50      | unc-50 homolog (C. elegans)           | -0.050 | 0.966 | 7.75E-01 | 7.75E+01 |  |
| 8043848 | NM_145212    | MRPL30     | mitochondrial ribosomal protein L     | -0.023 | 0.984 | 9.48E-01 | 9.48E+01 |  |
| 8043861 | NM_015904    | EIF5B      | eukaryotic translation initiation fa  | -0.010 | 0.993 | 9.58E-01 | 9.58E+01 |  |
| 8043890 | NM_00101171  | NMS        | neuromedin S                          | -0.024 | 0.984 | 8.77E-01 | 8.77E+01 |  |
| 8043900 | ---          | ---        | ---                                   | -0.023 | 0.984 | 9.53E-01 | 9.53E+01 |  |
| 8043902 | NM_024065    | PDCL3      | phosducin-like 3                      | -0.037 | 0.975 | 8.36E-01 | 8.36E+01 |  |
| 8043909 | NM_002518    | NPAS2      | neuronal PAS domain protein 2         | -0.068 | 0.954 | 4.50E-01 | 4.50E+01 |  |
| 8043932 | NM_00109969  | RPL31      | ribosomal protein L31                 | -0.003 | 0.998 | 9.90E-01 | 9.90E+01 |  |
| 8043937 | NM_017546    | C2orf29    | chromosome 2 open reading fram        | 0.038  | 1.027 | 7.56E-01 | 7.56E+01 |  |
| 8043945 | NM_145686    | MAP4K4     | mitogen-activated protein kinase      | -0.172 | 0.887 | 3.03E-02 | 3.03E+00 |  |
| 8044049 | NM_003853    | IL18RAP    | interleukin 18 receptor accessory     | 0.139  | 1.101 | 7.93E-01 | 7.93E+01 |  |
| 8044109 | NM_006236    | POU3F3     | POU class 3 homeobox 3                | -0.012 | 0.992 | 9.40E-01 | 9.40E+01 |  |
| 8044111 | NM_182640    | MRPS9      | mitochondrial ribosomal protein S     | -0.108 | 0.928 | 3.93E-01 | 3.93E+01 |  |
| 8044127 | NM_024093    | C2orf49    | chromosome 2 open reading fram        | 0.102  | 1.073 | 4.34E-01 | 4.34E+01 |  |
| 8044133 | NM_003581    | NCK2       | NCK adaptor protein 2                 | -0.124 | 0.917 | 3.80E-01 | 3.80E+01 |  |
| 8044154 | NM_172099    | CD8B       | CD8b molecule                         | -0.106 | 0.929 | 4.34E-01 | 4.34E+01 |  |
| 8044161 | NM_182588    | RGPD4      | RANBP2-like and GRIP domain cor       | -0.068 | 0.954 | 6.00E-01 | 6.00E+01 |  |

|         |              |          |                                       |        |       |          |          |  |  |
|---------|--------------|----------|---------------------------------------|--------|-------|----------|----------|--|--|
| 8044189 | ---          | ---      | ---                                   | -0.016 | 0.989 | 9.12E-01 | 9.12E+01 |  |  |
| 8044236 | NM_181453    | GCC2     | GRIP and coiled-coil domain conta     | -0.040 | 0.973 | 7.77E-01 | 7.77E+01 |  |  |
| 8044258 | NM_004987    | LIMS1    | LIM and senescent cell antigen-lik    | 0.062  | 1.044 | 7.90E-01 | 7.90E+01 |  |  |
| 8044263 | NM_006267    | RANBP2   | RAN binding protein 2                 | -0.001 | 0.999 | 9.95E-01 | 9.95E+01 |  |  |
| 8044295 | NM_00109928  | SH3RF3   | SH3 domain containing ring finger     | 0.049  | 1.034 | 6.56E-01 | 6.56E+01 |  |  |
| 8044301 | NM_023016    | ANKRD57  | ankyrin repeat domain 57              | -0.204 | 0.868 | 1.20E-01 | 1.20E+01 |  |  |
| 8044304 | NM_00112336  | RGPD6    | RANBP2-like and GRIP domain con       | -0.088 | 0.941 | 4.68E-01 | 4.68E+01 |  |  |
| 8044333 | NM_004987    | LIMS1    | LIM and senescent cell antigen-lik    | 0.195  | 1.145 | 3.04E-01 | 3.04E+01 |  |  |
| 8044351 | CR590757     | RPL22P15 | ribosomal protein L22 pseudogene      | -0.054 | 0.963 | 6.72E-01 | 6.72E+01 |  |  |
| 8044375 | NM_138621    | BCL2L11  | BCL2-like 11 (apoptosis facilitator)  | 0.061  | 1.043 | 7.64E-01 | 7.64E+01 |  |  |
| 8044415 | ---          | ---      | ---                                   | 0.134  | 1.097 | 4.05E-01 | 4.05E+01 |  |  |
| 8044417 | NM_032824    | TMEM87B  | transmembrane protein 87B             | 0.200  | 1.149 | 1.54E-01 | 1.54E+01 |  |  |
| 8044440 | NM_153214    | FBLN7    | fibulin 7                             | -0.065 | 0.956 | 4.63E-01 | 4.63E+01 |  |  |
| 8044450 | NM_198581    | ZC3H6    | zinc finger CCCH-type containing 6    | 0.025  | 1.017 | 9.18E-01 | 9.18E+01 |  |  |
| 8044462 | NM_153712    | TTL      | tubulin tyrosine ligase               | 0.109  | 1.079 | 3.09E-01 | 3.09E+01 |  |  |
| 8044491 | NM_032309    | CHCHD5   | coiled-coil-helix-coiled-coil-helix d | -0.114 | 0.924 | 2.96E-01 | 2.96E+01 |  |  |
| 8044499 | NM_005415    | SLC20A1  | solute carrier family 20 (phosphat    | 0.035  | 1.025 | 8.60E-01 | 8.60E+01 |  |  |
| 8044548 | NM_014440    | IL1F6    | interleukin 1 family, member 6 (eg    | 0.065  | 1.046 | 5.87E-01 | 5.87E+01 |  |  |
| 8044552 | NM_173170    | IL1F5    | interleukin 1 family, member 5 (de    | -0.070 | 0.952 | 4.35E-01 | 4.35E+01 |  |  |
| 8044563 | NM_032556    | IL1F10   | interleukin 1 family, member 10 (t    | -0.006 | 0.996 | 9.80E-01 | 9.80E+01 |  |  |
| 8044574 | NM_173842    | IL1RN    | interleukin 1 receptor antagonist     | -0.245 | 0.844 | 6.61E-01 | 6.61E+01 |  |  |
| 8044584 | NM_012455    | PSD4     | pleckstrin and Sec7 domain conta      | -0.053 | 0.964 | 6.33E-01 | 6.33E+01 |  |  |
| 8044613 | NM_00114535  | CBWD1    | COBW domain containing 1              | 0.139  | 1.101 | 1.29E-01 | 1.29E+01 |  |  |
| 8044634 | NM_012184    | FOXD4L1  | forkhead box D4-like 1                | -0.062 | 0.958 | 3.18E-01 | 3.18E+01 |  |  |
| 8044640 | NM_021965    | PGM5     | phosphoglucomutase 5                  | -0.005 | 0.997 | 9.85E-01 | 9.85E+01 |  |  |
| 8044649 | NR_024077    | WASH2P   | WAS protein family homolog 2 pse      | -0.020 | 0.986 | 8.88E-01 | 8.88E+01 |  |  |
| 8044669 | NM_013412    | RABL2A   | RAB, member of RAS oncogene fa        | 0.032  | 1.022 | 8.63E-01 | 8.63E+01 |  |  |
| 8044682 | ---          | ---      | ---                                   | 0.061  | 1.043 | 8.03E-01 | 8.03E+01 |  |  |
| 8044686 | NM_005721    | ACTR3    | ARP3 actin-related protein 3 hom      | 0.087  | 1.062 | 3.63E-01 | 3.63E+01 |  |  |
| 8044731 | ---          | ---      | ---                                   | -0.049 | 0.967 | 8.18E-01 | 8.18E+01 |  |  |
| 8044745 | NM_006773    | DDX18    | DEAD (Asp-Glu-Ala-Asp) box polyp      | -0.005 | 0.996 | 9.76E-01 | 9.76E+01 |  |  |
| 8044760 | ---          | ---      | ---                                   | -0.031 | 0.979 | 8.33E-01 | 8.33E+01 |  |  |
| 8044764 | ---          | ---      | ---                                   | 0.067  | 1.048 | 5.53E-01 | 5.53E+01 |  |  |
| 8044766 | NM_016133    | INSIG2   | insulin induced gene 2                | -0.178 | 0.884 | 3.32E-01 | 3.32E+01 |  |  |
| 8044773 | NM_006770    | MARCO    | macrophage receptor with collage      | 0.074  | 1.053 | 5.15E-01 | 5.15E+01 |  |  |
| 8044793 | NM_182915    | STEAP3   | STEAP family member 3                 | -0.023 | 0.984 | 8.62E-01 | 8.62E+01 |  |  |
| 8044804 | NM_020548    | DBI      | diazepam binding inhibitor (GABA      | 0.008  | 1.006 | 9.78E-01 | 9.78E+01 |  |  |
| 8044813 | NM_183240    | TMEM37   | transmembrane protein 37              | -0.041 | 0.972 | 7.29E-01 | 7.29E+01 |  |  |
| 8044844 | NM_00110519  | TMEM177  | transmembrane protein 177             | 0.022  | 1.015 | 8.99E-01 | 8.99E+01 |  |  |
| 8044849 | NM_002830    | PTPN4    | protein tyrosine phosphatase, non     | 0.003  | 1.002 | 9.91E-01 | 9.91E+01 |  |  |
| 8044882 | NM_020909    | EPB41L5  | erythrocyte membrane protein ba       | -0.131 | 0.913 | 3.35E-01 | 3.35E+01 |  |  |
| 8044909 | ---          | ---      | ---                                   | -0.030 | 0.980 | 9.77E-01 | 9.77E+01 |  |  |
| 8044913 | ---          | ---      | ---                                   | 0.179  | 1.132 | 6.90E-01 | 6.90E+01 |  |  |
| 8044915 | ---          | ---      | ---                                   | -0.037 | 0.974 | 9.27E-01 | 9.27E+01 |  |  |
| 8044919 | NM_002881    | RALB     | v-ral simian leukemia viral oncoge    | 0.277  | 1.212 | 1.61E-01 | 1.61E+01 |  |  |
| 8044927 | NM_002193    | INHBB    | inhibin, beta B                       | -0.059 | 0.960 | 6.13E-01 | 6.13E+01 |  |  |
| 8044933 | NM_005270    | GLI2     | GLI family zinc finger 2              | -0.047 | 0.968 | 6.89E-01 | 6.89E+01 |  |  |
| 8044961 | NR_023343    | RNU4ATAC | RNA, U4atac small nuclear (U12-d      | -0.206 | 0.867 | 3.06E-01 | 3.06E+01 |  |  |
| 8044963 | ---          | ---      | ---                                   | -0.003 | 0.998 | 9.95E-01 | 9.95E+01 |  |  |
| 8044965 | NM_004622    | TSN      | translin                              | 0.059  | 1.042 | 6.92E-01 | 6.92E+01 |  |  |
| 8045009 | NM_002101    | GYPC     | glycophorin C (Gerbich blood grou     | 0.000  | 1.000 | 1.00E+00 | 1.00E+02 |  |  |
| 8045018 | NM_000312    | PROC     | protein C (inactivator of coagulat    | -0.009 | 0.994 | 9.53E-01 | 9.53E+01 |  |  |
| 8045030 | NM_00108052  | MYO7B    | myosin VIIb                           | 0.002  | 1.001 | 9.87E-01 | 9.87E+01 |  |  |
| 8045083 | NM_032740    | SFT2D3   | SFT2 domain containing 3              | 0.072  | 1.051 | 3.66E-01 | 3.66E+01 |  |  |
| 8045086 | ---          | ---      | ---                                   | -0.069 | 0.953 | 6.33E-01 | 6.33E+01 |  |  |
| 8045088 | ---          | ---      | ---                                   | 0.109  | 1.079 | 7.00E-01 | 7.00E+01 |  |  |
| 8045090 | NM_020120    | UGGT1    | UDP-glucose glycoprotein glucosyl     | 0.057  | 1.040 | 6.14E-01 | 6.14E+01 |  |  |
| 8045136 | NM_032144    | RAB6C    | RAB6C, member RAS oncogene fa         | -0.002 | 0.998 | 9.88E-01 | 9.88E+01 |  |  |
| 8045142 | NM_025029    | FAM128B  | family with sequence similarity 12    | -0.102 | 0.932 | 3.94E-01 | 3.94E+01 |  |  |
| 8045146 | AK024408     | FAM128B  | family with sequence similarity 12    | 0.025  | 1.017 | 8.66E-01 | 8.66E+01 |  |  |
| 8045148 | ENST00000427 | FAM128A  | family with sequence similarity 12    | 0.011  | 1.008 | 9.63E-01 | 9.63E+01 |  |  |
| 8045167 | ---          | ---      | ---                                   | 0.128  | 1.093 | 2.94E-01 | 2.94E+01 |  |  |
| 8045171 | NM_033416    | IMP4     | IMP4, U3 small nucleolar ribonuck     | -0.065 | 0.956 | 7.83E-01 | 7.83E+01 |  |  |
| 8045182 | NM_014369    | PTPN18   | protein tyrosine phosphatase, non     | 0.066  | 1.047 | 6.46E-01 | 6.46E+01 |  |  |
| 8045198 | NM_00107953  | CFC1B    | cripto, FRL-1, cryptic family 1B      | -0.065 | 0.956 | 4.16E-01 | 4.16E+01 |  |  |
| 8045208 | NM_00108353  | POTEE    | POTE ankyrin domain family, mem       | 0.003  | 1.002 | 9.85E-01 | 9.85E+01 |  |  |
| 8045216 | NM_207364    | GPR148   | G protein-coupled receptor 148        | -0.020 | 0.986 | 9.12E-01 | 9.12E+01 |  |  |
| 8045224 | NM_152698    | FAM123C  | family with sequence similarity 12    | -0.005 | 0.996 | 9.81E-01 | 9.81E+01 |  |  |
| 8045229 | NM_032995    | ARHGEF4  | Rho guanine nucleotide exchange       | -0.075 | 0.949 | 3.56E-01 | 3.56E+01 |  |  |
| 8045247 | NM_017958    | PLEKHB2  | pleckstrin homology domain conta      | 0.106  | 1.076 | 6.71E-01 | 6.71E+01 |  |  |
| 8045279 | ---          | ---      | ---                                   | -0.015 | 0.990 | 9.53E-01 | 9.53E+01 |  |  |
| 8045287 | ---          | ---      | ---                                   | -0.048 | 0.967 | 9.24E-01 | 9.24E+01 |  |  |
| 8045289 | NM_012249    | RHOQ     | ras homolog gene family, member       | 0.165  | 1.121 | 3.44E-01 | 3.44E+01 |  |  |
| 8045291 | NM_080386    | TUBA3D   | tubulin, alpha 3d                     | -0.001 | 0.999 | 9.95E-01 | 9.95E+01 |  |  |
| 8045301 | NM_017751    | SMPD4    | sphingomyelin phosphodiesterase       | -0.084 | 0.944 | 4.19E-01 | 4.19E+01 |  |  |
| 8045309 | NM_138770    | CCDC74A  | coiled-coil domain containing 74A     | -0.042 | 0.972 | 8.10E-01 | 8.10E+01 |  |  |
| 8045319 | ---          | ---      | ---                                   | -0.062 | 0.958 | 8.05E-01 | 8.05E+01 |  |  |

|         |                             |           |                                     |        |       |          |          |  |  |
|---------|-----------------------------|-----------|-------------------------------------|--------|-------|----------|----------|--|--|
| 8045321 | NM_00109977                 | POTEF     | POTE ankyrin domain family, mem     | 0.035  | 1.024 | 8.18E-01 | 8.18E+01 |  |  |
| 8045323 | NM_013310                   | C2orf27A  | chromosome 2 open reading fram      | -0.019 | 0.987 | 9.10E-01 | 9.10E+01 |  |  |
| 8045332 | ---                         | ---       | ---                                 | -0.105 | 0.930 | 4.73E-01 | 4.73E+01 |  |  |
| 8045347 | ---                         | ---       | ---                                 | 0.241  | 1.182 | 6.43E-01 | 6.43E+01 |  |  |
| 8045349 | NM_002410                   | MGAT5     | mannosyl (alpha-1,6-)-glycoprotei   | 0.017  | 1.012 | 9.56E-01 | 9.56E+01 |  |  |
| 8045381 | NM_058241                   | CCNT2     | cyclin T2                           | 0.045  | 1.032 | 7.23E-01 | 7.23E+01 |  |  |
| 8045398 | NM_012233                   | RAB3GAP1  | RAB3 GTPase activating protein su   | 0.117  | 1.085 | 3.75E-01 | 3.75E+01 |  |  |
| 8045423 | NR_002973                   | SNORA40   | small nucleolar RNA, H/ACA box 4    | 0.156  | 1.114 | 4.76E-01 | 4.76E+01 |  |  |
| 8045425 | NM_015361                   | R3HDM1    | R3H domain containing 1             | -0.019 | 0.987 | 9.15E-01 | 9.15E+01 |  |  |
| 8045453 | ---                         | ---       | ---                                 | 0.036  | 1.026 | 9.07E-01 | 9.07E+01 |  |  |
| 8045455 | NM_014607                   | UBXN4     | UBX domain protein 4                | -0.022 | 0.985 | 8.50E-01 | 8.50E+01 |  |  |
| 8045514 | NM_00100166                 | SPOPL     | speckle-type POZ protein-like       | 0.069  | 1.049 | 8.24E-01 | 8.24E+01 |  |  |
| 8045533 | ---                         | ---       | ---                                 | 0.245  | 1.185 | 7.99E-01 | 7.99E+01 |  |  |
| 8045539 | NM_003937                   | KYNU      | kynureninase (L-kynurenine hydro    | -0.418 | 0.748 | 6.46E-02 | 6.46E+00 |  |  |
| 8045563 | NM_018460                   | ARHGAP15  | Rho GTPase activating protein 15    | 0.106  | 1.076 | 5.09E-01 | 5.09E+01 |  |  |
| 8045604 | NM_018328                   | MBD5      | methyl-CpG binding domain prote     | 0.002  | 1.001 | 9.91E-01 | 9.91E+01 |  |  |
| 8045619 | NM_015630                   | EPC2      | enhancer of polycomb homolog 2      | -0.040 | 0.973 | 7.54E-01 | 7.54E+01 |  |  |
| 8045637 | NM_004522                   | KIF5C     | kinesin family member 5C            | -0.218 | 0.860 | 4.37E-01 | 4.37E+01 |  |  |
| 8045664 | NM_177964                   | LYPD6B    | LY6/PLAUR domain containing 6B      | 0.013  | 1.009 | 9.25E-01 | 9.25E+01 |  |  |
| 8045674 | NM_194317                   | LYPD6     | LY6/PLAUR domain containing 6       | 0.080  | 1.057 | 2.64E-01 | 2.64E+01 |  |  |
| 8045697 | NM_018151                   | RIF1      | RAP1 interacting factor homolog (   | -0.096 | 0.935 | 3.74E-01 | 3.74E+01 |  |  |
| 8045736 | NM_052905                   | FMNL2     | formin-like 2                       | 0.153  | 1.112 | 7.87E-01 | 7.87E+01 |  |  |
| 8045768 | NM_152522                   | ARL6IP6   | ADP-ribosylation-like factor 6 inte | -0.007 | 0.995 | 9.82E-01 | 9.82E+01 |  |  |
| 8045804 | ---                         | ---       | ---                                 | 0.118  | 1.085 | 8.72E-01 | 8.72E+01 |  |  |
| 8045814 | ---                         | ---       | ---                                 | 0.020  | 1.014 | 9.33E-01 | 9.33E+01 |  |  |
| 8045816 | NM_00108311                 | GPD2      | glycerol-3-phosphate dehydrogen     | 0.102  | 1.073 | 8.29E-01 | 8.29E+01 |  |  |
| 8045846 | ---                         | ---       | ---                                 | 0.078  | 1.056 | 7.56E-01 | 7.56E+01 |  |  |
| 8045857 | BC021739                    | LOC554201 | hypothetical LOC554201              | -0.053 | 0.964 | 7.53E-01 | 7.53E+01 |  |  |
| 8045860 | NM_003628                   | PKP4      | plakophilin 4                       | -0.018 | 0.988 | 9.54E-01 | 9.54E+01 |  |  |
| 8045882 | NM_00101792                 | DAPL1     | death associated protein-like 1     | 0.031  | 1.022 | 8.10E-01 | 8.10E+01 |  |  |
| 8045887 | NR_002822                   | MGC72080  | MGC72080 pseudogene                 | -0.034 | 0.977 | 9.04E-01 | 9.04E+01 |  |  |
| 8045919 | NM_022826                   | 40244     | membrane-associated ring finger     | -0.021 | 0.986 | 9.00E-01 | 9.00E+01 |  |  |
| 8045933 | NM_004180                   | TANK      | TRAF family member-associated N     | -0.134 | 0.911 | 3.24E-01 | 3.24E+01 |  |  |
| 8045946 | NM_005805                   | PSMD14    | proteasome (prosome, macropain      | -0.031 | 0.979 | 9.09E-01 | 9.09E+01 |  |  |
| 8045974 | NM_022058                   | SLC4A10   | solute carrier family 4, sodium bic | -0.108 | 0.928 | 7.89E-01 | 7.89E+01 |  |  |
| 8046003 | NM_012198                   | GCA       | grancalcin, EF-hand calcium bindi   | 0.359  | 1.283 | 1.10E-01 | 1.10E+01 |  |  |
| 8046048 | NM_024969                   | CSRNP3    | cysteine-serine-rich nuclear protei | -0.034 | 0.977 | 8.34E-01 | 8.34E+01 |  |  |
| 8046086 | NM_203463                   | LASS6     | LAG1 homolog, ceramide synthase     | 0.234  | 1.176 | 8.27E-02 | 8.27E+00 |  |  |
| 8046169 | NM_004792                   | PPIG      | peptidylprolyl isomerase G (cyclo   | -0.012 | 0.992 | 9.54E-01 | 9.54E+01 |  |  |
| 8046201 | NM_003142                   | SSB       | Sjogren syndrome antigen B (auto    | 0.062  | 1.044 | 5.34E-01 | 5.34E+01 |  |  |
| 8046213 | NM_172070                   | UBR3      | ubiquitin protein ligase E3 compo   | -0.069 | 0.953 | 6.78E-01 | 6.78E+01 |  |  |
| 8046276 | NM_00100384                 | SP5       | Sp5 transcription factor            | -0.078 | 0.947 | 3.20E-01 | 3.20E+01 |  |  |
| 8046279 | ---                         | ---       | ---                                 | -0.010 | 0.993 | 9.67E-01 | 9.67E+01 |  |  |
| 8046306 | NM_015530                   | GORASP2   | golgi reassembly stacking protein   | 0.038  | 1.027 | 7.61E-01 | 7.61E+01 |  |  |
| 8046346 | NM_003642                   | HAT1      | histone acetyltransferase 1         | -0.022 | 0.985 | 9.05E-01 | 9.05E+01 |  |  |
| 8046373 | NM_178120                   | DLX1      | distal-less homeobox 1              | -0.035 | 0.976 | 7.29E-01 | 7.29E+01 |  |  |
| 8046380 | NM_000210                   | ITGA6     | integrin, alpha 6                   | 0.398  | 1.318 | 1.99E-01 | 1.99E+01 |  |  |
| 8046408 | NM_002610                   | PDK1      | pyruvate dehydrogenase kinase, is   | 0.216  | 1.162 | 3.12E-01 | 3.12E+01 |  |  |
| 8046426 | ---                         | ---       | ---                                 | -0.006 | 0.996 | 9.77E-01 | 9.77E+01 |  |  |
| 8046461 | NM_133646                   | ZAK       | sterile alpha motif and leucine zip | -0.396 | 0.760 | 1.23E-01 | 1.23E+01 |  |  |
| 8046500 | ---                         | ---       | ---                                 | -0.025 | 0.982 | 8.70E-01 | 8.70E+01 |  |  |
| 8046502 | NM_024583                   | SCRN3     | secernin 3                          | 0.218  | 1.163 | 1.78E-01 | 1.78E+01 |  |  |
| 8046515 | NM_002107 // H3F3A // H3F3A | H3F3A     | H3 histone, family 3A // H3 histon  | 0.096  | 1.068 | 2.12E-01 | 2.12E+01 |  |  |
| 8046522 | ---                         | ---       | ---                                 | 0.008  | 1.006 | 9.85E-01 | 9.85E+01 |  |  |
| 8046524 | NM_000523                   | HOXD13    | homeobox D13                        | -0.022 | 0.985 | 8.67E-01 | 8.67E+01 |  |  |
| 8046542 | NM_014213                   | HOXD9     | homeobox D9                         | -0.022 | 0.985 | 8.30E-01 | 8.30E+01 |  |  |
| 8046546 | NM_019558                   | HOXD8     | homeobox D8                         | -0.058 | 0.961 | 6.91E-01 | 6.91E+01 |  |  |
| 8046555 | NM_014621                   | HOXD4     | homeobox D4                         | -0.023 | 0.984 | 8.70E-01 | 8.70E+01 |  |  |
| 8046564 | NM_024501                   | HOXD1     | homeobox D1                         | -0.027 | 0.981 | 8.18E-01 | 8.18E+01 |  |  |
| 8046573 | NR_027850                   | MTX2      | metaxin 2                           | 0.062  | 1.044 | 8.08E-01 | 8.08E+01 |  |  |
| 8046590 | NM_194247                   | HNRNPA3   | heterogeneous nuclear ribonucleo    | 0.028  | 1.020 | 7.17E-01 | 7.17E+01 |  |  |
| 8046604 | NM_003659                   | AGPS      | alkylglycerone phosphate synthas    | 0.145  | 1.106 | 3.41E-01 | 3.41E+01 |  |  |
| 8046628 | NM_152945                   | RBM45     | RNA binding motif protein 45        | 0.047  | 1.033 | 7.68E-01 | 7.68E+01 |  |  |
| 8046680 | NM_019091                   | PLEKHA3   | pleckstrin homology domain conta    | -0.009 | 0.994 | 9.78E-01 | 9.78E+01 |  |  |
| 8046685 | NM_182678                   | UBE2E3    | ubiquitin-conjugating enzyme E2E    | -0.001 | 0.999 | 9.98E-01 | 9.98E+01 |  |  |
| 8046695 | NM_000885                   | ITGA4     | integrin, alpha 4 (antigen CD49D, 4 | 0.294  | 1.226 | 5.48E-06 | 5.48E-04 |  |  |
| 8046726 | NM_00113044                 | SSFA2     | sperm specific antigen 2            | 0.179  | 1.132 | 1.54E-01 | 1.54E+01 |  |  |
| 8046755 | ---                         | ---       | ---                                 | -0.002 | 0.999 | 9.93E-01 | 9.93E+01 |  |  |
| 8046759 | NM_018981                   | DNAJC10   | DnaJ (Hsp40) homolog, subfamily     | 0.062  | 1.044 | 7.59E-01 | 7.59E+01 |  |  |
| 8046804 | NM_138285                   | NUP35     | nucleoporin 35kDa                   | -0.013 | 0.991 | 9.65E-01 | 9.65E+01 |  |  |
| 8046848 | NM_018471                   | ZC3H15    | zinc finger CCCH-type containing 3  | 0.026  | 1.018 | 8.62E-01 | 8.62E+01 |  |  |
| 8046895 | NM_177454                   | FAM171B   | family with sequence similarity 17  | -0.047 | 0.968 | 7.78E-01 | 7.78E+01 |  |  |
| 8046922 | NM_000090                   | COL3A1    | collagen, type III, alpha 1         | -0.064 | 0.956 | 3.92E-01 | 3.92E+01 |  |  |
| 8046975 | NM_032168                   | WDR75     | WD repeat domain 75                 | 0.018  | 1.013 | 9.55E-01 | 9.55E+01 |  |  |
| 8046997 | NM_019048                   | ASNSD1    | asparagine synthetase domain cor    | 0.025  | 1.018 | 9.07E-01 | 9.07E+01 |  |  |
| 8047038 | NM_000534                   | PMS1      | PMS1 postmeiotic segregation inc    | 0.065  | 1.046 | 7.71E-01 | 7.71E+01 |  |  |
| 8047059 | NM_031314                   | HNRNPC    | heterogeneous nuclear ribonucleo    | -0.050 | 0.966 | 5.98E-01 | 5.98E+01 |  |  |

|         |             |              |                                      |        |       |          |          |  |  |
|---------|-------------|--------------|--------------------------------------|--------|-------|----------|----------|--|--|
| 8047062 | NM_00104251 | C2orf88      | chromosome 2 open reading fram       | 0.152  | 1.111 | 1.50E-01 | 1.50E+01 |  |  |
| 8047078 | NM_017694   | MFSD6        | major facilitator superfamily doma   | 0.004  | 1.002 | 9.86E-01 | 9.86E+01 |  |  |
| 8047086 | NM_005966   | NAB1         | NGF1-A binding protein 1 (EGR1 bi    | -0.031 | 0.979 | 9.17E-01 | 9.17E+01 |  |  |
| 8047097 | NM_014905   | GLS          | glutaminase                          | -0.001 | 0.999 | 9.95E-01 | 9.95E+01 |  |  |
| 8047125 | ---         | ---          | ---                                  | 0.158  | 1.115 | 7.27E-01 | 7.27E+01 |  |  |
| 8047161 | NM_00103171 | OBFC2A       | oligonucleotide/oligosaccharide-b    | -0.002 | 0.999 | 9.96E-01 | 9.96E+01 |  |  |
| 8047174 | NM_00112725 | SLC39A10     | solute carrier family 39 (zinc trans | -0.071 | 0.952 | 7.00E-01 | 7.00E+01 |  |  |
| 8047213 | ---         | ---          | ---                                  | 0.113  | 1.081 | 8.33E-01 | 8.33E+01 |  |  |
| 8047215 | ---         | ---          | ---                                  | 0.116  | 1.084 | 6.51E-01 | 6.51E+01 |  |  |
| 8047217 | NM_025147   | COQ10B       | coenzyme Q10 homolog B (S. cere      | -0.011 | 0.992 | 9.63E-01 | 9.63E+01 |  |  |
| 8047223 | NM_002157   | HSPE1        | heat shock 10kDa protein 1 (chape    | -0.045 | 0.970 | 8.32E-01 | 8.32E+01 |  |  |
| 8047228 | NM_199482   | MOBK13       | MOB1, Mps One Binder kinase act      | -0.010 | 0.993 | 9.63E-01 | 9.63E+01 |  |  |
| 8047241 | ---         | ---          | ---                                  | 0.011  | 1.008 | 9.85E-01 | 9.85E+01 |  |  |
| 8047243 | NM_138395   | MARS2        | methionyl-tRNA synthetase 2, mit     | -0.008 | 0.994 | 9.71E-01 | 9.71E+01 |  |  |
| 8047248 | NM_00111466 | PLCL1        | phospholipase C-like 1               | 0.080  | 1.057 | 8.15E-01 | 8.15E+01 |  |  |
| 8047262 | NM_153689   | C2orf69      | chromosome 2 open reading fram       | 0.149  | 1.109 | 7.17E-02 | 7.17E+00 |  |  |
| 8047272 | NM_015535   | SPATS2L      | spermatogenesis associated, serin    | 0.263  | 1.200 | 4.91E-01 | 4.91E+01 |  |  |
| 8047286 | ---         | ---          | ---                                  | -0.039 | 0.973 | 8.89E-01 | 8.89E+01 |  |  |
| 8047339 | NR_026584   | BZW1L1       | basic leucine zipper and W2 doma     | -0.125 | 0.917 | 2.63E-01 | 2.63E+01 |  |  |
| 8047356 | NM_021824   | NIF3L1       | NIF3 NGG1 interacting factor 3-lik   | -0.199 | 0.871 | 5.56E-02 | 5.56E+00 |  |  |
| 8047372 | NM_002491   | NDUFB3       | NADH dehydrogenase (ubiquinone       | 0.082  | 1.058 | 6.83E-01 | 6.83E+01 |  |  |
| 8047379 | ---         | ---          | ---                                  | -0.084 | 0.943 | 6.56E-01 | 6.56E+01 |  |  |
| 8047381 | NM_003879   | CFLAR        | CASP8 and FADD-like apoptosis re     | -0.081 | 0.945 | 6.64E-01 | 6.64E+01 |  |  |
| 8047401 | ---         | ---          | ---                                  | 0.000  | 1.000 | 1.00E+00 | 1.00E+02 |  |  |
| 8047403 | NM_032977   | CASP10       | caspase 10, apoptosis-related cyst   | 0.309  | 1.239 | 3.06E-03 | 3.06E-01 |  |  |
| 8047419 | NM_001228   | CASP8        | caspase 8, apoptosis-related cyste   | -0.014 | 0.990 | 9.53E-01 | 9.53E+01 |  |  |
| 8047441 | ---         | ---          | ---                                  | 0.115  | 1.083 | 7.30E-01 | 7.30E+01 |  |  |
| 8047443 | NM_018571   | STRADB       | STE20-related kinase adaptor beta    | 0.052  | 1.037 | 8.47E-01 | 8.47E+01 |  |  |
| 8047518 | NM_015934   | NOP58        | NOP58 ribonucleoprotein homolo       | -0.118 | 0.922 | 4.16E-01 | 4.16E+01 |  |  |
| 8047538 | NM_001204   | BMPR2        | bone morphogenetic protein rece      | -0.093 | 0.938 | 6.16E-01 | 6.16E+01 |  |  |
| 8047565 | NM_173511   | FAM117B      | family with sequence similarity 11   | 0.107  | 1.077 | 5.79E-01 | 5.79E+01 |  |  |
| 8047635 | NM_000976   | RPL12        | ribosomal protein L12                | 0.020  | 1.014 | 9.27E-01 | 9.27E+01 |  |  |
| 8047641 | NM_177538   | CYP20A1      | cytochrome P450, family 20, subfa    | 0.069  | 1.049 | 5.83E-01 | 5.83E+01 |  |  |
| 8047659 | NM_005759   | ABI2         | abi-interactor 2                     | -0.099 | 0.933 | 4.32E-01 | 4.32E+01 |  |  |
| 8047677 | NM_006139   | CD28         | CD28 molecule                        | 0.083  | 1.060 | 8.30E-01 | 8.30E+01 |  |  |
| 8047702 | NM_012092   | ICOS         | inducible T-cell co-stimulator       | -0.204 | 0.868 | 5.15E-01 | 5.15E+01 |  |  |
| 8047736 | ---         | ---          | ---                                  | -0.031 | 0.979 | 8.04E-01 | 8.04E+01 |  |  |
| 8047738 | NM_201266   | NRP2         | neuropilin 2                         | 0.291  | 1.223 | 3.04E-01 | 3.04E+01 |  |  |
| 8047771 | NM_001959   | EEF1B2       | eukaryotic translation elongation f  | 0.030  | 1.021 | 8.69E-01 | 8.69E+01 |  |  |
| 8047778 | NR_002589   | SNORD51      | small nucleolar RNA, C/D box 51      | -0.155 | 0.898 | 4.06E-01 | 4.06E+01 |  |  |
| 8047784 | NM_020923   | ZDBF2        | zinc finger, DBF-type containing 2   | -0.152 | 0.900 | 7.10E-01 | 7.10E+01 |  |  |
| 8047815 | NM_00113619 | FASTKD2      | FAST kinase domains 2                | 0.043  | 1.030 | 8.24E-01 | 8.24E+01 |  |  |
| 8047839 | NM_004379   | CREB1        | cAMP responsive element binding      | 0.002  | 1.002 | 9.90E-01 | 9.90E+01 |  |  |
| 8047854 | NM_00114230 | CCNYL1       | cyclin Y-like 1                      | 0.245  | 1.185 | 1.09E-01 | 1.09E+01 |  |  |
| 8047865 | NM_015040   | PIKFYVE      | phosphoinositide kinase, FYVE fing   | 0.123  | 1.089 | 3.07E-01 | 3.07E+01 |  |  |
| 8047952 | NM_182587   | UNC80        | unc-80 homolog (C. elegans)          | -0.003 | 0.998 | 9.88E-01 | 9.88E+01 |  |  |
| 8047963 | ---         | ---          | ---                                  | 0.052  | 1.037 | 6.55E-01 | 6.55E+01 |  |  |
| 8048014 | NM_199229   | RPE          | ribulose-5-phosphate-3-epimerase     | 0.147  | 1.107 | 6.19E-02 | 6.19E+00 |  |  |
| 8048075 | ---         | ---          | ---                                  | -0.088 | 0.941 | 7.38E-01 | 7.38E+01 |  |  |
| 8048108 | ---         | ---          | ---                                  | 0.037  | 1.026 | 8.48E-01 | 8.48E+01 |  |  |
| 8048116 | ---         | ---          | ---                                  | 0.045  | 1.032 | 8.31E-01 | 8.31E+01 |  |  |
| 8048120 | NM_004044   | ATIC         | 5-aminoimidazole-4-carboxamide       | 0.073  | 1.052 | 7.14E-01 | 7.14E+01 |  |  |
| 8048141 | NM_00114231 | TMEM169      | transmembrane protein 169            | 0.001  | 1.000 | 9.98E-01 | 9.98E+01 |  |  |
| 8048146 | NM_021141   | XRCC5        | X-ray repair complementing defec     | -0.016 | 0.989 | 9.10E-01 | 9.10E+01 |  |  |
| 8048171 | AK125369    | DKFZp434H141 | hypothetical protein DKFZp434H1      | -0.070 | 0.952 | 7.59E-01 | 7.59E+01 |  |  |
| 8048175 | NM_014140   | SMARCA1      | SWI/SNF related, matrix associate    | 0.007  | 1.005 | 9.75E-01 | 9.75E+01 |  |  |
| 8048195 | NM_000998   | RPL37A       | ribosomal protein L37a               | -0.039 | 0.974 | 7.53E-01 | 7.53E+01 |  |  |
| 8048205 | NM_000597   | IGFBP2       | insulin-like growth factor binding   | -0.049 | 0.967 | 6.38E-01 | 6.38E+01 |  |  |
| 8048211 | NM_198483   | RUFY4        | RUN and FYVE domain containing       | 0.006  | 1.004 | 9.77E-01 | 9.77E+01 |  |  |
| 8048234 | NM_152862   | ARPC2        | actin related protein 2/3 complex,   | 0.030  | 1.021 | 8.59E-01 | 8.59E+01 |  |  |
| 8048249 | NM_00107719 | GPBAR1       | G protein-coupled bile acid recept   | -0.038 | 0.974 | 7.46E-01 | 7.46E+01 |  |  |
| 8048257 | NM_015488   | PNKD         | paroxysmal nonkinesigenic dyskin     | -0.070 | 0.953 | 5.39E-01 | 5.39E+01 |  |  |
| 8048272 | BC052750    | C2orf62      | chromosome 2 open reading fram       | -0.045 | 0.969 | 6.31E-01 | 6.31E+01 |  |  |
| 8048283 | NM_000578   | SLC11A1      | solute carrier family 11 (proton-co  | -0.304 | 0.810 | 4.97E-01 | 4.97E+01 |  |  |
| 8048304 | NM_021198   | CTDSP1       | CTD (carboxy-terminal domain, RN     | -0.026 | 0.982 | 7.97E-01 | 7.97E+01 |  |  |
| 8048340 | NM_005444   | RQCD1        | RCD1 required for cell differenti    | 0.007  | 1.005 | 9.78E-01 | 9.78E+01 |  |  |
| 8048350 | NM_032726   | PLCD4        | phospholipase C, delta 4             | -0.077 | 0.948 | 5.96E-01 | 5.96E+01 |  |  |
| 8048370 | NM_004328   | BCS1L        | BCS1-like (yeast)                    | -0.017 | 0.988 | 9.53E-01 | 9.53E+01 |  |  |
| 8048381 | NM_015690   | STK36        | serine/threonine kinase 36, fused    | -0.080 | 0.946 | 3.98E-01 | 3.98E+01 |  |  |
| 8048411 | NM_014640   | TTL4         | tubulin tyrosine ligase-like family, | -0.082 | 0.945 | 7.75E-01 | 7.75E+01 |  |  |
| 8048432 | NM_000784   | CYP27A1      | cytochrome P450, family 27, subfa    | 0.307  | 1.237 | 5.69E-01 | 5.69E+01 |  |  |
| 8048445 | NM_006522   | WNT6         | wingless-type MMTV integration s     | 0.006  | 1.004 | 9.75E-01 | 9.75E+01 |  |  |
| 8048452 | NM_025216   | WNT10A       | wingless-type MMTV integration s     | -0.009 | 0.994 | 9.54E-01 | 9.54E+01 |  |  |
| 8048460 | NM_003936   | CDK5R2       | cyclin-dependent kinase 5, regulat   | 0.006  | 1.004 | 9.76E-01 | 9.76E+01 |  |  |
| 8048466 | ---         | ---          | ---                                  | -0.056 | 0.962 | 8.83E-01 | 8.83E+01 |  |  |
| 8048468 | NM_024293   | FAM134A      | family with sequence similarity 13   | -0.036 | 0.975 | 6.93E-01 | 6.93E+01 |  |  |
| 8048478 | NM_138802   | ZFAND2B      | zinc finger, AN1-type domain 2B      | -0.024 | 0.984 | 8.21E-01 | 8.21E+01 |  |  |

|         |              |          |                                                                |        |       |          |          |  |  |
|---------|--------------|----------|----------------------------------------------------------------|--------|-------|----------|----------|--|--|
| 8048489 | NM_018089    | ANKZF1   | ankyrin repeat and zinc finger domain                          | 0.040  | 1.028 | 7.96E-01 | 7.96E+01 |  |  |
| 8048505 | NR_026909    | STK16    | serine/threonine kinase 16                                     | -0.029 | 0.980 | 8.75E-01 | 8.75E+01 |  |  |
| 8048518 | NR_003063    | TUBA4B   | tubulin, alpha 4b (pseudogene)                                 | 0.073  | 1.052 | 4.09E-01 | 4.09E+01 |  |  |
| 8048523 | NM_006736    | DNAJB2   | DnaJ (Hsp40) homolog, subfamily B                              | -0.053 | 0.964 | 6.70E-01 | 6.70E+01 |  |  |
| 8048541 | NM_001927    | DES      | desmin                                                         | 0.008  | 1.005 | 9.52E-01 | 9.52E+01 |  |  |
| 8048551 | NM_005876    | SPEG     | SPEG complex locus                                             | -0.016 | 0.989 | 8.82E-01 | 8.82E+01 |  |  |
| 8048595 | NM_013335    | GMPPA    | GDP-mannose pyrophosphorylase                                  | 0.096  | 1.069 | 4.43E-01 | 4.43E+01 |  |  |
| 8048628 | NM_00100520  | TMEM198  | transmembrane protein 198                                      | -0.014 | 0.990 | 9.30E-01 | 9.30E+01 |  |  |
| 8048639 | NM_002191    | INHBA    | inhibin, alpha                                                 | -0.018 | 0.988 | 8.93E-01 | 8.93E+01 |  |  |
| 8048647 | NM_052902    | STK11IP  | serine/threonine kinase 11 interacting protein                 | -0.015 | 0.989 | 9.23E-01 | 9.23E+01 |  |  |
| 8048673 | NM_201574    | SLC4A3   | solute carrier family 4, anion exchanger                       | -0.001 | 0.999 | 9.95E-01 | 9.95E+01 |  |  |
| 8048699 | ---          | ---      | ---                                                            | -0.039 | 0.974 | 7.76E-01 | 7.76E+01 |  |  |
| 8048703 | NM_032338    | LLPH     | LLP homolog, long-term synaptic facilitator                    | 0.039  | 1.027 | 7.87E-01 | 7.87E+01 |  |  |
| 8048712 | ---          | ---      | ---                                                            | -0.058 | 0.961 | 5.03E-01 | 5.03E+01 |  |  |
| 8048717 | NM_152386    | SGPP2    | sphingosine-1-phosphate phosphatase                            | -0.052 | 0.964 | 8.27E-01 | 8.27E+01 |  |  |
| 8048752 | NM_022915    | MRPL44   | mitochondrial ribosomal protein L44                            | 0.131  | 1.095 | 4.18E-01 | 4.18E+01 |  |  |
| 8048761 | ---          | ---      | ---                                                            | 0.108  | 1.077 | 7.47E-01 | 7.47E+01 |  |  |
| 8048772 | NM_032276    | RHBDD1   | rhomboid domain containing 1                                   | 0.051  | 1.036 | 7.97E-01 | 7.97E+01 |  |  |
| 8048782 | NM_000091    | COL4A3   | collagen, type IV, alpha 3 (Goodpasture antigen)               | 0.005  | 1.003 | 9.76E-01 | 9.76E+01 |  |  |
| 8048835 | NM_020194    | MFF      | mitochondrial fission factor                                   | 0.051  | 1.036 | 6.48E-01 | 6.48E+01 |  |  |
| 8048847 | NM_00113518  | AGFG1    | ArfGAP with FG repeats 1                                       | -0.016 | 0.989 | 9.43E-01 | 9.43E+01 |  |  |
| 8048898 | NM_007237    | SP140    | SP140 nuclear body protein                                     | 0.116  | 1.084 | 4.80E-01 | 4.80E+01 |  |  |
| 8048926 | NM_138402    | SP140L   | SP140 nuclear body protein-like                                | 0.050  | 1.035 | 7.53E-01 | 7.53E+01 |  |  |
| 8048940 | NM_00108039  | SP100    | SP100 nuclear antigen                                          | 0.024  | 1.017 | 9.15E-01 | 9.15E+01 |  |  |
| 8048976 | ---          | ---      | ---                                                            | -0.063 | 0.957 | 8.36E-01 | 8.36E+01 |  |  |
| 8048980 | NM_016289    | CAB39    | calcium binding protein 39                                     | 0.001  | 1.001 | 9.97E-01 | 9.97E+01 |  |  |
| 8048995 | NM_030926    | ITM2C    | integral membrane protein 2C                                   | -0.135 | 0.911 | 2.40E-01 | 2.40E+01 |  |  |
| 8049007 | NM_139073    | SPATA3   | spermatogenesis associated 3                                   | 0.026  | 1.018 | 8.63E-01 | 8.63E+01 |  |  |
| 8049016 | NM_002807    | PSMD1    | proteasome (prosome, macropain) activator subunit 1            | -0.096 | 0.936 | 5.75E-01 | 5.75E+01 |  |  |
| 8049042 | ---          | ---      | ---                                                            | -0.150 | 0.901 | 7.38E-01 | 7.38E+01 |  |  |
| 8049071 | ---          | ---      | ---                                                            | -0.101 | 0.933 | 3.95E-01 | 3.95E+01 |  |  |
| 8049073 | ---          | ---      | ---                                                            | 0.037  | 1.026 | 8.52E-01 | 8.52E+01 |  |  |
| 8049075 | NM_145236    | B3GNT7   | UDP-GlcNAc:betaGal beta-1,3-N-acetylglucosaminyl transferase 7 | 0.042  | 1.030 | 7.93E-01 | 7.93E+01 |  |  |
| 8049083 | ---          | ---      | ---                                                            | -0.031 | 0.979 | 8.53E-01 | 8.53E+01 |  |  |
| 8049088 | NM_022730    | COPS7B   | COP9 constitutive photomorphogenesis inducer 7B                | -0.070 | 0.953 | 6.02E-01 | 6.02E+01 |  |  |
| 8049097 | NM_152383    | DIS3L2   | DIS3 mitotic control homolog (S. cerevisiae)                   | -0.097 | 0.935 | 8.58E-02 | 8.58E+00 |  |  |
| 8049128 | NM_031313    | ALPLP2   | alkaline phosphatase, placental-like                           | -0.035 | 0.976 | 8.48E-01 | 8.48E+01 |  |  |
| 8049137 | NM_001631    | ALPI     | alkaline phosphatase, intestinal                               | -0.070 | 0.952 | 4.41E-01 | 4.41E+01 |  |  |
| 8049152 | NM_000751    | CHRNA5   | cholinergic receptor, nicotinic, delta 5                       | -0.049 | 0.966 | 6.57E-01 | 6.57E+01 |  |  |
| 8049166 | NM_005199    | CHRNA6   | cholinergic receptor, nicotinic, gamma 6                       | -0.044 | 0.970 | 5.99E-01 | 5.99E+01 |  |  |
| 8049180 | NM_004846    | EIF4E2   | eukaryotic translation initiation factor 4E2                   | 0.144  | 1.105 | 3.14E-01 | 3.14E+01 |  |  |
| 8049187 | NM_025202    | EFHD1    | EF-hand domain family, member 1                                | 0.013  | 1.009 | 9.49E-01 | 9.49E+01 |  |  |
| 8049195 | ---          | ---      | ---                                                            | 0.000  | 1.000 | 1.00E+00 | 1.00E+02 |  |  |
| 8049199 | NM_00110314  | GIGYF2   | GRB10 interacting GYF protein 2                                | -0.002 | 0.998 | 9.87E-01 | 9.87E+01 |  |  |
| 8049239 | AY358535     | C2orf82  | chromosome 2 open reading frame 82                             | -0.032 | 0.978 | 7.61E-01 | 7.61E+01 |  |  |
| 8049243 | NM_005383    | NEU2     | sialidase 2 (cytosolic sialidase)                              | -0.069 | 0.953 | 3.80E-01 | 3.80E+01 |  |  |
| 8049246 | NM_00101791  | INPP5D   | inositol polyphosphate-5-phosphatase                           | 0.029  | 1.020 | 8.80E-01 | 8.80E+01 |  |  |
| 8049271 | NM_030803    | ATG16L1  | ATG16 autophagy related 16-like 1                              | 0.039  | 1.028 | 8.41E-01 | 8.41E+01 |  |  |
| 8049297 | NR_003008    | SCARNA5  | small Cajal body-specific RNA 5                                | -0.041 | 0.972 | 8.98E-01 | 8.98E+01 |  |  |
| 8049299 | NR_003006    | SCARNA6  | small Cajal body-specific RNA 6                                | 0.076  | 1.054 | 7.68E-01 | 7.68E+01 |  |  |
| 8049317 | NM_152879    | DGKD     | diacylglycerol kinase, delta 130kDa                            | 0.081  | 1.058 | 6.04E-01 | 6.04E+01 |  |  |
| 8049435 | NM_014521    | SH3BP4   | SH3-domain binding protein 4                                   | -0.018 | 0.987 | 9.02E-01 | 9.02E+01 |  |  |
| 8049448 | NM_00103713  | AGAP1    | ArfGAP with GTPase domain, ankyrin repeat                      | -0.065 | 0.956 | 7.45E-01 | 7.45E+01 |  |  |
| 8049478 | NM_198189    | COPS8    | COP9 constitutive photomorphogenesis inducer 8                 | -0.013 | 0.991 | 9.64E-01 | 9.64E+01 |  |  |
| 8049487 | NM_024101    | MLPH     | melanophilin                                                   | 0.037  | 1.026 | 8.01E-01 | 8.01E+01 |  |  |
| 8049509 | NM_015893    | PRLH     | prolactin releasing hormone                                    | -0.012 | 0.992 | 9.43E-01 | 9.43E+01 |  |  |
| 8049512 | NM_00113755  | LRRFIP1  | leucine rich repeat (in FHL) interacting protein 1             | 0.003  | 1.002 | 9.88E-01 | 9.88E+01 |  |  |
| 8049528 | NM_00113755  | LRRFIP1  | leucine rich repeat (in FHL) interacting protein 1             | -0.003 | 0.998 | 9.91E-01 | 9.91E+01 |  |  |
| 8049530 | NM_00113755  | LRRFIP1  | leucine rich repeat (in FHL) interacting protein 1             | -0.060 | 0.960 | 7.73E-01 | 7.73E+01 |  |  |
| 8049532 | NM_00113755  | LRRFIP1  | leucine rich repeat (in FHL) interacting protein 1             | 0.043  | 1.030 | 9.44E-01 | 9.44E+01 |  |  |
| 8049534 | NM_00113755  | LRRFIP1  | leucine rich repeat (in FHL) interacting protein 1             | 0.145  | 1.105 | 6.18E-01 | 6.18E+01 |  |  |
| 8049536 | NM_00113755  | LRRFIP1  | leucine rich repeat (in FHL) interacting protein 1             | -0.002 | 0.999 | 9.90E-01 | 9.90E+01 |  |  |
| 8049538 | NM_00113755  | LRRFIP1  | leucine rich repeat (in FHL) interacting protein 1             | -0.031 | 0.978 | 7.60E-01 | 7.60E+01 |  |  |
| 8049540 | NM_00113755  | LRRFIP1  | leucine rich repeat (in FHL) interacting protein 1             | 0.271  | 1.206 | 3.19E-01 | 3.19E+01 |  |  |
| 8049542 | NM_00113755  | LRRFIP1  | leucine rich repeat (in FHL) interacting protein 1             | 0.028  | 1.020 | 9.63E-01 | 9.63E+01 |  |  |
| 8049544 | NM_00113755  | LRRFIP1  | leucine rich repeat (in FHL) interacting protein 1             | 0.144  | 1.105 | 3.42E-01 | 3.42E+01 |  |  |
| 8049567 | NM_005855    | RAMP1    | receptor (G protein-coupled) activator protein 1               | -0.016 | 0.989 | 9.16E-01 | 9.16E+01 |  |  |
| 8049574 | NM_080678    | UBE2F    | ubiquitin-conjugating enzyme E2F                               | 0.196  | 1.146 | 2.65E-01 | 2.65E+01 |  |  |
| 8049582 | NM_016510    | SCLY     | selenocysteine lyase                                           | 0.021  | 1.015 | 8.61E-01 | 8.61E+01 |  |  |
| 8049598 | NM_194312    | ESPNL    | espin-like                                                     | -0.014 | 0.990 | 9.24E-01 | 9.24E+01 |  |  |
| 8049610 | NM_198582    | KLHL30   | kelch-like 30 (Drosophila)                                     | -0.045 | 0.969 | 7.52E-01 | 7.52E+01 |  |  |
| 8049620 | ENST00000408 | FAM132B  | family with sequence similarity 132, member B                  | 0.000  | 1.000 | 1.00E+00 | 1.00E+02 |  |  |
| 8049635 | NM_015650    | TRAF3IP1 | TNF receptor-associated factor 3 interacting protein 1         | -0.166 | 0.891 | 2.06E-02 | 2.06E+00 |  |  |
| 8049657 | NM_00104044  | ASB1     | ankyrin repeat and SOCS box-containing protein 1               | 0.003  | 1.002 | 9.87E-01 | 9.87E+01 |  |  |
| 8049670 | NM_002081    | GPC1     | glypican 1                                                     | -0.053 | 0.964 | 6.27E-01 | 6.27E+01 |  |  |
| 8049682 | ---          | ---      | ---                                                            | -0.008 | 0.994 | 9.67E-01 | 9.67E+01 |  |  |
| 8049684 | NM_00103357  | DUSP28   | dual specificity phosphatase 28                                | 0.091  | 1.065 | 3.30E-01 | 3.30E+01 |  |  |

|         |              |              |                                     |        |       |          |          |  |
|---------|--------------|--------------|-------------------------------------|--------|-------|----------|----------|--|
| 8049689 | NM_018226    | RNPEPL1      | arginyl aminopeptidase (aminope     | 0.002  | 1.001 | 9.91E-01 | 9.91E+01 |  |
| 8049702 | NM_023083    | CAPN10       | calpain 10                          | -0.007 | 0.995 | 9.52E-01 | 9.52E+01 |  |
| 8049722 | NM_005301    | GPR35        | G protein-coupled receptor 35       | -0.061 | 0.959 | 5.74E-01 | 5.74E+01 |  |
| 8049729 | NM_198998    | AQP12A       | aquaporin 12A                       | -0.014 | 0.990 | 8.99E-01 | 8.99E+01 |  |
| 8049737 | NM_000030    | AGXT         | alanine-glyoxylate aminotransfera   | -0.016 | 0.989 | 9.18E-01 | 9.18E+01 |  |
| 8049752 | NM_00108043  | SNED1        | sushi, nidogen and EGF-like domai   | -0.073 | 0.951 | 6.19E-01 | 6.19E+01 |  |
| 8049784 | NM_002712    | PPP1R7       | protein phosphatase 1, regulatory   | 0.022  | 1.016 | 9.11E-01 | 9.11E+01 |  |
| 8049799 | NM_00100189  | ANO7         | anoctamin 7                         | -0.015 | 0.990 | 9.10E-01 | 9.10E+01 |  |
| 8049825 | NM_005336    | HDLBP        | high density lipoprotein binding pr | 0.023  | 1.016 | 9.44E-01 | 9.44E+01 |  |
| 8049827 | NM_00100849  | 40423        | septin 2                            | -0.011 | 0.992 | 9.57E-01 | 9.57E+01 |  |
| 8049847 | NM_014808    | FARP2        | FERM, RhoGEF and pleckstrin dom     | 0.050  | 1.035 | 6.94E-01 | 6.94E+01 |  |
| 8049876 | NM_032515    | BOK          | BCL2-related ovarian killer         | 0.002  | 1.001 | 9.90E-01 | 9.90E+01 |  |
| 8049888 | NM_013325    | ATG4B        | ATG4 autophagy related 4 homolo     | 0.014  | 1.010 | 9.49E-01 | 9.49E+01 |  |
| 8049906 | NM_032329    | ING5         | inhibitor of growth family, membe   | 0.003  | 1.002 | 9.86E-01 | 9.86E+01 |  |
| 8049919 | NM_152783    | D2HGDH       | D-2-hydroxyglutarate dehydrogen     | -0.069 | 0.954 | 2.61E-01 | 2.61E+01 |  |
| 8049934 | NM_022134    | GAL3ST2      | galactose-3-O-sulfotransferase 2    | -0.011 | 0.993 | 9.16E-01 | 9.16E+01 |  |
| 8049942 | NM_080741    | NEU4         | sialidase 4                         | -0.020 | 0.986 | 8.06E-01 | 8.06E+01 |  |
| 8049950 | AK094921     | LOC100131763 | hypothetical LOC100131763           | -0.078 | 0.947 | 4.88E-01 | 4.88E+01 |  |
| 8049952 | NM_173821    | C2orf85      | chromosome 2 open reading fram      | -0.052 | 0.965 | 5.49E-01 | 5.49E+01 |  |
| 8049959 | AK123321     | FLJ41327     | FLJ41327 protein                    | -0.079 | 0.947 | 8.34E-01 | 8.34E+01 |  |
| 8049961 | NM_183421    | FBXO25       | F-box protein 25                    | 0.029  | 1.020 | 9.04E-01 | 9.04E+01 |  |
| 8049963 | BC032332     | PCMTD2       | protein-L-isoaspartate (D-aspartat  | -0.016 | 0.989 | 9.61E-01 | 9.61E+01 |  |
| 8049965 | AK302544     | FAM110C      | family with sequence similarity 11  | -0.105 | 0.930 | 1.27E-01 | 1.27E+01 |  |
| 8049969 | NM_015677    | SH3YL1       | SH3 domain containing, Ysc84-like   | 0.022  | 1.015 | 9.24E-01 | 9.24E+01 |  |
| 8049990 | NM_00100291  | FAM150B      | family with sequence similarity 15  | -0.046 | 0.969 | 6.38E-01 | 6.38E+01 |  |
| 8049998 | NM_152834    | TMEM18       | transmembrane protein 18            | -0.029 | 0.980 | 8.98E-01 | 8.98E+01 |  |
| 8050007 | NM_012293    | PXDN         | peroxidasin homolog (Drosophila)    | -0.055 | 0.963 | 6.80E-01 | 6.80E+01 |  |
| 8050031 | NM_015025    | MYT1L        | myelin transcription factor 1-like  | -0.051 | 0.965 | 5.23E-01 | 5.23E+01 |  |
| 8050060 | NM_003310    | TSSC1        | tumor suppressing subtransferabl    | 0.008  | 1.005 | 9.77E-01 | 9.77E+01 |  |
| 8050071 | NM_018269    | AD11         | acireductone dioxygenase 1          | 0.037  | 1.026 | 8.88E-01 | 8.88E+01 |  |
| 8050079 | NM_002936    | RNASEH1      | ribonuclease H1                     | 0.025  | 1.018 | 9.08E-01 | 9.08E+01 |  |
| 8050089 | BC113076     | TMSL2        | thymosin-like 2 (pseudogene)        | -0.028 | 0.981 | 7.62E-01 | 7.62E+01 |  |
| 8050093 | ---          | ---          | ---                                 | -0.047 | 0.968 | 7.97E-01 | 7.97E+01 |  |
| 8050095 | AK124409     | FLJ42418     | FLJ42418 protein                    | -0.097 | 0.935 | 6.24E-01 | 6.24E+01 |  |
| 8050102 | NM_207315    | CMPK2        | cytidine monophosphate (UMP-Ch      | -0.037 | 0.974 | 9.47E-01 | 9.47E+01 |  |
| 8050113 | AK125905     | LOC100129581 | hypothetical LOC100129581           | 0.015  | 1.010 | 9.14E-01 | 9.14E+01 |  |
| 8050115 | AK127578     | C2orf46      | chromosome 2 open reading fram      | 0.125  | 1.091 | 7.47E-01 | 7.47E+01 |  |
| 8050128 | NM_020738    | KIDINS220    | kinase D-interacting substrate, 22  | 0.122  | 1.088 | 4.04E-01 | 4.04E+01 |  |
| 8050176 | NM_004763    | ITGB1BP1     | integrin beta 1 binding protein 1   | 0.011  | 1.008 | 9.64E-01 | 9.64E+01 |  |
| 8050190 | NM_003183    | ADAM17       | ADAM metallopeptidase domain 1      | 0.009  | 1.006 | 9.77E-01 | 9.77E+01 |  |
| 8050213 | ---          | ---          | ---                                 | 0.017  | 1.012 | 9.73E-01 | 9.73E+01 |  |
| 8050215 | NM_006826    | YWHAQ        | tyrosine 3-monooxygenase/trypto     | -0.009 | 0.993 | 9.57E-01 | 9.57E+01 |  |
| 8050232 | NM_00103716  | CYS1         | cystin 1                            | -0.087 | 0.942 | 2.09E-01 | 2.09E+01 |  |
| 8050240 | NM_002539    | ODC1         | ornithine decarboxylase 1           | -0.012 | 0.992 | 9.77E-01 | 9.77E+01 |  |
| 8050253 | ---          | ---          | ---                                 | -0.046 | 0.969 | 7.27E-01 | 7.27E+01 |  |
| 8050255 | NM_024894    | NOL10        | nucleolar protein 10                | 0.071  | 1.051 | 6.16E-01 | 6.16E+01 |  |
| 8050302 | NM_004850    | ROCK2        | Rho-associated, coiled-coil contain | -0.005 | 0.997 | 9.78E-01 | 9.78E+01 |  |
| 8050336 | NR_003094    | E2F6         | E2F transcription factor 6          | 0.193  | 1.143 | 1.51E-01 | 1.51E+01 |  |
| 8050350 | ---          | ---          | ---                                 | 0.150  | 1.109 | 4.36E-01 | 4.36E+01 |  |
| 8050352 | NM_012344    | NTSR2        | neurotensin receptor 2              | -0.003 | 0.998 | 9.86E-01 | 9.86E+01 |  |
| 8050367 | NM_015909    | NBAS         | neuroblastoma amplified sequenc     | -0.040 | 0.973 | 7.93E-01 | 7.93E+01 |  |
| 8050425 | ---          | ---          | ---                                 | -0.010 | 0.993 | 9.56E-01 | 9.56E+01 |  |
| 8050427 | NM_030797    | FAM49A       | family with sequence similarity 49  | 0.036  | 1.025 | 9.44E-01 | 9.44E+01 |  |
| 8050441 | ---          | ---          | ---                                 | -0.085 | 0.943 | 5.23E-01 | 5.23E+01 |  |
| 8050443 | NM_00114228  | SMC6         | structural maintenance of chromo    | 0.161  | 1.118 | 2.07E-01 | 2.07E+01 |  |
| 8050474 | NM_020905    | RDH14        | retinol dehydrogenase 14 (all-tran  | 0.068  | 1.048 | 4.46E-01 | 4.46E+01 |  |
| 8050497 | NM_145260    | OSR1         | odd-skipped related 1 (Drosophila   | 0.046  | 1.033 | 6.68E-01 | 6.68E+01 |  |
| 8050503 | NM_00100823  | TTC32        | tetratricopeptide repeat domain 3   | -0.048 | 0.968 | 8.79E-01 | 8.79E+01 |  |
| 8050548 | NM_014713    | LAPTM4A      | lysosomal protein transmembrane     | 0.198  | 1.147 | 2.12E-01 | 2.12E+01 |  |
| 8050557 | NM_00100694  | SDC1         | syndecan 1                          | 0.033  | 1.023 | 7.64E-01 | 7.64E+01 |  |
| 8050565 | NM_015317    | PUM2         | pumilio homolog 2 (Drosophila)      | -0.002 | 0.999 | 9.90E-01 | 9.90E+01 |  |
| 8050591 | NM_174889    | NDUFAF2      | NADH dehydrogenase (ubiquinone      | 0.030  | 1.021 | 9.09E-01 | 9.09E+01 |  |
| 8050594 | NM_022460    | HS1BP3       | HCLS1 binding protein 3             | -0.004 | 0.997 | 9.85E-01 | 9.85E+01 |  |
| 8050658 | NM_017552    | ATAD2B       | ATPase family, AAA domain conta     | 0.032  | 1.022 | 7.99E-01 | 7.99E+01 |  |
| 8050687 | ---          | ---          | ---                                 | -0.014 | 0.990 | 9.77E-01 | 9.77E+01 |  |
| 8050689 | NM_025203    | C2orf44      | chromosome 2 open reading fram      | 0.060  | 1.043 | 7.93E-01 | 7.93E+01 |  |
| 8050695 | NM_016047    | SF3B14       | splicing factor 3B, 14 kDa subunit  | 0.044  | 1.031 | 8.35E-01 | 8.35E+01 |  |
| 8050702 | NM_004881    | TP53I3       | tumor protein p53 inducible prote   | 0.005  | 1.003 | 9.86E-01 | 9.86E+01 |  |
| 8050713 | NM_199346    | PFN4         | profilin family, member 4           | 0.001  | 1.000 | 9.99E-01 | 9.99E+01 |  |
| 8050719 | NM_006277    | ITSN2        | intersectin 2                       | -0.046 | 0.969 | 5.46E-01 | 5.46E+01 |  |
| 8050761 | ---          | ---          | ---                                 | 0.033  | 1.023 | 9.53E-01 | 9.53E+01 |  |
| 8050763 | ENST00000380 | CENPO        | centromere protein O                | 0.122  | 1.089 | 3.79E-01 | 3.79E+01 |  |
| 8050766 | NM_004036    | ADCY3        | adenylate cyclase 3                 | -0.063 | 0.957 | 5.97E-01 | 5.97E+01 |  |
| 8050790 | NM_016544    | DNAJC27      | DnaJ (Hsp40) homolog, subfamily     | -0.088 | 0.941 | 6.66E-01 | 6.66E+01 |  |
| 8050813 | NM_175629    | DNMT3A       | DNA (cytosine-5-)-methyltransfera   | -0.002 | 0.999 | 9.89E-01 | 9.89E+01 |  |
| 8050846 | NM_021907    | DTNB         | dystrobrevin, beta                  | 0.075  | 1.053 | 4.14E-01 | 4.14E+01 |  |
| 8050869 | ---          | ---          | ---                                 | 0.165  | 1.122 | 4.76E-01 | 4.76E+01 |  |

|         |             |          |                                      |        |       |          |          |  |  |
|---------|-------------|----------|--------------------------------------|--------|-------|----------|----------|--|--|
| 8050875 | NM_018263   | ASXL2    | additional sex combs like 2 (Droso   | -0.045 | 0.969 | 6.02E-01 | 6.02E+01 |  |  |
| 8050894 | NM_002254   | KIF3C    | kinesin family member 3C             | -0.017 | 0.988 | 9.07E-01 | 9.07E+01 |  |  |
| 8050908 | NM_000182   | HADHA    | hydroxyacyl-Coenzyme A dehydro       | 0.096  | 1.069 | 4.64E-01 | 4.64E+01 |  |  |
| 8050924 | NM_00114516 | GPR113   | G protein-coupled receptor 113       | 0.019  | 1.013 | 8.80E-01 | 8.80E+01 |  |  |
| 8051012 | NM_013388   | PREB     | prolactin regulatory element bindi   | 0.046  | 1.032 | 5.95E-01 | 5.95E+01 |  |  |
| 8051024 | NM_178553   | C2orf53  | chromosome 2 open reading fram       | -0.019 | 0.987 | 8.91E-01 | 8.91E+01 |  |  |
| 8051028 | ---         | ---      | ---                                  | -0.132 | 0.913 | 6.91E-01 | 6.91E+01 |  |  |
| 8051030 | NM_021095   | SLC5A6   | solute carrier family 5 (sodium-de   | -0.018 | 0.987 | 9.33E-01 | 9.33E+01 |  |  |
| 8051050 | NM_003459   | SLC30A3  | solute carrier family 30 (zinc trans | 0.035  | 1.025 | 7.71E-01 | 7.71E+01 |  |  |
| 8051061 | NM_003353   | UCN      | urocortin                            | -0.065 | 0.956 | 5.31E-01 | 5.31E+01 |  |  |
| 8051066 | NM_002437   | MPV17    | MpV17 mitochondrial inner mem        | 0.069  | 1.049 | 6.20E-01 | 6.20E+01 |  |  |
| 8051075 | NM_001521   | GTF3C2   | general transcription factor IIIC, p | 0.075  | 1.054 | 3.90E-01 | 3.90E+01 |  |  |
| 8051097 | NM_00103411 | EIF2B4   | eukaryotic translation initiation fa | -0.011 | 0.993 | 9.61E-01 | 9.61E+01 |  |  |
| 8051113 | NM_144631   | ZNF513   | zinc finger protein 513              | -0.079 | 0.947 | 3.44E-01 | 3.44E+01 |  |  |
| 8051119 | NM_177983   | PPM1G    | protein phosphatase 1G (formerl      | -0.035 | 0.976 | 7.84E-01 | 7.84E+01 |  |  |
| 8051133 | NR_002201   | FTHL3P   | ferritin, heavy polypeptide-like 3 p | 0.057  | 1.040 | 6.55E-01 | 6.55E+01 |  |  |
| 8051135 | NM_015662   | IFT172   | intraflagellar transport 172 homol   | 0.010  | 1.007 | 9.70E-01 | 9.70E+01 |  |  |
| 8051187 | NM_022823   | FNDCA    | fibronectin type III domain contain  | -0.009 | 0.993 | 9.56E-01 | 9.56E+01 |  |  |
| 8051197 | NM_024584   | CCDC121  | coiled-coil domain containing 121    | 0.087  | 1.062 | 5.95E-01 | 5.95E+01 |  |  |
| 8051204 | NM_014860   | SUP7L    | suppressor of Ty 7 (S. cerevisiae)-l | -0.076 | 0.949 | 5.27E-01 | 5.27E+01 |  |  |
| 8051215 | NM_022128   | RBKS     | ribokinase                           | -0.062 | 0.958 | 6.37E-01 | 6.37E+01 |  |  |
| 8051226 | NM_017910   | TRMT61B  | tRNA methyltransferase 61 homol      | 0.066  | 1.047 | 8.04E-01 | 8.04E+01 |  |  |
| 8051238 | NM_00102988 | C2orf71  | chromosome 2 open reading fram       | 0.031  | 1.022 | 7.52E-01 | 7.52E+01 |  |  |
| 8051241 | NM_004304   | ALK      | anaplastic lymphoma receptor tyr     | 0.015  | 1.010 | 9.35E-01 | 9.35E+01 |  |  |
| 8051298 | NM_024572   | GALNT14  | UDP-N-acetyl-alpha-D-galactosam      | -0.017 | 0.988 | 9.00E-01 | 9.00E+01 |  |  |
| 8051370 | ---         | ---      | ---                                  | 0.085  | 1.061 | 5.22E-01 | 5.22E+01 |  |  |
| 8051372 | NM_015955   | MEMO1    | mediator of cell motility 1          | 0.138  | 1.100 | 1.14E-01 | 1.14E+01 |  |  |
| 8051387 | NM_032574   | DPY30    | dpy-30 homolog (C. elegans)          | -0.022 | 0.985 | 9.28E-01 | 9.28E+01 |  |  |
| 8051394 | ---         | ---      | ---                                  | 0.053  | 1.038 | 8.40E-01 | 8.40E+01 |  |  |
| 8051396 | NM_021209   | NLR4     | NLR family, CARD domain contain      | 0.332  | 1.259 | 5.17E-01 | 5.17E+01 |  |  |
| 8051413 | NM_015475   | FAM98A   | family with sequence similarity 98   | 0.138  | 1.100 | 3.18E-01 | 3.18E+01 |  |  |
| 8051422 | NR_003143   | MYADML   | myeloid-associated differentiation   | -0.040 | 0.973 | 7.51E-01 | 7.51E+01 |  |  |
| 8051427 | NM_005102   | FEZ2     | fasciculation and elongation prote   | 0.076  | 1.054 | 6.04E-01 | 6.04E+01 |  |  |
| 8051443 | NM_003162   | STRN     | striatin, calmodulin binding protei  | 0.015  | 1.011 | 9.23E-01 | 9.23E+01 |  |  |
| 8051462 | ---         | ---      | ---                                  | -0.089 | 0.940 | 8.03E-01 | 8.03E+01 |  |  |
| 8051464 | NM_019024   | HEATR5B  | HEAT repeat containing 5B            | 0.068  | 1.048 | 5.48E-01 | 5.48E+01 |  |  |
| 8051501 | NM_002759   | EIF2AK2  | eukaryotic translation initiation fa | 0.179  | 1.132 | 5.97E-01 | 5.97E+01 |  |  |
| 8051528 | NM_005760   | CEBPZ    | CCAAT/enhancer binding protein       | -0.027 | 0.981 | 8.88E-01 | 8.88E+01 |  |  |
| 8051547 | NM_005813   | PRKD3    | protein kinase D3                    | 0.004  | 1.003 | 9.87E-01 | 9.87E+01 |  |  |
| 8051573 | NM_006449   | CDC42EP3 | CDC42 effector protein (Rho GTPa     | -0.158 | 0.896 | 7.00E-02 | 7.00E+00 |  |  |
| 8051583 | NM_000104   | CYP1B1   | cytochrome P450, family 1, subfa     | 0.271  | 1.207 | 5.02E-01 | 5.02E+01 |  |  |
| 8051589 | NM_022374   | ATL2     | atlastin GTPase 2                    | 0.049  | 1.035 | 7.64E-01 | 7.64E+01 |  |  |
| 8051605 | NM_138394   | HNRPLL   | heterogeneous nuclear ribonucleo     | 0.110  | 1.079 | 4.47E-01 | 4.47E+01 |  |  |
| 8051622 | NM_00103168 | SFRS7    | splicing factor, arginine/serine-ric | 0.009  | 1.006 | 9.65E-01 | 9.65E+01 |  |  |
| 8051637 | NM_198963   | DHX57    | DEAH (Asp-Glu-Ala-Asp/His) box p     | 0.019  | 1.013 | 9.24E-01 | 9.24E+01 |  |  |
| 8051670 | NM_005633   | SOS1     | son of sevenless homolog 1 (Dros     | -0.074 | 0.950 | 4.96E-01 | 4.96E+01 |  |  |
| 8051773 | ---         | ---      | ---                                  | -0.058 | 0.960 | 6.99E-01 | 6.99E+01 |  |  |
| 8051777 | NM_004718   | COX7A2L  | cytochrome c oxidase subunit VIIa    | 0.021  | 1.015 | 8.49E-01 | 8.49E+01 |  |  |
| 8051793 | NM_148962   | OXER1    | oxoecicosanoid (OXE) receptor 1      | 0.010  | 1.007 | 9.64E-01 | 9.64E+01 |  |  |
| 8051799 | NM_012205   | HAAO     | 3-hydroxyanthranilate 3,4-dioxyge    | -0.003 | 0.998 | 9.85E-01 | 9.85E+01 |  |  |
| 8051812 | ---         | ---      | ---                                  | 0.186  | 1.137 | 2.97E-01 | 2.97E+01 |  |  |
| 8051814 | NM_006887   | ZFP36L2  | zinc finger protein 36, C3H type-li  | -0.041 | 0.972 | 6.46E-01 | 6.46E+01 |  |  |
| 8051820 | NM_022065   | THADA    | thyroid adenoma associated           | -0.022 | 0.985 | 9.18E-01 | 9.18E+01 |  |  |
| 8051882 | NM_133259   | LRPPRC   | leucine-rich PPR-motif containing    | 0.079  | 1.057 | 5.39E-01 | 5.39E+01 |  |  |
| 8051926 | ---         | ---      | ---                                  | -0.051 | 0.965 | 8.50E-01 | 8.50E+01 |  |  |
| 8051928 | NM_006036   | PREPL    | prolyl endopeptidase-like            | -0.046 | 0.968 | 8.41E-01 | 8.41E+01 |  |  |
| 8051949 | NM_016932   | SIX2     | SIX homeobox 2                       | -0.009 | 0.994 | 9.66E-01 | 9.66E+01 |  |  |
| 8051963 | NM_018079   | SRBD1    | S1 RNA binding domain 1              | 0.080  | 1.057 | 5.81E-01 | 5.81E+01 |  |  |
| 8051985 | ---         | ---      | ---                                  | -0.004 | 0.997 | 9.82E-01 | 9.82E+01 |  |  |
| 8051998 | NM_139279   | MCFD2    | multiple coagulation factor deficie  | -0.073 | 0.950 | 6.80E-01 | 6.80E+01 |  |  |
| 8052010 | NM_001743   | CALM2    | calmodulin 2 (phosphorylase kinas    | 0.194  | 1.144 | 2.59E-03 | 2.59E-01 |  |  |
| 8052016 | ---         | ---      | ---                                  | -0.047 | 0.968 | 7.87E-01 | 7.87E+01 |  |  |
| 8052018 | NM_022055   | KCNK12   | potassium channel, subfamily K, n    | -0.119 | 0.921 | 8.62E-02 | 8.62E+00 |  |  |
| 8052022 | AY779046    | RPL18A   | ribosomal protein L18a               | -0.036 | 0.975 | 8.64E-01 | 8.64E+01 |  |  |
| 8052024 | NM_025133   | FBXO11   | F-box protein 11                     | 0.083  | 1.059 | 4.35E-01 | 4.35E+01 |  |  |
| 8052087 | ---         | ---      | ---                                  | -0.010 | 0.993 | 9.72E-01 | 9.72E+01 |  |  |
| 8052125 | NM_016115   | ASB3     | ankyrin repeat and SOCS box-cont     | 0.011  | 1.008 | 9.64E-01 | 9.64E+01 |  |  |
| 8052139 | ---         | ---      | ---                                  | -0.048 | 0.967 | 8.41E-01 | 8.41E+01 |  |  |
| 8052141 | ---         | ---      | ---                                  | -0.152 | 0.900 | 5.91E-01 | 5.91E+01 |  |  |
| 8052143 | NM_006794   | GPR75    | G protein-coupled receptor 75        | -0.059 | 0.960 | 6.89E-01 | 6.89E+01 |  |  |
| 8052149 | NM_014614   | PSME4    | proteasome (prosome, macropain       | -0.051 | 0.965 | 7.78E-01 | 7.78E+01 |  |  |
| 8052200 | NM_00100393 | TSPYL6   | TSPY-like 6                          | 0.011  | 1.007 | 9.63E-01 | 9.63E+01 |  |  |
| 8052204 | NM_020532   | RTN4     | reticulon 4                          | 0.161  | 1.118 | 6.22E-02 | 6.22E+00 |  |  |
| 8052250 | NM_00100536 | MTIF2    | mitochondrial translational initiati | 0.040  | 1.028 | 8.60E-01 | 8.60E+01 |  |  |
| 8052269 | NM_00113559 | CCDC88A  | coiled-coil domain containing 88A    | 0.295  | 1.227 | 2.70E-01 | 2.70E+01 |  |  |
| 8052307 | NM_00112296 | SMEK2    | SMEK homolog 2, suppressor of m      | 0.009  | 1.006 | 9.61E-01 | 9.61E+01 |  |  |
| 8052331 | NM_033109   | PNPT1    | polyribonucleotide nucleotidyltran   | 0.107  | 1.077 | 7.38E-01 | 7.38E+01 |  |  |

|         |             |           |                                       |        |       |          |          |  |  |
|---------|-------------|-----------|---------------------------------------|--------|-------|----------|----------|--|--|
| 8052370 | ---         | ---       | ---                                   | -0.045 | 0.969 | 7.72E-01 | 7.72E+01 |  |  |
| 8052376 | NM_00108043 | CCDC85A   | coiled-coil domain containing 85A     | 0.021  | 1.015 | 8.81E-01 | 8.81E+01 |  |  |
| 8052380 | ---         | ---       | ---                                   | -0.081 | 0.945 | 3.20E-01 | 3.20E+01 |  |  |
| 8052382 | NM_00111463 | FANCL     | Fanconi anemia, complementation       | 0.248  | 1.188 | 1.65E-01 | 1.65E+01 |  |  |
| 8052397 | ---         | ---       | ---                                   | 0.012  | 1.008 | 9.49E-01 | 9.49E+01 |  |  |
| 8052399 | NM_022893   | BCL11A    | B-cell CLL/lymphoma 11A (zinc fin     | 0.185  | 1.137 | 3.94E-01 | 3.94E+01 |  |  |
| 8052443 | NM_014709   | USP34     | ubiquitin specific peptidase 34       | -0.022 | 0.985 | 8.71E-01 | 8.71E+01 |  |  |
| 8052526 | NM_003400   | XPO1      | exportin 1 (CRM1 homolog, yeast)      | 0.005  | 1.004 | 9.81E-01 | 9.81E+01 |  |  |
| 8052562 | NM_006430   | CCT4      | chaperonin containing TCP1, subu      | 0.035  | 1.025 | 8.07E-01 | 8.07E+01 |  |  |
| 8052583 | ---         | ---       | ---                                   | -0.044 | 0.970 | 7.93E-01 | 7.93E+01 |  |  |
| 8052598 | NM_015910   | C2orf86   | chromosome 2 open reading fram        | 0.145  | 1.106 | 4.24E-01 | 4.24E+01 |  |  |
| 8052622 | NR_003131   | LOC388955 | PX19 protein pseudogene               | -0.067 | 0.955 | 5.95E-01 | 5.95E+01 |  |  |
| 8052624 | AK094167    | FLJ36848  | hypothetical LOC647115                | -0.045 | 0.969 | 7.09E-01 | 7.09E+01 |  |  |
| 8052654 | NM_020651   | PEL1      | pellino homolog 1 (Drosophila)        | -0.018 | 0.988 | 9.36E-01 | 9.36E+01 |  |  |
| 8052667 | ---         | ---       | ---                                   | -0.003 | 0.998 | 9.88E-01 | 9.88E+01 |  |  |
| 8052669 | NM_014755   | SERTAD2   | SERTA domain containing 2             | -0.057 | 0.961 | 7.12E-01 | 7.12E+01 |  |  |
| 8052676 | ---         | ---       | ---                                   | -0.015 | 0.990 | 9.53E-01 | 9.53E+01 |  |  |
| 8052680 | NM_004161   | RAB1A     | RAB1A, member RAS oncogene fa         | 0.179  | 1.132 | 1.11E-01 | 1.11E+01 |  |  |
| 8052689 | NM_181784   | SPRED2    | sprouty-related, EVH1 domain con      | -0.238 | 0.848 | 3.59E-02 | 3.59E+00 |  |  |
| 8052698 | NM_006333   | C1D       | C1D nuclear receptor co-repressor     | 0.068  | 1.048 | 6.87E-01 | 6.87E+01 |  |  |
| 8052703 | NM_138458   | WDR92     | WD repeat domain 92                   | 0.092  | 1.066 | 5.55E-01 | 5.55E+01 |  |  |
| 8052721 | NM_000945   | PPP3R1    | protein phosphatase 3 (formerly 2     | 0.114  | 1.082 | 1.48E-01 | 1.48E+01 |  |  |
| 8052731 | ---         | ---       | ---                                   | -0.264 | 0.833 | 2.20E-01 | 2.20E+01 |  |  |
| 8052735 | NM_015463   | CNRIP1    | cannabinoid receptor interacting g    | -0.072 | 0.951 | 4.63E-01 | 4.63E+01 |  |  |
| 8052762 | NM_002056   | GFPT1     | glutamine-fructose-6-phosphate t      | -0.046 | 0.969 | 7.92E-01 | 7.92E+01 |  |  |
| 8052784 | NM_015700   | NFU1      | NFU1 iron-sulfur cluster scaffold h   | -0.052 | 0.965 | 7.38E-01 | 7.38E+01 |  |  |
| 8052798 | NM_014911   | AAK1      | AP2 associated kinase 1               | -0.040 | 0.973 | 8.74E-01 | 8.74E+01 |  |  |
| 8052803 | NM_014911   | AAK1      | AP2 associated kinase 1               | -0.026 | 0.982 | 8.75E-01 | 8.75E+01 |  |  |
| 8052834 | BC005079    | C2orf42   | chromosome 2 open reading fram        | -0.012 | 0.992 | 9.57E-01 | 9.57E+01 |  |  |
| 8052845 | NM_022173   | TIA1      | TIA1 cytotoxic granule-associated     | -0.013 | 0.991 | 9.12E-01 | 9.12E+01 |  |  |
| 8052861 | NM_003096   | SNRPG     | small nuclear ribonucleoprotein p     | -0.038 | 0.974 | 8.31E-01 | 8.31E+01 |  |  |
| 8052866 | NM_032822   | FAM136A   | family with sequence similarity 13    | -0.024 | 0.983 | 9.00E-01 | 9.00E+01 |  |  |
| 8052882 | NM_017488   | ADD2      | adducin 2 (beta)                      | -0.052 | 0.965 | 7.86E-01 | 7.86E+01 |  |  |
| 8052908 | NM_173535   | CLEC4F    | C-type lectin domain family 4, me     | -0.011 | 0.993 | 9.58E-01 | 9.58E+01 |  |  |
| 8052925 | NM_144582   | TEX261    | testis expressed 261                  | 0.255  | 1.193 | 7.11E-02 | 7.11E+00 |  |  |
| 8052932 | ---         | ---       | ---                                   | -0.053 | 0.964 | 6.38E-01 | 6.38E+01 |  |  |
| 8052956 | NM_015189   | EXOC6B    | exocyst complex component 6B          | -0.128 | 0.915 | 3.56E-01 | 3.56E+01 |  |  |
| 8052979 | NM_144579   | SFXN5     | sideroflexin 5                        | 0.025  | 1.017 | 9.14E-01 | 9.14E+01 |  |  |
| 8052994 | NM_015470   | RAB11FIP5 | RAB11 family interacting protein 5    | -0.039 | 0.974 | 7.51E-01 | 7.51E+01 |  |  |
| 8053004 | NM_032319   | C2orf7    | chromosome 2 open reading fram        | -0.131 | 0.913 | 3.39E-01 | 3.39E+01 |  |  |
| 8053009 | NM_00108041 | FBXO41    | F-box protein 41                      | -0.049 | 0.967 | 5.16E-01 | 5.16E+01 |  |  |
| 8053022 | NM_001965   | EGR4      | early growth response 4               | -0.139 | 0.908 | 5.53E-02 | 5.53E+00 |  |  |
| 8053030 | NM_016347   | NAT8B     | N-acetyltransferase 8B (GCN5-rela     | 0.003  | 1.002 | 9.86E-01 | 9.86E+01 |  |  |
| 8053036 | NM_016058   | TPRK8     | TP53RK binding protein                | -0.023 | 0.984 | 9.42E-01 | 9.42E+01 |  |  |
| 8053046 | NM_003584   | DUSP11    | dual specificity phosphatase 11 (R    | -0.012 | 0.992 | 9.49E-01 | 9.49E+01 |  |  |
| 8053057 | ---         | ---       | ---                                   | 0.041  | 1.029 | 8.75E-01 | 8.75E+01 |  |  |
| 8053059 | NM_212552   | BOLA3     | bolA homolog 3 (E. coli)              | -0.011 | 0.993 | 9.73E-01 | 9.73E+01 |  |  |
| 8053064 | NM_018221   | MOBK1B    | MOB1, Mps One Binder kinase act       | 0.187  | 1.138 | 1.79E-02 | 1.79E+00 |  |  |
| 8053073 | NM_133478   | SLC4A5    | solute carrier family 4, sodium bic   | 0.008  | 1.006 | 9.75E-01 | 9.75E+01 |  |  |
| 8053107 | NM_004082   | DCTN1     | dynactin 1 (p150, glued homolog,      | -0.069 | 0.953 | 4.47E-01 | 4.47E+01 |  |  |
| 8053139 | NM_00114505 | C2orf81   | chromosome 2 open reading fram        | 0.033  | 1.023 | 7.92E-01 | 7.92E+01 |  |  |
| 8053142 | NM_033046   | RTKN      | rhotekin                              | -0.007 | 0.995 | 9.64E-01 | 9.64E+01 |  |  |
| 8053158 | NM_006302   | MOGS      | mannosyl-oligosaccharide glucosid     | 0.011  | 1.007 | 9.66E-01 | 9.66E+01 |  |  |
| 8053165 | NM_053050   | MRPL53    | mitochondrial ribosomal protein L     | -0.043 | 0.971 | 8.47E-01 | 8.47E+01 |  |  |
| 8053171 | NM_032779   | CCDC142   | coiled-coil domain containing 142     | 0.020  | 1.014 | 8.93E-01 | 8.93E+01 |  |  |
| 8053183 | NM_00100981 | LBX2      | ladybird homeobox 2                   | -0.011 | 0.992 | 9.59E-01 | 9.59E+01 |  |  |
| 8053187 | NM_032673   | PCGF1     | polycomb group ring finger 1          | 0.060  | 1.042 | 6.93E-01 | 6.93E+01 |  |  |
| 8053200 | NM_133637   | DQX1      | DEAQ box RNA-dependent ATPase         | 0.016  | 1.011 | 9.16E-01 | 9.16E+01 |  |  |
| 8053214 | NM_181575   | AUP1      | ancient ubiquitous protein 1          | -0.039 | 0.974 | 7.78E-01 | 7.78E+01 |  |  |
| 8053231 | NM_032603   | LOXL3     | lysyl oxidase-like 3                  | 0.030  | 1.021 | 8.01E-01 | 8.01E+01 |  |  |
| 8053248 | BC025997    | C2orf65   | chromosome 2 open reading fram        | -0.006 | 0.996 | 9.69E-01 | 9.69E+01 |  |  |
| 8053263 | ---         | ---       | ---                                   | 0.043  | 1.030 | 7.81E-01 | 7.81E+01 |  |  |
| 8053311 | ---         | ---       | ---                                   | 0.004  | 1.003 | 9.86E-01 | 9.86E+01 |  |  |
| 8053366 | NM_003849   | SUCLG1    | succinate-CoA ligase, alpha subun     | 0.147  | 1.107 | 9.01E-02 | 9.01E+00 |  |  |
| 8053379 | AK296608    | LOC129293 | hypothetical protein LOC129293        | 0.045  | 1.032 | 8.46E-01 | 8.46E+01 |  |  |
| 8053386 | ---         | ---       | ---                                   | 0.081  | 1.058 | 5.24E-01 | 5.24E+01 |  |  |
| 8053388 | NM_006464   | TGOLN2    | trans-golgi network protein 2         | 0.023  | 1.016 | 9.07E-01 | 9.07E+01 |  |  |
| 8053406 | NM_017750   | RETSAT    | retinol saturase (all-trans-retinol 1 | -0.113 | 0.925 | 3.94E-01 | 3.94E+01 |  |  |
| 8053417 | NM_001747   | CAPG      | capping protein (actin filament), g   | 0.140  | 1.102 | 6.83E-01 | 6.83E+01 |  |  |
| 8053427 | ---         | ---       | ---                                   | -0.016 | 0.989 | 9.74E-01 | 9.74E+01 |  |  |
| 8053429 | NM_000821   | GGCX      | gamma-glutamyl carboxylase            | 0.048  | 1.034 | 8.33E-01 | 8.33E+01 |  |  |
| 8053449 | NM_00103173 | TMEM150A  | transmembrane protein 150A            | 0.006  | 1.004 | 9.78E-01 | 9.78E+01 |  |  |
| 8053458 | NM_00101364 | C2orf68   | chromosome 2 open reading fram        | -0.015 | 0.990 | 9.30E-01 | 9.30E+01 |  |  |
| 8053467 | NM_000542   | SFTPB     | surfactant protein B                  | -0.017 | 0.989 | 8.91E-01 | 8.91E+01 |  |  |
| 8053480 | ---         | ---       | ---                                   | -0.131 | 0.913 | 9.94E-02 | 9.94E+00 |  |  |
| 8053496 | NM_015425   | POLR1A    | polymerase (RNA) I polypeptide A,     | 0.064  | 1.045 | 5.53E-01 | 5.53E+01 |  |  |
| 8053533 | NM_006839   | IMMT      | inner membrane protein, mitochon      | 0.078  | 1.056 | 4.39E-01 | 4.39E+01 |  |  |



|         |              |             |                                                                |        |       |          |          |  |
|---------|--------------|-------------|----------------------------------------------------------------|--------|-------|----------|----------|--|
| 8053551 | NM_022912    | REEP1       | receptor accessory protein 1                                   | 0.068  | 1.048 | 5.32E-01 | 5.32E+01 |  |
| 8053562 | NM_016079    | VPS24       | vacuolar protein sorting 24 homolog                            | 0.139  | 1.101 | 1.74E-01 | 1.74E+01 |  |
| 8053576 | NM_005667    | RNF103      | ring finger protein 103                                        | -0.130 | 0.914 | 2.86E-01 | 2.86E+01 |  |
| 8053584 | NR_027353    | CD8A        | CD8a molecule                                                  | -0.158 | 0.896 | 2.91E-01 | 2.91E+01 |  |
| 8053599 | NM_012477    | WBP1        | WW domain binding protein 1                                    | -0.101 | 0.932 | 5.09E-01 | 5.09E+01 |  |
| 8053610 | NM_022662    | ANAPC1      | anaphase promoting complex subunit 1                           | -0.033 | 0.977 | 8.62E-01 | 8.62E+01 |  |
| 8053622 | NM_00102445  | RGPD1       | RANBP2-like and GRIP domain containing                         | -0.080 | 0.946 | 5.29E-01 | 5.29E+01 |  |
| 8053662 | ---          | ---         | ---                                                            | -0.209 | 0.865 | 1.61E-01 | 1.61E+01 |  |
| 8053668 | NM_004836    | EIF2AK3     | eukaryotic translation initiation factor 2                     | 0.158  | 1.116 | 6.90E-03 | 6.90E-01 |  |
| 8053710 | ---          | ---         | ---                                                            | 0.026  | 1.018 | 8.41E-01 | 8.41E+01 |  |
| 8053713 | ---          | ---         | ---                                                            | 0.308  | 1.238 | 1.24E-02 | 1.24E+00 |  |
| 8053722 | NR_027238    | LOC654342   | lymphocyte-specific protein 1 pseudogene                       | -0.039 | 0.973 | 8.64E-01 | 8.64E+01 |  |
| 8053728 | NM_000798    | DRD5        | dopamine receptor D5                                           | 0.035  | 1.024 | 7.68E-01 | 7.68E+01 |  |
| 8053731 | AK095105     | FLJ37786    | hypothetical LOC642691                                         | -0.004 | 0.997 | 9.85E-01 | 9.85E+01 |  |
| 8053733 | NM_020382    | SETD8       | SET domain containing (lysine methyltransferase)               | 0.066  | 1.047 | 6.43E-01 | 6.43E+01 |  |
| 8053735 | ---          | ---         | ---                                                            | 0.311  | 1.240 | 5.11E-03 | 5.11E-01 |  |
| 8053761 | ---          | ---         | ---                                                            | -0.028 | 0.981 | 8.88E-01 | 8.88E+01 |  |
| 8053763 | NM_031902    | MRP55       | mitochondrial ribosomal protein S15                            | 0.023  | 1.016 | 8.92E-01 | 8.92E+01 |  |
| 8053775 | NM_032788    | ZNF514      | zinc finger protein 514                                        | -0.023 | 0.984 | 9.16E-01 | 9.16E+01 |  |
| 8053797 | ENST00000456 | LOC400986   | protein immuno-reactive with anti-CD4                          | -0.127 | 0.916 | 6.58E-01 | 6.58E+01 |  |
| 8053801 | NM_025190    | ANKRD36B    | ankyrin repeat domain 36B                                      | -0.044 | 0.970 | 8.86E-01 | 8.86E+01 |  |
| 8053834 | NM_025190    | ANKRD36B    | ankyrin repeat domain 36B                                      | -0.113 | 0.924 | 4.73E-01 | 4.73E+01 |  |
| 8053840 | ---          | ---         | ---                                                            | -0.095 | 0.936 | 3.28E-01 | 3.28E+01 |  |
| 8053842 | NM_207328    | GPAT2       | glycerol-3-phosphate acyltransferase 2                         | -0.053 | 0.964 | 5.15E-01 | 5.15E+01 |  |
| 8053869 | NM_000682    | ADRA2B      | adrenergic, alpha-2B-, receptor                                | -0.005 | 0.997 | 9.81E-01 | 9.81E+01 |  |
| 8053872 | NM_00100203  | ASTL        | astacin-like metallo-endopeptidase                             | -0.057 | 0.961 | 5.34E-01 | 5.34E+01 |  |
| 8053882 | NM_004418    | DUSP2       | dual specificity phosphatase 2                                 | -0.043 | 0.971 | 7.77E-01 | 7.77E+01 |  |
| 8053890 | NM_020151    | STARD7      | StAR-related lipid transfer (START domain)                     | 0.097  | 1.070 | 2.99E-01 | 2.99E+01 |  |
| 8053901 | NM_017849    | TMEM127     | transmembrane protein 127                                      | 0.014  | 1.010 | 9.56E-01 | 9.56E+01 |  |
| 8053909 | NM_014014    | SNRNP200    | small nuclear ribonucleoprotein 200                            | -0.070 | 0.953 | 5.94E-01 | 5.94E+01 |  |
| 8053944 | NR_026875    | NEURL3      | neuronal homolog 3 (Drosophila)                                | -0.018 | 0.987 | 9.08E-01 | 9.08E+01 |  |
| 8053949 | NM_017991    | KIAA1310    | KIAA1310                                                       | 0.051  | 1.036 | 6.38E-01 | 6.38E+01 |  |
| 8053975 | NM_00114229  | LMAN2L      | lectin, mannose-binding 2-like                                 | 0.060  | 1.042 | 6.80E-01 | 6.80E+01 |  |
| 8053984 | NM_144994    | ANKRD23     | ankyrin repeat domain 23                                       | -0.043 | 0.971 | 7.10E-01 | 7.10E+01 |  |
| 8053998 | NM_016466    | ANKRD39     | ankyrin repeat domain 39                                       | -0.070 | 0.953 | 4.05E-01 | 4.05E+01 |  |
| 8054004 | NM_017789    | SEMA4C      | sema domain, immunoglobulin domain                             | -0.100 | 0.933 | 4.85E-01 | 4.85E+01 |  |
| 8054020 | BC038583     | FAM178B     | family with sequence similarity 178                            | -0.063 | 0.957 | 5.01E-01 | 5.01E+01 |  |
| 8054045 | NM_199336    | FAHD2B      | fumarylacetoacetate hydrolase domain                           | 0.026  | 1.018 | 8.59E-01 | 8.59E+01 |  |
| 8054054 | NM_025190    | ANKRD36B    | ankyrin repeat domain 36B                                      | -0.041 | 0.972 | 8.59E-01 | 8.59E+01 |  |
| 8054064 | NM_025190    | ANKRD36B    | ankyrin repeat domain 36B                                      | 0.032  | 1.023 | 9.30E-01 | 9.30E+01 |  |
| 8054077 | NM_005735    | ACTR1B      | ARP1 actin-related protein 1 homolog                           | -0.083 | 0.944 | 6.30E-01 | 6.30E+01 |  |
| 8054090 | ---          | ---         | ---                                                            | -0.036 | 0.975 | 9.28E-01 | 9.28E+01 |  |
| 8054092 | NM_015348    | TMEM131     | transmembrane protein 131                                      | 0.061  | 1.043 | 6.82E-01 | 6.82E+01 |  |
| 8054131 | BC047722     | C2orf64     | chromosome 2 open reading frame 64                             | 0.026  | 1.018 | 8.75E-01 | 8.75E+01 |  |
| 8054135 | NM_012214    | MGAT4A      | mannosyl (alpha-1,3-)-glycoproteinase                          | 0.064  | 1.046 | 7.08E-01 | 7.08E+01 |  |
| 8054154 | NM_207362    | C2orf55     | chromosome 2 open reading frame 55                             | -0.088 | 0.941 | 3.85E-01 | 3.85E+01 |  |
| 8054192 | NM_138798    | MITD1       | MIT, microtubule interacting and targeting domain 1            | 0.035  | 1.024 | 8.25E-01 | 8.25E+01 |  |
| 8054209 | NM_174898    | LYG1        | lysozyme G-like 1                                              | -0.086 | 0.942 | 7.11E-01 | 7.11E+01 |  |
| 8054217 | NM_005783    | TXNDC9      | thioredoxin domain containing 9                                | -0.056 | 0.962 | 7.72E-01 | 7.72E+01 |  |
| 8054227 | NM_016316    | REV1        | REV1 homolog (S. cerevisiae)                                   | 0.028  | 1.020 | 8.47E-01 | 8.47E+01 |  |
| 8054254 | NM_002285    | AFF3        | AF4/FMR2 family, member 3                                      | 0.315  | 1.244 | 3.08E-02 | 3.08E+00 |  |
| 8054281 | NM_198461    | LONRF2      | LON peptidase N-terminal domain                                | 0.000  | 1.000 | 9.99E-01 | 9.99E+01 |  |
| 8054295 | ---          | ---         | ---                                                            | -0.012 | 0.992 | 9.64E-01 | 9.64E+01 |  |
| 8054297 | NM_004854    | CHST10      | carbohydrate sulfotransferase 10                               | -0.098 | 0.934 | 4.01E-01 | 4.01E+01 |  |
| 8054308 | NM_00110242  | TBC1D8      | TBC1 domain family, member 8 (with TBC1 domain)                | -0.055 | 0.962 | 7.72E-01 | 7.72E+01 |  |
| 8054329 | NM_173647    | RNF149      | ring finger protein 149                                        | -0.031 | 0.979 | 8.04E-01 | 8.04E+01 |  |
| 8054354 | ---          | ---         | ---                                                            | 0.037  | 1.026 | 9.22E-01 | 9.22E+01 |  |
| 8054356 | NM_032718    | MFS9        | major facilitator superfamily domain                           | 0.031  | 1.022 | 8.49E-01 | 8.49E+01 |  |
| 8054364 | NM_004257    | TGFBRAP1    | transforming growth factor, beta receptor associated protein 1 | 0.009  | 1.006 | 9.77E-01 | 9.77E+01 |  |
| 8054377 | NM_201555    | FHL2        | four and a half LIM domains 2                                  | -0.007 | 0.995 | 9.76E-01 | 9.76E+01 |  |
| 8054393 | ---          | ---         | ---                                                            | -0.244 | 0.845 | 3.61E-01 | 3.61E+01 |  |
| 8054395 | NM_025076    | UXS1        | UDP-glucuronate decarboxylase 1                                | 0.072  | 1.051 | 6.11E-01 | 6.11E+01 |  |
| 8054414 | NM_00114401  | RGPD3       | RANBP2-like and GRIP domain containing                         | -0.083 | 0.944 | 5.01E-01 | 5.01E+01 |  |
| 8054437 | NM_022662    | ANAPC1      | anaphase promoting complex subunit 1                           | -0.058 | 0.961 | 8.35E-01 | 8.35E+01 |  |
| 8054449 | AK095987     | hCG_1993592 | hypothetical LOC644903                                         | -0.003 | 0.998 | 9.90E-01 | 9.90E+01 |  |
| 8054465 | ENST00000429 | hCG_1732469 | hCG1732469                                                     | 0.006  | 1.004 | 9.81E-01 | 9.81E+01 |  |
| 8054467 | NM_144710    | 04031       | septin 10                                                      | -0.283 | 0.822 | 2.56E-01 | 2.56E+01 |  |
| 8054477 | CR590757     | RPL22P15    | ribosomal protein L22 pseudogene                               | -0.032 | 0.978 | 8.21E-01 | 8.21E+01 |  |
| 8054479 | NM_005434    | MALL        | mal, T-cell differentiation protein                            | 0.025  | 1.018 | 8.40E-01 | 8.40E+01 |  |
| 8054519 | NM_004987    | LIMS1       | LIM and senescent cell antigen-like motif                      | 0.195  | 1.145 | 3.04E-01 | 3.04E+01 |  |
| 8054532 | 0            | 0           | 0                                                              | -0.088 | 0.941 | 4.91E-01 | 4.91E+01 |  |
| 8054557 | 0            | 0           | 0                                                              | -0.098 | 0.934 | 3.95E-01 | 3.95E+01 |  |
| 8054611 | NR_024204    | NCRNA00152  | non-protein coding RNA 152                                     | -0.020 | 0.986 | 9.53E-01 | 9.53E+01 |  |
| 8054614 | NM_022662    | ANAPC1      | anaphase promoting complex subunit 1                           | -0.072 | 0.951 | 5.77E-01 | 5.77E+01 |  |
| 8054664 | NM_032494    | ZC3H8       | zinc finger CCHC-type containing 8                             | -0.130 | 0.914 | 3.72E-01 | 3.72E+01 |  |
| 8054676 | NM_005054    | RGPD5       | RANBP2-like and GRIP domain containing                         | -0.088 | 0.941 | 4.88E-01 | 4.88E+01 |  |
| 8054740 | NM_003466    | PAX8        | paired box 8                                                   | 0.048  | 1.034 | 6.47E-01 | 6.47E+01 |  |

|         |              |              |                                    |        |       |          |          |  |  |
|---------|--------------|--------------|------------------------------------|--------|-------|----------|----------|--|--|
| 8054758 | NR_024005    | MGC13005     | hypothetical LOC84771              | 0.087  | 1.062 | 6.04E-01 | 6.04E+01 |  |  |
| 8054762 | NR_024528    | RPL23AP7     | ribosomal protein L23a pseudogen   | -0.004 | 0.997 | 9.78E-01 | 9.78E+01 |  |  |
| 8054766 | NM_001097    | ACR          | acrosin                            | 0.028  | 1.019 | 8.11E-01 | 8.11E+01 |  |  |
| 8054771 | NM_025181    | SLC35F5      | solute carrier family 35, member F | 0.130  | 1.094 | 2.76E-01 | 2.76E+01 |  |  |
| 8054796 | ---          | ---          | ---                                | -0.061 | 0.959 | 5.74E-01 | 5.74E+01 |  |  |
| 8054804 | NM_019044    | CCDC93       | coiled-coil domain containing 93   | -0.068 | 0.954 | 7.22E-01 | 7.22E+01 |  |  |
| 8054831 | NM_001426    | EN1          | engrailed homeobox 1               | -0.009 | 0.994 | 9.52E-01 | 9.52E+01 |  |  |
| 8054862 | NR_000034    | TMEM185B     | transmembrane protein 185B (pse    | -0.069 | 0.953 | 5.99E-01 | 5.99E+01 |  |  |
| 8054870 | ---          | ---          | ---                                | -0.075 | 0.950 | 8.04E-01 | 8.04E+01 |  |  |
| 8054888 | NM_015282    | CLASP1       | cytoplasmic linker associated prot | -0.192 | 0.875 | 1.03E-02 | 1.03E+00 |  |  |
| 8054930 | NM_032390    | MKI67IP      | MKI67 (FHA domain) interacting n   | 0.046  | 1.033 | 7.50E-01 | 7.50E+01 |  |  |
| 8054939 | ---          | ---          | ---                                | 0.108  | 1.078 | 1.29E-01 | 1.29E+01 |  |  |
| 8054943 | ---          | ---          | ---                                | 0.253  | 1.191 | 6.46E-01 | 6.46E+01 |  |  |
| 8054945 | NM_139343    | BIN1         | bridging integrator 1              | -0.091 | 0.939 | 3.18E-01 | 3.18E+01 |  |  |
| 8054978 | NM_000122    | ERCC3        | excision repair cross-complement   | -0.124 | 0.917 | 1.68E-01 | 1.68E+01 |  |  |
| 8054997 | NM_006609    | MAP3K2       | mitogen-activated protein kinase f | 0.006  | 1.004 | 9.83E-01 | 9.83E+01 |  |  |
| 8055016 | ---          | ---          | ---                                | -0.125 | 0.917 | 5.17E-01 | 5.17E+01 |  |  |
| 8055021 | NM_017969    | IWS1         | IWS1 homolog (S. cerevisiae)       | -0.013 | 0.991 | 9.43E-01 | 9.43E+01 |  |  |
| 8055038 | NM_017980    | LIMS2        | LIM and senescent cell antigen-lik | -0.061 | 0.959 | 4.67E-01 | 4.67E+01 |  |  |
| 8055060 | NM_018383    | WDR33        | WD repeat domain 33                | -0.034 | 0.977 | 7.91E-01 | 7.91E+01 |  |  |
| 8055085 | ---          | ---          | ---                                | 0.078  | 1.055 | 5.84E-01 | 5.84E+01 |  |  |
| 8055089 | NM_004805    | POLR2D       | polymerase (RNA) II (DNA directe   | 0.089  | 1.064 | 4.68E-01 | 4.68E+01 |  |  |
| 8055104 | NM_00114592  | SAP130       | Sin3A-associated protein, 130kDa   | 0.058  | 1.041 | 5.17E-01 | 5.17E+01 |  |  |
| 8055130 | NM_004807    | HS6ST1       | heparan sulfate 6-O-sulfotransfer  | -0.055 | 0.963 | 3.81E-01 | 3.81E+01 |  |  |
| 8055135 | ---          | ---          | ---                                | 0.120  | 1.087 | 7.49E-01 | 7.49E+01 |  |  |
| 8055139 | AK056598     | LOC1511121   | hypothetical LOC1511121            | -0.059 | 0.960 | 6.79E-01 | 6.79E+01 |  |  |
| 8055151 | NM_00109977  | POTEF        | POTE ankyrin domain family, mem    | 0.100  | 1.071 | 4.83E-01 | 4.83E+01 |  |  |
| 8055171 | ---          | ---          | ---                                | -0.095 | 0.936 | 6.83E-01 | 6.83E+01 |  |  |
| 8055183 | NM_017751    | SMPD4        | sphingomyelin phosphodiesterase    | -0.051 | 0.965 | 7.97E-01 | 7.97E+01 |  |  |
| 8055194 | NM_207312    | TUBA3E       | tubulin, alpha 3e                  | -0.075 | 0.949 | 7.03E-01 | 7.03E+01 |  |  |
| 8055202 | ---          | ---          | ---                                | 0.171  | 1.126 | 6.16E-01 | 6.16E+01 |  |  |
| 8055204 | ---          | ---          | ---                                | -0.028 | 0.981 | 8.86E-01 | 8.86E+01 |  |  |
| 8055208 | NM_032357    | CCDC115      | coiled-coil domain containing 115  | -0.058 | 0.961 | 6.60E-01 | 6.60E+01 |  |  |
| 8055220 | NM_00108353  | POTEE        | POTE ankyrin domain family, mem    | 0.059  | 1.042 | 7.52E-01 | 7.52E+01 |  |  |
| 8055234 | ---          | ---          | ---                                | -0.062 | 0.958 | 8.05E-01 | 8.05E+01 |  |  |
| 8055239 | NM_032545    | CFC1         | cripto, FRL-1, cryptic family 1    | -0.078 | 0.948 | 3.42E-01 | 3.42E+01 |  |  |
| 8055247 | ---          | ---          | ---                                | -0.048 | 0.967 | 7.15E-01 | 7.15E+01 |  |  |
| 8055249 | NM_00100999  | FAM168B      | family with sequence similarity 16 | -0.064 | 0.957 | 6.34E-01 | 6.34E+01 |  |  |
| 8055261 | NM_032144    | RAB6C        | RAB6C, member RAS oncogene fa      | -0.012 | 0.992 | 9.53E-01 | 9.53E+01 |  |  |
| 8055265 | ---          | ---          | ---                                | 0.020  | 1.014 | 9.09E-01 | 9.09E+01 |  |  |
| 8055281 | NR_002826    | LOC401010    | nucleolar complex associated 2 ho  | -0.081 | 0.946 | 3.90E-01 | 3.90E+01 |  |  |
| 8055284 | ENST00000427 | FAM128A      | family with sequence similarity 12 | 0.011  | 1.008 | 9.63E-01 | 9.63E+01 |  |  |
| 8055287 | NM_00108536  | FAM128A      | family with sequence similarity 12 | -0.019 | 0.987 | 8.80E-01 | 8.80E+01 |  |  |
| 8055291 | BC043584     | C2orf27B     | chromosome 2 open reading fram     | -0.142 | 0.906 | 7.56E-02 | 7.56E+00 |  |  |
| 8055309 | ---          | ---          | ---                                | -0.030 | 0.980 | 7.84E-01 | 7.84E+01 |  |  |
| 8055314 | NM_144586    | LYPD1        | LY6/PLAUR domain containing 1      | 0.017  | 1.012 | 9.15E-01 | 9.15E+01 |  |  |
| 8055350 | NM_030923    | TMEM163      | transmembrane protein 163          | 0.062  | 1.044 | 6.87E-01 | 6.87E+01 |  |  |
| 8055404 | NM_014607    | UBXN4        | UBX domain protein 4               | -0.087 | 0.941 | 3.94E-01 | 3.94E+01 |  |  |
| 8055406 | NM_002299    | LCT          | lactase                            | 0.051  | 1.036 | 6.75E-01 | 6.75E+01 |  |  |
| 8055426 | NM_005915    | MCM6         | minichromosome maintenance co      | -0.176 | 0.885 | 2.24E-01 | 2.24E+01 |  |  |
| 8055445 | NM_001349    | DARS         | aspartyl-tRNA synthetase           | -0.060 | 0.959 | 6.53E-01 | 6.53E+01 |  |  |
| 8055465 | NM_00100854  | CXCR4        | chemokine (C-X-C motif) receptor   | -0.202 | 0.869 | 7.06E-03 | 7.06E-01 |  |  |
| 8055476 | NR_024058    | YWHAE        | tyrosine 3-monooxygenase/trypto    | 0.067  | 1.048 | 6.76E-01 | 6.76E+01 |  |  |
| 8055478 | NM_007226    | NXP2         | neurexophilin 2                    | 0.003  | 1.002 | 9.82E-01 | 9.82E+01 |  |  |
| 8055486 | ---          | ---          | ---                                | -0.137 | 0.910 | 7.07E-01 | 7.07E+01 |  |  |
| 8055592 | ---          | ---          | ---                                | 0.112  | 1.081 | 5.90E-01 | 5.90E+01 |  |  |
| 8055606 | NM_00100663  | GTDC1        | glycosyltransferase-like domain co | -0.100 | 0.933 | 5.97E-01 | 5.97E+01 |  |  |
| 8055624 | NM_014795    | ZEB2         | zinc finger E-box binding homeobd  | 0.254  | 1.193 | 2.66E-01 | 2.66E+01 |  |  |
| 8055664 | ---          | ---          | ---                                | 0.054  | 1.038 | 8.15E-01 | 8.15E+01 |  |  |
| 8055672 | NM_015702    | MMADHC       | methylnmalonic aciduria (cobalami  | -0.047 | 0.968 | 7.68E-01 | 7.68E+01 |  |  |
| 8055702 | NM_004688    | NMI          | N-myc (and STAT) interactor        | 0.118  | 1.085 | 5.17E-01 | 5.17E+01 |  |  |
| 8055711 | NM_004543    | NEB          | nebulin                            | -0.021 | 0.986 | 9.24E-01 | 9.24E+01 |  |  |
| 8055862 | NM_012097    | ARL5A        | ADP-ribosylation factor-like 5A    | 0.045  | 1.032 | 6.66E-01 | 6.66E+01 |  |  |
| 8055890 | NM_005843    | STAM2        | signal transducing adaptor molecu  | 0.097  | 1.070 | 5.57E-01 | 5.57E+01 |  |  |
| 8055911 | ENST00000428 | LOC100129449 | PRO2055                            | -0.039 | 0.973 | 9.53E-01 | 9.53E+01 |  |  |
| 8055913 | NM_017892    | PRPF40A      | PRP40 pre-mRNA processing facto    | 0.027  | 1.019 | 8.31E-01 | 8.31E+01 |  |  |
| 8055941 | NM_019845    | RPRM         | reprim, TP53 dependent G2 arre     | 0.027  | 1.019 | 8.84E-01 | 8.84E+01 |  |  |
| 8055952 | NM_006186    | NR4A2        | nuclear receptor subfamily 4, grou | -0.492 | 0.711 | 6.47E-02 | 6.47E+00 |  |  |
| 8055967 | ---          | ---          | ---                                | 0.018  | 1.012 | 9.30E-01 | 9.30E+01 |  |  |
| 8055978 | NM_152789    | FAM133B      | family with sequence similarity 13 | 0.056  | 1.039 | 6.35E-01 | 6.35E+01 |  |  |
| 8055980 | NM_004288    | CYTIP        | cytohesin 1 interacting protein    | -0.225 | 0.856 | 9.72E-03 | 9.72E-01 |  |  |
| 8055992 | NM_145259    | ACVR1C       | activin A receptor, type IC        | -0.114 | 0.924 | 6.88E-01 | 6.88E+01 |  |  |
| 8056005 | NM_001105    | ACVR1        | activin A receptor, type I         | -0.044 | 0.970 | 8.37E-01 | 8.37E+01 |  |  |
| 8056041 | ---          | ---          | ---                                | -0.041 | 0.972 | 7.51E-01 | 7.51E+01 |  |  |
| 8056045 | ---          | ---          | ---                                | 0.051  | 1.036 | 8.43E-01 | 8.43E+01 |  |  |
| 8056047 | NM_00112821  | WDSUB1       | WD repeat, sterile alpha motif and | -0.022 | 0.985 | 9.33E-01 | 9.33E+01 |  |  |
| 8056060 | NM_013450    | BAZ2B        | bromodomain adjacent to zinc fin   | 0.225  | 1.169 | 2.01E-01 | 2.01E+01 |  |  |

|         |             |              |                                      |        |       |          |          |  |  |
|---------|-------------|--------------|--------------------------------------|--------|-------|----------|----------|--|--|
| 8056102 | NM_014880   | CD302        | CD302 molecule                       | 0.102  | 1.074 | 6.57E-01 | 6.57E+01 |  |  |
| 8056113 | NM_002349   | LY75         | lymphocyte antigen 75                | 0.017  | 1.012 | 9.53E-01 | 9.53E+01 |  |  |
| 8056201 | NM_016836   | RBMS1        | RNA binding motif, single strand     | 0.193  | 1.143 | 2.84E-01 | 2.84E+01 |  |  |
| 8056206 | NM_016836   | RBMS1        | RNA binding motif, single strand     | 0.115  | 1.083 | 2.89E-01 | 2.89E+01 |  |  |
| 8056215 | ---         | ---          | ---                                  | 0.102  | 1.073 | 6.37E-01 | 6.37E+01 |  |  |
| 8056217 | NM_198530   | MXRA7        | matrix-remodelling associated 7      | -0.300 | 0.812 | 5.59E-02 | 5.59E+00 |  |  |
| 8056220 | NM_015446   | AHCTF1       | AT hook containing transcription f   | -0.059 | 0.960 | 7.32E-01 | 7.32E+01 |  |  |
| 8056222 | NM_001935   | DPP4         | dipeptidyl-peptidase 4               | -0.377 | 0.770 | 8.71E-02 | 8.71E+00 |  |  |
| 8056285 | NM_022168   | IFIH1        | interferon induced with helicase C   | 0.221  | 1.166 | 3.65E-01 | 3.65E+01 |  |  |
| 8056426 | NM_024753   | TTC21B       | tetratricopeptide repeat domain 2    | -0.026 | 0.982 | 9.40E-01 | 9.40E+01 |  |  |
| 8056545 | NM_013233   | STK39        | serine threonine kinase 39 (STE20    | -0.057 | 0.961 | 7.40E-01 | 7.40E+01 |  |  |
| 8056566 | ---         | ---          | ---                                  | 0.137  | 1.100 | 3.69E-01 | 3.69E+01 |  |  |
| 8056716 | NM_014168   | METTL5       | methyltransferase like 5             | -0.097 | 0.935 | 3.69E-01 | 3.69E+01 |  |  |
| 8056728 | ---         | ---          | ---                                  | 0.018  | 1.013 | 9.24E-01 | 9.24E+01 |  |  |
| 8056734 | NM_012290   | TLK1         | tousled-like kinase 1                | -0.022 | 0.985 | 9.09E-01 | 9.09E+01 |  |  |
| 8056753 | NM_024770   | METTL8       | methyltransferase like 8             | -0.097 | 0.935 | 3.98E-01 | 3.98E+01 |  |  |
| 8056763 | ---         | ---          | ---                                  | -0.002 | 0.998 | 9.91E-01 | 9.91E+01 |  |  |
| 8056766 | NM_003705   | SLC25A12     | solute carrier family 25 (mitochond  | 0.075  | 1.054 | 6.33E-01 | 6.33E+01 |  |  |
| 8056784 | NM_004405   | DLX2         | distal-less homeobox 2               | -0.044 | 0.970 | 7.29E-01 | 7.29E+01 |  |  |
| 8056792 | ---         | ---          | ---                                  | 0.079  | 1.057 | 7.70E-01 | 7.70E+01 |  |  |
| 8056798 | NM_003111   | SP3          | Sp3 transcription factor             | -0.021 | 0.986 | 8.58E-01 | 8.58E+01 |  |  |
| 8056810 | AK095037    | LOC100129312 | hypothetical LOC100129312            | 0.011  | 1.007 | 9.56E-01 | 9.56E+01 |  |  |
| 8056812 | NM_013341   | OLA1         | Obg-like ATPase 1                    | -0.052 | 0.965 | 7.87E-01 | 7.87E+01 |  |  |
| 8056821 | ---         | ---          | ---                                  | 0.029  | 1.020 | 9.00E-01 | 9.00E+01 |  |  |
| 8056825 | NM_00114525 | SP9          | Sp9 transcription factor homolog     | -0.054 | 0.963 | 6.51E-01 | 6.51E+01 |  |  |
| 8056829 | NM_004882   | CIR1         | corepressor interacting with RBPJ    | 0.096  | 1.069 | 5.35E-01 | 5.35E+01 |  |  |
| 8056837 | NM_00103304 | GPR155       | G protein-coupled receptor 155       | -0.042 | 0.971 | 8.83E-01 | 8.83E+01 |  |  |
| 8056860 | NM_003387   | WIPF1        | WAS/WASL interacting protein fam     | 0.053  | 1.038 | 6.27E-01 | 6.27E+01 |  |  |
| 8056909 | NM_001880   | ATF2         | activating transcription factor 2    | 0.022  | 1.015 | 8.80E-01 | 8.80E+01 |  |  |
| 8056930 | NM_001689   | ATP5G3       | ATP synthase, H+ transporting, mi    | 0.050  | 1.035 | 5.98E-01 | 5.98E+01 |  |  |
| 8056959 | NM_00108045 | EVX2         | even-skipped homeobox 2              | -0.027 | 0.981 | 8.38E-01 | 8.38E+01 |  |  |
| 8056966 | ---         | ---          | ---                                  | -0.017 | 0.988 | 9.53E-01 | 9.53E+01 |  |  |
| 8056972 | ---         | ---          | ---                                  | 0.060  | 1.043 | 4.63E-01 | 4.63E+01 |  |  |
| 8056977 | NM_006164   | NFE2L2       | nuclear factor (erythroid-derived 2  | -0.100 | 0.933 | 4.34E-01 | 4.34E+01 |  |  |
| 8056993 | ---         | ---          | ---                                  | 0.061  | 1.043 | 8.84E-01 | 8.84E+01 |  |  |
| 8057034 | NM_003690   | PRKRA        | protein kinase, interferon-inducib   | -0.033 | 0.978 | 8.78E-01 | 8.78E+01 |  |  |
| 8057056 | NM_133378   | TTN          | titin                                | 0.074  | 1.052 | 6.40E-01 | 6.40E+01 |  |  |
| 8057377 | NM_173648   | CCDC141      | coiled-coil domain containing 141    | 0.115  | 1.083 | 5.99E-01 | 5.99E+01 |  |  |
| 8057394 | NM_178123   | SESTD1       | SEC14 and spectrin domains 1         | 0.109  | 1.079 | 7.15E-01 | 7.15E+01 |  |  |
| 8057439 | ---         | ---          | ---                                  | 0.008  | 1.005 | 9.77E-01 | 9.77E+01 |  |  |
| 8057441 | NM_020943   | CWC22        | CWC22 spliceosome-associated pr      | 0.001  | 1.001 | 9.94E-01 | 9.94E+01 |  |  |
| 8057463 | NM_201548   | CERKL        | ceramide kinase-like                 | 0.116  | 1.084 | 1.91E-01 | 1.91E+01 |  |  |
| 8057554 | NM_014412   | CACYBP       | calcyclin binding protein            | -0.118 | 0.922 | 3.90E-01 | 3.90E+01 |  |  |
| 8057561 | NM_018471   | ZC3H15       | zinc finger CCHH-type containing 1   | 0.005  | 1.003 | 9.83E-01 | 9.83E+01 |  |  |
| 8057613 | ---         | ---          | ---                                  | 0.009  | 1.006 | 9.74E-01 | 9.74E+01 |  |  |
| 8057689 | NM_022353   | OSGEPL1      | O-sialoglycoprotein endopeptidas     | 0.116  | 1.084 | 4.65E-01 | 4.65E+01 |  |  |
| 8057700 | NM_016467   | ORMDL1       | ORM1-like 1 (S. cerevisiae)          | -0.036 | 0.975 | 8.32E-01 | 8.32E+01 |  |  |
| 8057719 | NM_014362   | HIBCH        | 3-hydroxyisobutyryl-Coenzyme A       | -0.006 | 0.996 | 9.85E-01 | 9.85E+01 |  |  |
| 8057732 | NM_00114264 | TMEM194B     | transmembrane protein 194B           | 0.066  | 1.046 | 8.24E-01 | 8.24E+01 |  |  |
| 8057744 | NM_007315   | STAT1        | signal transducer and activator of   | 0.270  | 1.206 | 1.01E-01 | 1.01E+01 |  |  |
| 8057771 | NM_003151   | STAT4        | signal transducer and activator of   | -0.140 | 0.908 | 4.04E-01 | 4.04E+01 |  |  |
| 8057887 | NM_004226   | STK17B       | serine/threonine kinase 17b          | 0.010  | 1.007 | 9.56E-01 | 9.56E+01 |  |  |
| 8057931 | ---         | ---          | ---                                  | 0.041  | 1.029 | 8.10E-01 | 8.10E+01 |  |  |
| 8057933 | NM_012086   | GTF3C3       | general transcription factor IIIC, p | 0.052  | 1.037 | 7.59E-01 | 7.59E+01 |  |  |
| 8057990 | NM_153697   | ANKRD44      | ankyrin repeat domain 44             | 0.194  | 1.144 | 6.53E-03 | 6.53E-01 |  |  |
| 8058024 | NM_012433   | SF3B1        | splicing factor 3b, subunit 1, 155k  | -0.004 | 0.997 | 9.77E-01 | 9.77E+01 |  |  |
| 8058052 | NM_002156   | HSPD1        | heat shock 60kDa protein 1 (chape    | -0.072 | 0.952 | 6.38E-01 | 6.38E+01 |  |  |
| 8058091 | NM_015265   | SATB2        | SATB homeobox 2                      | 0.000  | 1.000 | 1.00E+00 | 1.00E+02 |  |  |
| 8058118 | NM_152387   | KCTD18       | potassium channel tetramerisation    | 0.015  | 1.011 | 9.51E-01 | 9.51E+01 |  |  |
| 8058127 | NR_027856   | CLK1         | CDC-like kinase 1                    | -0.078 | 0.947 | 4.29E-01 | 4.29E+01 |  |  |
| 8058145 | ---         | ---          | ---                                  | -0.133 | 0.912 | 3.97E-01 | 3.97E+01 |  |  |
| 8058147 | NM_131916   | PPIL3        | peptidylprolyl isomerase (cycloph    | 0.044  | 1.031 | 8.79E-01 | 8.79E+01 |  |  |
| 8058161 | NM_006190   | ORC2L        | origin recognition complex, subun    | -0.028 | 0.981 | 8.53E-01 | 8.53E+01 |  |  |
| 8058182 | NM_173822   | FAM126B      | family with sequence similarity 12   | 0.061  | 1.043 | 7.63E-01 | 7.63E+01 |  |  |
| 8058197 | ---         | ---          | ---                                  | 0.280  | 1.214 | 2.59E-01 | 2.59E+01 |  |  |
| 8058201 | ---         | ---          | ---                                  | -0.076 | 0.949 | 8.07E-01 | 8.07E+01 |  |  |
| 8058203 | NM_139163   | ALS2CR12     | amyotrophic lateral sclerosis 2 (juv | -0.178 | 0.884 | 1.29E-01 | 1.29E+01 |  |  |
| 8058221 | NM_015049   | TRAK2        | trafficking protein, kinesin binding | 0.011  | 1.008 | 9.67E-01 | 9.67E+01 |  |  |
| 8058273 | NM_033066   | MPP4         | membrane protein, palmitoylated      | 0.051  | 1.036 | 7.44E-01 | 7.44E+01 |  |  |
| 8058333 | ---         | ---          | ---                                  | 0.016  | 1.011 | 9.35E-01 | 9.35E+01 |  |  |
| 8058335 | NM_003352   | SUMO1        | SMT3 suppressor of mif two 3 hon     | 0.020  | 1.014 | 9.39E-01 | 9.39E+01 |  |  |
| 8058340 | ---         | ---          | ---                                  | -0.023 | 0.984 | 9.01E-01 | 9.01E+01 |  |  |
| 8058342 | ---         | ---          | ---                                  | 0.017  | 1.012 | 9.71E-01 | 9.71E+01 |  |  |
| 8058348 | ---         | ---          | ---                                  | 0.317  | 1.246 | 5.47E-01 | 5.47E+01 |  |  |
| 8058373 | NM_018256   | WDR12        | WD repeat domain 12                  | 0.024  | 1.017 | 9.44E-01 | 9.44E+01 |  |  |
| 8058388 | ---         | ---          | ---                                  | 0.124  | 1.090 | 8.61E-01 | 8.61E+01 |  |  |
| 8058390 | NM_213589   | RAPH1        | Ras association (RalGDS/AF-6) and    | 0.299  | 1.231 | 5.85E-02 | 5.85E+00 |  |  |

|         |             |          |                                     |        |       |          |          |  |  |
|---------|-------------|----------|-------------------------------------|--------|-------|----------|----------|--|--|
| 8058415 | NM_017759   | INO80D   | INO80 complex subunit D             | -0.081 | 0.946 | 5.38E-01 | 5.38E+01 |  |  |
| 8058428 | NM_005006   | NDUFS1   | NADH dehydrogenase (ubiquinone)     | 0.032  | 1.023 | 8.51E-01 | 8.51E+01 |  |  |
| 8058458 | ---         | ---      | ---                                 | -0.023 | 0.984 | 9.30E-01 | 9.30E+01 |  |  |
| 8058477 | NM_003709   | KLF7     | Kruppel-like factor 7 (ubiquitous)  | -0.058 | 0.961 | 8.27E-01 | 8.27E+01 |  |  |
| 8058486 | NM_145280   | FAM119A  | family with sequence similarity 11  | 0.010  | 1.007 | 9.56E-01 | 9.56E+01 |  |  |
| 8058496 | ---         | ---      | ---                                 | 0.076  | 1.054 | 8.18E-01 | 8.18E+01 |  |  |
| 8058509 | NM_00108047 | PLEKHM3  | pleckstrin homology domain conta    | -0.089 | 0.940 | 7.99E-01 | 7.99E+01 |  |  |
| 8058512 | NM_00108047 | PLEKHM3  | pleckstrin homology domain conta    | -0.198 | 0.872 | 1.47E-01 | 1.47E+01 |  |  |
| 8058514 | ---         | ---      | ---                                 | 0.109  | 1.079 | 6.76E-01 | 6.76E+01 |  |  |
| 8058516 | ---         | ---      | ---                                 | -0.074 | 0.950 | 6.74E-01 | 6.74E+01 |  |  |
| 8058518 | ---         | ---      | ---                                 | -0.038 | 0.974 | 8.92E-01 | 8.92E+01 |  |  |
| 8058524 | NM_020989   | CRYGC    | crystallin, gamma C                 | 0.006  | 1.004 | 9.76E-01 | 9.76E+01 |  |  |
| 8058614 | NM_006055   | LANCL1   | LanC lantibiotic synthetase compo   | -0.027 | 0.982 | 9.19E-01 | 9.19E+01 |  |  |
| 8058664 | ---         | ---      | ---                                 | 0.077  | 1.055 | 8.48E-01 | 8.48E+01 |  |  |
| 8058670 | NM_016260   | IKZF2    | IKAROS family zinc finger 2 (Helios | -0.010 | 0.993 | 9.84E-01 | 9.84E+01 |  |  |
| 8058837 | NM_018441   | PECR     | peroxisomal trans-2-enoyl-CoA re    | -0.053 | 0.964 | 8.45E-01 | 8.45E+01 |  |  |
| 8058849 | NM_020814   | 40241    | membrane-associated ring finger     | -0.048 | 0.967 | 4.93E-01 | 4.93E+01 |  |  |
| 8058855 | ---         | ---      | ---                                 | 0.130  | 1.094 | 1.01E-01 | 1.01E+01 |  |  |
| 8058866 | NM_003284   | TNP1     | transition protein 1 (during histon | 0.055  | 1.039 | 6.95E-01 | 6.95E+01 |  |  |
| 8058869 | NM_022648   | TNS1     | tensin 1                            | 0.142  | 1.103 | 1.85E-01 | 1.85E+01 |  |  |
| 8058914 | NM_001087   | AAMP     | angio-associated, migratory cell pr | 0.003  | 1.002 | 9.87E-01 | 9.87E+01 |  |  |
| 8058927 | NM_022152   | TMBIM1   | transmembrane BAX inhibitor mot     | 0.119  | 1.086 | 6.89E-01 | 6.89E+01 |  |  |
| 8058940 | NM_020935   | USP37    | ubiquitin specific peptidase 37     | 0.026  | 1.018 | 9.22E-01 | 9.22E+01 |  |  |
| 8058969 | ---         | ---      | ---                                 | 0.057  | 1.040 | 9.05E-01 | 9.05E+01 |  |  |
| 8058973 | NM_00110553 | ZNF142   | zinc finger protein 142             | -0.097 | 0.935 | 2.96E-01 | 2.96E+01 |  |  |
| 8058985 | NM_022453   | RNF25    | ring finger protein 25              | -0.074 | 0.950 | 6.74E-01 | 6.74E+01 |  |  |
| 8058997 | NM_017431   | PRKAG3   | protein kinase, AMP-activated, ga   | -0.031 | 0.979 | 8.03E-01 | 8.03E+01 |  |  |
| 8059012 | ---         | ---      | ---                                 | 0.133  | 1.096 | 1.48E-01 | 1.48E+01 |  |  |
| 8059014 | NM_017521   | FEV      | FEV (ETS oncogene family)           | -0.074 | 0.950 | 4.83E-01 | 4.83E+01 |  |  |
| 8059019 | NM_057093   | CRYBA2   | crystallin, beta A2                 | -0.004 | 0.997 | 9.84E-01 | 9.84E+01 |  |  |
| 8059026 | ---         | ---      | ---                                 | -0.037 | 0.974 | 8.11E-01 | 8.11E+01 |  |  |
| 8059028 | NM_194302   | CCDC108  | coiled-coil domain containing 108   | -0.006 | 0.996 | 9.58E-01 | 9.58E+01 |  |  |
| 8059067 | NM_002181   | IHH      | Indian hedgehog homolog (Drosoph    | -0.039 | 0.973 | 8.37E-01 | 8.37E+01 |  |  |
| 8059071 | NM_024782   | NHEJ1    | nonhomologous end-joining facto     | -0.066 | 0.955 | 7.05E-01 | 7.05E+01 |  |  |
| 8059081 | NM_00114488 | SLC23A3  | solute carrier family 23 (nucleoba  | -0.105 | 0.930 | 3.39E-01 | 3.39E+01 |  |  |
| 8059097 | NM_015680   | C2orf24  | chromosome 2 open reading fram      | -0.092 | 0.938 | 4.04E-01 | 4.04E+01 |  |  |
| 8059111 | NM_005689   | ABCB6    | ATP-binding cassette, sub-family B  | -0.027 | 0.982 | 8.67E-01 | 8.67E+01 |  |  |
| 8059139 | NM_00107719 | ATG9A    | ATG9 autophagy related 9 homolo     | 0.036  | 1.025 | 8.05E-01 | 8.05E+01 |  |  |
| 8059158 | NM_024506   | GLB1L    | galactosidase, beta 1-like          | 0.120  | 1.086 | 4.43E-01 | 4.43E+01 |  |  |
| 8059177 | NM_006000   | TUBA4A   | tubulin, alpha 4a                   | -0.029 | 0.980 | 9.05E-01 | 9.05E+01 |  |  |
| 8059186 | NM_002846   | PTPRN    | protein tyrosine phosphatase, rec   | 0.012  | 1.008 | 9.48E-01 | 9.48E+01 |  |  |
| 8059222 | NM_012100   | DNPEP    | aspartyl aminopeptidase             | 0.024  | 1.017 | 8.52E-01 | 8.52E+01 |  |  |
| 8059244 | NM_024536   | CHPF     | chondroitin polymerizing factor     | -0.028 | 0.981 | 8.66E-01 | 8.66E+01 |  |  |
| 8059279 | NM_004438   | EPHA4    | EPH receptor A4                     | -0.095 | 0.936 | 6.63E-01 | 6.63E+01 |  |  |
| 8059319 | NM_005687   | FARSB    | phenylalanyl-tRNA synthetase, be    | 0.085  | 1.061 | 7.51E-01 | 7.51E+01 |  |  |
| 8059339 | ---         | ---      | ---                                 | -0.030 | 0.979 | 8.78E-01 | 8.78E+01 |  |  |
| 8059361 | NM_020830   | WDFY1    | WD repeat and FYVE domain conta     | 0.237  | 1.178 | 3.84E-02 | 3.84E+00 |  |  |
| 8059376 | NM_00113652 | SERPINE2 | serpin peptidase inhibitor, clade E | -0.009 | 0.994 | 9.86E-01 | 9.86E+01 |  |  |
| 8059387 | NM_024785   | FAM124B  | family with sequence similarity 12  | 0.009  | 1.006 | 9.64E-01 | 9.64E+01 |  |  |
| 8059393 | NM_003590   | CUL3     | cullin 3                            | 0.026  | 1.018 | 8.30E-01 | 8.30E+01 |  |  |
| 8059413 | NM_014689   | DOCK10   | dedicator of cytokinesis 10         | 0.198  | 1.147 | 1.37E-03 | 1.37E-01 |  |  |
| 8059475 | ---         | ---      | ---                                 | 0.124  | 1.090 | 3.92E-01 | 3.92E+01 |  |  |
| 8059565 | NM_017933   | PID1     | phosphotyrosine interaction doma    | -0.834 | 0.561 | 5.88E-02 | 5.88E+00 |  |  |
| 8059576 | ---         | ---      | ---                                 | -0.007 | 0.995 | 9.73E-01 | 9.73E+01 |  |  |
| 8059580 | NM_139072   | DNER     | delta/notch-like EGF repeat conta   | -0.180 | 0.883 | 5.28E-02 | 5.28E+00 |  |  |
| 8059596 | NM_004238   | TRIP12   | thyroid hormone receptor interac    | -0.046 | 0.969 | 6.74E-01 | 6.74E+01 |  |  |
| 8059648 | ---         | ---      | ---                                 | -0.007 | 0.995 | 9.91E-01 | 9.91E+01 |  |  |
| 8059650 | NM_080424   | SP110    | SP110 nuclear body protein          | 0.179  | 1.132 | 8.71E-02 | 8.71E+00 |  |  |
| 8059672 | ---         | ---      | ---                                 | -0.145 | 0.904 | 3.04E-01 | 3.04E+01 |  |  |
| 8059674 | NM_005683   | GPR55    | G protein-coupled receptor 55       | 0.064  | 1.045 | 6.43E-01 | 6.43E+01 |  |  |
| 8059680 | NM_000867   | HTR2B    | 5-hydroxytryptamine (serotonin) r   | -0.132 | 0.913 | 5.04E-01 | 5.04E+01 |  |  |
| 8059687 | ---         | ---      | ---                                 | 0.200  | 1.149 | 5.38E-01 | 5.38E+01 |  |  |
| 8059689 | NM_005381   | NCL      | nucleolin                           | -0.037 | 0.975 | 6.58E-01 | 6.58E+01 |  |  |
| 8059708 | NR_002921   | SNORA75  | small nucleolar RNA, H/ACA box 7    | 0.024  | 1.017 | 9.71E-01 | 9.71E+01 |  |  |
| 8059712 | NR_004398   | SNORD82  | small nucleolar RNA, C/D box 82     | -0.133 | 0.912 | 6.14E-01 | 6.14E+01 |  |  |
| 8059716 | BC033054    | C2orf52  | chromosome 2 open reading fram      | -0.088 | 0.941 | 7.06E-01 | 7.06E+01 |  |  |
| 8059720 | NM_006056   | NMUR1    | neuromedin U receptor 1             | 0.011  | 1.008 | 9.28E-01 | 9.28E+01 |  |  |
| 8059731 | NM_002601   | PDE6D    | phosphodiesterase 6D, cGMP-spe      | -0.086 | 0.942 | 5.65E-01 | 5.65E+01 |  |  |
| 8059739 | NM_024409   | NPPC     | natriuretic peptide precursor C     | 0.035  | 1.025 | 7.97E-01 | 7.97E+01 |  |  |
| 8059744 | BC067110    | ECEL1P2  | endothelin converting enzyme-like   | -0.055 | 0.963 | 5.58E-01 | 5.58E+01 |  |  |
| 8059748 | NM_004826   | ECEL1    | endothelin converting enzyme-like   | -0.017 | 0.988 | 9.00E-01 | 9.00E+01 |  |  |
| 8059770 | NM_145702   | TIGD1    | tigger transposable element deriv   | -0.058 | 0.961 | 8.29E-01 | 8.29E+01 |  |  |
| 8059776 | NM_002242   | KCNJ13   | potassium inwardly-rectifying cha   | 0.078  | 1.055 | 7.14E-01 | 7.14E+01 |  |  |
| 8059783 | NM_019850   | NGEF     | neuronal guanine nucleotide exch    | -0.033 | 0.977 | 7.75E-01 | 7.75E+01 |  |  |
| 8059799 | ---         | ---      | ---                                 | 0.153  | 1.112 | 5.83E-01 | 5.83E+01 |  |  |
| 8059838 | NM_018410   | HJURP    | Holliday junction recognition prot  | 0.160  | 1.117 | 2.54E-01 | 2.54E+01 |  |  |
| 8059852 | NR_024322   | MSL3L2   | male-specific lethal 3-like 2 (Dros | 0.041  | 1.028 | 9.24E-01 | 9.24E+01 |  |  |

|         |             |           |                                     |        |       |          |          |  |  |
|---------|-------------|-----------|-------------------------------------|--------|-------|----------|----------|--|--|
| 8059854 | NM_005737   | ARL4C     | ADP-ribosylation factor-like 4C     | -0.101 | 0.933 | 4.13E-01 | 4.13E+01 |  |  |
| 8059864 | NM_001485   | GBX2      | gastrulation brain homeobox 2       | 0.011  | 1.008 | 9.52E-01 | 9.52E+01 |  |  |
| 8059868 | NM_212556   | ASB18     | ankyrin repeat and SOCS box-cont    | -0.059 | 0.960 | 5.67E-01 | 5.67E+01 |  |  |
| 8059900 | ---         | ---       | ---                                 | 0.120  | 1.086 | 2.65E-01 | 2.65E+01 |  |  |
| 8059955 | NM_022449   | RAB17     | RAB17, member RAS oncogene fa       | 0.055  | 1.039 | 6.59E-01 | 6.59E+01 |  |  |
| 8059969 | NM_030768   | ILKAP     | integrin-linked kinase-associated s | -0.009 | 0.994 | 9.77E-01 | 9.77E+01 |  |  |
| 8059985 | NR_026925   | LOC151174 | hypothetical LOC151174              | -0.077 | 0.948 | 4.51E-01 | 4.51E+01 |  |  |
| 8059989 | NM_018645   | HES6      | hairy and enhancer of split 6 (Dros | 0.043  | 1.030 | 7.23E-01 | 7.23E+01 |  |  |
| 8059996 | NM_022817   | PER2      | period homolog 2 (Drosophila)       | 0.094  | 1.067 | 3.94E-01 | 3.94E+01 |  |  |
| 8060030 | NM_006037   | HDAC4     | histone deacetylase 4               | -0.054 | 0.963 | 6.29E-01 | 6.29E+01 |  |  |
| 8060061 | NR_026664   | MGC16025  | hypothetical LOC85009               | -0.031 | 0.979 | 8.41E-01 | 8.41E+01 |  |  |
| 8060063 | NM_004544   | NDUFA10   | NADH dehydrogenase (ubiquinone      | -0.055 | 0.962 | 6.04E-01 | 6.04E+01 |  |  |
| 8060082 | NM_00108083 | PRR21     | proline rich 21                     | -0.034 | 0.976 | 7.45E-01 | 7.45E+01 |  |  |
| 8060086 | AF487338    | MYEOV2    | myeloma overexpressed 2             | -0.046 | 0.969 | 7.23E-01 | 7.23E+01 |  |  |
| 8060094 | NM_148961   | OTOS      | otospiralin                         | -0.069 | 0.953 | 3.76E-01 | 3.76E+01 |  |  |
| 8060101 | AK092442    | PP14571   | similar to hCG1777210               | -0.040 | 0.973 | 7.27E-01 | 7.27E+01 |  |  |
| 8060103 | NM_016552   | ANKMY1    | ankyrin repeat and MYND domain      | 0.029  | 1.020 | 8.27E-01 | 8.27E+01 |  |  |
| 8060126 | NM_198998   | AQP12A    | aquaporin 12A                       | 0.032  | 1.023 | 7.09E-01 | 7.09E+01 |  |  |
| 8060187 | NM_00108543 | C2orf54   | chromosome 2 open reading fram      | -0.050 | 0.966 | 7.14E-01 | 7.14E+01 |  |  |
| 8060196 | NM_182501   | MTERFD2   | MTERF domain containing 2           | -0.058 | 0.961 | 8.26E-01 | 8.26E+01 |  |  |
| 8060205 | NM_015148   | PASK      | PAS domain containing serine/thre   | -0.102 | 0.932 | 5.63E-01 | 5.63E+01 |  |  |
| 8060225 | NM_203346   | HDLBP     | high density lipoprotein binding pr | -0.046 | 0.969 | 7.92E-01 | 7.92E+01 |  |  |
| 8060257 | NM_006374   | STK25     | serine/threonine kinase 25 (STE20   | -0.047 | 0.968 | 6.66E-01 | 6.66E+01 |  |  |
| 8060274 | NM_015963   | THAP4     | THAP domain containing 4            | 0.000  | 1.000 | 1.00E+00 | 1.00E+02 |  |  |
| 8060286 | NM_012145   | DTYMK     | deoxythymidylate kinase (thymidy    | -0.032 | 0.978 | 8.87E-01 | 8.87E+01 |  |  |
| 8060294 | NM_005018   | PDCD1     | programmed cell death 1             | -0.033 | 0.977 | 7.69E-01 | 7.69E+01 |  |  |
| 8060325 | NM_207469   | DEFB132   | defensin, beta 132                  | 0.021  | 1.015 | 8.87E-01 | 8.87E+01 |  |  |
| 8060330 | NM_033089   | ZCCHC3    | zinc finger, CCHC domain containi   | -0.063 | 0.958 | 4.73E-01 | 4.73E+01 |  |  |
| 8060334 | NM_006943   | SOX12     | SRY (sex determining region Y)-box  | -0.093 | 0.937 | 2.52E-01 | 2.52E+01 |  |  |
| 8060339 | NM_024958   | NRSN2     | neurensin 2                         | 0.021  | 1.015 | 9.07E-01 | 9.07E+01 |  |  |
| 8060344 | NM_021158   | TRIB3     | tribbles homolog 3 (Drosophila)     | -0.024 | 0.983 | 8.55E-01 | 8.55E+01 |  |  |
| 8060353 | NM_031229   | RBCK1     | RanBP-type and C3HC4-type zinc fi   | 0.041  | 1.028 | 7.52E-01 | 7.52E+01 |  |  |
| 8060370 | NM_031424   | FAM110A   | family with sequence similarity 11  | -0.105 | 0.930 | 3.15E-01 | 3.15E+01 |  |  |
| 8060379 | NM_178578   | PSMF1     | proteasome (prosome, macropain)     | 0.129  | 1.093 | 1.39E-01 | 1.39E+01 |  |  |
| 8060418 | NM_00104002 | SIRPA     | signal-regulatory protein alpha     | 0.269  | 1.205 | 3.41E-01 | 3.41E+01 |  |  |
| 8060427 | NM_080836   | STK35     | serine/threonine kinase 35          | -0.113 | 0.925 | 2.37E-01 | 2.37E+01 |  |  |
| 8060447 | NM_198994   | TGM6      | transglutaminase 6                  | -0.002 | 0.999 | 9.90E-01 | 9.90E+01 |  |  |
| 8060484 | NR_027700   | NOP56     | NOP56 ribonucleoprotein homolo      | 0.013  | 1.009 | 9.66E-01 | 9.66E+01 |  |  |
| 8060501 | NR_002981   | SNORA51   | small nucleolar RNA, H/ACA box 5    | 0.006  | 1.004 | 9.85E-01 | 9.85E+01 |  |  |
| 8060503 | NR_002738   | SNORD57   | small nucleolar RNA, C/D box 57     | 0.087  | 1.062 | 7.59E-01 | 7.59E+01 |  |  |
| 8060505 | NM_00111051 | EBF4      | early B-cell factor 4               | -0.056 | 0.962 | 5.34E-01 | 5.34E+01 |  |  |
| 8060528 | NM_080739   | C20orf141 | chromosome 20 open reading fram     | 0.018  | 1.013 | 8.99E-01 | 8.99E+01 |  |  |
| 8060533 | BC021178    | C20orf141 | chromosome 20 open reading fram     | -0.023 | 0.984 | 8.81E-01 | 8.81E+01 |  |  |
| 8060539 | NM_002836   | PTPRA     | protein tyrosine phosphatase, rec   | -0.005 | 0.996 | 9.65E-01 | 9.65E+01 |  |  |
| 8060594 | NM_001501   | GNRH2     | gonadotropin-releasing hormone 2    | 0.011  | 1.008 | 9.44E-01 | 9.44E+01 |  |  |
| 8060599 | NM_030811   | MRPS26    | mitochondrial ribosomal protein S   | -0.052 | 0.965 | 5.68E-01 | 5.68E+01 |  |  |
| 8060604 | NM_000915   | OXT       | oxytocin, prepropeptide             | -0.115 | 0.923 | 1.30E-01 | 1.30E+01 |  |  |
| 8060609 | ---         | ---       | ---                                 | 0.021  | 1.014 | 8.47E-01 | 8.47E+01 |  |  |
| 8060611 | NM_033453   | ITPA      | inosine triphosphatase (nucleoside  | 0.142  | 1.104 | 1.22E-01 | 1.22E+01 |  |  |
| 8060627 | NM_139321   | ATRNL     | atractin                            | 0.127  | 1.092 | 2.15E-01 | 2.15E+01 |  |  |
| 8060660 | NM_052970   | HSPA12B   | heat shock 70kD protein 12B         | -0.039 | 0.973 | 7.03E-01 | 7.03E+01 |  |  |
| 8060675 | NM_021873   | CDC25B    | cell division cycle 25 homolog B (S | 0.091  | 1.065 | 5.26E-01 | 5.26E+01 |  |  |
| 8060698 | BC043344    | C20orf29  | chromosome 20 open reading fram     | -0.129 | 0.914 | 1.58E-01 | 1.58E+01 |  |  |
| 8060705 | NM_020746   | MAVS      | mitochondrial antiviral signaling p | -0.061 | 0.959 | 4.96E-01 | 4.96E+01 |  |  |
| 8060722 | NM_153638   | PANK2     | pantothenate kinase 2               | 0.040  | 1.028 | 7.19E-01 | 7.19E+01 |  |  |
| 8060734 | ---         | ---       | ---                                 | -0.055 | 0.963 | 8.76E-01 | 8.76E+01 |  |  |
| 8060736 | ---         | ---       | ---                                 | 0.165  | 1.121 | 7.05E-02 | 7.05E+00 |  |  |
| 8060738 | ---         | ---       | ---                                 | 0.282  | 1.216 | 6.76E-02 | 6.76E+00 |  |  |
| 8060745 | NM_175839   | SMOX      | spermine oxidase                    | -0.203 | 0.869 | 9.26E-02 | 9.26E+00 |  |  |
| 8060758 | NM_000311   | PRNP      | prion protein                       | -0.036 | 0.975 | 8.10E-01 | 8.10E+01 |  |  |
| 8060765 | NM_012409   | PRND      | prion protein 2 (dublet)            | -0.009 | 0.994 | 9.64E-01 | 9.64E+01 |  |  |
| 8060772 | NM_003818   | CDS2      | CDP-diacylglycerol synthase (phos   | 0.001  | 1.001 | 9.96E-01 | 9.96E+01 |  |  |
| 8060792 | AK125948    | LOC643406 | hypothetical protein LOC643406      | -0.006 | 0.996 | 9.81E-01 | 9.81E+01 |  |  |
| 8060796 | BC035800    | C20orf196 | chromosome 20 open reading fram     | 0.109  | 1.079 | 3.85E-01 | 3.85E+01 |  |  |
| 8060803 | ---         | ---       | ---                                 | 0.087  | 1.062 | 3.79E-01 | 3.79E+01 |  |  |
| 8060805 | NM_001819   | CHGB      | chromogranin B (secretogranin 1)    | -0.219 | 0.859 | 4.96E-01 | 4.96E+01 |  |  |
| 8060813 | NM_032485   | MCM8      | minichromosome maintenance co       | -0.025 | 0.983 | 9.49E-01 | 9.49E+01 |  |  |
| 8060837 | ---         | ---       | ---                                 | 0.023  | 1.016 | 9.49E-01 | 9.49E+01 |  |  |
| 8060839 | NM_019095   | CRLS1     | cardiolipin synthase 1              | 0.101  | 1.073 | 4.79E-01 | 4.79E+01 |  |  |
| 8060850 | NM_001200   | BMP2      | bone morphogenetic protein 2        | -0.013 | 0.991 | 9.53E-01 | 9.53E+01 |  |  |
| 8060854 | NM_182734   | PLCB1     | phospholipase C, beta 1 (phospho    | -0.008 | 0.994 | 9.83E-01 | 9.83E+01 |  |  |
| 8060895 | NR_004386   | RNU105B   | RNA, U105B small nucleolar          | 0.047  | 1.033 | 8.42E-01 | 8.42E+01 |  |  |
| 8060949 | NM_022096   | ANKRD5    | ankyrin repeat domain 5             | -0.083 | 0.944 | 7.33E-01 | 7.33E+01 |  |  |
| 8060977 | NM_00100960 | C20orf94  | chromosome 20 open reading fram     | 0.089  | 1.063 | 7.52E-01 | 7.52E+01 |  |  |
| 8060988 | NM_014962   | BTBD3     | BTB (POZ) domain containing 3       | 0.099  | 1.071 | 6.76E-01 | 6.76E+01 |  |  |
| 8061019 | NM_024120   | C20orf7   | chromosome 20 open reading fram     | 0.024  | 1.017 | 9.18E-01 | 9.18E+01 |  |  |
| 8061035 | NM_080676   | MACROD2   | MACRO domain containing 2           | 0.030  | 1.021 | 8.70E-01 | 8.70E+01 |  |  |

|         |                            |              |                                      |        |       |          |          |  |  |
|---------|----------------------------|--------------|--------------------------------------|--------|-------|----------|----------|--|--|
| 8061073 | ---                        | ---          | ---                                  | 0.135  | 1.098 | 3.83E-01 | 3.83E+01 |  |  |
| 8061075 | NM_003092                  | SNRPB2       | small nuclear ribonucleoprotein p    | -0.055 | 0.962 | 8.21E-01 | 8.21E+01 |  |  |
| 8061112 | ---                        | ---          | ---                                  | 0.030  | 1.021 | 8.84E-01 | 8.84E+01 |  |  |
| 8061114 | NM_00101154                | DSTN         | destrin (actin depolymerizing facto  | -0.089 | 0.940 | 5.70E-01 | 5.70E+01 |  |  |
| 8061129 | BC016869                   | C20orf72     | chromosome 20 open reading fram      | 0.240  | 1.181 | 8.56E-02 | 8.56E+00 |  |  |
| 8061136 | NM_002823                  | PTMA         | prothymosin, alpha                   | -0.017 | 0.988 | 9.45E-01 | 9.45E+01 |  |  |
| 8061138 | NM_020536                  | CSRP2BP      | CSRP2 binding protein                | 0.086  | 1.062 | 4.81E-01 | 4.81E+01 |  |  |
| 8061154 | NM_003434                  | ZNF133       | zinc finger protein 133              | 0.041  | 1.028 | 7.45E-01 | 7.45E+01 |  |  |
| 8061169 | ---                        | ---          | ---                                  | 0.003  | 1.002 | 9.88E-01 | 9.88E+01 |  |  |
| 8061184 | ---                        | ---          | ---                                  | -0.037 | 0.975 | 8.10E-01 | 8.10E+01 |  |  |
| 8061186 | NM_006363                  | SEC23B       | Sec23 homolog B (S. cerevisiae)      | 0.066  | 1.047 | 5.98E-01 | 5.98E+01 |  |  |
| 8061211 | NM_080820                  | DTD1         | D-tyrosyl-tRNA deacylase 1 homol     | -0.055 | 0.962 | 6.64E-01 | 6.64E+01 |  |  |
| 8061222 | ---                        | ---          | ---                                  | 0.062  | 1.044 | 6.67E-01 | 6.67E+01 |  |  |
| 8061227 | NM_020689                  | SLC24A3      | solute carrier family 24 (sodium/p   | -0.163 | 0.893 | 2.00E-01 | 2.00E+01 |  |  |
| 8061262 | NM_016100                  | NAT5         | N-acetyltransferase 5 (GCN5-relat    | 0.052  | 1.037 | 7.47E-01 | 7.47E+01 |  |  |
| 8061303 | NM_002196                  | INSM1        | insulinoma-associated 1              | -0.037 | 0.975 | 7.54E-01 | 7.54E+01 |  |  |
| 8061305 | NM_018474                  | C20orf19     | chromosome 20 open reading fram      | -0.001 | 0.999 | 9.97E-01 | 9.97E+01 |  |  |
| 8061324 | NM_012255                  | XRN2         | 5'-3' exoribonuclease 2              | 0.102  | 1.073 | 2.70E-01 | 2.70E+01 |  |  |
| 8061357 | NM_006192                  | PAX1         | paired box 1                         | -0.015 | 0.989 | 9.20E-01 | 9.20E+01 |  |  |
| 8061364 | NM_021104                  | RPL41        | ribosomal protein L41                | 0.007  | 1.005 | 9.24E-01 | 9.24E+01 |  |  |
| 8061366 | NM_001052                  | SSTR4        | somatostatin receptor 4              | -0.074 | 0.950 | 4.50E-01 | 4.50E+01 |  |  |
| 8061368 | NM_013248                  | NXT1         | NTF2-like export factor 1            | -0.074 | 0.950 | 4.95E-01 | 4.95E+01 |  |  |
| 8061373 | NM_022482                  | GZFI         | GNDF-inducible zinc finger protein   | -0.087 | 0.941 | 4.49E-01 | 4.49E+01 |  |  |
| 8061414 | ---                        | ---          | ---                                  | 0.022  | 1.015 | 8.99E-01 | 8.99E+01 |  |  |
| 8061416 | NM_003650                  | CST7         | cystatin F (leukocystatin)           | 0.028  | 1.020 | 9.56E-01 | 9.56E+01 |  |  |
| 8061426 | ---                        | ---          | ---                                  | 0.179  | 1.132 | 5.38E-01 | 5.38E+01 |  |  |
| 8061428 | NM_001247                  | ENTPD6       | ectonucleoside triphosphate diph     | -0.037 | 0.974 | 8.32E-01 | 8.32E+01 |  |  |
| 8061445 | ---                        | ---          | ---                                  | 0.060  | 1.043 | 6.46E-01 | 6.46E+01 |  |  |
| 8061447 | NM_002862                  | PYGB         | phosphorylase, glycogen; brain       | -0.038 | 0.974 | 7.99E-01 | 7.99E+01 |  |  |
| 8061483 | NR_004846                  | CTD-2514C3.1 | hypothetical LOC100134868            | 0.105  | 1.075 | 4.09E-01 | 4.09E+01 |  |  |
| 8061490 | NR_026713                  | FAM182A      | family with sequence similarity 18   | 0.001  | 1.001 | 9.94E-01 | 9.94E+01 |  |  |
| 8061497 | NR_003579                  | FRG1B        | FSDH region gene 1 family, memb      | -0.031 | 0.978 | 9.07E-01 | 9.07E+01 |  |  |
| 8061519 | NM_153324                  | DEFB123      | defensin, beta 123                   | 0.047  | 1.033 | 6.51E-01 | 6.51E+01 |  |  |
| 8061529 | NM_014012                  | REM1         | RAS (RAD and GEM)-like GTP-bind      | 0.006  | 1.004 | 9.80E-01 | 9.80E+01 |  |  |
| 8061539 | NR_024358                  | NCRNA00028   | non-protein coding RNA 28            | -0.031 | 0.979 | 8.51E-01 | 8.51E+01 |  |  |
| 8061542 | NM_178580                  | HM13         | histocompatibility (minor) 13        | -0.027 | 0.982 | 8.48E-01 | 8.48E+01 |  |  |
| 8061562 | ---                        | ---          | ---                                  | -0.021 | 0.986 | 9.36E-01 | 9.36E+01 |  |  |
| 8061564 | NM_181353                  | ID1          | inhibitor of DNA binding 1, domin    | -0.049 | 0.967 | 6.73E-01 | 6.73E+01 |  |  |
| 8061572 | NM_032609                  | COX4I2       | cytochrome c oxidase subunit IV is   | -0.031 | 0.979 | 8.47E-01 | 8.47E+01 |  |  |
| 8061605 | NM_033118                  | MYLK2        | myosin light chain kinase 2          | 0.047  | 1.033 | 6.66E-01 | 6.66E+01 |  |  |
| 8061620 | NM_00100840                | TTL9         | tubulin tyrosine ligase-like family, | 0.021  | 1.014 | 9.30E-01 | 9.30E+01 |  |  |
| 8061647 | NM_00101171                | XKR7         | XK, Kell blood group complex subu    | -0.029 | 0.980 | 8.30E-01 | 8.30E+01 |  |  |
| 8061653 | NM_080625                  | C20orf160    | chromosome 20 open reading fram      | -0.032 | 0.978 | 7.29E-01 | 7.29E+01 |  |  |
| 8061666 | ---                        | ---          | ---                                  | -0.042 | 0.971 | 8.08E-01 | 8.08E+01 |  |  |
| 8061668 | NM_002110                  | HCK          | hemopoietic cell kinase              | -0.048 | 0.967 | 9.36E-01 | 9.36E+01 |  |  |
| 8061685 | NM_014742                  | TM9SF4       | transmembrane 9 superfamily pro      | -0.210 | 0.864 | 6.92E-02 | 6.92E+00 |  |  |
| 8061706 | NM_015352                  | POFUT1       | protein O-fucosyltransferase 1       | -0.019 | 0.987 | 9.29E-01 | 9.29E+01 |  |  |
| 8061715 | NM_004798                  | KIF3B        | kinesin family member 3B             | -0.264 | 0.833 | 2.41E-03 | 2.41E+01 |  |  |
| 8061725 | NM_015338                  | ASXL1        | additional sex combs like 1 (Droso   | -0.092 | 0.938 | 3.94E-01 | 3.94E+01 |  |  |
| 8061772 | NM_012325                  | MAPRE1       | microtubule-associated protein, R    | 0.079  | 1.056 | 5.48E-01 | 5.48E+01 |  |  |
| 8061780 | NM_025227                  | BPIL1        | bactericidal/permeability-increasi   | -0.040 | 0.972 | 7.03E-01 | 7.03E+01 |  |  |
| 8061815 | NM_182658                  | C20orf185    | chromosome 20 open reading fram      | -0.066 | 0.955 | 5.02E-01 | 5.02E+01 |  |  |
| 8061831 | NM_182519                  | C20orf186    | chromosome 20 open reading fram      | 0.042  | 1.029 | 7.61E-01 | 7.61E+01 |  |  |
| 8061869 | NM_178466                  | C20orf71     | chromosome 20 open reading fram      | 0.059  | 1.042 | 5.58E-01 | 5.58E+01 |  |  |
| 8061881 | ---                        | ---          | ---                                  | -0.039 | 0.973 | 7.35E-01 | 7.35E+01 |  |  |
| 8061883 | NM_130852                  | PLUNC        | palate, lung and nasal epithelium    | -0.023 | 0.984 | 8.91E-01 | 8.91E+01 |  |  |
| 8061894 | NM_033197                  | C20orf114    | chromosome 20 open reading fram      | 0.063  | 1.045 | 4.51E-01 | 4.51E+01 |  |  |
| 8061912 | ---                        | ---          | ---                                  | -0.169 | 0.889 | 3.57E-01 | 3.57E+01 |  |  |
| 8061919 | NM_005093                  | CBFA2T2      | core-binding factor, runt domain,    | -0.038 | 0.974 | 7.86E-01 | 7.86E+01 |  |  |
| 8061940 | DQ080434                   | C20orf144    | chromosome 20 open reading fram      | -0.080 | 0.946 | 4.25E-01 | 4.25E+01 |  |  |
| 8061944 | BC137111                   | C20orf134    | chromosome 20 open reading fram      | -0.071 | 0.952 | 4.82E-01 | 4.82E+01 |  |  |
| 8061946 | NM_032819                  | ZNF341       | zinc finger protein 341              | -0.001 | 0.999 | 9.92E-01 | 9.92E+01 |  |  |
| 8061958 | NM_176812                  | CHMP4B       | chromatin modifying protein 4B       | -0.050 | 0.966 | 5.68E-01 | 5.68E+01 |  |  |
| 8061966 | NM_016732                  | RALY         | RNA binding protein, autoantigen     | -0.014 | 0.990 | 9.37E-01 | 9.37E+01 |  |  |
| 8061982 | NM_001672                  | ASIP         | agouti signaling protein, nonagout   | -0.018 | 0.988 | 9.19E-01 | 9.19E+01 |  |  |
| 8061986 | NM_031483                  | ITCH         | itchy E3 ubiquitin protein ligase h  | 0.062  | 1.044 | 5.23E-01 | 5.23E+01 |  |  |
| 8062016 | NM_014183                  | DYNLRB1      | dynein, light chain, roadblock-type  | -0.003 | 0.998 | 9.86E-01 | 9.86E+01 |  |  |
| 8062023 | NM_032514                  | MAP1LC3A     | microtubule-associated protein 1     | -0.089 | 0.940 | 3.78E-01 | 3.78E+01 |  |  |
| 8062034 | NM_021202                  | TP53INP2     | tumor protein p53 inducible nucle    | -0.133 | 0.912 | 5.46E-02 | 5.46E+00 |  |  |
| 8062041 | NM_018677                  | ACSS2        | acyl-CoA synthetase short-chain fa   | -0.040 | 0.973 | 8.52E-01 | 8.52E+01 |  |  |
| 8062064 | NM_020884                  | MYH7B        | myosin, heavy chain 7B, cardiac m    | -0.007 | 0.995 | 9.56E-01 | 9.56E+01 |  |  |
| 8062108 | NM_006404                  | PROCR        | protein C receptor, endothelial (E   | -0.031 | 0.979 | 8.73E-01 | 8.73E+01 |  |  |
| 8062117 | ---                        | ---          | ---                                  | 0.097  | 1.070 | 8.23E-01 | 8.23E+01 |  |  |
| 8062119 | AF348994 // MT1JP // MT1JJ |              | metallothionein 1J (pseudogene)      | -0.193 | 0.875 | 3.18E-01 | 3.18E+01 |  |  |
| 8062123 | NM_006690                  | MMP24        | matrix metalloproteinase 24 (mem     | -0.044 | 0.970 | 6.75E-01 | 6.75E+01 |  |  |
| 8062137 | NM_007186                  | CEP250       | centrosomal protein 250kDa           | -0.035 | 0.976 | 7.30E-01 | 7.30E+01 |  |  |
| 8062174 | NM_198398                  | ERGIC3       | ERGIC and golgi 3                    | -0.065 | 0.956 | 5.36E-01 | 5.36E+01 |  |  |

|         |              |           |                                                                                 |        |       |          |          |  |  |
|---------|--------------|-----------|---------------------------------------------------------------------------------|--------|-------|----------|----------|--|--|
| 8062204 | ---          | ---       | ---                                                                             | 0.017  | 1.012 | 9.60E-01 | 9.60E+01 |  |  |
| 8062206 | NM_080748    | ROMO1     | reactive oxygen species modulator                                               | 0.116  | 1.084 | 2.47E-01 | 2.47E+01 |  |  |
| 8062211 | NM_032194    | BXDC1     | brx domain containing 1                                                         | 0.167  | 1.123 | 2.27E-01 | 2.27E+01 |  |  |
| 8062213 | NM_016436    | PHF20     | PHD finger protein 20                                                           | -0.126 | 0.916 | 1.58E-01 | 1.58E+01 |  |  |
| 8062251 | NM_012156    | EPB41L1   | erythrocyte membrane protein band 4.1                                           | -0.099 | 0.934 | 8.90E-02 | 8.90E+00 |  |  |
| 8062286 | BC019311     | C20orf4   | chromosome 20 open reading frame 4                                              | -0.026 | 0.982 | 8.73E-01 | 8.73E+01 |  |  |
| 8062293 | NM_014902    | DLGAP4    | discs, large (Drosophila) homolog 4                                             | -0.042 | 0.972 | 6.34E-01 | 6.34E+01 |  |  |
| 8062312 | NM_006097    | MYL9      | myosin, light chain 9, regulatory                                               | -0.013 | 0.991 | 9.50E-01 | 9.50E+01 |  |  |
| 8062319 | NM_021809    | TGIF2     | TGFB-induced factor homeobox 2                                                  | -0.030 | 0.979 | 8.30E-01 | 8.30E+01 |  |  |
| 8062326 | NR_026562    | C20orf24  | chromosome 20 open reading frame 24                                             | 0.009  | 1.006 | 9.76E-01 | 9.76E+01 |  |  |
| 8062337 | ---          | ---       | ---                                                                             | -0.007 | 0.996 | 9.66E-01 | 9.66E+01 |  |  |
| 8062339 | BC130646     | C20orf118 | chromosome 20 open reading frame 118                                            | 0.147  | 1.107 | 6.73E-02 | 6.73E+00 |  |  |
| 8062347 | NM_002895    | RBL1      | retinoblastoma-like 1 (p107)                                                    | 0.010  | 1.007 | 9.64E-01 | 9.64E+01 |  |  |
| 8062349 | NM_002951    | RPN2      | ribophorin II                                                                   | 0.131  | 1.095 | 1.65E-01 | 1.65E+01 |  |  |
| 8062371 | NM_022077    | MANBAL    | mannosidase, beta A, lysosomal-like                                             | -0.031 | 0.979 | 8.58E-01 | 8.58E+01 |  |  |
| 8062377 | NM_005417    | SRC       | v-src sarcoma (Schmidt-Ruppin A-2) src                                          | 0.010  | 1.007 | 9.60E-01 | 9.60E+01 |  |  |
| 8062395 | NM_005386    | NNAT      | neuronatin                                                                      | 0.028  | 1.020 | 8.74E-01 | 8.74E+01 |  |  |
| 8062404 | ---          | ---       | ---                                                                             | -0.031 | 0.979 | 8.74E-01 | 8.74E+01 |  |  |
| 8062409 | NM_030877    | CTNBL1    | catenin, beta like 1                                                            | -0.008 | 0.994 | 9.77E-01 | 9.77E+01 |  |  |
| 8062427 | NM_080607    | VSTM2L    | V-set and transmembrane domain containing 2L                                    | -0.034 | 0.977 | 7.98E-01 | 7.98E+01 |  |  |
| 8062433 | NM_021215    | RPRD1B    | regulation of nuclear pre-mRNA dephosphorylation 1B                             | 0.002  | 1.002 | 9.90E-01 | 9.90E+01 |  |  |
| 8062480 | NR_003239    | SNHG11    | small nucleolar RNA host gene 11                                                | -0.019 | 0.987 | 8.63E-01 | 8.63E+01 |  |  |
| 8062490 | NR_002986    | SNORA60   | small nucleolar RNA, H/ACA box 60                                               | -0.021 | 0.986 | 9.16E-01 | 9.16E+01 |  |  |
| 8062492 | NM_020336    | KIAA1219  | KIAA1219                                                                        | -0.061 | 0.958 | 4.23E-01 | 4.23E+01 |  |  |
| 8062527 | NM_00101808  | ADIG      | adipogenin                                                                      | -0.026 | 0.982 | 8.78E-01 | 8.78E+01 |  |  |
| 8062545 | NM_024855    | ACTR5     | ARPS actin-related protein 5 homolog                                            | -0.086 | 0.942 | 5.32E-01 | 5.32E+01 |  |  |
| 8062555 | ---          | ---       | ---                                                                             | 0.064  | 1.045 | 7.73E-01 | 7.73E+01 |  |  |
| 8062557 | NM_015568    | PPP1R16B  | protein phosphatase 1, regulatory subunit 16B                                   | -0.131 | 0.913 | 2.12E-01 | 2.12E+01 |  |  |
| 8062569 | ---          | ---       | ---                                                                             | -0.039 | 0.973 | 8.48E-01 | 8.48E+01 |  |  |
| 8062576 | NM_021931    | DHX35     | DEAH (Asp-Glu-Ala-His) box polypeptide 35                                       | 0.070  | 1.050 | 7.16E-01 | 7.16E+01 |  |  |
| 8062603 | NM_003286    | TOP1      | topoisomerase (DNA) I                                                           | 0.043  | 1.030 | 6.42E-01 | 6.42E+01 |  |  |
| 8062623 | NM_002660    | PLCG1     | phospholipase C, gamma 1                                                        | -0.005 | 0.997 | 9.85E-01 | 9.85E+01 |  |  |
| 8062658 | NM_022896    | LPIN3     | lipin 3                                                                         | -0.055 | 0.963 | 5.41E-01 | 5.41E+01 |  |  |
| 8062681 | ---          | ---       | ---                                                                             | -0.064 | 0.957 | 8.07E-01 | 8.07E+01 |  |  |
| 8062687 | ---          | ---       | ---                                                                             | 0.095  | 1.068 | 5.15E-01 | 5.15E+01 |  |  |
| 8062695 | NM_006275    | SFRS6     | splicing factor, arginine/serine-rich 6                                         | -0.018 | 0.988 | 9.16E-01 | 9.16E+01 |  |  |
| 8062705 | NM_032107    | L3MBTL    | l(3)mbt-like (Drosophila)                                                       | 0.038  | 1.027 | 7.51E-01 | 7.51E+01 |  |  |
| 8062766 | NM_002466    | MYBL2     | v-myb myeloblastosis viral oncogene homolog B2                                  | -0.027 | 0.981 | 8.52E-01 | 8.52E+01 |  |  |
| 8062782 | NM_032883    | TOX2      | TOX high mobility group box family 2                                            | -0.082 | 0.944 | 3.04E-01 | 3.04E+01 |  |  |
| 8062794 | ---          | ---       | ---                                                                             | 0.058  | 1.041 | 7.53E-01 | 7.53E+01 |  |  |
| 8062796 | NM_024034    | GDAP1L1   | ganglioside-induced differentiation associated protein 1L1                      | -0.042 | 0.971 | 7.54E-01 | 7.54E+01 |  |  |
| 8062813 | NM_178491    | R3HDM1    | R3H domain containing-like 1                                                    | -0.049 | 0.967 | 6.20E-01 | 6.20E+01 |  |  |
| 8062823 | NM_000457    | HNF4A     | hepatocyte nuclear factor 4, alpha                                              | 0.005  | 1.003 | 9.72E-01 | 9.72E+01 |  |  |
| 8062842 | ---          | ---       | ---                                                                             | -0.050 | 0.966 | 7.98E-01 | 7.98E+01 |  |  |
| 8062844 | NM_024331    | TTPAL     | tocopherol (alpha) transfer protein                                             | -0.104 | 0.930 | 4.13E-01 | 4.13E+01 |  |  |
| 8062852 | NM_181805    | PKIG      | protein kinase (cAMP-dependent, cGMP-dependent, and calmodulin-regulated) gamma | 0.003  | 1.002 | 9.90E-01 | 9.90E+01 |  |  |
| 8062864 | NM_003881    | WISP2     | WNT1 inducible signaling pathway protein 2                                      | -0.081 | 0.946 | 2.28E-01 | 2.28E+01 |  |  |
| 8062873 | NM_022358    | KCNK15    | potassium channel, subfamily K, member 15                                       | 0.006  | 1.004 | 9.77E-01 | 9.77E+01 |  |  |
| 8062880 | NM_003404    | YWHAB     | tyrosine 3-monooxygenase/tryptophan 5-hydroxylase                               | 0.063  | 1.045 | 4.26E-01 | 4.26E+01 |  |  |
| 8062890 | NM_00112475  | PABPC1L   | poly(A) binding protein, cytoplasmic 1L                                         | -0.065 | 0.956 | 4.32E-01 | 4.32E+01 |  |  |
| 8062908 | NM_006282    | STK4      | serine/threonine kinase 4                                                       | -0.072 | 0.951 | 1.79E-01 | 1.79E+01 |  |  |
| 8062948 | NM_014276    | RBPJL     | recombination signal binding protein J-like                                     | -0.053 | 0.964 | 6.34E-01 | 6.34E+01 |  |  |
| 8062962 | ---          | ---       | ---                                                                             | -0.015 | 0.990 | 9.53E-01 | 9.53E+01 |  |  |
| 8062964 | NM_033542    | SYS1      | SYS1 Golgi-localized integral membrane protein                                  | 0.049  | 1.034 | 7.45E-01 | 7.45E+01 |  |  |
| 8062971 | NM_00104822  | DBNDD2    | dysbindin (dystrobrevin binding protein)                                        | -0.018 | 0.988 | 9.07E-01 | 9.07E+01 |  |  |
| 8062981 | NM_015937    | PIGT      | phosphatidylinositol glycan anchor                                              | -0.026 | 0.982 | 8.72E-01 | 8.72E+01 |  |  |
| 8063000 | NM_006103    | WFDC2     | WAP four-disulfide core domain 2                                                | 0.025  | 1.018 | 8.14E-01 | 8.14E+01 |  |  |
| 8063011 | NM_080753    | WFDC10A   | WAP four-disulfide core domain 10A                                              | 0.026  | 1.018 | 8.72E-01 | 8.72E+01 |  |  |
| 8063014 | NM_172005    | WFDC13    | WAP four-disulfide core domain 13                                               | -0.007 | 0.995 | 9.68E-01 | 9.68E+01 |  |  |
| 8063028 | NM_052951    | DNTTIP1   | deoxynucleotidyltransferase, terminal                                           | -0.016 | 0.989 | 9.12E-01 | 9.12E+01 |  |  |
| 8063043 | NM_181802    | UBE2C     | ubiquitin-conjugating enzyme E2C                                                | 0.107  | 1.077 | 1.95E-01 | 1.95E+01 |  |  |
| 8063057 | NM_033421    | SNX21     | sorting nexin family member 21                                                  | -0.052 | 0.964 | 4.96E-01 | 4.96E+01 |  |  |
| 8063071 | NM_080752    | ZSWIM3    | zinc finger, SWIM-type containing                                               | -0.073 | 0.951 | 5.02E-01 | 5.02E+01 |  |  |
| 8063074 | NM_080603    | ZSWIM1    | zinc finger, SWIM-type containing                                               | 0.022  | 1.015 | 8.91E-01 | 8.91E+01 |  |  |
| 8063078 | NM_00112769  | CTSA      | cathepsin A                                                                     | 0.244  | 1.185 | 1.68E-01 | 1.68E+01 |  |  |
| 8063097 | NM_022104    | PCIF1     | PDX1 C-terminal inhibiting factor 1                                             | -0.104 | 0.930 | 1.61E-01 | 1.61E+01 |  |  |
| 8063115 | NM_004994    | MMP9      | matrix metalloproteinase 9 (gelatinase)                                         | 0.317  | 1.246 | 6.24E-01 | 6.24E+01 |  |  |
| 8063174 | ENST00000442 | ZNF840P   | zinc finger protein 840 (pseudogene)                                            | -0.147 | 0.903 | 6.17E-01 | 6.17E+01 |  |  |
| 8063177 | NM_030777    | SLC2A10   | solute carrier family 2 (facilitated glucose transporter)                       | 0.006  | 1.004 | 9.73E-01 | 9.73E+01 |  |  |
| 8063187 | NM_172111    | EYA2      | eyes absent homolog 2 (Drosophila)                                              | -0.068 | 0.954 | 5.15E-01 | 5.15E+01 |  |  |
| 8063211 | NM_181659    | NCOA3     | nuclear receptor coactivator 3                                                  | 0.021  | 1.015 | 8.94E-01 | 8.94E+01 |  |  |
| 8063240 | ---          | ---       | ---                                                                             | 0.068  | 1.048 | 6.92E-01 | 6.92E+01 |  |  |
| 8063242 | NM_006420    | ARFGEF2   | ADP-ribosylation factor guanine nucleotide exchange factor 2                    | 0.035  | 1.025 | 7.89E-01 | 7.89E+01 |  |  |
| 8063283 | NM_001316    | CSE1L     | CSE1 chromosome segregation 1-like                                              | -0.034 | 0.977 | 8.49E-01 | 8.49E+01 |  |  |
| 8063315 | NM_017895    | DDX27     | DEAD (Asp-Glu-Ala-Asp) box polypeptide 27                                       | -0.077 | 0.948 | 6.34E-01 | 6.34E+01 |  |  |
| 8063337 | NR_003605    | C20orf199 | chromosome 20 open reading frame 199                                            | -0.020 | 0.986 | 8.91E-01 | 8.91E+01 |  |  |
| 8063345 | NR_002433    | SNORD12C  | small nucleolar RNA, C/D box 12C                                                | -0.301 | 0.812 | 4.91E-01 | 4.91E+01 |  |  |

|         |              |            |                                      |        |       |          |          |  |  |
|---------|--------------|------------|--------------------------------------|--------|-------|----------|----------|--|--|
| 8063347 | ---          | ---        | ---                                  | -0.005 | 0.997 | 9.84E-01 | 9.84E+01 |  |  |
| 8063351 | NM_015266    | SLC9A8     | solute carrier family 9 (sodium/hy   | 0.074  | 1.052 | 5.77E-01 | 5.77E+01 |  |  |
| 8063369 | NM_018683    | RNF114     | ring finger protein 114              | 0.181  | 1.133 | 3.26E-02 | 3.26E+00 |  |  |
| 8063386 | NM_005194    | CEBPB      | CCAAT/enhancer binding protein       | 0.015  | 1.011 | 9.49E-01 | 9.49E+01 |  |  |
| 8063389 | AK090605     | LOC284751  | hypothetical LOC284751               | -0.002 | 0.998 | 9.90E-01 | 9.90E+01 |  |  |
| 8063394 | NM_002827    | PTPN1      | protein tyrosine phosphatase, non    | -0.083 | 0.944 | 5.12E-01 | 5.12E+01 |  |  |
| 8063408 | ---          | ---        | ---                                  | -0.112 | 0.925 | 7.04E-01 | 7.04E+01 |  |  |
| 8063410 | NM_032521    | PARD6B     | par-6 partitioning defective 6 hom   | -0.081 | 0.946 | 5.52E-01 | 5.52E+01 |  |  |
| 8063417 | NM_017843    | BCAS4      | breast carcinoma amplified sequ      | -0.055 | 0.963 | 5.98E-01 | 5.98E+01 |  |  |
| 8063427 | NM_014484    | MOCS3      | molybdenum cofactor synthesis 3      | -0.129 | 0.915 | 3.41E-01 | 3.41E+01 |  |  |
| 8063437 | NM_173485    | TSHZ2      | teashirt zinc finger homeobox 2      | -0.031 | 0.979 | 9.57E-01 | 9.57E+01 |  |  |
| 8063444 | ENST00000371 | TSHZ2      | teashirt zinc finger homeobox 2      | -0.042 | 0.971 | 9.57E-01 | 9.57E+01 |  |  |
| 8063449 | ---          | ---        | ---                                  | 0.055  | 1.039 | 7.18E-01 | 7.18E+01 |  |  |
| 8063453 | NM_002623    | PFDN4      | prefoldin subunit 4                  | 0.004  | 1.002 | 9.91E-01 | 9.91E+01 |  |  |
| 8063473 | NM_000976    | RPL12      | ribosomal protein L12                | 0.021  | 1.015 | 9.22E-01 | 9.22E+01 |  |  |
| 8063476 | NM_019888    | MC3R       | melanocortin 3 receptor              | 0.091  | 1.065 | 4.16E-01 | 4.16E+01 |  |  |
| 8063478 | NM_080821    | C20orf108  | chromosome 20 open reading fram      | -0.002 | 0.999 | 9.90E-01 | 9.90E+01 |  |  |
| 8063484 | NM_00103352  | CSTF1      | cleavage stimulation factor, 3' pre  | -0.049 | 0.967 | 6.98E-01 | 6.98E+01 |  |  |
| 8063497 | NM_020356    | CASS4      | Cas scaffolding protein family me    | 0.163  | 1.120 | 1.53E-01 | 1.53E+01 |  |  |
| 8063509 | NM_016407    | C20orf43   | chromosome 20 open reading fram      | 0.101  | 1.073 | 1.57E-01 | 1.57E+01 |  |  |
| 8063522 | ---          | ---        | ---                                  | -0.106 | 0.929 | 8.18E-01 | 8.18E+01 |  |  |
| 8063526 | NM_00101297  | C20orf106  | chromosome 20 open reading fram      | 0.051  | 1.036 | 7.63E-01 | 7.63E+01 |  |  |
| 8063531 | BC105792     | C20orf107  | chromosome 20 open reading fram      | 0.027  | 1.019 | 9.36E-01 | 9.36E+01 |  |  |
| 8063547 | ---          | ---        | ---                                  | -0.059 | 0.960 | 7.27E-01 | 7.27E+01 |  |  |
| 8063549 | ---          | ---        | ---                                  | -0.061 | 0.959 | 6.44E-01 | 6.44E+01 |  |  |
| 8063566 | NM_003610    | RAE1       | RAE1 RNA export 1 homolog (S. po     | 0.076  | 1.054 | 6.78E-01 | 6.78E+01 |  |  |
| 8063583 | NM_017495    | RBM38      | RNA binding motif protein 38         | -0.120 | 0.920 | 1.58E-01 | 1.58E+01 |  |  |
| 8063607 | NM_020673    | RAB22A     | RAB22A, member RAS oncogene fa       | -0.022 | 0.985 | 8.82E-01 | 8.82E+01 |  |  |
| 8063620 | NM_004738    | VAPB       | VAMP (vesicle-associated membra      | -0.072 | 0.952 | 4.84E-01 | 4.84E+01 |  |  |
| 8063634 | ENST00000419 | MGC4294    | hypothetical protein MGC4294         | 0.011  | 1.007 | 9.56E-01 | 9.56E+01 |  |  |
| 8063636 | NM_00100143  | STX16      | syntaxin 16                          | -0.006 | 0.996 | 9.77E-01 | 9.77E+01 |  |  |
| 8063650 | NM_024663    | NPEPL1     | aminopeptidase-like 1                | -0.065 | 0.956 | 5.88E-01 | 5.88E+01 |  |  |
| 8063668 | NM_000516    | GNAS       | GNAS complex locus                   | 0.027  | 1.019 | 7.51E-01 | 7.51E+01 |  |  |
| 8063697 | NM_198976    | TH1L       | TH1-like (Drosophila)                | 0.113  | 1.081 | 7.31E-02 | 7.31E+00 |  |  |
| 8063716 | NM_030773    | TUBB1      | tubulin, beta 1                      | -0.001 | 0.999 | 9.98E-01 | 9.98E+01 |  |  |
| 8063723 | NM_178457    | ZNF831     | zinc finger protein 831              | 0.053  | 1.037 | 7.56E-01 | 7.56E+01 |  |  |
| 8063729 | NM_207032    | EDN3       | endothelin 3                         | -0.004 | 0.997 | 9.81E-01 | 9.81E+01 |  |  |
| 8063739 | NM_080672    | PHACTR3    | phosphatase and actin regulator 3    | -0.039 | 0.973 | 6.42E-01 | 6.42E+01 |  |  |
| 8063755 | BC054002     | C20orf177  | chromosome 20 open reading fram      | 0.025  | 1.017 | 9.22E-01 | 9.22E+01 |  |  |
| 8063761 | NM_177980    | CDH26      | cadherin-like 26                     | 0.044  | 1.031 | 7.16E-01 | 7.16E+01 |  |  |
| 8063785 | AY358539     | C20orf197  | chromosome 20 open reading fram      | 0.006  | 1.004 | 9.81E-01 | 9.81E+01 |  |  |
| 8063796 | NM_001794    | CDH4       | cadherin 4, type 1, R-cadherin (ret  | -0.084 | 0.944 | 2.95E-01 | 2.95E+01 |  |  |
| 8063814 | NM_144703    | LSM14B     | LSM14B, SCD6 homolog B (S. cere      | 0.020  | 1.014 | 8.79E-01 | 8.79E+01 |  |  |
| 8063835 | NM_144703    | LSM14B     | LSM14B, SCD6 homolog B (S. cere      | 0.007  | 1.005 | 9.85E-01 | 9.85E+01 |  |  |
| 8063839 | NM_198935    | SS18L1     | synovial sarcoma translocation ge    | -0.048 | 0.968 | 5.47E-01 | 5.47E+01 |  |  |
| 8063857 | NM_015666    | GTPBP5     | GTP binding protein 5 (putative)     | 0.022  | 1.015 | 8.88E-01 | 8.88E+01 |  |  |
| 8063869 | AK126744     | FLJ44790   | hypothetical FLJ44790                | -0.038 | 0.974 | 7.92E-01 | 7.92E+01 |  |  |
| 8063873 | NM_144498    | OSBPL2     | oxysterol binding protein-like 2     | 0.010  | 1.007 | 9.65E-01 | 9.65E+01 |  |  |
| 8063893 | NM_007002    | ADRM1      | adhesion regulating molecule 1       | -0.033 | 0.977 | 8.59E-01 | 8.59E+01 |  |  |
| 8063903 | NM_001024    | RPS21      | ribosomal protein S21                | 0.041  | 1.029 | 7.63E-01 | 7.63E+01 |  |  |
| 8063914 | NM_178463    | C20orf166  | chromosome 20 open reading fram      | -0.027 | 0.981 | 8.70E-01 | 8.70E+01 |  |  |
| 8063923 | NM_016354    | SLCO4A1    | solute carrier organic anion transp  | -0.153 | 0.899 | 2.73E-01 | 2.73E+01 |  |  |
| 8063949 | NM_018270    | C20orf20   | chromosome 20 open reading fram      | 0.053  | 1.037 | 7.60E-01 | 7.60E+01 |  |  |
| 8063955 | NM_007346    | OGFR       | opioid growth factor receptor        | -0.009 | 0.994 | 9.65E-01 | 9.65E+01 |  |  |
| 8063970 | NM_001853    | COL9A3     | collagen, type IX, alpha 3           | -0.083 | 0.944 | 1.69E-01 | 1.69E+01 |  |  |
| 8064003 | BC046933     | TCFL5      | transcription factor-like 5 (basic h | -0.042 | 0.971 | 8.66E-01 | 8.66E+01 |  |  |
| 8064007 | NM_017896    | C20orf113  | chromosome 20 open reading fram      | 0.038  | 1.027 | 8.47E-01 | 8.47E+01 |  |  |
| 8064014 | NM_022082    | SLC17A9    | solute carrier family 17, member 9   | -0.054 | 0.963 | 5.40E-01 | 5.40E+01 |  |  |
| 8064031 | NM_139317    | BIRC7      | baculoviral IAP repeat-containing    | 0.020  | 1.014 | 8.48E-01 | 8.48E+01 |  |  |
| 8064042 | NM_175609    | ARFGAP1    | ADP-ribosylation factor GTPase ac    | -0.022 | 0.985 | 8.70E-01 | 8.70E+01 |  |  |
| 8064059 | NM_020882    | COL20A1    | collagen, type XX, alpha 1           | -0.028 | 0.981 | 7.96E-01 | 7.96E+01 |  |  |
| 8064100 | NM_024299    | PPDPF      | pancreatic progenitor cell differen  | 0.028  | 1.020 | 8.58E-01 | 8.58E+01 |  |  |
| 8064108 | BC000912     | C20orf195  | chromosome 20 open reading fram      | -0.051 | 0.965 | 5.15E-01 | 5.15E+01 |  |  |
| 8064111 | NM_032957    | RTEL1      | regulator of telomere elongation h   | -0.015 | 0.990 | 8.75E-01 | 8.75E+01 |  |  |
| 8064156 | NM_032527    | ZGPAT      | zinc finger, CCCH-type with G patc   | -0.036 | 0.975 | 7.16E-01 | 7.16E+01 |  |  |
| 8064168 | NM_017806    | LIME1      | Lck interacting transmembrane ad     | -0.020 | 0.986 | 8.92E-01 | 8.92E+01 |  |  |
| 8064175 | NM_020062    | SLC2A4RG   | SLC2A4 regulator                     | -0.029 | 0.980 | 8.09E-01 | 8.09E+01 |  |  |
| 8064188 | ---          | ---        | ---                                  | -0.061 | 0.959 | 5.89E-01 | 5.89E+01 |  |  |
| 8064191 | NM_199360    | TPD52L2    | tumor protein D52-like 2             | 0.061  | 1.043 | 8.15E-01 | 8.15E+01 |  |  |
| 8064203 | NM_080622    | C20orf135  | chromosome 20 open reading fram      | -0.025 | 0.983 | 8.77E-01 | 8.77E+01 |  |  |
| 8064208 | NM_025219    | DNAJC5     | DnaJ (Hsp40) homolog, subfamily      | 0.068  | 1.048 | 6.32E-01 | 6.32E+01 |  |  |
| 8064218 | NM_012469    | PRPF6      | PRP6 pre-mRNA processing factor      | -0.021 | 0.986 | 9.01E-01 | 9.01E+01 |  |  |
| 8064242 | NR_027686    | NCRNA00176 | non-protein coding RNA 176           | -0.067 | 0.955 | 5.91E-01 | 5.91E+01 |  |  |
| 8064245 | NM_198723    | TCEA2      | transcription elongation factor A (  | 0.039  | 1.027 | 8.03E-01 | 8.03E+01 |  |  |
| 8064261 | NM_182647    | OPRL1      | opiate receptor-like 1               | -0.026 | 0.982 | 8.53E-01 | 8.53E+01 |  |  |
| 8064277 | NM_004535    | MYT1       | myellin-L transcription factor 1     | 0.000  | 1.000 | 1.00E+00 | 1.00E+02 |  |  |
| 8064302 | NM_018257    | PCMTD2     | protein-L-isoaspartate (D-aspartat   | 0.020  | 1.014 | 9.57E-01 | 9.57E+01 |  |  |



|         |               |              |                                         |        |       |          |          |  |  |
|---------|---------------|--------------|-----------------------------------------|--------|-------|----------|----------|--|--|
| 8064322 | BC134417      | C20orf96     | chromosome 20 open reading fram         | -0.074 | 0.950 | 7.34E-01 | 7.34E+01 |  |  |
| 8064336 | NM_144628     | TBC1D20      | TBC1 domain family, member 20           | -0.041 | 0.972 | 7.40E-01 | 7.40E+01 |  |  |
| 8064351 | NM_177559     | CSNK2A1      | casein kinase 2, alpha 1 polypeptid     | -0.001 | 1.000 | 9.97E-01 | 9.97E+01 |  |  |
| 8064370 | NM_004609     | TCF15        | transcription factor 15 (basic helix    | -0.028 | 0.981 | 8.09E-01 | 8.09E+01 |  |  |
| 8064382 | AK125343      | SRXN1        | sulfiredoxin 1 homolog (S. cerevisi     | -0.003 | 0.998 | 9.89E-01 | 9.89E+01 |  |  |
| 8064384 | NM_033129     | SCRT2        | scratch homolog 2, zinc finger pro      | 0.020  | 1.014 | 9.02E-01 | 9.02E+01 |  |  |
| 8064388 | NM_033409     | C20orf54     | chromosome 20 open reading fram         | 0.039  | 1.027 | 6.91E-01 | 6.91E+01 |  |  |
| 8064394 | ENST00000217  | RPS10P5      | ribosomal protein S10 pseudogen         | -0.058 | 0.960 | 5.47E-01 | 5.47E+01 |  |  |
| 8064396 | NM_015985     | ANGPT4       | angiotensinogen 4                       | 0.012  | 1.008 | 9.54E-01 | 9.54E+01 |  |  |
| 8064407 | NM_00102987   | RSPO4        | R-spondin family, member 4              | -0.020 | 0.986 | 8.85E-01 | 8.85E+01 |  |  |
| 8064415 | ENST000000381 | C20orf46     | chromosome 20 open reading fram         | 0.042  | 1.030 | 8.73E-01 | 8.73E+01 |  |  |
| 8064418 | NM_080489     | SDCBP2       | syndecan binding protein (synteni       | -0.066 | 0.955 | 5.01E-01 | 5.01E+01 |  |  |
| 8064430 | ---           | ---          | ---                                     | 0.011  | 1.008 | 9.57E-01 | 9.57E+01 |  |  |
| 8064432 | NM_000801     | FKBP1A       | FK506 binding protein 1A, 12kDa         | 0.038  | 1.027 | 8.71E-01 | 8.71E+01 |  |  |
| 8064438 | NM_016143     | NSFL1C       | NSFL1 (p97) cofactor (p47)              | 0.026  | 1.018 | 9.08E-01 | 9.08E+01 |  |  |
| 8064451 | NM_00112296   | SIRPB2       | signal-regulatory protein beta 2        | -0.020 | 0.987 | 9.57E-01 | 9.57E+01 |  |  |
| 8064485 | NM_018556     | SIRPG        | signal-regulatory protein gamma         | 0.130  | 1.094 | 1.53E-01 | 1.53E+01 |  |  |
| 8064502 | NM_003091     | SNRNP        | small nuclear ribonucleoprotein p       | -0.030 | 0.980 | 8.92E-01 | 8.92E+01 |  |  |
| 8064522 | NM_174856     | IDH3B        | isocitrate dehydrogenase 3 (NAD+        | -0.068 | 0.954 | 6.06E-01 | 6.06E+01 |  |  |
| 8064557 | AK293638      | FAM113A      | family with sequence similarity 11      | 0.038  | 1.027 | 7.32E-01 | 7.32E+01 |  |  |
| 8064575 | NM_000490     | AVP          | arginine vasopressin                    | -0.018 | 0.988 | 9.11E-01 | 9.11E+01 |  |  |
| 8064581 | NM_021826     | FASTKD5      | FAST kinase domains 5                   | -0.032 | 0.978 | 8.48E-01 | 8.48E+01 |  |  |
| 8064591 | NM_014731     | ProSAPIP1    | ProSAPIP1 protein                       | -0.013 | 0.991 | 9.33E-01 | 9.33E+01 |  |  |
| 8064601 | NM_023935     | DDRKG1       | DDRKG domain containing 1               | -0.140 | 0.907 | 1.87E-01 | 1.87E+01 |  |  |
| 8064613 | NM_032034     | SLC4A11      | solute carrier family 4, sodium bor     | -0.045 | 0.969 | 6.02E-01 | 6.02E+01 |  |  |
| 8064637 | NM_00100998   | C20orf194    | chromosome 20 open reading fram         | 0.047  | 1.033 | 8.27E-01 | 8.27E+01 |  |  |
| 8064676 | NM_145762     | GFR4A        | GDNF family receptor alpha 4            | -0.030 | 0.980 | 7.92E-01 | 7.92E+01 |  |  |
| 8064686 | NM_025220     | ADAM33       | ADAM metalloproteinase domain 3         | -0.027 | 0.981 | 8.32E-01 | 8.32E+01 |  |  |
| 8064716 | NM_023068     | SIGLEC1      | sialic acid binding Ig-like lectin 1, s | 0.107  | 1.077 | 2.29E-01 | 2.29E+01 |  |  |
| 8064739 | NM_00103914   | C20orf27     | chromosome 20 open reading fram         | -0.015 | 0.990 | 9.16E-01 | 9.16E+01 |  |  |
| 8064751 | NM_015417     | SPEF1        | sperm flagellar 1                       | -0.067 | 0.954 | 5.41E-01 | 5.41E+01 |  |  |
| 8064762 | NM_001810     | CENPB        | centromere protein B, 80kDa             | -0.063 | 0.958 | 4.84E-01 | 4.84E+01 |  |  |
| 8064766 | NM_00113433   | RNF24        | ring finger protein 24                  | -0.044 | 0.970 | 7.57E-01 | 7.57E+01 |  |  |
| 8064779 | NM_000678     | ADRA1D       | adrenergic, alpha-1D-, receptor         | -0.032 | 0.978 | 7.45E-01 | 7.45E+01 |  |  |
| 8064790 | NM_014737     | RASSF2       | Ras association (RalGDS/AF-6) dom       | -0.020 | 0.986 | 9.69E-01 | 9.69E+01 |  |  |
| 8064831 | ---           | ---          | ---                                     | -0.080 | 0.946 | 6.37E-01 | 6.37E+01 |  |  |
| 8064833 | NM_00100992   | C20orf30     | chromosome 20 open reading fram         | -0.039 | 0.974 | 7.84E-01 | 7.84E+01 |  |  |
| 8064842 | ---           | ---          | ---                                     | 0.004  | 1.003 | 9.85E-01 | 9.85E+01 |  |  |
| 8064844 | NM_002592     | PCNA         | proliferating cell nuclear antigen      | 0.036  | 1.026 | 9.08E-01 | 9.08E+01 |  |  |
| 8064857 | ---           | ---          | ---                                     | -0.053 | 0.964 | 8.06E-01 | 8.06E+01 |  |  |
| 8064866 | NR_015406     | RP5-1022P6.6 | hypothetical LOC149837                  | -0.086 | 0.942 | 7.52E-01 | 7.52E+01 |  |  |
| 8064868 | NM_019593     | RP5-1022P6.2 | hypothetical protein KIAA1434           | 0.221  | 1.166 | 5.64E-02 | 5.64E+00 |  |  |
| 8064879 | NM_015939     | TRMT6        | tRNA methyltransferase 6 homolo         | 0.023  | 1.016 | 9.28E-01 | 9.28E+01 |  |  |
| 8064894 | NM_152611     | LRRN4        | leucine rich repeat neuronal 4          | -0.064 | 0.956 | 4.96E-01 | 4.96E+01 |  |  |
| 8064939 | NM_021156     | TMX4         | thioredoxin-related transmembran        | 0.137  | 1.100 | 4.14E-01 | 4.14E+01 |  |  |
| 8064976 | NM_015190     | DNAJC9       | Dnaj (Hsp40) homolog, subfamily         | -0.078 | 0.948 | 5.63E-01 | 5.63E+01 |  |  |
| 8064978 | NM_000214     | JAG1         | jagged 1 (Alagille syndrome)            | -0.014 | 0.990 | 9.44E-01 | 9.44E+01 |  |  |
| 8065013 | ---           | ---          | ---                                     | -0.094 | 0.937 | 5.09E-01 | 5.09E+01 |  |  |
| 8065016 | ---           | ---          | ---                                     | 0.012  | 1.008 | 9.49E-01 | 9.49E+01 |  |  |
| 8065018 | NM_017714     | TASP1        | taspase, threonine aspartase, 1         | -0.008 | 0.994 | 9.70E-01 | 9.70E+01 |  |  |
| 8065032 | NM_016649     | ESF1         | ESF1, nucleolar pre-rRNA processi       | 0.047  | 1.033 | 7.41E-01 | 7.41E+01 |  |  |
| 8065084 | AK125594      | LOC613266    | hypothetical LOC613266                  | 0.043  | 1.030 | 7.99E-01 | 7.99E+01 |  |  |
| 8065089 | NM_024704     | KIF16B       | kinesin family member 16B               | 0.031  | 1.022 | 9.18E-01 | 9.18E+01 |  |  |
| 8065122 | ---           | ---          | ---                                     | -0.080 | 0.946 | 5.56E-01 | 5.56E+01 |  |  |
| 8065136 | NM_00104257   | RRBP1        | ribosome binding protein 1 homol        | 0.069  | 1.049 | 6.75E-01 | 6.75E+01 |  |  |
| 8065165 | NM_152227     | SNX5         | sorting nexin 5                         | 0.175  | 1.129 | 4.65E-03 | 4.65E-01 |  |  |
| 8065185 | NM_021220     | OVOL2        | ovo-like 2 (Drosophila)                 | -0.063 | 0.957 | 3.67E-01 | 3.67E+01 |  |  |
| 8065194 | ---           | ---          | ---                                     | -0.020 | 0.986 | 9.61E-01 | 9.61E+01 |  |  |
| 8065196 | ---           | ---          | ---                                     | -0.083 | 0.944 | 5.93E-01 | 5.93E+01 |  |  |
| 8065202 | NM_00109940   | C20orf12     | chromosome 20 open reading fram         | -0.115 | 0.923 | 3.31E-01 | 3.31E+01 |  |  |
| 8065242 | AF161557      | HSPC072      | hypothetical LOC29075                   | -0.170 | 0.889 | 5.38E-01 | 5.38E+01 |  |  |
| 8065252 | ---           | ---          | ---                                     | -0.050 | 0.966 | 7.47E-01 | 7.47E+01 |  |  |
| 8065254 | ---           | ---          | ---                                     | 0.052  | 1.037 | 8.52E-01 | 8.52E+01 |  |  |
| 8065256 | NM_016652     | CRNKL1       | crooked neck pre-mRNA splicing fa       | -0.011 | 0.992 | 9.50E-01 | 9.50E+01 |  |  |
| 8065280 | NM_020343     | C20orf74     | chromosome 20 open reading fram         | 0.016  | 1.011 | 9.44E-01 | 9.44E+01 |  |  |
| 8065325 | ---           | ---          | ---                                     | 0.047  | 1.033 | 8.21E-01 | 8.21E+01 |  |  |
| 8065327 | NM_033176     | NKX2-4       | NK2 homeobox 4                          | -0.010 | 0.993 | 9.53E-01 | 9.53E+01 |  |  |
| 8065330 | ---           | ---          | ---                                     | -0.089 | 0.940 | 4.04E-01 | 4.04E+01 |  |  |
| 8065344 | NM_021784     | FOXA2        | forkhead box A2                         | -0.028 | 0.981 | 8.44E-01 | 8.44E+01 |  |  |
| 8065363 | AF258576      | LOC200261    | hypothetical LOC200261                  | -0.105 | 0.929 | 2.02E-01 | 2.02E+01 |  |  |
| 8065370 | ---           | ---          | ---                                     | 0.041  | 1.029 | 8.47E-01 | 8.47E+01 |  |  |
| 8065372 | NM_022080     | NAPB         | N-ethylmaleimide-sensitive factor       | -0.003 | 0.998 | 9.87E-01 | 9.87E+01 |  |  |
| 8065403 | NM_000099     | CST3         | cystatin C                              | 0.187  | 1.138 | 9.87E-02 | 9.87E+00 |  |  |
| 8065410 | NM_001899     | CST4         | cystatin S                              | -0.011 | 0.992 | 9.62E-01 | 9.62E+01 |  |  |
| 8065416 | NM_001322     | CST2         | cystatin SA                             | -0.064 | 0.957 | 5.67E-01 | 5.67E+01 |  |  |
| 8065421 | NM_001900     | CST5         | cystatin D                              | -0.049 | 0.967 | 6.08E-01 | 6.08E+01 |  |  |
| 8065427 | NM_178311     | GGTLC1       | gamma-glutamyltransferase light         | -0.001 | 0.999 | 9.95E-01 | 9.95E+01 |  |  |

|         |             |           |                                      |        |       |          |          |  |  |
|---------|-------------|-----------|--------------------------------------|--------|-------|----------|----------|--|--|
| 8065433 | NM_020531   | C20orf3   | chromosome 20 open reading fram      | 0.033  | 1.023 | 9.12E-01 | 9.12E+01 |  |  |
| 8065444 | NM_032501   | ACSS1     | acyl-CoA synthetase short-chain fa   | 0.019  | 1.014 | 9.01E-01 | 9.01E+01 |  |  |
| 8065460 | NM_014588   | VXS1      | visual system homeobox 1             | 0.039  | 1.027 | 6.94E-01 | 6.94E+01 |  |  |
| 8065469 | NM_00104247 | ABHD12    | abhydrolase domain containing 12     | 0.213  | 1.159 | 1.42E-01 | 1.42E+01 |  |  |
| 8065485 | NM_025176   | NINL      | ninein-like                          | 0.028  | 1.020 | 7.73E-01 | 7.73E+01 |  |  |
| 8065510 | NM_152667   | NANP      | N-acetylneuraminic acid phosphat     | 0.124  | 1.090 | 3.88E-01 | 3.88E+01 |  |  |
| 8065517 | NM_015655   | ZNF337    | zinc finger protein 337              | -0.097 | 0.935 | 3.04E-01 | 3.04E+01 |  |  |
| 8065527 | NR_026713   | FAM182A   | family with sequence similarity 18   | 0.050  | 1.035 | 5.63E-01 | 5.63E+01 |  |  |
| 8065541 | NR_003678   | C20orf191 | nuclear receptor co-repressor 1 ps   | 0.025  | 1.017 | 9.47E-01 | 9.47E+01 |  |  |
| 8065550 | ---         | ---       | ---                                  | -0.053 | 0.964 | 7.60E-01 | 7.60E+01 |  |  |
| 8065566 | NM_00103750 | DEFB124   | defensin, beta 124                   | -0.056 | 0.962 | 6.89E-01 | 6.89E+01 |  |  |
| 8065569 | NM_138578   | BCL2L1    | BCL2-like 1                          | 0.073  | 1.052 | 7.51E-01 | 7.51E+01 |  |  |
| 8065576 | NM_004118   | FOXS1     | forkhead box S1                      | -0.061 | 0.959 | 5.08E-01 | 5.08E+01 |  |  |
| 8065580 | NM_080611   | DUSP15    | dual specificity phosphatase 15      | -0.028 | 0.981 | 7.92E-01 | 7.92E+01 |  |  |
| 8065596 | NM_030815   | PDRG1     | p53 and DNA-damage regulated 1       | 0.021  | 1.014 | 9.19E-01 | 9.19E+01 |  |  |
| 8065603 | NR_002781   | TSPYL3    | TSPY-like 3 (pseudogene)             | -0.051 | 0.965 | 6.91E-01 | 6.91E+01 |  |  |
| 8065607 | NM_002657   | PLAGL2    | pleiomorphic adenoma gene-like 2     | -0.258 | 0.836 | 2.06E-02 | 2.06E+00 |  |  |
| 8065612 | NM_080616   | C20orf112 | chromosome 20 open reading fram      | -0.134 | 0.912 | 6.75E-02 | 6.75E+00 |  |  |
| 8065633 | ---         | ---       | ---                                  | 0.042  | 1.029 | 8.89E-01 | 8.89E+01 |  |  |
| 8065637 | NM_053041   | COMM7     | COMM domain containing 7             | -0.063 | 0.957 | 6.10E-01 | 6.10E+01 |  |  |
| 8065668 | NM_016408   | CDK5RAP1  | CDK5 regulatory subunit associate    | 0.016  | 1.011 | 9.53E-01 | 9.53E+01 |  |  |
| 8065683 | NM_003098   | SNTA1     | syntrophin, alpha 1 (dystrophin-as   | -0.011 | 0.993 | 9.53E-01 | 9.53E+01 |  |  |
| 8065693 | NM_031232   | NECAB3    | N-terminal EF-hand calcium bindin    | -0.073 | 0.950 | 2.66E-01 | 2.66E+01 |  |  |
| 8065710 | NM_005225   | E2F1      | E2F transcription factor 1           | -0.081 | 0.945 | 2.45E-01 | 2.45E+01 |  |  |
| 8065730 | NM_003908   | EIF2S2    | eukaryotic translation initiation fa | -0.040 | 0.973 | 8.15E-01 | 8.15E+01 |  |  |
| 8065738 | NM_000687   | AHCY      | adenosylhomocysteinase               | 0.080  | 1.057 | 4.03E-01 | 4.03E+01 |  |  |
| 8065752 | ---         | ---       | ---                                  | 0.155  | 1.114 | 6.27E-01 | 6.27E+01 |  |  |
| 8065756 | ---         | ---       | ---                                  | 0.088  | 1.063 | 6.60E-01 | 6.60E+01 |  |  |
| 8065762 | NM_080476   | PIGU      | phosphatidylinositol glycan ancho    | -0.096 | 0.936 | 5.33E-01 | 5.33E+01 |  |  |
| 8065776 | NM_014071   | NCOA6     | nuclear receptor coactivator 6       | -0.044 | 0.970 | 7.09E-01 | 7.09E+01 |  |  |
| 8065795 | NR_002165   | HMGB3L1   | high-mobility group box 3-like 1     | 0.032  | 1.022 | 8.89E-01 | 8.89E+01 |  |  |
| 8065798 | NM_178026   | GGT7      | gamma-glutamyltransferase 7          | -0.043 | 0.971 | 7.53E-01 | 7.53E+01 |  |  |
| 8065817 | NM_000178   | GSS       | glutathione synthetase               | 0.020  | 1.014 | 9.19E-01 | 9.19E+01 |  |  |
| 8065832 | NM_015638   | TRPC4AP   | transient receptor potential cation  | 0.037  | 1.026 | 7.67E-01 | 7.67E+01 |  |  |
| 8065855 | NR_026728   | EDEM2     | ER degradation enhancer, mannos      | 0.201  | 1.150 | 6.30E-02 | 6.30E+00 |  |  |
| 8065868 | NM_002212   | EIF6      | eukaryotic translation initiation fa | -0.084 | 0.944 | 4.25E-01 | 4.25E+01 |  |  |
| 8065880 | NM_178468   | FAM83C    | family with sequence similarity 83   | -0.011 | 0.992 | 9.51E-01 | 9.51E+01 |  |  |
| 8065889 | NM_018244   | UQC       | ubiquinol-cytochrome c reductase     | -0.033 | 0.978 | 8.84E-01 | 8.84E+01 |  |  |
| 8065903 | ---         | ---       | ---                                  | -0.023 | 0.984 | 9.67E-01 | 9.67E+01 |  |  |
| 8065920 | NR_024377   | FER1L4    | fer-1-like 4 (C. elegans)            | -0.021 | 0.986 | 8.73E-01 | 8.73E+01 |  |  |
| 8065948 | NR_024377   | FER1L4    | fer-1-like 4 (C. elegans)            | 0.015  | 1.011 | 9.40E-01 | 9.40E+01 |  |  |
| 8065963 | NM_152930   | CPNE1     | copine 1                             | -0.024 | 0.983 | 8.27E-01 | 8.27E+01 |  |  |
| 8065990 | ---         | ---       | ---                                  | 0.007  | 1.005 | 9.91E-01 | 9.91E+01 |  |  |
| 8065992 | NM_021100   | NFS1      | NFS1 nitrogen fixation 1 homolog     | 0.006  | 1.004 | 9.74E-01 | 9.74E+01 |  |  |
| 8066009 | NM_184234   | RBM39     | RNA binding motif protein 39         | -0.015 | 0.990 | 8.88E-01 | 8.88E+01 |  |  |
| 8066031 | NM_016558   | SCAND1    | SCAN domain containing 1             | -0.019 | 0.987 | 8.89E-01 | 8.89E+01 |  |  |
| 8066038 | NM_032214   | SLA2      | Src-like-adaptor 2                   | -0.090 | 0.939 | 7.38E-01 | 7.38E+01 |  |  |
| 8066051 | NM_032013   | NDRG3     | NDRG family member 3                 | -0.069 | 0.953 | 7.53E-01 | 7.53E+01 |  |  |
| 8066091 | BC113405    | C20orf117 | chromosome 20 open reading fram      | 0.078  | 1.056 | 4.02E-01 | 4.02E+01 |  |  |
| 8066136 | NM_002895   | RBL1      | retinoblastoma-like 1 (p107)         | 0.033  | 1.023 | 8.68E-01 | 8.68E+01 |  |  |
| 8066189 | NM_021081   | GHRH      | growth hormone releasing hormo       | 0.014  | 1.010 | 9.38E-01 | 9.38E+01 |  |  |
| 8066195 | NM_006698   | BLCAP     | bladder cancer associated protein    | 0.048  | 1.034 | 6.04E-01 | 6.04E+01 |  |  |
| 8066198 | ---         | ---       | ---                                  | -0.022 | 0.985 | 9.00E-01 | 9.00E+01 |  |  |
| 8066200 | BC013755    | KIAA0406  | KIAA0406                             | 0.035  | 1.025 | 8.21E-01 | 8.21E+01 |  |  |
| 8066210 | ---         | ---       | ---                                  | 0.432  | 1.349 | 6.21E-01 | 6.21E+01 |  |  |
| 8066212 | ---         | ---       | ---                                  | 0.002  | 1.001 | 9.96E-01 | 9.96E+01 |  |  |
| 8066214 | NM_004613   | TGM2      | transglutaminase 2 (C polypeptide    | -0.013 | 0.991 | 9.70E-01 | 9.70E+01 |  |  |
| 8066231 | NM_00102986 | KIAA1755  | KIAA1755                             | 0.027  | 1.019 | 8.46E-01 | 8.46E+01 |  |  |
| 8066247 | NR_027241   | LOC388796 | hypothetical LOC388796               | -0.018 | 0.988 | 9.51E-01 | 9.51E+01 |  |  |
| 8066254 | BC012894    | LOC388796 | hypothetical LOC388796               | 0.154  | 1.113 | 4.94E-01 | 4.94E+01 |  |  |
| 8066256 | NR_002910   | SNORA71B  | small nucleolar RNA, H/ACA box 7     | -0.040 | 0.973 | 8.70E-01 | 8.70E+01 |  |  |
| 8066260 | NR_003017   | SNORA71C  | small nucleolar RNA, H/ACA box 7     | 0.017  | 1.012 | 9.23E-01 | 9.23E+01 |  |  |
| 8066262 | NR_003018   | SNORA71D  | small nucleolar RNA, H/ACA box 7     | 0.084  | 1.060 | 7.83E-01 | 7.83E+01 |  |  |
| 8066275 | ---         | ---       | ---                                  | 0.266  | 1.203 | 2.78E-01 | 2.78E+01 |  |  |
| 8066279 | NM_015035   | ZHX3      | zinc fingers and homeoboxes 3        | -0.051 | 0.965 | 6.16E-01 | 6.16E+01 |  |  |
| 8066294 | NM_052846   | EMILIN3   | elastin microfibril interfacier 3    | -0.030 | 0.980 | 8.00E-01 | 8.00E+01 |  |  |
| 8066303 | NM_032221   | CHD6      | chromodomain helicase DNA bind       | -0.159 | 0.895 | 7.74E-02 | 7.74E+00 |  |  |
| 8066384 | NM_176791   | GTSF1L    | gametocyte specific factor 1-like    | -0.050 | 0.966 | 7.92E-01 | 7.92E+01 |  |  |
| 8066391 | ---         | ---       | ---                                  | 0.008  | 1.006 | 9.80E-01 | 9.80E+01 |  |  |
| 8066393 | NM_020433   | JPH2      | junctionophilin 2                    | -0.026 | 0.982 | 8.56E-01 | 8.56E+01 |  |  |
| 8066402 | NM_016470   | C20orf111 | chromosome 20 open reading fram      | -0.072 | 0.952 | 7.25E-01 | 7.25E+01 |  |  |
| 8066407 | NM_00108047 | FITM2     | fat storage-inducing transmembra     | 0.057  | 1.040 | 7.78E-01 | 7.78E+01 |  |  |
| 8066417 | NM_006811   | SERINC3   | serine incorporator 3                | -0.065 | 0.956 | 5.46E-01 | 5.46E+01 |  |  |
| 8066431 | NM_000022   | ADA       | adenosine deaminase                  | -0.072 | 0.952 | 7.52E-01 | 7.52E+01 |  |  |
| 8066444 | ---         | ---       | ---                                  | -0.057 | 0.961 | 8.36E-01 | 8.36E+01 |  |  |
| 8066451 | NM_182970   | RIMS4     | regulating synaptic membrane exc     | -0.023 | 0.984 | 8.67E-01 | 8.67E+01 |  |  |
| 8066459 | ---         | ---       | ---                                  | -0.011 | 0.992 | 9.77E-01 | 9.77E+01 |  |  |

|         |              |               |                                      |        |       |          |          |
|---------|--------------|---------------|--------------------------------------|--------|-------|----------|----------|
| 8066461 | NM_006809    | TOMM34        | translocase of outer mitochondria    | -0.048 | 0.967 | 8.56E-01 | 8.56E+01 |
| 8066482 | NM_145652    | WFDC5         | WAP four-disulfide core domain 5     | 0.008  | 1.006 | 9.66E-01 | 9.66E+01 |
| 8066489 | NM_080869    | WFDC12        | WAP four-disulfide core domain 1     | 0.014  | 1.010 | 9.51E-01 | 9.51E+01 |
| 8066498 | NM_003833    | MATN4         | matrilin 4                           | -0.086 | 0.942 | 3.01E-01 | 3.01E+01 |
| 8066513 | NM_002999    | SDC4          | syndecan 4                           | -0.040 | 0.973 | 8.92E-01 | 8.92E+01 |
| 8066521 | NM_014477    | TP53TG5       | TP53 target 5                        | 0.049  | 1.034 | 7.18E-01 | 7.18E+01 |
| 8066528 | ENST00000425 | PIGT          | phosphatidylinositol glycan ancho    | -0.134 | 0.911 | 4.49E-01 | 4.49E+01 |
| 8066536 | NM_080827    | WFDC6         | WAP four-disulfide core domain 6     | 0.053  | 1.038 | 5.94E-01 | 5.94E+01 |
| 8066557 | ---          | ---           | ---                                  | 0.041  | 1.029 | 8.48E-01 | 8.48E+01 |
| 8066567 | ---          | ---           | ---                                  | -0.026 | 0.982 | 8.16E-01 | 8.16E+01 |
| 8066574 | NM_172006    | WFDC10B       | WAP four-disulfide core domain 1     | -0.026 | 0.982 | 8.64E-01 | 8.64E+01 |
| 8066579 | NM_080614    | WFDC3         | WAP four-disulfide core domain 3     | -0.086 | 0.942 | 6.00E-01 | 6.00E+01 |
| 8066590 | NM_003279    | TNNC2         | troponin C type 2 (fast)             | -0.073 | 0.950 | 4.69E-01 | 4.69E+01 |
| 8066598 | NM_005469    | ACOT8         | acyl-CoA thioesterase 8              | -0.077 | 0.948 | 4.35E-01 | 4.35E+01 |
| 8066609 | NM_080608    | C20orf165     | chromosome 20 open reading fran      | -0.023 | 0.984 | 8.66E-01 | 8.66E+01 |
| 8066612 | NM_080749    | NEURL2        | neuralized homolog 2 (Drosophila     | 0.003  | 1.002 | 9.89E-01 | 9.89E+01 |
| 8066619 | NM_006227    | PLTP          | phospholipid transfer protein        | 0.127  | 1.092 | 1.55E-01 | 1.55E+01 |
| 8066637 | AK097925     | FLJ40606      | hypothetical protein LOC643549       | -0.066 | 0.956 | 5.73E-01 | 5.73E+01 |
| 8066641 | NM_022095    | ZNF335        | zinc finger protein 335              | -0.051 | 0.965 | 5.14E-01 | 5.14E+01 |
| 8066668 | NM_020967    | NCOA5         | nuclear receptor coactivator 5       | 0.013  | 1.009 | 9.42E-01 | 9.42E+01 |
| 8066683 | NM_021248    | CDH22         | cadherin-like 22                     | 0.044  | 1.031 | 7.15E-01 | 7.15E+01 |
| 8066697 | NM_173179    | SLC35C2       | solute carrier family 35, member C   | 0.006  | 1.004 | 9.76E-01 | 9.76E+01 |
| 8066716 | NM_133171    | ELMO2         | engulfment and cell motility 2       | 0.123  | 1.089 | 4.09E-01 | 4.09E+01 |
| 8066754 | NM_080721    | C20orf123     | chromosome 20 open reading fran      | -0.009 | 0.994 | 9.61E-01 | 9.61E+01 |
| 8066757 | NM_022829    | SLC13A3       | solute carrier family 13 (sodium-d   | 0.002  | 1.002 | 9.87E-01 | 9.87E+01 |
| 8066776 | NM_033550    | TP53RK        | TP53 regulating kinase               | 0.022  | 1.015 | 9.16E-01 | 9.16E+01 |
| 8066786 | NM_183047    | ZMYND8        | zinc finger, MYND-type containing    | 0.113  | 1.082 | 2.10E-01 | 2.10E+01 |
| 8066820 | ---          | ---           | ---                                  | 0.075  | 1.053 | 6.10E-01 | 6.10E+01 |
| 8066822 | NM_018837    | SULF2         | sulfatase 2                          | 0.022  | 1.015 | 9.47E-01 | 9.47E+01 |
| 8066848 | NM_020820    | PREX1         | phosphatidylinositol-3,4,5-trispho   | -0.046 | 0.969 | 7.77E-01 | 7.77E+01 |
| 8066889 | NM_017453    | STAU1         | staufen, RNA binding protein, hon    | -0.003 | 0.998 | 9.86E-01 | 9.86E+01 |
| 8066905 | NM_021035    | ZNFX1         | zinc finger, NFX1-type containing 1  | 0.033  | 1.023 | 8.63E-01 | 8.63E+01 |
| 8066939 | NM_004776    | B4GALT5       | UDP-Gal:betaGlcNAc beta 1,4- gal     | 0.273  | 1.209 | 2.84E-01 | 2.84E+01 |
| 8066953 | NM_006038    | SPATA2        | spermatogenesis associated 2         | -0.018 | 0.987 | 9.33E-01 | 9.33E+01 |
| 8066964 | NM_199129    | TMEM189       | transmembrane protein 189            | -0.107 | 0.929 | 1.62E-01 | 1.62E+01 |
| 8066983 | ---          | ---           | ---                                  | 0.054  | 1.038 | 8.53E-01 | 8.53E+01 |
| 8066985 | AK299337     | FAM65C        | family with sequence similarity 65   | -0.006 | 0.996 | 9.74E-01 | 9.74E+01 |
| 8067007 | NM_021109    | TMSB4X        | thymosin beta 4, X-linked            | -0.029 | 0.980 | 7.59E-01 | 7.59E+01 |
| 8067011 | NM_015339    | ADNP          | activity-dependent neuroprotecto     | -0.002 | 0.999 | 9.92E-01 | 9.92E+01 |
| 8067017 | NM_003859    | DPM1          | dolichyl-phosphate mannosyltrans     | -0.057 | 0.961 | 6.73E-01 | 6.73E+01 |
| 8067029 | NM_002237    | KCNG1         | potassium voltage-gated channel,     | 0.003  | 1.002 | 9.86E-01 | 9.86E+01 |
| 8067033 | NM_002237    | KCNG1         | potassium voltage-gated channel,     | 0.017  | 1.012 | 9.00E-01 | 9.00E+01 |
| 8067040 | NM_012340    | NFATC2        | nuclear factor of activated T-cells, | -0.180 | 0.883 | 9.19E-02 | 9.19E+00 |
| 8067113 | NM_006526    | ZNF217        | zinc finger protein 217              | 0.007  | 1.005 | 9.73E-01 | 9.73E+01 |
| 8067121 | NR_002189    | SUMO1P1       | SUMO1 pseudogene 1                   | 0.005  | 1.003 | 9.86E-01 | 9.86E+01 |
| 8067125 | NM_003657    | BCAS1         | breast carcinoma amplified seque     | -0.074 | 0.950 | 6.64E-01 | 6.64E+01 |
| 8067167 | NM_198433    | AURKA         | aurora kinase A                      | 0.086  | 1.062 | 7.77E-01 | 7.77E+01 |
| 8067178 | NM_080615    | GCNT7         | glucosaminyl (N-acetyl) transferas   | -0.047 | 0.968 | 7.86E-01 | 7.86E+01 |
| 8067183 | ---          | ---           | ---                                  | 0.068  | 1.048 | 4.47E-01 | 4.47E+01 |
| 8067199 | ---          | ---           | ---                                  | 0.218  | 1.164 | 6.66E-01 | 6.66E+01 |
| 8067201 | ---          | ---           | ---                                  | 0.150  | 1.109 | 5.29E-01 | 5.29E+01 |
| 8067203 | ENST00000371 | RBM38         | RNA binding motif protein 38         | -0.076 | 0.949 | 5.96E-01 | 5.96E+01 |
| 8067206 | NM_00100873  | HMGB1L1       | high-mobility group box 1-like 1     | 0.033  | 1.023 | 8.66E-01 | 8.66E+01 |
| 8067208 | NM_080618    | CTCF          | CCCTC-binding factor (zinc finger p  | -0.038 | 0.974 | 7.57E-01 | 7.57E+01 |
| 8067221 | NM_030776    | ZBP1          | Z-DNA binding protein 1              | 0.040  | 1.028 | 8.77E-01 | 8.77E+01 |
| 8067233 | NM_020182    | PMEPA1        | prostate transmembrane protein,      | -0.281 | 0.823 | 1.45E-04 | 1.45E-02 |
| 8067242 | ENST00000457 | ANKRD60       | ankyrin repeat domain 60             | -0.067 | 0.954 | 3.95E-01 | 3.95E+01 |
| 8067248 | NR_003505    | PPP4R1L       | protein phosphatase 4, regulatory    | 0.002  | 1.001 | 9.96E-01 | 9.96E+01 |
| 8067270 | NM_153360    | APCDD1L       | adenomatosis polyposis coli down     | -0.043 | 0.971 | 5.83E-01 | 5.83E+01 |
| 8067277 | ---          | ---           | ---                                  | -0.091 | 0.939 | 2.96E-01 | 2.96E+01 |
| 8067288 | NM_00100197  | ATP5E         | ATP synthase, H+ transporting, mi    | 0.141  | 1.103 | 1.05E-01 | 1.05E+01 |
| 8067295 | NM_016045    | SLMO2         | slowmo homolog 2 (Drosophila)        | 0.033  | 1.023 | 7.42E-01 | 7.42E+01 |
| 8067303 | ---          | ---           | ---                                  | -0.004 | 0.997 | 9.87E-01 | 9.87E+01 |
| 8067351 | NM_006242    | PPP1R3D       | protein phosphatase 1, regulatory    | -0.002 | 0.998 | 9.88E-01 | 9.88E+01 |
| 8067358 | AK097866     | RP11-429E11.3 | hypothetical LOC100128310            | -0.044 | 0.970 | 8.47E-01 | 8.47E+01 |
| 8067361 | NM_003185    | TAF4          | TAF4 RNA polymerase II, TATA box     | -0.034 | 0.977 | 7.61E-01 | 7.61E+01 |
| 8067380 | NM_144703    | LSM14B        | LSM14B, SCD6 homolog B (S. cere      | -0.114 | 0.924 | 6.80E-01 | 6.80E+01 |
| 8067382 | NM_002792    | PSMA7         | proteasome (prosome, macropain       | -0.038 | 0.974 | 8.05E-01 | 8.05E+01 |
| 8067394 | NM_007232    | HRH3          | histamine receptor H3                | 0.015  | 1.011 | 9.07E-01 | 9.07E+01 |
| 8067409 | NM_005560    | LAMA5         | laminin, alpha 5                     | -0.038 | 0.974 | 5.48E-01 | 5.48E+01 |
| 8067495 | NM_031215    | CABLES2       | Cdk5 and Abl enzyme substrate 2      | 0.075  | 1.053 | 6.05E-01 | 6.05E+01 |
| 8067506 | BC137326     | C20orf151     | chromosome 20 open reading fran      | 0.033  | 1.023 | 7.83E-01 | 7.83E+01 |
| 8067521 | NM_080473    | GATA5         | GATA binding protein 5               | 0.024  | 1.017 | 7.58E-01 | 7.58E+01 |
| 8067530 | BC093856     | C20orf200     | chromosome 20 open reading fran      | 0.003  | 1.002 | 9.86E-01 | 9.86E+01 |
| 8067543 | ENST00000370 | RP11-93B14.6  | hypothetical protein FLJ32154        | 0.035  | 1.024 | 7.97E-01 | 7.97E+01 |
| 8067546 | NR_024470    | hCG_2018279   | hypothetical protein LOC1001278      | -0.056 | 0.962 | 6.11E-01 | 6.11E+01 |
| 8067551 | ENST00000415 | C20orf90      | chromosome 20 open reading fran      | -0.003 | 0.998 | 9.86E-01 | 9.86E+01 |

|         |             |           |                                                           |        |       |          |          |  |
|---------|-------------|-----------|-----------------------------------------------------------|--------|-------|----------|----------|--|
| 8067554 | NM_006602   | TCFL5     | transcription factor-like 5 (basic helix-loop-helix)      | -0.025 | 0.983 | 8.63E-01 | 8.63E+01 |  |
| 8067563 | NM_033081   | DIDO1     | death inducer-oblierator 1                                | -0.035 | 0.976 | 6.92E-01 | 6.92E+01 |  |
| 8067585 | NM_080606   | BHLHE23   | basic helix-loop-helix family, member 23                  | -0.033 | 0.977 | 8.08E-01 | 8.08E+01 |  |
| 8067593 | NM_017798   | YTHDF1    | YTH domain family, member 1                               | 0.012  | 1.008 | 9.45E-01 | 9.45E+01 |  |
| 8067602 | NM_152864   | NKAIN4    | Na+/K+ transporting ATPase interacting protein 4          | -0.092 | 0.938 | 4.25E-01 | 4.25E+01 |  |
| 8067652 | NM_001958   | EEF1A2    | eukaryotic translation elongation factor 1A2              | -0.062 | 0.958 | 3.64E-01 | 3.64E+01 |  |
| 8067662 | NM_005975   | PTK6      | PTK6 protein tyrosine kinase 6                            | -0.010 | 0.993 | 9.50E-01 | 9.50E+01 |  |
| 8067671 | NM_080823   | SRMS      | src-related kinase lacking C-terminal domain              | -0.079 | 0.947 | 3.83E-01 | 3.83E+01 |  |
| 8067680 | NM_00103733 | PRIC285   | peroxisomal proliferator-activated receptor gamma 285     | -0.021 | 0.986 | 8.67E-01 | 8.67E+01 |  |
| 8067709 | NM_012384   | GMEB2     | glucocorticoid modulatory element binding protein 2       | -0.068 | 0.954 | 4.85E-01 | 4.85E+01 |  |
| 8067722 | NM_015894   | STMN3     | stathmin-like 3                                           | -0.045 | 0.969 | 7.82E-01 | 7.82E+01 |  |
| 8067727 | NM_003224   | ARFRP1    | ADP-ribosylation factor related protein 1                 | -0.059 | 0.960 | 5.55E-01 | 5.55E+01 |  |
| 8067743 | NM_025224   | ZBTB46    | zinc finger and BTB domain containing protein 46          | 0.005  | 1.003 | 9.82E-01 | 9.82E+01 |  |
| 8067754 | U63828      | C20orf181 | chromosome 20 open reading frame 181                      | -0.049 | 0.967 | 6.89E-01 | 6.89E+01 |  |
| 8067756 | NM_017859   | UCKL1     | uridine-cytidine kinase 1-like 1                          | -0.007 | 0.995 | 9.73E-01 | 9.73E+01 |  |
| 8067773 | NM_020713   | ZNF512B   | zinc finger protein 512B                                  | 0.027  | 1.019 | 8.65E-01 | 8.65E+01 |  |
| 8067792 | NM_080621   | SAMD10    | sterile alpha motif domain containing protein 10          | -0.050 | 0.966 | 6.92E-01 | 6.92E+01 |  |
| 8067798 | NM_018419   | SOX18     | SOX (sex determining region Y)-box 18                     | -0.001 | 1.000 | 9.98E-01 | 9.98E+01 |  |
| 8067802 | NM_00103946 | RGS19     | regulator of G-protein signaling 19                       | -0.007 | 0.995 | 9.63E-01 | 9.63E+01 |  |
| 8067812 | BC036837    | C20orf201 | chromosome 20 open reading frame 201                      | -0.038 | 0.974 | 7.78E-01 | 7.78E+01 |  |
| 8067820 | BC024764    | IQSEC3    | IQ motif and Sec7 domain containing protein 3             | -0.039 | 0.973 | 6.25E-01 | 6.25E+01 |  |
| 8067864 | NR_003366   | ANKRD20B  | ankyrin repeat domain 20B                                 | -0.173 | 0.887 | 3.38E-01 | 3.38E+01 |  |
| 8067867 | ---         | ---       | ---                                                       | -0.109 | 0.927 | 2.08E-01 | 2.08E+01 |  |
| 8067903 | NM_013396   | USP25     | ubiquitin specific peptidase 25                           | 0.053  | 1.038 | 5.67E-01 | 5.67E+01 |  |
| 8067955 | NM_001338   | CXADR     | coxsackievirus and adenovirus receptor                    | -0.020 | 0.986 | 8.85E-01 | 8.85E+01 |  |
| 8067978 | NM_021130   | PPIA      | peptidylprolyl isomerase A (cyclophilin)                  | -0.035 | 0.976 | 6.80E-01 | 6.80E+01 |  |
| 8068022 | NR_001458   | MIR155HG  | MIR155 host gene (non-protein coding)                     | -0.336 | 0.792 | 3.82E-01 | 3.82E+01 |  |
| 8068039 | NM_002040   | GABPA     | GA binding protein transcription factor A                 | 0.015  | 1.011 | 9.24E-01 | 9.24E+01 |  |
| 8068062 | NM_006447   | USP16     | ubiquitin specific peptidase 16                           | -0.015 | 0.990 | 9.22E-01 | 9.22E+01 |  |
| 8068083 | NM_020152   | C21orf7   | chromosome 21 open reading frame 7                        | 0.221  | 1.165 | 8.01E-02 | 8.01E+00 |  |
| 8068105 | NR_027655   | BACH1     | BTB and CNC homology 1, basic helix-loop-helix            | -0.155 | 0.898 | 5.29E-01 | 5.29E+01 |  |
| 8068136 | NM_181600   | KRTAP13-4 | keratin associated protein 13-4                           | 0.021  | 1.015 | 8.94E-01 | 8.94E+01 |  |
| 8068145 | NM_181605   | KRTAP6-3  | keratin associated protein 6-3                            | -0.047 | 0.968 | 6.89E-01 | 6.89E+01 |  |
| 8068157 | NR_023342   | KRTAP20-4 | keratin associated protein 20-4                           | -0.043 | 0.971 | 8.06E-01 | 8.06E+01 |  |
| 8068168 | NM_000454   | SOD1      | superoxide dismutase 1, soluble                           | -0.073 | 0.951 | 4.27E-01 | 4.27E+01 |  |
| 8068192 | NM_178817   | MRAP      | melanocortin 2 receptor accessory protein                 | -0.045 | 0.970 | 7.51E-01 | 7.51E+01 |  |
| 8068200 | NR_026845   | C21orf119 | chromosome 21 open reading frame 119                      | -0.051 | 0.965 | 6.51E-01 | 6.51E+01 |  |
| 8068202 | NM_058187   | C21orf63  | chromosome 21 open reading frame 63                       | -0.095 | 0.936 | 5.34E-01 | 5.34E+01 |  |
| 8068214 | ---         | ---       | ---                                                       | -0.194 | 0.874 | 6.53E-01 | 6.53E+01 |  |
| 8068218 | ---         | ---       | ---                                                       | -0.115 | 0.924 | 6.92E-01 | 6.92E+01 |  |
| 8068235 | NM_138983   | OLIG1     | oligodendrocyte transcription factor 1                    | -0.038 | 0.974 | 6.18E-01 | 6.18E+01 |  |
| 8068238 | NM_207585   | IFNAR2    | interferon (alpha, beta and omega) receptor 2             | 0.251  | 1.190 | 2.82E-02 | 2.82E+00 |  |
| 8068254 | NM_000628   | IL10RB    | interleukin 10 receptor, beta                             | 0.164  | 1.120 | 4.39E-01 | 4.39E+01 |  |
| 8068266 | NM_000629   | IFNAR1    | interferon (alpha, beta and omega) receptor 1             | 0.107  | 1.077 | 6.19E-01 | 6.19E+01 |  |
| 8068280 | NM_005534   | IFNGR2    | interferon gamma receptor 2 (interleukin 10 receptor)     | 0.305  | 1.235 | 1.02E-01 | 1.02E+01 |  |
| 8068289 | NM_138927   | SON       | SON DNA binding protein                                   | 0.002  | 1.002 | 9.86E-01 | 9.86E+01 |  |
| 8068305 | NM_003024   | ITSN1     | intersectin 1 (SH3 domain protein)                        | 0.058  | 1.041 | 7.98E-01 | 7.98E+01 |  |
| 8068350 | AK127913    | FLJ46020  | FLJ46020 protein                                          | 0.051  | 1.036 | 8.69E-01 | 8.69E+01 |  |
| 8068363 | NR_027267   | C21orf82  | chromosome 21 open reading frame 82                       | -0.176 | 0.885 | 3.09E-01 | 3.09E+01 |  |
| 8068375 | NM_058182   | FAM165B   | family with sequence similarity 165B                      | 0.033  | 1.023 | 8.57E-01 | 8.57E+01 |  |
| 8068397 | ---         | ---       | ---                                                       | 0.041  | 1.029 | 9.09E-01 | 9.09E+01 |  |
| 8068401 | NM_001757   | CBR1      | carbonyl reductase 1                                      | 0.101  | 1.072 | 5.38E-01 | 5.38E+01 |  |
| 8068410 | NM_015955   | MEMO1     | mediator of cell motility 1                               | 0.116  | 1.084 | 1.57E-01 | 1.57E+01 |  |
| 8068413 | NM_001236   | CBR3      | carbonyl reductase 3                                      | -0.096 | 0.936 | 6.34E-01 | 6.34E+01 |  |
| 8068422 | NM_005128   | DOPEY2    | dopey family member 2                                     | 0.129  | 1.094 | 3.28E-01 | 3.28E+01 |  |
| 8068460 | NM_015358   | MORC3     | MORC family CW-type zinc finger protein 3                 | 0.013  | 1.009 | 9.39E-01 | 9.39E+01 |  |
| 8068478 | NM_005441   | CHAF1B    | chromatin assembly factor 1, subunit B                    | 0.021  | 1.015 | 9.42E-01 | 9.42E+01 |  |
| 8068494 | ---         | ---       | ---                                                       | -0.074 | 0.950 | 6.41E-01 | 6.41E+01 |  |
| 8068496 | NM_009586   | SIM2      | single-minded homolog 2 (Drosophila)                      | -0.046 | 0.968 | 5.83E-01 | 5.83E+01 |  |
| 8068510 | ---         | ---       | ---                                                       | -0.024 | 0.983 | 8.99E-01 | 8.99E+01 |  |
| 8068512 | NM_018962   | DSCR6     | Down syndrome critical region gene 6                      | -0.059 | 0.960 | 5.90E-01 | 5.90E+01 |  |
| 8068522 | NM_003316   | TTC3      | tetratricopeptide repeat domain 3                         | 0.019  | 1.013 | 9.42E-01 | 9.42E+01 |  |
| 8068549 | ---         | ---       | ---                                                       | 0.104  | 1.075 | 4.13E-01 | 4.13E+01 |  |
| 8068551 | NM_101395   | DYRK1A    | dual-specificity tyrosine-(Y)-phosphatase 1A              | -0.028 | 0.981 | 8.13E-01 | 8.13E+01 |  |
| 8068583 | NM_002243   | KCNJ15    | potassium inwardly-rectifying channel subunit 15          | 0.352  | 1.276 | 4.25E-01 | 4.25E+01 |  |
| 8068610 | ---         | ---       | ---                                                       | 0.139  | 1.101 | 6.91E-01 | 6.91E+01 |  |
| 8068612 | NM_004627   | WRB       | tryptophan rich basic protein                             | -0.124 | 0.918 | 5.04E-01 | 5.04E+01 |  |
| 8068651 | NM_006198   | PCP4      | Purkinje cell protein 4                                   | 0.021  | 1.015 | 8.67E-01 | 8.67E+01 |  |
| 8068671 | NM_012105   | BACE2     | beta-site APP-cleaving enzyme 2                           | 0.033  | 1.023 | 7.73E-01 | 7.73E+01 |  |
| 8068697 | NM_002463   | MX2       | myxovirus (influenza virus) resistance protein 2          | 0.245  | 1.185 | 5.05E-01 | 5.05E+01 |  |
| 8068713 | NM_002462   | MX1       | myxovirus (influenza virus) resistance protein 1          | 0.373  | 1.295 | 4.42E-01 | 4.42E+01 |  |
| 8068761 | NM_207627   | ABCG1     | ATP-binding cassette, sub-family G member 1               | -0.007 | 0.995 | 9.77E-01 | 9.77E+01 |  |
| 8068788 | NM_018961   | UBASH3A   | ubiquitin associated and SH3 domain containing protein 3A | 0.049  | 1.035 | 8.47E-01 | 8.47E+01 |  |
| 8068810 | NM_018964   | SLC37A1   | solute carrier family 37 (glycerol-3-phosphate) member 1  | 0.017  | 1.012 | 9.37E-01 | 9.37E+01 |  |
| 8068833 | NM_002606   | PDE9A     | phosphodiesterase 9A                                      | 0.040  | 1.028 | 8.76E-01 | 8.76E+01 |  |
| 8068857 | NM_021075   | NDUFV3    | NADH dehydrogenase (ubiquinone) complex 3 subunit 3       | 0.075  | 1.053 | 5.24E-01 | 5.24E+01 |  |
| 8068866 | NM_004571   | PKNOX1    | PBX/knotted 1 homeobox 1                                  | -0.043 | 0.970 | 7.85E-01 | 7.85E+01 |  |

|         |              |            |                                      |        |       |          |          |  |  |
|---------|--------------|------------|--------------------------------------|--------|-------|----------|----------|--|--|
| 8068883 | NM_000394    | CRYAA      | crystallin, alpha A                  | 0.003  | 1.002 | 9.83E-01 | 9.83E+01 |  |  |
| 8068891 | AK123727     | FLJ41733   | FLJ41733 protein                     | 0.019  | 1.013 | 9.28E-01 | 9.28E+01 |  |  |
| 8068898 | NM_080593    | HIST1H2BK  | histone cluster 1, H2bk              | 0.065  | 1.046 | 6.20E-01 | 6.20E+01 |  |  |
| 8068902 | NM_015056    | RRP1B      | ribosomal RNA processing 1 homod     | 0.045  | 1.031 | 7.19E-01 | 7.19E+01 |  |  |
| 8068919 | NM_003681    | PDXK       | pyridoxal (pyridoxine, vitamin B6)   | 0.108  | 1.078 | 5.66E-01 | 5.66E+01 |  |  |
| 8068938 | NM_003683    | RRP1       | ribosomal RNA processing 1 homod     | -0.070 | 0.953 | 4.19E-01 | 4.19E+01 |  |  |
| 8068952 | NM_020132    | AGPAT3     | 1-acylglycerol-3-phosphate O-acyl    | 0.044  | 1.031 | 7.97E-01 | 7.97E+01 |  |  |
| 8068974 | NM_003274    | TRAPPC10   | trafficking protein particle comple  | -0.077 | 0.948 | 5.04E-01 | 5.04E+01 |  |  |
| 8069003 | NM_005049    | PWP2       | PWP2 periodic tryptophan protein     | -0.122 | 0.919 | 9.26E-02 | 9.26E+00 |  |  |
| 8069026 | NM_004649    | C21orf33   | chromosome 21 open reading fram      | 0.009  | 1.006 | 9.50E-01 | 9.50E+01 |  |  |
| 8069037 | NM_000383    | AIRE       | autoimmune regulator                 | -0.035 | 0.976 | 7.27E-01 | 7.27E+01 |  |  |
| 8069057 | NR_024108    | PFKL       | phosphofructokinase, liver           | 0.031  | 1.022 | 8.18E-01 | 8.18E+01 |  |  |
| 8069083 | AB209578     | C21orf2    | chromosome 21 open reading fram      | -0.003 | 0.998 | 9.83E-01 | 9.83E+01 |  |  |
| 8069085 | NM_003307    | TRPM2      | transient receptor potential cation  | -0.048 | 0.967 | 7.56E-01 | 7.56E+01 |  |  |
| 8069122 | NM_030891    | LRRC3      | leucine rich repeat containing 3     | -0.047 | 0.968 | 6.83E-01 | 6.83E+01 |  |  |
| 8069131 | ENST00000443 | C21orf30   | chromosome 21 open reading fram      | 0.049  | 1.035 | 7.87E-01 | 7.87E+01 |  |  |
| 8069135 | NR_026547    | C21orf90   | chromosome 21 open reading fram      | -0.073 | 0.950 | 4.73E-01 | 4.73E+01 |  |  |
| 8069142 | NM_198687    | KRTAP10-4  | keratin associated protein 10-4      | -0.080 | 0.946 | 5.15E-01 | 5.15E+01 |  |  |
| 8069146 | NM_198689    | KRTAP10-7  | keratin associated protein 10-7      | -0.090 | 0.940 | 4.48E-01 | 4.48E+01 |  |  |
| 8069148 | NM_198695    | KRTAP10-8  | keratin associated protein 10-8      | -0.036 | 0.975 | 6.60E-01 | 6.60E+01 |  |  |
| 8069150 | NM_198690    | KRTAP10-9  | keratin associated protein 10-9      | -0.057 | 0.961 | 8.08E-01 | 8.08E+01 |  |  |
| 8069153 | NM_181688    | KRTAP10-10 | keratin associated protein 10-10     | -0.006 | 0.996 | 9.67E-01 | 9.67E+01 |  |  |
| 8069156 | NM_198692    | KRTAP10-11 | keratin associated protein 10-11     | -0.032 | 0.978 | 8.25E-01 | 8.25E+01 |  |  |
| 8069161 | NM_198697    | KRTAP12-3  | keratin associated protein 12-3      | -0.079 | 0.947 | 4.59E-01 | 4.59E+01 |  |  |
| 8069168 | NM_198699    | KRTAP10-12 | keratin associated protein 10-12     | 0.004  | 1.003 | 9.82E-01 | 9.82E+01 |  |  |
| 8069174 | AF391113     | C21orf70   | chromosome 21 open reading fram      | 0.081  | 1.057 | 6.70E-01 | 6.70E+01 |  |  |
| 8069178 | NR_027673    | ADARB1     | adenosine deaminase, RNA-specifi     | -0.152 | 0.900 | 1.61E-01 | 1.61E+01 |  |  |
| 8069200 | AF426268     | C21orf89   | chromosome 21 open reading fram      | 0.036  | 1.025 | 9.00E-01 | 9.00E+01 |  |  |
| 8069208 | NM_030582    | COL18A1    | collagen, type XVIII, alpha 1        | -0.045 | 0.969 | 5.57E-01 | 5.57E+01 |  |  |
| 8069252 | NM_020528    | PCBP3      | poly(rC) binding protein 3           | -0.067 | 0.955 | 5.89E-01 | 5.89E+01 |  |  |
| 8069269 | NM_001848    | COL6A1     | collagen, type VI, alpha 1           | -0.046 | 0.969 | 6.93E-01 | 6.93E+01 |  |  |
| 8069301 | NM_001849    | COL6A2     | collagen, type VI, alpha 2           | -0.006 | 0.996 | 9.68E-01 | 9.68E+01 |  |  |
| 8069332 | NR_002776    | MCM3APAS   | MCM3AP antisense RNA (non-pro        | 0.009  | 1.006 | 9.57E-01 | 9.57E+01 |  |  |
| 8069340 | NM_058181    | C21orf57   | chromosome 21 open reading fram      | -0.036 | 0.976 | 8.75E-01 | 8.75E+01 |  |  |
| 8069348 | NM_006031    | PCNT       | pericentrin                          | -0.086 | 0.942 | 2.93E-01 | 2.93E+01 |  |  |
| 8069399 | NM_015151    | DIP2A      | DIP2 disco-interacting protein 2 ho  | -0.054 | 0.963 | 6.80E-01 | 6.80E+01 |  |  |
| 8069446 | ---          | ---        | ---                                  | 0.045  | 1.032 | 9.01E-01 | 9.01E+01 |  |  |
| 8069448 | ---          | ---        | ---                                  | 0.017  | 1.012 | 9.83E-01 | 9.83E+01 |  |  |
| 8069450 | NM_206962    | PRMT2      | protein arginine methyltransferase   | 0.031  | 1.022 | 8.98E-01 | 8.98E+01 |  |  |
| 8069470 | NR_024528    | RPL23AP7   | ribosomal protein L23a pseudogen     | 0.012  | 1.008 | 9.49E-01 | 9.49E+01 |  |  |
| 8069503 | AK125677     | LOC441956  | similar to cDNA sequence BC0215      | -0.065 | 0.956 | 7.52E-01 | 7.52E+01 |  |  |
| 8069508 | ENST00000333 | CCDC29     | coiled-coil domain containing 29     | 0.067  | 1.047 | 9.24E-01 | 9.24E+01 |  |  |
| 8069511 | NR_027270    | C21orf81   | ankyrin repeat domain 20 family, s   | -0.046 | 0.969 | 8.70E-01 | 8.70E+01 |  |  |
| 8069517 | ---          | ---        | ---                                  | 0.033  | 1.023 | 9.48E-01 | 9.48E+01 |  |  |
| 8069519 | ---          | ---        | ---                                  | 0.046  | 1.032 | 7.51E-01 | 7.51E+01 |  |  |
| 8069532 | NM_006948    | HSPA13     | heat shock protein 70kDa family, n   | -0.037 | 0.975 | 8.72E-01 | 8.72E+01 |  |  |
| 8069541 | NM_022136    | SAMSN1     | SAM domain, SH3 domain and nuc       | -0.281 | 0.823 | 4.56E-02 | 4.56E+00 |  |  |
| 8069553 | NM_003489    | NRIP1      | nuclear receptor interacting prote   | 0.126  | 1.092 | 3.76E-01 | 3.76E+01 |  |  |
| 8069561 | NM_152265    | BTF3L4     | basic transcription factor 3-like 4  | 0.158  | 1.116 | 2.99E-01 | 2.99E+01 |  |  |
| 8069565 | NM_00113091  | BTG3       | BTG family, member 3                 | -0.173 | 0.887 | 1.06E-01 | 1.06E+01 |  |  |
| 8069574 | NM_00110042  | C21orf91   | chromosome 21 open reading fram      | 0.109  | 1.078 | 4.96E-01 | 4.96E+01 |  |  |
| 8069620 | NM_080794    | MRPL39     | mitochondrial ribosomal protein L    | 0.030  | 1.021 | 8.96E-01 | 8.96E+01 |  |  |
| 8069633 | NM_00100370  | ATP5J      | ATP synthase, H+ transporting, mi    | -0.008 | 0.994 | 9.63E-01 | 9.63E+01 |  |  |
| 8069644 | NM_000484    | APP        | amyloid beta (A4) precursor prote    | 0.147  | 1.107 | 5.77E-01 | 5.77E+01 |  |  |
| 8069666 | ---          | ---        | ---                                  | 0.055  | 1.039 | 5.45E-01 | 5.45E+01 |  |  |
| 8069700 | NM_013240    | N6AMT1     | N-6 adenine-specific DNA methylt     | 0.024  | 1.017 | 9.27E-01 | 9.27E+01 |  |  |
| 8069711 | NM_015565    | RNF160     | ring finger protein 160              | 0.086  | 1.061 | 4.47E-01 | 4.47E+01 |  |  |
| 8069744 | NM_016940    | RWDD2B     | RWD domain containing 2B             | 0.163  | 1.119 | 4.48E-01 | 4.48E+01 |  |  |
| 8069753 | NM_006585    | CCT8       | chaperonin containing TCP11, subu    | -0.030 | 0.979 | 7.73E-01 | 7.73E+01 |  |  |
| 8069764 | ---          | ---        | ---                                  | 0.110  | 1.080 | 6.80E-01 | 6.80E+01 |  |  |
| 8069766 | ---          | ---        | ---                                  | 0.015  | 1.011 | 9.74E-01 | 9.74E+01 |  |  |
| 8069768 | ---          | ---        | ---                                  | -0.151 | 0.900 | 6.60E-01 | 6.60E+01 |  |  |
| 8069811 | NM_181624    | KRTAP23-1  | keratin associated protein 23-1      | 0.034  | 1.024 | 8.18E-01 | 8.18E+01 |  |  |
| 8069838 | NM_181611    | KRTAP19-5  | keratin associated protein 19-5      | -0.058 | 0.961 | 7.15E-01 | 7.15E+01 |  |  |
| 8069852 | NM_181602    | KRTAP6-1   | keratin associated protein 6-1       | 0.023  | 1.016 | 8.93E-01 | 8.93E+01 |  |  |
| 8069863 | NM_175857    | KRTAP8-1   | keratin associated protein 8-1       | -0.012 | 0.992 | 9.49E-01 | 9.49E+01 |  |  |
| 8069872 | NM_175858    | KRTAP11-1  | keratin associated protein 11-1      | -0.072 | 0.952 | 3.80E-01 | 3.80E+01 |  |  |
| 8069880 | NM_003253    | TIAM1      | T-cell lymphoma invasion and met     | 0.129  | 1.093 | 4.48E-01 | 4.48E+01 |  |  |
| 8069910 | NM_020706    | SFRS15     | splicing factor, arginine/serine-ric | -0.003 | 0.998 | 9.84E-01 | 9.84E+01 |  |  |
| 8069933 | NM_018944    | C21orf45   | chromosome 21 open reading fram      | -0.150 | 0.902 | 1.76E-01 | 1.76E+01 |  |  |
| 8069943 | NM_014825    | URB1       | URB1 ribosome biogenesis 1 homod     | 0.015  | 1.010 | 9.14E-01 | 9.14E+01 |  |  |
| 8069985 | NR_002996    | SNORA80    | small nucleolar RNA, H/ACA box 8     | -0.025 | 0.982 | 8.88E-01 | 8.88E+01 |  |  |
| 8069987 | NM_144659    | TCP10L     | t-complex 10 (mouse)-like            | -0.065 | 0.956 | 5.19E-01 | 5.19E+01 |  |  |
| 8069998 | AF282851     | C21orf59   | chromosome 21 open reading fram      | -0.050 | 0.966 | 6.83E-01 | 6.83E+01 |  |  |
| 8070010 | NM_003895    | SYNJ1      | synaptotjanin 1                      | 0.305  | 1.236 | 7.65E-03 | 7.65E-01 |  |  |
| 8070046 | NR_027873    | C21orf66   | chromosome 21 open reading fram      | -0.008 | 0.995 | 9.73E-01 | 9.73E+01 |  |  |
| 8070081 | ---          | ---        | ---                                  | 0.030  | 1.021 | 8.32E-01 | 8.32E+01 |  |  |

|         |                             |                      |                                      |        |       |          |          |  |  |
|---------|-----------------------------|----------------------|--------------------------------------|--------|-------|----------|----------|--|--|
| 8070083 | NM_006134                   | TMEM50B              | transmembrane protein 50B            | -0.001 | 1.000 | 9.99E-01 | 9.99E+01 |  |  |
| 8070102 | NM_000819                   | GART                 | phosphoribosylglycinamide formyl     | 0.106  | 1.076 | 2.79E-01 | 2.79E+01 |  |  |
| 8070129 | NM_017613                   | DONSON               | downstream neighbor of SON           | 0.139  | 1.101 | 1.21E-01 | 1.21E+01 |  |  |
| 8070141 | NM_145858                   | CRYZL1               | crystallin, zeta (quinone reductase  | -0.013 | 0.991 | 9.70E-01 | 9.70E+01 |  |  |
| 8070160 | NM_001697                   | ATP5O                | ATP synthase, H+ transporting, mi    | 0.058  | 1.041 | 6.91E-01 | 6.91E+01 |  |  |
| 8070169 | ---                         | ---                  | ---                                  | 0.088  | 1.063 | 5.23E-01 | 5.23E+01 |  |  |
| 8070171 | ---                         | ---                  | ---                                  | 0.131  | 1.095 | 3.39E-01 | 3.39E+01 |  |  |
| 8070173 | NM_000219                   | KCNE1                | potassium voltage-gated channel,     | 0.094  | 1.068 | 5.47E-01 | 5.47E+01 |  |  |
| 8070182 | NM_004414                   | RCAN1                | regulator of calcineurin 1           | -0.027 | 0.981 | 8.81E-01 | 8.81E+01 |  |  |
| 8070194 | NM_00100189                 | RUNX1                | runt-related transcription factor 1  | -0.101 | 0.932 | 3.37E-01 | 3.37E+01 |  |  |
| 8070215 | NM_017438                   | SETD4                | SET domain containing 4              | -0.036 | 0.976 | 8.84E-01 | 8.84E+01 |  |  |
| 8070233 | NM_144492                   | CLDN14               | claudin 14                           | 0.057  | 1.040 | 5.98E-01 | 5.98E+01 |  |  |
| 8070239 | NM_000411                   | HLCS                 | holocarboxylase synthetase (biotin   | 0.070  | 1.050 | 7.10E-01 | 7.10E+01 |  |  |
| 8070257 | NM_153681                   | PIGP                 | phosphatidylinositol glycan ancho    | 0.059  | 1.042 | 6.95E-01 | 6.95E+01 |  |  |
| 8070269 | NM_006052                   | DSCR3                | Down syndrome critical region ge     | 0.074  | 1.053 | 7.87E-01 | 7.87E+01 |  |  |
| 8070286 | NM_005867                   | DSCR4                | Down syndrome critical region ge     | -0.003 | 0.998 | 9.85E-01 | 9.85E+01 |  |  |
| 8070330 | NM_003720                   | PSMG1                | proteasome (prosome, macropain       | -0.004 | 0.997 | 9.87E-01 | 9.87E+01 |  |  |
| 8070341 | NM_033656                   | BRWD1                | bromodomain and WD repeat dor        | -0.055 | 0.963 | 6.93E-01 | 6.93E+01 |  |  |
| 8070386 | AF426265                    | C21orf87             | chromosome 21 open reading frar      | 0.086  | 1.061 | 7.77E-01 | 7.77E+01 |  |  |
| 8070389 | NM_004965                   | HMGN1                | high-mobility group nucleosome b     | 0.021  | 1.015 | 8.78E-01 | 8.78E+01 |  |  |
| 8070482 | NR_027272                   | C21orf129            | chromosome 21 open reading frar      | -0.063 | 0.958 | 4.86E-01 | 4.86E+01 |  |  |
| 8070489 | NM_020639                   | RIPK4                | receptor-interacting serine-threon   | -0.097 | 0.935 | 2.56E-01 | 2.56E+01 |  |  |
| 8070503 | NM_00104042                 | PRDM15               | PR domain containing 15              | -0.024 | 0.983 | 8.32E-01 | 8.32E+01 |  |  |
| 8070538 | NM_015500                   | C2CD2                | C2 calcium-dependent domain cor      | 0.072  | 1.051 | 6.24E-01 | 6.24E+01 |  |  |
| 8070557 | NM_00109840                 | ZNF295               | zinc finger protein 295              | -0.072 | 0.951 | 6.89E-01 | 6.89E+01 |  |  |
| 8070563 | NR_027243                   | C21orf128            | chromosome 21 open reading frar      | -0.006 | 0.996 | 9.78E-01 | 9.78E+01 |  |  |
| 8070567 | NM_003226                   | TFF3                 | trefoil factor 3 (intestinal)        | 0.058  | 1.041 | 5.55E-01 | 5.55E+01 |  |  |
| 8070579 | NM_003225                   | TFF1                 | trefoil factor 1                     | -0.008 | 0.995 | 9.65E-01 | 9.65E+01 |  |  |
| 8070615 | NM_018669                   | WDR4                 | WD repeat domain 4                   | -0.040 | 0.973 | 7.54E-01 | 7.54E+01 |  |  |
| 8070629 | BC005107                    | C21orf105            | chromosome 21 open reading frar      | -0.007 | 0.995 | 9.82E-01 | 9.82E+01 |  |  |
| 8070632 | NM_000071                   | CBS                  | cystathionine-beta-synthase          | 0.035  | 1.024 | 7.62E-01 | 7.62E+01 |  |  |
| 8070655 | NM_00102520                 | U2AF1                | U2 small nuclear RNA auxiliary fac   | 0.017  | 1.012 | 9.09E-01 | 9.09E+01 |  |  |
| 8070665 | NM_173354                   | SIK1                 | salt-inducible kinase 1              | -0.011 | 0.993 | 9.53E-01 | 9.53E+01 |  |  |
| 8070681 | AF426261                    | C21orf84             | chromosome 21 open reading frar      | -0.001 | 0.999 | 9.95E-01 | 9.95E+01 |  |  |
| 8070689 | NM_007031                   | HSF2BP               | heat shock transcription factor 2 b  | -0.042 | 0.971 | 7.98E-01 | 7.98E+01 |  |  |
| 8070701 | NM_000100                   | CSTB                 | cystatin B (stefin B)                | -0.015 | 0.990 | 9.40E-01 | 9.40E+01 |  |  |
| 8070708 | NR_026961                   | LOC284837            | hypothetical LOC284837               | -0.068 | 0.954 | 5.91E-01 | 5.91E+01 |  |  |
| 8070712 | ---                         | ---                  | ---                                  | 0.105  | 1.075 | 6.31E-01 | 6.31E+01 |  |  |
| 8070716 | ENST00000430                | C21orf32             | chromosome 21 open reading frar      | -0.085 | 0.943 | 4.70E-01 | 4.70E+01 |  |  |
| 8070720 | NM_015259                   | ICOSLG               | inducible T-cell co-stimulator ligan | -0.054 | 0.963 | 6.91E-01 | 6.91E+01 |  |  |
| 8070744 | NM_004928                   | C21orf2              | chromosome 21 open reading frar      | -0.043 | 0.970 | 6.91E-01 | 6.91E+01 |  |  |
| 8070757 | NM_144991                   | C21orf29             | chromosome 21 open reading frar      | -0.025 | 0.983 | 8.73E-01 | 8.73E+01 |  |  |
| 8070771 | NM_198691                   | KRTAP10-1            | keratin associated protein 10-1      | -0.038 | 0.974 | 7.45E-01 | 7.45E+01 |  |  |
| 8070777 | NM_198693                   | KRTAP10-2            | keratin associated protein 10-2      | 0.067  | 1.048 | 5.52E-01 | 5.52E+01 |  |  |
| 8070780 | NM_198696                   | KRTAP10-3            | keratin associated protein 10-3      | -0.118 | 0.922 | 2.21E-01 | 2.21E+01 |  |  |
| 8070782 | NM_198694                   | KRTAP10-5            | keratin associated protein 10-5      | -0.071 | 0.952 | 7.49E-01 | 7.49E+01 |  |  |
| 8070786 | NM_198688                   | KRTAP10-6            | keratin associated protein 10-6      | -0.021 | 0.986 | 8.41E-01 | 8.41E+01 |  |  |
| 8070789 | NM_198698                   | KRTAP12-4            | keratin associated protein 12-4      | 0.015  | 1.011 | 8.99E-01 | 8.99E+01 |  |  |
| 8070791 | NM_181684                   | KRTAP12-2            | keratin associated protein 12-2      | 0.031  | 1.022 | 7.89E-01 | 7.89E+01 |  |  |
| 8070795 | NM_181686                   | //P12-1 // KRTAP12-1 | keratin associated protein 12-1      | 0.090  | 1.064 | 4.81E-01 | 4.81E+01 |  |  |
| 8070799 | NM_182688                   | UBE2G2               | ubiquitin-conjugating enzyme E2G     | 0.036  | 1.025 | 8.21E-01 | 8.21E+01 |  |  |
| 8070811 | NM_006936                   | SUMO3                | SMT3 suppressor of mif two 3 hor     | 0.082  | 1.059 | 4.04E-01 | 4.04E+01 |  |  |
| 8070819 | NM_004339                   | PTTG1IP              | pituitary tumor-transforming 1 int   | 0.176  | 1.130 | 2.61E-01 | 2.61E+01 |  |  |
| 8070847 | NR_027128                   | C21orf67             | chromosome 21 open reading frar      | 0.016  | 1.011 | 9.16E-01 | 9.16E+01 |  |  |
| 8070853 | NR_027129                   | C21orf67             | chromosome 21 open reading frar      | 0.014  | 1.010 | 9.16E-01 | 9.16E+01 |  |  |
| 8070863 | BC004343                    | C21orf122            | chromosome 21 open reading frar      | -0.015 | 0.990 | 9.36E-01 | 9.36E+01 |  |  |
| 8070867 | ENST00000416                | C21orf122            | chromosome 21 open reading frar      | -0.034 | 0.977 | 8.06E-01 | 8.06E+01 |  |  |
| 8070876 | NM_015227                   | POFUT2               | protein O-fucosyltransferase 2       | -0.011 | 0.993 | 9.63E-01 | 9.63E+01 |  |  |
| 8070891 | AF426264                    | C21orf86             | chromosome 21 open reading frar      | -0.001 | 0.999 | 9.97E-01 | 9.97E+01 |  |  |
| 8070896 | AF427488                    | C21orf93             | chromosome 21 open reading frar      | -0.046 | 0.968 | 6.38E-01 | 6.38E+01 |  |  |
| 8070900 | ENST00000418                | C21orf111            | chromosome 21 open reading frar      | -0.003 | 0.998 | 9.89E-01 | 9.89E+01 |  |  |
| 8070912 | NM_194255                   | SLC19A1              | solute carrier family 19 (folate tra | 0.036  | 1.025 | 7.38E-01 | 7.38E+01 |  |  |
| 8070925 | ---                         | ---                  | ---                                  | -0.081 | 0.946 | 4.06E-01 | 4.06E+01 |  |  |
| 8070930 | ---                         | ---                  | ---                                  | -0.065 | 0.956 | 7.08E-01 | 7.08E+01 |  |  |
| 8070933 | NM_006657                   | FTCD                 | formiminotransferase cyclodeamin     | -0.024 | 0.983 | 8.41E-01 | 8.41E+01 |  |  |
| 8070953 | NM_00114285                 | C21orf56             | chromosome 21 open reading frar      | -0.063 | 0.958 | 4.67E-01 | 4.67E+01 |  |  |
| 8070961 | NM_002340                   | LSS                  | lanosterol synthase (2,3-oxidosqu    | -0.052 | 0.964 | 7.14E-01 | 7.14E+01 |  |  |
| 8070988 | NM_003906                   | MCM3AP               | minichromosome maintenance co        | 0.021  | 1.015 | 8.78E-01 | 8.78E+01 |  |  |
| 8071020 | NM_058180                   | C21orf58             | chromosome 21 open reading frar      | -0.029 | 0.980 | 8.18E-01 | 8.18E+01 |  |  |
| 8071036 | NM_006272                   | S100B                | S100 calcium binding protein B       | 0.471  | 1.386 | 3.85E-01 | 3.85E+01 |  |  |
| 8071044 | 0                           | 0                    | 0                                    | -0.069 | 0.953 | 7.85E-01 | 7.85E+01 |  |  |
| 8071049 | 0                           | 0                    | 0                                    | 0.131  | 1.095 | 7.97E-01 | 7.97E+01 |  |  |
| 8071051 | AK126241 // #4253 // FLJ441 |                      | hypothetical gene supported by A     | -0.029 | 0.980 | 9.26E-01 | 9.26E+01 |  |  |
| 8071061 | AK097082                    | psiTPTE22            | TPTE pseudogene                      | -0.010 | 0.993 | 9.75E-01 | 9.75E+01 |  |  |
| 8071069 | NM_014339                   | IL17RA               | interleukin 17 receptor A            | 0.106  | 1.076 | 4.82E-01 | 4.82E+01 |  |  |
| 8071084 | NR_024483                   | CECR4                | cat eye syndrome chromosome re       | 0.064  | 1.045 | 6.00E-01 | 6.00E+01 |  |  |
| 8071086 | NM_031413                   | CECR2                | cat eye syndrome chromosome re       | 0.050  | 1.035 | 6.91E-01 | 6.91E+01 |  |  |

|         |              |            |                                          |        |       |          |          |
|---------|--------------|------------|------------------------------------------|--------|-------|----------|----------|
| 8071107 | NM_031481    | SLC25A18   | solute carrier family 25 (mitochondrion) | 0.004  | 1.003 | 9.86E-01 | 9.86E+01 |
| 8071119 | NM_015367    | BCL2L13    | BCL2-like 13 (apoptosis facilitator)     | -0.003 | 0.998 | 9.88E-01 | 9.88E+01 |
| 8071134 | ENST00000444 | C22orf37   | chromosome 22 open reading frame         | -0.059 | 0.960 | 7.22E-01 | 7.22E+01 |
| 8071136 | NM_00112764  | PEX26      | peroxisomal biogenesis factor 26         | 0.022  | 1.016 | 8.63E-01 | 8.63E+01 |
| 8071147 | NM_018943    | TUBA8      | tubulin, alpha 8                         | -0.090 | 0.940 | 4.73E-01 | 4.73E+01 |
| 8071155 | NM_017414    | USP18      | ubiquitin specific peptidase 18          | 0.074  | 1.052 | 7.85E-01 | 7.85E+01 |
| 8071168 | NR_024593    | POM121L10P | POM121 membrane glycoprotein             | -0.019 | 0.987 | 8.70E-01 | 8.70E+01 |
| 8071170 | NR_024593    | POM121L10P | POM121 membrane glycoprotein             | -0.002 | 0.999 | 9.90E-01 | 9.90E+01 |
| 8071185 | NR_002733    | DGCR5      | DiGeorge syndrome critical region        | -0.045 | 0.970 | 6.37E-01 | 6.37E+01 |
| 8071194 | ---          | ---        | ---                                      | -0.074 | 0.950 | 7.83E-01 | 7.83E+01 |
| 8071206 | NM_003776    | MRPL40     | mitochondrial ribosomal protein L        | 0.020  | 1.014 | 9.35E-01 | 9.35E+01 |
| 8071234 | NM_002688    | 40A26      | septin 5                                 | -0.004 | 0.997 | 9.66E-01 | 9.66E+01 |
| 8071259 | NM_002688    | 40A26      | septin 5                                 | -0.061 | 0.958 | 4.25E-01 | 4.25E+01 |
| 8071268 | NM_000407    | GP1BB      | glycoprotein Ib (platelet), beta pol     | -0.052 | 0.964 | 6.32E-01 | 6.32E+01 |
| 8071272 | L20860       | GP1BB      | glycoprotein Ib (platelet), beta pol     | -0.116 | 0.923 | 2.79E-01 | 2.79E+01 |
| 8071274 | L20860       | GP1BB      | glycoprotein Ib (platelet), beta pol     | -0.066 | 0.956 | 8.03E-01 | 8.03E+01 |
| 8071276 | NM_080647    | TBX1       | T-box 1                                  | -0.047 | 0.968 | 6.04E-01 | 6.04E+01 |
| 8071289 | NM_000754    | COMT       | catechol-O-methyltransferase             | -0.023 | 0.984 | 8.31E-01 | 8.31E+01 |
| 8071301 | NM_152906    | C22orf25   | chromosome 22 open reading frame         | 0.001  | 1.001 | 9.92E-01 | 9.92E+01 |
| 8071312 | ---          | ---        | ---                                      | -0.047 | 0.968 | 6.91E-01 | 6.91E+01 |
| 8071314 | NM_022720    | DGCR8      | DiGeorge syndrome critical region        | -0.018 | 0.988 | 9.12E-01 | 9.12E+01 |
| 8071332 | NM_002882    | RANBP1     | RAN binding protein 1                    | 0.000  | 1.000 | 1.00E+00 | 1.00E+02 |
| 8071339 | NM_013373    | ZDHH8      | zinc finger, DHHC-type containing        | -0.034 | 0.977 | 7.52E-01 | 7.52E+01 |
| 8071355 | NR_026919    | LOC150197  | hypothetical LOC150197                   | 0.023  | 1.016 | 8.83E-01 | 8.83E+01 |
| 8071357 | AB051440     | LOC440792  | proline dehydrogenase (oxidase) 1        | -0.051 | 0.965 | 7.38E-01 | 7.38E+01 |
| 8071368 | NR_026815    | TMEM191A   | transmembrane protein 191A               | 0.007  | 1.005 | 9.81E-01 | 9.81E+01 |
| 8071382 | NM_003426    | ZNF74      | zinc finger protein 74                   | -0.015 | 0.990 | 9.20E-01 | 9.20E+01 |
| 8071390 | ---          | ---        | ---                                      | 0.183  | 1.135 | 5.54E-01 | 5.54E+01 |
| 8071392 | NM_00100389  | MED15      | mediator complex subunit 15              | -0.091 | 0.939 | 3.36E-01 | 3.36E+01 |
| 8071411 | NR_024592    | POM121L4P  | POM121 membrane glycoprotein             | 0.040  | 1.028 | 8.58E-01 | 8.58E+01 |
| 8071414 | NR_026815    | TMEM191A   | transmembrane protein 191A               | -0.019 | 0.987 | 9.44E-01 | 9.44E+01 |
| 8071420 | NM_000185    | SERPIND1   | serpin peptidase inhibitor, clade D      | 0.035  | 1.025 | 9.02E-01 | 9.02E+01 |
| 8071426 | NM_004782    | SNAP29     | synaptosomal-associated protein,         | 0.113  | 1.081 | 3.35E-01 | 3.35E+01 |
| 8071434 | NM_005207    | CRKL       | v-crk sarcoma virus CT10 oncogene        | -0.108 | 0.928 | 1.01E-01 | 1.01E+01 |
| 8071444 | NM_144704    | AIFM3      | apoptosis-inducing factor, mitochondrion | 0.004  | 1.003 | 9.81E-01 | 9.81E+01 |
| 8071466 | NM_006767    | LZTR1      | leucine-zipper-like transcription re     | -0.007 | 0.995 | 9.74E-01 | 9.74E+01 |
| 8071516 | NM_004327    | BCR        | breakpoint cluster region                | -0.048 | 0.967 | 6.81E-01 | 6.81E+01 |
| 8071530 | NR_024591    | POM121L1P  | POM121 membrane glycoprotein             | -0.043 | 0.971 | 8.41E-01 | 8.41E+01 |
| 8071532 | NM_015672    | RIMBP3     | RIMS binding protein 3                   | -0.056 | 0.962 | 6.90E-01 | 6.90E+01 |
| 8071536 | NM_015094    | HIC2       | hypermethylated in cancer 2              | -0.097 | 0.935 | 1.53E-01 | 1.53E+01 |
| 8071541 | NR_026815    | TMEM191A   | transmembrane protein 191A               | 0.055  | 1.039 | 7.45E-01 | 7.45E+01 |
| 8071547 | NM_198157    | UBE2L3     | ubiquitin-conjugating enzyme E2L         | 0.019  | 1.014 | 9.24E-01 | 9.24E+01 |
| 8071554 | NM_152612    | CCDC116    | coiled-coil domain containing 116        | -0.018 | 0.988 | 9.11E-01 | 9.11E+01 |
| 8071559 | NM_022044    | SDF2L1     | stromal cell-derived factor 2-like 1     | 0.193  | 1.143 | 3.34E-03 | 3.34E-01 |
| 8071564 | ---          | ---        | ---                                      | 0.012  | 1.009 | 9.60E-01 | 9.60E+01 |
| 8071566 | NM_014337    | PPIL2      | peptidylprolyl isomerase (cyclophi       | 0.024  | 1.017 | 8.74E-01 | 8.74E+01 |
| 8071593 | ---          | ---        | ---                                      | 0.001  | 1.001 | 9.98E-01 | 9.98E+01 |
| 8071595 | ---          | ---        | ---                                      | 0.089  | 1.063 | 7.50E-01 | 7.50E+01 |
| 8071597 | BC032452     | IGL@       | immunoglobulin lambda locus              | 0.051  | 1.036 | 5.98E-01 | 5.98E+01 |
| 8071642 | ENST00000390 | IGLV6-57   | immunoglobulin lambda variable f         | 0.060  | 1.043 | 7.46E-01 | 7.46E+01 |
| 8071649 | BC043345     | BMS1       | BMS1 homolog, ribosome assemb            | -0.031 | 0.979 | 9.31E-01 | 9.31E+01 |
| 8071655 | ---          | ---        | ---                                      | 0.003  | 1.002 | 9.88E-01 | 9.88E+01 |
| 8071662 | NM_199127    | GGTLC2     | gamma-glutamyltransferase light c        | 0.032  | 1.022 | 9.00E-01 | 9.00E+01 |
| 8071671 | NM_002073    | GNAZ       | guanine nucleotide binding protei        | 0.039  | 1.027 | 6.74E-01 | 6.74E+01 |
| 8071676 | NM_004914    | RAB36      | RAB36, member RAS oncogene fa            | -0.032 | 0.978 | 8.46E-01 | 8.46E+01 |
| 8071691 | NM_004327    | BCR        | breakpoint cluster region                | -0.171 | 0.888 | 6.90E-02 | 6.90E+00 |
| 8071713 | AF174606     | FBXW4P1    | F-box and WD repeat domain cont          | -0.043 | 0.971 | 7.97E-01 | 7.97E+01 |
| 8071717 | NM_153615    | RGL4       | ral guanine nucleotide dissociation      | -0.002 | 0.999 | 9.90E-01 | 9.90E+01 |
| 8071737 | NM_002415    | MIF        | macrophage migration inhibitory f        | 0.023  | 1.016 | 9.10E-01 | 9.10E+01 |
| 8071745 | NM_182520    | C22orf15   | chromosome 22 open reading frame         | -0.012 | 0.992 | 9.50E-01 | 9.50E+01 |
| 8071758 | NM_005940    | MMP11      | matrix metalloproteinase 11 (strom       | -0.019 | 0.987 | 8.77E-01 | 8.77E+01 |
| 8071768 | NM_003073    | SMARCB1    | SWI/SNF related, matrix associated       | 0.021  | 1.015 | 9.27E-01 | 9.27E+01 |
| 8071783 | NM_030807    | SLC2A11    | solute carrier family 2 (facilitated t   | -0.033 | 0.977 | 7.64E-01 | 7.64E+01 |
| 8071804 | ---          | ---        | ---                                      | 0.036  | 1.025 | 8.84E-01 | 8.84E+01 |
| 8071806 | NM_001355    | DDT        | D-dopachrome tautomerase                 | 0.025  | 1.018 | 9.04E-01 | 9.04E+01 |
| 8071809 | NM_000854    | GSTT2      | glutathione S-transferase theta 2        | -0.069 | 0.954 | 4.27E-01 | 4.27E+01 |
| 8071819 | ---          | ---        | ---                                      | -0.099 | 0.933 | 4.46E-01 | 4.46E+01 |
| 8071823 | NM_012295    | CABIN1     | calcineurin binding protein 1            | -0.061 | 0.959 | 4.78E-01 | 4.78E+01 |
| 8071861 | NM_019601    | SUSD2      | sushi domain containing 2                | 0.022  | 1.016 | 8.54E-01 | 8.54E+01 |
| 8071877 | NR_003714    | POM121L9P  | POM121 membrane glycoprotein             | -0.024 | 0.984 | 8.99E-01 | 8.99E+01 |
| 8071881 | NM_015330    | CYTSA      | cytospin A                               | -0.094 | 0.937 | 3.76E-01 | 3.76E+01 |
| 8071899 | NM_000675    | ADORA2A    | adenosine A2a receptor                   | -0.174 | 0.887 | 5.36E-02 | 5.36E+00 |
| 8071920 | NM_004175    | SNRPD3     | small nuclear ribonucleoprotein D        | 0.002  | 1.001 | 9.91E-01 | 9.91E+01 |
| 8071927 | NM_005265    | GGT1       | gamma-glutamyltransferase 1              | -0.067 | 0.955 | 1.82E-01 | 1.82E+01 |
| 8071951 | ---          | ---        | ---                                      | -0.062 | 0.958 | 4.93E-01 | 4.93E+01 |
| 8071981 | NM_00114520  | KIAA1671   | KIAA1671                                 | -0.136 | 0.910 | 8.93E-02 | 8.93E+00 |
| 8071989 | NM_004076    | CRYBB3     | crystallin, beta B3                      | -0.124 | 0.918 | 4.72E-02 | 4.72E+00 |

|         |              |           |                                               |        |       |          |          |  |  |
|---------|--------------|-----------|-----------------------------------------------|--------|-------|----------|----------|--|--|
| 8071997 | NM_000496    | CRYBB2    | crystallin, beta B2                           | -0.040 | 0.972 | 8.06E-01 | 8.06E+01 |  |  |
| 8072004 | NM_00101361  | IGLL3     | immunoglobulin lambda-like polypeptide        | 0.079  | 1.056 | 2.04E-01 | 2.04E+01 |  |  |
| 8072009 | BC047380     | CRYBB2P1  | crystallin, beta B2 pseudogene 1              | 0.054  | 1.038 | 7.23E-01 | 7.23E+01 |  |  |
| 8072039 | NM_032608    | MYO18B    | myosin XVIIIIB                                | 0.001  | 1.001 | 9.94E-01 | 9.94E+01 |  |  |
| 8072108 | NM_020437    | ASPHD2    | aspartate beta-hydroxylase domain             | 0.186  | 1.137 | 1.67E-01 | 1.67E+01 |  |  |
| 8072113 | NM_00101369  | SRRD      | SRR1 domain containing                        | 0.021  | 1.015 | 9.37E-01 | 9.37E+01 |  |  |
| 8072122 | ---          | ---       | ---                                           | 0.009  | 1.006 | 9.61E-01 | 9.61E+01 |  |  |
| 8072124 | NM_001886    | CRYBA4    | crystallin, beta A4                           | -0.067 | 0.955 | 6.34E-01 | 6.34E+01 |  |  |
| 8072133 | NR_026963    | LOC284900 | hypothetical LOC284900                        | -0.020 | 0.986 | 9.18E-01 | 9.18E+01 |  |  |
| 8072143 | NM_172002    | HSCB      | HscB iron-sulfur cluster co-chaperone         | 0.040  | 1.028 | 8.21E-01 | 8.21E+01 |  |  |
| 8072153 | NM_173510    | CCDC117   | coiled-coil domain containing 117             | 0.033  | 1.023 | 7.65E-01 | 7.65E+01 |  |  |
| 8072170 | NM_00103957  | KREMEN1   | kringle containing transmembrane protein      | -0.220 | 0.859 | 1.59E-01 | 1.59E+01 |  |  |
| 8072189 | NM_133455    | EMID1     | EMI domain containing 1                       | -0.008 | 0.994 | 9.64E-01 | 9.64E+01 |  |  |
| 8072206 | NM_005243    | EWSR1     | Ewing sarcoma breakpoint region               | 0.010  | 1.007 | 9.50E-01 | 9.50E+01 |  |  |
| 8072216 | NM_006478    | GAS2L1    | growth arrest-specific 2 like 1               | -0.023 | 0.984 | 8.25E-01 | 8.25E+01 |  |  |
| 8072242 | NM_016418    | NF2       | neurofibromin 2 (merlin)                      | -0.047 | 0.968 | 7.51E-01 | 7.51E+01 |  |  |
| 8072266 | NM_182527    | CABP7     | calcium binding protein 7                     | -0.025 | 0.983 | 9.02E-01 | 9.02E+01 |  |  |
| 8072272 | ---          | ---       | ---                                           | 0.027  | 1.019 | 9.34E-01 | 9.34E+01 |  |  |
| 8072274 | NM_00100368  | UCRC      | ubiquinol-cytochrome c reductase              | 0.068  | 1.049 | 6.35E-01 | 6.35E+01 |  |  |
| 8072279 | NM_153050    | MTMR3     | myotubularin related protein 3                | -0.071 | 0.952 | 5.89E-01 | 5.89E+01 |  |  |
| 8072302 | NM_153050    | MTMR3     | myotubularin related protein 3                | -0.021 | 0.986 | 9.39E-01 | 9.39E+01 |  |  |
| 8072316 | NM_00101743  | CCDC157   | coiled-coil domain containing 157             | -0.019 | 0.987 | 8.95E-01 | 8.95E+01 |  |  |
| 8072328 | NM_012429    | SEC14L2   | SEC14-like 2 (S. cerevisiae)                  | 0.023  | 1.016 | 9.30E-01 | 9.30E+01 |  |  |
| 8072344 | ---          | ---       | ---                                           | -0.060 | 0.959 | 8.66E-01 | 8.66E+01 |  |  |
| 8072346 | NM_016498    | MTP18     | mitochondrial protein 18 kDa                  | -0.047 | 0.968 | 7.38E-01 | 7.38E+01 |  |  |
| 8072353 | AY358802     | UNQ1945   | VLGN1945                                      | 0.067  | 1.048 | 5.78E-01 | 5.78E+01 |  |  |
| 8072374 | NM_00100147  | SLC35E4   | solute carrier family 35, member 4            | -0.037 | 0.974 | 7.93E-01 | 7.93E+01 |  |  |
| 8072382 | NM_030758    | OSBP2     | oxysterol binding protein 2                   | -0.056 | 0.962 | 5.94E-01 | 5.94E+01 |  |  |
| 8072407 | NR_002323    | TUG1      | taurine upregulated 1 (non-protein)           | 0.013  | 1.009 | 9.33E-01 | 9.33E+01 |  |  |
| 8072411 | ---          | ---       | ---                                           | 0.060  | 1.042 | 6.90E-01 | 6.90E+01 |  |  |
| 8072413 | NM_134269    | SMITN     | smoothenin                                    | -0.012 | 0.992 | 9.44E-01 | 9.44E+01 |  |  |
| 8072436 | NM_00100283  | INPP5J    | inositol polyphosphate-5-phosphatase          | -0.001 | 0.999 | 9.96E-01 | 9.96E+01 |  |  |
| 8072454 | NR_024210    | RNF185    | ring finger protein 185                       | 0.069  | 1.049 | 7.27E-01 | 7.27E+01 |  |  |
| 8072461 | NM_016733    | LIMK2     | LIM domain kinase 2                           | -0.300 | 0.812 | 6.06E-02 | 6.06E+00 |  |  |
| 8072484 | ENST00000425 | MGC15705  | hypothetical protein MGC15705                 | 0.066  | 1.047 | 7.63E-01 | 7.63E+01 |  |  |
| 8072488 | NM_004147    | DRG1      | developmentally regulated GTP binding protein | 0.077  | 1.055 | 5.29E-01 | 5.29E+01 |  |  |
| 8072494 | NM_00100746  | SFI1      | Sfi1 homolog, spindle assembly factor         | -0.034 | 0.976 | 7.85E-01 | 7.85E+01 |  |  |
| 8072529 | NM_014662    | DEPDC5    | DEP domain containing 5                       | 0.114  | 1.082 | 1.50E-01 | 1.50E+01 |  |  |
| 8072577 | NM_003405    | YWHAH     | tyrosine 3-monooxygenase/tryptophan           | 0.045  | 1.032 | 8.22E-01 | 8.22E+01 |  |  |
| 8072582 | ---          | ---       | ---                                           | 0.111  | 1.080 | 7.07E-01 | 7.07E+01 |  |  |
| 8072584 | ---          | ---       | ---                                           | -0.075 | 0.949 | 6.16E-01 | 6.16E+01 |  |  |
| 8072610 | NM_012179    | FBXO7     | F-box protein 7                               | 0.081  | 1.057 | 3.67E-01 | 3.67E+01 |  |  |
| 8072626 | NM_000362    | TIMP3     | TIMP metalloproteinase inhibitor 3            | 0.021  | 1.014 | 9.02E-01 | 9.02E+01 |  |  |
| 8072636 | NM_00100849  | ISX       | intestine-specific homeobox                   | -0.032 | 0.978 | 7.57E-01 | 7.57E+01 |  |  |
| 8072645 | NR_027780    | HMGXB4    | HMG box domain containing 4                   | -0.066 | 0.955 | 5.59E-01 | 5.59E+01 |  |  |
| 8072659 | NR_024194    | TOM1      | target of myb1 (chicken)                      | -0.140 | 0.908 | 3.63E-01 | 3.63E+01 |  |  |
| 8072678 | NM_002133    | HMOX1     | heme oxygenase (decycling) 1                  | 0.425  | 1.342 | 8.96E-02 | 8.96E+00 |  |  |
| 8072687 | NM_006739    | MCM5      | minichromosome maintenance complex            | -0.051 | 0.965 | 8.40E-01 | 8.40E+01 |  |  |
| 8072705 | NM_014310    | RASD2     | RASD family, member 2                         | -0.081 | 0.945 | 3.36E-01 | 3.36E+01 |  |  |
| 8072710 | NM_030641    | APOL6     | apolipoprotein L, 6                           | 0.257  | 1.195 | 1.09E-01 | 1.09E+01 |  |  |
| 8072729 | ---          | ---       | ---                                           | 0.119  | 1.086 | 6.51E-01 | 6.51E+01 |  |  |
| 8072735 | NM_145343    | APOL1     | apolipoprotein L, 1                           | 0.236  | 1.178 | 4.14E-01 | 4.14E+01 |  |  |
| 8072757 | NM_000395    | CSF2RB    | colony stimulating factor 2 receptor          | 0.230  | 1.173 | 3.85E-01 | 3.85E+01 |  |  |
| 8072777 | NR_024038    | MPST      | mercaptopurinate sulfurtransferase            | -0.018 | 0.987 | 8.90E-01 | 8.90E+01 |  |  |
| 8072784 | NM_024681    | KCTD17    | potassium channel tetramerisation             | -0.036 | 0.975 | 7.41E-01 | 7.41E+01 |  |  |
| 8072796 | NM_153609    | TMPPRSS6  | transmembrane protease, serine 6              | -0.022 | 0.985 | 9.24E-01 | 9.24E+01 |  |  |
| 8072798 | NM_013385    | CYTH4     | cytohesin 4                                   | 0.085  | 1.060 | 6.85E-01 | 6.85E+01 |  |  |
| 8072817 | NM_152243    | CDC42EP1  | CDC42 effector protein (Rho GTPase)           | -0.039 | 0.973 | 7.27E-01 | 7.27E+01 |  |  |
| 8072825 | NM_013365    | GGA1      | golgi associated, gamma adaptin 1             | 0.142  | 1.104 | 6.71E-02 | 6.71E+00 |  |  |
| 8072847 | NM_018957    | SH3BP1    | SH3-domain binding protein 1                  | -0.022 | 0.985 | 8.78E-01 | 8.78E+01 |  |  |
| 8072870 | NM_020315    | PDXP      | pyridoxal (pyridoxine, vitamin B6)            | 0.018  | 1.013 | 9.07E-01 | 9.07E+01 |  |  |
| 8072876 | NM_002305    | LGALS1    | lectin, galactoside-binding, soluble          | 0.111  | 1.080 | 6.48E-01 | 6.48E+01 |  |  |
| 8072883 | NM_024313    | NOL12     | nucleolar protein 12                          | 0.019  | 1.013 | 9.13E-01 | 9.13E+01 |  |  |
| 8072894 | NM_00103914  | TRIOBP    | TRIO and F-actin binding protein              | -0.027 | 0.982 | 8.32E-01 | 8.32E+01 |  |  |
| 8072926 | NM_005318    | H1FO      | H1 histone family, member 0                   | -0.143 | 0.906 | 4.13E-01 | 4.13E+01 |  |  |
| 8072931 | NM_014291    | GCAT      | glycine C-acetyltransferase (2-amino)         | 0.078  | 1.056 | 6.23E-01 | 6.23E+01 |  |  |
| 8072941 | NM_003614    | GALR3     | galanin receptor 3                            | -0.085 | 0.943 | 3.62E-01 | 3.62E+01 |  |  |
| 8072946 | NM_016091    | EIF3L     | eukaryotic translation initiation factor      | 0.010  | 1.007 | 9.74E-01 | 9.74E+01 |  |  |
| 8072962 | NM_033386    | MICAL1    | MICAL-like 1                                  | -0.053 | 0.964 | 4.78E-01 | 4.78E+01 |  |  |
| 8072979 | NM_021974    | POLR2F    | polymerase (RNA) II (DNA directed)            | -0.083 | 0.944 | 5.39E-01 | 5.39E+01 |  |  |
| 8072989 | NM_012407    | PICK1     | protein interacting with PRKCA 1              | -0.014 | 0.991 | 9.29E-01 | 9.29E+01 |  |  |
| 8073007 | NM_012323    | MAFF      | v-maf musculoaponeurotic fibrosarcoma         | -0.147 | 0.903 | 1.69E-01 | 1.69E+01 |  |  |
| 8073013 | ---          | ---       | ---                                           | 0.003  | 1.002 | 9.92E-01 | 9.92E+01 |  |  |
| 8073015 | NM_006855    | KDEL3     | KDEL (Lys-Asp-Glu-Leu) endoplasmic            | -0.043 | 0.971 | 8.69E-01 | 8.69E+01 |  |  |
| 8073022 | NM_00100288  | CBY1      | chubby homolog 1 (Drosophila)                 | -0.120 | 0.920 | 3.64E-01 | 3.64E+01 |  |  |
| 8073032 | NM_020243    | TOMM22    | translocase of outer mitochondria             | -0.051 | 0.965 | 8.20E-01 | 8.20E+01 |  |  |
| 8073039 | NM_004286    | GTPBP1    | GTP binding protein 1                         | -0.081 | 0.945 | 4.70E-01 | 4.70E+01 |  |  |



|         |             |              |                                      |        |       |          |          |  |  |
|---------|-------------|--------------|--------------------------------------|--------|-------|----------|----------|--|--|
| 8073062 | NM_004900   | APOBEC3B     | apolipoprotein B mRNA editing en     | 0.214  | 1.160 | 1.14E-01 | 1.14E+01 |  |  |
| 8073068 | NM_014508   | APOBEC3C     | apolipoprotein B mRNA editing en     | 0.036  | 1.025 | 9.16E-01 | 9.16E+01 |  |  |
| 8073072 | NM_152426   | APOBEC3D     | apolipoprotein B mRNA editing en     | 0.052  | 1.037 | 7.78E-01 | 7.78E+01 |  |  |
| 8073081 | NM_145298   | APOBEC3F     | apolipoprotein B mRNA editing en     | -0.073 | 0.950 | 8.00E-01 | 8.00E+01 |  |  |
| 8073088 | NM_021822   | APOBEC3G     | apolipoprotein B mRNA editing en     | -0.218 | 0.860 | 4.14E-01 | 4.14E+01 |  |  |
| 8073096 | NM_181773   | APOBEC3H     | apolipoprotein B mRNA editing en     | -0.197 | 0.873 | 5.02E-01 | 5.02E+01 |  |  |
| 8073114 | NM_006116   | MAP3K7IP1    | mitogen-activated protein kinase     | -0.066 | 0.955 | 3.75E-01 | 3.75E+01 |  |  |
| 8073129 | NM_002409   | MGAT3        | mannosyl (beta-1,4-)-glycoprotein    | -0.007 | 0.995 | 9.66E-01 | 9.66E+01 |  |  |
| 8073135 | NM_019008   | SMCR7L       | Smith-Magenis syndrome chromo        | -0.059 | 0.960 | 5.97E-01 | 5.97E+01 |  |  |
| 8073148 | NM_001675   | ATF4         | activating transcription factor 4 (t | -0.140 | 0.907 | 8.90E-02 | 8.90E+00 |  |  |
| 8073152 | NM_021096   | CACNA1I      | calcium channel, voltage-depende     | -0.010 | 0.993 | 9.44E-01 | 9.44E+01 |  |  |
| 8073192 | NM_006003   | UQCRCF51     | ubiquinol-cytochrome c reductase     | 0.093  | 1.067 | 5.78E-01 | 5.78E+01 |  |  |
| 8073194 | NM_004810   | GRAP2        | GRB2-related adaptor protein 2       | -0.174 | 0.886 | 1.83E-01 | 1.83E+01 |  |  |
| 8073207 | NM_138435   | FAM83F       | family with sequence similarity 83   | -0.002 | 0.999 | 9.95E-01 | 9.95E+01 |  |  |
| 8073214 | NM_00102484 | TNRC6B       | trinucleotide repeat containing 6B   | -0.075 | 0.949 | 4.06E-01 | 4.06E+01 |  |  |
| 8073242 | NM_000026   | ADSL         | adenylosuccinate lyase               | 0.045  | 1.032 | 7.88E-01 | 7.88E+01 |  |  |
| 8073259 | NM_015705   | SGSM3        | small G protein signaling modulat    | -0.007 | 0.995 | 9.70E-01 | 9.70E+01 |  |  |
| 8073293 | ---         | ---          | ---                                  | 0.067  | 1.047 | 5.94E-01 | 5.94E+01 |  |  |
| 8073296 | NM_005297   | MCHR1        | melanin-concentrating hormone r      | -0.053 | 0.964 | 6.66E-01 | 6.66E+01 |  |  |
| 8073309 | ---         | ---          | ---                                  | 0.114  | 1.082 | 2.70E-01 | 2.70E+01 |  |  |
| 8073311 | NM_022098   | XPNPEP3      | X-prolyl aminopeptidase (aminope     | 0.032  | 1.023 | 8.52E-01 | 8.52E+01 |  |  |
| 8073334 | NM_014248   | RBX1         | ring-box 1                           | 0.094  | 1.067 | 4.46E-01 | 4.46E+01 |  |  |
| 8073343 | ---         | ---          | ---                                  | 0.000  | 1.000 | 1.00E+00 | 1.00E+02 |  |  |
| 8073345 | NM_001429   | EP300        | E1A binding protein p300             | -0.008 | 0.995 | 9.55E-01 | 9.55E+01 |  |  |
| 8073379 | NM_031488   | L3MBTL2      | l(3)mbt-like 2 (Drosophila)          | -0.025 | 0.983 | 9.00E-01 | 9.00E+01 |  |  |
| 8073397 | NM_017590   | ZC3H7B       | zinc finger CCH-type containing 7    | 0.012  | 1.008 | 9.37E-01 | 9.37E+01 |  |  |
| 8073422 | NM_003216   | TEF          | thyrotrophic embryonic factor        | -0.049 | 0.966 | 6.40E-01 | 6.40E+01 |  |  |
| 8073430 | NM_001098   | ACO2         | aconitase 2, mitochondrial           | -0.004 | 0.998 | 9.86E-01 | 9.86E+01 |  |  |
| 8073449 | NM_014460   | CSDC2        | cold shock domain containing C2,     | 0.021  | 1.014 | 8.56E-01 | 8.56E+01 |  |  |
| 8073457 | NM_001469   | XRCC6        | X-ray repair complementing defec     | -0.015 | 0.990 | 9.23E-01 | 9.23E+01 |  |  |
| 8073470 | NM_00114296 | CTA-216E10.6 | hypothetical FUJ23584                | -0.034 | 0.977 | 8.11E-01 | 8.11E+01 |  |  |
| 8073511 | ---         | ---          | ---                                  | 0.014  | 1.010 | 9.53E-01 | 9.53E+01 |  |  |
| 8073513 | NM_024821   | CCDC134      | coiled-coil domain containing 134    | -0.100 | 0.933 | 2.48E-01 | 2.48E+01 |  |  |
| 8073522 | NM_004599   | SREBF2       | sterol regulatory element binding    | -0.016 | 0.989 | 9.37E-01 | 9.37E+01 |  |  |
| 8073546 | NR_024355   | LOC339674    | hypothetical LOC339674               | -0.021 | 0.985 | 9.06E-01 | 9.06E+01 |  |  |
| 8073573 | NM_00100203 | FAM109B      | family with sequence similarity 10   | -0.013 | 0.991 | 9.49E-01 | 9.49E+01 |  |  |
| 8073578 | BC024237    | C22orf32     | chromosome 22 open reading fram      | 0.044  | 1.031 | 8.79E-01 | 8.79E+01 |  |  |
| 8073582 | BC039496    | LOC388906    | hypothetical protein LOC388906       | -0.038 | 0.974 | 7.58E-01 | 7.58E+01 |  |  |
| 8073585 | NR_027786   | SERHL        | serine hydrolase-like                | -0.018 | 0.988 | 9.10E-01 | 9.10E+01 |  |  |
| 8073603 | J04119      | RNU12P       | RNA, U12 small nuclear pseudoge      | -0.276 | 0.826 | 2.62E-02 | 2.62E+00 |  |  |
| 8073612 | NM_000714   | TSPO         | translocator protein (18kDa)         | 0.048  | 1.034 | 6.52E-01 | 6.52E+01 |  |  |
| 8073623 | NM_00104437 | MPPED1       | metallophosphoesterase domain c      | -0.048 | 0.967 | 7.25E-01 | 7.25E+01 |  |  |
| 8073645 | NM_015380   | SAMM50       | sorting and assembly machinery c     | -0.029 | 0.980 | 8.84E-01 | 8.84E+01 |  |  |
| 8073662 | NM_00100382 | PARVB        | parvin, beta                         | 0.054  | 1.038 | 6.06E-01 | 6.06E+01 |  |  |
| 8073682 | NM_022141   | PARVG        | parvin, gamma                        | 0.221  | 1.165 | 2.30E-02 | 2.30E+00 |  |  |
| 8073698 | NM_00101298 | RP3-474I12.5 | hypothetical LOC388910               | 0.000  | 1.000 | 9.99E-01 | 9.99E+01 |  |  |
| 8073705 | NM_181333   | PRR5         | proline rich 5 (renal)               | 0.008  | 1.005 | 9.53E-01 | 9.53E+01 |  |  |
| 8073733 | NM_153645   | NUP50        | nucleoporin 50kDa                    | 0.027  | 1.019 | 9.12E-01 | 9.12E+01 |  |  |
| 8073743 | NM_006953   | UPK3A        | uroplakin 3A                         | 0.013  | 1.009 | 9.49E-01 | 9.49E+01 |  |  |
| 8073752 | NM_00110459 | FAM118A      | family with sequence similarity 11   | -0.098 | 0.934 | 6.71E-01 | 6.71E+01 |  |  |
| 8073775 | NM_006486   | FBLN1        | fibulin 1                            | 0.102  | 1.073 | 2.01E-01 | 2.01E+01 |  |  |
| 8073799 | NM_013236   | ATXN10       | ataxin 10                            | -0.010 | 0.993 | 9.65E-01 | 9.65E+01 |  |  |
| 8073816 | NR_027033   | LOC400931    | hypothetical LOC400931               | -0.025 | 0.983 | 8.75E-01 | 8.75E+01 |  |  |
| 8073824 | ---         | ---          | ---                                  | -0.066 | 0.955 | 6.92E-01 | 6.92E+01 |  |  |
| 8073826 | NM_005036   | PPARA        | peroxisome proliferator-activated    | -0.036 | 0.975 | 7.56E-01 | 7.56E+01 |  |  |
| 8073842 | NM_017931   | TTC38        | tetratricopeptide repeat domain 3    | 0.105  | 1.076 | 1.38E-01 | 1.38E+01 |  |  |
| 8073875 | NM_018006   | TRMU         | tRNA 5-methylaminomethyl-2-thio      | -0.034 | 0.977 | 8.26E-01 | 8.26E+01 |  |  |
| 8073890 | NM_015124   | GRAMD4       | GRAM domain containing 4             | 0.081  | 1.058 | 5.09E-01 | 5.09E+01 |  |  |
| 8073909 | NM_014346   | TBC1D22A     | TBC1 domain family, member 22A       | -0.046 | 0.969 | 6.91E-01 | 6.91E+01 |  |  |
| 8073924 | uc003bil.1  | LOC388915    | hypothetical LOC388915               | -0.001 | 0.999 | 9.94E-01 | 9.94E+01 |  |  |
| 8073929 | NM_015381   | FAM19A5      | family with sequence similarity 19   | -0.006 | 0.996 | 9.64E-01 | 9.64E+01 |  |  |
| 8073941 | ---         | ---          | ---                                  | -0.019 | 0.987 | 9.00E-01 | 9.00E+01 |  |  |
| 8073943 | NM_014838   | ZBED4        | zinc finger, BED-type containing 4   | 0.012  | 1.008 | 9.60E-01 | 9.60E+01 |  |  |
| 8073949 | NM_00113510 | CRELD2       | cysteine-rich with EGF-like domain   | 0.124  | 1.089 | 2.15E-01 | 2.15E+01 |  |  |
| 8073960 | NM_00100185 | PIM3         | pim-3 oncogene                       | -0.018 | 0.988 | 9.01E-01 | 9.01E+01 |  |  |
| 8073992 | NM_052839   | PANX2        | pannexin 2                           | -0.045 | 0.970 | 6.84E-01 | 6.84E+01 |  |  |
| 8074003 | NM_025204   | TRABD        | TraB domain containing               | -0.037 | 0.975 | 6.92E-01 | 6.92E+01 |  |  |
| 8074020 | NM_031454   | RP3-402G11.5 | selenoprotein O                      | -0.058 | 0.960 | 5.46E-01 | 5.46E+01 |  |  |
| 8074030 | NM_014678   | SAPS2        | SAPS domain family, member 2         | 0.004  | 1.003 | 9.81E-01 | 9.81E+01 |  |  |
| 8074057 | ---         | ---          | ---                                  | -0.076 | 0.949 | 6.93E-01 | 6.93E+01 |  |  |
| 8074061 | ---         | ---          | ---                                  | -0.067 | 0.954 | 5.15E-01 | 5.15E+01 |  |  |
| 8074063 | NM_024866   | ADM2         | adrenomedullin 2                     | -0.041 | 0.972 | 6.93E-01 | 6.93E+01 |  |  |
| 8074070 | NM_017584   | MIOX         | myo-inositol oxygenase               | 0.021  | 1.015 | 9.03E-01 | 9.03E+01 |  |  |
| 8074082 | NM_152299   | NCAPH2       | non-SMC condensin II complex, su     | 0.045  | 1.032 | 6.99E-01 | 6.99E+01 |  |  |
| 8074106 | NM_138433   | KLHDC7B      | kelch domain containing 7B           | 0.025  | 1.017 | 8.46E-01 | 8.46E+01 |  |  |
| 8074108 | NM_012324   | MAPK8IP2     | mitogen-activated protein kinase     | -0.090 | 0.939 | 1.29E-01 | 1.29E+01 |  |  |
| 8074131 | NM_00108042 | SHANK3       | SH3 and multiple ankyrin repeat d    | -0.040 | 0.972 | 6.02E-01 | 6.02E+01 |  |  |

|         |                |               |                                       |        |       |          |          |  |  |
|---------|----------------|---------------|---------------------------------------|--------|-------|----------|----------|--|--|
| 8074153 | NM_001097      | ACR           | acrosin                               | 0.022  | 1.015 | 9.09E-01 | 9.09E+01 |  |  |
| 8074157 | NR_026982      | RPL23AP82     | ribosomal protein L23a pseudogen      | -0.004 | 0.997 | 9.79E-01 | 9.79E+01 |  |  |
| 8074168 | ENST00000400   | FLJ39632      | hypothetical LOC642477                | 0.036  | 1.025 | 7.94E-01 | 7.94E+01 |  |  |
| 8074192 | ---            | ---           | ---                                   | -0.079 | 0.947 | 6.54E-01 | 6.54E+01 |  |  |
| 8074196 | NM_014406      | CCT8L2        | chaperonin containing TCP1, subu      | -0.030 | 0.979 | 7.95E-01 | 7.95E+01 |  |  |
| 8074212 | NM_00103781    | GAB4          | GRB2-associated binding protein f     | -0.026 | 0.982 | 8.06E-01 | 8.06E+01 |  |  |
| 8074223 | NM_031890      | CECR6         | cat eye syndrome chromosome re        | -0.048 | 0.967 | 5.91E-01 | 5.91E+01 |  |  |
| 8074227 | NM_033070      | CECR5         | cat eye syndrome chromosome re        | 0.010  | 1.007 | 9.63E-01 | 9.63E+01 |  |  |
| 8074251 | NM_001696      | ATP6V1E1      | ATPase, H+ transporting, lysosoma     | -0.029 | 0.980 | 9.09E-01 | 9.09E+01 |  |  |
| 8074261 | NM_197966      | BID           | BH3 interacting domain death ago      | 0.005  | 1.004 | 9.76E-01 | 9.76E+01 |  |  |
| 8074274 | NM_015241      | MICAL3        | microtubule associated monoxyme       | -0.028 | 0.981 | 8.45E-01 | 8.45E+01 |  |  |
| 8074286 | NM_015241      | MICAL3        | microtubule associated monoxyme       | -0.022 | 0.985 | 9.42E-01 | 9.42E+01 |  |  |
| 8074307 | AK094477       | LOC100129113  | hypothetical protein LOC1001291       | -0.082 | 0.945 | 4.36E-01 | 4.36E+01 |  |  |
| 8074316 | NR_003267      | GGT3P         | gamma-glutamyltransferase 3 pse       | -0.065 | 0.956 | 2.41E-01 | 2.41E+01 |  |  |
| 8074349 | NM_005137      | DGCR2         | DiGeorge syndrome critical region     | 0.039  | 1.027 | 7.51E-01 | 7.51E+01 |  |  |
| 8074371 | NM_022719      | DGCR14        | DiGeorge syndrome critical region     | -0.035 | 0.976 | 7.57E-01 | 7.57E+01 |  |  |
| 8074384 | NM_005315      | GSC2          | goosecoid homeobox 2                  | -0.071 | 0.952 | 5.51E-01 | 5.51E+01 |  |  |
| 8074388 | NM_005984      | SLC25A1       | solute carrier family 25 (mitochon    | -0.037 | 0.974 | 7.39E-01 | 7.39E+01 |  |  |
| 8074399 | NM_007098      | CLTCL1        | clathrin, heavy chain-like 1          | 0.006  | 1.004 | 9.67E-01 | 9.67E+01 |  |  |
| 8074432 | NM_003325      | HIRA          | HIR histone cell cycle regulation d   | -0.005 | 0.997 | 9.81E-01 | 9.81E+01 |  |  |
| 8074458 | BC062599       | C22orf39      | chromosome 22 open reading fram       | 0.026  | 1.018 | 8.73E-01 | 8.73E+01 |  |  |
| 8074464 | NM_005659      | UFD1L         | ubiquitin fusion degradation 1 like   | -0.076 | 0.949 | 6.66E-01 | 6.66E+01 |  |  |
| 8074473 | NM_00113086    | CLDN5         | claudin 5                             | -0.018 | 0.988 | 8.72E-01 | 8.72E+01 |  |  |
| 8074481 | NM_053004      | GNB1L         | guanine nucleotide binding protei     | -0.053 | 0.964 | 5.86E-01 | 5.86E+01 |  |  |
| 8074498 | NM_006440      | TXNRD2        | thioredoxin reductase 2               | -0.029 | 0.980 | 8.06E-01 | 8.06E+01 |  |  |
| 8074522 | NM_001670      | ARVCF         | armadillo repeat gene deletes in v    | 0.079  | 1.056 | 4.42E-01 | 4.42E+01 |  |  |
| 8074541 | NM_022727      | TRMT2A        | TRM2 tRNA methyltransferase 2 h       | -0.008 | 0.994 | 9.53E-01 | 9.53E+01 |  |  |
| 8074558 | NM_023004      | RTN4R         | reticulon 4 receptor                  | -0.075 | 0.949 | 2.88E-01 | 2.88E+01 |  |  |
| 8074565 | NM_033257      | DGCR6L        | DiGeorge syndrome critical region     | -0.043 | 0.971 | 8.04E-01 | 8.04E+01 |  |  |
| 8074569 | NR_003267 // p | // GGT3P // C | gamma-glutamyltransferase 3 pse       | -0.053 | 0.964 | 4.10E-01 | 4.10E+01 |  |  |
| 8074577 | NR_003700      | PI4KAP2       | phosphatidylinositol 4-kinase, cata   | -0.024 | 0.984 | 9.24E-01 | 9.24E+01 |  |  |
| 8074593 | NM_015672      | RIMBP3        | RIMS binding protein 3                | -0.012 | 0.992 | 9.49E-01 | 9.49E+01 |  |  |
| 8074606 | NM_017414      | USP18         | ubiquitin specific peptidase 18       | 0.091  | 1.065 | 8.53E-01 | 8.53E+01 |  |  |
| 8074615 | ---            | ---           | ---                                   | -0.003 | 0.998 | 9.86E-01 | 9.86E+01 |  |  |
| 8074617 | NM_153334      | SCARF2        | scavenger receptor class F, membe     | -0.016 | 0.989 | 9.16E-01 | 9.16E+01 |  |  |
| 8074632 | NM_032775      | KLHL22        | kelch-like 22 (Drosophila)            | 0.063  | 1.044 | 5.23E-01 | 5.23E+01 |  |  |
| 8074640 | ---            | ---           | ---                                   | 0.072  | 1.052 | 8.32E-01 | 8.32E+01 |  |  |
| 8074642 | ---            | ---           | ---                                   | 0.045  | 1.031 | 9.22E-01 | 9.22E+01 |  |  |
| 8074644 | ---            | ---           | ---                                   | -0.054 | 0.963 | 7.42E-01 | 7.42E+01 |  |  |
| 8074647 | NM_058004      | PI4KA         | phosphatidylinositol 4-kinase, cata   | 0.020  | 1.014 | 9.10E-01 | 9.10E+01 |  |  |
| 8074688 | NM_030573      | THAP7         | THAP domain containing 7              | 0.008  | 1.006 | 9.72E-01 | 9.72E+01 |  |  |
| 8074695 | NR_003608      | MGC16703      | tubulin, alpha pseudogene             | -0.006 | 0.996 | 9.81E-01 | 9.81E+01 |  |  |
| 8074701 | NM_004173      | SLC7A4        | solute carrier family 7 (cationic am  | -0.016 | 0.989 | 9.05E-01 | 9.05E+01 |  |  |
| 8074712 | NR_024591      | POM121L1P     | POM121 membrane glycoprotein-         | -0.043 | 0.971 | 8.41E-01 | 8.41E+01 |  |  |
| 8074714 | NR_024591      | POM121L1P     | POM121 membrane glycoprotein-         | -0.012 | 0.992 | 9.53E-01 | 9.53E+01 |  |  |
| 8074716 | NR_003267      | GGT3P         | gamma-glutamyltransferase 3 pse       | -0.059 | 0.960 | 2.64E-01 | 2.64E+01 |  |  |
| 8074748 | NR_003700      | PI4KAP2       | phosphatidylinositol 4-kinase, cata   | -0.007 | 0.995 | 9.82E-01 | 9.82E+01 |  |  |
| 8074771 | NM_015672      | RIMBP3        | RIMS binding protein 3                | 0.007  | 1.005 | 9.68E-01 | 9.68E+01 |  |  |
| 8074773 | NM_00101796    | YDJC          | YdjC homolog (bacterial)              | -0.071 | 0.952 | 4.25E-01 | 4.25E+01 |  |  |
| 8074780 | NM_013313      | YPEL1         | yippee-like 1 (Drosophila)            | -0.018 | 0.988 | 9.62E-01 | 9.62E+01 |  |  |
| 8074791 | NM_002745      | MAPK1         | mitogen-activated protein kinase      | -0.012 | 0.992 | 9.53E-01 | 9.53E+01 |  |  |
| 8074806 | NM_014634      | PPM1F         | protein phosphatase 1F (PP2C dor      | -0.066 | 0.955 | 6.16E-01 | 6.16E+01 |  |  |
| 8074817 | NM_003935      | TOP3B         | topoisomerase (DNA) III beta          | 0.041  | 1.029 | 8.33E-01 | 8.33E+01 |  |  |
| 8074842 | NM_00113011    | FAM108A1      | family with sequence similarity 10    | 0.011  | 1.007 | 9.38E-01 | 9.38E+01 |  |  |
| 8074845 | NM_080764      | ZNF280B       | zinc finger protein 280B              | -0.100 | 0.933 | 4.32E-01 | 4.32E+01 |  |  |
| 8074867 | NR_024591      | POM121L1P     | POM121 membrane glycoprotein-         | -0.032 | 0.978 | 7.63E-01 | 7.63E+01 |  |  |
| 8074878 | ---            | ---           | ---                                   | 0.019  | 1.013 | 9.16E-01 | 9.16E+01 |  |  |
| 8074880 | NM_004914      | RAB36         | RAB36, member RAS oncogene fam        | -0.010 | 0.993 | 9.61E-01 | 9.61E+01 |  |  |
| 8074888 | ---            | ---           | ---                                   | -0.028 | 0.981 | 8.46E-01 | 8.46E+01 |  |  |
| 8074890 | ---            | ---           | ---                                   | -0.023 | 0.984 | 9.46E-01 | 9.46E+01 |  |  |
| 8074892 | NR_003950      | ZDHC8P        | zinc finger, DHHC-type containing     | -0.020 | 0.986 | 9.14E-01 | 9.14E+01 |  |  |
| 8074909 | NM_020070      | IGLL1         | immunoglobulin lambda-like polyg      | 0.004  | 1.003 | 9.79E-01 | 9.79E+01 |  |  |
| 8074925 | NR_024448      | LOC91316      | glucuronidase, beta/ immunoglob       | 0.017  | 1.012 | 9.63E-01 | 9.63E+01 |  |  |
| 8074927 | NR_024448      | LOC91316      | glucuronidase, beta/ immunoglob       | -0.006 | 0.996 | 9.85E-01 | 9.85E+01 |  |  |
| 8074931 | NM_021916      | ZNF70         | zinc finger protein 70                | 0.039  | 1.027 | 7.94E-01 | 7.94E+01 |  |  |
| 8074934 | NM_013378      | VPREB3        | pre-B lymphocyte 3                    | 0.079  | 1.056 | 4.06E-01 | 4.06E+01 |  |  |
| 8074939 | NM_213720      | CHCHD10       | coiled-coil-helix-coiled-coil-helix d | 0.016  | 1.011 | 9.35E-01 | 9.35E+01 |  |  |
| 8074944 | NM_198440      | DERL3         | Der1-like domain family, member       | -0.028 | 0.981 | 8.13E-01 | 8.13E+01 |  |  |
| 8074962 | NM_000854      | GSTT2         | glutathione S-transferase theta 2     | -0.069 | 0.954 | 4.27E-01 | 4.27E+01 |  |  |
| 8074969 | NM_001355      | DDT           | D-dopachrome tautomerase              | 0.036  | 1.025 | 9.24E-01 | 9.24E+01 |  |  |
| 8074980 | NM_000853      | GSTT1         | glutathione S-transferase theta 1     | -0.017 | 0.988 | 9.44E-01 | 9.44E+01 |  |  |
| 8074991 | NM_00109978    | GGT5          | gamma-glutamyltransferase 5           | -0.034 | 0.977 | 7.90E-01 | 7.90E+01 |  |  |
| 8075005 | AK289871       | ADORA2A       | adenosine A2a receptor                | -0.025 | 0.983 | 8.48E-01 | 8.48E+01 |  |  |
| 8075009 | NM_031444      | C22orf13      | chromosome 22 open reading fram       | 0.003  | 1.002 | 9.87E-01 | 9.87E+01 |  |  |
| 8075016 | NM_207644      | C22orf36      | chromosome 22 open reading fram       | 0.025  | 1.018 | 8.06E-01 | 8.06E+01 |  |  |
| 8075024 | NR_024593      | POM121L10P    | POM121 membrane glycoprotein-         | -0.007 | 0.995 | 9.70E-01 | 9.70E+01 |  |  |
| 8075052 | NM_182492      | LRP5L         | low density lipoprotein receptor-r    | 0.064  | 1.045 | 5.25E-01 | 5.25E+01 |  |  |

|         |               |           |                                      |        |       |          |          |  |
|---------|---------------|-----------|--------------------------------------|--------|-------|----------|----------|--|
| 8075063 | NM_022081     | HPS4      | Hermansky-Pudlak syndrome 4          | -0.037 | 0.975 | 8.22E-01 | 8.22E+01 |  |
| 8075089 | NM_00100869   | TFIP11    | tuftelin interacting protein 11      | -0.137 | 0.910 | 1.72E-01 | 1.72E+01 |  |
| 8075106 | NM_003595     | TPST2     | tyrosylprotein sulfotransferase 2    | 0.143  | 1.104 | 3.50E-02 | 3.50E+00 |  |
| 8075118 | NM_001887     | CRYBB1    | crystallin, beta B1                  | -0.015 | 0.990 | 9.09E-01 | 9.09E+01 |  |
| 8075126 | NM_002430     | MN1       | meningioma (disrupted in balance     | -0.081 | 0.946 | 1.69E-01 | 1.69E+01 |  |
| 8075130 | NM_012399     | PITPNB    | phosphatidylinositol transfer prot   | 0.017  | 1.012 | 8.97E-01 | 8.97E+01 |  |
| 8075160 | ---           | ---       | ---                                  | 0.002  | 1.001 | 9.94E-01 | 9.94E+01 |  |
| 8075182 | NM_005080     | XBP1      | X-box binding protein 1              | 0.037  | 1.026 | 8.07E-01 | 8.07E+01 |  |
| 8075200 | NM_012265     | RHBDD3    | rhomboid domain containing 3         | 0.008  | 1.005 | 9.65E-01 | 9.65E+01 |  |
| 8075211 | NM_00100727   | RASL10A   | RAS-like, family 10, member A        | -0.049 | 0.966 | 7.43E-01 | 7.43E+01 |  |
| 8075217 | NM_001127     | AP1B1     | adaptor-related protein complex 1    | 0.143  | 1.104 | 1.39E-01 | 1.39E+01 |  |
| 8075239 | NM_00100287   | THOC5     | THO complex 5                        | -0.009 | 0.994 | 9.72E-01 | 9.72E+01 |  |
| 8075263 | NM_003634     | NIPSNAP1  | nipsnap homolog 1 (C. elegans)       | -0.015 | 0.990 | 9.53E-01 | 9.53E+01 |  |
| 8075276 | NM_019103     | ZMAT5     | zinc finger, matrin type 5           | -0.036 | 0.975 | 7.83E-01 | 7.83E+01 |  |
| 8075285 | NM_032204     | ASCC2     | activating signal cointegrator 1 co  | 0.055  | 1.039 | 7.35E-01 | 7.35E+01 |  |
| 8075306 | ---           | ---       | ---                                  | 0.115  | 1.083 | 6.96E-01 | 6.96E+01 |  |
| 8075316 | NM_020530     | OSM       | oncostatin M                         | -0.057 | 0.961 | 5.72E-01 | 5.72E+01 |  |
| 8075322 | NM_00103766   | GATSL3    | GATS protein-like 3                  | -0.023 | 0.984 | 8.85E-01 | 8.85E+01 |  |
| 8075332 | NM_031937     | TBC1D10A  | TBC1 domain family, member 10A       | 0.021  | 1.015 | 9.11E-01 | 9.11E+01 |  |
| 8075343 | NM_005877     | SF3A1     | splicing factor 3a, subunit 1, 120k  | -0.036 | 0.976 | 7.91E-01 | 7.91E+01 |  |
| 8075365 | NM_00101798   | RNF215    | ring finger protein 215              | -0.008 | 0.995 | 9.64E-01 | 9.64E+01 |  |
| 8075390 | NM_174977     | SEC14L4   | SEC14-like 4 (S. cerevisiae)         | 0.045  | 1.032 | 7.36E-01 | 7.36E+01 |  |
| 8075401 | NM_004861     | GAL3ST1   | galactose-3-O-sulfotransferase 1     | -0.008 | 0.994 | 9.56E-01 | 9.56E+01 |  |
| 8075406 | NM_014303     | PES1      | pescadillo homolog 1, containing 5   | -0.003 | 0.998 | 9.90E-01 | 9.90E+01 |  |
| 8075423 | NM_152511     | DUSP18    | dual specificity phosphatase 18      | -0.099 | 0.934 | 6.59E-01 | 6.59E+01 |  |
| 8075430 | NM_014941     | MORC2     | MORC family CW-type zinc finger      | -0.056 | 0.962 | 7.01E-01 | 7.01E+01 |  |
| 8075458 | NM_134270     | SMTN      | smoothenin                           | -0.006 | 0.996 | 9.77E-01 | 9.77E+01 |  |
| 8075462 | NM_080430     | SELM      | selenoprotein M                      | 0.012  | 1.008 | 9.53E-01 | 9.53E+01 |  |
| 8075468 | NM_015715     | PLA2G3    | phospholipase A2, group III          | -0.073 | 0.951 | 5.55E-01 | 5.55E+01 |  |
| 8075477 | NR_024209     | RNF185    | ring finger protein 185              | -0.027 | 0.981 | 9.60E-01 | 9.60E+01 |  |
| 8075481 | ---           | ---       | ---                                  | -0.318 | 0.802 | 2.59E-01 | 2.59E+01 |  |
| 8075483 | NM_052880     | PIK3IP1   | phosphoinositide-3-kinase interac    | -0.169 | 0.890 | 3.27E-01 | 3.27E+01 |  |
| 8075493 | NM_014323     | PATZ1     | POZ (BTB) and AT hook containing     | -0.062 | 0.958 | 5.51E-01 | 5.51E+01 |  |
| 8075507 | NM_019843     | EIF4ENIF1 | eukaryotic translation initiation fa | -0.050 | 0.966 | 7.36E-01 | 7.36E+01 |  |
| 8075529 | NM_014338     | PISD      | phosphatidylserine decarboxylase     | -0.103 | 0.931 | 3.60E-01 | 3.60E+01 |  |
| 8075542 | NM_173566     | C22orf30  | chromosome 22 open reading fram      | 0.017  | 1.012 | 9.01E-01 | 9.01E+01 |  |
| 8075550 | AK294232      | C22orf24  | chromosome 22 open reading fram      | -0.082 | 0.945 | 5.06E-01 | 5.06E+01 |  |
| 8075555 | NM_00101085   | C22orf42  | chromosome 22 open reading fram      | 0.089  | 1.063 | 2.99E-01 | 2.99E+01 |  |
| 8075585 | NM_014306     | C22orf28  | chromosome 22 open reading fram      | 0.177  | 1.131 | 2.11E-01 | 2.11E+01 |  |
| 8075616 | NM_003490     | SYN3      | synapsin III                         | -0.009 | 0.994 | 9.55E-01 | 9.55E+01 |  |
| 8075633 | ---           | ---       | ---                                  | -0.162 | 0.894 | 1.26E-01 | 1.26E+01 |  |
| 8075637 | NM_004737     | LARGE     | like-glycosyltransferase             | 0.089  | 1.063 | 4.41E-01 | 4.41E+01 |  |
| 8075657 | ---           | ---       | ---                                  | 0.029  | 1.020 | 8.31E-01 | 8.31E+01 |  |
| 8075659 | NM_203377     | MB        | myoglobin                            | -0.054 | 0.963 | 7.09E-01 | 7.09E+01 |  |
| 8075668 | ENST000000457 | LOC284912 | hypothetical LOC284912               | -0.037 | 0.975 | 8.13E-01 | 8.13E+01 |  |
| 8075691 | NM_021104     | RPL41     | ribosomal protein L41                | 0.006  | 1.004 | 9.44E-01 | 9.44E+01 |  |
| 8075695 | NR_027833     | APOL3     | apolipoprotein L, 3                  | 0.082  | 1.058 | 6.90E-01 | 6.90E+01 |  |
| 8075705 | ---           | ---       | ---                                  | -0.065 | 0.956 | 6.89E-01 | 6.89E+01 |  |
| 8075720 | NM_030882     | APOL2     | apolipoprotein L, 2                  | 0.098  | 1.071 | 5.98E-01 | 5.98E+01 |  |
| 8075728 | NM_002473     | MYH9      | myosin, heavy chain 9, non-muscl     | -0.147 | 0.903 | 5.53E-02 | 5.53E+00 |  |
| 8075798 | NM_003753     | EIF3D     | eukaryotic translation initiation fa | 0.117  | 1.085 | 1.39E-01 | 1.39E+01 |  |
| 8075817 | ---           | ---       | ---                                  | -0.085 | 0.943 | 3.72E-01 | 3.72E+01 |  |
| 8075828 | NM_006860     | RABL4     | RAB, member of RAS oncogene fa       | 0.022  | 1.015 | 9.16E-01 | 9.16E+01 |  |
| 8075846 | AK075161      | FLJ90680  | FLJ90680 protein                     | -0.068 | 0.954 | 5.49E-01 | 5.49E+01 |  |
| 8075857 | NM_003312     | TST       | thiosulfate sulfurtransferase (rhod  | -0.045 | 0.969 | 8.59E-01 | 8.59E+01 |  |
| 8075863 | ---           | ---       | ---                                  | 0.070  | 1.050 | 5.77E-01 | 5.77E+01 |  |
| 8075865 | NM_153609     | TMPRSS6   | transmembrane protease, serine 6     | -0.059 | 0.960 | 5.29E-01 | 5.29E+01 |  |
| 8075886 | NM_000878     | IL2RB     | interleukin 2 receptor, beta         | -0.170 | 0.889 | 3.39E-01 | 3.39E+01 |  |
| 8075897 | NM_031910     | C1QTNF6   | C1q and tumor necrosis factor rela   | 0.013  | 1.009 | 9.45E-01 | 9.45E+01 |  |
| 8075906 | NM_001051     | SSTR3     | somatostatin receptor 3              | -0.039 | 0.973 | 7.45E-01 | 7.45E+01 |  |
| 8075910 | NM_002872     | RAC2      | ras-related C3 botulinum toxin sub   | -0.078 | 0.947 | 6.07E-01 | 6.07E+01 |  |
| 8075921 | NM_052906     | ELFN2     | extracellular leucine-rich repeat a  | -0.080 | 0.946 | 3.95E-01 | 3.95E+01 |  |
| 8075924 | NM_002405     | MFNG      | MFNG O-fucosylpeptide 3-beta-N-      | 0.063  | 1.044 | 6.80E-01 | 6.80E+01 |  |
| 8075934 | NM_014550     | CARD10    | caspase recruitment domain famil     | -0.067 | 0.955 | 3.99E-01 | 3.99E+01 |  |
| 8075963 | AY364241      | SH3BP1    | SH3-domain binding protein 1         | 0.000  | 1.000 | 1.00E+00 | 1.00E+02 |  |
| 8075969 | ---           | ---       | ---                                  | -0.052 | 0.965 | 7.94E-01 | 7.94E+01 |  |
| 8075971 | NM_138797     | ANKRD54   | ankyrin repeat domain 54             | -0.074 | 0.950 | 4.47E-01 | 4.47E+01 |  |
| 8075981 | AF324466      | C22orf23  | chromosome 22 open reading fram      | 0.006  | 1.004 | 9.75E-01 | 9.75E+01 |  |
| 8075992 | NM_006941     | SOX10     | SRY (sex determining region Y)-bo    | -0.004 | 0.997 | 9.78E-01 | 9.78E+01 |  |
| 8076002 | NM_013356     | SLC16A8   | solute carrier family 16, member 8   | 0.039  | 1.027 | 6.94E-01 | 6.94E+01 |  |
| 8076007 | NM_025045     | BAIAP2L2  | BAI1-associated protein 2-like 2     | 0.031  | 1.022 | 7.54E-01 | 7.54E+01 |  |
| 8076025 | NM_003560     | PLA2G6    | phospholipase A2, group VI (cytos    | -0.008 | 0.995 | 9.72E-01 | 9.72E+01 |  |
| 8076046 | NM_012264     | TMEM184B  | transmembrane protein 184B           | -0.137 | 0.910 | 3.76E-01 | 3.76E+01 |  |
| 8076056 | NM_001894     | CSNK1E    | casein kinase 1, epsilon             | -0.218 | 0.860 | 4.14E-03 | 4.14E-01 |  |
| 8076072 | NM_152868     | KCNJ4     | potassium inwardly-rectifying cha    | -0.009 | 0.993 | 9.52E-01 | 9.52E+01 |  |
| 8076077 | NM_006386     | DDX17     | DEAD (Asp-Glu-Ala-Asp) box polyp     | -0.003 | 0.998 | 9.80E-01 | 9.80E+01 |  |
| 8076128 | NM_014876     | JOSD1     | Josephin domain containing 1         | -0.271 | 0.829 | 6.30E-02 | 6.30E+00 |  |

|         |             |           |                                      |        |       |          |          |  |
|---------|-------------|-----------|--------------------------------------|--------|-------|----------|----------|--|
| 8076137 | NM_015374   | UNC84B    | unc-84 homolog B (C. elegans)        | 0.023  | 1.016 | 8.62E-01 | 8.62E+01 |  |
| 8076169 | NM_014293   | NPTXR     | neuronal pentraxin receptor          | 0.014  | 1.010 | 9.22E-01 | 9.22E+01 |  |
| 8076185 | NM_175709   | CBX7      | chromobox homolog 7                  | -0.188 | 0.878 | 5.26E-02 | 5.26E+00 |  |
| 8076193 | AK074445    | FLJ23865  | hypothetical protein FLJ23865        | 0.027  | 1.019 | 9.19E-01 | 9.19E+01 |  |
| 8076195 | NM_002608   | PDGFB     | platelet-derived growth factor bet   | -0.035 | 0.976 | 7.77E-01 | 7.77E+01 |  |
| 8076209 | NM_000967   | RPL3      | ribosomal protein L3                 | -0.010 | 0.993 | 9.57E-01 | 9.57E+01 |  |
| 8076219 | NR_000028   | SNORD83B  | small nucleolar RNA, C/D box 83B     | -0.060 | 0.959 | 7.44E-01 | 7.44E+01 |  |
| 8076221 | NR_000027   | SNORD83A  | small nucleolar RNA, C/D box 83A     | -0.002 | 0.998 | 9.93E-01 | 9.93E+01 |  |
| 8076223 | NR_002439   | SNORD43   | small nucleolar RNA, C/D box 43      | -0.282 | 0.823 | 2.81E-01 | 2.81E+01 |  |
| 8076225 | NM_194326   | RPS19BP1  | ribosomal protein S19 binding pro    | 0.056  | 1.039 | 6.81E-01 | 6.81E+01 |  |
| 8076241 | NM_020831   | MKL1      | megakaryoblastic leukemia (transl    | -0.072 | 0.951 | 2.81E-01 | 2.81E+01 |  |
| 8076260 | NM_006358   | SLC25A17  | solute carrier family 25 (mitochond  | -0.010 | 0.993 | 9.65E-01 | 9.65E+01 |  |
| 8076272 | NM_003932   | ST13      | suppression of tumorigenicity 13 (   | -0.026 | 0.982 | 8.23E-01 | 8.23E+01 |  |
| 8076298 | ---         | ---       | ---                                  | -0.005 | 0.997 | 9.83E-01 | 9.83E+01 |  |
| 8076302 | NM_138481   | CHADL     | chondroadherin-like                  | -0.049 | 0.967 | 5.63E-01 | 5.63E+01 |  |
| 8076307 | NM_002883   | RANGAP1   | Ran GTPase activating protein 1      | 0.025  | 1.018 | 8.84E-01 | 8.84E+01 |  |
| 8076331 | NM_016272   | TOB2      | transducer of ERBB2, 2               | -0.060 | 0.959 | 6.74E-01 | 6.74E+01 |  |
| 8076339 | NM_032758   | PHF5A     | PHD finger protein 5A                | -0.003 | 0.998 | 9.92E-01 | 9.92E+01 |  |
| 8076344 | NM_00101805 | POLR3H    | polymerase (RNA) III (DNA directe    | -0.064 | 0.956 | 6.10E-01 | 6.10E+01 |  |
| 8076355 | NM_002676   | PMM1      | phosphomannomutase 1                 | 0.003  | 1.002 | 9.88E-01 | 9.88E+01 |  |
| 8076365 | NM_015704   | PPPDE2    | PPPDE peptidase domain containi      | -0.073 | 0.951 | 5.78E-01 | 5.78E+01 |  |
| 8076374 | NM_005008   | NHP2L1    | NHP2 non-histone chromosome p        | -0.031 | 0.979 | 8.70E-01 | 8.70E+01 |  |
| 8076384 | ---         | ---       | ---                                  | -0.065 | 0.956 | 7.39E-01 | 7.39E+01 |  |
| 8076387 | NM_052945   | TNFRSF13C | tumor necrosis factor receptor sup   | -0.039 | 0.974 | 7.05E-01 | 7.05E+01 |  |
| 8076393 | NM_024053   | CENPM     | centromere protein M                 | -0.026 | 0.982 | 8.44E-01 | 8.44E+01 |  |
| 8076403 | NM_000262   | NAGA      | N-acetylgalactosaminidase, alpha-    | 0.237  | 1.178 | 9.57E-02 | 9.57E+00 |  |
| 8076417 | NM_002490   | NDUFA6    | NADH dehydrogenase (ubiquinone)      | -0.082 | 0.945 | 5.09E-01 | 5.09E+01 |  |
| 8076424 | NM_000106   | CYP2D6    | cytochrome P450, family 2, subfar    | 0.043  | 1.030 | 8.73E-01 | 8.73E+01 |  |
| 8076431 | NR_002570   | CYP2D7P1  | cytochrome P450, family 2, subfar    | -0.071 | 0.952 | 6.71E-01 | 6.71E+01 |  |
| 8076436 | NM_005650   | TCF20     | transcription factor 20 (AR1)        | -0.070 | 0.953 | 6.82E-01 | 6.82E+01 |  |
| 8076441 | NM_145912   | NFAM1     | NFAT activating protein with ITAM    | 0.057  | 1.040 | 5.34E-01 | 5.34E+01 |  |
| 8076449 | NR_002184   | RRP7B     | ribosomal RNA processing 7 homod     | 0.016  | 1.011 | 9.28E-01 | 9.28E+01 |  |
| 8076455 | NM_015703   | RRP7A     | ribosomal RNA processing 7 homod     | 0.081  | 1.058 | 6.01E-01 | 6.01E+01 |  |
| 8076461 | ---         | ---       | ---                                  | 0.070  | 1.049 | 7.59E-01 | 7.59E+01 |  |
| 8076463 | BC014647    | RRP7B     | ribosomal RNA processing 7 homod     | 0.102  | 1.074 | 7.73E-01 | 7.73E+01 |  |
| 8076465 | NM_032311   | POLDIP3   | polymerase (DNA-directed), delta     | 0.003  | 1.002 | 9.88E-01 | 9.88E+01 |  |
| 8076481 | NM_000398   | CYB5R3    | cytochrome b5 reductase 3            | -0.147 | 0.903 | 2.27E-01 | 2.27E+01 |  |
| 8076493 | AF092923    | ATP5L2    | ATP synthase, H+ transporting, mi    | -0.030 | 0.980 | 9.07E-01 | 9.07E+01 |  |
| 8076497 | NM_017436   | A4GALT    | alpha 1,4-galactosyltransferase      | -0.142 | 0.906 | 7.17E-02 | 7.17E+00 |  |
| 8076509 | ---         | ---       | ---                                  | -0.115 | 0.923 | 3.81E-01 | 3.81E+01 |  |
| 8076511 | NM_000969   | RPL5      | ribosomal protein L5                 | -0.001 | 0.999 | 9.96E-01 | 9.96E+01 |  |
| 8076513 | ---         | ---       | ---                                  | -0.033 | 0.977 | 7.87E-01 | 7.87E+01 |  |
| 8076515 | NM_014570   | ARFGAP3   | ADP-ribosylation factor GTPase ac    | 0.119  | 1.086 | 4.39E-01 | 4.39E+01 |  |
| 8076533 | NM_007229   | PACSIN2   | protein kinase C and casein kinase   | 0.039  | 1.027 | 8.47E-01 | 8.47E+01 |  |
| 8076547 | NR_027779   | TTL1      | tubulin tyrosine ligase-like family, | -0.003 | 0.998 | 9.87E-01 | 9.87E+01 |  |
| 8076561 | AB051441    | KIAA1654  | KIAA1654 protein                     | 0.026  | 1.018 | 8.54E-01 | 8.54E+01 |  |
| 8076563 | NM_173467   | MCAT      | malonyl CoA:ACP acyltransferase (    | -0.022 | 0.985 | 8.97E-01 | 8.97E+01 |  |
| 8076569 | NM_015140   | TTL12     | tubulin tyrosine ligase-like family, | -0.050 | 0.966 | 6.31E-01 | 6.31E+01 |  |
| 8076584 | AK056490    | FLJ30901  | hypothetical protein FLJ30901        | -0.022 | 0.985 | 8.71E-01 | 8.71E+01 |  |
| 8076586 | NM_173050   | SCUBE1    | signal peptide, CUB domain, EGF-l    | -0.050 | 0.966 | 7.47E-01 | 7.47E+01 |  |
| 8076686 | BC104183    | KIAA1644  | KIAA1644                             | -0.035 | 0.976 | 8.37E-01 | 8.37E+01 |  |
| 8076673 | NM_032287   | LDOC1L    | leucine zipper, down-regulated in    | -0.030 | 0.979 | 8.67E-01 | 8.67E+01 |  |
| 8076677 | NM_138415   | PHF21B    | PHD finger protein 21B               | 0.011  | 1.007 | 9.47E-01 | 9.47E+01 |  |
| 8076690 | NM_00100988 | C22orf9   | chromosome 22 open reading fram      | 0.254  | 1.192 | 5.20E-02 | 5.20E+00 |  |
| 8076732 | ---         | ---       | ---                                  | -0.029 | 0.980 | 8.18E-01 | 8.18E+01 |  |
| 8076734 | NM_058238   | WNT7B     | wingless-type MMTV integration s     | -0.112 | 0.925 | 2.71E-01 | 2.71E+01 |  |
| 8076739 | NM_018280   | C22orf26  | chromosome 22 open reading fram      | 0.013  | 1.009 | 9.53E-01 | 9.53E+01 |  |
| 8076744 | BC009388    | LOC554174 | hypothetical LOC554174               | -0.074 | 0.950 | 5.38E-01 | 5.38E+01 |  |
| 8076747 | AK123383    | LOC642648 | hypothetical LOC642648               | 0.008  | 1.006 | 9.67E-01 | 9.67E+01 |  |
| 8076749 | NM_207327   | C22orf40  | chromosome 22 open reading fram      | -0.008 | 0.994 | 9.77E-01 | 9.77E+01 |  |
| 8076757 | NM_014246   | CELSR1    | cadherin, EGF LAG seven-pass G-t     | -0.082 | 0.945 | 3.82E-01 | 3.82E+01 |  |
| 8076792 | NM_022766   | CERK      | ceramide kinase                      | -0.108 | 0.928 | 3.31E-01 | 3.31E+01 |  |
| 8076813 | BC041833    | FLJ32756  | hypothetical LOC642757               | -0.008 | 0.995 | 9.77E-01 | 9.77E+01 |  |
| 8076815 | AY358194    | UNQ6126   | LPEQ6126                             | -0.039 | 0.973 | 7.70E-01 | 7.70E+01 |  |
| 8076826 | NR_026997   | C22orf34  | chromosome 22 open reading fram      | -0.040 | 0.973 | 8.07E-01 | 8.07E+01 |  |
| 8076836 | NM_014577   | BRD1      | bromodomain containing 1             | -0.094 | 0.937 | 2.99E-01 | 2.99E+01 |  |
| 8076851 | NM_024105   | ALG12     | asparagine-linked glycosylation 12   | -0.008 | 0.995 | 9.49E-01 | 9.49E+01 |  |
| 8076865 | NM_00100169 | IL17REL   | interleukin 17 receptor E-like       | -0.036 | 0.976 | 7.59E-01 | 7.59E+01 |  |
| 8076882 | NM_00108044 | TTL8      | tubulin tyrosine ligase-like family, | 0.074  | 1.053 | 5.55E-01 | 5.55E+01 |  |
| 8076894 | NM_015166   | MLC1      | megalencephalic leukoencephalog      | 0.115  | 1.083 | 2.52E-01 | 2.52E+01 |  |
| 8076909 | NM_020461   | TUBGCP6   | tubulin, gamma complex associat      | -0.049 | 0.967 | 6.34E-01 | 6.34E+01 |  |
| 8076937 | NM_032019   | HDAC10    | histone deacetylase 10               | -0.064 | 0.957 | 5.09E-01 | 5.09E+01 |  |
| 8076962 | NM_002969   | MAPK12    | mitogen-activated protein kinase     | 0.011  | 1.008 | 9.53E-01 | 9.53E+01 |  |
| 8076978 | NM_002751   | MAPK11    | mitogen-activated protein kinase     | -0.043 | 0.971 | 6.62E-01 | 6.62E+01 |  |
| 8076998 | NM_012401   | PLXB2     | plexin B2                            | 0.102  | 1.074 | 5.34E-01 | 5.34E+01 |  |
| 8077036 | BC031069    | FAM116B   | family with sequence similarity 11   | -0.040 | 0.973 | 6.35E-01 | 6.35E+01 |  |
| 8077042 | NM_002972   | SBF1      | SET binding factor 1                 | -0.035 | 0.976 | 7.78E-01 | 7.78E+01 |  |

|         |             |              |                                      |        |       |          |          |
|---------|-------------|--------------|--------------------------------------|--------|-------|----------|----------|
| 8077082 | NM_033200   | LMF2         | lipase maturation factor 2           | 0.003  | 1.002 | 9.85E-01 | 9.85E+01 |
| 8077099 | NM_005138   | SCO2         | SCO cytochrome oxidase deficient     | 0.004  | 1.002 | 9.87E-01 | 9.87E+01 |
| 8077103 | NM_00111375 | TYMP         | thymidine phosphorylase              | 0.135  | 1.098 | 2.79E-01 | 2.79E+01 |
| 8077116 | NM_00101444 | ODF3B        | outer dense fiber of sperm tails 3B  | -0.041 | 0.972 | 8.43E-01 | 8.43E+01 |
| 8077123 | NR_027928   | CHKB-CPT1B   | choline kinase-like, carnitine palm  | -0.019 | 0.987 | 9.00E-01 | 9.00E+01 |
| 8077160 | NM_000487   | ARSA         | arylsulfatase A                      | -0.044 | 0.970 | 7.95E-01 | 7.95E+01 |
| 8077171 | NM_00113092 | RABL2B       | RAB, member of RAS oncogene fa       | 0.035  | 1.024 | 8.41E-01 | 8.41E+01 |
| 8077185 | NM_000039   | APOA1        | apolipoprotein A-I                   | 0.015  | 1.010 | 8.86E-01 | 8.86E+01 |
| 8077192 | NM_000482   | APOA4        | apolipoprotein A-IV                  | 0.014  | 1.010 | 8.87E-01 | 8.87E+01 |
| 8077204 | NM_000040   | APOC3        | apolipoprotein C-III                 | -0.010 | 0.993 | 9.51E-01 | 9.51E+01 |
| 8077211 | NM_013325   | ATG4B        | ATG4 autophagy related 4 homolo      | 0.004  | 1.003 | 9.86E-01 | 9.86E+01 |
| 8077226 | NM_032329   | ING5         | inhibitor of growth family, membe    | 0.078  | 1.056 | 6.80E-01 | 6.80E+01 |
| 8077238 | NM_152783   | D2HGDH       | D-2-hydroxyglutarate dehydrogen      | -0.060 | 0.959 | 5.21E-01 | 5.21E+01 |
| 8077250 | NM_015963   | THAP4        | THAP domain containing 4             | 0.000  | 1.000 | 1.00E+00 | 1.00E+02 |
| 8077262 | NM_012145   | DTYMK        | deoxythymidylate kinase (thymidy     | -0.032 | 0.978 | 8.87E-01 | 8.87E+01 |
| 8077351 | ---         | ---          | ---                                  | -0.020 | 0.986 | 9.24E-01 | 9.24E+01 |
| 8077353 | NM_182916   | TRNT1        | tRNA nucleotidyl transferase, CCA    | -0.022 | 0.985 | 9.32E-01 | 9.32E+01 |
| 8077370 | NM_006515   | SETMAR       | SET domain and mariner transpos      | -0.014 | 0.990 | 9.61E-01 | 9.61E+01 |
| 8077376 | NM_00109995 | ITPR1        | inositol 1,4,5-triphosphate recept   | 0.074  | 1.053 | 4.87E-01 | 4.87E+01 |
| 8077441 | NM_003670   | BHLHE40      | basic helix-loop-helix family, mem   | -0.280 | 0.824 | 6.52E-02 | 6.52E+00 |
| 8077450 | NM_018184   | ARL8B        | ADP-ribosylation factor-like 8B      | 0.023  | 1.016 | 9.36E-01 | 9.36E+01 |
| 8077458 | NM_014674   | EDEM1        | ER degradation enhancer, mannoso     | 0.035  | 1.024 | 8.25E-01 | 8.25E+01 |
| 8077490 | NM_014583   | LMCD1        | LIM and cysteine-rich domains 1      | 0.009  | 1.006 | 9.51E-01 | 9.51E+01 |
| 8077513 | NM_015453   | THUMP3       | THUMP domain containing 3            | 0.052  | 1.037 | 7.60E-01 | 7.60E+01 |
| 8077526 | ---         | ---          | ---                                  | -0.063 | 0.957 | 7.51E-01 | 7.51E+01 |
| 8077528 | NM_00108051 | SETD5        | SET domain containing 5              | -0.102 | 0.932 | 7.53E-02 | 7.53E+00 |
| 8077550 | NM_00107752 | MTMR14       | myotubularin related protein 14      | 0.091  | 1.065 | 4.02E-01 | 4.02E+01 |
| 8077595 | NM_00100369 | BRPF1        | bromodomain and PHD finger con       | 0.043  | 1.030 | 6.76E-01 | 6.76E+01 |
| 8077612 | NM_00102593 | TTL3         | tubulin tyrosine ligase-like family, | 0.097  | 1.069 | 3.66E-01 | 3.66E+01 |
| 8077635 | NM_016819   | OGG1         | 8-oxoguanine DNA glycosylase         | 0.086  | 1.062 | 3.67E-01 | 3.67E+01 |
| 8077652 | NM_005718   | ARPC4        | actin related protein 2/3 complex,   | 0.150  | 1.110 | 2.48E-01 | 2.48E+01 |
| 8077663 | NM_032492   | JAGN1        | jagunal homolog 1 (Drosophila)       | -0.002 | 0.998 | 9.93E-01 | 9.93E+01 |
| 8077668 | NM_153480   | IL17RE       | interleukin 17 receptor E            | -0.051 | 0.965 | 6.66E-01 | 6.66E+01 |
| 8077688 | NM_153461   | IL17RC       | interleukin 17 receptor C            | -0.079 | 0.947 | 2.98E-01 | 2.98E+01 |
| 8077712 | NM_00103171 | CRELD1       | cysteine-rich with EGF-like domain   | -0.006 | 0.996 | 9.77E-01 | 9.77E+01 |
| 8077728 | AK092352    | LOC442075    | hypothetical LOC442075               | -0.052 | 0.965 | 8.36E-01 | 8.36E+01 |
| 8077770 | NM_018462   | C3orf10      | chromosome 3 open reading fram       | -0.050 | 0.966 | 8.11E-01 | 8.11E+01 |
| 8077777 | ---         | ---          | ---                                  | -0.049 | 0.967 | 9.31E-01 | 9.31E+01 |
| 8077779 | ---         | ---          | ---                                  | -0.063 | 0.957 | 6.92E-01 | 6.92E+01 |
| 8077781 | NM_000551   | VHL          | von Hippel-Lindau tumor suppress     | 0.083  | 1.059 | 5.43E-01 | 5.43E+01 |
| 8077786 | NM_001570   | IRAK2        | interleukin-1 receptor-associated    | -0.213 | 0.863 | 1.03E-02 | 1.03E+00 |
| 8077804 | NM_014760   | TATDN2       | TatD DNase domain containing 2       | -0.016 | 0.989 | 9.50E-01 | 9.50E+01 |
| 8077815 | NR_026829   | C3orf42      | chromosome 3 open reading fram       | 0.005  | 1.004 | 9.88E-01 | 9.88E+01 |
| 8077851 | NM_00109821 | HRH1         | histamine receptor H1                | -0.070 | 0.952 | 5.91E-01 | 5.91E+01 |
| 8077858 | NM_006395   | ATG7         | ATG7 autophagy related 7 homolo      | 0.083  | 1.059 | 7.83E-01 | 7.83E+01 |
| 8077877 | AK094424    | LOC100130924 | hypothetical LOC100130924            | -0.065 | 0.956 | 7.72E-01 | 7.72E+01 |
| 8077879 | NM_133625   | SYN2         | synapsin II                          | -0.001 | 1.000 | 9.97E-01 | 9.97E+01 |
| 8077914 | NM_025265   | TSEN2        | tRNA splicing endonuclease 2 hom     | -0.021 | 0.986 | 9.53E-01 | 9.53E+01 |
| 8077929 | ---         | ---          | ---                                  | 0.028  | 1.020 | 9.54E-01 | 9.54E+01 |
| 8077931 | NM_014160   | MKRN2        | makorin ring finger protein 2        | -0.015 | 0.990 | 9.49E-01 | 9.49E+01 |
| 8077942 | ---         | ---          | ---                                  | 0.185  | 1.136 | 6.05E-01 | 6.05E+01 |
| 8077944 | NM_00116249 | CAND2        | cullin-associated and neddylation-   | -0.081 | 0.945 | 4.92E-01 | 4.92E+01 |
| 8077970 | NM_00100401 | FBLN2        | fibulin 2                            | -0.018 | 0.988 | 9.07E-01 | 9.07E+01 |
| 8077989 | NR_002223   | TPRXL        | tetra-peptide repeat homeobox-li     | 0.049  | 1.035 | 6.36E-01 | 6.36E+01 |
| 8077993 | NM_024334   | TMEM43       | transmembrane protein 43             | -0.039 | 0.973 | 7.94E-01 | 7.94E+01 |
| 8078008 | NM_014463   | LSM3         | LSM3 homolog, U6 small nuclear R     | 0.086  | 1.061 | 4.51E-01 | 4.51E+01 |
| 8078014 | NM_003043   | SLC6A6       | solute carrier family 6 (neurotrans  | -0.155 | 0.898 | 3.89E-01 | 3.89E+01 |
| 8078033 | NM_016474   | C3orf19      | chromosome 3 open reading fram       | -0.019 | 0.987 | 9.13E-01 | 9.13E+01 |
| 8078091 | NM_003298   | NR2C2        | nuclear receptor subfamily 2, group  | -0.105 | 0.930 | 1.71E-01 | 1.71E+01 |
| 8078110 | NM_014296   | CAPN7        | calpain 7                            | -0.048 | 0.967 | 7.48E-01 | 7.48E+01 |
| 8078136 | ---         | ---          | ---                                  | 0.061  | 1.043 | 5.94E-01 | 5.94E+01 |
| 8078138 | NM_033083   | EAF1         | ELL associated factor 1              | -0.050 | 0.966 | 7.43E-01 | 7.43E+01 |
| 8078147 | NM_000060   | BTD          | biotinidase                          | -0.113 | 0.925 | 3.06E-01 | 3.06E+01 |
| 8078153 | ---         | ---          | ---                                  | -0.144 | 0.905 | 3.76E-01 | 3.76E+01 |
| 8078173 | NM_138381   | OXNAD1       | oxidoreductase NAD-binding dom       | 0.041  | 1.029 | 8.74E-01 | 8.74E+01 |
| 8078187 | NM_015184   | PLCL2        | phospholipase C-like 2               | 0.088  | 1.063 | 6.59E-01 | 6.59E+01 |
| 8078214 | NM_004162   | RAB5A        | RAB5A, member RAS oncogene fa        | 0.142  | 1.103 | 6.65E-02 | 6.65E+00 |
| 8078227 | NM_003884   | KAT2B        | K[lysine] acetyltransferase 2B       | 0.144  | 1.105 | 1.34E-01 | 1.34E+01 |
| 8078248 | NM_002128   | HMGB1        | high-mobility group box 1            | -0.006 | 0.996 | 9.66E-01 | 9.66E+01 |
| 8078260 | ---         | ---          | ---                                  | 0.095  | 1.068 | 5.91E-01 | 5.91E+01 |
| 8078262 | NM_003341   | UBE2E1       | ubiquitin-conjugating enzyme E2E     | 0.206  | 1.153 | 3.02E-02 | 3.02E+00 |
| 8078270 | NM_002948   | RPL15        | ribosomal protein L15                | 0.011  | 1.008 | 9.63E-01 | 9.63E+01 |
| 8078272 | NM_005126   | NR1D2        | nuclear receptor subfamily 1, group  | 0.009  | 1.006 | 9.74E-01 | 9.74E+01 |
| 8078300 | NM_017897   | OXSM         | 3-oxoacyl-ACP synthase, mitochond    | 0.080  | 1.057 | 5.77E-01 | 5.77E+01 |
| 8078305 | NM_052953   | LRRC3B       | leucine rich repeat containing 3B    | -0.036 | 0.975 | 7.69E-01 | 7.69E+01 |
| 8078312 | NM_182523   | CMC1         | COX assembly mitochondrial prote     | 0.114  | 1.082 | 5.23E-01 | 5.23E+01 |
| 8078350 | NM_00102484 | TGFBR2       | transforming growth factor, beta 2   | 0.069  | 1.049 | 6.34E-01 | 6.34E+01 |

|         |             |           |                                      |        |       |          |          |  |  |
|---------|-------------|-----------|--------------------------------------|--------|-------|----------|----------|--|--|
| 8078360 | NM_178862   | STT3B     | STT3, subunit of the oligosacchary   | 0.167  | 1.123 | 1.83E-02 | 1.83E+00 |  |  |
| 8078378 | ---         | ---       | ---                                  | 0.037  | 1.026 | 9.09E-01 | 9.09E+01 |  |  |
| 8078397 | NM_178868   | CMTM8     | CKLF-like MARVEL transmembrane       | -0.007 | 0.995 | 9.86E-01 | 9.86E+01 |  |  |
| 8078405 | NM_138410   | CMTM7     | CKLF-like MARVEL transmembrane       | 0.036  | 1.025 | 8.51E-01 | 8.51E+01 |  |  |
| 8078412 | NM_015442   | CNOT10    | CCR4-NOT transcription complex,      | 0.064  | 1.045 | 6.23E-01 | 6.23E+01 |  |  |
| 8078435 | NM_00103911 | TRIM71    | tripartite motif-containing 71       | -0.034 | 0.977 | 7.97E-01 | 7.97E+01 |  |  |
| 8078442 | NM_005508   | CCR4      | chemokine (C-C motif) receptor 4     | -0.303 | 0.811 | 2.11E-01 | 2.11E+01 |  |  |
| 8078450 | NM_006371   | CRTAP     | cartilage associated protein         | 0.020  | 1.014 | 9.18E-01 | 9.18E+01 |  |  |
| 8078479 | NM_013374   | PDCD6IP   | programmed cell death 6 interacti    | 0.023  | 1.016 | 9.10E-01 | 9.10E+01 |  |  |
| 8078544 | NM_000249   | MLH1      | mutL homolog 1, colon cancer, no     | 0.077  | 1.055 | 5.81E-01 | 5.81E+01 |  |  |
| 8078567 | ---         | ---       | ---                                  | 0.036  | 1.025 | 8.39E-01 | 8.39E+01 |  |  |
| 8078569 | NM_002078   | GOLGA4    | golgi autoantigen, golgin subfamili  | -0.031 | 0.978 | 8.06E-01 | 8.06E+01 |  |  |
| 8078600 | NM_006756   | TCEA1     | transcription elongation factor A (  | 0.014  | 1.010 | 9.27E-01 | 9.27E+01 |  |  |
| 8078603 | ---         | ---       | ---                                  | 0.054  | 1.038 | 8.78E-01 | 8.78E+01 |  |  |
| 8078605 | NM_178339   | C3orf35   | chromosome 3 open reading fram       | -0.119 | 0.921 | 2.56E-01 | 2.56E+01 |  |  |
| 8078619 | NM_002207   | ITGA9     | integrin, alpha 9                    | -0.074 | 0.950 | 5.50E-01 | 5.50E+01 |  |  |
| 8078650 | NM_00100839 | CTDSPL    | CTD (carboxy-terminal domain, RN     | 0.009  | 1.006 | 9.51E-01 | 9.51E+01 |  |  |
| 8078665 | NM_015873   | VILL      | villin-like                          | -0.072 | 0.951 | 5.01E-01 | 5.01E+01 |  |  |
| 8078688 | ---         | ---       | ---                                  | 0.132  | 1.096 | 7.09E-01 | 7.09E+01 |  |  |
| 8078690 | NM_007335   | DLEC1     | deleted in lung and esophageal ca    | -0.041 | 0.972 | 7.52E-01 | 7.52E+01 |  |  |
| 8078738 | NM_005109   | OXSRI     | oxidative-stress responsive 1        | -0.111 | 0.926 | 4.14E-01 | 4.14E+01 |  |  |
| 8078759 | NM_004256   | SLC22A13  | solute carrier family 22 (organic an | 0.015  | 1.010 | 9.38E-01 | 9.38E+01 |  |  |
| 8078818 | NM_005107   | EXOGE     | endo/exonuclease (5'-3'), endonu     | 0.088  | 1.063 | 5.72E-01 | 5.72E+01 |  |  |
| 8078832 | ---         | ---       | ---                                  | 0.148  | 1.108 | 3.57E-01 | 3.57E+01 |  |  |
| 8078834 | NM_020839   | WDR48     | WD repeat domain 48                  | -0.043 | 0.971 | 8.10E-01 | 8.10E+01 |  |  |
| 8078857 | NM_00110551 | TTC21A    | tetratricopeptide repeat domain 2    | 0.057  | 1.040 | 5.79E-01 | 5.79E+01 |  |  |
| 8078898 | NM_017875   | SLC25A38  | solute carrier family 25, member 3   | -0.069 | 0.953 | 7.07E-01 | 7.07E+01 |  |  |
| 8078905 | NM_002295   | RPSA      | ribosomal protein SA                 | -0.038 | 0.974 | 8.54E-01 | 8.54E+01 |  |  |
| 8078916 | NR_002325   | SNORA6    | small nucleolar RNA, H/ACA box 6     | -0.002 | 0.999 | 9.97E-01 | 9.97E+01 |  |  |
| 8078918 | NR_002324   | SNORA62   | small nucleolar RNA, H/ACA box 6     | 0.085  | 1.061 | 8.69E-01 | 8.69E+01 |  |  |
| 8078933 | NM_015460   | MYRIP     | myosin VIIA and Rab interacting pr   | 0.010  | 1.007 | 9.51E-01 | 9.51E+01 |  |  |
| 8078958 | ---         | ---       | ---                                  | -0.062 | 0.958 | 7.17E-01 | 7.17E+01 |  |  |
| 8078960 | ---         | ---       | ---                                  | 0.034  | 1.024 | 8.24E-01 | 8.24E+01 |  |  |
| 8078962 | NM_005875   | EIF1B     | eukaryotic translation initiation fa | -0.067 | 0.954 | 6.07E-01 | 6.07E+01 |  |  |
| 8078984 | NM_003973   | RPL14     | ribosomal protein L14                | -0.056 | 0.962 | 5.55E-01 | 5.55E+01 |  |  |
| 8078999 | NM_175888   | ZNF620    | zinc finger protein 620              | 0.011  | 1.008 | 9.65E-01 | 9.65E+01 |  |  |
| 8079005 | NM_198484   | ZNF621    | zinc finger protein 621              | 0.046  | 1.033 | 7.93E-01 | 7.93E+01 |  |  |
| 8079019 | NM_001030   | RPS27     | ribosomal protein S27                | -0.025 | 0.983 | 8.90E-01 | 8.90E+01 |  |  |
| 8079021 | NM_001904   | CTNBN1    | catenin (cadherin-associated prote   | 0.049  | 1.035 | 7.51E-01 | 7.51E+01 |  |  |
| 8079037 | NM_00104264 | TRAK1     | trafficking protein, kinesin binding | 0.044  | 1.031 | 7.75E-01 | 7.75E+01 |  |  |
| 8079060 | NM_004624   | VIPR1     | vasoactive intestinal peptide rece   | 0.052  | 1.037 | 6.20E-01 | 6.20E+01 |  |  |
| 8079074 | NM_016305   | SS18L2    | synovial sarcoma translocation ge    | -0.019 | 0.987 | 9.22E-01 | 9.22E+01 |  |  |
| 8079079 | NM_005385   | NKTR      | natural killer-tumor recognition se  | -0.060 | 0.959 | 6.53E-01 | 6.53E+01 |  |  |
| 8079099 | NM_145166   | ZBTB47    | zinc finger and BTB domain contai    | -0.030 | 0.980 | 7.77E-01 | 7.77E+01 |  |  |
| 8079107 | NM_152393   | KBTBD5    | kelch repeat and BTB (POZ) domai     | -0.053 | 0.964 | 6.15E-01 | 6.15E+01 |  |  |
| 8079131 | NM_00112990 | LOC729085 | hypothetical protein LOC729085       | -0.005 | 0.996 | 9.79E-01 | 9.79E+01 |  |  |
| 8079140 | NM_017719   | SNRK      | SNF related kinase                   | 0.025  | 1.017 | 9.00E-01 | 9.00E+01 |  |  |
| 8079149 | ---         | ---       | ---                                  | 0.055  | 1.039 | 8.47E-01 | 8.47E+01 |  |  |
| 8079153 | NM_016006   | ABHD5     | abhydrolase domain containing 5      | 0.045  | 1.032 | 9.12E-01 | 9.12E+01 |  |  |
| 8079165 | ---         | ---       | ---                                  | -0.037 | 0.974 | 7.61E-01 | 7.61E+01 |  |  |
| 8079167 | NM_00114503 | C3orf77   | chromosome 3 open reading fram       | -0.034 | 0.977 | 8.21E-01 | 8.21E+01 |  |  |
| 8079187 | AK131507    | ZNF852    | zinc finger protein 852              | 0.040  | 1.028 | 9.35E-01 | 9.35E+01 |  |  |
| 8079189 | NM_018651   | ZNF167    | zinc finger protein 167              | 0.022  | 1.015 | 9.34E-01 | 9.34E+01 |  |  |
| 8079217 | NM_003420   | ZNF35     | zinc finger protein 35               | -0.001 | 1.000 | 9.99E-01 | 9.99E+01 |  |  |
| 8079274 | NM_144638   | TMEM42    | transmembrane protein 42             | -0.042 | 0.971 | 7.64E-01 | 7.64E+01 |  |  |
| 8079279 | NM_003241   | TGM4      | transglutaminase 4 (prostate)        | 0.007  | 1.005 | 9.66E-01 | 9.66E+01 |  |  |
| 8079294 | NM_015004   | EXOSC7    | exosome component 7                  | 0.042  | 1.030 | 8.12E-01 | 8.12E+01 |  |  |
| 8079305 | NM_003278   | CLEC3B    | C-type lectin domain family 3, me    | -0.045 | 0.970 | 7.07E-01 | 7.07E+01 |  |  |
| 8079311 | NM_015340   | LARS2     | leucyl-tRNA synthetase 2, mitoch     | 0.037  | 1.026 | 8.47E-01 | 8.47E+01 |  |  |
| 8079334 | NM_014240   | LIMD1     | LIM domains containing 1             | 0.159  | 1.116 | 1.12E-01 | 1.12E+01 |  |  |
| 8079346 | NM_014016   | SACM1L    | SAC1 suppressor of actin mutatior    | 0.093  | 1.067 | 3.42E-01 | 3.42E+01 |  |  |
| 8079368 | ---         | ---       | ---                                  | 0.108  | 1.077 | 7.54E-01 | 7.54E+01 |  |  |
| 8079377 | NM_006564   | CXCR6     | chemokine (C-X-C motif) receptor     | -0.022 | 0.985 | 9.53E-01 | 9.53E+01 |  |  |
| 8079426 | NM_147196   | TMIE      | transmembrane inner ear              | -0.023 | 0.984 | 9.09E-01 | 9.09E+01 |  |  |
| 8079462 | NM_015175   | NBEAL2    | neurobeachin-like 2                  | -0.070 | 0.953 | 3.29E-01 | 3.29E+01 |  |  |
| 8079517 | NM_025010   | KLHL18    | kelch-like 18 (Drosophila)           | -0.029 | 0.980 | 8.29E-01 | 8.29E+01 |  |  |
| 8079532 | NM_015466   | PTPN23    | protein tyrosine phosphatase, non    | -0.043 | 0.971 | 6.05E-01 | 6.05E+01 |  |  |
| 8079563 | NM_138615   | DHX30     | DEAH (Asp-Glu-Ala-His) box polyp     | -0.120 | 0.920 | 1.42E-01 | 1.42E+01 |  |  |
| 8079590 | NM_004345   | CAMP      | cathelicidin antimicrobial peptide   | 0.024  | 1.017 | 8.64E-01 | 8.64E+01 |  |  |
| 8079598 | NM_016089   | ZNF589    | zinc finger protein 589              | 0.042  | 1.029 | 8.05E-01 | 8.05E+01 |  |  |
| 8079630 | NM_015933   | CCDC72    | coiled-coil domain containing 72     | -0.032 | 0.978 | 7.32E-01 | 7.32E+01 |  |  |
| 8079637 | NM_130384   | ATRIP     | ATR interacting protein              | -0.057 | 0.961 | 5.99E-01 | 5.99E+01 |  |  |
| 8079662 | NM_006321   | ARIH2     | ariadne homolog 2 (Drosophila)       | -0.033 | 0.977 | 8.05E-01 | 8.05E+01 |  |  |
| 8079677 | NM_177938   | P4HTM     | prolyl 4-hydroxylase, transmembr     | 0.001  | 1.001 | 9.94E-01 | 9.94E+01 |  |  |
| 8079693 | NM_018031   | WDR6      | WD repeat domain 6                   | 0.004  | 1.003 | 9.83E-01 | 9.83E+01 |  |  |
| 8079707 | NM_199417   | NDUFAF3   | NADH dehydrogenase (ubiquinone       | -0.049 | 0.967 | 6.99E-01 | 6.99E+01 |  |  |
| 8079733 | NM_173546   | KLHDC8B   | kelch domain containing 8B           | 0.130  | 1.094 | 2.30E-01 | 2.30E+01 |  |  |

|         |              |              |                                     |        |       |          |          |  |  |
|---------|--------------|--------------|-------------------------------------|--------|-------|----------|----------|--|--|
| 8079742 | ---          | ---          | ---                                 | 0.273  | 1.208 | 3.27E-01 | 3.27E+01 |  |  |
| 8079746 | NM_022171    | TCTA         | T-cell leukemia translocation alter | 0.008  | 1.006 | 9.58E-01 | 9.58E+01 |  |  |
| 8079753 | NM_004393    | DAG1         | dystroglycan 1 (dystrophin-associa  | 0.006  | 1.004 | 9.77E-01 | 9.77E+01 |  |  |
| 8079759 | NM_003458    | BSN          | bassoon (presynaptic cytomatrix p   | 0.029  | 1.020 | 8.64E-01 | 8.64E+01 |  |  |
| 8079772 | NM_001640    | APEH         | N-acylaminoacyl-peptide hydrolas    | 0.014  | 1.010 | 9.36E-01 | 9.36E+01 |  |  |
| 8079796 | NM_022064    | RNF123       | ring finger protein 123             | -0.019 | 0.987 | 8.98E-01 | 8.98E+01 |  |  |
| 8079842 | NM_005777    | RBM6         | RNA binding motif protein 6         | 0.005  | 1.003 | 9.78E-01 | 9.78E+01 |  |  |
| 8079867 | ---          | ---          | ---                                 | -0.085 | 0.942 | 7.45E-01 | 7.45E+01 |  |  |
| 8079869 | NM_005778    | RBM5         | RNA binding motif protein 5         | -0.021 | 0.985 | 8.68E-01 | 8.68E+01 |  |  |
| 8079896 | NM_004186    | SEMA3F       | sema domain, immunoglobulin do      | -0.021 | 0.986 | 8.75E-01 | 8.75E+01 |  |  |
| 8079919 | NM_144499    | GNAT1        | guanine nucleotide binding protei   | -0.011 | 0.992 | 9.49E-01 | 9.49E+01 |  |  |
| 8079950 | NM_002070    | GNAI2        | guanine nucleotide binding protei   | 0.007  | 1.005 | 9.86E-01 | 9.86E+01 |  |  |
| 8079964 | ---          | ---          | ---                                 | -0.066 | 0.955 | 6.67E-01 | 6.67E+01 |  |  |
| 8079988 | BC028000     | C3orf45      | chromosome 3 open reading fram      | -0.012 | 0.991 | 9.50E-01 | 9.50E+01 |  |  |
| 8079993 | NM_007022    | CYB561D2     | cytochrome b-561 domain contain     | -0.015 | 0.990 | 9.34E-01 | 9.34E+01 |  |  |
| 8080001 | NM_016173    | HEMK1        | HemK methyltransferase family m     | -0.039 | 0.973 | 7.23E-01 | 7.23E+01 |  |  |
| 8080013 | NM_004635    | MAPKAPK3     | mitogen-activated protein kinase-   | 0.021  | 1.015 | 9.49E-01 | 9.49E+01 |  |  |
| 8080084 | NM_006010    | MANF         | mesencephalic astrocyte-derived     | 0.097  | 1.069 | 4.25E-01 | 4.25E+01 |  |  |
| 8080093 | NM_013286    | RBM15B       | RNA binding motif protein 15B       | -0.050 | 0.966 | 6.95E-01 | 6.95E+01 |  |  |
| 8080100 | NM_015106    | RAD54L2      | RAD54-like 2 (S. cerevisiae)        | -0.085 | 0.943 | 3.95E-01 | 3.95E+01 |  |  |
| 8080121 | NM_015926    | TEX264       | testis expressed 264                | 0.030  | 1.021 | 8.09E-01 | 8.09E+01 |  |  |
| 8080144 | NM_00100393  | PARP3        | poly (ADP-ribose) polymerase fam    | 0.007  | 1.005 | 9.73E-01 | 9.73E+01 |  |  |
| 8080158 | NM_080865    | GPR62        | G protein-coupled receptor 62       | -0.020 | 0.986 | 8.59E-01 | 8.59E+01 |  |  |
| 8080162 | NM_015407    | ABHD14A      | abhydrolase domain containing 14    | -0.060 | 0.959 | 4.35E-01 | 4.35E+01 |  |  |
| 8080168 | NM_000666    | ACY1         | aminoacylase 1                      | 0.008  | 1.005 | 9.64E-01 | 9.64E+01 |  |  |
| 8080184 | NM_000688    | ALAS1        | aminolevulinatase, delta-, synthase | 0.090  | 1.064 | 7.12E-01 | 7.12E+01 |  |  |
| 8080198 | NM_144641    | PPM1M        | protein phosphatase 1M (PP2C do     | 0.059  | 1.042 | 6.39E-01 | 6.39E+01 |  |  |
| 8080212 | NM_145262    | GLYCTK       | glycerate kinase                    | -0.032 | 0.978 | 7.47E-01 | 7.47E+01 |  |  |
| 8080226 | NM_015512    | DNAH1        | dyein, axonemal, heavy chain 1      | -0.048 | 0.968 | 5.17E-01 | 5.17E+01 |  |  |
| 8080320 | NM_007184    | NISCH        | nischarin                           | 0.034  | 1.024 | 7.67E-01 | 7.67E+01 |  |  |
| 8080344 | NM_015136    | STAB1        | stabilin 1                          | 0.176  | 1.130 | 5.36E-02 | 5.36E+00 |  |  |
| 8080416 | NM_00112476  | LOC440957    | similar to CG32736-PA               | 0.122  | 1.088 | 3.98E-01 | 3.98E+01 |  |  |
| 8080419 | NM_206825    | GNL3         | guanine nucleotide binding protei   | -0.040 | 0.973 | 8.73E-01 | 8.73E+01 |  |  |
| 8080438 | NM_014041    | SPCS1        | signal peptidase complex subunit    | -0.002 | 0.998 | 9.87E-01 | 9.87E+01 |  |  |
| 8080466 | NM_002217    | ITI1H3       | inter-alpha (globulin) inhibitor H3 | -0.032 | 0.978 | 7.63E-01 | 7.63E+01 |  |  |
| 8080487 | NM_006254    | PRKCD        | protein kinase C, delta             | 0.051  | 1.036 | 9.04E-01 | 9.04E+01 |  |  |
| 8080619 | ---          | ---          | ---                                 | 0.061  | 1.043 | 6.35E-01 | 6.35E+01 |  |  |
| 8080621 | NR_024460    | CCDC66       | coiled-coil domain containing 66    | 0.060  | 1.042 | 7.72E-01 | 7.72E+01 |  |  |
| 8080645 | NM_012096    | APPL1        | adaptor protein, phosphotyrosine    | 0.023  | 1.016 | 8.93E-01 | 8.93E+01 |  |  |
| 8080676 | NM_177966    | PDE12        | phosphodiesterase 12                | -0.016 | 0.989 | 9.53E-01 | 9.53E+01 |  |  |
| 8080685 | NM_007159    | SLMAP        | sarcolemma associated protein       | -0.024 | 0.984 | 8.91E-01 | 8.91E+01 |  |  |
| 8080714 | NM_001457    | FLNB         | filamin B, beta                     | -0.035 | 0.976 | 8.19E-01 | 8.19E+01 |  |  |
| 8080762 | NM_020676    | ABHD6        | abhydrolase domain containing 6     | -0.008 | 0.995 | 9.81E-01 | 9.81E+01 |  |  |
| 8080773 | NM_00109878  | RPP14        | ribonuclease P/MRP 14kDa subun      | 0.083  | 1.059 | 6.87E-01 | 6.87E+01 |  |  |
| 8080781 | NM_017771    | PXK          | PX domain containing serine/thre    | 0.042  | 1.029 | 8.63E-01 | 8.63E+01 |  |  |
| 8080878 | NM_00112814  | ATXN7        | ataxin 7                            | 0.019  | 1.013 | 8.63E-01 | 8.63E+01 |  |  |
| 8080896 | NM_173471    | SLC25A26     | solute carrier family 25, member 2  | -0.112 | 0.925 | 4.81E-01 | 4.81E+01 |  |  |
| 8080909 | ---          | ---          | ---                                 | 0.005  | 1.003 | 9.88E-01 | 9.88E+01 |  |  |
| 8080911 | NM_032505    | KBTBD8       | kelch repeat and BTB (POZ) domai    | 0.077  | 1.055 | 6.58E-01 | 6.58E+01 |  |  |
| 8080923 | NM_002802    | PSMC1        | proteasome (prosome, macropain      | -0.033 | 0.978 | 8.80E-01 | 8.80E+01 |  |  |
| 8080926 | NM_006407    | ARL6IP5      | ADP-ribosylation-like factor 6 inte | 0.069  | 1.049 | 5.91E-01 | 5.91E+01 |  |  |
| 8080958 | NM_018971    | GPR27        | G protein-coupled receptor 27       | -0.020 | 0.986 | 8.98E-01 | 8.98E+01 |  |  |
| 8080960 | ---          | ---          | ---                                 | 0.043  | 1.030 | 7.95E-01 | 7.95E+01 |  |  |
| 8080973 | NM_174907    | PPP4R2       | protein phosphatase 4, regulatory   | -0.060 | 0.959 | 6.93E-01 | 6.93E+01 |  |  |
| 8080980 | AY036895     | FLJ10213     | hypothetical protein FLJ10213       | -0.065 | 0.956 | 7.35E-01 | 7.35E+01 |  |  |
| 8080991 | NM_194247    | HNRNPA3      | heterogeneous nuclear ribonucleo    | 0.035  | 1.024 | 6.17E-01 | 6.17E+01 |  |  |
| 8080998 | ENST00000455 | FRG2C        | FSDH region gene 2 family, memb     | -0.069 | 0.953 | 6.14E-01 | 6.14E+01 |  |  |
| 8081028 | ---          | ---          | ---                                 | 0.115  | 1.083 | 4.21E-02 | 4.21E+00 |  |  |
| 8081053 | ---          | ---          | ---                                 | 0.022  | 1.016 | 8.74E-01 | 8.74E+01 |  |  |
| 8081055 | NM_014043    | CHMP2B       | chromatin modifying protein 2B      | 0.064  | 1.045 | 7.05E-01 | 7.05E+01 |  |  |
| 8081069 | NM_018293    | ZNF654       | zinc finger protein 654             | -0.098 | 0.935 | 6.09E-01 | 6.09E+01 |  |  |
| 8081073 | NM_173824    | C3orf38      | chromosome 3 open reading fram      | 0.134  | 1.097 | 2.59E-01 | 2.59E+01 |  |  |
| 8081115 | NM_182896    | ARL13B       | ADP-ribosylation factor-like 13B    | -0.095 | 0.936 | 4.99E-01 | 4.99E+01 |  |  |
| 8081128 | NM_022072    | NSUN3        | NOL1/NOP2/Sun domain family, n      | 0.010  | 1.007 | 9.78E-01 | 9.78E+01 |  |  |
| 8081135 | NM_00113442  | CDV3         | CDV3 homolog (mouse)                | 0.081  | 1.058 | 3.29E-01 | 3.29E+01 |  |  |
| 8081171 | NM_153605    | CRYBG3       | beta-gamma crystallin domain cor    | 0.234  | 1.176 | 2.84E-01 | 2.84E+01 |  |  |
| 8081214 | NM_005290    | GPR15        | G protein-coupled receptor 15       | -0.389 | 0.764 | 2.19E-01 | 2.19E+01 |  |  |
| 8081241 | BC006512     | C3orf26      | chromosome 3 open reading fram      | -0.072 | 0.951 | 8.21E-01 | 8.21E+01 |  |  |
| 8081254 | ---          | ---          | ---                                 | 0.096  | 1.069 | 6.80E-01 | 6.80E+01 |  |  |
| 8081256 | NM_018309    | TBC1D23      | TBC1 domain family, member 23       | 0.062  | 1.044 | 7.83E-01 | 7.83E+01 |  |  |
| 8081277 | NM_020202    | NIT2         | nitrilase family, member 2          | 0.003  | 1.002 | 9.92E-01 | 9.92E+01 |  |  |
| 8081316 | NM_006070    | TFG          | TRK-fused gene                      | 0.016  | 1.011 | 9.42E-01 | 9.42E+01 |  |  |
| 8081335 | ENST00000426 | LOC100287852 | similar to CG5323                   | -0.099 | 0.933 | 6.88E-01 | 6.88E+01 |  |  |
| 8081337 | ---          | ---          | ---                                 | 0.008  | 1.006 | 9.86E-01 | 9.86E+01 |  |  |
| 8081343 | NM_017819    | RG9MTD1      | RNA (guanine-9-) methyltransfera    | -0.040 | 0.973 | 8.47E-01 | 8.47E+01 |  |  |
| 8081348 | NM_020357    | PCNP         | PEST proteolytic signal containing  | -0.073 | 0.951 | 5.04E-01 | 5.04E+01 |  |  |
| 8081358 | NM_014415    | ZBTB11       | zinc finger and BTB domain contai   | -0.199 | 0.871 | 2.19E-01 | 2.19E+01 |  |  |

|         |             |              |                                      |        |       |          |          |  |  |
|---------|-------------|--------------|--------------------------------------|--------|-------|----------|----------|--|--|
| 8081362 | NM_024548   | CEP97        | centrosomal protein 97kDa            | 0.019  | 1.013 | 9.46E-01 | 9.46E+01 |  |  |
| 8081375 | NM_145037   | FAM55C       | family with sequence similarity 55   | -0.058 | 0.960 | 7.87E-01 | 7.87E+01 |  |  |
| 8081386 | NM_031419   | NFKBIZ       | nuclear factor of kappa light poly   | -0.054 | 0.963 | 6.74E-01 | 6.74E+01 |  |  |
| 8081465 | NM_00114256 | BBX          | bobby sox homolog (Drosophila)       | -0.068 | 0.954 | 5.61E-01 | 5.61E+01 |  |  |
| 8081537 | NM_016388   | TRAT1        | T cell receptor associated transme   | -0.198 | 0.872 | 3.62E-01 | 3.62E+01 |  |  |
| 8081548 | NM_015480   | PVRL3        | poliovirus receptor-related 3        | -0.287 | 0.820 | 2.91E-02 | 2.91E+00 |  |  |
| 8081564 | NM_198196   | CD96         | CD96 molecule                        | -0.258 | 0.836 | 6.44E-02 | 6.44E+00 |  |  |
| 8081582 | NM_153268   | PLCXD2       | phosphatidylinositol-specific phos   | -0.142 | 0.906 | 3.97E-01 | 3.97E+01 |  |  |
| 8081590 | NM_00113443 | PHLDB2       | pleckstrin homology-like domain,     | -0.280 | 0.824 | 1.69E-01 | 1.69E+01 |  |  |
| 8081612 | NM_018394   | ABHD10       | abhydrolase domain containing 10     | 0.202  | 1.150 | 1.87E-02 | 1.87E+00 |  |  |
| 8081645 | NM_024616   | C3orf52      | chromosome 3 open reading fram       | -0.004 | 0.997 | 9.88E-01 | 9.88E+01 |  |  |
| 8081657 | NM_00100419 | CD200        | CD200 molecule                       | -0.167 | 0.891 | 4.32E-01 | 4.32E+01 |  |  |
| 8081686 | NM_033254   | BOC          | Boc homolog (mouse)                  | 0.025  | 1.017 | 8.55E-01 | 8.55E+01 |  |  |
| 8081710 | NM_017699   | SIDT1        | SID1 transmembrane family, mem       | -0.015 | 0.989 | 9.61E-01 | 9.61E+01 |  |  |
| 8081758 | NM_017577   | GRAMD1C      | GRAM domain containing 1C            | 0.217  | 1.162 | 3.70E-01 | 3.70E+01 |  |  |
| 8081779 | NM_173570   | ZDHHC23      | zinc finger, DHHC-type containi      | -0.021 | 0.986 | 9.12E-01 | 9.12E+01 |  |  |
| 8081799 | NM_173799   | TIGIT        | T cell immunoreceptor with Ig and    | -0.034 | 0.977 | 9.29E-01 | 9.29E+01 |  |  |
| 8081818 | ---         | ---          | ---                                  | -0.073 | 0.951 | 5.77E-01 | 5.77E+01 |  |  |
| 8081820 | ---         | ---          | ---                                  | 0.069  | 1.049 | 6.87E-01 | 6.87E+01 |  |  |
| 8081838 | NM_020754   | CDGAP        | Cdc42 GTPase-activating protein      | 0.256  | 1.194 | 2.61E-01 | 2.61E+01 |  |  |
| 8081945 | NM_004547   | NDUFB4       | NADH dehydrogenase (ubiquinone       | -0.050 | 0.966 | 7.45E-01 | 7.45E+01 |  |  |
| 8081953 | NM_005513   | GTF2E1       | general transcription factor IIE, po | 0.063  | 1.045 | 7.72E-01 | 7.72E+01 |  |  |
| 8082058 | NM_005213   | CSTA         | cystatin A (stefin A)                | -0.078 | 0.947 | 8.35E-01 | 8.35E+01 |  |  |
| 8082066 | NM_014367   | FAM162A      | family with sequence similarity 16   | -0.022 | 0.985 | 9.35E-01 | 9.35E+01 |  |  |
| 8082075 | NM_138287   | DTX3L        | deltex 3-like (Drosophila)           | 0.158  | 1.115 | 4.96E-01 | 4.96E+01 |  |  |
| 8082086 | NM_00111352 | PARP15       | poly (ADP-ribose) polymerase fam     | -0.065 | 0.956 | 7.53E-01 | 7.53E+01 |  |  |
| 8082100 | NM_017554   | PARP14       | poly (ADP-ribose) polymerase fam     | 0.222  | 1.167 | 1.76E-01 | 1.76E+01 |  |  |
| 8082118 | ---         | ---          | ---                                  | -0.014 | 0.990 | 9.80E-01 | 9.80E+01 |  |  |
| 8082120 | NM_032839   | DIRC2        | disrupted in renal carcinoma 2       | -0.037 | 0.974 | 8.93E-01 | 8.93E+01 |  |  |
| 8082133 | NM_006810   | PDIAS        | protein disulfide isomerase family   | 0.092  | 1.066 | 5.43E-01 | 5.43E+01 |  |  |
| 8082163 | ---         | ---          | ---                                  | -0.037 | 0.975 | 8.06E-01 | 8.06E+01 |  |  |
| 8082165 | NM_00102466 | KALRN        | kalirin, RhoGEF kinase               | 0.008  | 1.006 | 9.42E-01 | 9.42E+01 |  |  |
| 8082229 | NM_000373   | UMPS         | uridine monophosphate synthetas      | -0.046 | 0.968 | 8.10E-01 | 8.10E+01 |  |  |
| 8082244 | NR_002822   | MGC72080     | MGC72080 pseudogene                  | -0.008 | 0.994 | 9.80E-01 | 9.80E+01 |  |  |
| 8082246 | ---         | ---          | ---                                  | -0.011 | 0.993 | 9.53E-01 | 9.53E+01 |  |  |
| 8082248 | NR_002822   | MGC72080     | MGC72080 pseudogene                  | -0.016 | 0.989 | 9.63E-01 | 9.63E+01 |  |  |
| 8082250 | ---         | ---          | ---                                  | 0.024  | 1.017 | 9.27E-01 | 9.27E+01 |  |  |
| 8082252 | ---         | ---          | ---                                  | -0.098 | 0.934 | 6.77E-01 | 6.77E+01 |  |  |
| 8082254 | NR_024251   | LOC100125556 | family with sequence similarity 86   | -0.068 | 0.954 | 5.82E-01 | 5.82E+01 |  |  |
| 8082289 | NM_152889   | CHST13       | carbohydrate (chondroitin 4) sulf    | -0.056 | 0.962 | 6.06E-01 | 6.06E+01 |  |  |
| 8082305 | NM_032343   | CHCHD6       | coiled-coil-helix-coiled-coil-hel    | -0.013 | 0.991 | 9.56E-01 | 9.56E+01 |  |  |
| 8082314 | NM_032242   | PLXNA1       | plexin A1                            | 0.037  | 1.026 | 7.73E-01 | 7.73E+01 |  |  |
| 8082350 | NM_004526   | MCM2         | minichromosome maintenance co        | -0.049 | 0.967 | 7.25E-01 | 7.25E+01 |  |  |
| 8082368 | NM_015720   | PODXL2       | podocalyxin-like 2                   | -0.047 | 0.968 | 5.76E-01 | 5.76E+01 |  |  |
| 8082380 | NM_172027   | ABTB1        | ankyrin repeat and BTB (POZ) dom     | -0.011 | 0.992 | 9.33E-01 | 9.33E+01 |  |  |
| 8082406 | ---         | ---          | ---                                  | 0.072  | 1.051 | 6.76E-01 | 6.76E+01 |  |  |
| 8082408 | NM_013336   | SEC61A1      | Sec61 alpha 1 subunit (S. cerevisia  | 0.177  | 1.130 | 2.33E-01 | 2.33E+01 |  |  |
| 8082422 | NM_021937   | EEFSEC       | eukaryotic elongation factor, sele   | -0.014 | 0.990 | 9.01E-01 | 9.01E+01 |  |  |
| 8082431 | NM_004637   | RAB7A        | RAB7A, member RAS oncogene fa        | 0.096  | 1.068 | 5.16E-01 | 5.16E+01 |  |  |
| 8082442 | ---         | ---          | ---                                  | 0.148  | 1.108 | 6.10E-01 | 6.10E+01 |  |  |
| 8082444 | NM_014049   | ACAD9        | acyl-Coenzyme A dehydrogenase 9      | -0.011 | 0.992 | 9.70E-01 | 9.70E+01 |  |  |
| 8082465 | NM_024768   | CCDC48       | coiled-coil domain containing 48     | -0.058 | 0.961 | 5.37E-01 | 5.37E+01 |  |  |
| 8082473 | NM_000174   | GP9          | glycoprotein IX (platelet)           | -0.056 | 0.962 | 6.21E-01 | 6.21E+01 |  |  |
| 8082478 | NM_016128   | COPG         | coatamer protein complex, subun      | 0.003  | 1.002 | 9.90E-01 | 9.90E+01 |  |  |
| 8082504 | NM_00100610 | C3orf37      | chromosome 3 open reading fram       | -0.076 | 0.949 | 6.16E-01 | 6.16E+01 |  |  |
| 8082517 | NR_026991   | C3orf47      | chromosome 3 open reading fram       | 0.041  | 1.029 | 8.03E-01 | 8.03E+01 |  |  |
| 8082523 | NM_052985   | IFT122       | intraflagellar transport 122 homol   | 0.133  | 1.097 | 2.93E-01 | 2.93E+01 |  |  |
| 8082560 | NM_153833   | H1FOO        | H1 histone family, member O, ood     | -0.022 | 0.985 | 8.93E-01 | 8.93E+01 |  |  |
| 8082570 | ---         | ---          | ---                                  | 0.342  | 1.267 | 2.63E-01 | 2.63E+01 |  |  |
| 8082574 | NM_007117   | TRH          | thyrotropin-releasing hormone        | 0.037  | 1.026 | 7.85E-01 | 7.85E+01 |  |  |
| 8082605 | ---         | ---          | ---                                  | -0.040 | 0.973 | 8.27E-01 | 8.27E+01 |  |  |
| 8082607 | NM_014382   | ATP2C1       | ATPase, Ca++ transporting, type 2    | 0.027  | 1.019 | 8.87E-01 | 8.87E+01 |  |  |
| 8082663 | NR_027766   | NUDT16P      | nudix (nucleoside diphosphate lin    | -0.051 | 0.965 | 6.30E-01 | 6.30E+01 |  |  |
| 8082667 | NM_152395   | NUDT16       | nudix (nucleoside diphosphate lin    | 0.029  | 1.020 | 8.69E-01 | 8.69E+01 |  |  |
| 8082688 | NM_015268   | DNAJC13      | DnaJ (Hsp40) homolog, subfamily      | 0.173  | 1.127 | 5.46E-02 | 5.46E+00 |  |  |
| 8082750 | NM_024818   | UBA5         | ubiquitin-like modifier activating e | -0.034 | 0.977 | 8.74E-01 | 8.74E+01 |  |  |
| 8082774 | NM_003571   | BFSP2        | beaded filament structural protein   | 0.001  | 1.001 | 9.95E-01 | 9.95E+01 |  |  |
| 8082788 | NM_00113442 | CDV3         | CDV3 homolog (mouse)                 | 0.038  | 1.027 | 6.58E-01 | 6.58E+01 |  |  |
| 8082816 | NM_021203   | SRPRB        | signal recognition particle recepto  | 0.051  | 1.036 | 7.97E-01 | 7.97E+01 |  |  |
| 8082827 | NM_025180   | CEP63        | centrosomal protein 63kDa            | 0.091  | 1.065 | 4.81E-01 | 4.81E+01 |  |  |
| 8082886 | NM_000532   | PCCB         | propionyl Coenzyme A carboxylase     | 0.030  | 1.021 | 8.63E-01 | 8.63E+01 |  |  |
| 8082905 | NM_025246   | TMEM22       | transmembrane protein 22             | 0.041  | 1.029 | 7.09E-01 | 7.09E+01 |  |  |
| 8082911 | NM_006153   | NCK1         | NCK adaptor protein 1                | 0.144  | 1.105 | 1.40E-01 | 1.40E+01 |  |  |
| 8082916 | NM_144717   | IL20RB       | interleukin 20 receptor beta         | 0.106  | 1.076 | 5.61E-01 | 5.61E+01 |  |  |
| 8082940 | NM_015396   | ARMC8        | armadillo repeat containing 8        | 0.053  | 1.038 | 7.35E-01 | 7.35E+01 |  |  |
| 8083000 | NM_00103303 | FAIM         | Fas apoptotic inhibitory molecule    | -0.037 | 0.975 | 8.83E-01 | 8.83E+01 |  |  |
| 8083011 | NM_020191   | MRPS22       | mitochondrial ribosomal protein S    | -0.008 | 0.994 | 9.65E-01 | 9.65E+01 |  |  |



|         |              |           |                                      |        |       |          |          |  |  |
|---------|--------------|-----------|--------------------------------------|--------|-------|----------|----------|--|--|
| 8083030 | ---          | ---       | ---                                  | 0.075  | 1.053 | 6.11E-01 | 6.11E+01 |  |  |
| 8083032 | ---          | ---       | ---                                  | 0.051  | 1.036 | 7.39E-01 | 7.39E+01 |  |  |
| 8083034 | NM_022131    | CLSTN2    | calsynenin 2                         | -0.056 | 0.962 | 5.91E-01 | 5.91E+01 |  |  |
| 8083063 | NM_00110464  | SLC25A36  | solute carrier family 25, member 3   | 0.021  | 1.014 | 9.43E-01 | 9.43E+01 |  |  |
| 8083071 | NM_080862    | SPSB4     | splA/ryanodine receptor domain a     | -0.068 | 0.954 | 5.64E-01 | 5.64E+01 |  |  |
| 8083075 | NM_152282    | ACPL2     | acid phosphatase-like 2              | -0.074 | 0.950 | 5.97E-01 | 5.97E+01 |  |  |
| 8083090 | NM_00108041  | ZBTB38    | zinc finger and BTB domain containi  | -0.041 | 0.972 | 8.67E-01 | 8.67E+01 |  |  |
| 8083092 | NM_00108041  | ZBTB38    | zinc finger and BTB domain containi  | -0.043 | 0.970 | 8.61E-01 | 8.61E+01 |  |  |
| 8083094 | NM_006506    | RASA2     | RAS p21 protein activator 2          | 0.042  | 1.029 | 8.31E-01 | 8.31E+01 |  |  |
| 8083119 | NM_014245    | RNF7      | ring finger protein 7                | -0.018 | 0.988 | 9.34E-01 | 9.34E+01 |  |  |
| 8083136 | NM_001679    | ATP1B3    | ATPase, Na+/K+ transporting, beta    | 0.085  | 1.061 | 7.61E-01 | 7.61E+01 |  |  |
| 8083144 | ---          | ---       | ---                                  | 0.210  | 1.156 | 6.51E-01 | 6.51E+01 |  |  |
| 8083164 | ---          | ---       | ---                                  | 0.005  | 1.003 | 9.83E-01 | 9.83E+01 |  |  |
| 8083183 | NM_00108041  | SR140     | U2-associated SR140 protein          | 0.040  | 1.028 | 6.87E-01 | 6.87E+01 |  |  |
| 8083214 | NM_004267    | CHST2     | carbohydrate (N-acetylglucosamin     | -0.008 | 0.995 | 9.53E-01 | 9.53E+01 |  |  |
| 8083221 | NM_002586    | PBX2      | pre-B-cell leukemia homeobox 2       | 0.004  | 1.003 | 9.85E-01 | 9.85E+01 |  |  |
| 8083223 | NM_173552    | C3orf58   | chromosome 3 open reading fram       | 0.149  | 1.109 | 2.27E-01 | 2.27E+01 |  |  |
| 8083272 | NM_004130    | GYG1      | glycogenin 1                         | 0.250  | 1.190 | 7.89E-02 | 7.89E+00 |  |  |
| 8083282 | NM_032383    | HP53      | Hermansky-Pudlak syndrome 3          | 0.105  | 1.075 | 5.77E-01 | 5.77E+01 |  |  |
| 8083310 | NM_007282    | RNF13     | ring finger protein 13               | 0.142  | 1.103 | 5.81E-01 | 5.81E+01 |  |  |
| 8083324 | NM_014779    | TSC22D2   | TSC22 domain family, member 2        | -0.074 | 0.950 | 4.31E-01 | 4.31E+01 |  |  |
| 8083333 | NM_032025    | EIF2A     | eukaryotic translation initiation fa | 0.076  | 1.054 | 3.52E-01 | 3.52E+01 |  |  |
| 8083352 | NM_016275    | SELT      | selenoprotein T                      | 0.077  | 1.055 | 4.24E-01 | 4.24E+01 |  |  |
| 8083429 | NM_021038    | MBNL1     | muscleblind-like (Drosophila)        | 0.080  | 1.057 | 2.25E-01 | 2.25E+01 |  |  |
| 8083445 | ---          | ---       | ---                                  | 0.083  | 1.059 | 7.16E-01 | 7.16E+01 |  |  |
| 8083457 | NM_002886    | RAP2B     | RAP2B, member of RAS oncogene        | 0.254  | 1.193 | 2.25E-03 | 2.25E-01 |  |  |
| 8083469 | ---          | ---       | ---                                  | 0.001  | 1.000 | 9.99E-01 | 9.99E+01 |  |  |
| 8083523 | NM_003875    | GMPS      | guanine monophosphate synthetas      | 0.069  | 1.049 | 4.85E-01 | 4.85E+01 |  |  |
| 8083546 | NM_003471    | KCNAB1    | potassium voltage-gated channel,     | -0.039 | 0.973 | 7.03E-01 | 7.03E+01 |  |  |
| 8083592 | ---          | ---       | ---                                  | 0.160  | 1.117 | 3.95E-01 | 3.95E+01 |  |  |
| 8083605 | NM_016625    | RSRC1     | arginine/serine-rich coiled-coil 1   | 0.095  | 1.068 | 4.83E-01 | 4.83E+01 |  |  |
| 8083630 | NM_024996    | GFM1      | G elongation factor, mitochondria    | 0.189  | 1.140 | 2.19E-02 | 2.19E+00 |  |  |
| 8083704 | NM_013263    | BRD7      | bromodomain containing 7             | 0.033  | 1.023 | 8.78E-01 | 8.78E+01 |  |  |
| 8083709 | NM_005496    | SMC4      | structural maintenance of chromo     | 0.000  | 1.000 | 1.00E+00 | 1.00E+02 |  |  |
| 8083749 | NM_139245    | PPM1L     | protein phosphatase 1 (formerly 2    | -0.042 | 0.971 | 8.72E-01 | 8.72E+01 |  |  |
| 8083757 | NM_015938    | NMD3      | NMD3 homolog (S. cerevisiae)         | 0.118  | 1.085 | 3.51E-01 | 3.51E+01 |  |  |
| 8083775 | ---          | ---       | ---                                  | 0.000  | 1.000 | 1.00E+00 | 1.00E+02 |  |  |
| 8083777 | ENST00000407 | LOC131055 | peptidylprolyl isomerase A pseudo    | 0.009  | 1.006 | 9.65E-01 | 9.65E+01 |  |  |
| 8083792 | ---          | ---       | ---                                  | 0.043  | 1.031 | 7.09E-01 | 7.09E+01 |  |  |
| 8083794 | NM_018657    | MYNN      | myoneurin                            | -0.086 | 0.942 | 5.25E-01 | 5.25E+01 |  |  |
| 8083826 | NM_003262    | SEC62     | SEC62 homolog (S. cerevisiae)        | -0.019 | 0.987 | 9.09E-01 | 9.09E+01 |  |  |
| 8083850 | ---          | ---       | ---                                  | 0.052  | 1.037 | 8.04E-01 | 8.04E+01 |  |  |
| 8083854 | NM_002740    | PRKCI     | protein kinase C, iota               | -0.112 | 0.925 | 3.45E-01 | 3.45E+01 |  |  |
| 8083876 | NM_005414    | SKIL      | SKI-like oncogene                    | -0.174 | 0.887 | 6.20E-02 | 6.20E+00 |  |  |
| 8083887 | NM_005602    | CLDN11    | claudin 11                           | -0.096 | 0.935 | 3.69E-01 | 3.69E+01 |  |  |
| 8083893 | ---          | ---       | ---                                  | 0.014  | 1.010 | 9.71E-01 | 9.71E+01 |  |  |
| 8083901 | NM_022763    | FNDC3B    | fibronectin type III domain contain  | -0.292 | 0.817 | 3.83E-01 | 3.83E+01 |  |  |
| 8083933 | ---          | ---       | ---                                  | -0.057 | 0.961 | 8.56E-01 | 8.56E+01 |  |  |
| 8084012 | ---          | ---       | ---                                  | 0.050  | 1.035 | 7.44E-01 | 7.44E+01 |  |  |
| 8084016 | NM_006218    | PIK3CA    | phosphoinositide-3-kinase, catalyt   | 0.021  | 1.015 | 9.16E-01 | 9.16E+01 |  |  |
| 8084035 | NM_016331    | ZNF639    | zinc finger protein 639              | -0.014 | 0.990 | 9.49E-01 | 9.49E+01 |  |  |
| 8084045 | NM_033540    | MFN1      | mitofusin 1                          | 0.049  | 1.034 | 6.59E-01 | 6.59E+01 |  |  |
| 8084064 | NM_006636    | MTHFD2    | methylenetetrahydrofolate dehyd      | 0.211  | 1.157 | 3.30E-01 | 3.30E+01 |  |  |
| 8084067 | NM_178042    | ACTL6A    | actin-like 6A                        | -0.034 | 0.977 | 8.40E-01 | 8.40E+01 |  |  |
| 8084092 | NM_002492    | NDUFB5    | NADH dehydrogenase (ubiquinone       | 0.084  | 1.060 | 5.15E-01 | 5.15E+01 |  |  |
| 8084122 | ---          | ---       | ---                                  | -0.024 | 0.984 | 9.13E-01 | 9.13E+01 |  |  |
| 8084128 | NM_133462    | TTC14     | tetratricopeptide repeat domain 1    | 0.041  | 1.029 | 7.51E-01 | 7.51E+01 |  |  |
| 8084146 | NM_00101343  | FXR1      | fragile X mental retardation, autos  | -0.044 | 0.970 | 6.25E-01 | 6.25E+01 |  |  |
| 8084173 | NM_014616    | ATP11B    | ATPase, class VI, type 11B           | -0.015 | 0.990 | 9.44E-01 | 9.44E+01 |  |  |
| 8084206 | NM_032047    | B3GNT5    | UDP-GlcNAc:betaGal beta-1,3-N-a      | 0.632  | 1.550 | 8.11E-02 | 8.11E+00 |  |  |
| 8084213 | ---          | ---       | ---                                  | 0.088  | 1.063 | 8.19E-01 | 8.19E+01 |  |  |
| 8084215 | ---          | ---       | ---                                  | 0.010  | 1.007 | 9.70E-01 | 9.70E+01 |  |  |
| 8084219 | NM_017644    | KLHL24    | kelch-like 24 (Drosophila)           | 0.004  | 1.003 | 9.86E-01 | 9.86E+01 |  |  |
| 8084232 | NM_018023    | YEATS2    | YEATS domain containing 2            | 0.067  | 1.047 | 5.55E-01 | 5.55E+01 |  |  |
| 8084266 | NM_182537    | HTR3D     | 5-hydroxytryptamine (serotonin) r    | -0.008 | 0.994 | 9.64E-01 | 9.64E+01 |  |  |
| 8084303 | NM_003907    | EIF2B5    | eukaryotic translation initiation fa | -0.011 | 0.993 | 9.64E-01 | 9.64E+01 |  |  |
| 8084323 | NM_004423    | DVL3      | dishevelled, dsh homolog 3 (Dros     | -0.132 | 0.913 | 4.71E-02 | 4.71E+00 |  |  |
| 8084345 | NM_004068    | AP2M1     | adaptor-related protein complex 2    | 0.068  | 1.048 | 6.40E-01 | 6.40E+01 |  |  |
| 8084360 | NM_018358    | ABCF3     | ATP-binding cassette, sub-family F   | -0.008 | 0.995 | 9.63E-01 | 9.63E+01 |  |  |
| 8084382 | NM_138345    | VWASB2    | von Willebrand factor A domain co    | -0.025 | 0.983 | 8.66E-01 | 8.66E+01 |  |  |
| 8084397 | NM_014693    | ECE2      | endothelin converting enzyme 2       | 0.001  | 1.001 | 9.92E-01 | 9.92E+01 |  |  |
| 8084423 | NM_002808    | PSMD2     | proteasome (prosome, macropain       | -0.012 | 0.991 | 9.64E-01 | 9.64E+01 |  |  |
| 8084439 | NM_182917    | EIF4G1    | eukaryotic translation initiation fa | 0.006  | 1.004 | 9.70E-01 | 9.70E+01 |  |  |
| 8084478 | BC037299     | FAM131A   | family with sequence similarity 13   | 0.008  | 1.005 | 9.77E-01 | 9.77E+01 |  |  |
| 8084488 | NM_006232    | POLR2H    | polymerase (RNA) II (DNA directe     | 0.030  | 1.021 | 8.47E-01 | 8.47E+01 |  |  |
| 8084496 | NM_003741    | CHRD      | chordin                              | -0.047 | 0.968 | 6.97E-01 | 6.97E+01 |  |  |
| 8084524 | NM_004443    | EPHB3     | EPH receptor B3                      | -0.019 | 0.987 | 9.04E-01 | 9.04E+01 |  |  |

|         |             |              |                                                        |        |       |          |          |  |  |
|---------|-------------|--------------|--------------------------------------------------------|--------|-------|----------|----------|--|--|
| 8084541 | NM_00100992 | VPS8         | vacuolar protein sorting 8 homolog                     | 0.061  | 1.043 | 7.70E-01 | 7.70E+01 |  |  |
| 8084607 | NM_021627   | SEN2         | SUMO1/sentrin/SMT3 specific peptidase                  | -0.046 | 0.968 | 7.91E-01 | 7.91E+01 |  |  |
| 8084630 | ---         | ---          | ---                                                    | -0.265 | 0.832 | 3.29E-01 | 3.29E+01 |  |  |
| 8084634 | NM_016306   | DNAJB11      | DnaJ (Hsp40) homolog, subfamily 11                     | 0.230  | 1.173 | 3.53E-02 | 3.53E+00 |  |  |
| 8084694 | NM_001967   | EIF4A2       | eukaryotic translation initiation factor 4A2           | -0.018 | 0.987 | 8.78E-01 | 8.78E+01 |  |  |
| 8084704 | AB209021    | EIF4A2       | eukaryotic translation initiation factor 4A2           | -0.076 | 0.949 | 8.32E-01 | 8.32E+01 |  |  |
| 8084708 | NR_002588   | SNORA4       | small nucleolar RNA, H/ACA box 4                       | -0.114 | 0.924 | 6.76E-01 | 6.76E+01 |  |  |
| 8084715 | ---         | ---          | ---                                                    | -0.039 | 0.973 | 8.31E-01 | 8.31E+01 |  |  |
| 8084717 | NM_173216   | ST6GAL1      | ST6 beta-galactosamide alpha-2,6-galactosyltransferase | 0.124  | 1.090 | 2.79E-01 | 2.79E+01 |  |  |
| 8084726 | NM_153708   | RTP1         | receptor (chemosensory) transporter                    | 0.028  | 1.020 | 8.48E-01 | 8.48E+01 |  |  |
| 8084732 | NM_022147   | RTP4         | receptor (chemosensory) transporter                    | 0.130  | 1.095 | 6.71E-01 | 6.71E+01 |  |  |
| 8084739 | NR_024413   | FLJ42393     | hypothetical LOC401105                                 | -0.107 | 0.928 | 4.45E-01 | 4.45E+01 |  |  |
| 8084742 | NM_005578   | LPP          | LIM domain containing preferred protein                | 0.109  | 1.078 | 5.89E-01 | 5.89E+01 |  |  |
| 8084757 | NM_198485   | TPRG1        | tumor protein p63 regulated 1                          | 0.172  | 1.127 | 4.35E-01 | 4.35E+01 |  |  |
| 8084794 | NM_002182   | IL1RAP       | interleukin 1 receptor accessory protein               | -0.254 | 0.838 | 1.04E-01 | 1.04E+01 |  |  |
| 8084818 | NM_178335   | CCDC50       | coiled-coil domain containing 50                       | 0.025  | 1.017 | 9.22E-01 | 9.22E+01 |  |  |
| 8084844 | NM_130837   | OPA1         | optic atrophy 1 (autosomal dominant)                   | 0.032  | 1.022 | 8.46E-01 | 8.46E+01 |  |  |
| 8084878 | ---         | ---          | ---                                                    | 0.121  | 1.087 | 8.16E-01 | 8.16E+01 |  |  |
| 8084880 | NM_005524   | HES1         | hairy and enhancer of split 1, Drosophila              | -0.154 | 0.899 | 3.56E-02 | 3.56E+00 |  |  |
| 8084887 | ---         | ---          | ---                                                    | 0.041  | 1.029 | 7.09E-01 | 7.09E+01 |  |  |
| 8084891 | NM_153690   | FAM43A       | family with sequence similarity 43 member A            | -0.013 | 0.991 | 9.36E-01 | 9.36E+01 |  |  |
| 8084895 | NM_152673   | MUC20        | mucin 20, cell surface associated                      | -0.002 | 0.999 | 9.94E-01 | 9.94E+01 |  |  |
| 8084904 | NR_003265   | SDHALP2      | succinate dehydrogenase complex subunit                | -0.095 | 0.936 | 5.79E-01 | 5.79E+01 |  |  |
| 8084912 | NR_003265   | SDHALP2      | succinate dehydrogenase complex subunit                | -0.012 | 0.992 | 9.64E-01 | 9.64E+01 |  |  |
| 8084917 | AK128346    | LOC440993    | hypothetical LOC440993                                 | 0.008  | 1.006 | 9.85E-01 | 9.85E+01 |  |  |
| 8084921 | AK094115    | LOC100128262 | hypothetical LOC100128262                              | -0.048 | 0.968 | 8.09E-01 | 8.09E+01 |  |  |
| 8084929 | NM_152672   | OSTalpha     | organic solute transporter alpha                       | -0.063 | 0.957 | 5.82E-01 | 5.82E+01 |  |  |
| 8084945 | ---         | ---          | ---                                                    | 0.017  | 1.012 | 9.50E-01 | 9.50E+01 |  |  |
| 8084947 | NM_00110557 | FBXO45       | F-box protein 45                                       | 0.137  | 1.099 | 3.66E-01 | 3.66E+01 |  |  |
| 8084951 | NM_198565   | LRRC33       | leucine rich repeat containing 33                      | 0.077  | 1.055 | 5.47E-01 | 5.47E+01 |  |  |
| 8084963 | NM_002577   | PAK2         | p21 protein (Cdc42/Rac)-activated kinase               | 0.103  | 1.074 | 3.62E-01 | 3.62E+01 |  |  |
| 8084971 | NM_152699   | SEN5         | SUMO1/sentrin specific peptidase                       | -0.058 | 0.960 | 7.15E-01 | 7.15E+01 |  |  |
| 8084982 | NR_024388   | LOC152217    | hypothetical LOC152217                                 | 0.089  | 1.063 | 5.81E-01 | 5.81E+01 |  |  |
| 8084986 | NM_032288   | FYTTD1       | forty-two-three domain containing                      | -0.005 | 0.996 | 9.74E-01 | 9.74E+01 |  |  |
| 8085000 | NM_032773   | LRCH3        | leucine-rich repeats and calponin                      | -0.069 | 0.954 | 3.93E-01 | 3.93E+01 |  |  |
| 8085026 | NM_000996   | RPL35A       | ribosomal protein L35a                                 | -0.005 | 0.996 | 9.64E-01 | 9.64E+01 |  |  |
| 8085052 | ---         | ---          | ---                                                    | 0.024  | 1.017 | 9.63E-01 | 9.63E+01 |  |  |
| 8085054 | NM_207366   | 40A35        | septin 14                                              | -0.030 | 0.979 | 9.19E-01 | 9.19E+01 |  |  |
| 8085058 | ---         | ---          | ---                                                    | -0.010 | 0.993 | 9.68E-01 | 9.68E+01 |  |  |
| 8085081 | NM_016302   | CRBN         | cereblon                                               | 0.016  | 1.011 | 9.33E-01 | 9.33E+01 |  |  |
| 8085094 | NM_182760   | SUMF1        | sulfatase modifying factor 1                           | 0.162  | 1.119 | 1.09E-01 | 1.09E+01 |  |  |
| 8085112 | ---         | ---          | ---                                                    | -0.083 | 0.944 | 7.89E-01 | 7.89E+01 |  |  |
| 8085122 | AB024705    | C3orf32      | chromosome 3 open reading frame                        | -0.062 | 0.958 | 4.54E-01 | 4.54E+01 |  |  |
| 8085138 | NM_000916   | OXTR         | oxytocin receptor                                      | -0.085 | 0.943 | 2.82E-01 | 2.82E+01 |  |  |
| 8085145 | NM_020165   | RAD18        | RAD18 homolog (S. cerevisiae)                          | 0.006  | 1.004 | 9.85E-01 | 9.85E+01 |  |  |
| 8085195 | NM_198560   | LHFPL4       | lipoma HMGIC fusion partner-like                       | -0.020 | 0.986 | 8.76E-01 | 8.76E+01 |  |  |
| 8085206 | NM_003656   | CAMK1        | calcium/calmodulin-dependent protein kinase            | 0.212  | 1.158 | 2.75E-02 | 2.75E+00 |  |  |
| 8085220 | NM_133480   | TADA3L       | transcriptional adaptor 3 (NGG1 homolog)               | 0.026  | 1.018 | 8.84E-01 | 8.84E+01 |  |  |
| 8085233 | NM_173659   | RPUSD3       | RNA pseudouridylation synthase domain                  | -0.043 | 0.971 | 7.26E-01 | 7.26E+01 |  |  |
| 8085244 | NM_022094   | CIDEA        | cell death-inducing DFFA-like effector                 | -0.049 | 0.967 | 7.43E-01 | 7.43E+01 |  |  |
| 8085263 | NM_018447   | TMEM111      | transmembrane protein 111                              | -0.057 | 0.961 | 8.10E-01 | 8.10E+01 |  |  |
| 8085272 | AK022260    | LOC401052    | hypothetical LOC401052                                 | -0.018 | 0.987 | 9.20E-01 | 9.20E+01 |  |  |
| 8085276 | NR_002786   | CIDECP       | cell death-inducing DFFA-like effector                 | -0.131 | 0.913 | 3.49E-01 | 3.49E+01 |  |  |
| 8085283 | NM_173472   | C3orf24      | chromosome 3 open reading frame                        | 0.045  | 1.032 | 7.45E-01 | 7.45E+01 |  |  |
| 8085287 | NM_018462   | C3orf10      | chromosome 3 open reading frame                        | -0.019 | 0.987 | 9.41E-01 | 9.41E+01 |  |  |
| 8085293 | NR_024138   | GHRL         | ghrelin/obestatin prepropeptide                        | -0.055 | 0.963 | 6.67E-01 | 6.67E+01 |  |  |
| 8085300 | NR_024272   | SEC13        | SEC13 homolog (S. cerevisiae)                          | 0.069  | 1.049 | 6.78E-01 | 6.78E+01 |  |  |
| 8085311 | NM_00100133 | ATP2B2       | ATPase, Ca++ transporting, plasma membrane             | -0.051 | 0.965 | 7.04E-01 | 7.04E+01 |  |  |
| 8085340 | NM_014667   | VGLL4        | vestigial like 4 (Drosophila)                          | 0.074  | 1.053 | 5.52E-01 | 5.52E+01 |  |  |
| 8085350 | NM_138807   | C3orf31      | chromosome 3 open reading frame                        | 0.044  | 1.031 | 8.36E-01 | 8.36E+01 |  |  |
| 8085358 | ---         | ---          | ---                                                    | -0.059 | 0.960 | 7.64E-01 | 7.64E+01 |  |  |
| 8085360 | NM_003256   | TIMP4        | TIMP metalloproteinase inhibitor 4                     | 0.032  | 1.022 | 7.96E-01 | 7.96E+01 |  |  |
| 8085370 | NR_003112   | GSTM1L       | glutathione S-transferase mu 1-like                    | 0.002  | 1.001 | 9.94E-01 | 9.94E+01 |  |  |
| 8085372 | ---         | ---          | ---                                                    | 0.081  | 1.058 | 8.85E-01 | 8.85E+01 |  |  |
| 8085374 | NM_002880   | RAF1         | v-raf-1 murine leukemia viral oncogene                 | 0.026  | 1.018 | 8.33E-01 | 8.33E+01 |  |  |
| 8085393 | NM_018306   | TMEM40       | transmembrane protein 40                               | -0.028 | 0.981 | 8.52E-01 | 8.52E+01 |  |  |
| 8085407 | NM_00100707 | RPL32        | ribosomal protein L32                                  | -0.084 | 0.944 | 5.41E-01 | 5.41E+01 |  |  |
| 8085412 | NM_00113438 | IQSEC1       | IQ motif and Sec7 domain 1                             | 0.134  | 1.097 | 9.03E-02 | 9.03E+00 |  |  |
| 8085429 | AY358240    | UNQ6487      | LMNE6487                                               | -0.017 | 0.988 | 9.53E-01 | 9.53E+01 |  |  |
| 8085431 | NM_024923   | NUP210       | nucleoporin 210kDa                                     | -0.017 | 0.988 | 9.23E-01 | 9.23E+01 |  |  |
| 8085475 | NM_004625   | WNT7A        | wingless-type MMTV integration site                    | -0.055 | 0.962 | 6.52E-01 | 6.52E+01 |  |  |
| 8085481 | NM_144636   | CHCHD4       | coiled-coil-helix-coiled-coil-helix domain             | -0.004 | 0.997 | 9.88E-01 | 9.88E+01 |  |  |
| 8085486 | NM_004628   | XPC          | xeroderma pigmentosum, complementation group C         | -0.072 | 0.951 | 5.25E-01 | 5.25E+01 |  |  |
| 8085504 | NM_00108042 | GRIP2        | glutamate receptor interacting protein                 | 0.000  | 1.000 | 1.00E+00 | 1.00E+02 |  |  |
| 8085531 | NM_022497   | MRP525       | mitochondrial ribosomal protein S25                    | 0.074  | 1.052 | 5.03E-01 | 5.03E+01 |  |  |
| 8085537 | NM_022340   | ZFYVE20      | zinc finger, FYVE domain containing                    | 0.136  | 1.099 | 4.59E-01 | 4.59E+01 |  |  |
| 8085554 | ---         | ---          | ---                                                    | -0.024 | 0.984 | 9.33E-01 | 9.33E+01 |  |  |

|         |             |           |                                       |        |       |          |          |  |  |
|---------|-------------|-----------|---------------------------------------|--------|-------|----------|----------|--|--|
| 8085556 | NM_004844   | SH3BP5    | SH3-domain binding protein 5 (BT      | -0.159 | 0.896 | 1.72E-01 | 1.72E+01 |  |  |
| 8085579 | ---         | ---       | ---                                   | 0.229  | 1.172 | 8.37E-01 | 8.37E+01 |  |  |
| 8085581 | NM_005677   | COLQ      | collagen-like tail subunit (single st | 0.017  | 1.012 | 9.20E-01 | 9.20E+01 |  |  |
| 8085606 | ---         | ---       | ---                                   | 0.043  | 1.030 | 7.27E-01 | 7.27E+01 |  |  |
| 8085608 | NM_012260   | HACL1     | 2-hydroxyacyl-CoA lyase 1             | -0.095 | 0.936 | 5.20E-01 | 5.20E+01 |  |  |
| 8085628 | NM_015199   | ANKRD28   | ankyrin repeat domain 28              | -0.005 | 0.997 | 9.86E-01 | 9.86E+01 |  |  |
| 8085660 | NM_206831   | DPH3      | DPH3, KTI11 homolog (S. cerevisia     | 0.059  | 1.042 | 7.37E-01 | 7.37E+01 |  |  |
| 8085665 | NM_015150   | RFTN1     | raftlin, lipid raft linker 1          | -0.230 | 0.853 | 2.38E-03 | 2.38E+01 |  |  |
| 8085689 | NM_014744   | TBC1D5    | TBC1 domain family, member 5          | 0.143  | 1.104 | 1.55E-01 | 1.55E+01 |  |  |
| 8085714 | ---         | ---       | ---                                   | 0.224  | 1.168 | 1.57E-01 | 1.57E+01 |  |  |
| 8085716 | NM_002971   | SATB1     | SATB homeobox 1                       | -0.097 | 0.935 | 4.20E-01 | 4.20E+01 |  |  |
| 8085770 | ---         | ---       | ---                                   | 0.077  | 1.055 | 7.05E-01 | 7.05E+01 |  |  |
| 8085815 | NM_001068   | TOP2B     | topoisomerase (DNA) II beta 180k      | -0.015 | 0.990 | 9.36E-01 | 9.36E+01 |  |  |
| 8085852 | NM_018297   | NGLY1     | N-glycanase 1                         | 0.093  | 1.066 | 2.96E-01 | 2.96E+01 |  |  |
| 8085914 | NM_003615   | SLC4A7    | solute carrier family 4, sodium bic   | 0.186  | 1.137 | 1.75E-01 | 1.75E+01 |  |  |
| 8085946 | NM_005442   | EOMES     | eomesodermin homolog (Xenopus         | -0.038 | 0.974 | 9.11E-01 | 9.11E+01 |  |  |
| 8085984 | NM_017784   | OSBPL10   | oxysterol binding protein-like 10     | 0.146  | 1.107 | 2.70E-01 | 2.70E+01 |  |  |
| 8085999 | NM_017801   | CTMT6     | CKLF-like MARVEL transmembran         | 0.168  | 1.124 | 1.61E-01 | 1.61E+01 |  |  |
| 8086008 | NM_016141   | DYNC1L1   | dynein, cytoplasmic 1, light interm   | 0.069  | 1.049 | 7.47E-01 | 7.47E+01 |  |  |
| 8086048 | NM_00103977 | TMPPE     | transmembrane protein with meta       | 0.029  | 1.020 | 8.74E-01 | 8.74E+01 |  |  |
| 8086051 | NM_015551   | SUSD5     | sushi domain containing 5             | -0.049 | 0.966 | 7.31E-01 | 7.31E+01 |  |  |
| 8086057 | NM_014517   | UBP1      | upstream binding protein 1 (LBP-1     | 0.019  | 1.013 | 8.74E-01 | 8.74E+01 |  |  |
| 8086077 | NM_015097   | CLASP2    | cytoplasmic linker associated prot    | 0.048  | 1.034 | 6.99E-01 | 6.99E+01 |  |  |
| 8086125 | NM_014831   | LBA1      | lupus brain antigen 1                 | -0.125 | 0.917 | 2.82E-01 | 2.82E+01 |  |  |
| 8086141 | NM_014805   | EPM2AIP1  | EPM2A (laforin) interacting protei    | -0.073 | 0.950 | 6.05E-01 | 6.05E+01 |  |  |
| 8086148 | NM_000992   | RPL29     | ribosomal protein L29                 | -0.045 | 0.969 | 8.38E-01 | 8.38E+01 |  |  |
| 8086150 | NM_006309   | LRRFIP2   | leucine rich repeat (in FLII) interac | -0.058 | 0.961 | 7.63E-01 | 7.63E+01 |  |  |
| 8086185 | NM_006225   | PLCD1     | phospholipase C, delta 1              | -0.065 | 0.956 | 6.11E-01 | 6.11E+01 |  |  |
| 8086201 | NM_001607   | ACAA1     | acetyl-Coenzyme A acyltransferase     | 0.079  | 1.056 | 4.75E-01 | 4.75E+01 |  |  |
| 8086317 | NM_031899   | GORASP1   | golgi reassembly stacking protein     | 0.031  | 1.021 | 7.38E-01 | 7.38E+01 |  |  |
| 8086330 | NM_033027   | CSRNP1    | cysteine-serine-rich nuclear protei   | -0.173 | 0.887 | 1.05E-02 | 1.05E+00 |  |  |
| 8086341 | NM_194293   | XIRP1     | xin actin-binding repeat containing   | -0.002 | 0.998 | 9.88E-01 | 9.88E+01 |  |  |
| 8086352 | NM_017886   | ULK4      | unc-51-like kinase 4 (C. elegans)     | -0.051 | 0.966 | 7.73E-01 | 7.73E+01 |  |  |
| 8086391 | NM_000729   | CCK       | cholecystokinin                       | 0.001  | 1.001 | 9.95E-01 | 9.95E+01 |  |  |
| 8086406 | NM_004206   | SEC22C    | SEC22 vesicle trafficking protein h   | -0.061 | 0.959 | 7.99E-01 | 7.99E+01 |  |  |
| 8086417 | ---         | ---       | ---                                   | -0.012 | 0.992 | 9.53E-01 | 9.53E+01 |  |  |
| 8086419 | NR_027753   | HHATL     | hedgehog acyltransferase-like         | -0.083 | 0.944 | 4.97E-01 | 4.97E+01 |  |  |
| 8086434 | NM_144719   | CCDC13    | coiled-coil domain containing 13      | -0.012 | 0.992 | 9.28E-01 | 9.28E+01 |  |  |
| 8086451 | NM_00109966 | HIGD1A    | HIG1 hypoxia inducible domain fa      | 0.001  | 1.001 | 9.98E-01 | 9.98E+01 |  |  |
| 8086462 | NM_032806   | C3orf39   | chromosome 3 open reading fram        | -0.017 | 0.988 | 9.28E-01 | 9.28E+01 |  |  |
| 8086467 | NM_018075   | ANO10     | anoctamin 10                          | 0.086  | 1.061 | 7.51E-01 | 7.51E+01 |  |  |
| 8086482 | NM_181489   | ZNF445    | zinc finger protein 445               | -0.019 | 0.987 | 9.21E-01 | 9.21E+01 |  |  |
| 8086498 | NM_020696   | KIAA1143  | KIAA1143                              | 0.020  | 1.014 | 9.43E-01 | 9.43E+01 |  |  |
| 8086503 | NM_00113517 | ZDHHC3    | zinc finger, DHHC-type containing     | -0.062 | 0.958 | 7.63E-01 | 7.63E+01 |  |  |
| 8086505 | NM_016598   | ZDHHC3    | zinc finger, DHHC-type containing     | -0.065 | 0.956 | 6.82E-01 | 6.82E+01 |  |  |
| 8086517 | NM_022842   | CDCP1     | CUB domain containing protein 1       | 0.357  | 1.281 | 2.08E-01 | 2.08E+01 |  |  |
| 8086530 | NM_015444   | TMEM158   | transmembrane protein 158             | 0.076  | 1.054 | 2.81E-01 | 2.81E+01 |  |  |
| 8086538 | BC047037    | LOC644714 | hypothetical protein LOC644714        | 0.198  | 1.147 | 5.67E-01 | 5.67E+01 |  |  |
| 8086540 | NM_020208   | SLC6A20   | solute carrier family 6 (proline IMI  | -0.031 | 0.979 | 8.40E-01 | 8.40E+01 |  |  |
| 8086572 | NM_024513   | FYCO1     | FYVE and coiled-coil domain conta     | -0.084 | 0.944 | 4.57E-01 | 4.57E+01 |  |  |
| 8086595 | NM_005283   | XCR1      | chemokine (C motif) receptor 1        | 0.176  | 1.130 | 8.24E-02 | 8.24E+00 |  |  |
| 8086607 | NM_002343   | LTF       | lactotransferrin                      | 0.001  | 1.001 | 9.98E-01 | 9.98E+01 |  |  |
| 8086627 | NM_147129   | ALS2CL    | ALS2 C-terminal like                  | -0.070 | 0.953 | 4.83E-01 | 4.83E+01 |  |  |
| 8086669 | NM_199183   | TESSP5    | testis serine protease 5              | -0.055 | 0.963 | 4.49E-01 | 4.49E+01 |  |  |
| 8086683 | NM_182702   | TESSP2    | testis serine protease 2              | -0.030 | 0.980 | 7.73E-01 | 7.73E+01 |  |  |
| 8086689 | NM_000258   | MYL3      | myosin, light chain 3, alkali; ventri | 0.021  | 1.015 | 9.18E-01 | 9.18E+01 |  |  |
| 8086698 | NM_144716   | CCDC12    | coiled-coil domain containing 12      | -0.071 | 0.952 | 6.62E-01 | 6.62E+01 |  |  |
| 8086706 | NM_014159   | SETD2     | SET domain containing 2               | -0.106 | 0.929 | 1.57E-01 | 1.57E+01 |  |  |
| 8086752 | NR_003041   | SNORD13   | small nucleolar RNA, C/D box 13       | 0.309  | 1.239 | 4.13E-01 | 4.13E+01 |  |  |
| 8086754 | NM_012235   | SCAP      | SREBF chaperone                       | 0.001  | 1.001 | 9.96E-01 | 9.96E+01 |  |  |
| 8086810 | NM_003074   | SMARCC1   | SWI/SNF related, matrix associate     | 0.004  | 1.003 | 9.80E-01 | 9.80E+01 |  |  |
| 8086842 | NM_002375   | MAP4      | microtubule-associated protein 4      | 0.010  | 1.007 | 9.53E-01 | 9.53E+01 |  |  |
| 8086876 | ---         | ---       | ---                                   | -0.051 | 0.965 | 8.81E-01 | 8.81E+01 |  |  |
| 8086908 | NM_00113008 | PLXNB1    | plexin B1                             | -0.011 | 0.993 | 9.23E-01 | 9.23E+01 |  |  |
| 8086949 | NM_024661   | CCDC51    | coiled-coil domain containing 51      | 0.082  | 1.058 | 5.35E-01 | 5.35E+01 |  |  |
| 8086953 | NM_016479   | SHISA5    | shisa homolog 5 (Xenopus laevis)      | 0.141  | 1.103 | 1.62E-01 | 1.62E+01 |  |  |
| 8086981 | NM_033199   | UCN2      | urocortin 2                           | 0.038  | 1.026 | 8.43E-01 | 8.43E+01 |  |  |
| 8086985 | NM_000094   | COL7A1    | collagen, type VII, alpha 1           | -0.081 | 0.945 | 1.71E-01 | 1.71E+01 |  |  |
| 8087100 | NM_003365   | UQCRC1    | ubiquinol-cytochrome c reductase      | 0.203  | 1.151 | 1.15E-02 | 1.15E+00 |  |  |
| 8087116 | NM_00100826 | TMEM89    | transmembrane protein 89              | -0.051 | 0.966 | 6.60E-01 | 6.60E+01 |  |  |
| 8087119 | NM_022911   | SLC26A6   | solute carrier family 26, member 6    | -0.057 | 0.961 | 5.97E-01 | 5.97E+01 |  |  |
| 8087145 | NM_001407   | CELSR3    | cadherin, EGF LAG seven-pass G-t      | 0.004  | 1.002 | 9.85E-01 | 9.85E+01 |  |  |
| 8087182 | NM_016453   | NCKIPSD   | NCK interacting protein with SH3 d    | 0.001  | 1.001 | 9.94E-01 | 9.94E+01 |  |  |
| 8087201 | NM_016291   | IP6K2     | inositol hexakisphosphate kinase 2    | -0.087 | 0.942 | 4.47E-01 | 4.47E+01 |  |  |
| 8087210 | NM_004157   | PRKAR2A   | protein kinase, cAMP-dependent,       | -0.062 | 0.958 | 6.79E-01 | 6.79E+01 |  |  |
| 8087224 | NM_000387   | SLC25A20  | solute carrier family 25 (carnitine/  | 0.038  | 1.026 | 8.71E-01 | 8.71E+01 |  |  |
| 8087234 | NM_006321   | ARIH2     | ariadne homolog 2 (Drosophila)        | -0.150 | 0.901 | 1.25E-01 | 1.25E+01 |  |  |

|         |             |          |                                      |        |       |          |          |  |  |
|---------|-------------|----------|--------------------------------------|--------|-------|----------|----------|--|--|
| 8087236 | NM_00100999 | DALRD3   | DALR anticodon binding domain cl     | -0.069 | 0.954 | 3.04E-01 | 3.04E+01 |  |  |
| 8087250 | ---         | ---      | ---                                  | -0.137 | 0.910 | 4.27E-01 | 4.27E+01 |  |  |
| 8087252 | ---         | ---      | ---                                  | -0.017 | 0.988 | 9.19E-01 | 9.19E+01 |  |  |
| 8087254 | NM_000884   | IMPDH2   | IMP (inosine monophosphate) de       | -0.073 | 0.951 | 7.52E-01 | 7.52E+01 |  |  |
| 8087271 | NM_017730   | QRICH1   | glutamine-rich 1                     | -0.024 | 0.984 | 8.94E-01 | 8.94E+01 |  |  |
| 8087283 | NM_005051   | QARS     | glutamyl-tRNA synthetase             | -0.050 | 0.966 | 6.57E-01 | 6.57E+01 |  |  |
| 8087308 | NM_006677   | USP19    | ubiquitin specific peptidase 19      | 0.020  | 1.014 | 8.97E-01 | 8.97E+01 |  |  |
| 8087337 | NM_002292   | LAMB2    | laminin, beta 2 (laminin 5)          | -0.027 | 0.981 | 7.88E-01 | 7.88E+01 |  |  |
| 8087372 | NM_022903   | CCDC71   | coiled-coil domain containing 71     | 0.039  | 1.027 | 8.10E-01 | 8.10E+01 |  |  |
| 8087374 | NM_198562   | C3orf62  | chromosome 3 open reading fram       | 0.021  | 1.015 | 9.35E-01 | 9.35E+01 |  |  |
| 8087380 | NM_003363   | USP4     | ubiquitin specific peptidase 4 (pro  | 0.036  | 1.025 | 8.45E-01 | 8.45E+01 |  |  |
| 8087405 | NM_201397   | GPX1     | glutathione peroxidase 1             | -0.036 | 0.975 | 8.34E-01 | 8.34E+01 |  |  |
| 8087409 | NM_001664   | RHOA     | ras homolog gene family, member      | 0.087  | 1.062 | 4.78E-01 | 4.78E+01 |  |  |
| 8087419 | NM_000481   | AMT      | aminomethyltransferase               | -0.020 | 0.986 | 9.24E-01 | 9.24E+01 |  |  |
| 8087433 | NM_032316   | NICN1    | nicotin 1                            | 0.058  | 1.041 | 5.38E-01 | 5.38E+01 |  |  |
| 8087447 | NM_020998   | MST1     | macrophage stimulating 1 (hepatc     | 0.157  | 1.115 | 1.78E-01 | 1.78E+01 |  |  |
| 8087453 | NM_198722   | AMIGO3   | adhesion molecule with Ig-like do    | 0.016  | 1.011 | 9.02E-01 | 9.02E+01 |  |  |
| 8087461 | NM_013334   | GMPPB    | GDP-mannose pyrophosphorylase        | -0.050 | 0.966 | 6.37E-01 | 6.37E+01 |  |  |
| 8087473 | NM_153273   | IP6K1    | inositol hexakisphosphate kinase 1   | -0.082 | 0.945 | 4.51E-01 | 4.51E+01 |  |  |
| 8087481 | NM_00100754 | CDH29    | cadherin-like 29                     | 0.017  | 1.012 | 9.16E-01 | 9.16E+01 |  |  |
| 8087485 | NM_003335   | UBA7     | ubiquitin-like modifier activating e | 0.056  | 1.040 | 6.77E-01 | 6.77E+01 |  |  |
| 8087513 | NM_005879   | TRAF1    | TRAF interacting protein             | 0.011  | 1.008 | 9.53E-01 | 9.53E+01 |  |  |
| 8087576 | NM_006764   | IFRD2    | interferon-related developmental     | -0.017 | 0.988 | 8.98E-01 | 8.98E+01 |  |  |
| 8087596 | NM_003549   | HYAL3    | hyaluronoglucosaminidase 3           | -0.077 | 0.948 | 2.02E-01 | 2.02E+01 |  |  |
| 8087611 | NM_007312   | HYAL1    | hyaluronoglucosaminidase 1           | -0.096 | 0.936 | 1.13E-01 | 1.13E+01 |  |  |
| 8087624 | NM_033158   | HYAL2    | hyaluronoglucosaminidase 2           | -0.047 | 0.968 | 6.66E-01 | 6.66E+01 |  |  |
| 8087634 | NM_007275   | TUSC2    | tumor suppressor candidate 2         | -0.012 | 0.992 | 9.49E-01 | 9.49E+01 |  |  |
| 8087640 | NM_007182   | RASSF1   | Ras association (RalGDS/AF-6) do     | -0.017 | 0.989 | 9.27E-01 | 9.27E+01 |  |  |
| 8087653 | NM_015896   | ZMYND10  | zinc finger, MYND-type containing    | -0.079 | 0.946 | 2.93E-01 | 2.93E+01 |  |  |
| 8087669 | NM_006545   | TUSC4    | tumor suppressor candidate 4         | -0.075 | 0.950 | 6.30E-01 | 6.30E+01 |  |  |
| 8087685 | NM_007024   | TMEM115  | transmembrane protein 115            | -0.149 | 0.902 | 1.36E-02 | 1.36E+00 |  |  |
| 8087691 | NM_00100550 | CACNA2D2 | calcium channel, voltage-depende     | 0.013  | 1.009 | 9.35E-01 | 9.35E+01 |  |  |
| 8087731 | BC034766    | C3orf18  | chromosome 3 open reading fram       | -0.011 | 0.992 | 9.57E-01 | 9.57E+01 |  |  |
| 8087739 | NM_013324   | CISH     | cytokine inducible SH2-containing    | -0.060 | 0.960 | 5.48E-01 | 5.48E+01 |  |  |
| 8087746 | ---         | ---      | ---                                  | 0.016  | 1.011 | 9.53E-01 | 9.53E+01 |  |  |
| 8087748 | NM_014703   | VPRBP    | Vpr (HIV-1) binding protein          | -0.012 | 0.992 | 9.50E-01 | 9.50E+01 |  |  |
| 8087780 | ---         | ---      | ---                                  | -0.143 | 0.906 | 2.32E-01 | 2.32E+01 |  |  |
| 8087790 | NM_004704   | RRP9     | ribosomal RNA processing 9, small    | -0.049 | 0.966 | 6.92E-01 | 6.92E+01 |  |  |
| 8087806 | NM_020418   | PCBP4    | poly(rC) binding protein 4           | -0.056 | 0.962 | 4.77E-01 | 4.77E+01 |  |  |
| 8087825 | NM_032750   | ABHD14B  | abhydrolase domain containing 14     | -0.009 | 0.994 | 9.61E-01 | 9.61E+01 |  |  |
| 8087830 | NM_000992   | RPL29    | ribosomal protein L29                | -0.046 | 0.969 | 8.07E-01 | 8.07E+01 |  |  |
| 8087833 | NM_001947   | DUSP7    | dual specificity phosphatase 7       | 0.010  | 1.007 | 9.53E-01 | 9.53E+01 |  |  |
| 8087852 | NM_017442   | TLR9     | toll-like receptor 9                 | 0.008  | 1.005 | 9.67E-01 | 9.67E+01 |  |  |
| 8087860 | NM_007284   | TWF2     | twfilin, actin-binding protein, ho   | 0.040  | 1.028 | 7.63E-01 | 7.63E+01 |  |  |
| 8087874 | NM_025222   | WDR82    | WD repeat domain 82                  | 0.030  | 1.021 | 8.68E-01 | 8.68E+01 |  |  |
| 8087881 | ---         | ---      | ---                                  | -0.004 | 0.997 | 9.93E-01 | 9.93E+01 |  |  |
| 8087885 | NM_004656   | BAP1     | BRCA1 associated protein-1 (ubiqu    | 0.016  | 1.011 | 9.16E-01 | 9.16E+01 |  |  |
| 8087907 | NM_020163   | SEMA3G   | sema domain, immunoglobulin do       | -0.038 | 0.974 | 7.01E-01 | 7.01E+01 |  |  |
| 8087925 | NM_003280   | TNNC1    | troponin C type 1 (slow)             | -0.005 | 0.996 | 9.84E-01 | 9.84E+01 |  |  |
| 8087935 | NM_022908   | NT5DC2   | 5'-nucleotidase domain containing    | 0.056  | 1.039 | 5.47E-01 | 5.47E+01 |  |  |
| 8087951 | NM_018165   | PBRM1    | polybromo 1                          | 0.103  | 1.074 | 2.12E-01 | 2.12E+01 |  |  |
| 8087985 | NM_00101098 | GLT8D1   | glycosyltransferase 8 domain cont    | -0.050 | 0.966 | 7.40E-01 | 7.40E+01 |  |  |
| 8088001 | NM_003157   | NEK4     | NIMA (never in mitosis gene a)-rel   | -0.128 | 0.915 | 4.21E-01 | 4.21E+01 |  |  |
| 8088020 | NM_002218   | ITIH4    | inter-alpha (globulin) inhibitor H4  | -0.049 | 0.966 | 7.04E-01 | 7.04E+01 |  |  |
| 8088047 | NM_205853   | MUSTN1   | musculoskeletal, embryonic nucle     | -0.128 | 0.915 | 3.09E-01 | 3.09E+01 |  |  |
| 8088054 | NM_198563   | TMEM110  | transmembrane protein 110            | -0.024 | 0.984 | 9.00E-01 | 9.00E+01 |  |  |
| 8088065 | NM_00100515 | SFMBT1   | Scm-like with four mbt domains 1     | 0.033  | 1.023 | 8.89E-01 | 8.89E+01 |  |  |
| 8088090 | NM_052859   | RFT1     | RFT1 homolog (S. cerevisiae)         | -0.056 | 0.962 | 8.33E-01 | 8.33E+01 |  |  |
| 8088092 | NM_052859   | RFT1     | RFT1 homolog (S. cerevisiae)         | 0.071  | 1.050 | 6.22E-01 | 6.22E+01 |  |  |
| 8088106 | NM_00113505 | TKT      | transketolase                        | -0.017 | 0.988 | 9.49E-01 | 9.49E+01 |  |  |
| 8088126 | ---         | ---      | ---                                  | 0.020  | 1.014 | 9.73E-01 | 9.73E+01 |  |  |
| 8088128 | NM_018403   | DCP1A    | DCP1 decapping enzyme homolog        | -0.011 | 0.993 | 9.58E-01 | 9.58E+01 |  |  |
| 8088142 | NM_018397   | CHDH     | choline dehydrogenase                | -0.046 | 0.968 | 7.94E-01 | 7.94E+01 |  |  |
| 8088151 | NM_022899   | ACTR8    | ARP8 actin-related protein 8 hom     | 0.037  | 1.026 | 8.23E-01 | 8.23E+01 |  |  |
| 8088167 | NM_021237   | SELK     | selenoprotein K                      | -0.038 | 0.974 | 8.10E-01 | 8.10E+01 |  |  |
| 8088172 | ---         | ---      | ---                                  | -0.007 | 0.995 | 9.65E-01 | 9.65E+01 |  |  |
| 8088219 | NM_00111273 | C3orf63  | chromosome 3 open reading fram       | 0.088  | 1.063 | 1.30E-01 | 1.30E+01 |  |  |
| 8088247 | NM_00112861 | ARHGEF3  | Rho guanine nucleotide exchange      | 0.094  | 1.068 | 3.67E-01 | 3.67E+01 |  |  |
| 8088292 | NM_130387   | ASB14    | ankyrin repeat and SOCS box-cont     | 0.061  | 1.043 | 7.57E-01 | 7.57E+01 |  |  |
| 8088339 | NM_001660   | ARF4     | ADP-ribosylation factor 4            | 0.027  | 1.019 | 9.00E-01 | 9.00E+01 |  |  |
| 8088348 | NM_152678   | FAM116A  | family with sequence similarity 11   | 0.098  | 1.070 | 1.94E-01 | 1.94E+01 |  |  |
| 8088369 | ---         | ---      | ---                                  | -0.048 | 0.968 | 6.51E-01 | 6.51E+01 |  |  |
| 8088384 | NM_000925   | PDHB     | pyruvate dehydrogenase (lipoam       | 0.025  | 1.017 | 8.95E-01 | 8.95E+01 |  |  |
| 8088415 | NM_007177   | FAM107A  | family with sequence similarity 10   | -0.120 | 0.920 | 6.47E-02 | 6.47E+00 |  |  |
| 8088425 | NM_138805   | FAM3D    | family with sequence similarity 3,   | -0.106 | 0.929 | 1.00E-01 | 1.00E+01 |  |  |
| 8088458 | NM_002012   | FHIT     | fragile histidine triad gene         | 0.118  | 1.085 | 5.93E-01 | 5.93E+01 |  |  |
| 8088468 | AF134979    | NPCDR1   | nasopharyngeal carcinoma, down       | 0.049  | 1.035 | 9.27E-01 | 9.27E+01 |  |  |

|         |              |              |                                      |        |       |          |          |  |  |
|---------|--------------|--------------|--------------------------------------|--------|-------|----------|----------|--|--|
| 8088474 | ---          | ---          | ---                                  | -0.098 | 0.934 | 6.23E-01 | 6.23E+01 |  |  |
| 8088478 | ---          | ---          | ---                                  | -0.020 | 0.986 | 9.27E-01 | 9.27E+01 |  |  |
| 8088480 | NR_026582    | ID2B         | inhibitor of DNA binding 2B, domi    | 0.004  | 1.003 | 9.75E-01 | 9.75E+01 |  |  |
| 8088526 | NM_025075    | THOC7        | THO complex 7 homolog (Drosoph       | 0.035  | 1.025 | 8.72E-01 | 8.72E+01 |  |  |
| 8088535 | NM_014814    | PSMD6        | proteasome (prosome, macropain       | -0.047 | 0.968 | 7.38E-01 | 7.38E+01 |  |  |
| 8088642 | NM_015541    | LRIG1        | leucine-rich repeats and immunog     | -0.126 | 0.917 | 2.49E-01 | 2.49E+01 |  |  |
| 8088664 | NM_003848    | SUCLG2       | succinate-CoA ligase, GDP-forming    | 0.092  | 1.066 | 6.38E-01 | 6.38E+01 |  |  |
| 8088680 | NM_173654    | C3orf64      | chromosome 3 open reading fram       | -0.082 | 0.945 | 6.98E-01 | 6.98E+01 |  |  |
| 8088700 | NM_007114    | TMF1         | TATA element modulatory factor 1     | -0.053 | 0.964 | 6.57E-01 | 6.57E+01 |  |  |
| 8088718 | NM_003968    | UBA3         | ubiquitin-like modifier activating e | 0.040  | 1.028 | 8.29E-01 | 8.29E+01 |  |  |
| 8088768 | ---          | ---          | ---                                  | 0.653  | 1.573 | 5.45E-02 | 5.45E+00 |  |  |
| 8088776 | NM_032682    | FOXP1        | forkhead box P1                      | -0.014 | 0.990 | 9.54E-01 | 9.54E+01 |  |  |
| 8088803 | NM_173359    | EIF4E3       | eukaryotic translation initiation fa | -0.034 | 0.977 | 8.78E-01 | 8.78E+01 |  |  |
| 8088813 | NM_00112612  | PROK2        | prokineticin 2                       | -0.060 | 0.959 | 8.05E-01 | 8.05E+01 |  |  |
| 8088820 | NM_012234    | RYBP         | RING1 and YY1 binding protein        | -0.101 | 0.932 | 3.90E-01 | 3.90E+01 |  |  |
| 8088830 | NM_018130    | SHQ1         | SHQ1 homolog (S. cerevisiae)         | 0.154  | 1.113 | 1.67E-01 | 1.67E+01 |  |  |
| 8088846 | ---          | ---          | ---                                  | 0.073  | 1.052 | 5.01E-01 | 5.01E+01 |  |  |
| 8088889 | ---          | ---          | ---                                  | -0.003 | 0.998 | 9.87E-01 | 9.87E+01 |  |  |
| 8088893 | ---          | ---          | ---                                  | 0.018  | 1.013 | 9.37E-01 | 9.37E+01 |  |  |
| 8088895 | NR_024241    | FAM86D       | family with sequence similarity 86   | 0.089  | 1.063 | 5.43E-01 | 5.43E+01 |  |  |
| 8088905 | ENST00000442 | LOC100287293 | similar to hCG2036843                | -0.013 | 0.991 | 9.53E-01 | 9.53E+01 |  |  |
| 8088911 | NM_00112822  | ZNF717       | zinc finger protein 717              | 0.004  | 1.003 | 9.90E-01 | 9.90E+01 |  |  |
| 8088919 | NM_133631    | ROBO1        | roundabout, axon guidance recept     | -0.202 | 0.870 | 8.23E-02 | 8.23E+00 |  |  |
| 8088958 | NM_000158    | GBE1         | glucan (1,4-alpha-), branching enz   | -0.039 | 0.973 | 9.01E-01 | 9.01E+01 |  |  |
| 8089000 | NM_00100839  | CGGBP1       | CGG triplet repeat binding protein   | 0.039  | 1.027 | 7.53E-01 | 7.53E+01 |  |  |
| 8089029 | NM_176815    | DHFR1L       | dihydrofolate reductase-like 1       | 0.067  | 1.047 | 5.98E-01 | 5.98E+01 |  |  |
| 8089036 | ---          | ---          | ---                                  | 0.001  | 1.000 | 9.99E-01 | 9.99E+01 |  |  |
| 8089038 | ---          | ---          | ---                                  | -0.089 | 0.940 | 6.11E-01 | 6.11E+01 |  |  |
| 8089040 | NM_00104253  | MINA         | MYC induced nuclear antigen          | 0.118  | 1.086 | 4.38E-01 | 4.38E+01 |  |  |
| 8089062 | NM_019895    | CLDND1       | claudin domain containing 1          | -0.276 | 0.826 | 5.83E-04 | 5.83E-02 |  |  |
| 8089072 | NM_000097    | CPOX         | coproporphyrinogen oxidase           | -0.206 | 0.867 | 1.59E-02 | 1.59E+00 |  |  |
| 8089082 | NM_080927    | DCBLD2       | discoidin, CUB and LCCL domain co    | -0.055 | 0.962 | 8.50E-01 | 8.50E+01 |  |  |
| 8089112 | NM_182909    | FILIP1L      | filamin A interacting protein 1-like | 0.070  | 1.050 | 7.61E-01 | 7.61E+01 |  |  |
| 8089128 | NM_014820    | TOMM70A      | translocase of outer mitochondria    | 0.066  | 1.047 | 5.48E-01 | 5.48E+01 |  |  |
| 8089203 | NM_020654    | SENPF        | SUMO1/sentrin specific peptidase     | 0.004  | 1.003 | 9.87E-01 | 9.87E+01 |  |  |
| 8089230 | ---          | ---          | ---                                  | -0.007 | 0.995 | 9.76E-01 | 9.76E+01 |  |  |
| 8089234 | NM_014415    | ZBTB11       | zinc finger and BTB domain contai    | -0.036 | 0.975 | 8.01E-01 | 8.01E+01 |  |  |
| 8089247 | ---          | ---          | ---                                  | -0.058 | 0.960 | 9.64E-01 | 9.64E+01 |  |  |
| 8089249 | NM_000986    | RPL24        | ribosomal protein L24                | -0.005 | 0.997 | 9.81E-01 | 9.81E+01 |  |  |
| 8089261 | NM_170662    | CBLB         | Cas-Br-M (murine) ecotropic retro    | 0.069  | 1.049 | 6.34E-01 | 6.34E+01 |  |  |
| 8089285 | ---          | ---          | ---                                  | 0.147  | 1.108 | 5.55E-01 | 5.55E+01 |  |  |
| 8089295 | ---          | ---          | ---                                  | 0.066  | 1.047 | 7.85E-01 | 7.85E+01 |  |  |
| 8089299 | NM_001777    | CD47         | CD47 molecule                        | 0.181  | 1.134 | 5.85E-03 | 5.85E-01 |  |  |
| 8089314 | NM_018010    | IFT57        | intraflagellar transport 57 homolo   | 0.029  | 1.020 | 9.05E-01 | 9.05E+01 |  |  |
| 8089467 | NM_024508    | ZBED2        | zinc finger, BED-type containing 2   | 0.015  | 1.011 | 9.68E-01 | 9.68E+01 |  |  |
| 8089478 | NM_00100875  | GCET2        | germinal center expressed transcr    | 0.092  | 1.066 | 6.36E-01 | 6.36E+01 |  |  |
| 8089527 | NM_022488    | ATG3         | ATG3 autophagy related 3 homolo      | 0.275  | 1.210 | 5.83E-03 | 5.83E-01 |  |  |
| 8089584 | NM_015412    | C3orf17      | chromosome 3 open reading fram       | -0.054 | 0.963 | 6.51E-01 | 6.51E+01 |  |  |
| 8089596 | ENST00000393 | WDR52        | WD repeat domain 52                  | -0.137 | 0.909 | 6.08E-01 | 6.08E+01 |  |  |
| 8089647 | NM_00100989  | KIAA2018     | KIAA2018                             | 0.031  | 1.022 | 8.55E-01 | 8.55E+01 |  |  |
| 8089652 | NM_025146    | NAT13        | N-acetyltransferase 13 (GCN5-rela    | 0.051  | 1.036 | 7.08E-01 | 7.08E+01 |  |  |
| 8089659 | AK302488     | KIAA1407     | KIAA1407                             | -0.020 | 0.986 | 9.28E-01 | 9.28E+01 |  |  |
| 8089677 | ---          | ---          | ---                                  | 0.021  | 1.015 | 9.50E-01 | 9.50E+01 |  |  |
| 8089694 | NM_007136    | ZNF80        | zinc finger protein 80               | 0.032  | 1.022 | 9.48E-01 | 9.48E+01 |  |  |
| 8089701 | NM_015642    | ZBTB20       | zinc finger and BTB domain contai    | -0.184 | 0.881 | 5.26E-02 | 5.26E+00 |  |  |
| 8089723 | ---          | ---          | ---                                  | -0.086 | 0.942 | 4.97E-01 | 4.97E+01 |  |  |
| 8089743 | NM_212543    | B4GALT4      | UDP-Gal:betaGlcNAc beta 1,4- gal     | 0.030  | 1.021 | 9.33E-01 | 9.33E+01 |  |  |
| 8089759 | NM_018266    | TMEM39A      | transmembrane protein 39A            | -0.028 | 0.980 | 8.96E-01 | 8.96E+01 |  |  |
| 8089771 | NM_005191    | CD80         | CD80 molecule                        | -0.162 | 0.894 | 6.97E-01 | 6.97E+01 |  |  |
| 8089795 | NM_005694    | COX17        | COX17 cytochrome c oxidase asse      | -0.075 | 0.950 | 6.94E-01 | 6.94E+01 |  |  |
| 8089801 | NM_002093    | GSK3B        | glycogen synthase kinase 3 beta      | 0.005  | 1.004 | 9.83E-01 | 9.83E+01 |  |  |
| 8089830 | NM_00109967  | LRRCS8       | leucine rich repeat containing 58    | 0.029  | 1.020 | 8.71E-01 | 8.71E+01 |  |  |
| 8089849 | ---          | ---          | ---                                  | -0.017 | 0.988 | 9.53E-01 | 9.53E+01 |  |  |
| 8089867 | NM_173825    | RABL3        | RAB, member of RAS oncogene fa       | 0.098  | 1.071 | 5.13E-01 | 5.13E+01 |  |  |
| 8089911 | NM_005335    | HCLS1        | hematopoietic cell-specific Lyn su   | 0.079  | 1.056 | 3.81E-01 | 3.81E+01 |  |  |
| 8089926 | ---          | ---          | ---                                  | 0.103  | 1.074 | 5.90E-01 | 5.90E+01 |  |  |
| 8089928 | ---          | ---          | ---                                  | 0.087  | 1.062 | 7.61E-01 | 7.61E+01 |  |  |
| 8089930 | NM_004487    | GOLGB1       | golgin B1, golgi integral membran    | -0.164 | 0.893 | 5.07E-02 | 5.07E+00 |  |  |
| 8089954 | NM_00102357  | IQCB1        | IQ motif containing B1               | 0.087  | 1.062 | 5.29E-01 | 5.29E+01 |  |  |
| 8089970 | NM_175924    | ILDR1        | immunoglobulin-like domain cont      | 0.092  | 1.066 | 2.24E-01 | 2.24E+01 |  |  |
| 8089988 | NM_00101792  | CCDC58       | coiled-coil domain containing 58     | -0.045 | 0.969 | 8.52E-01 | 8.52E+01 |  |  |
| 8089993 | NM_019069    | WDR5B        | WD repeat domain 5B                  | -0.003 | 0.998 | 9.90E-01 | 9.90E+01 |  |  |
| 8089999 | NR_026698    | KPNA1        | karyopherin alpha 1 (importin alph   | -0.055 | 0.963 | 6.93E-01 | 6.93E+01 |  |  |
| 8090018 | NM_031458    | PARP9        | poly (ADP-ribose) polymerase fam     | 0.151  | 1.111 | 4.67E-01 | 4.67E+01 |  |  |
| 8090030 | NM_024610    | HSPBAP1      | HSPB (heat shock 27kDa) associat     | 0.162  | 1.119 | 1.28E-01 | 1.28E+01 |  |  |
| 8090044 | NM_00103170  | SEMA5B       | sema domain, seven thrombospor       | 0.015  | 1.011 | 9.17E-01 | 9.17E+01 |  |  |
| 8090070 | NM_183357    | ADCY5        | adenylate cyclase 5                  | -0.049 | 0.966 | 7.40E-01 | 7.40E+01 |  |  |

|         |             |          |                                      |        |       |          |          |  |  |
|---------|-------------|----------|--------------------------------------|--------|-------|----------|----------|--|--|
| 8090091 | NM_198402   | PTPLB    | protein tyrosine phosphatase-like    | 0.102  | 1.073 | 4.25E-01 | 4.25E+01 |  |  |
| 8090098 | NM_053025   | MYLK     | myosin light chain kinase            | -0.076 | 0.949 | 2.76E-01 | 2.76E+01 |  |  |
| 8090133 | NM_022757   | CCDC14   | coiled-coil domain containing 14     | 0.099  | 1.071 | 5.28E-01 | 5.28E+01 |  |  |
| 8090162 | NM_002213   | ITGB5    | integrin, beta 5                     | -0.023 | 0.984 | 8.63E-01 | 8.63E+01 |  |  |
| 8090193 | NM_020733   | HEG1     | HEG homolog 1 (zebrafish)            | 0.032  | 1.023 | 9.16E-01 | 9.16E+01 |  |  |
| 8090214 | NM_024628   | SLC12A8  | solute carrier family 12 (potassium) | 0.012  | 1.008 | 9.57E-01 | 9.57E+01 |  |  |
| 8090237 | NM_021964   | ZNF148   | zinc finger protein 148              | 0.051  | 1.036 | 7.05E-01 | 7.05E+01 |  |  |
| 8090256 | NM_003794   | SNX4     | sorting nexin 4                      | 0.020  | 1.014 | 9.44E-01 | 9.44E+01 |  |  |
| 8090277 | NM_022776   | OSBPL11  | oxysterol binding protein-like 11    | 0.250  | 1.190 | 1.51E-01 | 1.51E+01 |  |  |
| 8090295 | NM_017836   | SLC41A3  | solute carrier family 41, member 3   | -0.092 | 0.938 | 4.39E-01 | 4.39E+01 |  |  |
| 8090314 | NM_012190   | ALDH1L1  | aldehyde dehydrogenase 1 family,     | -0.039 | 0.974 | 7.88E-01 | 7.88E+01 |  |  |
| 8090343 | NM_014079   | KLF15    | Kruppel-like factor 15               | 0.012  | 1.008 | 9.52E-01 | 9.52E+01 |  |  |
| 8090349 | ---         | ---      | ---                                  | -0.041 | 0.972 | 7.83E-01 | 7.83E+01 |  |  |
| 8090351 | NM_025112   | ZXDC     | ZKD family zinc finger C             | -0.086 | 0.942 | 2.81E-01 | 2.81E+01 |  |  |
| 8090364 | AK093796    | ZXDC     | ZKD family zinc finger C             | -0.024 | 0.984 | 9.19E-01 | 9.19E+01 |  |  |
| 8090366 | NM_144639   | UROC1    | urocanase domain containing 1        | 0.055  | 1.039 | 5.14E-01 | 5.14E+01 |  |  |
| 8090388 | BC032025    | C3orf22  | chromosome 3 open reading frame      | -0.013 | 0.991 | 9.50E-01 | 9.50E+01 |  |  |
| 8090420 | NM_016372   | TPRA1    | transmembrane protein, adipocyte     | -0.008 | 0.994 | 9.49E-01 | 9.49E+01 |  |  |
| 8090433 | NM_007283   | MGLL     | monoglyceride lipase                 | 0.232  | 1.174 | 1.66E-01 | 1.66E+01 |  |  |
| 8090448 | NM_003707   | RUVBL1   | RuvB-like 1 (E. coli)                | 0.034  | 1.024 | 8.77E-01 | 8.77E+01 |  |  |
| 8090462 | ---         | ---      | ---                                  | 0.043  | 1.030 | 7.39E-01 | 7.39E+01 |  |  |
| 8090464 | NM_153330   | DNAJB8   | DnaJ (Hsp40) homolog, subfamily      | -0.055 | 0.963 | 5.91E-01 | 5.91E+01 |  |  |
| 8090469 | NM_032638   | GATA2    | GATA binding protein 2               | -0.033 | 0.977 | 8.25E-01 | 8.25E+01 |  |  |
| 8090485 | NM_007354   | C3orf27  | chromosome 3 open reading frame      | -0.016 | 0.989 | 8.85E-01 | 8.85E+01 |  |  |
| 8090490 | NM_002950   | RPN1     | ribophorin I                         | 0.140  | 1.102 | 3.04E-01 | 3.04E+01 |  |  |
| 8090503 | ---         | ---      | ---                                  | 0.016  | 1.011 | 9.49E-01 | 9.49E+01 |  |  |
| 8090505 | ---         | ---      | ---                                  | 0.003  | 1.002 | 9.82E-01 | 9.82E+01 |  |  |
| 8090507 | ---         | ---      | ---                                  | -0.006 | 0.996 | 9.90E-01 | 9.90E+01 |  |  |
| 8090509 | NM_004637   | RAB7A    | RAB7A, member RAS oncogene fa        | 0.069  | 1.049 | 7.38E-01 | 7.38E+01 |  |  |
| 8090533 | NM_020701   | ISY1     | ISY1 splicing factor homolog (S. ce  | -0.109 | 0.927 | 4.32E-01 | 4.32E+01 |  |  |
| 8090546 | NM_00112719 | CNBP     | CCHC-type zinc finger, nucleic acid  | 0.045  | 1.032 | 4.54E-01 | 4.54E+01 |  |  |
| 8090555 | NM_006026   | H1FX     | H1 histone family, member X          | -0.048 | 0.967 | 7.09E-01 | 7.09E+01 |  |  |
| 8090559 | NR_003111   | RPL32P3  | ribosomal protein L32 pseudogene     | -0.040 | 0.973 | 8.20E-01 | 8.20E+01 |  |  |
| 8090565 | NR_002992   | SNORA7B  | small nucleolar RNA, H/ACA box 7     | -0.016 | 0.989 | 9.67E-01 | 9.67E+01 |  |  |
| 8090577 | NM_003925   | MBD4     | methyl-CpG binding domain prote      | 0.058  | 1.041 | 7.42E-01 | 7.42E+01 |  |  |
| 8090591 | NM_015103   | PLXND1   | plexin D1                            | 0.113  | 1.081 | 3.46E-01 | 3.46E+01 |  |  |
| 8090630 | NM_00101739 | TMCC1    | transmembrane and coiled-coil do     | 0.046  | 1.033 | 8.30E-01 | 8.30E+01 |  |  |
| 8090637 | ---         | ---      | ---                                  | 0.072  | 1.051 | 6.16E-01 | 6.16E+01 |  |  |
| 8090639 | NM_014602   | PIK3R4   | phosphoinositide-3-kinase, regula    | -0.046 | 0.968 | 7.95E-01 | 7.95E+01 |  |  |
| 8090662 | ---         | ---      | ---                                  | 0.002  | 1.001 | 9.97E-01 | 9.97E+01 |  |  |
| 8090678 | NM_007208   | MRPL3    | mitochondrial ribosomal protein L    | 0.031  | 1.022 | 8.47E-01 | 8.47E+01 |  |  |
| 8090737 | NM_153240   | NPHP3    | nephronophthisis 3 (adolescent)      | -0.006 | 0.996 | 9.83E-01 | 9.83E+01 |  |  |
| 8090770 | ---         | ---      | ---                                  | 0.010  | 1.007 | 9.53E-01 | 9.53E+01 |  |  |
| 8090772 | NM_007027   | TOPBP1   | topoisomerase (DNA) II binding pr    | 0.036  | 1.026 | 8.23E-01 | 8.23E+01 |  |  |
| 8090803 | NM_016577   | RAB6B    | RAB6B, member RAS oncogene fa        | -0.013 | 0.991 | 9.17E-01 | 9.17E+01 |  |  |
| 8090823 | NM_005630   | SLCO2A1  | solute carrier organic anion transp  | -0.018 | 0.987 | 8.84E-01 | 8.84E+01 |  |  |
| 8090840 | NM_00100586 | RYK      | RYK receptor-like tyrosine kinase    | 0.033  | 1.023 | 8.53E-01 | 8.53E+01 |  |  |
| 8090852 | NM_016201   | AMOTL2   | angiomotin like 2                    | -0.075 | 0.949 | 4.12E-01 | 4.12E+01 |  |  |
| 8090866 | NR_024400   | ANAPC13  | anaphase promoting complex sub       | 0.130  | 1.094 | 3.19E-01 | 3.19E+01 |  |  |
| 8090872 | NM_178554   | KY       | kyphoscoliosis peptidase             | 0.061  | 1.043 | 5.54E-01 | 5.54E+01 |  |  |
| 8090891 | NM_004441   | EPHB1    | EPH receptor B1                      | -0.038 | 0.974 | 7.71E-01 | 7.71E+01 |  |  |
| 8090893 | NM_018133   | MSL2     | male-specific lethal 2 homolog (Dr   | -0.090 | 0.940 | 5.56E-01 | 5.56E+01 |  |  |
| 8090898 | NM_005862   | STAG1    | stromal antigen 1                    | 0.012  | 1.008 | 9.50E-01 | 9.50E+01 |  |  |
| 8090934 | ---         | ---      | ---                                  | -0.148 | 0.902 | 6.66E-01 | 6.66E+01 |  |  |
| 8090936 | ---         | ---      | ---                                  | -0.078 | 0.948 | 3.03E-01 | 3.03E+01 |  |  |
| 8090938 | NM_173543   | DZIP1L   | DAZ interacting protein 1-like       | 0.006  | 1.004 | 9.80E-01 | 9.80E+01 |  |  |
| 8090960 | NM_016216   | DBR1     | debranching enzyme homolog 1 (S      | 0.127  | 1.092 | 2.37E-01 | 2.37E+01 |  |  |
| 8090972 | NM_178130   | TXNDC6   | thioredoxin domain containing 6      | 0.009  | 1.006 | 9.56E-01 | 9.56E+01 |  |  |
| 8091009 | NM_006219   | PIK3CB   | phosphoinositide-3-kinase, catalyt   | 0.046  | 1.033 | 8.82E-01 | 8.82E+01 |  |  |
| 8091037 | NM_00113465 | PRR23A   | proline rich 23A                     | -0.081 | 0.946 | 5.77E-01 | 5.77E+01 |  |  |
| 8091048 | NR_023350   | COPB2    | coatamer protein complex, subun      | 0.060  | 1.042 | 6.83E-01 | 6.83E+01 |  |  |
| 8091071 | NM_004164   | RBP2     | retinol binding protein 2, cellular  | -0.028 | 0.981 | 9.00E-01 | 9.00E+01 |  |  |
| 8091078 | NM_002899   | RBP1     | retinol binding protein 1, cellular  | 0.183  | 1.135 | 1.13E-01 | 1.13E+01 |  |  |
| 8091087 | NM_178177   | NMNAT3   | nicotinamide nucleotide adenyllyl    | 0.006  | 1.004 | 9.74E-01 | 9.74E+01 |  |  |
| 8091095 | ---         | ---      | ---                                  | -0.045 | 0.969 | 7.95E-01 | 7.95E+01 |  |  |
| 8091103 | NM_006286   | TFDP2    | transcription factor Dp-2 (E2F dim   | 0.017  | 1.012 | 9.56E-01 | 9.56E+01 |  |  |
| 8091118 | ---         | ---      | ---                                  | 0.096  | 1.069 | 6.66E-01 | 6.66E+01 |  |  |
| 8091120 | NM_00103954 | GK5      | glycerol kinase 5 (putative)         | -0.057 | 0.961 | 8.62E-01 | 8.62E+01 |  |  |
| 8091141 | NM_019001   | XRN1     | 5'-3' exoribonuclease 1              | 0.047  | 1.033 | 7.51E-01 | 7.51E+01 |  |  |
| 8091190 | NM_001184   | ATR      | ataxia telangiectasia and Rad3 rela  | 0.017  | 1.012 | 9.29E-01 | 9.29E+01 |  |  |
| 8091241 | ---         | ---      | ---                                  | -0.120 | 0.920 | 7.92E-01 | 7.92E+01 |  |  |
| 8091260 | NM_173653   | SLC9A9   | solute carrier family 9 (sodium/hy   | 0.120  | 1.086 | 3.96E-01 | 3.96E+01 |  |  |
| 8091327 | NM_021105   | PLSCR1   | phospholipid scramblase 1            | 0.349  | 1.274 | 3.60E-01 | 3.60E+01 |  |  |
| 8091352 | NM_020131   | UBQLN4   | ubiquilin 4                          | -0.018 | 0.988 | 9.58E-01 | 9.58E+01 |  |  |
| 8091432 | NM_016094   | COMMD2   | COMM domain containing 2             | -0.047 | 0.968 | 8.67E-01 | 8.67E+01 |  |  |
| 8091444 | ---         | ---      | ---                                  | 0.098  | 1.071 | 6.77E-01 | 6.77E+01 |  |  |
| 8091452 | NM_00107980 | TMEM183B | transmembrane protein 183B           | 0.001  | 1.001 | 9.94E-01 | 9.94E+01 |  |  |

|         |              |              |                                       |        |       |          |          |  |  |
|---------|--------------|--------------|---------------------------------------|--------|-------|----------|----------|--|--|
| 8091458 | NM_014445    | SERP1        | stress-associated endoplasmic ret     | 0.094  | 1.067 | 2.94E-01 | 2.94E+01 |  |  |
| 8091485 | NM_005067    | SIAH2        | seven in absentia homolog 2 (Dros     | -0.019 | 0.987 | 8.62E-01 | 8.62E+01 |  |  |
| 8091503 | NM_013308    | GPR171       | G protein-coupled receptor 171        | -0.259 | 0.836 | 1.56E-02 | 1.56E+00 |  |  |
| 8091546 | NM_00112322  | TMEM14E      | transmembrane protein 14E             | 0.129  | 1.093 | 4.27E-01 | 4.27E+01 |  |  |
| 8091550 | NM_020776    | KIAA1328     | KIAA1328                              | -0.032 | 0.978 | 9.54E-01 | 9.54E+01 |  |  |
| 8091552 | ---          | ---          | ---                                   | 0.081  | 1.058 | 3.17E-01 | 3.17E+01 |  |  |
| 8091554 | ---          | ---          | ---                                   | 0.015  | 1.011 | 9.53E-01 | 9.53E+01 |  |  |
| 8091562 | NM_020865    | DHX36        | DEAH (Asp-Glu-Ala-His) box polype     | 0.034  | 1.024 | 7.57E-01 | 7.57E+01 |  |  |
| 8091588 | NM_00103870  | GPR149       | G protein-coupled receptor 149        | -0.061 | 0.958 | 6.83E-01 | 6.83E+01 |  |  |
| 8091595 | AK128002     | FLJ46120     | hypothetical LOC647008                | 0.018  | 1.013 | 8.84E-01 | 8.84E+01 |  |  |
| 8091637 | NM_004733    | SLC33A1      | solute carrier family 33 (acetyl-Co   | 0.167  | 1.123 | 4.47E-02 | 4.47E+00 |  |  |
| 8091648 | NM_007107    | SSR3         | signal sequence receptor, gamma       | 0.077  | 1.055 | 6.52E-01 | 6.52E+01 |  |  |
| 8091656 | NM_00111352  | B3GALNT1     | beta-1,3-N-acetylgalactosaminyltr     | 0.099  | 1.071 | 7.52E-01 | 7.52E+01 |  |  |
| 8091658 | NM_020307    | CCNL1        | cyclin L1                             | -0.039 | 0.974 | 7.73E-01 | 7.73E+01 |  |  |
| 8091676 | ---          | ---          | ---                                   | -0.024 | 0.984 | 9.21E-01 | 9.21E+01 |  |  |
| 8091696 | ---          | ---          | ---                                   | -0.041 | 0.972 | 7.34E-01 | 7.34E+01 |  |  |
| 8091764 | NM_002268    | KPNA4        | karyopherin alpha 4 (importin alfa    | 0.028  | 1.020 | 8.47E-01 | 8.47E+01 |  |  |
| 8091778 | NR_003001    | SCARNA7      | small Cajal body-specific RNA 7       | 0.064  | 1.046 | 8.78E-01 | 8.78E+01 |  |  |
| 8091780 | NM_00103862  | B3GALNT1     | beta-1,3-N-acetylgalactosaminyltr     | 0.037  | 1.026 | 8.31E-01 | 8.31E+01 |  |  |
| 8091806 | NM_000984    | RPL23A       | ribosomal protein L23a                | -0.016 | 0.989 | 8.96E-01 | 8.96E+01 |  |  |
| 8091809 | ---          | ---          | ---                                   | -0.072 | 0.952 | 6.66E-01 | 6.66E+01 |  |  |
| 8091941 | NM_007217    | PDCD10       | programmed cell death 10              | -0.003 | 0.998 | 9.88E-01 | 9.88E+01 |  |  |
| 8092000 | NR_001566    | TERC         | telomerase RNA component              | -0.106 | 0.929 | 6.46E-01 | 6.46E+01 |  |  |
| 8092035 | NM_024947    | PHC3         | polyhomeotic homolog 3 (Drosophi      | 0.034  | 1.024 | 8.16E-01 | 8.16E+01 |  |  |
| 8092065 | ---          | ---          | ---                                   | -0.114 | 0.924 | 2.72E-01 | 2.72E+01 |  |  |
| 8092067 | NM_00109964  | RPL22L1      | ribosomal protein L22-like 1          | 0.195  | 1.145 | 3.41E-01 | 3.41E+01 |  |  |
| 8092073 | NM_020390    | EIF5A2       | eukaryotic translation initiation fa  | -0.010 | 0.993 | 9.66E-01 | 9.66E+01 |  |  |
| 8092081 | ---          | ---          | ---                                   | 0.021  | 1.015 | 9.27E-01 | 9.27E+01 |  |  |
| 8092095 | NM_015028    | TNIK         | TRAF2 and NCK interacting kinase      | 0.110  | 1.080 | 3.69E-01 | 3.69E+01 |  |  |
| 8092132 | ---          | ---          | ---                                   | 0.000  | 1.000 | 1.00E+00 | 1.00E+02 |  |  |
| 8092162 | ENST00000331 | PP13439      | hypothetical LOC100128046             | -0.259 | 0.836 | 1.31E-02 | 1.31E+00 |  |  |
| 8092165 | NM_198407    | GHSR         | growth hormone secretagogue rec       | 0.054  | 1.038 | 6.60E-01 | 6.60E+01 |  |  |
| 8092201 | NM_024665    | TBL1XR1      | transducin (beta)-like 1 X-linked re  | 0.071  | 1.051 | 4.90E-01 | 4.90E+01 |  |  |
| 8092218 | ---          | ---          | ---                                   | 0.061  | 1.043 | 8.36E-01 | 8.36E+01 |  |  |
| 8092228 | ---          | ---          | ---                                   | 0.062  | 1.044 | 6.11E-01 | 6.11E+01 |  |  |
| 8092230 | NM_022470    | ZMAT3        | zinc finger, matrix type 3            | -0.028 | 0.981 | 8.91E-01 | 8.91E+01 |  |  |
| 8092239 | ---          | ---          | ---                                   | 0.069  | 1.049 | 7.78E-01 | 7.78E+01 |  |  |
| 8092241 | NM_171830    | KCNMB3       | potassium large conductance calci     | -0.040 | 0.973 | 8.24E-01 | 8.24E+01 |  |  |
| 8092265 | NM_020409    | MRPL47       | mitochondrial ribosomal protein L     | -0.034 | 0.977 | 8.79E-01 | 8.79E+01 |  |  |
| 8092314 | NM_145261    | DNAJC19      | DnaJ (Hsp40) homolog, subfamily       | 0.040  | 1.028 | 7.98E-01 | 7.98E+01 |  |  |
| 8092321 | NM_020640    | DCUN1D1      | DCN1, defective in cullin neddylat    | 0.046  | 1.033 | 7.97E-01 | 7.97E+01 |  |  |
| 8092328 | NM_020166    | MCCC1        | methylcrotonoyl-Coenzyme A carb       | 0.073  | 1.052 | 6.42E-01 | 6.42E+01 |  |  |
| 8092358 | NM_015078    | MCF2L2       | MCF.2 cell line derived transformi    | -0.036 | 0.976 | 8.80E-01 | 8.80E+01 |  |  |
| 8092390 | ---          | ---          | ---                                   | 0.237  | 1.179 | 2.38E-01 | 2.38E+01 |  |  |
| 8092392 | NM_130446    | KLHL6        | kelch-like 6 (Drosophila)             | 0.049  | 1.034 | 7.32E-01 | 7.32E+01 |  |  |
| 8092404 | NM_024871    | MAP6D1       | MAP6 domain containing 1              | 0.038  | 1.026 | 7.15E-01 | 7.15E+01 |  |  |
| 8092409 | NM_018622    | PARL         | presenilin associated, rhomboid-li    | 0.101  | 1.073 | 2.83E-01 | 2.83E+01 |  |  |
| 8092418 | NM_005688    | ABCC5        | ATP-binding cassette, sub-family C    | 0.122  | 1.088 | 4.04E-01 | 4.04E+01 |  |  |
| 8092455 | ---          | ---          | ---                                   | -0.011 | 0.993 | 9.56E-01 | 9.56E+01 |  |  |
| 8092457 | NM_005787    | ALG3         | asparagine-linked glycosylation 3,    | 0.044  | 1.031 | 6.57E-01 | 6.57E+01 |  |  |
| 8092468 | NM_033259    | CAMK2N2      | calcium/calmodulin-dependent pr       | -0.048 | 0.967 | 4.85E-01 | 4.85E+01 |  |  |
| 8092473 | NM_004366    | CLCN2        | chloride channel 2                    | -0.035 | 0.976 | 7.54E-01 | 7.54E+01 |  |  |
| 8092501 | NM_000460    | THPO         | thrombopoietin                        | 0.020  | 1.014 | 8.63E-01 | 8.63E+01 |  |  |
| 8092514 | NM_022149    | MAGEF1       | melanoma antigen family F, 1          | 0.055  | 1.039 | 5.60E-01 | 5.60E+01 |  |  |
| 8092532 | ---          | ---          | ---                                   | -0.047 | 0.968 | 7.88E-01 | 7.88E+01 |  |  |
| 8092534 | NM_080652    | TMEM41A      | transmembrane protein 41A             | 0.051  | 1.036 | 7.36E-01 | 7.36E+01 |  |  |
| 8092552 | NM_006548    | IGF2BP2      | insulin-like growth factor 2 mRNA     | 0.045  | 1.031 | 8.74E-01 | 8.74E+01 |  |  |
| 8092564 | NM_004593    | TRA2B        | transformer 2 beta homolog (Dros      | -0.037 | 0.974 | 7.87E-01 | 7.87E+01 |  |  |
| 8092596 | NM_001346    | DGKG         | diacylglycerol kinase, gamma 90kD     | 0.005  | 1.004 | 9.83E-01 | 9.83E+01 |  |  |
| 8092621 | NM_017541    | CRYGS        | crystallin, gamma 5                   | 0.042  | 1.029 | 8.77E-01 | 8.77E+01 |  |  |
| 8092627 | NM_018138    | TBCCD1       | TBCC domain containing 1              | 0.029  | 1.020 | 8.83E-01 | 8.83E+01 |  |  |
| 8092640 | NM_002916    | RFC4         | replication factor C (activator 1) 4, | 0.012  | 1.009 | 9.70E-01 | 9.70E+01 |  |  |
| 8092661 | NM_001879    | MASP1        | mannan-binding lectin serine pept     | -0.056 | 0.962 | 6.46E-01 | 6.46E+01 |  |  |
| 8092682 | NM_001048    | SST          | somatostatin                          | -0.009 | 0.994 | 9.57E-01 | 9.57E+01 |  |  |
| 8092686 | NM_00100431  | RTP2         | receptor (chemosensory) transpor      | -0.049 | 0.966 | 7.14E-01 | 7.14E+01 |  |  |
| 8092691 | NM_001706    | BCL6         | B-cell CLL/lymphoma 6                 | 0.017  | 1.012 | 9.53E-01 | 9.53E+01 |  |  |
| 8092702 | AF315716     | LOC100132319 | hypothetical LOC100132319             | 0.051  | 1.036 | 9.27E-01 | 9.27E+01 |  |  |
| 8092765 | NM_178496    | C3orf59      | chromosome 3 open reading fram        | -0.253 | 0.839 | 2.64E-01 | 2.64E+01 |  |  |
| 8092834 | ---          | ---          | ---                                   | 0.076  | 1.054 | 4.63E-01 | 4.63E+01 |  |  |
| 8092836 | NM_00108051  | CPN2         | carboxypeptidase N, polypeptide 2     | 0.042  | 1.030 | 7.27E-01 | 7.27E+01 |  |  |
| 8092839 | NM_00113505  | LRRC15       | leucine rich repeat containing 15     | -0.011 | 0.992 | 9.63E-01 | 9.63E+01 |  |  |
| 8092845 | NM_004488    | GP5          | glycoprotein V (platelet)             | 0.010  | 1.007 | 9.55E-01 | 9.55E+01 |  |  |
| 8092883 | ---          | ---          | ---                                   | -0.265 | 0.832 | 6.30E-02 | 6.30E+00 |  |  |
| 8092888 | NM_138399    | TMEM44       | transmembrane protein 44              | -0.028 | 0.981 | 8.17E-01 | 8.17E+01 |  |  |
| 8092905 | NM_018385    | LSG1         | large subunit GTPase 1 homolog (S     | 0.011  | 1.008 | 9.64E-01 | 9.64E+01 |  |  |
| 8092922 | NM_152531    | C3orf21      | chromosome 3 open reading fram        | 0.002  | 1.001 | 9.89E-01 | 9.89E+01 |  |  |
| 8092931 | ---          | ---          | ---                                   | 0.029  | 1.021 | 8.56E-01 | 8.56E+01 |  |  |

|         |             |          |                                      |        |       |          |          |  |  |
|---------|-------------|----------|--------------------------------------|--------|-------|----------|----------|--|--|
| 8092933 | NM_012287   | ACAP2    | ArfGAP with coiled-coil, ankyrin re  | 0.151  | 1.110 | 8.35E-02 | 8.35E+00 |  |  |
| 8092957 | ---         | ---      | ---                                  | 0.096  | 1.069 | 7.16E-01 | 7.16E+01 |  |  |
| 8092959 | NM_006241   | PPP1R2   | protein phosphatase 1, regulatory    | -0.027 | 0.981 | 8.55E-01 | 8.55E+01 |  |  |
| 8092968 | ---         | ---      | ---                                  | 0.002  | 1.002 | 9.94E-01 | 9.94E+01 |  |  |
| 8092978 | NM_018406   | MUC4     | mucin 4, cell surface associated     | 0.001  | 1.001 | 9.96E-01 | 9.96E+01 |  |  |
| 8093013 | NM_005781   | TNKG     | tyrosine kinase, non-receptor, 2     | -0.062 | 0.958 | 5.53E-01 | 5.53E+01 |  |  |
| 8093035 | ---         | ---      | ---                                  | -0.040 | 0.973 | 8.63E-01 | 8.63E+01 |  |  |
| 8093039 | NR_003264   | SDHALP1  | succinate dehydrogenase complex      | -0.052 | 0.965 | 7.44E-01 | 7.44E+01 |  |  |
| 8093053 | NM_003234   | TFRC     | transferrin receptor (p90, CD71)     | -0.015 | 0.990 | 9.72E-01 | 9.72E+01 |  |  |
| 8093074 | NM_00103961 | ZDHHC19  | zinc finger, DHHC-type containing    | 0.051  | 1.036 | 5.99E-01 | 5.99E+01 |  |  |
| 8093086 | NM_005017   | PCYT1A   | phosphate cytidylyltransferase 1, c  | 0.072  | 1.051 | 7.51E-01 | 7.51E+01 |  |  |
| 8093104 | NM_138461   | TM4SF19  | transmembrane 4 L six family mem     | -0.334 | 0.794 | 1.47E-01 | 1.47E+01 |  |  |
| 8093112 | NM_015562   | UBXN7    | UBX domain protein 7                 | -0.020 | 0.986 | 9.33E-01 | 9.33E+01 |  |  |
| 8093126 | ---         | ---      | ---                                  | -0.076 | 0.949 | 8.78E-01 | 8.78E+01 |  |  |
| 8093128 | ---         | ---      | ---                                  | -0.034 | 0.977 | 8.79E-01 | 8.79E+01 |  |  |
| 8093130 | NM_152617   | RNF168   | ring finger protein 168              | -0.120 | 0.920 | 8.33E-02 | 8.33E+00 |  |  |
| 8093141 | NM_182627   | WDR53    | WD repeat domain 53                  | -0.064 | 0.957 | 6.98E-01 | 6.98E+01 |  |  |
| 8093150 | ---         | ---      | ---                                  | -0.007 | 0.995 | 9.81E-01 | 9.81E+01 |  |  |
| 8093156 | NM_007362   | NCBP2    | nuclear cap binding protein subun    | 0.010  | 1.007 | 9.63E-01 | 9.63E+01 |  |  |
| 8093171 | NM_005929   | MF12     | antigen p97 (melanoma associat       | -0.078 | 0.947 | 3.67E-01 | 3.67E+01 |  |  |
| 8093191 | NM_00109842 | DLG1     | discs, large homolog 1 (Drosophila   | -0.005 | 0.997 | 9.82E-01 | 9.82E+01 |  |  |
| 8093219 | NM_203314   | BDH1     | 3-hydroxybutyrate dehydrogenase      | 0.001  | 1.001 | 9.95E-01 | 9.95E+01 |  |  |
| 8093230 | NM_00114564 | KIAA0226 | KIAA0226                             | -0.013 | 0.991 | 9.54E-01 | 9.54E+01 |  |  |
| 8093256 | ---         | ---      | ---                                  | -0.037 | 0.975 | 8.33E-01 | 8.33E+01 |  |  |
| 8093258 | NM_032263   | IQCG     | IQ motif containing G                | -0.002 | 0.999 | 9.97E-01 | 9.97E+01 |  |  |
| 8093314 | NM_004547   | NDUFB4   | NDH dehydrogenase (ubiquinone        | -0.050 | 0.966 | 7.45E-01 | 7.45E+01 |  |  |
| 8093330 | ---         | ---      | ---                                  | 0.037  | 1.026 | 9.49E-01 | 9.49E+01 |  |  |
| 8093336 | NM_003441   | ZNF141   | zinc finger protein 141              | 0.114  | 1.083 | 4.99E-01 | 4.99E+01 |  |  |
| 8093343 | NM_00112717 | PIGG     | phosphatidylinositol glycan ancho    | 0.060  | 1.043 | 5.31E-01 | 5.31E+01 |  |  |
| 8093360 | NM_000283   | PDE6B    | phosphodiesterase 6B, cGMP-spec      | -0.055 | 0.963 | 6.31E-01 | 6.31E+01 |  |  |
| 8093386 | NM_002477   | MYL5     | myosin, light chain 5, regulatory    | -0.075 | 0.949 | 5.47E-01 | 5.47E+01 |  |  |
| 8093398 | NM_006315   | PCGF3    | polycomb group ring finger 3         | -0.057 | 0.961 | 5.09E-01 | 5.09E+01 |  |  |
| 8093413 | NM_032326   | TMEM175  | transmembrane protein 175            | 0.098  | 1.070 | 3.07E-01 | 3.07E+01 |  |  |
| 8093425 | NM_000203   | IDUA     | iduronidase, alpha-L-                | -0.025 | 0.983 | 8.68E-01 | 8.68E+01 |  |  |
| 8093440 | NM_00100435 | FGFRL1   | fibroblast growth factor receptor-1  | -0.089 | 0.940 | 2.83E-01 | 2.83E+01 |  |  |
| 8093456 | NM_052861   | C4orf42  | chromosome 4 open reading fram       | 0.014  | 1.010 | 9.74E-01 | 9.74E+01 |  |  |
| 8093462 | NM_00101740 | MAEA     | macrophage erythroblast attache      | -0.091 | 0.939 | 3.75E-01 | 3.75E+01 |  |  |
| 8093476 | NM_020894   | KIAA1530 | KIAA1530                             | -0.011 | 0.993 | 9.52E-01 | 9.52E+01 |  |  |
| 8093494 | NM_175918   | CRIPAK   | cysteine-rich PAK1 inhibitor         | 0.066  | 1.047 | 7.44E-01 | 7.44E+01 |  |  |
| 8093500 | NM_006342   | TACC3    | transforming, acidic coiled-coil coi | -0.054 | 0.963 | 7.97E-01 | 7.97E+01 |  |  |
| 8093518 | NM_000142   | FGFR3    | fibroblast growth factor receptor 3  | -0.017 | 0.988 | 9.03E-01 | 9.03E+01 |  |  |
| 8093539 | NM_133330   | WHSC1    | Wolf-Hirschhorn syndrome candid      | 0.013  | 1.009 | 9.22E-01 | 9.22E+01 |  |  |
| 8093576 | NR_003004   | SCARNA22 | small Cajal body-specific RNA 22     | 0.167  | 1.123 | 1.70E-01 | 1.70E+01 |  |  |
| 8093590 | NM_002938   | RNF4     | ring finger protein 4                | 0.029  | 1.020 | 8.05E-01 | 8.05E+01 |  |  |
| 8093601 | NM_003704   | C4orf8   | chromosome 4 open reading fram       | -0.050 | 0.966 | 6.08E-01 | 6.08E+01 |  |  |
| 8093624 | NM_00114585 | SH3BP2   | SH3-domain binding protein 2         | 0.048  | 1.034 | 7.59E-01 | 7.59E+01 |  |  |
| 8093643 | NM_176801   | ADD1     | adducin 1 (alpha)                    | -0.017 | 0.988 | 9.19E-01 | 9.19E+01 |  |  |
| 8093683 | ---         | ---      | ---                                  | 0.213  | 1.159 | 3.60E-01 | 3.60E+01 |  |  |
| 8093685 | NM_002111   | HTT      | huntingtin                           | 0.024  | 1.017 | 8.78E-01 | 8.78E+01 |  |  |
| 8093764 | NM_198229   | RGS12    | regulator of G-protein signaling 12  | 0.049  | 1.034 | 5.99E-01 | 5.99E+01 |  |  |
| 8093792 | NM_001528   | HGFAC    | HGF activator                        | 0.002  | 1.001 | 9.91E-01 | 9.91E+01 |  |  |
| 8093807 | NM_173660   | DOK7     | docking protein 7                    | -0.032 | 0.978 | 7.59E-01 | 7.59E+01 |  |  |
| 8093826 | NM_000683   | ADRA2C   | adrenergic, alpha-2C-, receptor      | -0.036 | 0.976 | 7.37E-01 | 7.37E+01 |  |  |
| 8093829 | NM_145291   | ZNF509   | zinc finger protein 509              | 0.077  | 1.055 | 7.73E-01 | 7.73E+01 |  |  |
| 8093839 | NM_014392   | D4S234E  | DNA segment on chromosome 4 (        | 0.056  | 1.039 | 7.87E-01 | 7.87E+01 |  |  |
| 8093852 | NM_002448   | MSX1     | msh homeobox 1                       | -0.001 | 1.000 | 9.97E-01 | 9.97E+01 |  |  |
| 8093872 | NM_005750   | C4orf6   | chromosome 4 open reading fram       | 0.016  | 1.011 | 9.45E-01 | 9.45E+01 |  |  |
| 8093878 | NM_153717   | EVC      | Ellis van Creveld syndrome           | -0.031 | 0.979 | 8.34E-01 | 8.34E+01 |  |  |
| 8093916 | NM_015274   | MAN2B2   | mannosidase, alpha, class 2B, mem    | -0.047 | 0.968 | 5.48E-01 | 5.48E+01 |  |  |
| 8093936 | NM_033296   | MRFAP1   | Mof4 family associated protein 1     | -0.036 | 0.975 | 7.47E-01 | 7.47E+01 |  |  |
| 8093943 | AK026375    | LOC93622 | hypothetical LOC93622                | -0.113 | 0.925 | 4.02E-01 | 4.02E+01 |  |  |
| 8093950 | NM_005980   | S100P    | S100 calcium binding protein P       | 0.032  | 1.022 | 8.32E-01 | 8.32E+01 |  |  |
| 8093957 | NM_018366   | CNO      | cappuccino homolog (mouse)           | -0.021 | 0.985 | 9.25E-01 | 9.25E+01 |  |  |
| 8093961 | NM_014743   | KIAA0232 | KIAA0232                             | -0.037 | 0.975 | 8.27E-01 | 8.27E+01 |  |  |
| 8093976 | NM_020773   | TBC1D14  | TBC1 domain family, member 14        | 0.211  | 1.158 | 6.06E-02 | 6.06E+00 |  |  |
| 8093993 | NM_152293   | TADA2B   | transcriptional adaptor 2 (ADA2 h    | -0.027 | 0.982 | 8.92E-01 | 8.92E+01 |  |  |
| 8093997 | NM_020777   | SORCS2   | sortilin-related VPS10 domain con    | -0.063 | 0.957 | 5.53E-01 | 5.53E+01 |  |  |
| 8094026 | ---         | ---      | ---                                  | 0.049  | 1.035 | 7.57E-01 | 7.57E+01 |  |  |
| 8094028 | NM_198595   | AFAP1    | actin filament associated protein 1  | 0.002  | 1.001 | 9.92E-01 | 9.92E+01 |  |  |
| 8094030 | NM_198595   | AFAP1    | actin filament associated protein 1  | 0.002  | 1.001 | 9.90E-01 | 9.90E+01 |  |  |
| 8094032 | NM_018986   | SH3TC1   | SH3 domain and tetatricopeptide      | 0.033  | 1.023 | 7.81E-01 | 7.81E+01 |  |  |
| 8094056 | NM_053044   | HTRA3    | HtrA serine peptidase 3              | -0.003 | 0.998 | 9.85E-01 | 9.85E+01 |  |  |
| 8094068 | ---         | ---      | ---                                  | 0.006  | 1.004 | 9.85E-01 | 9.85E+01 |  |  |
| 8094070 | BC035655    | C4orf23  | chromosome 4 open reading fram       | 0.027  | 1.019 | 8.78E-01 | 8.78E+01 |  |  |
| 8094086 | ---         | ---      | ---                                  | -0.060 | 0.960 | 6.78E-01 | 6.78E+01 |  |  |
| 8094093 | NM_080819   | GPR78    | G protein-coupled receptor 78        | -0.029 | 0.980 | 8.30E-01 | 8.30E+01 |  |  |
| 8094101 | NM_00101444 | CPZ      | carboxypeptidase Z                   | 0.026  | 1.018 | 8.58E-01 | 8.58E+01 |  |  |



|         |              |           |                                      |        |       |          |          |  |  |
|---------|--------------|-----------|--------------------------------------|--------|-------|----------|----------|--|--|
| 8094116 | NM_00110566  | USP17     | ubiquitin specific peptidase 17      | 0.000  | 1.000 | 1.00E+00 | 1.00E+02 |  |  |
| 8094118 | NM_00110566  | USP17     | ubiquitin specific peptidase 17      | 0.000  | 1.000 | 1.00E+00 | 1.00E+02 |  |  |
| 8094120 | NM_00110566  | USP17     | ubiquitin specific peptidase 17      | 0.000  | 1.000 | 1.00E+00 | 1.00E+02 |  |  |
| 8094122 | NM_00110566  | USP17     | ubiquitin specific peptidase 17      | 0.003  | 1.002 | 9.88E-01 | 9.88E+01 |  |  |
| 8094124 | NM_00110566  | USP17     | ubiquitin specific peptidase 17      | 0.000  | 1.000 | 1.00E+00 | 1.00E+02 |  |  |
| 8094126 | NM_00110566  | USP17     | ubiquitin specific peptidase 17      | 0.000  | 1.000 | 1.00E+00 | 1.00E+02 |  |  |
| 8094128 | NM_00110566  | USP17     | ubiquitin specific peptidase 17      | 0.000  | 1.000 | 1.00E+00 | 1.00E+02 |  |  |
| 8094130 | NM_00110566  | USP17     | ubiquitin specific peptidase 17      | 0.005  | 1.003 | 9.84E-01 | 9.84E+01 |  |  |
| 8094132 | NM_00110566  | USP17     | ubiquitin specific peptidase 17      | 0.000  | 1.000 | 1.00E+00 | 1.00E+02 |  |  |
| 8094134 | NR_027279    | USP17L6P  | ubiquitin specific peptidase 17-like | 0.058  | 1.041 | 7.40E-01 | 7.40E+01 |  |  |
| 8094136 | NM_00100203  | DEFB108B  | defensin, beta 108B                  | 0.013  | 1.009 | 9.74E-01 | 9.74E+01 |  |  |
| 8094144 | NM_030930    | UNC93B1   | unc-93 homolog B1 (C. elegans)       | 0.000  | 1.000 | 9.99E-01 | 9.99E+01 |  |  |
| 8094148 | ---          | ---       | ---                                  | -0.087 | 0.941 | 5.56E-01 | 5.56E+01 |  |  |
| 8094154 | AF073924     | OR7E35P   | olfactory receptor, family 7, subfa  | -0.068 | 0.954 | 6.13E-01 | 6.13E+01 |  |  |
| 8094156 | NM_000798    | DRD5      | dopamine receptor D5                 | -0.020 | 0.986 | 9.09E-01 | 9.09E+01 |  |  |
| 8094165 | NR_003132    | HSP90AB2P | heat shock protein 90kDa alpha (c    | -0.062 | 0.958 | 7.16E-01 | 7.16E+01 |  |  |
| 8094169 | NM_182485    | CPEB2     | cytoplasmic polyadenylation elem     | 0.005  | 1.004 | 9.84E-01 | 9.84E+01 |  |  |
| 8094228 | NM_004334    | BST1      | bone marrow stromal cell antigen     | 0.237  | 1.179 | 2.18E-01 | 2.18E+01 |  |  |
| 8094240 | NM_001775    | CD38      | CD38 molecule                        | 0.530  | 1.443 | 5.36E-02 | 5.36E+00 |  |  |
| 8094251 | NR_027696    | FLJ39653  | hypothetical FLJ39653                | 0.028  | 1.020 | 8.50E-01 | 8.50E+01 |  |  |
| 8094271 | NM_025205    | MED28     | mediator complex subunit 28          | -0.036 | 0.975 | 8.34E-01 | 8.34E+01 |  |  |
| 8094342 | NM_145048    | PACRGL    | PARK2 co-regulated-like              | 0.148  | 1.108 | 1.90E-01 | 1.90E+01 |  |  |
| 8094355 | ---          | ---       | ---                                  | 0.163  | 1.120 | 6.64E-02 | 6.64E+00 |  |  |
| 8094372 | NM_003102    | SOD3      | superoxide dismutase 3, extracellu   | -0.106 | 0.929 | 1.31E-01 | 1.31E+01 |  |  |
| 8094378 | NM_018323    | PI4K2B    | phosphatidylinositol 4-kinase type   | 0.068  | 1.048 | 5.98E-01 | 5.98E+01 |  |  |
| 8094408 | NM_013367    | ANAPC4    | anaphase promoting complex sub       | 0.040  | 1.028 | 8.21E-01 | 8.21E+01 |  |  |
| 8094456 | NM_00114543  | LOC389203 | hypothetical protein LOC389203       | 0.090  | 1.064 | 7.39E-01 | 7.39E+01 |  |  |
| 8094460 | NM_005349    | RBPJ      | recombination signal binding prot    | 0.013  | 1.009 | 9.53E-01 | 9.53E+01 |  |  |
| 8094476 | NM_018317    | TBC1D19   | TBC1 domain family, member 19        | -0.005 | 0.996 | 9.88E-01 | 9.88E+01 |  |  |
| 8094499 | ---          | ---       | ---                                  | -0.103 | 0.931 | 6.69E-01 | 6.69E+01 |  |  |
| 8094501 | NM_020860    | STIM2     | stromal interaction molecule 2       | 0.083  | 1.059 | 4.69E-01 | 4.69E+01 |  |  |
| 8094533 | AK304357     | FLJ16686  | FLJ16686 protein                     | 0.239  | 1.180 | 6.58E-01 | 6.58E+01 |  |  |
| 8094556 | NM_018290    | PGM2      | phosphoglucomutase 2                 | 0.175  | 1.129 | 1.07E-01 | 1.07E+01 |  |  |
| 8094574 | NM_015173    | TBC1D1    | TBC1 (tre-2/USP6, BUB2, cdc16) d     | 0.201  | 1.149 | 2.08E-02 | 2.08E+00 |  |  |
| 8094599 | NM_016531    | KLF3      | Kruppel-like factor 3 (basic)        | 0.077  | 1.055 | 5.62E-01 | 5.62E+01 |  |  |
| 8094625 | NM_015990    | KLHL5     | kelch-like 5 (Drosophila)            | -0.019 | 0.987 | 9.44E-01 | 9.44E+01 |  |  |
| 8094679 | NM_175737    | KLB       | klotho beta                          | -0.033 | 0.977 | 7.76E-01 | 7.76E+01 |  |  |
| 8094701 | NR_026854    | LOC401127 | WD repeat domain 5 pseudogene        | -0.021 | 0.986 | 9.26E-01 | 9.26E+01 |  |  |
| 8094704 | NM_005339    | UBE2K     | ubiquitin-conjugating enzyme E2K     | -0.012 | 0.992 | 9.28E-01 | 9.28E+01 |  |  |
| 8094717 | ---          | ---       | ---                                  | 0.053  | 1.037 | 8.97E-01 | 8.97E+01 |  |  |
| 8094719 | NM_018177    | N4BP2     | NEDD4 binding protein 2              | 0.039  | 1.027 | 8.57E-01 | 8.57E+01 |  |  |
| 8094741 | ---          | ---       | ---                                  | -0.023 | 0.984 | 9.53E-01 | 9.53E+01 |  |  |
| 8094743 | NM_004310    | RHOH      | ras homolog gene family, member      | -0.217 | 0.860 | 5.53E-02 | 5.53E+00 |  |  |
| 8094830 | NM_018126    | TMEM33    | transmembrane protein 33             | 0.097  | 1.069 | 2.50E-01 | 2.50E+01 |  |  |
| 8094848 | NM_006345    | SLC30A9   | solute carrier family 30 (zinc trans | 0.036  | 1.026 | 8.23E-01 | 8.23E+01 |  |  |
| 8094870 | NM_00108050  | SHISA3    | shisa homolog 3 (Xenopus laevis)     | -0.029 | 0.980 | 9.16E-01 | 9.16E+01 |  |  |
| 8094872 | ---          | ---       | ---                                  | 0.029  | 1.020 | 8.33E-01 | 8.33E+01 |  |  |
| 8094874 | ---          | ---       | ---                                  | -0.072 | 0.951 | 5.49E-01 | 5.49E+01 |  |  |
| 8094876 | NM_021927    | GUF1      | GUF1 GTPase homolog (S. cerevisi     | 0.112  | 1.081 | 2.37E-01 | 2.37E+01 |  |  |
| 8094938 | NM_207330    | NIPAL1    | NIPA-like domain containing 1        | 0.067  | 1.047 | 2.76E-01 | 2.76E+01 |  |  |
| 8094948 | NM_020846    | SLAIN2    | SLAIN motif family, member 2         | -0.086 | 0.942 | 2.21E-01 | 2.21E+01 |  |  |
| 8094960 | NM_152679    | SLC10A4   | solute carrier family 10 (sodium/b   | -0.030 | 0.980 | 8.10E-01 | 8.10E+01 |  |  |
| 8094968 | NM_175619    | ZAR1      | zygote arrest 1                      | -0.084 | 0.943 | 4.19E-01 | 4.19E+01 |  |  |
| 8094974 | NM_00107983  | OCIA1     | OCIA domain containing 1             | -0.038 | 0.974 | 7.86E-01 | 7.86E+01 |  |  |
| 8095005 | ---          | ---       | ---                                  | -0.190 | 0.877 | 4.35E-01 | 4.35E+01 |  |  |
| 8095009 | NM_00104040  | DCUN1D4   | DCN1, defective in cullin neddylat   | 0.029  | 1.020 | 8.60E-01 | 8.60E+01 |  |  |
| 8095048 | NM_030917    | FIP1L1    | FIP1 like 1 (S. cerevisiae)          | -0.022 | 0.985 | 8.84E-01 | 8.84E+01 |  |  |
| 8095072 | ENST00000312 | LOC441016 | similar to COMM domain containi      | 0.009  | 1.006 | 9.63E-01 | 9.63E+01 |  |  |
| 8095074 | NM_133267    | GSX2      | GS homeobox 2                        | -0.027 | 0.981 | 8.14E-01 | 8.14E+01 |  |  |
| 8095135 | ---          | ---       | ---                                  | 0.141  | 1.103 | 8.23E-02 | 8.23E+00 |  |  |
| 8095139 | NM_024592    | SRD5A3    | steroid 5 alpha-reductase 3          | 0.160  | 1.117 | 3.07E-01 | 3.07E+01 |  |  |
| 8095148 | NM_018475    | TMEM165   | transmembrane protein 165            | 0.029  | 1.020 | 8.74E-01 | 8.74E+01 |  |  |
| 8095159 | ---          | ---       | ---                                  | -0.021 | 0.985 | 9.53E-01 | 9.53E+01 |  |  |
| 8095163 | NM_00102492  | EXOC1     | exocyst complex component 1          | 0.085  | 1.061 | 5.55E-01 | 5.55E+01 |  |  |
| 8095185 | ---          | ---       | ---                                  | 0.131  | 1.095 | 6.18E-01 | 6.18E+01 |  |  |
| 8095187 | NM_025009    | CEP135    | centrosomal protein 135kDa           | -0.100 | 0.933 | 3.67E-01 | 3.67E+01 |  |  |
| 8095214 | ---          | ---       | ---                                  | -0.013 | 0.991 | 9.76E-01 | 9.76E+01 |  |  |
| 8095216 | NM_020722    | KIAA1211  | KIAA1211                             | -0.024 | 0.983 | 8.91E-01 | 8.91E+01 |  |  |
| 8095221 | NM_00107952  | PAICS     | phosphoribosylaminoimidazole ca      | -0.038 | 0.974 | 8.97E-01 | 8.97E+01 |  |  |
| 8095230 | NM_006947    | SRP72     | signal recognition particle 72kDa    | 0.053  | 1.037 | 6.83E-01 | 6.83E+01 |  |  |
| 8095260 | ---          | ---       | ---                                  | -0.069 | 0.954 | 6.38E-01 | 6.38E+01 |  |  |
| 8095262 | NM_005612    | REST      | RE1-silencing transcription factor   | -0.044 | 0.970 | 6.41E-01 | 6.41E+01 |  |  |
| 8095269 | NM_000938    | POLR2B    | polymerase (RNA) II (DNA directe     | 0.010  | 1.007 | 9.57E-01 | 9.57E+01 |  |  |
| 8095295 | ---          | ---       | ---                                  | 0.065  | 1.046 | 8.84E-01 | 8.84E+01 |  |  |
| 8095299 | ---          | ---       | ---                                  | 0.157  | 1.115 | 6.81E-01 | 6.81E+01 |  |  |
| 8095333 | NM_006544    | EXOC5     | exocyst complex component 5          | 0.015  | 1.011 | 9.69E-01 | 9.69E+01 |  |  |
| 8095341 | ---          | ---       | ---                                  | 0.239  | 1.180 | 2.46E-02 | 2.46E+00 |  |  |

|         |              |           |                                     |        |       |          |          |  |  |
|---------|--------------|-----------|-------------------------------------|--------|-------|----------|----------|--|--|
| 8095360 | ---          | ---       | ---                                 | 0.068  | 1.049 | 7.29E-01 | 7.29E+01 |  |  |
| 8095362 | NM_005953    | MT2A      | metallothionein 2A                  | -0.342 | 0.789 | 1.57E-01 | 1.57E+01 |  |  |
| 8095376 | NM_005953    | MT2A      | metallothionein 2A                  | -0.322 | 0.800 | 2.02E-01 | 2.02E+01 |  |  |
| 8095451 | NM_214711    | C4orf40   | chromosome 4 open reading frame     | -0.013 | 0.991 | 9.01E-01 | 9.01E+01 |  |  |
| 8095539 | NM_020368    | UTP3      | UTP3, small subunit (SSU) process   | -0.005 | 0.997 | 9.84E-01 | 9.84E+01 |  |  |
| 8095545 | NM_00103744  | RUFY3     | RUN and FYVE domain containing      | -0.019 | 0.987 | 9.50E-01 | 9.50E+01 |  |  |
| 8095562 | ---          | ---       | ---                                 | 0.077  | 1.055 | 8.89E-01 | 8.89E+01 |  |  |
| 8095566 | NM_173468    | MOBK1A    | MOB1, Mps One Binder kinase act     | 0.082  | 1.059 | 6.57E-01 | 6.57E+01 |  |  |
| 8095574 | NM_000788    | DKK       | deoxycytidine kinase                | 0.162  | 1.119 | 8.09E-03 | 8.09E-01 |  |  |
| 8095585 | NM_00109848  | SLC4A4    | solute carrier family 4, sodium bic | 0.160  | 1.117 | 2.22E-01 | 2.22E+01 |  |  |
| 8095626 | ---          | ---       | ---                                 | 0.048  | 1.034 | 8.78E-01 | 8.78E+01 |  |  |
| 8095694 | NM_002620    | PF4V1     | platelet factor 4 variant 1         | 0.126  | 1.091 | 2.02E-01 | 2.02E+01 |  |  |
| 8095703 | ---          | ---       | ---                                 | -0.072 | 0.951 | 8.07E-01 | 8.07E+01 |  |  |
| 8095736 | NM_001657    | AREG      | amphiregulin                        | -0.036 | 0.976 | 9.16E-01 | 9.16E+01 |  |  |
| 8095758 | NM_015436    | RCHY1     | ring finger and CHY zinc finger do  | 0.039  | 1.027 | 8.70E-01 | 8.70E+01 |  |  |
| 8095773 | NM_003715    | USO1      | USO1 homolog, vesicle docking pr    | 0.097  | 1.070 | 5.34E-01 | 5.34E+01 |  |  |
| 8095800 | ---          | ---       | ---                                 | -0.049 | 0.967 | 6.83E-01 | 6.83E+01 |  |  |
| 8095802 | NM_018115    | SDAD1     | SDA1 domain containing 1            | -0.042 | 0.971 | 8.67E-01 | 8.67E+01 |  |  |
| 8095826 | NM_003943    | STBD1     | starch binding domain 1             | 0.081  | 1.057 | 6.30E-01 | 6.30E+01 |  |  |
| 8095854 | NM_018243    | 40432     | septin 11                           | -0.006 | 0.996 | 9.84E-01 | 9.84E+01 |  |  |
| 8095870 | NM_004354    | CCNG2     | cyclin G2                           | -0.029 | 0.980 | 8.44E-01 | 8.44E+01 |  |  |
| 8095894 | NM_020236    | MRPL1     | mitochondrial ribosomal protein L   | 0.102  | 1.074 | 5.91E-01 | 5.91E+01 |  |  |
| 8096002 | ---          | ---       | ---                                 | -0.005 | 0.997 | 9.85E-01 | 9.85E+01 |  |  |
| 8096004 | NM_198892    | BMP2K     | BMP2 inducible kinase               | 0.188  | 1.139 | 1.72E-01 | 1.72E+01 |  |  |
| 8096025 | ---          | ---       | ---                                 | 0.073  | 1.052 | 7.98E-01 | 7.98E+01 |  |  |
| 8096032 | NM_020226    | PRDM8     | PR domain containing 8              | -0.040 | 0.973 | 7.68E-01 | 7.68E+01 |  |  |
| 8096070 | NM_001201    | BMP3      | bone morphogenetic protein 3        | 0.044  | 1.031 | 7.49E-01 | 7.49E+01 |  |  |
| 8096077 | ---          | ---       | ---                                 | 0.100  | 1.072 | 6.06E-01 | 6.06E+01 |  |  |
| 8096079 | ---          | ---       | ---                                 | 0.155  | 1.113 | 2.36E-01 | 2.36E+01 |  |  |
| 8096081 | NM_021204    | ENOPH1    | enolase-phosphatase 1               | -0.014 | 0.991 | 9.65E-01 | 9.65E+01 |  |  |
| 8096098 | NM_016129    | COP54     | COP9 constitutive photomorphoge     | -0.068 | 0.954 | 6.35E-01 | 6.35E+01 |  |  |
| 8096109 | NM_016067    | MRPS18C   | mitochondrial ribosomal protein S   | 0.062  | 1.044 | 6.95E-01 | 6.95E+01 |  |  |
| 8096116 | NM_032717    | AGPAT9    | 1-acylglycerol-3-phosphate O-acyl   | -0.059 | 0.960 | 9.22E-01 | 9.22E+01 |  |  |
| 8096160 | NM_00102561  | ARHGAP24  | Rho GTPase activating protein 24    | 0.102  | 1.074 | 7.42E-01 | 7.42E+01 |  |  |
| 8096176 | NM_080683    | PTPN13    | protein tyrosine phosphatase, non   | 0.111  | 1.080 | 7.85E-01 | 7.85E+01 |  |  |
| 8096224 | NM_005935    | AFF1      | AF4/FMR2 family, member 1           | 0.034  | 1.024 | 8.31E-01 | 8.31E+01 |  |  |
| 8096251 | NM_024047    | NUDT9     | nudix (nucleoside diphosphate lin   | 0.070  | 1.050 | 5.55E-01 | 5.55E+01 |  |  |
| 8096296 | AY956764     | HSP90AB3P | heat shock protein 90kDa alpha (c   | -0.126 | 0.916 | 4.86E-01 | 4.86E+01 |  |  |
| 8096314 | NM_000297    | PKD2      | polycystic kidney disease 2 (autos  | -0.023 | 0.984 | 9.19E-01 | 9.19E+01 |  |  |
| 8096331 | ---          | ---       | ---                                 | 0.103  | 1.074 | 5.11E-01 | 5.11E+01 |  |  |
| 8096335 | NM_017912    | HERC6     | hect domain and RLD 6               | 0.058  | 1.041 | 9.32E-01 | 9.32E+01 |  |  |
| 8096361 | NM_016323    | HERC5     | hect domain and RLD 5               | 0.215  | 1.161 | 6.51E-01 | 6.51E+01 |  |  |
| 8096385 | NM_014606    | HERC3     | hect domain and RLD 3               | 0.153  | 1.112 | 1.19E-01 | 1.19E+01 |  |  |
| 8096461 | NM_005172    | ATOH1     | atonal homolog 1 (Drosophila)       | -0.018 | 0.988 | 9.36E-01 | 9.36E+01 |  |  |
| 8096463 | NM_00112842  | SMARCAD1  | SWI/SNF-related, matrix-associate   | -0.039 | 0.973 | 8.23E-01 | 8.23E+01 |  |  |
| 8096489 | NM_006457    | PDLIM5    | PDZ and LIM domain 5                | 0.304  | 1.234 | 3.04E-02 | 3.04E+00 |  |  |
| 8096528 | NM_005390    | PDHA2     | pyruvate dehydrogenase (lipoam      | -0.023 | 0.984 | 9.30E-01 | 9.30E+01 |  |  |
| 8096533 | ---          | ---       | ---                                 | 0.011  | 1.008 | 9.62E-01 | 9.62E+01 |  |  |
| 8096538 | NM_00110042  | RAP1GDS1  | RAP1, GTP-GDP dissociation stimu    | 0.139  | 1.101 | 1.85E-01 | 1.85E+01 |  |  |
| 8096556 | NM_015143    | METAP1    | methionyl aminopeptidase 1          | 0.115  | 1.083 | 3.54E-01 | 3.54E+01 |  |  |
| 8096602 | NM_014395    | DAPP1     | dual adaptor of phosphotyrosine a   | 0.166  | 1.122 | 4.62E-01 | 4.62E+01 |  |  |
| 8096661 | ---          | ---       | ---                                 | 0.101  | 1.072 | 6.99E-01 | 6.99E+01 |  |  |
| 8096663 | NM_00100838  | CISD2     | CDGSH iron sulfur domain 2          | 0.303  | 1.234 | 1.51E-01 | 1.51E+01 |  |  |
| 8096669 | NM_017628    | TET2      | tet oncogene family member 2        | 0.177  | 1.131 | 3.56E-01 | 3.56E+01 |  |  |
| 8096675 | NM_00112720  | TET2      | tet oncogene family member 2        | 0.190  | 1.141 | 2.37E-01 | 2.37E+01 |  |  |
| 8096718 | NM_004757    | AIMP1     | aminoacyl tRNA synthetase compl     | 0.036  | 1.025 | 7.53E-01 | 7.53E+01 |  |  |
| 8096744 | NM_183075    | CYP2U1    | cytochrome P450, family 2, subfa    | 0.013  | 1.009 | 9.67E-01 | 9.67E+01 |  |  |
| 8096753 | NM_005327    | HADH      | hydroxyacyl-Coenzyme A dehydro      | 0.049  | 1.034 | 7.73E-01 | 7.73E+01 |  |  |
| 8096765 | NM_033625    | RPL34     | ribosomal protein L34               | -0.018 | 0.987 | 9.40E-01 | 9.40E+01 |  |  |
| 8096771 | NM_021227    | OSTC      | oligosaccharyltransferase complex   | 0.071  | 1.050 | 7.02E-01 | 7.02E+01 |  |  |
| 8096777 | ---          | ---       | ---                                 | -0.031 | 0.979 | 9.22E-01 | 9.22E+01 |  |  |
| 8096781 | NM_006323    | SEC24B    | SEC24 family, member B (S. cerevi   | 0.042  | 1.029 | 7.14E-01 | 7.14E+01 |  |  |
| 8096808 | NM_017918    | CCDC109B  | coiled-coil domain containing 109   | 0.096  | 1.069 | 5.21E-01 | 5.21E+01 |  |  |
| 8096821 | NM_018983    | GAR1      | GAR1 ribonucleoprotein homolog      | -0.003 | 0.998 | 9.80E-01 | 9.80E+01 |  |  |
| 8096899 | NM_152400    | C4orf32   | chromosome 4 open reading frame     | 0.071  | 1.051 | 4.25E-01 | 4.25E+01 |  |  |
| 8096905 | NM_018569    | C4orf16   | chromosome 4 open reading frame     | 0.203  | 1.151 | 3.80E-02 | 3.80E+00 |  |  |
| 8096919 | NM_025144    | ALPK1     | alpha-kinase 1                      | 0.230  | 1.173 | 1.61E-01 | 1.61E+01 |  |  |
| 8096938 | NM_016648    | LARP7     | La ribonucleoprotein domain fami    | 0.035  | 1.024 | 8.33E-01 | 8.33E+01 |  |  |
| 8096955 | ---          | ---       | ---                                 | 0.035  | 1.024 | 8.36E-01 | 8.36E+01 |  |  |
| 8097017 | NM_00112817  | UGT8      | UDP glycosyltransferase 8           | 0.109  | 1.079 | 4.94E-01 | 4.94E+01 |  |  |
| 8097030 | ---          | ---       | ---                                 | -0.047 | 0.968 | 8.66E-01 | 8.66E+01 |  |  |
| 8097056 | NR_002963    | SNORA24   | small nucleolar RNA, H/ACA box 2    | -0.284 | 0.821 | 3.72E-01 | 3.72E+01 |  |  |
| 8097064 | BC032332     | PCMTD2    | protein-L-isoaspartate (D-aspartat  | -0.033 | 0.977 | 8.93E-01 | 8.93E+01 |  |  |
| 8097066 | NM_020961    | METTL14   | methyltransferase like 14           | 0.063  | 1.045 | 5.81E-01 | 5.81E+01 |  |  |
| 8097096 | ---          | ---       | ---                                 | 0.078  | 1.056 | 5.30E-01 | 5.30E+01 |  |  |
| 8097116 | ---          | ---       | ---                                 | 0.045  | 1.031 | 9.24E-01 | 9.24E+01 |  |  |
| 8097118 | ENST00000415 | tcag7.907 | hypothetical LOC402483              | 0.009  | 1.006 | 9.73E-01 | 9.73E+01 |  |  |

|         |             |               |                                     |        |       |          |          |  |  |
|---------|-------------|---------------|-------------------------------------|--------|-------|----------|----------|--|--|
| 8097128 | NM_00103419 | EXOSC9        | exosome component 9                 | 0.043  | 1.030 | 7.72E-01 | 7.72E+01 |  |  |
| 8097146 | ---         | ---           | ---                                 | -0.056 | 0.962 | 7.97E-01 | 7.97E+01 |  |  |
| 8097148 | NM_015312   | KIAA1109      | KIAA1109                            | -0.020 | 0.986 | 9.11E-01 | 9.11E+01 |  |  |
| 8097262 | NM_145207   | SPATA5        | spermatogenesis associated 5        | -0.009 | 0.994 | 9.75E-01 | 9.75E+01 |  |  |
| 8097282 | NM_005841   | SPRY1         | sprouty homolog 1, antagonist of    | -0.021 | 0.985 | 9.16E-01 | 9.16E+01 |  |  |
| 8097373 | BC034253    | C4orf29       | chromosome 4 open reading fram      | 0.019  | 1.013 | 9.08E-01 | 9.08E+01 |  |  |
| 8097415 | ---         | ---           | ---                                 | -0.026 | 0.982 | 8.73E-01 | 8.73E+01 |  |  |
| 8097417 | NM_199320   | PHF17         | PHD finger protein 17               | -0.073 | 0.951 | 5.55E-01 | 5.55E+01 |  |  |
| 8097443 | ---         | ---           | ---                                 | 0.098  | 1.071 | 3.04E-01 | 3.04E+01 |  |  |
| 8097447 | ---         | ---           | ---                                 | 0.058  | 1.041 | 7.23E-01 | 7.23E+01 |  |  |
| 8097449 | NM_032961   | PCDH10        | protocadherin 10                    | -0.001 | 0.999 | 9.96E-01 | 9.96E+01 |  |  |
| 8097461 | NM_012118   | CCR4L         | CCR4 carbon catabolite repression   | -0.032 | 0.978 | 8.10E-01 | 8.10E+01 |  |  |
| 8097468 | ---         | ---           | ---                                 | 0.055  | 1.039 | 7.61E-01 | 7.61E+01 |  |  |
| 8097470 | ---         | ---           | ---                                 | -0.055 | 0.963 | 8.16E-01 | 8.16E+01 |  |  |
| 8097472 | ---         | ---           | ---                                 | 0.073  | 1.052 | 7.43E-01 | 7.43E+01 |  |  |
| 8097476 | ---         | ---           | ---                                 | 0.080  | 1.057 | 5.41E-01 | 5.41E+01 |  |  |
| 8097480 | NM_057175   | NARG1         | NMDA receptor regulated 1           | 0.062  | 1.044 | 7.10E-01 | 7.10E+01 |  |  |
| 8097507 | NM_031296   | RAB33B        | RAB33B, member RAS oncogene f       | -0.018 | 0.987 | 9.27E-01 | 9.27E+01 |  |  |
| 8097513 | NM_002413   | MGST2         | microsomal glutathione S-transfer   | 0.344  | 1.269 | 1.09E-01 | 1.09E+01 |  |  |
| 8097521 | NM_032547   | SCOC          | short coiled-coil protein           | 0.014  | 1.010 | 9.52E-01 | 9.52E+01 |  |  |
| 8097543 | NM_014487   | ZNF330        | zinc finger protein 330             | 0.163  | 1.119 | 1.16E-01 | 1.16E+01 |  |  |
| 8097553 | NM_172174   | IL15          | interleukin 15                      | -0.094 | 0.937 | 7.68E-01 | 7.68E+01 |  |  |
| 8097570 | NM_032557   | USP38         | ubiquitin specific peptidase 38     | -0.096 | 0.935 | 4.67E-01 | 4.67E+01 |  |  |
| 8097600 | NM_003601   | SMARCA5       | SWI/SNF related, matrix associate   | -0.026 | 0.982 | 7.91E-01 | 7.91E+01 |  |  |
| 8097626 | NR_003675   | LOC441046     | glucuronidase, beta pseudogene      | -0.032 | 0.978 | 8.62E-01 | 8.62E+01 |  |  |
| 8097647 | NM_002940   | ABCE1         | ATP-binding cassette, sub-family E  | 0.132  | 1.096 | 4.12E-01 | 4.12E+01 |  |  |
| 8097655 | ---         | ---           | ---                                 | -0.132 | 0.913 | 3.94E-01 | 3.94E+01 |  |  |
| 8097657 | NM_005900   | SMAD1         | SMAD family member 1                | 0.030  | 1.021 | 9.56E-01 | 9.56E+01 |  |  |
| 8097670 | NM_172250   | MMAA          | methylmalonic aciduria (cobalami    | 0.072  | 1.051 | 7.54E-01 | 7.54E+01 |  |  |
| 8097679 | NM_007080   | LSM6          | LSM6 homolog, U6 small nuclear R    | 0.121  | 1.088 | 1.90E-01 | 1.90E+01 |  |  |
| 8097687 | NM_004575   | POU4F2        | POU class 4 homeobox 2              | -0.010 | 0.993 | 9.56E-01 | 9.56E+01 |  |  |
| 8097717 | NM_024605   | ARHGAP10      | Rho GTPase activating protein 10    | 0.459  | 1.375 | 6.39E-02 | 6.39E+00 |  |  |
| 8097743 | ---         | ---           | ---                                 | 0.252  | 1.191 | 2.18E-01 | 2.18E+01 |  |  |
| 8097773 | NM_006439   | MAB21L2       | mab-21-like 2 (C. elegans)          | 0.051  | 1.036 | 8.21E-01 | 8.21E+01 |  |  |
| 8097782 | NM_001006   | RPS3A         | ribosomal protein S3A               | 0.010  | 1.007 | 9.40E-01 | 9.40E+01 |  |  |
| 8097792 | NR_000007   | SNORD73A      | small nucleolar RNA, C/D box 73A    | -0.104 | 0.930 | 7.71E-01 | 7.71E+01 |  |  |
| 8097811 | AL137273    | DKFZP434I0714 | hypothetical protein DKFZP434I07    | 0.025  | 1.017 | 8.97E-01 | 8.97E+01 |  |  |
| 8097813 | NM_00102559 | ARFIP1        | ADP-ribosylation factor interacting | 0.153  | 1.112 | 3.52E-01 | 3.52E+01 |  |  |
| 8097827 | ---         | ---           | ---                                 | 0.049  | 1.035 | 7.53E-01 | 7.53E+01 |  |  |
| 8097867 | NM_015196   | KIAA0922      | KIAA0922                            | -0.016 | 0.989 | 9.38E-01 | 9.38E+01 |  |  |
| 8097903 | NM_003264   | TLR2          | toll-like receptor 2                | -0.458 | 0.728 | 1.54E-01 | 1.54E+01 |  |  |
| 8097936 | ---         | ---           | ---                                 | -0.074 | 0.950 | 5.17E-01 | 5.17E+01 |  |  |
| 8097938 | NM_000910   | NPY2R         | neuropeptide Y receptor Y2          | -0.066 | 0.955 | 4.27E-01 | 4.27E+01 |  |  |
| 8097955 | ---         | ---           | ---                                 | -0.061 | 0.959 | 8.77E-01 | 8.77E+01 |  |  |
| 8097973 | NM_000857   | GUCY1B3       | guanylate cyclase 1, soluble, beta  | 0.203  | 1.151 | 2.91E-01 | 2.91E+01 |  |  |
| 8098103 | NM_020840   | FNIP2         | folliculin interacting protein 2    | 0.177  | 1.130 | 6.80E-01 | 6.80E+01 |  |  |
| 8098121 | NM_014247   | RAPGEF2       | Rap guanine nucleotide exchange     | 0.197  | 1.146 | 2.09E-01 | 2.09E+01 |  |  |
| 8098150 | NM_018352   | C4orf43       | chromosome 4 open reading fram      | 0.138  | 1.101 | 4.44E-01 | 4.44E+01 |  |  |
| 8098163 | ---         | ---           | ---                                 | 0.140  | 1.102 | 5.34E-01 | 5.34E+01 |  |  |
| 8098165 | ---         | ---           | ---                                 | -0.001 | 0.999 | 9.96E-01 | 9.96E+01 |  |  |
| 8098167 | BC022381    | C4orf39       | chromosome 4 open reading fram      | 0.064  | 1.045 | 6.58E-01 | 6.58E+01 |  |  |
| 8098177 | NM_007246   | KLHL2         | kelch-like 2, Mayven (Drosophila)   | -0.143 | 0.905 | 3.38E-01 | 3.38E+01 |  |  |
| 8098193 | ---         | ---           | ---                                 | 0.019  | 1.013 | 9.67E-01 | 9.67E+01 |  |  |
| 8098240 | ---         | ---           | ---                                 | 0.013  | 1.009 | 9.57E-01 | 9.57E+01 |  |  |
| 8098244 | ---         | ---           | ---                                 | -0.061 | 0.959 | 6.46E-01 | 6.46E+01 |  |  |
| 8098289 | ---         | ---           | ---                                 | -0.133 | 0.912 | 7.51E-01 | 7.51E+01 |  |  |
| 8098291 | NM_173872   | CLCN3         | chloride channel 3                  | -0.035 | 0.976 | 8.53E-01 | 8.53E+01 |  |  |
| 8098326 | ---         | ---           | ---                                 | -0.042 | 0.972 | 8.85E-01 | 8.85E+01 |  |  |
| 8098328 | NM_017423   | GALNT7        | UDP-N-acetyl-alpha-D-galactosam     | 0.110  | 1.079 | 4.14E-01 | 4.14E+01 |  |  |
| 8098342 | NM_003864   | SAP30         | Sin3A-associated protein, 30kDa     | 0.080  | 1.057 | 5.55E-01 | 5.55E+01 |  |  |
| 8098414 | NM_021928   | SPCS3         | signal peptidase complex subunit    | 0.179  | 1.132 | 9.64E-02 | 9.64E+00 |  |  |
| 8098421 | ---         | ---           | ---                                 | 0.086  | 1.062 | 3.49E-01 | 3.49E+01 |  |  |
| 8098470 | NM_024949   | WWC2          | WW and C2 domain containing 2       | 0.064  | 1.046 | 8.64E-01 | 8.64E+01 |  |  |
| 8098500 | NM_017632   | CDKN2AIP      | CDKN2A interacting protein          | 0.008  | 1.006 | 9.73E-01 | 9.73E+01 |  |  |
| 8098508 | NM_001564   | ING2          | inhibitor of growth family, membe   | 0.091  | 1.065 | 6.41E-01 | 6.41E+01 |  |  |
| 8098512 | NM_021942   | C4orf41       | chromosome 4 open reading fram      | 0.122  | 1.088 | 3.17E-01 | 3.17E+01 |  |  |
| 8098547 | ---         | ---           | ---                                 | -0.070 | 0.953 | 8.71E-01 | 8.71E+01 |  |  |
| 8098549 | NM_020225   | STOX2         | storkhead box 2                     | -0.082 | 0.945 | 3.93E-01 | 3.93E+01 |  |  |
| 8098571 | BC140795    | HELT          | HES/HEY-like transcription factor   | -0.001 | 1.000 | 9.97E-01 | 9.97E+01 |  |  |
| 8098576 | NM_001151   | SLC25A4       | solute carrier family 25 (mitochon  | -0.145 | 0.904 | 3.04E-01 | 3.04E+01 |  |  |
| 8098581 | NM_031953   | SNX25         | sorting nexin 25                    | -0.221 | 0.858 | 5.45E-02 | 5.45E+00 |  |  |
| 8098604 | NM_181726   | ANKRD37       | ankyrin repeat domain 37            | -0.034 | 0.976 | 8.52E-01 | 8.52E+01 |  |  |
| 8098637 | NM_207352   | CYP4V2        | cytochrome P450, family 4, subfar   | 0.088  | 1.063 | 6.73E-01 | 6.73E+01 |  |  |
| 8098705 | NM_019041   | MTRF1L        | mitochondrial translational releas  | 0.033  | 1.023 | 8.26E-01 | 8.26E+01 |  |  |
| 8098707 | AY956760    | HSP90AA4P     | heat shock protein 90kDa alpha (c   | -0.019 | 0.987 | 9.37E-01 | 9.37E+01 |  |  |
| 8098714 | NM_004477   | FRG1          | FSHD region gene 1                  | 0.219  | 1.164 | 9.17E-02 | 9.17E+00 |  |  |
| 8098723 | ---         | ---           | ---                                 | -0.085 | 0.943 | 4.43E-01 | 4.43E+01 |  |  |

|         |              |              |                                       |        |       |          |          |  |  |
|---------|--------------|--------------|---------------------------------------|--------|-------|----------|----------|--|--|
| 8098725 | NM_033178    | DUX4         | double homeobox, 4                    | -0.010 | 0.993 | 9.50E-01 | 9.50E+01 |  |  |
| 8098730 | NM_033178    | DUX4         | double homeobox, 4                    | 0.000  | 1.000 | 9.99E-01 | 9.99E+01 |  |  |
| 8098732 | NM_033178    | DUX4         | double homeobox, 4                    | -0.016 | 0.989 | 8.91E-01 | 8.91E+01 |  |  |
| 8098740 | NM_033178    | DUX4         | double homeobox, 4                    | -0.009 | 0.994 | 9.50E-01 | 9.50E+01 |  |  |
| 8098743 | NM_033178    | DUX4         | double homeobox, 4                    | 0.000  | 1.000 | 9.99E-01 | 9.99E+01 |  |  |
| 8098758 | NM_133474    | ZNF721       | zinc finger protein 721               | 0.117  | 1.085 | 4.25E-01 | 4.25E+01 |  |  |
| 8098762 | NM_007100    | ATP5I        | ATP synthase, H+ transporting, mi     | 0.027  | 1.019 | 8.64E-01 | 8.64E+01 |  |  |
| 8098769 | NM_032219    | MFSD7        | major facilitator superfamily doma    | -0.037 | 0.975 | 7.72E-01 | 7.72E+01 |  |  |
| 8098782 | NM_006651    | CPLX1        | complexin 1                           | -0.020 | 0.986 | 9.07E-01 | 9.07E+01 |  |  |
| 8098789 | NM_005255    | GAK          | cyclin G associated kinase            | 0.059  | 1.041 | 4.16E-01 | 4.16E+01 |  |  |
| 8098822 | NM_001347    | DGKQ         | diacylglycerol kinase, theta 110kD    | -0.066 | 0.955 | 3.66E-01 | 3.66E+01 |  |  |
| 8098848 | NM_213613    | SLC26A1      | solute carrier family 26 (sulfate tra | -0.004 | 0.997 | 9.84E-01 | 9.84E+01 |  |  |
| 8098870 | NM_012445    | SPON2        | spondin 2, extracellular matrix pro   | -0.061 | 0.959 | 5.89E-01 | 5.89E+01 |  |  |
| 8098877 | NR_024569    | LOC100130872 | hypothetical LOC100130872             | -0.019 | 0.987 | 8.89E-01 | 8.89E+01 |  |  |
| 8098880 | NM_00101261  | CTBP1        | C-terminal binding protein 1          | 0.051  | 1.036 | 5.03E-01 | 5.03E+01 |  |  |
| 8098895 | NM_00101362  | FAM53A       | family with sequence similarity 53    | -0.050 | 0.966 | 6.36E-01 | 6.36E+01 |  |  |
| 8098902 | ---          | ---          | ---                                   | -0.071 | 0.952 | 8.10E-01 | 8.10E+01 |  |  |
| 8098904 | NM_006527    | SLBP         | stem-loop binding protein             | 0.028  | 1.020 | 8.57E-01 | 8.57E+01 |  |  |
| 8098916 | NM_00112726  | TMEM129      | transmembrane protein 129             | 0.009  | 1.006 | 9.54E-01 | 9.54E+01 |  |  |
| 8098924 | NM_012318    | LETM1        | leucine zipper-EF-hand containing     | -0.070 | 0.953 | 6.06E-01 | 6.06E+01 |  |  |
| 8098942 | NM_005663    | WHSC2        | Wolf-Hirschhorn syndrome candid       | -0.085 | 0.943 | 3.14E-01 | 3.14E+01 |  |  |
| 8098958 | NM_181808    | POLN         | polymerase (DNA directed) nu          | -0.054 | 0.964 | 7.63E-01 | 7.63E+01 |  |  |
| 8098985 | NM_024511    | HAUS3        | HAUS augmin-like complex, subun       | -0.106 | 0.929 | 3.36E-01 | 3.36E+01 |  |  |
| 8098995 | NM_006454    | MXD4         | MAX dimerization protein 4            | 0.024  | 1.017 | 8.62E-01 | 8.62E+01 |  |  |
| 8099008 | NM_020972    | ZFYVE28      | zinc finger, FYVE domain containi     | 0.025  | 1.018 | 8.55E-01 | 8.55E+01 |  |  |
| 8099027 | ---          | ---          | ---                                   | 0.050  | 1.035 | 8.79E-01 | 8.79E+01 |  |  |
| 8099029 | NM_024309    | TNIP2        | TNFAIP3 interacting protein 2         | -0.082 | 0.944 | 4.77E-01 | 4.77E+01 |  |  |
| 8099037 | NM_00114606  | MFSD10       | major facilitator superfamily doma    | -0.047 | 0.968 | 6.05E-01 | 6.05E+01 |  |  |
| 8099051 | NM_003703    | NOP14        | NOP14 nucleolar protein homolog       | -0.007 | 0.995 | 9.77E-01 | 9.77E+01 |  |  |
| 8099073 | NM_002337    | LRPAP1       | low density lipoprotein receptor-r    | 0.080  | 1.057 | 5.82E-01 | 5.82E+01 |  |  |
| 8099082 | ---          | ---          | ---                                   | -0.061 | 0.958 | 7.34E-01 | 7.34E+01 |  |  |
| 8099084 | NR_024253    | LOC348926    | family with sequence similarity 86    | -0.072 | 0.952 | 3.68E-01 | 3.68E+01 |  |  |
| 8099091 | ---          | ---          | ---                                   | -0.110 | 0.926 | 1.76E-01 | 1.76E+01 |  |  |
| 8099107 | NM_017816    | LYAR         | Ly1 antibody reactive homolog (m      | 0.115  | 1.083 | 5.55E-01 | 5.55E+01 |  |  |
| 8099121 | NM_016930    | STX18        | syntaxin 18                           | 0.033  | 1.023 | 8.74E-01 | 8.74E+01 |  |  |
| 8099130 | ---          | ---          | ---                                   | 0.028  | 1.020 | 8.97E-01 | 8.97E+01 |  |  |
| 8099132 | NM_018659    | CYTL1        | cytokine-like 1                       | -0.035 | 0.976 | 7.94E-01 | 7.94E+01 |  |  |
| 8099172 | NM_001313    | CRMP1        | collapsin response mediator prote     | -0.053 | 0.964 | 6.38E-01 | 6.38E+01 |  |  |
| 8099200 | NM_144720    | JAKMIP1      | janus kinase and microtubule inte     | -0.033 | 0.977 | 9.00E-01 | 9.00E+01 |  |  |
| 8099233 | ENST00000446 | LOC100133131 | hypothetical protein LOC100133131     | -0.059 | 0.960 | 5.56E-01 | 5.56E+01 |  |  |
| 8099235 | NM_203462    | MRFAP11      | Morf4 family associated protein 1     | 0.006  | 1.004 | 9.80E-01 | 9.80E+01 |  |  |
| 8099240 | ---          | ---          | ---                                   | -0.018 | 0.988 | 9.64E-01 | 9.64E+01 |  |  |
| 8099246 | NM_025196    | GRPEL1       | GrpE-like 1, mitochondrial (E. coli)  | -0.003 | 0.998 | 9.90E-01 | 9.90E+01 |  |  |
| 8099253 | ---          | ---          | ---                                   | -0.022 | 0.985 | 8.63E-01 | 8.63E+01 |  |  |
| 8099279 | NM_00113008  | ABLIM2       | actin binding LIM protein family, n   | 0.001  | 1.000 | 9.97E-01 | 9.97E+01 |  |  |
| 8099304 | NM_003501    | ACOX3        | acyl-Coenzyme A oxidase 3, prista     | -0.002 | 0.998 | 9.90E-01 | 9.90E+01 |  |  |
| 8099340 | NM_017491    | WDR1         | WD repeat domain 1                    | 0.001  | 1.001 | 9.97E-01 | 9.97E+01 |  |  |
| 8099362 | ---          | ---          | ---                                   | 0.023  | 1.016 | 9.53E-01 | 9.53E+01 |  |  |
| 8099364 | NM_053042    | ZNF518B      | zinc finger protein 518B              | 0.009  | 1.006 | 9.74E-01 | 9.74E+01 |  |  |
| 8099388 | NM_005114    | HS3ST1       | heparan sulfate (glucosamine) 3-C     | 0.025  | 1.018 | 8.55E-01 | 8.55E+01 |  |  |
| 8099395 | NM_004249    | RAB28        | RAB28, member RAS oncogene fa         | -0.028 | 0.981 | 8.86E-01 | 8.86E+01 |  |  |
| 8099406 | NM_001189    | NKX3-2       | NK3 homeobox 2                        | -0.050 | 0.966 | 5.91E-01 | 5.91E+01 |  |  |
| 8099410 | NM_148894    | BOD1L        | biorientation of chromosomes in c     | -0.062 | 0.958 | 5.23E-01 | 5.23E+01 |  |  |
| 8099449 | NM_033535    | FBXL5        | F-box and leucine-rich repeat prot    | 0.072  | 1.051 | 7.07E-01 | 7.07E+01 |  |  |
| 8099467 | NM_005130    | FGFBP1       | fibroblast growth factor binding pr   | -0.057 | 0.961 | 5.80E-01 | 5.80E+01 |  |  |
| 8099471 | NM_031950    | FGFBP2       | fibroblast growth factor binding pr   | -0.050 | 0.966 | 9.00E-01 | 9.00E+01 |  |  |
| 8099506 | NM_153365    | TAPT1        | transmembrane anterior posterior      | -0.010 | 0.993 | 9.74E-01 | 9.74E+01 |  |  |
| 8099524 | NM_00113083  | LDB2         | LIM domain binding 2                  | -0.021 | 0.985 | 9.22E-01 | 9.22E+01 |  |  |
| 8099537 | ---          | ---          | ---                                   | -0.015 | 0.990 | 9.50E-01 | 9.50E+01 |  |  |
| 8099541 | NM_000320    | QDPR         | quinoid dihydropteridine reductas     | 0.111  | 1.080 | 5.42E-01 | 5.42E+01 |  |  |
| 8099551 | NM_015688    | FAM184B      | family with sequence similarity 18    | -0.033 | 0.978 | 8.32E-01 | 8.32E+01 |  |  |
| 8099570 | BC050697     | DCAF16       | DBI and CUL4 associated factor        | 0.000  | 1.000 | 1.00E+00 | 1.00E+02 |  |  |
| 8099581 | NM_153686    | LCORL        | ligand dependent nuclear recepto      | 0.127  | 1.092 | 4.88E-01 | 4.88E+01 |  |  |
| 8099631 | ---          | ---          | ---                                   | 0.088  | 1.063 | 3.95E-01 | 3.95E+01 |  |  |
| 8099649 | NM_001358    | DHX15        | DEAH (Asp-Glu-Ala-His) box polyp      | 0.005  | 1.003 | 9.72E-01 | 9.72E+01 |  |  |
| 8099668 | ---          | ---          | ---                                   | 0.073  | 1.052 | 8.27E-01 | 8.27E+01 |  |  |
| 8099670 | NM_00113072  | CCDC149      | coiled-coil domain containing 149     | 0.170  | 1.125 | 4.78E-01 | 4.78E+01 |  |  |
| 8099696 | NM_153825    | SEPSECS      | Sep (O-phosphoserine) tRNA:Sec (      | 0.031  | 1.022 | 9.09E-01 | 9.09E+01 |  |  |
| 8099721 | NM_015187    | KIAA0746     | KIAA0746 protein                      | 0.121  | 1.087 | 2.23E-01 | 2.23E+01 |  |  |
| 8099746 | NM_000730    | CKAR         | cholecystokinin A receptor            | -0.053 | 0.964 | 7.75E-01 | 7.75E+01 |  |  |
| 8099760 | NM_015230    | ARAP2        | ArGAP with RhoGAP domain, ank         | -0.083 | 0.944 | 6.85E-01 | 6.85E+01 |  |  |
| 8099797 | NM_00108539  | RELL1        | RELT-like 1                           | -0.025 | 0.983 | 8.71E-01 | 8.71E+01 |  |  |
| 8099807 | AF220235     | GAFA3        | FGF-2 activity-associated protein 3   | 0.086  | 1.061 | 6.70E-01 | 6.70E+01 |  |  |
| 8099817 | NR_026804    | FLJ13197     | hypothetical FLJ13197                 | 0.041  | 1.029 | 8.78E-01 | 8.78E+01 |  |  |
| 8099826 | NM_030956    | TLR10        | toll-like receptor 10                 | 0.174  | 1.128 | 5.21E-01 | 5.21E+01 |  |  |
| 8099841 | NM_006068    | TLR6         | toll-like receptor 6                  | 0.259  | 1.196 | 2.78E-01 | 2.78E+01 |  |  |
| 8099860 | NM_002913    | RFC1         | replication factor C (activator 1) 1  | 0.020  | 1.014 | 8.88E-01 | 8.88E+01 |  |  |

|         |              |           |                                         |        |       |          |          |  |  |
|---------|--------------|-----------|-----------------------------------------|--------|-------|----------|----------|--|--|
| 8099887 | NM_00102492  | RPL9      | ribosomal protein L9                    | 0.003  | 1.002 | 9.85E-01 | 9.85E+01 |  |  |
| 8099897 | NM_003359    | UGDH      | UDP-glucose dehydrogenase               | -0.007 | 0.995 | 9.84E-01 | 9.84E+01 |  |  |
| 8099912 | BC008502     | C4orf34   | chromosome 4 open reading frame         | 0.085  | 1.061 | 6.90E-01 | 6.90E+01 |  |  |
| 8099918 | AK291454     | UBE2K     | ubiquitin-conjugating enzyme E2K        | -0.030 | 0.979 | 8.49E-01 | 8.49E+01 |  |  |
| 8099922 | ---          | ---       | ---                                     | -0.023 | 0.984 | 9.74E-01 | 9.74E+01 |  |  |
| 8099924 | ---          | ---       | ---                                     | -0.062 | 0.958 | 5.91E-01 | 5.91E+01 |  |  |
| 8099926 | NM_00110039  | PDS5A     | PDS5, regulator of cohesion maintenance | 0.009  | 1.006 | 9.49E-01 | 9.49E+01 |  |  |
| 8099965 | NM_007274    | ACOT7     | acyl-CoA thioesterase 7                 | -0.083 | 0.944 | 6.74E-01 | 6.74E+01 |  |  |
| 8099967 | NM_00109863  | RBM47     | RNA binding motif protein 47            | 0.397  | 1.317 | 1.07E-01 | 1.07E+01 |  |  |
| 8100001 | ---          | ---       | ---                                     | -0.005 | 0.997 | 9.86E-01 | 9.86E+01 |  |  |
| 8100015 | NM_207406    | BEND4     | BEN domain containing 4                 | 0.017  | 1.012 | 9.34E-01 | 9.34E+01 |  |  |
| 8100026 | NM_006095    | ATP8A1    | ATPase, aminophospholipid transporting  | 0.049  | 1.034 | 8.39E-01 | 8.39E+01 |  |  |
| 8100068 | ---          | ---       | ---                                     | -0.033 | 0.977 | 8.57E-01 | 8.57E+01 |  |  |
| 8100070 | NM_198353    | KCTD8     | potassium channel tetramerisation       | -0.040 | 0.973 | 7.33E-01 | 7.33E+01 |  |  |
| 8100125 | ---          | ---       | ---                                     | -0.042 | 0.972 | 9.04E-01 | 9.04E+01 |  |  |
| 8100179 | NM_152995    | NFXL1     | nuclear transcription factor, X-box     | 0.119  | 1.086 | 4.88E-01 | 4.88E+01 |  |  |
| 8100210 | NM_003328    | TXK       | TXK tyrosine kinase                     | 0.205  | 1.152 | 3.44E-01 | 3.44E+01 |  |  |
| 8100227 | ---          | ---       | ---                                     | 0.035  | 1.024 | 9.07E-01 | 9.07E+01 |  |  |
| 8100251 | NM_015030    | FRYL      | FRY-like                                | -0.031 | 0.978 | 8.71E-01 | 8.71E+01 |  |  |
| 8100292 | NM_015030    | FRYL      | FRY-like                                | 0.041  | 1.029 | 7.29E-01 | 7.29E+01 |  |  |
| 8100298 | NM_00101444  | OCIAD2    | OCIA domain containing 2                | -0.241 | 0.846 | 1.66E-01 | 1.66E+01 |  |  |
| 8100308 | ---          | ---       | ---                                     | -0.044 | 0.970 | 9.36E-01 | 9.36E+01 |  |  |
| 8100310 | ---          | ---       | ---                                     | -0.240 | 0.847 | 6.35E-01 | 6.35E+01 |  |  |
| 8100328 | NM_022832    | USP46     | ubiquitin specific peptidase 46         | 0.078  | 1.055 | 6.04E-01 | 6.04E+01 |  |  |
| 8100347 | NM_152540    | SCFD2     | sec1 family domain containing 2         | 0.052  | 1.037 | 8.46E-01 | 8.46E+01 |  |  |
| 8100362 | NM_00112632  | LNX1      | ligand of numb-protein X 1              | 0.066  | 1.046 | 5.04E-01 | 5.04E+01 |  |  |
| 8100376 | ---          | ---       | ---                                     | -0.068 | 0.954 | 6.69E-01 | 6.69E+01 |  |  |
| 8100378 | NR_027153    | RPL21P44  | ribosomal protein L21 pseudogene        | -0.089 | 0.940 | 6.94E-01 | 6.94E+01 |  |  |
| 8100382 | NM_012110    | CHIC2     | cysteine-rich hydrophobic domain        | -0.093 | 0.938 | 3.83E-01 | 3.83E+01 |  |  |
| 8100426 | ---          | ---       | ---                                     | -0.110 | 0.926 | 4.10E-01 | 4.10E+01 |  |  |
| 8100428 | NM_004898    | CLOCK     | clock homolog (mouse)                   | 0.056  | 1.040 | 8.27E-01 | 8.27E+01 |  |  |
| 8100456 | ---          | ---       | ---                                     | 0.130  | 1.095 | 6.47E-01 | 6.47E+01 |  |  |
| 8100495 | NM_002703    | PPAT      | phosphoribosyl pyrophosphate an         | 0.130  | 1.094 | 4.26E-01 | 4.26E+01 |  |  |
| 8100532 | NM_032313    | C4orf14   | chromosome 4 open reading frame         | -0.023 | 0.984 | 8.92E-01 | 8.92E+01 |  |  |
| 8100541 | NM_001553    | IGFBP7    | insulin-like growth factor binding      | -0.051 | 0.965 | 7.27E-01 | 7.27E+01 |  |  |
| 8100603 | NM_001812    | CENPC1    | centromere protein C 1                  | -0.067 | 0.954 | 7.78E-01 | 7.78E+01 |  |  |
| 8100615 | NM_018227    | UBA6      | ubiquitin-like modifier activating e    | -0.073 | 0.951 | 5.65E-01 | 5.65E+01 |  |  |
| 8100714 | NM_00103173  | YTHDC1    | YTH domain containing 1                 | -0.083 | 0.944 | 2.08E-01 | 2.08E+01 |  |  |
| 8100754 | ---          | ---       | ---                                     | 0.039  | 1.028 | 8.21E-01 | 8.21E+01 |  |  |
| 8100782 | ---          | ---       | ---                                     | -0.031 | 0.979 | 8.13E-01 | 8.13E+01 |  |  |
| 8100834 | NM_002092    | GRSF1     | G-rich RNA sequence binding facto       | 0.010  | 1.007 | 9.54E-01 | 9.54E+01 |  |  |
| 8100851 | ---          | ---       | ---                                     | 0.045  | 1.032 | 8.05E-01 | 8.05E+01 |  |  |
| 8100893 | NM_173827    | COX18     | COX18 cytochrome c oxidase asse         | 0.134  | 1.098 | 2.93E-01 | 2.93E+01 |  |  |
| 8100902 | NM_032217    | ANKRD17   | ankyrin repeat domain 17                | -0.002 | 0.998 | 9.86E-01 | 9.86E+01 |  |  |
| 8100941 | ---          | ---       | ---                                     | 0.069  | 1.049 | 9.04E-01 | 9.04E+01 |  |  |
| 8100962 | ---          | ---       | ---                                     | -0.080 | 0.946 | 4.66E-01 | 4.66E+01 |  |  |
| 8100964 | ---          | ---       | ---                                     | -0.093 | 0.938 | 5.06E-01 | 5.06E+01 |  |  |
| 8100966 | NM_002619    | PF4       | platelet factor 4                       | 0.179  | 1.132 | 7.17E-02 | 7.17E+00 |  |  |
| 8100971 | NM_002704    | PPBP      | pro-platelet basic protein (chemok      | 0.230  | 1.173 | 7.94E-01 | 7.94E+01 |  |  |
| 8101000 | ENST00000437 | LOC541467 | hypothetical LOC541467                  | -0.011 | 0.992 | 9.49E-01 | 9.49E+01 |  |  |
| 8101013 | NM_015436    | RCHY1     | ring finger and CHY zinc finger do      | 0.014  | 1.009 | 9.53E-01 | 9.53E+01 |  |  |
| 8101043 | NM_203505    | G3BP2     | GTPase activating protein (SH3 do       | -0.029 | 0.980 | 8.33E-01 | 8.33E+01 |  |  |
| 8101061 | ---          | ---       | ---                                     | 0.042  | 1.030 | 8.40E-01 | 8.40E+01 |  |  |
| 8101065 | NM_006239    | PPEF2     | protein phosphatase, EF-hand calc       | 0.066  | 1.047 | 6.39E-01 | 6.39E+01 |  |  |
| 8101086 | NM_014435    | NAAA      | N-acyl ethanolamine acid amidase        | 0.155  | 1.114 | 5.23E-01 | 5.23E+01 |  |  |
| 8101141 | ---          | ---       | ---                                     | 0.012  | 1.008 | 9.53E-01 | 9.53E+01 |  |  |
| 8101210 | ---          | ---       | ---                                     | -0.294 | 0.816 | 6.19E-02 | 6.19E+00 |  |  |
| 8101212 | NM_006835    | CCNI      | cyclin I                                | 0.049  | 1.035 | 5.34E-01 | 5.34E+01 |  |  |
| 8101224 | ---          | ---       | ---                                     | 0.013  | 1.009 | 9.64E-01 | 9.64E+01 |  |  |
| 8101228 | NM_144571    | CNOT6L    | CCR4-NOT transcription complex,         | -0.062 | 0.958 | 6.57E-01 | 6.57E+01 |  |  |
| 8101253 | NM_032693    | ARD1B     | ARD1 homolog B (S. cerevisiae)          | -0.006 | 0.996 | 9.83E-01 | 9.83E+01 |  |  |
| 8101260 | NM_058172    | ANTXR2    | anthrax toxin receptor 2                | -0.191 | 0.876 | 7.47E-02 | 7.47E+00 |  |  |
| 8101324 | NM_031370    | HNRNPD    | heterogeneous nuclear ribonucleo        | -0.007 | 0.995 | 9.39E-01 | 9.39E+01 |  |  |
| 8101340 | NR_003249    | HNRNPD    | heterogeneous nuclear ribonucleo        | -0.008 | 0.994 | 9.49E-01 | 9.49E+01 |  |  |
| 8101366 | NM_00103758  | SCD5      | stearoyl-CoA desaturase 5               | -0.091 | 0.939 | 4.53E-01 | 4.53E+01 |  |  |
| 8101376 | NM_014933    | SEC31A    | SEC31 homolog A (S. cerevisiae)         | 0.079  | 1.056 | 2.75E-01 | 2.75E+01 |  |  |
| 8101429 | NM_016619    | PLAC8     | placenta-specific 8                     | -0.097 | 0.935 | 7.78E-01 | 7.78E+01 |  |  |
| 8101437 | NM_015697    | COQ2      | coenzyme Q2 homolog, prenyltran         | -0.050 | 0.966 | 7.55E-01 | 7.55E+01 |  |  |
| 8101449 | NM_00109854  | HPSE      | heparanase                              | -0.397 | 0.759 | 1.27E-01 | 1.27E+01 |  |  |
| 8101489 | NM_139076    | FAM175A   | family with sequence similarity 17      | -0.050 | 0.966 | 8.36E-01 | 8.36E+01 |  |  |
| 8101507 | NM_006168    | NKX6-1    | NK6 homeobox 1                          | -0.040 | 0.973 | 6.97E-01 | 6.97E+01 |  |  |
| 8101511 | NM_014991    | WDFY3     | WD repeat and FYVE domain cont          | 0.429  | 1.347 | 2.07E-01 | 2.07E+01 |  |  |
| 8101609 | NM_197965    | SLC10A6   | solute carrier family 10 (sodium/b      | -0.007 | 0.995 | 9.75E-01 | 9.75E+01 |  |  |
| 8101622 | NM_138501    | TECR      | trans-2,3-enoyl-CoA reductase           | -0.080 | 0.946 | 6.24E-01 | 6.24E+01 |  |  |
| 8101624 | NM_020803    | KLHL8     | kelch-like 8 (Drosophila)               | 0.128  | 1.093 | 1.82E-01 | 1.82E+01 |  |  |
| 8101648 | NM_016245    | HSD17B11  | hydroxysteroid (17-beta) dehydro        | 0.066  | 1.047 | 7.87E-01 | 7.87E+01 |  |  |
| 8101657 | ---          | ---       | ---                                     | -0.061 | 0.959 | 7.62E-01 | 7.62E+01 |  |  |

|         |                   |              |                                                          |        |       |          |          |  |  |
|---------|-------------------|--------------|----------------------------------------------------------|--------|-------|----------|----------|--|--|
| 8101699 | ---               | ---          | ---                                                      | 0.112  | 1.081 | 6.54E-01 | 6.54E+01 |  |  |
| 8101701 | NM_152542         | PPM1K        | protein phosphatase 1K (PP2C do                          | 0.033  | 1.023 | 8.97E-01 | 8.97E+01 |  |  |
| 8101718 | NM_032906         | PIGY         | phosphatidylinositol glycan ancho                        | 0.061  | 1.043 | 5.79E-01 | 5.79E+01 |  |  |
| 8101723 | NM_153757         | NAP1L5       | nucleosome assembly protein 1-li                         | 0.016  | 1.011 | 9.27E-01 | 9.27E+01 |  |  |
| 8101728 | NM_014883         | FAM13A       | family with sequence similarity 13                       | 0.120  | 1.086 | 4.48E-01 | 4.48E+01 |  |  |
| 8101757 | NM_198281         | GPRIN3       | GPRIN family member 3                                    | 0.040  | 1.028 | 8.11E-01 | 8.11E+01 |  |  |
| 8101762 | NM_000345         | SNCA         | synuclein, alpha (non A4 compone                         | 0.296  | 1.228 | 2.11E-02 | 2.11E+00 |  |  |
| 8101774 | NM_183049         | TMSL3        | thymosin-like 3                                          | -0.009 | 0.994 | 9.22E-01 | 9.22E+01 |  |  |
| 8101828 | NM_005723         | TSPAN5       | tetraspanin 5                                            | -0.235 | 0.850 | 2.26E-01 | 2.26E+01 |  |  |
| 8101839 | NM_001968         | EIF4E        | eukaryotic translation initiation fa                     | 0.029  | 1.020 | 8.73E-01 | 8.73E+01 |  |  |
| 8101844 | NM_000671         | ADH5         | alcohol dehydrogenase 5 (class III)                      | 0.006  | 1.004 | 9.83E-01 | 9.83E+01 |  |  |
| 8101925 | NM_021970         | MAPKSP1      | MAPK scaffold protein 1                                  | 0.045  | 1.032 | 8.40E-01 | 8.40E+01 |  |  |
| 8101934 | NM_00103172       | DNAJB14      | DnaJ (Hsp40) homolog, subfamily                          | 0.050  | 1.035 | 6.73E-01 | 6.73E+01 |  |  |
| 8101945 | NM_002106         | H2AFZ        | H2A histone family, member Z                             | -0.111 | 0.926 | 3.70E-01 | 3.70E+01 |  |  |
| 8101971 | NM_000944         | PPP3CA       | protein phosphatase 3 (formerly 2                        | 0.013  | 1.009 | 9.56E-01 | 9.56E+01 |  |  |
| 8101992 | NM_022154         | SLC39A8      | solute carrier family 39 (zinc trans                     | 0.056  | 1.039 | 9.56E-01 | 9.56E+01 |  |  |
| 8102006 | NM_005908         | MANBA        | mannosidase, beta A, lysosomal                           | 0.155  | 1.113 | 6.04E-01 | 6.04E+01 |  |  |
| 8102024 | NM_181886         | UBE2D3       | ubiquitin-conjugating enzyme E2D                         | -0.019 | 0.987 | 9.19E-01 | 9.19E+01 |  |  |
| 8102037 | ---               | ---          | ---                                                      | 0.061  | 1.043 | 8.89E-01 | 8.89E+01 |  |  |
| 8102050 | NM_178833         | NHEDC2       | Na <sup>+</sup> /H <sup>+</sup> exchanger domain contain | -0.133 | 0.912 | 3.94E-01 | 3.94E+01 |  |  |
| 8102171 | NM_033115         | TBCK         | TBC1 domain containing kinase                            | 0.096  | 1.069 | 6.13E-01 | 6.13E+01 |  |  |
| 8102214 | NM_005443         | PAPSS1       | 3'-phosphoadenosine 5'-phosphos                          | 0.299  | 1.230 | 2.41E-01 | 2.41E+01 |  |  |
| 8102232 | NM_016269         | LEF1         | lymphoid enhancer-binding factor                         | 0.021  | 1.015 | 9.69E-01 | 9.69E+01 |  |  |
| 8102311 | NM_001226         | CASP6        | caspase 6, apoptosis-related cyste                       | -0.013 | 0.991 | 9.61E-01 | 9.61E+01 |  |  |
| 8102321 | NM_030821         | PLA2G12A     | phospholipase A2, group XIIA                             | -0.047 | 0.968 | 7.71E-01 | 7.71E+01 |  |  |
| 8102350 | ---               | ---          | ---                                                      | 0.192  | 1.142 | 6.47E-02 | 6.47E+00 |  |  |
| 8102368 | NM_024019         | NEUROG2      | neurogenin 2                                             | -0.034 | 0.977 | 7.12E-01 | 7.12E+01 |  |  |
| 8102410 | NM_001029         | RPS26        | ribosomal protein S26                                    | 0.013  | 1.009 | 9.77E-01 | 9.77E+01 |  |  |
| 8102415 | NM_001221         | CAMK2D       | calcium/calmodulin-dependent pr                          | 0.203  | 1.151 | 1.84E-01 | 1.84E+01 |  |  |
| 8102468 | NM_003619         | PRSS12       | protease, serine, 12 (neurotrypsin                       | 0.009  | 1.006 | 9.61E-01 | 9.61E+01 |  |  |
| 8102482 | NM_014822         | SEC24D       | SEC24 family, member D (S. cerevi                        | 0.106  | 1.076 | 5.72E-01 | 5.72E+01 |  |  |
| 8102518 | NM_00100170       | C4orf3       | chromosome 4 open reading fram                           | 0.008  | 1.005 | 9.49E-01 | 9.49E+01 |  |  |
| 8102530 | ---               | ---          | ---                                                      | 0.267  | 1.203 | 4.25E-01 | 4.25E+01 |  |  |
| 8102619 | NM_001154         | ANXA5        | annexin A5                                               | 0.092  | 1.066 | 7.75E-01 | 7.75E+01 |  |  |
| 8102636 | NM_152399         | TMEM155      | transmembrane protein 155                                | 0.002  | 1.001 | 9.93E-01 | 9.93E+01 |  |  |
| 8102643 | NM_001237         | CCNA2        | cyclin A2                                                | 0.184  | 1.136 | 1.05E-01 | 1.05E+01 |  |  |
| 8102695 | ---               | ---          | ---                                                      | -0.002 | 0.999 | 9.94E-01 | 9.94E+01 |  |  |
| 8102728 | ---               | ---          | ---                                                      | 0.019  | 1.013 | 9.63E-01 | 9.63E+01 |  |  |
| 8102730 | NM_152778         | MFSB8        | major facilitator superfamily dom                        | -0.023 | 0.984 | 9.18E-01 | 9.18E+01 |  |  |
| 8102745 | NM_006320         | PGRMC2       | progesterone receptor membrane                           | 0.004  | 1.003 | 9.85E-01 | 9.85E+01 |  |  |
| 8102751 | NM_144643         | SCLT1        | sodium channel and clathrin linker                       | 0.200  | 1.149 | 3.54E-02 | 3.54E+00 |  |  |
| 8102781 | ENST00000330      | LOC100292301 | similar to hCG1993567                                    | 0.045  | 1.032 | 8.87E-01 | 8.87E+01 |  |  |
| 8102783 | ---               | ---          | ---                                                      | -0.008 | 0.994 | 9.75E-01 | 9.75E+01 |  |  |
| 8102789 | NM_017489         | TERF1        | telomeric repeat binding factor (N                       | -0.074 | 0.950 | 5.91E-01 | 5.91E+01 |  |  |
| 8102817 | NM_201999         | ELF2         | E74-like factor 2 (ets domain trans                      | -0.047 | 0.968 | 7.32E-01 | 7.32E+01 |  |  |
| 8102839 | NM_002494         | NDUFC1       | NADH dehydrogenase (ubiquinone                           | -0.028 | 0.981 | 8.78E-01 | 8.78E+01 |  |  |
| 8102848 | NM_030648         | SETD7        | SET domain containing (lysine met                        | 0.065  | 1.046 | 8.18E-01 | 8.18E+01 |  |  |
| 8102860 | NM_002107 //H3F3A | H3F3A        | H3 histone, family 3A // H3 histon                       | 0.099  | 1.071 | 3.19E-01 | 3.19E+01 |  |  |
| 8102862 | NM_018717         | MAML3        | mastermind-like 3 (Drosophila)                           | -0.072 | 0.951 | 6.23E-01 | 6.23E+01 |  |  |
| 8102869 | ---               | ---          | ---                                                      | -0.065 | 0.956 | 7.86E-01 | 7.86E+01 |  |  |
| 8102875 | ---               | ---          | ---                                                      | 0.020  | 1.014 | 9.49E-01 | 9.49E+01 |  |  |
| 8102912 | NM_015130         | TBC1D9       | TBC1 domain family, member 9 (w                          | -0.043 | 0.971 | 9.05E-01 | 9.05E+01 |  |  |
| 8102950 | NM_003866         | INPP4B       | inositol polyphosphate-4-phospha                         | -0.019 | 0.987 | 9.66E-01 | 9.66E+01 |  |  |
| 8102979 | ---               | ---          | ---                                                      | 0.096  | 1.069 | 7.38E-01 | 7.38E+01 |  |  |
| 8102982 | BC064848          | GAB1         | GRB2-associated binding protein 1                        | -0.090 | 0.939 | 3.35E-01 | 3.35E+01 |  |  |
| 8102984 | ---               | ---          | ---                                                      | -0.005 | 0.996 | 9.81E-01 | 9.81E+01 |  |  |
| 8103005 | NM_014885         | ANAPC10      | anaphase promoting complex sub                           | 0.142  | 1.103 | 5.44E-01 | 5.44E+01 |  |  |
| 8103011 | NM_199324         | OTUD4        | OTU domain containing 4                                  | 0.137  | 1.100 | 3.55E-01 | 3.55E+01 |  |  |
| 8103023 | ---               | ---          | ---                                                      | -0.071 | 0.952 | 7.01E-01 | 7.01E+01 |  |  |
| 8103025 | NM_178835         | ZNF827       | zinc finger protein 827                                  | -0.093 | 0.937 | 4.55E-01 | 4.55E+01 |  |  |
| 8103043 | NM_00102999       | SLC10A7      | solute carrier family 10 (sodium/b                       | 0.149  | 1.108 | 1.74E-01 | 1.74E+01 |  |  |
| 8103079 | NM_138364         | PRMT10       | protein arginine methyltransferas                        | -0.087 | 0.941 | 7.18E-01 | 7.18E+01 |  |  |
| 8103094 | NM_000901         | NR3C2        | nuclear receptor subfamily 3, grou                       | -0.038 | 0.974 | 8.74E-01 | 8.74E+01 |  |  |
| 8103106 | NM_006726         | LRBA         | LPS-responsive vesicle trafficking,                      | 0.002  | 1.001 | 9.93E-01 | 9.93E+01 |  |  |
| 8103188 | NM_004564         | PET112L      | PET112-like (yeast)                                      | 0.115  | 1.083 | 2.53E-01 | 2.53E+01 |  |  |
| 8103206 | NM_033632         | FBXW7        | F-box and WD repeat domain cont                          | -0.068 | 0.954 | 5.23E-01 | 5.23E+01 |  |  |
| 8103222 | ---               | ---          | ---                                                      | 0.053  | 1.037 | 5.58E-01 | 5.58E+01 |  |  |
| 8103226 | NM_152680         | TMEM154      | transmembrane protein 154                                | 0.279  | 1.213 | 8.79E-02 | 8.79E+00 |  |  |
| 8103240 | NR_001562         | ANXA2P1      | annexin A2 pseudogene 1                                  | 0.106  | 1.076 | 6.03E-01 | 6.03E+01 |  |  |
| 8103244 | NM_173662         | RNF175       | ring finger protein 175                                  | -0.216 | 0.861 | 2.91E-01 | 2.91E+01 |  |  |
| 8103289 | NM_002669         | PLRG1        | pleiotropic regulator 1 (PRL1 hom                        | 0.041  | 1.029 | 8.05E-01 | 8.05E+01 |  |  |
| 8103309 | ---               | ---          | ---                                                      | 0.025  | 1.018 | 9.58E-01 | 9.58E+01 |  |  |
| 8103389 | NM_001334         | CTSO         | cathepsin O                                              | 0.177  | 1.130 | 4.59E-01 | 4.59E+01 |  |  |
| 8103413 | ---               | ---          | ---                                                      | -0.083 | 0.944 | 7.85E-01 | 7.85E+01 |  |  |
| 8103431 | NM_00100839       | C4orf46      | chromosome 4 open reading fram                           | -0.085 | 0.943 | 5.17E-01 | 5.17E+01 |  |  |
| 8103437 | NM_005038         | PPID         | peptidylprolyl isomerase D                               | -0.002 | 0.998 | 9.90E-01 | 9.90E+01 |  |  |
| 8103483 | ---               | ---          | ---                                                      | 0.369  | 1.291 | 3.44E-01 | 3.44E+01 |  |  |

|         |                            |              |                                      |        |       |          |          |  |  |
|---------|----------------------------|--------------|--------------------------------------|--------|-------|----------|----------|--|--|
| 8103518 | NM_012403                  | ANP32C       | acidic (leucine-rich) nuclear phosph | -0.010 | 0.993 | 9.38E-01 | 9.38E+01 |  |  |
| 8103520 | NM_00101241                | TRIM61       | tripartite motif-containing 61       | 0.068  | 1.048 | 7.73E-01 | 7.73E+01 |  |  |
| 8103535 | NR_026575                  | GK3P         | glycerol kinase 3 pseudogene         | -0.083 | 0.944 | 6.34E-01 | 6.34E+01 |  |  |
| 8103563 | NM_017631                  | DDX60        | DEAD (Asp-Glu-Ala-Asp) box polyp     | 0.191  | 1.141 | 5.63E-01 | 5.63E+01 |  |  |
| 8103601 | NM_00101296                | DDX60L       | DEAD (Asp-Glu-Ala-Asp) box polyp     | 0.078  | 1.056 | 8.63E-01 | 8.63E+01 |  |  |
| 8103622 | NM_032783                  | CBR4         | carbonyl reductase 4                 | 0.071  | 1.051 | 6.18E-01 | 6.18E+01 |  |  |
| 8103646 | NM_012224                  | NEK1         | NIMA (never in mitosis gene a)-rel   | -0.202 | 0.869 | 1.07E-01 | 1.07E+01 |  |  |
| 8103684 | NM_017867                  | C4orf27      | chromosome 4 open reading fram       | -0.036 | 0.975 | 8.76E-01 | 8.76E+01 |  |  |
| 8103725 | ---                        | ---          | ---                                  | 0.032  | 1.022 | 9.12E-01 | 9.12E+01 |  |  |
| 8103728 | NM_00113068                | HMGB2        | high-mobility group box 2            | -0.054 | 0.963 | 8.10E-01 | 8.10E+01 |  |  |
| 8103743 | ---                        | ---          | ---                                  | 0.029  | 1.020 | 8.13E-01 | 8.13E+01 |  |  |
| 8103753 | NM_006792                  | MORF4        | mortality factor 4                   | -0.046 | 0.968 | 7.09E-01 | 7.09E+01 |  |  |
| 8103755 | NM_012180                  | FBXO8        | F-box protein 8                      | 0.045  | 1.032 | 7.99E-01 | 7.99E+01 |  |  |
| 8103822 | NM_005429                  | VEGFC        | vascular endothelial growth factor   | 0.022  | 1.015 | 8.68E-01 | 8.68E+01 |  |  |
| 8103834 | NM_000027                  | AGA          | aspartylglucosaminidase              | 0.158  | 1.115 | 2.21E-01 | 2.21E+01 |  |  |
| 8103847 | ---                        | ---          | ---                                  | -0.049 | 0.967 | 9.12E-01 | 9.12E+01 |  |  |
| 8103853 | NR_027107                  | MGC45800     | hypothetical LOC90768                | -0.023 | 0.984 | 8.88E-01 | 8.88E+01 |  |  |
| 8103859 | NM_00101273                | DCTD         | dCMP deaminase                       | 0.023  | 1.016 | 9.03E-01 | 9.03E+01 |  |  |
| 8103873 | ---                        | ---          | ---                                  | -0.064 | 0.957 | 5.74E-01 | 5.74E+01 |  |  |
| 8103875 | ---                        | ---          | ---                                  | 0.152  | 1.111 | 5.07E-01 | 5.07E+01 |  |  |
| 8103881 | NM_152682                  | RWDD4A       | RWD domain containing 4A             | 0.075  | 1.053 | 6.59E-01 | 6.59E+01 |  |  |
| 8103911 | NM_002199                  | IRF2         | interferon regulatory factor 2       | 0.047  | 1.033 | 7.99E-01 | 7.99E+01 |  |  |
| 8103922 | NM_004346                  | CASP3        | caspase 3, apoptosis-related cyste   | -0.013 | 0.991 | 9.71E-01 | 9.71E+01 |  |  |
| 8103951 | NM_001995                  | ACSL1        | acyl-CoA synthetase long-chain fat   | -0.282 | 0.822 | 3.83E-01 | 3.83E+01 |  |  |
| 8103975 | NR_003542                  | UNQ9368      | RTFV9368                             | -0.218 | 0.860 | 2.78E-01 | 2.78E+01 |  |  |
| 8103979 | NM_020827                  | KIAA1430     | KIAA1430                             | -0.035 | 0.976 | 8.74E-01 | 8.74E+01 |  |  |
| 8104012 | ---                        | ---          | ---                                  | 0.155  | 1.114 | 6.41E-01 | 6.41E+01 |  |  |
| 8104070 | ---                        | ---          | ---                                  | -0.056 | 0.962 | 8.06E-01 | 8.06E+01 |  |  |
| 8104072 | ENST00000423               | FLJ38576     | hypothetical LOC651430               | -0.007 | 0.995 | 9.73E-01 | 9.73E+01 |  |  |
| 8104115 | ---                        | ---          | ---                                  | 0.041  | 1.029 | 7.97E-01 | 7.97E+01 |  |  |
| 8104119 | NM_020040                  | TUBB4Q       | tubulin, beta polypeptide 4, mem     | 0.117  | 1.084 | 4.13E-01 | 4.13E+01 |  |  |
| 8104122 | NM_033178                  | DUX4         | double homeobox, 4                   | -0.025 | 0.983 | 8.13E-01 | 8.13E+01 |  |  |
| 8104136 | NM_018942                  | HMX1         | H6 family homeobox 1                 | 0.017  | 1.012 | 8.96E-01 | 8.96E+01 |  |  |
| 8104139 | NR_027420 // B9834 // LOC3 |              | ankyrin repeat domain 57 pseudog     | -0.015 | 0.990 | 9.85E-01 | 9.85E+01 |  |  |
| 8104141 | NM_052909                  | PLEKHG4B     | pleckstrin homology domain conta     | -0.042 | 0.971 | 7.15E-01 | 7.15E+01 |  |  |
| 8104166 | NM_004168                  | SDHA         | succinate dehydrogenase complex      | -0.021 | 0.985 | 9.16E-01 | 9.16E+01 |  |  |
| 8104180 | NM_020731                  | AHRR         | aryl-hydrocarbon receptor repress    | -0.045 | 0.969 | 7.17E-01 | 7.17E+01 |  |  |
| 8104201 | NM_007277                  | EXOC3        | exocyst complex component 3          | -0.035 | 0.976 | 7.86E-01 | 7.86E+01 |  |  |
| 8104220 | NM_018140                  | CEP72        | centrosomal protein 72kDa            | -0.045 | 0.969 | 6.31E-01 | 6.31E+01 |  |  |
| 8104253 | NM_033120                  | NKD2         | naked cuticle homolog 2 (Drosoph     | 0.020  | 1.014 | 8.62E-01 | 8.62E+01 |  |  |
| 8104268 | NM_00100384                | SLC6A19      | solute carrier family 6 (neutral am  | 0.030  | 1.021 | 8.41E-01 | 8.41E+01 |  |  |
| 8104281 | NM_182632                  | SLC6A18      | solute carrier family 6, member 18   | -0.026 | 0.982 | 8.36E-01 | 8.36E+01 |  |  |
| 8104298 | NM_004553                  | NDUFS6       | NADH dehydrogenase (ubiquinone       | -0.023 | 0.984 | 8.96E-01 | 8.96E+01 |  |  |
| 8104307 | AY249325                   | C5orf38      | chromosome 5 open reading fram       | 0.040  | 1.028 | 7.83E-01 | 7.83E+01 |  |  |
| 8104314 | NM_024337                  | IRX1         | iroquois homeobox 1                  | 0.033  | 1.023 | 7.82E-01 | 7.82E+01 |  |  |
| 8104319 | ---                        | ---          | ---                                  | -0.014 | 0.990 | 9.27E-01 | 9.27E+01 |  |  |
| 8104321 | NM_139056                  | ADAMTS16     | ADAM metallopeptidase with thro      | 0.002  | 1.001 | 9.90E-01 | 9.90E+01 |  |  |
| 8104348 | ---                        | ---          | ---                                  | 0.043  | 1.030 | 9.03E-01 | 9.03E+01 |  |  |
| 8104350 | NM_015325                  | KIAA0947     | KIAA0947                             | 0.030  | 1.021 | 8.44E-01 | 8.44E+01 |  |  |
| 8104369 | NM_001047                  | SRD5A1       | steroid-5-alpha-reductase, alpha p   | -0.026 | 0.982 | 8.92E-01 | 8.92E+01 |  |  |
| 8104378 | NM_006999                  | POLS         | polymerase (DNA directed) sigma      | -0.026 | 0.982 | 8.98E-01 | 8.98E+01 |  |  |
| 8104394 | NM_020546                  | ADCY2        | adenylate cyclase 2 (brain)          | -0.005 | 0.996 | 9.73E-01 | 9.73E+01 |  |  |
| 8104422 | NM_002454                  | MTRR         | 5-methyltetrahydrofolate-homocy      | 0.043  | 1.030 | 7.52E-01 | 7.52E+01 |  |  |
| 8104449 | NM_012073                  | CCT5         | chaperonin containing TCP1, subu     | 0.032  | 1.022 | 8.78E-01 | 8.78E+01 |  |  |
| 8104461 | ---                        | ---          | ---                                  | -0.019 | 0.987 | 9.56E-01 | 9.56E+01 |  |  |
| 8104463 | NM_005885                  | 40243        | membrane-associated ring finger      | -0.012 | 0.991 | 9.44E-01 | 9.44E+01 |  |  |
| 8104499 | ENST00000296               | ANKRD33B     | ankyrin repeat domain 33B            | -0.024 | 0.983 | 8.43E-01 | 8.43E+01 |  |  |
| 8104506 | NM_007118                  | TRIO         | triple functional domain (PTPRF in   | -0.021 | 0.986 | 9.49E-01 | 9.49E+01 |  |  |
| 8104568 | AY358688                   | UNQ1870      | GALI1870                             | -0.043 | 0.970 | 8.70E-01 | 8.70E+01 |  |  |
| 8104570 | NM_019018                  | FAM105A      | family with sequence similarity 10   | 0.296  | 1.227 | 4.59E-02 | 4.59E+00 |  |  |
| 8104580 | NM_138348                  | FAM105B      | family with sequence similarity 10   | -0.205 | 0.868 | 3.31E-02 | 3.31E+00 |  |  |
| 8104590 | AK129556                   | LOC100130744 | hypothetical LOC100130744            | -0.154 | 0.899 | 4.69E-02 | 4.69E+00 |  |  |
| 8104592 | NM_012304                  | FBXL7        | F-box and leucine-rich repeat prot   | -0.028 | 0.981 | 8.30E-01 | 8.30E+01 |  |  |
| 8104601 | NM_006317                  | BASP1        | brain abundant, membrane attach      | -0.228 | 0.854 | 5.46E-02 | 5.46E+00 |  |  |
| 8104609 | ---                        | ---          | ---                                  | -0.079 | 0.947 | 5.30E-01 | 5.30E+01 |  |  |
| 8104613 | ENST00000330               | // LOC391742 | TBP-associated factor 11 pseudoge    | 0.028  | 1.019 | 8.78E-01 | 8.78E+01 |  |  |
| 8104617 | XM_936262 // B1764 // LOC3 |              | similar to TBP-associated factor 11  | 0.029  | 1.020 | 8.33E-01 | 8.33E+01 |  |  |
| 8104621 | NR_003660                  | GUSBL2       | glucuronidase, beta-like 2           | 0.012  | 1.009 | 9.76E-01 | 9.76E+01 |  |  |
| 8104693 | NM_178140                  | PDZD2        | PDZ domain containing 2              | -0.009 | 0.994 | 9.63E-01 | 9.63E+01 |  |  |
| 8104725 | ---                        | ---          | ---                                  | 0.080  | 1.057 | 5.12E-01 | 5.12E+01 |  |  |
| 8104727 | ---                        | ---          | ---                                  | 0.038  | 1.026 | 8.11E-01 | 8.11E+01 |  |  |
| 8104731 | ---                        | ---          | ---                                  | 0.166  | 1.122 | 1.24E-01 | 1.24E+01 |  |  |
| 8104738 | NM_006713                  | SUB1         | SUB1 homolog (S. cerevisiae)         | 0.077  | 1.055 | 2.39E-01 | 2.39E+01 |  |  |
| 8104760 | NM_152295                  | TARS         | threonyl-tRNA synthetase             | -0.080 | 0.946 | 5.55E-01 | 5.55E+01 |  |  |
| 8104781 | NM_016568                  | RXFP3        | relaxin/insulin-like family peptide  | -0.029 | 0.980 | 7.94E-01 | 7.94E+01 |  |  |
| 8104825 | NM_018321                  | BXDC2        | brix domain containing 2             | 0.021  | 1.015 | 9.53E-01 | 9.53E+01 |  |  |
| 8104838 | NM_194283                  | DNAJC21      | DnaJ (Hsp40) homolog, subfamily      | -0.055 | 0.962 | 5.73E-01 | 5.73E+01 |  |  |

|         |             |              |                                         |        |       |          |          |  |  |
|---------|-------------|--------------|-----------------------------------------|--------|-------|----------|----------|--|--|
| 8104901 | NM_002185   | IL7R         | interleukin 7 receptor                  | -0.220 | 0.859 | 1.89E-02 | 1.89E+00 |  |  |
| 8104912 | NM_005983   | SKP2         | S-phase kinase-associated protein       | 0.038  | 1.026 | 8.68E-01 | 8.68E+01 |  |  |
| 8104930 | NM_004172   | SLC1A3       | solute carrier family 1 (glial high a   | 0.661  | 1.581 | 7.07E-02 | 7.07E+00 |  |  |
| 8104944 | NM_015384   | NIPBL        | Nipped-B homolog (Drosophila)           | -0.030 | 0.979 | 8.08E-01 | 8.08E+01 |  |  |
| 8104996 | ---         | ---          | ---                                     | 0.014  | 1.009 | 9.66E-01 | 9.66E+01 |  |  |
| 8104998 | NM_018034   | WDR70        | WD repeat domain 70                     | 0.109  | 1.079 | 2.81E-01 | 2.81E+01 |  |  |
| 8105061 | NM_001465   | FYB          | FYN binding protein (FYB-120/130        | 0.253  | 1.192 | 1.90E-02 | 1.90E+00 |  |  |
| 8105063 | ---         | ---          | ---                                     | -0.062 | 0.958 | 4.29E-01 | 4.29E+01 |  |  |
| 8105067 | NM_000958   | PTGER4       | prostaglandin E receptor 4 (subtyp      | 0.008  | 1.006 | 9.71E-01 | 9.71E+01 |  |  |
| 8105104 | NM_175921   | C5orf51      | chromosome 5 open reading fram          | 0.074  | 1.053 | 6.62E-01 | 6.62E+01 |  |  |
| 8105132 | AK123995    | LOC153684    | hypothetical LOC153684                  | 0.048  | 1.034 | 7.38E-01 | 7.38E+01 |  |  |
| 8105136 | NM_003432   | ZNF131       | zinc finger protein 131                 | -0.122 | 0.919 | 4.67E-01 | 4.67E+01 |  |  |
| 8105144 | ---         | ---          | ---                                     | -0.043 | 0.971 | 8.45E-01 | 8.45E+01 |  |  |
| 8105146 | NM_153361   | MGC42105     | serine/threonine-protein kinase N       | -0.131 | 0.913 | 2.47E-01 | 2.47E+01 |  |  |
| 8105153 | NM_012343   | NNT          | nicotinamide nucleotide transhyd        | 0.109  | 1.079 | 2.99E-01 | 2.99E+01 |  |  |
| 8105181 | NM_016640   | MRPS30       | mitochondrial ribosomal protein S       | 0.055  | 1.039 | 6.83E-01 | 6.83E+01 |  |  |
| 8105189 | BC137195    | LOC10028761  | hypothetical protein LOC1002876         | -0.078 | 0.947 | 5.61E-01 | 5.61E+01 |  |  |
| 8105191 | NM_024615   | PARP8        | poly (ADP-ribose) polymerase fam        | -0.011 | 0.992 | 9.65E-01 | 9.65E+01 |  |  |
| 8105311 | NM_002495   | NDUFS4       | NADH dehydrogenase (ubiquinone          | 0.238  | 1.179 | 3.32E-03 | 3.32E-01 |  |  |
| 8105321 | ---         | ---          | ---                                     | -0.050 | 0.966 | 9.05E-01 | 9.05E+01 |  |  |
| 8105328 | NM_052870   | SNX18        | sorting nexin 18                        | -0.018 | 0.988 | 9.49E-01 | 9.49E+01 |  |  |
| 8105331 | NM_002104   | GZMK         | granzyme K (granzyme 3; tryptase        | 0.395  | 1.315 | 3.22E-01 | 3.22E+01 |  |  |
| 8105353 | NM_015360   | SKIV2L2      | superkiller viralicidic activity 2-like | 0.047  | 1.033 | 6.23E-01 | 6.23E+01 |  |  |
| 8105432 | NM_021104   | RPL41        | ribosomal protein L41                   | 0.003  | 1.002 | 9.73E-01 | 9.73E+01 |  |  |
| 8105434 | ---         | ---          | ---                                     | -0.013 | 0.991 | 9.74E-01 | 9.74E+01 |  |  |
| 8105436 | NM_005921   | MAP3K1       | mitogen-activated protein kinase f      | 0.103  | 1.074 | 4.09E-01 | 4.09E+01 |  |  |
| 8105463 | NM_022913   | GPBP1        | GC-rich promoter binding protein        | -0.052 | 0.964 | 5.82E-01 | 5.82E+01 |  |  |
| 8105499 | NM_174889   | NDUFAF2      | NADH dehydrogenase (ubiquinone          | 0.022  | 1.016 | 9.27E-01 | 9.27E+01 |  |  |
| 8105504 | NM_152789   | FAM133B      | family with sequence similarity 13      | 0.051  | 1.036 | 6.85E-01 | 6.85E+01 |  |  |
| 8105506 | NM_020928   | ZSWIM6       | zinc finger, SWIM-type containing       | 0.107  | 1.077 | 6.23E-01 | 6.23E+01 |  |  |
| 8105523 | NM_004520   | KIF2A        | kinesin heavy chain member 2A           | 0.004  | 1.003 | 9.81E-01 | 9.81E+01 |  |  |
| 8105612 | NM_005869   | SDCCAG10     | serologically defined colon cancer      | 0.080  | 1.057 | 4.82E-01 | 4.82E+01 |  |  |
| 8105631 | ---         | ---          | ---                                     | -0.081 | 0.945 | 2.52E-01 | 2.52E+01 |  |  |
| 8105633 | NM_015342   | PPWD1        | peptidylprolyl isomerase domain a       | 0.011  | 1.008 | 9.55E-01 | 9.55E+01 |  |  |
| 8105647 | NM_00109375 | C5orf44      | chromosome 5 open reading fram          | 0.110  | 1.079 | 4.39E-01 | 4.39E+01 |  |  |
| 8105681 | NM_018695   | ERBB2IP      | erb2 interacting protein                | 0.007  | 1.005 | 9.73E-01 | 9.73E+01 |  |  |
| 8105714 | NM_139168   | SFRS12       | splicing factor, arginine/serine-ric    | -0.017 | 0.988 | 9.09E-01 | 9.09E+01 |  |  |
| 8105739 | ---         | ---          | ---                                     | -0.046 | 0.969 | 8.02E-01 | 8.02E+01 |  |  |
| 8105741 | NM_015183   | MAST4        | microtubule associated serine/thr       | -0.096 | 0.935 | 2.44E-01 | 2.44E+01 |  |  |
| 8105778 | NM_181523   | PIK3R1       | phosphoinositide-3-kinase, regula       | -0.093 | 0.937 | 6.22E-01 | 6.22E+01 |  |  |
| 8105801 | NM_022902   | SLC30A5      | solute carrier family 30 (zinc trans    | -0.019 | 0.987 | 9.16E-01 | 9.16E+01 |  |  |
| 8105878 | NM_133338   | RAD17        | RAD17 homolog (S. pombe)                | 0.093  | 1.067 | 5.96E-01 | 5.96E+01 |  |  |
| 8105908 | NM_002538   | OCLN         | occludin                                | -0.149 | 0.902 | 7.02E-01 | 7.02E+01 |  |  |
| 8105918 | NM_001515   | GTF2H2       | general transcription factor IIH, po    | 0.083  | 1.059 | 6.95E-01 | 6.95E+01 |  |  |
| 8105935 | AK302597    | POM121L8P    | POM121 membrane glycoprotein-           | 0.199  | 1.148 | 4.09E-01 | 4.09E+01 |  |  |
| 8105937 | AK289851    | SMA5         | glucuronidase, beta pseudogene          | -0.019 | 0.987 | 9.59E-01 | 9.59E+01 |  |  |
| 8105958 | NM_000344   | SMN1         | survival of motor neuron 1, telom       | -0.005 | 0.996 | 9.82E-01 | 9.82E+01 |  |  |
| 8105970 | NM_001515   | GTF2H2       | general transcription factor IIH, po    | 0.083  | 1.059 | 7.15E-01 | 7.15E+01 |  |  |
| 8105987 | ---         | ---          | ---                                     | 0.123  | 1.089 | 3.85E-01 | 3.85E+01 |  |  |
| 8105989 | AK302597    | POM121L8P    | POM121 membrane glycoprotein-           | 0.192  | 1.143 | 4.05E-01 | 4.05E+01 |  |  |
| 8105991 | BC171739    | GUSBL1       | glucuronidase, beta-like 1              | -0.007 | 0.995 | 9.85E-01 | 9.85E+01 |  |  |
| 8105995 | AK289851    | SMA5         | glucuronidase, beta pseudogene          | 0.006  | 1.004 | 9.87E-01 | 9.87E+01 |  |  |
| 8106006 | NM_000344   | SMN1         | survival of motor neuron 1, telom       | 0.010  | 1.007 | 9.63E-01 | 9.63E+01 |  |  |
| 8106017 | ---         | ---          | ---                                     | -0.025 | 0.983 | 9.51E-01 | 9.51E+01 |  |  |
| 8106025 | NM_018429   | BDP1         | B double prime 1, subunit of RNA        | -0.065 | 0.956 | 5.23E-01 | 5.23E+01 |  |  |
| 8106068 | NM_022132   | MCCC2        | methylcrotonoyl-Coenzyme A carb         | 0.048  | 1.034 | 8.04E-01 | 8.04E+01 |  |  |
| 8106096 | ---         | ---          | ---                                     | 0.054  | 1.038 | 6.42E-01 | 6.42E+01 |  |  |
| 8106098 | NM_005909   | MAP1B        | microtubule-associated protein 1B       | -0.068 | 0.954 | 5.84E-01 | 5.84E+01 |  |  |
| 8106107 | NM_024754   | PTCD2        | pentatricopeptide repeat domain         | 0.082  | 1.058 | 6.41E-01 | 6.41E+01 |  |  |
| 8106122 | NM_002270   | TNPO1        | transportin 1                           | -0.018 | 0.988 | 9.18E-01 | 9.18E+01 |  |  |
| 8106181 | NM_00103763 | BTF3         | basic transcription factor 3            | 0.007  | 1.005 | 9.68E-01 | 9.68E+01 |  |  |
| 8106250 | ---         | ---          | ---                                     | -0.007 | 0.995 | 9.69E-01 | 9.69E+01 |  |  |
| 8106252 | NM_000521   | HEXB         | hexosaminidase B (beta polypepti        | 0.345  | 1.270 | 1.10E-01 | 1.10E+01 |  |  |
| 8106271 | NM_014886   | TINP1        | TGF beta-inducible nuclear protein      | 0.052  | 1.036 | 7.61E-01 | 7.61E+01 |  |  |
| 8106278 | ---         | ---          | ---                                     | -0.033 | 0.978 | 9.54E-01 | 9.54E+01 |  |  |
| 8106280 | NM_000859   | HMGCR        | 3-hydroxy-3-methylglutaryl-Coenz        | -0.086 | 0.942 | 5.48E-01 | 5.48E+01 |  |  |
| 8106352 | XM_00171851 | LOC100129566 | hypothetical protein LOC1001295         | 0.016  | 1.011 | 9.49E-01 | 9.49E+01 |  |  |
| 8106354 | NM_006633   | IQGAP2       | IQ motif containing GTPase activat      | 0.315  | 1.244 | 1.48E-02 | 1.48E+00 |  |  |
| 8106393 | NM_001992   | F2R          | coagulation factor II (thrombin) re     | -0.096 | 0.935 | 7.45E-01 | 7.45E+01 |  |  |
| 8106403 | NM_005242   | F2RL1        | coagulation factor II (thrombin) re     | -0.111 | 0.926 | 2.42E-01 | 2.42E+01 |  |  |
| 8106429 | NM_018046   | AGGF1        | angiogenic factor with G patch an       | 0.083  | 1.059 | 3.29E-01 | 3.29E+01 |  |  |
| 8106473 | ---         | ---          | ---                                     | -0.015 | 0.990 | 9.49E-01 | 9.49E+01 |  |  |
| 8106475 | ---         | ---          | ---                                     | 0.077  | 1.055 | 6.66E-01 | 6.66E+01 |  |  |
| 8106479 | NM_004866   | SCAMP1       | secretory carrier membrane prote        | -0.081 | 0.945 | 5.83E-01 | 5.83E+01 |  |  |
| 8106516 | NM_152405   | JMY          | junction mediating and regulatory       | -0.259 | 0.836 | 1.36E-01 | 1.36E+01 |  |  |
| 8106528 | ---         | ---          | ---                                     | -0.232 | 0.852 | 3.55E-01 | 3.55E+01 |  |  |
| 8106530 | ---         | ---          | ---                                     | -0.056 | 0.962 | 7.53E-01 | 7.53E+01 |  |  |



|         |             |              |                                                                      |        |       |          |          |  |  |
|---------|-------------|--------------|----------------------------------------------------------------------|--------|-------|----------|----------|--|--|
| 8106532 | ---         | ---          | ---                                                                  | 0.008  | 1.005 | 9.80E-01 | 9.80E+01 |  |  |
| 8106534 | NM_00111439 | PAPD4        | PAP associated domain containing                                     | 0.158  | 1.116 | 2.36E-02 | 2.36E+00 |  |  |
| 8106573 | NM_003248   | THBS4        | thrombospondin 4                                                     | -0.021 | 0.985 | 9.18E-01 | 9.18E+01 |  |  |
| 8106633 | NM_002439   | MSH3         | mutS homolog 3 (E. coli)                                             | 0.092  | 1.066 | 5.55E-01 | 5.55E+01 |  |  |
| 8106660 | NM_006909   | RASGRF2      | Ras protein-specific guanine nucleotide                              | 0.095  | 1.068 | 7.17E-01 | 7.17E+01 |  |  |
| 8106689 | NM_001825   | CKMT2        | creatine kinase, mitochondrial 2 (skeletal muscle)                   | -0.111 | 0.926 | 2.53E-01 | 2.53E+01 |  |  |
| 8106702 | NM_032280   | ZCCHC9       | zinc finger, CCHC domain containing 9                                | 0.004  | 1.003 | 9.85E-01 | 9.85E+01 |  |  |
| 8106709 | NM_031482   | ATG10        | ATG10 autophagy related 10 homolog                                   | -0.063 | 0.958 | 8.66E-01 | 8.66E+01 |  |  |
| 8106722 | NM_00101797 | ATP6AP1L     | ATPase, H+ transporting, lysosomal 6, isoform 1-like                 | 0.204  | 1.152 | 7.19E-02 | 7.19E+00 |  |  |
| 8106730 | NM_022550   | XRCC4        | X-ray repair complementing defective                                 | 0.117  | 1.085 | 6.65E-01 | 6.65E+01 |  |  |
| 8106743 | NM_004385   | VCAN         | versican                                                             | 0.012  | 1.008 | 9.94E-01 | 9.94E+01 |  |  |
| 8106761 | ---         | ---          | ---                                                                  | 0.041  | 1.029 | 8.05E-01 | 8.05E+01 |  |  |
| 8106769 | XR_019029   | LOC645181    | similar to PDGFA associated protein                                  | 0.021  | 1.015 | 9.16E-01 | 9.16E+01 |  |  |
| 8106776 | NM_001867   | COX7C        | cytochrome c oxidase subunit VIIc                                    | -0.031 | 0.979 | 8.48E-01 | 8.48E+01 |  |  |
| 8106784 | NM_002890   | RASA1        | RAS p21 protein activator (GTPase)                                   | 0.039  | 1.027 | 7.59E-01 | 7.59E+01 |  |  |
| 8106820 | NM_006467   | POLR3G       | polymerase (RNA) III (DNA directed)                                  | 0.059  | 1.042 | 7.94E-01 | 7.94E+01 |  |  |
| 8106923 | NM_005654   | NR2F1        | nuclear receptor subfamily 2, group 1                                | 0.049  | 1.034 | 7.27E-01 | 7.27E+01 |  |  |
| 8106976 | NM_199243   | GPR150       | G protein-coupled receptor 150                                       | -0.040 | 0.973 | 7.07E-01 | 7.07E+01 |  |  |
| 8107005 | NM_001750   | CAST         | calpastatin                                                          | 0.075  | 1.053 | 5.52E-01 | 5.52E+01 |  |  |
| 8107044 | NM_022350   | ERAP2        | endoplasmic reticulum aminopeptidase 2                               | -0.013 | 0.991 | 9.84E-01 | 9.84E+01 |  |  |
| 8107066 | NM_005575   | LNPEP        | leucyl/cystinyl aminopeptidase                                       | 0.052  | 1.037 | 5.77E-01 | 5.77E+01 |  |  |
| 8107090 | ---         | ---          | ---                                                                  | -0.036 | 0.976 | 8.27E-01 | 8.27E+01 |  |  |
| 8107094 | ---         | ---          | ---                                                                  | 0.088  | 1.063 | 6.57E-01 | 6.57E+01 |  |  |
| 8107096 | ---         | ---          | ---                                                                  | 0.052  | 1.037 | 7.52E-01 | 7.52E+01 |  |  |
| 8107098 | ---         | ---          | ---                                                                  | -0.004 | 0.997 | 9.86E-01 | 9.86E+01 |  |  |
| 8107115 | ---         | ---          | ---                                                                  | -0.022 | 0.985 | 8.66E-01 | 8.66E+01 |  |  |
| 8107119 | NM_198507   | FAM174A      | family with sequence similarity 174                                  | -0.091 | 0.939 | 7.31E-01 | 7.31E+01 |  |  |
| 8107129 | NM_180991   | SLCO4C1      | solute carrier organic anion transporter family 4, class C, member 1 | 0.294  | 1.226 | 7.47E-02 | 7.47E+00 |  |  |
| 8107133 | NM_000919   | PAM          | peptidylglycine alpha-amidating monooxygenase                        | 0.051  | 1.036 | 7.34E-01 | 7.34E+01 |  |  |
| 8107164 | NM_015216   | HISPPD1      | histidine acid phosphatase domain                                    | 0.277  | 1.211 | 7.02E-03 | 7.02E-01 |  |  |
| 8107204 | ---         | ---          | ---                                                                  | 0.013  | 1.009 | 9.50E-01 | 9.50E+01 |  |  |
| 8107234 | NM_002372   | MAN2A1       | mannosidase, alpha, class 2A, member 1                               | 0.209  | 1.156 | 9.20E-03 | 9.20E-01 |  |  |
| 8107259 | NM_138773   | SLC25A46     | solute carrier family 25, member 46                                  | 0.087  | 1.062 | 3.12E-01 | 3.12E+01 |  |  |
| 8107282 | NM_139281   | WDR36        | WD repeat domain 36                                                  | 0.095  | 1.068 | 5.15E-01 | 5.15E+01 |  |  |
| 8107307 | NM_001744   | CAMK4        | calcium/calmodulin-dependent protein kinase 4                        | -0.166 | 0.891 | 3.93E-01 | 3.93E+01 |  |  |
| 8107321 | AB048207    | CSorf26      | chromosome 5 open reading frame 26                                   | -0.032 | 0.978 | 9.01E-01 | 9.01E+01 |  |  |
| 8107328 | NR_027706   | FLJ11235     | hypothetical FLJ11235                                                | -0.045 | 0.969 | 7.33E-01 | 7.33E+01 |  |  |
| 8107348 | ---         | ---          | ---                                                                  | 0.163  | 1.120 | 1.09E-01 | 1.09E+01 |  |  |
| 8107350 | NM_003135   | SRP19        | signal recognition particle 19kDa                                    | -0.029 | 0.980 | 8.73E-01 | 8.73E+01 |  |  |
| 8107353 | BC104811    | ZRSR1        | zinc finger (CCCH type), RNA-binding                                 | -0.044 | 0.970 | 7.51E-01 | 7.51E+01 |  |  |
| 8107356 | NM_152624   | DCP2         | DCP2 decapping enzyme homolog                                        | 0.028  | 1.020 | 7.92E-01 | 7.92E+01 |  |  |
| 8107375 | NM_022828   | YTHDC2       | YTH domain containing 2                                              | 0.119  | 1.086 | 1.30E-01 | 1.30E+01 |  |  |
| 8107406 | ---         | ---          | ---                                                                  | -0.064 | 0.957 | 6.09E-01 | 6.09E+01 |  |  |
| 8107408 | NM_021614   | KCNN2        | potassium intermediate/small conductance                             | -0.038 | 0.974 | 6.66E-01 | 6.66E+01 |  |  |
| 8107421 | NM_001284   | AP3S1        | adaptor-related protein complex 3 sigma 1                            | 0.057  | 1.040 | 7.17E-01 | 7.17E+01 |  |  |
| 8107468 | ---         | ---          | ---                                                                  | -0.045 | 0.969 | 7.27E-01 | 7.27E+01 |  |  |
| 8107470 | NM_002823   | PTMA         | prothymosin, alpha                                                   | -0.010 | 0.993 | 9.31E-01 | 9.31E+01 |  |  |
| 8107474 | NM_005509   | DMXL1        | Dmx-like 1                                                           | 0.278  | 1.212 | 1.79E-02 | 1.79E+00 |  |  |
| 8107518 | ---         | ---          | ---                                                                  | 0.250  | 1.189 | 2.56E-01 | 2.56E+01 |  |  |
| 8107520 | NM_014350   | TNFAIP8      | tumor necrosis factor, alpha-inducible                               | 0.020  | 1.014 | 9.13E-01 | 9.13E+01 |  |  |
| 8107530 | ---         | ---          | ---                                                                  | 0.010  | 1.007 | 9.67E-01 | 9.67E+01 |  |  |
| 8107578 | NM_152546   | SRFBP1       | serum response factor binding protein 1                              | 0.161  | 1.118 | 1.58E-01 | 1.58E+01 |  |  |
| 8107594 | NM_005460   | SNCAIP       | synuclein, alpha interacting protein                                 | 0.053  | 1.037 | 6.24E-01 | 6.24E+01 |  |  |
| 8107644 | ---         | ---          | ---                                                                  | -0.028 | 0.981 | 8.86E-01 | 8.86E+01 |  |  |
| 8107646 | NM_00113623 | PRDM6        | PR domain containing 6                                               | -0.001 | 0.999 | 9.93E-01 | 9.93E+01 |  |  |
| 8107655 | NM_004384   | CSNK1G3      | casein kinase 1, gamma 3                                             | -0.021 | 0.986 | 8.84E-01 | 8.84E+01 |  |  |
| 8107671 | ---         | ---          | ---                                                                  | -0.066 | 0.955 | 6.96E-01 | 6.96E+01 |  |  |
| 8107673 | NM_023927   | GRAMD3       | GRAM domain containing 3                                             | -0.051 | 0.965 | 8.17E-01 | 8.17E+01 |  |  |
| 8107691 | NM_032177   | PHAX         | phosphorylated adaptor for RNA export                                | -0.007 | 0.995 | 9.80E-01 | 9.80E+01 |  |  |
| 8107706 | NM_005573   | LMNB1        | lamin B1                                                             | 0.084  | 1.060 | 7.68E-01 | 7.68E+01 |  |  |
| 8107720 | AK093561    | LOC100131792 | hypothetical LOC100131792                                            | -0.148 | 0.902 | 4.43E-01 | 4.43E+01 |  |  |
| 8107750 | NM_130809   | PRRC1        | proline-rich coiled-coil 1                                           | 0.094  | 1.067 | 5.04E-01 | 5.04E+01 |  |  |
| 8107769 | NM_001046   | SLC12A2      | solute carrier family 12 (sodium/potassium)                          | -0.012 | 0.992 | 9.63E-01 | 9.63E+01 |  |  |
| 8107814 | NM_016048   | ISOC1        | isochorismatase domain containing                                    | 0.007  | 1.005 | 9.81E-01 | 9.81E+01 |  |  |
| 8107855 | NR_023344   | RNU6ATAC     | RNA, U6atac small nuclear (U12-dependent)                            | -0.093 | 0.938 | 5.48E-01 | 5.48E+01 |  |  |
| 8107868 | NM_020240   | CDC42SE2     | CDC42 small effector 2                                               | -0.040 | 0.973 | 7.38E-01 | 7.38E+01 |  |  |
| 8107897 | NM_003687   | PDLIM4       | PDZ and LIM domain 4                                                 | -0.032 | 0.978 | 7.71E-01 | 7.71E+01 |  |  |
| 8107920 | NM_003060   | SLC22A5      | solute carrier family 22 (organic cations)                           | 0.164  | 1.120 | 1.56E-01 | 1.56E+01 |  |  |
| 8107934 | ---         | ---          | ---                                                                  | 0.037  | 1.026 | 8.54E-01 | 8.54E+01 |  |  |
| 8107942 | NM_005732   | RAD50        | RAD50 homolog (S. cerevisiae)                                        | 0.065  | 1.046 | 5.94E-01 | 5.94E+01 |  |  |
| 8107985 | NM_00103978 | CCNI2        | cyclin I family, member 2                                            | 0.002  | 1.001 | 9.91E-01 | 9.91E+01 |  |  |
| 8107992 | NM_175873   | ANKRD43      | ankyrin repeat domain 43                                             | 0.006  | 1.004 | 9.73E-01 | 9.73E+01 |  |  |
| 8107996 | ---         | ---          | ---                                                                  | -0.072 | 0.951 | 7.25E-01 | 7.25E+01 |  |  |
| 8107998 | NM_014402   | UQCRCQ       | ubiquinol-cytochrome c reductase                                     | 0.043  | 1.031 | 7.35E-01 | 7.35E+01 |  |  |
| 8108006 | NM_052971   | LEAP2        | liver expressed antimicrobial peptide 2                              | -0.080 | 0.946 | 6.71E-01 | 6.71E+01 |  |  |
| 8108013 | ---         | ---          | ---                                                                  | 0.013  | 1.009 | 9.65E-01 | 9.65E+01 |  |  |
| 8108015 | NM_002154   | HSPA4        | heat shock 70kDa protein 4                                           | 0.075  | 1.053 | 5.38E-01 | 5.38E+01 |  |  |

|         |             |                |                                       |        |       |          |          |  |
|---------|-------------|----------------|---------------------------------------|--------|-------|----------|----------|--|
| 8108050 | NM_003202   | TCF7           | transcription factor 7 (T-cell specif | -0.020 | 0.986 | 9.53E-01 | 9.53E+01 |  |
| 8108066 | NM_003337   | UBE2B          | ubiquitin-conjugating enzyme E2B      | -0.057 | 0.962 | 5.29E-01 | 5.29E+01 |  |
| 8108080 | NM_015288   | PHF15          | PHD finger protein 15                 | -0.022 | 0.985 | 9.11E-01 | 9.11E+01 |  |
| 8108099 | NM_021982   | SEC24A         | SEC24 family, member A (S. cerevi     | 0.047  | 1.033 | 7.61E-01 | 7.61E+01 |  |
| 8108127 | NM_001745   | CAMLG          | calcium modulating ligand             | -0.085 | 0.943 | 5.27E-01 | 5.27E+01 |  |
| 8108134 | NM_014829   | DDX46          | DEAD (Asp-Glu-Ala-Asp) box polyp      | 0.006  | 1.004 | 9.64E-01 | 9.64E+01 |  |
| 8108161 | ---         | ---            | ---                                   | -0.024 | 0.983 | 9.58E-01 | 9.58E+01 |  |
| 8108163 | NM_152409   | C5orf24        | chromosome 5 open reading fram        | 0.007  | 1.005 | 9.74E-01 | 9.74E+01 |  |
| 8108166 | NM_024715   | TXNDC15        | thioredoxin domain containing 15      | -0.015 | 0.990 | 9.07E-01 | 9.07E+01 |  |
| 8108174 | NM_032151   | PCBD2          | pterin-4 alpha-carbinolamine dehy     | 0.075  | 1.054 | 7.25E-01 | 7.25E+01 |  |
| 8108180 | ---         | ---            | ---                                   | 0.007  | 1.005 | 9.77E-01 | 9.77E+01 |  |
| 8108192 | ---         | ---            | ---                                   | 0.025  | 1.018 | 8.86E-01 | 8.86E+01 |  |
| 8108199 | NM_145282   | LOC153328      | mitochondrial carrier protein-like    | -0.059 | 0.960 | 5.03E-01 | 5.03E+01 |  |
| 8108238 | NM_00100141 | SMAD5          | SMAD family member 5                  | 0.171  | 1.126 | 2.85E-01 | 2.85E+01 |  |
| 8108321 | NM_00113564 | FAM53C         | family with sequence similarity 53    | -0.020 | 0.987 | 9.19E-01 | 9.19E+01 |  |
| 8108330 | NM_016604   | KDM3B          | lysine (K)-specific demethylase 3B    | -0.017 | 0.988 | 9.06E-01 | 9.06E+01 |  |
| 8108359 | NM_016606   | REEP2          | receptor accessory protein 2          | 0.035  | 1.024 | 7.56E-01 | 7.56E+01 |  |
| 8108370 | NM_001964   | EGR1           | early growth response 1               | -0.124 | 0.918 | 2.35E-01 | 2.35E+01 |  |
| 8108376 | ---         | ---            | ---                                   | 0.085  | 1.061 | 4.48E-01 | 4.48E+01 |  |
| 8108378 | NM_001903   | CTNNA1         | catenin (cadherin-associated prote    | 0.182  | 1.135 | 4.83E-01 | 4.83E+01 |  |
| 8108399 | ---         | ---            | ---                                   | 0.103  | 1.074 | 5.52E-01 | 5.52E+01 |  |
| 8108403 | NM_199189   | MATR3          | matrin 3                              | 0.000  | 1.000 | 1.00E+00 | 1.00E+02 |  |
| 8108422 | ---         | ---            | ---                                   | 0.066  | 1.047 | 7.63E-01 | 7.63E+01 |  |
| 8108424 | NM_00103311 | PAIP2          | poly(A) binding protein interacting   | -0.050 | 0.966 | 5.42E-01 | 5.42E+01 |  |
| 8108435 | NM_181838   | UBE2D2         | ubiquitin-conjugating enzyme E2D      | 0.083  | 1.059 | 3.04E-01 | 3.04E+01 |  |
| 8108447 | NM_016463   | CXC5           | CXC finger 5                          | -0.028 | 0.981 | 8.66E-01 | 8.66E+01 |  |
| 8108453 | NM_032289   | PSD2           | pleckstrin and Sec7 domain contai     | 0.027  | 1.019 | 7.87E-01 | 7.87E+01 |  |
| 8108470 | ---         | ---            | ---                                   | 0.006  | 1.004 | 9.77E-01 | 9.77E+01 |  |
| 8108472 | NM_005859   | PURA           | purine-rich element binding prote     | -0.094 | 0.937 | 1.40E-01 | 1.40E+01 |  |
| 8108475 | NM_00100718 | C5orf53        | chromosome 5 open reading fram        | -0.036 | 0.975 | 8.70E-01 | 8.70E+01 |  |
| 8108478 | NM_032412   | C5orf32        | chromosome 5 open reading fram        | -0.129 | 0.915 | 3.32E-01 | 3.32E+01 |  |
| 8108483 | NM_031467   | SLC4A9         | solute carrier family 4, sodium bic   | -0.048 | 0.967 | 6.60E-01 | 6.60E+01 |  |
| 8108510 | NM_020690   | NKHD1-EIF4EBP3 | ANKHD1-EIF4EBP3 readthrough tr        | -0.014 | 0.990 | 8.87E-01 | 8.87E+01 |  |
| 8108558 | NM_080670   | SLC35A4        | solute carrier family 35, member 4    | 0.053  | 1.038 | 7.67E-01 | 7.67E+01 |  |
| 8108568 | NM_006083   | IK             | IK cytokine, down-regulator of HL     | -0.069 | 0.953 | 4.84E-01 | 4.84E+01 |  |
| 8108579 | NM_018502   | TMCO6          | transmembrane and coiled-coil do      | -0.056 | 0.962 | 5.94E-01 | 5.94E+01 |  |
| 8108593 | NM_017706   | WDR55          | WD repeat domain 55                   | -0.086 | 0.942 | 4.93E-01 | 4.93E+01 |  |
| 8108603 | NM_012208   | HARS2          | histidyl-tRNA synthetase 2, mitoch    | -0.058 | 0.961 | 6.33E-01 | 6.33E+01 |  |
| 8108620 | NM_144723   | ZMAT2          | zinc finger, matrin type 2            | 0.050  | 1.036 | 6.96E-01 | 6.96E+01 |  |
| 8108683 | NM_018936   | PCDHB2         | protocadherin beta 2                  | -0.030 | 0.979 | 8.88E-01 | 8.88E+01 |  |
| 8108716 | NM_020957   | PCDHB16        | protocadherin beta 16                 | -0.063 | 0.957 | 6.66E-01 | 6.66E+01 |  |
| 8108822 | NM_173828   | RELL2          | RELT-like 2                           | 0.009  | 1.006 | 9.63E-01 | 9.63E+01 |  |
| 8108832 | NM_014773   | KIAA0141       | KIAA0141                              | 0.005  | 1.003 | 9.82E-01 | 9.82E+01 |  |
| 8108847 | NM_183401   | RNF14          | ring finger protein 14                | 0.067  | 1.048 | 7.13E-01 | 7.13E+01 |  |
| 8108861 | NM_030571   | NDFIP1         | Nedd4 family interacting protein 1    | 0.036  | 1.025 | 8.62E-01 | 8.62E+01 |  |
| 8108873 | NM_015071   | ARHGAP26       | Rho GTPase activating protein 26      | -0.025 | 0.983 | 9.49E-01 | 9.49E+01 |  |
| 8108900 | NM_021182   | HMH1           | histocompatibility (minor) HB-1       | 0.048  | 1.034 | 7.38E-01 | 7.38E+01 |  |
| 8108912 | NM_152550   | SH3RF2         | SH3 domain containing ring finger     | -0.094 | 0.937 | 3.20E-01 | 3.20E+01 |  |
| 8108927 | NM_018989   | RBM27          | RNA binding motif protein 27          | 0.001  | 1.001 | 9.95E-01 | 9.95E+01 |  |
| 8108949 | NM_002700   | POU4F3         | POU class 4 homeobox 3                | 0.045  | 1.032 | 7.29E-01 | 7.29E+01 |  |
| 8108954 | NM_006706   | TCERG1         | transcription elongation regulator    | 0.003  | 1.002 | 9.86E-01 | 9.86E+01 |  |
| 8108977 | ---         | ---            | ---                                   | -0.087 | 0.942 | 4.29E-01 | 4.29E+01 |  |
| 8109062 | NM_205836   | FBXO38         | F-box protein 38                      | 0.063  | 1.044 | 5.95E-01 | 5.95E+01 |  |
| 8109086 | NM_000024   | ADRB2          | adrenergic, beta-2-, receptor, surf   | -0.010 | 0.993 | 9.70E-01 | 9.70E+01 |  |
| 8109093 | NM_014945   | ABLIM3         | actin binding LIM protein family, n   | -0.021 | 0.986 | 8.37E-01 | 8.37E+01 |  |
| 8109120 | NM_152406   | AFAP1L1        | actin filament associated protein 1   | -0.030 | 0.979 | 8.18E-01 | 8.18E+01 |  |
| 8109141 | NM_152407   | GRPEL2         | GrpE-like 2, mitochondrial (E. coli)  | 0.008  | 1.006 | 9.64E-01 | 9.64E+01 |  |
| 8109149 | NM_024028   | PCYOX1L        | prenylcysteine oxidase 1 like         | 0.055  | 1.039 | 6.15E-01 | 6.15E+01 |  |
| 8109157 | ---         | ---            | ---                                   | -0.007 | 0.995 | 9.73E-01 | 9.73E+01 |  |
| 8109179 | NM_133263   | PPARGC1B       | peroxisome proliferator-activated     | 0.055  | 1.039 | 5.38E-01 | 5.38E+01 |  |
| 8109201 | NM_014983   | HMGXB3         | HMG box domain containing 3           | -0.043 | 0.971 | 7.13E-01 | 7.13E+01 |  |
| 8109222 | NM_000971   | RPL7           | ribosomal protein L7                  | -0.035 | 0.976 | 8.08E-01 | 8.08E+01 |  |
| 8109226 | NM_001804   | CDX1           | caudal type homeobox 1                | -0.019 | 0.987 | 9.35E-01 | 9.35E+01 |  |
| 8109254 | NM_00113524 | TCOF1          | Treacher Collins-Franceschetti syn    | -0.012 | 0.992 | 9.28E-01 | 9.28E+01 |  |
| 8109283 | NM_001543   | NDST1          | N-deacetylase/N-sulfotransferase      | -0.144 | 0.905 | 3.17E-01 | 3.17E+01 |  |
| 8109305 | NM_007286   | SYNPO          | synaptopodin                          | -0.027 | 0.981 | 8.29E-01 | 8.29E+01 |  |
| 8109315 | NM_00112285 | MYOZ3          | myozenin 3                            | -0.013 | 0.991 | 9.50E-01 | 9.50E+01 |  |
| 8109326 | NM_032947   | MST150         | MSTP150                               | -0.232 | 0.851 | 1.97E-02 | 1.97E+00 |  |
| 8109333 | NM_002084   | GPX3           | glutathione peroxidase 3 (plasma)     | -0.206 | 0.867 | 1.48E-02 | 1.48E+00 |  |
| 8109344 | NM_000405   | GM2A           | GM2 ganglioside activator             | 0.449  | 1.365 | 7.17E-02 | 7.17E+00 |  |
| 8109368 | NM_005754   | G3BP1          | GTPase activating protein (SH3 do     | 0.046  | 1.032 | 7.69E-01 | 7.69E+01 |  |
| 8109407 | NM_198321   | GALNT10        | UDP-N-acetyl-alpha-D-galactosam       | -0.036 | 0.975 | 7.80E-01 | 7.80E+01 |  |
| 8109424 | ---         | ---            | ---                                   | -0.189 | 0.877 | 2.25E-01 | 2.25E+01 |  |
| 8109426 | AK090581    | GALNT10        | UDP-N-acetyl-alpha-D-galactosam       | -0.033 | 0.977 | 8.81E-01 | 8.81E+01 |  |
| 8109428 | NR_024084   | SAP30L         | SAP30-like                            | -0.029 | 0.980 | 9.01E-01 | 9.01E+01 |  |
| 8109438 | NM_033551   | LARP1          | La ribonucleoprotein domain fami      | 0.068  | 1.048 | 3.69E-01 | 3.69E+01 |  |
| 8109462 | NM_004779   | CNOT8          | CCR4-NOT transcription complex,       | 0.072  | 1.051 | 5.65E-01 | 5.65E+01 |  |

|         |             |           |                                      |        |       |          |          |
|---------|-------------|-----------|--------------------------------------|--------|-------|----------|----------|
| 8109475 | NM_014180   | MRPL22    | mitochondrial ribosomal protein L    | -0.055 | 0.963 | 7.87E-01 | 7.87E+01 |
| 8109486 | ---         | ---       | ---                                  | 0.060  | 1.042 | 6.71E-01 | 6.71E+01 |
| 8109505 | NR_002168   | PPP1R2P3  | protein phosphatase 1, regulatory    | 0.038  | 1.027 | 7.38E-01 | 7.38E+01 |
| 8109507 | NM_005546   | ITK       | IL2-inducible T-cell kinase          | -0.011 | 0.992 | 9.79E-01 | 9.79E+01 |
| 8109526 | ---         | ---       | ---                                  | 0.030  | 1.021 | 9.56E-01 | 9.56E+01 |
| 8109528 | NM_00103733 | CYFIP2    | cytoplasmic FMR1 interacting prot    | -0.072 | 0.952 | 6.32E-01 | 6.32E+01 |
| 8109563 | NM_00109928 | NIPAL4    | NIPA-like domain containing 4        | -0.154 | 0.899 | 5.71E-02 | 5.71E+00 |
| 8109576 | NM_017872   | THG1L     | tRNA-histidine guanylyltransferase   | -0.018 | 0.988 | 9.61E-01 | 9.61E+01 |
| 8109593 | ---         | ---       | ---                                  | -0.006 | 0.996 | 9.87E-01 | 9.87E+01 |
| 8109597 | NM_145049   | UBLCP1    | ubiquitin-like domain containing C   | -0.021 | 0.986 | 9.02E-01 | 9.02E+01 |
| 8109612 | NM_000679   | ADRA18    | adrenergic, alpha-1B-, receptor      | -0.045 | 0.969 | 5.91E-01 | 5.91E+01 |
| 8109620 | NM_003314   | TTC1      | tetratricopeptide repeat domain 1    | -0.022 | 0.985 | 9.00E-01 | 9.00E+01 |
| 8109629 | NM_00104044 | FABP6     | fatty acid binding protein 6, ileal  | -0.014 | 0.990 | 9.51E-01 | 9.51E+01 |
| 8109639 | NM_004219   | PTTG1     | pituitary tumor-transforming 1       | 0.104  | 1.075 | 6.83E-01 | 6.83E+01 |
| 8109693 | ---         | ---       | ---                                  | 0.023  | 1.016 | 8.75E-01 | 8.75E+01 |
| 8109697 | NM_004060   | CCNG1     | cyclin G1                            | -0.109 | 0.927 | 3.38E-01 | 3.38E+01 |
| 8109732 | NM_013283   | MAT2B     | methionine adenosyltransferase II    | 0.066  | 1.047 | 4.86E-01 | 4.86E+01 |
| 8109746 | ---         | ---       | ---                                  | -0.030 | 0.980 | 8.37E-01 | 8.37E+01 |
| 8109750 | NM_001002   | RPLP0     | ribosomal protein, large, P0         | -0.100 | 0.933 | 5.37E-01 | 5.37E+01 |
| 8109773 | NM_00116166 | WWC1      | WW and C2 domain containing 1        | -0.024 | 0.983 | 8.35E-01 | 8.35E+01 |
| 8109802 | NM_002887   | RARS      | arginyl-tRNA synthetase              | -0.010 | 0.993 | 9.65E-01 | 9.65E+01 |
| 8109819 | NR_024356   | FBL1      | fibrillarin-like 1                   | 0.037  | 1.026 | 7.63E-01 | 7.63E+01 |
| 8109821 | NM_006013   | RPL10     | ribosomal protein L10                | -0.030 | 0.979 | 8.48E-01 | 8.48E+01 |
| 8109843 | NM_004946   | DOCK2     | dedicator of cytokinesis 2           | 0.096  | 1.069 | 3.62E-01 | 3.62E+01 |
| 8109901 | NM_012188   | FOXI1     | forkhead box I1                      | -0.040 | 0.973 | 7.33E-01 | 7.33E+01 |
| 8109969 | NM_021025   | TLX3      | T-cell leukemia homeobox 3           | -0.031 | 0.979 | 8.92E-01 | 8.92E+01 |
| 8109981 | NM_003862   | FGF18     | fibroblast growth factor 18          | -0.007 | 0.995 | 9.56E-01 | 9.56E+01 |
| 8109999 | NM_00103171 | ERGIC1    | endoplasmic reticulum-golgi inter    | -0.033 | 0.978 | 9.12E-01 | 9.12E+01 |
| 8110022 | NM_003945   | ATP6V0E1  | ATPase, H+ transporting, lysosomal   | 0.103  | 1.074 | 3.49E-01 | 3.49E+01 |
| 8110032 | NM_153607   | C5orf41   | chromosome 5 open reading fram       | -0.059 | 0.960 | 6.42E-01 | 6.42E+01 |
| 8110043 | NM_013979   | BNIP1     | BCL2/adenovirus E1B 19kDa inter      | 0.011  | 1.008 | 9.76E-01 | 9.76E+01 |
| 8110055 | NM_030627   | CPEB4     | cytoplasmic polyadenylation elem     | 0.108  | 1.078 | 5.37E-01 | 5.37E+01 |
| 8110090 | NM_022754   | SFXN1     | sideroflexin 1                       | -0.079 | 0.947 | 7.60E-01 | 7.60E+01 |
| 8110106 | NM_00113105 | HRH2      | histamine receptor H2                | 0.030  | 1.021 | 8.74E-01 | 8.74E+01 |
| 8110114 | NM_006650   | CPLX2     | complexin 2                          | 0.002  | 1.001 | 9.90E-01 | 9.90E+01 |
| 8110123 | NM_00107952 | FAM153B   | family with sequence similarity 15   | 0.048  | 1.034 | 8.45E-01 | 8.45E+01 |
| 8110147 | NM_198567   | C5orf25   | chromosome 5 open reading fram       | -0.020 | 0.986 | 9.53E-01 | 9.53E+01 |
| 8110158 | NM_173664   | ARL10     | ADP-ribosylation factor-like 10      | -0.026 | 0.982 | 8.31E-01 | 8.31E+01 |
| 8110166 | NM_138820   | HIGD2A    | HIG1 hypoxia inducible domain fa     | 0.019  | 1.013 | 9.47E-01 | 9.47E+01 |
| 8110169 | NM_014613   | FAF2      | Fas associated factor family mem     | 0.018  | 1.012 | 9.56E-01 | 9.56E+01 |
| 8110183 | NM_017675   | PCDH24    | protocadherin 24                     | -0.049 | 0.967 | 6.31E-01 | 6.31E+01 |
| 8110218 | NM_00109940 | EIF4E1B   | eukaryotic translation initiation fa | 0.037  | 1.026 | 7.37E-01 | 7.37E+01 |
| 8110224 | NM_012171   | TSPAN17   | tetraspanin 17                       | -0.052 | 0.964 | 5.34E-01 | 5.34E+01 |
| 8110237 | NM_133369   | UNC5A     | unc-5 homolog A (C. elegans)         | 0.007  | 1.005 | 9.72E-01 | 9.72E+01 |
| 8110253 | NM_012279   | ZNF346    | zinc finger protein 346              | -0.045 | 0.969 | 8.29E-01 | 8.29E+01 |
| 8110265 | NM_213647   | FGFR4     | fibroblast growth factor receptor 4  | 0.024  | 1.017 | 8.44E-01 | 8.44E+01 |
| 8110289 | NM_022455   | NSD1      | nuclear receptor binding SET dom     | 0.005  | 1.004 | 9.78E-01 | 9.78E+01 |
| 8110318 | NM_013237   | PRELID1   | PRELI domain containing 1            | 0.087  | 1.062 | 6.46E-01 | 6.46E+01 |
| 8110327 | NM_006480   | RGS14     | regulator of G-protein signaling 14  | -0.046 | 0.969 | 5.87E-01 | 5.87E+01 |
| 8110347 | NM_003052   | SLC34A1   | solute carrier family 34 (sodium pl  | -0.018 | 0.988 | 9.27E-01 | 9.27E+01 |
| 8110362 | NM_00100410 | GRK6      | G protein-coupled receptor kinase    | -0.027 | 0.981 | 8.44E-01 | 8.44E+01 |
| 8110382 | NM_030567   | PRR7      | proline rich 7 (synaptic)            | -0.064 | 0.957 | 4.80E-01 | 4.80E+01 |
| 8110392 | NM_017510   | TMED9     | transmembrane emp24 protein tri      | 0.057  | 1.041 | 8.06E-01 | 8.06E+01 |
| 8110399 | NM_007255   | B4GALT7   | xylosylprotein beta 1,4-galactosyl   | -0.004 | 0.997 | 9.81E-01 | 9.81E+01 |
| 8110408 | NM_032361   | THOC3     | THO complex 3                        | -0.002 | 0.999 | 9.92E-01 | 9.92E+01 |
| 8110415 | NM_022491   | SUDS3     | suppressor of defective silencing 3  | 0.014  | 1.010 | 9.46E-01 | 9.46E+01 |
| 8110417 | NM_00107952 | FAM153C   | family with sequence similarity 15   | -0.022 | 0.985 | 9.57E-01 | 9.57E+01 |
| 8110427 | ---         | ---       | ---                                  | -0.029 | 0.980 | 8.46E-01 | 8.46E+01 |
| 8110430 | NM_015111   | N4BP3     | Nedd4 binding protein 3              | -0.035 | 0.976 | 8.17E-01 | 8.17E+01 |
| 8110437 | NM_022762   | RMND5B    | required for meiotic nuclear divisi  | 0.008  | 1.005 | 9.73E-01 | 9.73E+01 |
| 8110450 | NM_031266   | HNRNPAB   | heterogeneous nuclear ribonucleo     | 0.033  | 1.023 | 8.05E-01 | 8.05E+01 |
| 8110461 | ---         | ---       | ---                                  | 0.008  | 1.005 | 9.70E-01 | 9.70E+01 |
| 8110463 | NM_058230   | ZNF354B   | zinc finger protein 354B             | -0.073 | 0.950 | 6.57E-01 | 6.57E+01 |
| 8110499 | NM_025158   | RUFY1     | RUN and FYVE domain containing       | 0.089  | 1.063 | 3.72E-01 | 3.72E+01 |
| 8110518 | NM_00114230 | LOC285679 | hypothetical protein LOC285679       | -0.054 | 0.963 | 6.94E-01 | 6.94E+01 |
| 8110522 | NM_001746   | CANX      | calnexin                             | 0.153  | 1.112 | 1.96E-01 | 1.96E+01 |
| 8110546 | NM_014757   | MAML1     | mastermind-like 1 (Drosophila)       | -0.027 | 0.982 | 8.16E-01 | 8.16E+01 |
| 8110569 | NM_003900   | SQSTM1    | sequestosome 1                       | -0.165 | 0.892 | 1.32E-01 | 1.32E+01 |
| 8110589 | NM_015455   | CNOT6     | CCR4-NOT transcription complex,      | -0.077 | 0.948 | 5.64E-01 | 5.64E+01 |
| 8110618 | NM_006628   | ARPP19    | cAMP-regulated phosphoprotein,       | 0.036  | 1.025 | 9.01E-01 | 9.01E+01 |
| 8110631 | NM_152547   | BTNL9     | butyrophilin-like 9                  | -0.039 | 0.973 | 6.59E-01 | 6.59E+01 |
| 8110649 | NM_033549   | TRIM41    | tripartite motif-containing 41       | -0.016 | 0.989 | 9.35E-01 | 9.35E+01 |
| 8110666 | NM_032765   | TRIM52    | tripartite motif-containing 52       | -0.077 | 0.948 | 7.12E-01 | 7.12E+01 |
| 8110668 | ---         | ---       | ---                                  | 0.189  | 1.140 | 1.60E-01 | 1.60E+01 |
| 8110670 | NM_207366   | 40A35     | septin 14                            | -0.030 | 0.979 | 9.19E-01 | 9.19E+01 |
| 8110678 | NM_145265   | CCDC127   | coiled-coil domain containing 127    | -0.050 | 0.966 | 7.87E-01 | 7.87E+01 |
| 8110681 | NM_138464   | C5orf55   | chromosome 5 open reading fram       | -0.053 | 0.964 | 7.27E-01 | 7.27E+01 |

|         |              |              |                                     |        |       |          |          |  |  |
|---------|--------------|--------------|-------------------------------------|--------|-------|----------|----------|--|--|
| 8110685 | NR_024158    | LOC25845     | hypothetical LOC25845               | 0.048  | 1.034 | 7.89E-01 | 7.89E+01 |  |  |
| 8110688 | NM_004174    | SLC9A3       | solute carrier family 9 (sodium/hy  | -0.036 | 0.975 | 7.31E-01 | 7.31E+01 |  |  |
| 8110706 | ---          | ---          | ---                                 | -0.034 | 0.977 | 8.51E-01 | 8.51E+01 |  |  |
| 8110708 | NM_007030    | TPPP         | tubulin polymerization promoti      | -0.076 | 0.949 | 3.49E-01 | 3.49E+01 |  |  |
| 8110721 | NM_024786    | ZDHHC11      | zinc finger, DHHC-type containi     | -0.062 | 0.958 | 5.55E-01 | 5.55E+01 |  |  |
| 8110734 | NR_027633    | BRD9         | bromodomain containing 9            | -0.055 | 0.963 | 7.61E-01 | 7.61E+01 |  |  |
| 8110755 | NM_006598    | SLC12A7      | solute carrier family 12 (potassi   | -0.134 | 0.911 | 3.99E-02 | 3.99E+00 |  |  |
| 8110783 | NM_198253    | TERT         | telomerase reverse transcriptase    | -0.025 | 0.983 | 8.04E-01 | 8.04E+01 |  |  |
| 8110803 | NM_030782    | CLPTM1L      | CLPTM1-like                         | 0.165  | 1.121 | 5.88E-02 | 5.88E+00 |  |  |
| 8110821 | NM_001044    | SLC6A3       | solute carrier family 6 (neurotrans | -0.021 | 0.986 | 8.47E-01 | 8.47E+01 |  |  |
| 8110841 | NM_024830    | LPCAT1       | lysophosphatidylcholine acyltran    | -0.115 | 0.923 | 3.80E-01 | 3.80E+01 |  |  |
| 8110858 | AK295082     | PDCD6        | programmed cell death 6             | -0.020 | 0.986 | 9.49E-01 | 9.49E+01 |  |  |
| 8110861 | NM_032479    | MRPL36       | mitochondrial ribosomal protein L   | -0.053 | 0.964 | 7.90E-01 | 7.90E+01 |  |  |
| 8110872 | NM_033267    | IRX2         | iroquois homeobox 2                 | 0.045  | 1.032 | 7.04E-01 | 7.04E+01 |  |  |
| 8110882 | BC132707     | FLJ33360     | FLJ33360 protein                    | -0.032 | 0.978 | 8.74E-01 | 8.74E+01 |  |  |
| 8110886 | NM_032286    | MED10        | mediator complex subunit 10         | -0.005 | 0.996 | 9.81E-01 | 9.81E+01 |  |  |
| 8110894 | NM_017755    | NSUN2        | NOL1/NOP2/Sun domain family, n      | 0.004  | 1.003 | 9.86E-01 | 9.86E+01 |  |  |
| 8110914 | ---          | ---          | ---                                 | 0.002  | 1.001 | 9.89E-01 | 9.89E+01 |  |  |
| 8110916 | ENST00000382 | LOC442132    | similar to hypothetical protein FLJ | -0.104 | 0.931 | 5.04E-01 | 5.04E+01 |  |  |
| 8110932 | NM_003966    | SEMA5A       | sema domain, seven thrombospor      | 0.056  | 1.040 | 5.45E-01 | 5.45E+01 |  |  |
| 8110982 | NM_004394    | DAP          | death-associated protein            | 0.186  | 1.137 | 3.67E-02 | 3.67E+00 |  |  |
| 8110990 | NM_001332    | CTNND2       | catenin (cadherin-associated prot   | -0.001 | 0.999 | 9.93E-01 | 9.93E+01 |  |  |
| 8111099 | ---          | ---          | ---                                 | -0.036 | 0.975 | 8.82E-01 | 8.82E+01 |  |  |
| 8111101 | NM_054027    | ANKH         | ankylosis, progressive homolog (m   | -0.163 | 0.893 | 9.07E-02 | 9.07E+00 |  |  |
| 8111129 | NM_033414    | ZNF622       | zinc finger protein 622             | 0.078  | 1.056 | 6.16E-01 | 6.16E+01 |  |  |
| 8111136 | NM_00103485  | FAM134B      | family with sequence similarity 13  | -0.142 | 0.906 | 5.02E-01 | 5.02E+01 |  |  |
| 8111151 | ---          | ---          | ---                                 | 0.041  | 1.029 | 9.53E-01 | 9.53E+01 |  |  |
| 8111203 | NR_027253    | LOC285696    | hypothetical LOC285696              | -0.049 | 0.967 | 7.17E-01 | 7.17E+01 |  |  |
| 8111210 | ---          | ---          | ---                                 | 0.006  | 1.004 | 9.83E-01 | 9.83E+01 |  |  |
| 8111214 | XM_00113113  | LOC729724    | similar to TBP-associated factor 1  | -0.016 | 0.989 | 9.27E-01 | 9.27E+01 |  |  |
| 8111216 | ENST00000426 | LOC391769    | histone cluster 2, H3c pseudogene   | -0.013 | 0.991 | 9.25E-01 | 9.25E+01 |  |  |
| 8111286 | NM_013235    | RNASEN       | ribonuclease type III, nuclear      | -0.108 | 0.928 | 3.40E-01 | 3.40E+01 |  |  |
| 8111331 | NM_022130    | GOLPH3       | golgi phosphoprotein 3 (coat-pro    | 0.034  | 1.024 | 7.13E-01 | 7.13E+01 |  |  |
| 8111339 | NM_00104044  | MTMR12       | myotubularin related protein 12     | 0.025  | 1.018 | 9.07E-01 | 9.07E+01 |  |  |
| 8111360 | NM_016107    | ZFR          | zinc finger RNA binding protein     | 0.046  | 1.032 | 5.26E-01 | 5.26E+01 |  |  |
| 8111430 | NM_014324    | AMACR        | alpha-methylacyl-CoA racemase       | 0.065  | 1.046 | 5.67E-01 | 5.67E+01 |  |  |
| 8111443 | NM_181435    | C1QTNF3      | C1q and tumor necrosis factor rela  | 0.048  | 1.034 | 8.32E-01 | 8.32E+01 |  |  |
| 8111455 | NR_003504    | GUSBL1       | glucuronidase, beta-like 1          | 0.014  | 1.010 | 9.71E-01 | 9.71E+01 |  |  |
| 8111457 | NM_002853    | RAD1         | RAD1 homolog (S. pombe)             | 0.012  | 1.008 | 9.60E-01 | 9.60E+01 |  |  |
| 8111552 | NM_00108541  | C5orf33      | chromosome 5 open reading fram      | -0.038 | 0.974 | 8.44E-01 | 8.44E+01 |  |  |
| 8111584 | BC144069     | C5orf42      | chromosome 5 open reading fram      | -0.037 | 0.975 | 8.66E-01 | 8.66E+01 |  |  |
| 8111629 | NM_153485    | NUP155       | nucleoporin 155kDa                  | 0.066  | 1.047 | 5.48E-01 | 5.48E+01 |  |  |
| 8111666 | ---          | ---          | ---                                 | 0.136  | 1.099 | 5.06E-01 | 5.06E+01 |  |  |
| 8111698 | NM_152756    | RICTOR       | RPTOR independent companion of      | 0.010  | 1.007 | 9.67E-01 | 9.67E+01 |  |  |
| 8111739 | NM_001465    | FYB          | FYN binding protein (FYB-120/130    | 0.221  | 1.166 | 1.48E-02 | 1.48E+00 |  |  |
| 8111772 | NM_001343    | DAB2         | disabled homolog 2, mitogen-resp    | 0.435  | 1.352 | 2.82E-01 | 2.82E+01 |  |  |
| 8111788 | NM_012382    | TTC33        | tetratricopeptide repeat domain 3   | 0.041  | 1.029 | 8.17E-01 | 8.17E+01 |  |  |
| 8111796 | NM_206907    | PRKAA1       | protein kinase, AMP-activated, alp  | -0.032 | 0.978 | 8.38E-01 | 8.38E+01 |  |  |
| 8111812 | ---          | ---          | ---                                 | -0.121 | 0.920 | 4.39E-01 | 4.39E+01 |  |  |
| 8111814 | NM_000997    | RPL37        | ribosomal protein L37               | 0.064  | 1.045 | 5.86E-01 | 5.86E+01 |  |  |
| 8111892 | NM_000436    | OXCT1        | 3-oxoacid CoA transferase 1         | -0.128 | 0.915 | 3.70E-01 | 3.70E+01 |  |  |
| 8111913 | ---          | ---          | ---                                 | 0.046  | 1.033 | 8.15E-01 | 8.15E+01 |  |  |
| 8111925 | NM_00101427  | C5orf39      | chromosome 5 open reading fram      | -0.050 | 0.966 | 8.34E-01 | 8.34E+01 |  |  |
| 8111930 | AK075204     | hCG_2039148  | hypothetical protein LOC1001323     | -0.035 | 0.976 | 9.12E-01 | 9.12E+01 |  |  |
| 8111941 | NM_00109827  | HMGCS1       | 3-hydroxy-3-methylglutaryl-Coenz    | -0.065 | 0.956 | 7.50E-01 | 7.50E+01 |  |  |
| 8111974 | NM_006451    | PAIP1        | poly(A) binding protein interacti   | 0.053  | 1.037 | 6.38E-01 | 6.38E+01 |  |  |
| 8111989 | ---          | ---          | ---                                 | -0.026 | 0.982 | 9.05E-01 | 9.05E+01 |  |  |
| 8112007 | NM_198449    | EMB          | embigin homolog (mouse)             | -0.073 | 0.951 | 6.78E-01 | 6.78E+01 |  |  |
| 8112020 | NM_176806    | MOCS2        | molybdenum cofactor synthesis 2     | 0.000  | 1.000 | 1.00E+00 | 1.00E+02 |  |  |
| 8112033 | NM_019087    | ARL15        | ADP-ribosylation factor-like 15     | 0.225  | 1.169 | 2.32E-01 | 2.32E+01 |  |  |
| 8112041 | ---          | ---          | ---                                 | -0.021 | 0.986 | 9.49E-01 | 9.49E+01 |  |  |
| 8112043 | ---          | ---          | ---                                 | 0.164  | 1.121 | 4.21E-01 | 4.21E+01 |  |  |
| 8112070 | ---          | ---          | ---                                 | 0.135  | 1.098 | 3.62E-01 | 3.62E+01 |  |  |
| 8112072 | NM_021147    | CCNO         | cyclin O                            | -0.125 | 0.917 | 1.47E-01 | 1.47E+01 |  |  |
| 8112081 | NM_019030    | DHX29        | DEAH (Asp-Glu-Ala-His) box polyp    | 0.011  | 1.008 | 9.53E-01 | 9.53E+01 |  |  |
| 8112139 | NM_002184    | IL6ST        | interleukin 6 signal transducer (gp | 0.086  | 1.062 | 7.31E-01 | 7.31E+01 |  |  |
| 8112174 | ---          | ---          | ---                                 | -0.177 | 0.884 | 1.93E-02 | 1.93E+00 |  |  |
| 8112176 | NR_023344    | /// RNU6ATAC | RNA, U6atac small nuclear (U12-d    | -0.208 | 0.866 | 3.10E-01 | 3.10E+01 |  |  |
| 8112180 | ---          | ---          | ---                                 | 0.030  | 1.021 | 8.55E-01 | 8.55E+01 |  |  |
| 8112182 | NM_152622    | MIER3        | mesoderm induction early respon     | -0.067 | 0.955 | 6.54E-01 | 6.54E+01 |  |  |
| 8112220 | NM_00110463  | PDE4D        | phosphodiesterase 4D, cAMP-spe      | -0.169 | 0.889 | 1.19E-01 | 1.19E+01 |  |  |
| 8112274 | NM_024930    | ELOVL7       | ELOVL family member 7, elongatio    | -0.601 | 0.659 | 1.01E-01 | 1.01E+01 |  |  |
| 8112302 | NM_00104824  | C5orf43      | chromosome 5 open reading fram      | 0.173  | 1.127 | 3.63E-02 | 3.63E+00 |  |  |
| 8112312 | NM_014473    | DIMT1L       | DIM1 dimethyladenosine transfer     | -0.051 | 0.965 | 7.71E-01 | 7.71E+01 |  |  |
| 8112327 | NM_001826    | CKS1B        | CDK28 protein kinase regulatory s   | 0.176  | 1.130 | 5.76E-01 | 5.76E+01 |  |  |
| 8112331 | NM_030940    | ISCA1        | iron-sulfur cluster assembly 1 hom  | 0.009  | 1.006 | 9.78E-01 | 9.78E+01 |  |  |
| 8112335 | ---          | ---          | ---                                 | 0.128  | 1.093 | 3.56E-01 | 3.56E+01 |  |  |

|         |              |             |                                      |        |       |          |          |  |  |
|---------|--------------|-------------|--------------------------------------|--------|-------|----------|----------|--|--|
| 8112342 | NM_197941    | ADAMTS6     | ADAM metallopeptidase with thr       | 0.013  | 1.009 | 9.61E-01 | 9.61E+01 |  |  |
| 8112376 | NM_022145    | CENPK       | centromere protein K                 | 0.145  | 1.106 | 8.64E-01 | 8.64E+01 |  |  |
| 8112388 | NM_001656    | TRIM23      | tripartite motif-containing 23       | -0.021 | 0.986 | 9.30E-01 | 9.30E+01 |  |  |
| 8112433 | ---          | ---         | ---                                  | 0.028  | 1.019 | 8.07E-01 | 8.07E+01 |  |  |
| 8112435 | ---          | ---         | ---                                  | -0.039 | 0.974 | 6.87E-01 | 6.87E+01 |  |  |
| 8112439 | NM_176816    | CCDC125     | coiled-coil domain containing 125    | 0.071  | 1.050 | 7.17E-01 | 7.17E+01 |  |  |
| 8112458 | NM_003187    | TAF9        | TAF9 RNA polymerase II, TATA box     | 0.046  | 1.033 | 7.04E-01 | 7.04E+01 |  |  |
| 8112469 | BC171739     | GUSBL1      | glucuronidase, beta-like 1           | -0.002 | 0.999 | 9.96E-01 | 9.96E+01 |  |  |
| 8112476 | ---          | ---         | ---                                  | 0.137  | 1.099 | 4.82E-01 | 4.82E+01 |  |  |
| 8112478 | NM_004536    | NAIP        | NLR family, apoptosis inhibitory pr  | 0.455  | 1.371 | 8.71E-02 | 8.71E+00 |  |  |
| 8112491 | AK289851     | SMA5        | glucuronidase, beta pseudogene       | -0.023 | 0.984 | 9.53E-01 | 9.53E+01 |  |  |
| 8112519 | ---          | ---         | ---                                  | 0.126  | 1.091 | 3.91E-01 | 3.91E+01 |  |  |
| 8112521 | NM_004536    | NAIP        | NLR family, apoptosis inhibitory pr  | 0.462  | 1.377 | 7.90E-02 | 7.90E+00 |  |  |
| 8112538 | NM_001515    | GTF2H2      | general transcription factor IIH, po | 0.084  | 1.060 | 6.91E-01 | 6.91E+01 |  |  |
| 8112558 | NR_003504    | GUSBL1      | glucuronidase, beta-like 1           | 0.019  | 1.013 | 9.61E-01 | 9.61E+01 |  |  |
| 8112560 | AK289851     | SMA5        | glucuronidase, beta pseudogene       | -0.005 | 0.996 | 9.88E-01 | 9.88E+01 |  |  |
| 8112564 | BC171739     | GUSBL1      | glucuronidase, beta-like 1           | -0.005 | 0.997 | 9.88E-01 | 9.88E+01 |  |  |
| 8112570 | NM_015084    | MRPS27      | mitochondrial ribosomal protein S    | 0.020  | 1.014 | 9.21E-01 | 9.21E+01 |  |  |
| 8112584 | NM_152625    | ZNF366      | zinc finger protein 366              | -0.196 | 0.873 | 6.90E-02 | 6.90E+00 |  |  |
| 8112596 | NM_023039    | ANKRA2      | ankyrin repeat, family A (RFXANK-    | 0.004  | 1.003 | 9.90E-01 | 9.90E+01 |  |  |
| 8112607 | ---          | ---         | ---                                  | 0.112  | 1.081 | 8.73E-01 | 8.73E+01 |  |  |
| 8112613 | ---          | ---         | ---                                  | -0.021 | 0.986 | 9.24E-01 | 9.24E+01 |  |  |
| 8112622 | NM_032380    | GFM2        | G elongation factor, mitochondria    | -0.013 | 0.991 | 9.61E-01 | 9.61E+01 |  |  |
| 8112666 | ---          | ---         | ---                                  | 0.064  | 1.045 | 8.12E-01 | 8.12E+01 |  |  |
| 8112687 | NM_005713    | COL4A3BP    | collagen, type IV, alpha 3 (Goodpa   | 0.046  | 1.033 | 7.72E-01 | 7.72E+01 |  |  |
| 8112709 | NM_00109927  | C5orf37     | chromosome 5 open reading fram       | 0.155  | 1.113 | 3.16E-01 | 3.16E+01 |  |  |
| 8112724 | ---          | ---         | ---                                  | 0.088  | 1.063 | 6.00E-01 | 6.00E+01 |  |  |
| 8112728 | NM_00108970  | hCG_1757335 | RAP1B, member of RAS oncogene        | 0.086  | 1.061 | 4.01E-01 | 4.01E+01 |  |  |
| 8112731 | NM_004101    | F2RL2       | coagulation factor II (thrombin) re  | 0.156  | 1.114 | 4.84E-01 | 4.84E+01 |  |  |
| 8112738 | ---          | ---         | ---                                  | -0.020 | 0.986 | 9.44E-01 | 9.44E+01 |  |  |
| 8112740 | NM_032367    | ZBED3       | zinc finger, BED-type containing 3   | 0.040  | 1.028 | 7.12E-01 | 7.12E+01 |  |  |
| 8112746 | NM_018268    | WDR41       | WD repeat domain 41                  | 0.275  | 1.210 | 3.86E-02 | 3.86E+00 |  |  |
| 8112767 | NM_004607    | TBCA        | tubulin folding cofactor A           | -0.007 | 0.995 | 9.72E-01 | 9.72E+01 |  |  |
| 8112772 | NM_003664    | AP3B1       | adaptor-related protein complex 3    | 0.057  | 1.041 | 7.53E-01 | 7.53E+01 |  |  |
| 8112803 | NM_005779    | LHFPL2      | lipoma HMGIC fusion partner-like     | 0.316  | 1.245 | 5.45E-02 | 5.45E+00 |  |  |
| 8112807 | NM_000046    | ARSB        | arylsulfatase B                      | 0.219  | 1.164 | 1.69E-01 | 1.69E+01 |  |  |
| 8112857 | NM_00101089  | MTX3        | metaxin 3                            | -0.089 | 0.940 | 7.84E-01 | 7.84E+01 |  |  |
| 8112865 | NM_178276    | SERINC5     | serine incorporator 5                | 0.165  | 1.121 | 4.96E-01 | 4.96E+01 |  |  |
| 8112881 | ---          | ---         | ---                                  | 0.176  | 1.129 | 7.76E-01 | 7.76E+01 |  |  |
| 8112883 | NR_004845    | LOC644936   | cytoplasmic beta-actin pseudogen     | 0.007  | 1.005 | 9.73E-01 | 9.73E+01 |  |  |
| 8112890 | NM_004269    | MED27       | mediator complex subunit 27          | -0.020 | 0.986 | 9.64E-01 | 9.64E+01 |  |  |
| 8112892 | ---          | ---         | ---                                  | -0.009 | 0.994 | 9.65E-01 | 9.65E+01 |  |  |
| 8112894 | ---          | ---         | ---                                  | 0.185  | 1.137 | 3.02E-01 | 3.02E+01 |  |  |
| 8112914 | ---          | ---         | ---                                  | -0.089 | 0.940 | 6.11E-01 | 6.11E+01 |  |  |
| 8112916 | ---          | ---         | ---                                  | 0.047  | 1.033 | 2.94E-01 | 2.94E+01 |  |  |
| 8112918 | ---          | ---         | ---                                  | -0.073 | 0.951 | 5.61E-01 | 5.61E+01 |  |  |
| 8112940 | NM_012446    | SSBP2       | single-stranded DNA binding prote    | 0.048  | 1.034 | 8.41E-01 | 8.41E+01 |  |  |
| 8112959 | ---          | ---         | ---                                  | -0.012 | 0.991 | 9.63E-01 | 9.63E+01 |  |  |
| 8112961 | NM_001025    | RPS23       | ribosomal protein S23                | -0.026 | 0.982 | 9.00E-01 | 9.00E+01 |  |  |
| 8112967 | NM_174909    | TMEM167A    | transmembrane protein 167A           | 0.211  | 1.158 | 1.26E-01 | 1.26E+01 |  |  |
| 8112994 | ---          | ---         | ---                                  | -0.011 | 0.993 | 9.83E-01 | 9.83E+01 |  |  |
| 8113006 | ---          | ---         | ---                                  | 0.043  | 1.030 | 8.78E-01 | 8.78E+01 |  |  |
| 8113008 | ---          | ---         | ---                                  | 0.168  | 1.124 | 5.41E-01 | 5.41E+01 |  |  |
| 8113010 | NM_001239    | CCNH        | cyclin H                             | -0.008 | 0.995 | 9.76E-01 | 9.76E+01 |  |  |
| 8113023 | NM_153354    | TMEM161B    | transmembrane protein 161B           | 0.026  | 1.018 | 8.97E-01 | 8.97E+01 |  |  |
| 8113035 | ---          | ---         | ---                                  | 0.156  | 1.114 | 2.87E-01 | 2.87E+01 |  |  |
| 8113039 | NM_002397    | MEF2C       | myocyte enhancer factor 2C           | 0.350  | 1.274 | 9.71E-02 | 9.71E+00 |  |  |
| 8113050 | NM_004365    | CETN3       | centrin, EF-hand protein, 3 (CDC3)   | 0.003  | 1.002 | 9.89E-01 | 9.89E+01 |  |  |
| 8113059 | NM_203406    | MBLAC2      | metallo-beta-lactamase domain co     | 0.097  | 1.069 | 5.22E-01 | 5.22E+01 |  |  |
| 8113064 | NM_198273    | LYSMD3      | LysM, putative peptidoglycan-bind    | 0.035  | 1.025 | 8.41E-01 | 8.41E+01 |  |  |
| 8113071 | ENST00000440 | LOC729040   | hypothetical LOC729040               | -0.053 | 0.964 | 6.64E-01 | 6.64E+01 |  |  |
| 8113073 | NM_020801    | ARRDC3      | arrestin domain containing 3         | -0.246 | 0.843 | 3.52E-01 | 3.52E+01 |  |  |
| 8113083 | NM_032042    | FAM172A     | family with sequence similarity 17   | 0.101  | 1.072 | 4.13E-01 | 4.13E+01 |  |  |
| 8113094 | NM_153216    | POU5F2      | POU domain class 5, transcription    | -0.094 | 0.937 | 2.78E-01 | 2.78E+01 |  |  |
| 8113097 | NM_00114567  | C5orf36     | chromosome 5 open reading fram       | 0.241  | 1.182 | 3.99E-01 | 3.99E+01 |  |  |
| 8113120 | BC028919     | TOB2        | transducer of ERBB2, 2               | 0.012  | 1.009 | 9.06E-01 | 9.06E+01 |  |  |
| 8113124 | NM_032290    | ANKRD32     | ankyrin repeat domain 32             | -0.001 | 0.999 | 9.98E-01 | 9.98E+01 |  |  |
| 8113130 | NM_024717    | MCTP1       | multiple C2 domains, transmembr      | 0.448  | 1.364 | 1.76E-01 | 1.76E+01 |  |  |
| 8113157 | NM_014639    | TTC37       | tetratricopeptide repeat domain 3    | 0.028  | 1.019 | 8.79E-01 | 8.79E+01 |  |  |
| 8113214 | NM_002064    | GLRX        | glutaredoxin (thioltransferase)      | 0.005  | 1.004 | 9.89E-01 | 9.89E+01 |  |  |
| 8113220 | NM_012081    | ELL2        | elongation factor, RNA polymeras     | -0.082 | 0.945 | 7.52E-01 | 7.52E+01 |  |  |
| 8113250 | NM_00104045  | ERAP1       | endoplasmic reticulum aminopept      | 0.183  | 1.135 | 1.48E-02 | 1.48E+00 |  |  |
| 8113274 | ---          | ---         | ---                                  | -0.028 | 0.981 | 9.67E-01 | 9.67E+01 |  |  |
| 8113305 | NM_001270    | CHD1        | chromodomain helicase DNA bind       | -0.035 | 0.976 | 8.42E-01 | 8.42E+01 |  |  |
| 8113344 | ---          | ---         | ---                                  | 0.369  | 1.291 | 3.44E-01 | 3.44E+01 |  |  |
| 8113348 | ---          | ---         | ---                                  | 0.052  | 1.036 | 7.97E-01 | 7.97E+01 |  |  |
| 8113358 | NM_005668    | ST8SIA4     | ST8 alpha-N-acetyl-neuraminide a     | 0.314  | 1.243 | 3.15E-02 | 3.15E+00 |  |  |

|         |              |            |                                      |        |       |          |          |  |  |
|---------|--------------|------------|--------------------------------------|--------|-------|----------|----------|--|--|
| 8113369 | NM_180991    | SLCO4C1    | solute carrier organic anion transp  | 0.246  | 1.186 | 4.19E-01 | 4.19E+01 |  |  |
| 8113421 | ---          | ---        | ---                                  | 0.094  | 1.068 | 5.38E-01 | 5.38E+01 |  |  |
| 8113443 | ---          | ---        | ---                                  | -0.028 | 0.981 | 8.46E-01 | 8.46E+01 |  |  |
| 8113445 | BC126144     | FBXL17     | F-box and leucine-rich repeat prot   | 0.017  | 1.012 | 9.27E-01 | 9.27E+01 |  |  |
| 8113467 | ---          | ---        | ---                                  | -0.062 | 0.958 | 6.95E-01 | 6.95E+01 |  |  |
| 8113469 | NM_014819    | PJA2       | praja ring finger 2                  | 0.080  | 1.057 | 4.05E-01 | 4.05E+01 |  |  |
| 8113489 | ---          | ---        | ---                                  | 0.089  | 1.064 | 4.67E-01 | 4.67E+01 |  |  |
| 8113491 | NM_139164    | STARD4     | StAR-related lipid transfer (START   | 0.105  | 1.076 | 5.22E-01 | 5.22E+01 |  |  |
| 8113502 | ---          | ---        | ---                                  | 0.030  | 1.021 | 8.78E-01 | 8.78E+01 |  |  |
| 8113504 | NM_004772    | C5orf13    | chromosome 5 open reading fram       | 0.081  | 1.058 | 7.14E-01 | 7.14E+01 |  |  |
| 8113542 | NM_005669    | REEP5      | receptor accessory protein 5         | 0.062  | 1.044 | 7.04E-01 | 7.04E+01 |  |  |
| 8113551 | NM_00108537  | MCC        | mutated in colorectal cancers        | 0.098  | 1.071 | 4.25E-01 | 4.25E+01 |  |  |
| 8113573 | NM_032028    | TSSK1B     | testis-specific serine kinase 1B     | -0.024 | 0.984 | 8.32E-01 | 8.32E+01 |  |  |
| 8113591 | NM_005023    | PGGT1B     | protein geranylgeranyltransferase    | 0.268  | 1.204 | 4.35E-03 | 4.35E-01 |  |  |
| 8113616 | NM_020177    | FEM1C      | fem-1 homolog c (C. elegans)         | 0.057  | 1.040 | 5.41E-01 | 5.41E+01 |  |  |
| 8113623 | NM_021649    | TICAM2     | toll-like receptor adaptor molecu    | 0.231  | 1.173 | 3.21E-02 | 3.21E+00 |  |  |
| 8113651 | NM_004707    | ATG12      | ATG12 autophagy related 12 hom       | 0.041  | 1.029 | 8.49E-01 | 8.49E+01 |  |  |
| 8113658 | AK291655     | LVRN       | laeverin                             | 0.001  | 1.001 | 9.97E-01 | 9.97E+01 |  |  |
| 8113660 | ---          | ---        | ---                                  | -0.026 | 0.982 | 8.76E-01 | 8.76E+01 |  |  |
| 8113699 | ---          | ---        | ---                                  | 0.018  | 1.012 | 9.61E-01 | 9.61E+01 |  |  |
| 8113701 | ---          | ---        | ---                                  | 0.194  | 1.144 | 3.95E-01 | 3.95E+01 |  |  |
| 8113724 | ---          | ---        | ---                                  | 0.126  | 1.091 | 6.73E-01 | 6.73E+01 |  |  |
| 8113733 | NM_153223    | CEP120     | centrosomal protein 120kDa           | -0.034 | 0.977 | 8.27E-01 | 8.27E+01 |  |  |
| 8113761 | NM_020747    | ZNF608     | zinc finger protein 608              | 0.008  | 1.006 | 9.81E-01 | 9.81E+01 |  |  |
| 8113784 | ---          | ---        | ---                                  | -0.014 | 0.990 | 9.37E-01 | 9.37E+01 |  |  |
| 8113790 | NM_178450    | 40240      | membrane-associated ring finger      | -0.044 | 0.970 | 8.50E-01 | 8.50E+01 |  |  |
| 8113873 | NM_005340    | HINT1      | histidine triad nucleotide binding   | -0.143 | 0.905 | 6.30E-02 | 6.30E+00 |  |  |
| 8113879 | ---          | ---        | ---                                  | 0.111  | 1.080 | 4.86E-01 | 4.86E+01 |  |  |
| 8113881 | NM_016340    | RAPGEF6    | Rap guanine nucleotide exchange      | 0.068  | 1.048 | 7.42E-01 | 7.42E+01 |  |  |
| 8113914 | NM_133372    | FNIP1      | folliculin interacting protein 1     | 0.092  | 1.066 | 6.68E-01 | 6.68E+01 |  |  |
| 8113938 | NM_015256    | ACSL6      | acyl-CoA synthetase long-chain fa    | 0.144  | 1.105 | 1.54E-01 | 1.54E+01 |  |  |
| 8113981 | NM_004199    | P4HA2      | prolyl 4-hydroxylase, alpha polype   | -0.029 | 0.980 | 8.54E-01 | 8.54E+01 |  |  |
| 8114002 | ENST00000416 | P4HA2      | prolyl 4-hydroxylase, alpha polype   | -0.002 | 0.999 | 9.96E-01 | 9.96E+01 |  |  |
| 8114010 | NM_002198    | IRF1       | interferon regulatory factor 1       | 0.053  | 1.038 | 8.23E-01 | 8.23E+01 |  |  |
| 8114030 | NM_007054    | KIF3A      | kinesin family member 3A             | -0.307 | 0.808 | 8.89E-03 | 8.89E-01 |  |  |
| 8114050 | NM_015146    | 40429      | septin 8                             | 0.012  | 1.009 | 9.52E-01 | 9.52E+01 |  |  |
| 8114068 | NM_133456    | SHROOM1    | shroom family member 1               | -0.003 | 0.998 | 9.85E-01 | 9.85E+01 |  |  |
| 8114083 | NM_014423    | AFF4       | AF4/FMR2 family, member 4            | 0.017  | 1.012 | 9.05E-01 | 9.05E+01 |  |  |
| 8114111 | ---          | ---        | ---                                  | 0.000  | 1.000 | 1.00E+00 | 1.00E+02 |  |  |
| 8114113 | NM_017665    | ZCCHC10    | zinc finger, CCHC domain containi    | 0.113  | 1.082 | 3.93E-01 | 3.93E+01 |  |  |
| 8114138 | NM_020199    | C5orf15    | chromosome 5 open reading fram       | 0.037  | 1.026 | 8.33E-01 | 8.33E+01 |  |  |
| 8114145 | NM_003374    | VDAC1      | voltage-dependent anion channel      | -0.038 | 0.974 | 7.87E-01 | 7.87E+01 |  |  |
| 8114152 | NM_006930    | SKP1       | S-phase kinase-associated protein    | -0.127 | 0.916 | 2.23E-01 | 2.23E+01 |  |  |
| 8114158 | NM_002715    | PPP2CA     | protein phosphatase 2 (formerly 2    | -0.020 | 0.986 | 8.73E-01 | 8.73E+01 |  |  |
| 8114185 | NM_080656    | CDKN2AIPNL | CDKN2A interacting protein N-ter     | -0.062 | 0.958 | 7.48E-01 | 7.48E+01 |  |  |
| 8114193 | NM_00103350  | SAR1B      | SAR1 homolog B (S. cerevisiae)       | 0.114  | 1.083 | 4.44E-01 | 4.44E+01 |  |  |
| 8114207 | ---          | ---        | ---                                  | 0.369  | 1.291 | 3.44E-01 | 3.44E+01 |  |  |
| 8114209 | ---          | ---        | ---                                  | 0.150  | 1.109 | 6.95E-01 | 6.95E+01 |  |  |
| 8114211 | ---          | ---        | ---                                  | 0.235  | 1.177 | 6.66E-01 | 6.66E+01 |  |  |
| 8114213 | ---          | ---        | ---                                  | -0.046 | 0.968 | 9.14E-01 | 9.14E+01 |  |  |
| 8114215 | NM_002653    | PITX1      | paired-like homeodomain 1            | -0.083 | 0.944 | 3.11E-01 | 3.11E+01 |  |  |
| 8114239 | NM_130848    | C5orf20    | chromosome 5 open reading fram       | 0.088  | 1.063 | 2.35E-01 | 2.35E+01 |  |  |
| 8114245 | NM_006161    | NEUROG1    | neurogenin 1                         | -0.032 | 0.978 | 7.89E-01 | 7.89E+01 |  |  |
| 8114287 | NM_004598    | SPOCK1     | sparc/osteonectin, cwcv and kazal    | -0.051 | 0.965 | 7.09E-01 | 7.09E+01 |  |  |
| 8114300 | NM_017415    | KLHL3      | kelch-like 3 (Drosophila)            | 0.019  | 1.013 | 9.50E-01 | 9.50E+01 |  |  |
| 8114320 | NM_006805    | HNRNPA0    | heterogeneous nuclear ribonucleo     | -0.004 | 0.997 | 9.77E-01 | 9.77E+01 |  |  |
| 8114326 | NM_016603    | FAM13B     | family with sequence similarity 13   | 0.014  | 1.009 | 9.50E-01 | 9.50E+01 |  |  |
| 8114363 | ---          | ---        | ---                                  | -0.099 | 0.934 | 8.70E-01 | 8.70E+01 |  |  |
| 8114365 | NM_139199    | BRD8       | bromodomain containing 8             | -0.102 | 0.932 | 3.39E-01 | 3.39E+01 |  |  |
| 8114396 | NM_004661    | CDC23      | cell division cycle 23 homolog (S. c | 0.017  | 1.012 | 9.53E-01 | 9.53E+01 |  |  |
| 8114443 | NM_004730    | ETF1       | eukaryotic translation termination   | 0.066  | 1.047 | 5.01E-01 | 5.01E+01 |  |  |
| 8114455 | NM_004134    | HSPA9      | heat shock 70kDa protein 9 (mort     | -0.023 | 0.984 | 8.86E-01 | 8.86E+01 |  |  |
| 8114468 | NR_002913    | SNORD63    | small nucleolar RNA, C/D box 63      | -0.050 | 0.966 | 9.06E-01 | 9.06E+01 |  |  |
| 8114476 | NM_00103763  | SIL1       | SIL1 homolog, endoplasmic reticul    | 0.135  | 1.098 | 2.78E-01 | 2.78E+01 |  |  |
| 8114489 | ---          | ---        | ---                                  | 0.141  | 1.102 | 5.97E-01 | 5.97E+01 |  |  |
| 8114491 | NM_005847    | SLC23A1    | solute carrier family 23 (nucleobas  | -0.012 | 0.992 | 9.27E-01 | 9.27E+01 |  |  |
| 8114511 | NM_016459    | MGC29506   | hypothetical protein MGC29506        | 0.079  | 1.056 | 5.06E-01 | 5.06E+01 |  |  |
| 8114518 | NM_194296    | LOC202051  | hypothetical protein LOC202051       | 0.003  | 1.002 | 9.88E-01 | 9.88E+01 |  |  |
| 8114526 | NM_152686    | DNAJC18    | DnaJ (Hsp40) homolog, subfamily      | -0.110 | 0.927 | 4.56E-01 | 4.56E+01 |  |  |
| 8114536 | NM_198282    | TMEM173    | transmembrane protein 173            | 0.109  | 1.078 | 2.04E-01 | 2.04E+01 |  |  |
| 8114546 | ---          | ---        | ---                                  | -0.139 | 0.908 | 1.26E-01 | 1.26E+01 |  |  |
| 8114550 | NM_004883    | NRG2       | neuregulin 2                         | -0.025 | 0.983 | 8.25E-01 | 8.25E+01 |  |  |
| 8114567 | NM_002622    | PFDN1      | prefoldin subunit 1                  | 0.056  | 1.040 | 7.87E-01 | 7.87E+01 |  |  |
| 8114583 | NM_00103523  | SRA1       | steroid receptor RNA activator 1     | -0.075 | 0.949 | 6.60E-01 | 6.60E+01 |  |  |
| 8114593 | NM_133174    | APBB3      | amyloid beta (A4) precursor prote    | -0.080 | 0.946 | 3.69E-01 | 3.69E+01 |  |  |
| 8114612 | NM_000591    | CD14       | CD14 molecule                        | -0.513 | 0.701 | 2.81E-01 | 2.81E+01 |  |  |
| 8114618 | NM_002488    | NDUFA2     | NADH dehydrogenase (ubiquinone       | 0.020  | 1.014 | 9.53E-01 | 9.53E+01 |  |  |

|         |              |              |                                                                |        |       |          |          |  |
|---------|--------------|--------------|----------------------------------------------------------------|--------|-------|----------|----------|--|
| 8114625 | NM_194249    | DND1         | dead end homolog 1 (zebrafish)                                 | -0.054 | 0.964 | 8.07E-01 | 8.07E+01 |  |
| 8114628 | NM_002109    | HARS         | histidyl-tRNA synthetase                                       | -0.143 | 0.906 | 2.35E-01 | 2.35E+01 |  |
| 8114643 | ---          | ---          | ---                                                            | -0.144 | 0.905 | 1.61E-01 | 1.61E+01 |  |
| 8114645 | ENST00000319 | LOC100288105 | hypothetical protein LOC100288105                              | -0.065 | 0.956 | 7.22E-01 | 7.22E+01 |  |
| 8114647 | NM_031947    | SLC25A2      | solute carrier family 25 (mitochondrial)                       | -0.077 | 0.948 | 7.12E-01 | 7.12E+01 |  |
| 8114653 | NM_005642    | TAF7         | TAF7 RNA polymerase II, TATA box                               | -0.040 | 0.973 | 8.01E-01 | 8.01E+01 |  |
| 8114658 | NM_005219    | DIAPH1       | diaphanous homolog 1 (Drosophila)                              | 0.090  | 1.064 | 1.47E-01 | 1.47E+01 |  |
| 8114691 | NM_003883    | HDAC3        | histone deacetylase 3                                          | 0.055  | 1.039 | 7.08E-01 | 7.08E+01 |  |
| 8114709 | NM_033449    | FCHSD1       | FCH and double SH3 domains 1                                   | -0.031 | 0.979 | 8.41E-01 | 8.41E+01 |  |
| 8114733 | NM_022481    | ARAP3        | ArfGAP with RhoGAP domain, ankyrin                             | 0.018  | 1.013 | 8.86E-01 | 8.86E+01 |  |
| 8114767 | NM_032420    | PCDH1        | protocadherin 1                                                | -0.016 | 0.989 | 9.07E-01 | 9.07E+01 |  |
| 8114778 | NM_004483    | GCSH         | glycine cleavage system protein H                              | -0.010 | 0.993 | 9.75E-01 | 9.75E+01 |  |
| 8114780 | NM_016580    | PCDH12       | protocadherin 12                                               | -0.060 | 0.959 | 6.51E-01 | 6.51E+01 |  |
| 8114787 | NM_005471    | GNPDA1       | glucosamine-6-phosphate deaminase                              | 0.320  | 1.248 | 4.39E-03 | 4.39E-01 |  |
| 8114814 | NM_000176    | NR3C1        | nuclear receptor subfamily 3, group 1                          | -0.295 | 0.815 | 3.25E-04 | 3.25E-02 |  |
| 8114829 | NM_0102494   | YIPF5        | Yip1 domain family, member 5                                   | -0.133 | 0.912 | 2.50E-01 | 2.50E+01 |  |
| 8114856 | BC130586     | PLAC8L1      | PLAC8-like 1                                                   | -0.006 | 0.996 | 9.90E-01 | 9.90E+01 |  |
| 8114861 | NM_020117    | LARS         | leucyl-tRNA synthetase                                         | 0.027  | 1.019 | 8.86E-01 | 8.86E+01 |  |
| 8114900 | NM_004576    | PPP2R2B      | protein phosphatase 2 (formerly 2B)                            | -0.031 | 0.979 | 9.01E-01 | 9.01E+01 |  |
| 8114964 | NM_003122    | SPINK1       | serine peptidase inhibitor, Kazal type 1                       | 0.053  | 1.037 | 9.53E-01 | 9.53E+01 |  |
| 8115014 | NM_014443    | IL17B        | interleukin 17B                                                | -0.001 | 0.999 | 9.95E-01 | 9.95E+01 |  |
| 8115022 | NM_00102510  | CSNK1A1      | casein kinase 1, alpha 1                                       | 0.010  | 1.007 | 9.50E-01 | 9.50E+01 |  |
| 8115074 | ---          | ---          | ---                                                            | 0.100  | 1.072 | 7.42E-01 | 7.42E+01 |  |
| 8115099 | NM_002609    | PDGFRB       | platelet-derived growth factor receptor beta                   | 0.050  | 1.035 | 5.77E-01 | 5.77E+01 |  |
| 8115122 | NM_015981    | CAMK2A       | calcium/calmodulin-dependent protein kinase 2A                 | -0.034 | 0.977 | 7.95E-01 | 7.95E+01 |  |
| 8115144 | NM_00101230  | ARSI         | arylsulfatase family, member I                                 | -0.019 | 0.987 | 9.28E-01 | 9.28E+01 |  |
| 8115158 | NM_00102507  | RPS14        | ribosomal protein S14                                          | -0.003 | 0.998 | 9.88E-01 | 9.88E+01 |  |
| 8115164 | ---          | ---          | ---                                                            | 0.357  | 1.281 | 3.14E-01 | 3.14E+01 |  |
| 8115168 | NM_018047    | RBM22        | RNA binding motif protein 22                                   | 0.002  | 1.001 | 9.96E-01 | 9.96E+01 |  |
| 8115181 | NM_00113564  | DCTN4        | dynactin 4 (p62)                                               | -0.129 | 0.914 | 2.82E-01 | 2.82E+01 |  |
| 8115234 | NM_001155    | ANXA6        | annexin A6                                                     | -0.092 | 0.938 | 4.38E-01 | 4.38E+01 |  |
| 8115261 | NM_015621    | CCDC69       | coiled-coil domain containing 69                               | 0.030  | 1.021 | 8.27E-01 | 8.27E+01 |  |
| 8115327 | NM_003118    | SPARC        | secreted protein, acidic, cysteine-rich                        | -0.009 | 0.993 | 9.77E-01 | 9.77E+01 |  |
| 8115346 | NM_004045    | ATOX1        | ATX1 antioxidant protein 1 homolog                             | 0.244  | 1.184 | 2.35E-01 | 2.35E+01 |  |
| 8115375 | NM_018691    | FAM114A2     | family with sequence similarity 114, member A2                 | -0.020 | 0.986 | 9.49E-01 | 9.49E+01 |  |
| 8115391 | NM_004821    | HAND1        | heart and neural crest derivatives expressed 1                 | -0.066 | 0.955 | 6.03E-01 | 6.03E+01 |  |
| 8115397 | NM_032385    | C5orf4       | chromosome 5 open reading frame 4                              | 0.056  | 1.040 | 5.77E-01 | 5.77E+01 |  |
| 8115410 | NM_015465    | GEMIN5       | gem (nuclear organelle) associated protein 5                   | -0.008 | 0.994 | 9.77E-01 | 9.77E+01 |  |
| 8115476 | NM_004270    | MED7         | mediator complex subunit 7                                     | 0.102  | 1.073 | 5.50E-01 | 5.50E+01 |  |
| 8115487 | NM_00100134  | C5orf40      | chromosome 5 open reading frame 40                             | 0.023  | 1.016 | 9.38E-01 | 9.38E+01 |  |
| 8115524 | NM_014666    | CLINT1       | clathrin interactor 1                                          | 0.009  | 1.006 | 9.56E-01 | 9.56E+01 |  |
| 8115543 | NM_024007    | EBF1         | early B-cell factor 1                                          | -0.114 | 0.924 | 7.23E-01 | 7.23E+01 |  |
| 8115562 | NM_144726    | RNF145       | ring finger protein 145                                        | -0.055 | 0.963 | 7.48E-01 | 7.48E+01 |  |
| 8115580 | NM_052927    | PWWP2A       | PWWP domain containing 2A                                      | -0.031 | 0.979 | 8.15E-01 | 8.15E+01 |  |
| 8115584 | NM_024565    | CCNL1        | cyclin J-like                                                  | 0.028  | 1.020 | 8.44E-01 | 8.44E+01 |  |
| 8115594 | NM_031908    | C1QTNF2      | C1q and tumor necrosis factor receptor 2                       | -0.012 | 0.991 | 9.53E-01 | 9.53E+01 |  |
| 8115606 | NM_006425    | SLU7         | SLU7 splicing factor homolog (S. cerevisiae)                   | 0.034  | 1.024 | 8.40E-01 | 8.40E+01 |  |
| 8115664 | ---          | ---          | ---                                                            | -0.103 | 0.931 | 5.10E-01 | 5.10E+01 |  |
| 8115666 | NM_145266    | NUDCD2       | NudC domain containing 2                                       | -0.026 | 0.982 | 9.10E-01 | 9.10E+01 |  |
| 8115681 | NM_024594    | PANK3        | pantothenate kinase 3                                          | -0.033 | 0.978 | 7.94E-01 | 7.94E+01 |  |
| 8115691 | NM_003062    | SLIT3        | slit homolog 3 (Drosophila)                                    | -0.074 | 0.950 | 2.98E-01 | 2.98E+01 |  |
| 8115732 | AY358216     | UNQ9374      | UCEV9374                                                       | 0.115  | 1.083 | 3.45E-01 | 3.45E+01 |  |
| 8115734 | NM_005565    | LCP2         | lymphocyte cytosolic protein 2 (SH-PTPase)                     | 0.048  | 1.034 | 7.72E-01 | 7.72E+01 |  |
| 8115756 | NM_004137    | KCNMB1       | potassium large conductance calcium-activated channel member 1 | 0.213  | 1.159 | 4.76E-02 | 4.76E+00 |  |
| 8115765 | NM_033644    | FBXW11       | F-box and WD repeat domain containing 11                       | 0.053  | 1.037 | 6.04E-01 | 6.04E+01 |  |
| 8115783 | NM_005990    | STK10        | serine/threonine kinase 10                                     | -0.065 | 0.956 | 6.85E-01 | 6.85E+01 |  |
| 8115806 | NM_152277    | UBTD2        | ubiquitin domain containing 2                                  | -0.083 | 0.944 | 6.78E-01 | 6.78E+01 |  |
| 8115812 | ---          | ---          | ---                                                            | -0.039 | 0.973 | 8.25E-01 | 8.25E+01 |  |
| 8115814 | NM_00101799  | SH3PXD2B     | SH3 and PX domains 2B                                          | -0.280 | 0.824 | 1.72E-01 | 1.72E+01 |  |
| 8115840 | NM_004387    | NKX2-5       | NK2 transcription factor related, like 2                       | -0.005 | 0.996 | 9.73E-01 | 9.73E+01 |  |
| 8115847 | ---          | ---          | ---                                                            | 0.154  | 1.113 | 3.34E-01 | 3.34E+01 |  |
| 8115849 | ---          | ---          | ---                                                            | -0.057 | 0.961 | 5.56E-01 | 5.56E+01 |  |
| 8115865 | NM_138369    | BOD1         | biorientation of chromosomes in division 1                     | -0.018 | 0.987 | 9.16E-01 | 9.16E+01 |  |
| 8115871 | AK131247     | FLJ16171     | FLJ16171 protein                                               | -0.174 | 0.887 | 5.08E-01 | 5.08E+01 |  |
| 8115884 | ---          | ---          | ---                                                            | -0.036 | 0.975 | 8.41E-01 | 8.41E+01 |  |
| 8115886 | NM_032361    | THOC3        | THO complex 3                                                  | -0.001 | 0.999 | 9.96E-01 | 9.96E+01 |  |
| 8115895 | NM_020444    | KIAA1191     | KIAA1191                                                       | -0.105 | 0.930 | 6.00E-01 | 6.00E+01 |  |
| 8115907 | NM_016391    | NOP16        | NOP16 nucleolar protein homolog                                | -0.067 | 0.954 | 8.27E-01 | 8.27E+01 |  |
| 8115918 | NM_007097    | CLTB         | clathrin, light chain (Lcb)                                    | 0.048  | 1.034 | 7.44E-01 | 7.44E+01 |  |
| 8115927 | NM_014901    | RNF44        | ring finger protein 44                                         | 0.011  | 1.008 | 9.56E-01 | 9.56E+01 |  |
| 8115939 | ---          | ---          | ---                                                            | -0.007 | 0.995 | 9.85E-01 | 9.85E+01 |  |
| 8115941 | NM_052899    | GPRIN1       | G protein regulated inducer of neuronal nitric oxide synthase  | 0.003  | 1.002 | 9.86E-01 | 9.86E+01 |  |
| 8115948 | NM_00100150  | SNCB         | synuclein, beta                                                | -0.079 | 0.947 | 4.54E-01 | 4.54E+01 |  |
| 8115978 | NM_016290    | UIMC1        | ubiquitin interaction motif containing 1                       | -0.089 | 0.940 | 4.32E-01 | 4.32E+01 |  |
| 8115997 | NM_00103167  | RAB24        | RAB24, member RAS oncogene family                              | 0.064  | 1.046 | 6.87E-01 | 6.87E+01 |  |
| 8116012 | NM_031300    | MXD3         | MAX dimerization protein 3                                     | 0.008  | 1.006 | 9.50E-01 | 9.50E+01 |  |
| 8116020 | NM_006816    | LMAN2        | lectin, mannose-binding 2                                      | 0.103  | 1.074 | 5.34E-01 | 5.34E+01 |  |

|         |             |                 |                                                                         |        |       |          |          |
|---------|-------------|-----------------|-------------------------------------------------------------------------|--------|-------|----------|----------|
| 8116031 | NM_00102988 | PFN3            | profilin 3                                                              | 0.071  | 1.051 | 5.02E-01 | 5.02E+01 |
| 8116033 | NM_000505   | F12             | coagulation factor XII (Hageman factor)                                 | -0.058 | 0.960 | 4.78E-01 | 4.78E+01 |
| 8116051 | NM_080881   | DBN1            | decorin 1                                                               | -0.039 | 0.973 | 7.35E-01 | 7.35E+01 |
| 8116070 | NM_005451   | PDLIM7          | PDZ and LIM domain 7 (enigma)                                           | -0.036 | 0.976 | 7.78E-01 | 7.78E+01 |
| 8116086 | NM_024872   | DOK3            | docking protein 3                                                       | -0.075 | 0.950 | 6.58E-01 | 6.58E+01 |
| 8116096 | NM_016222   | DDX41           | DEAD (Asp-Glu-Ala-Asp) box polypeptide                                  | -0.003 | 0.998 | 9.88E-01 | 9.88E+01 |
| 8116113 | NR_024019   | FLJ10404        | hypothetical protein FLJ10404                                           | -0.017 | 0.988 | 8.59E-01 | 8.59E+01 |
| 8116128 | NR_026921   | LOC202181       | hypothetical protein LOC202181                                          | 0.008  | 1.006 | 9.77E-01 | 9.77E+01 |
| 8116130 | NM_00107952 | FAM153B         | family with sequence similarity 153                                     | -0.012 | 0.991 | 9.76E-01 | 9.76E+01 |
| 8116162 | NM_006261   | PROP1           | PROP paired-like homeobox 1                                             | -0.012 | 0.991 | 9.44E-01 | 9.44E+01 |
| 8116168 | NM_017838   | NHP2            | NHP2 ribonucleoprotein homolog                                          | 0.000  | 1.000 | 1.00E+00 | 1.00E+02 |
| 8116177 | NM_153373   | AGXT2L2         | alanine-glyoxylate aminotransferase 2-like                              | -0.039 | 0.973 | 7.54E-01 | 7.54E+01 |
| 8116195 | NM_173465   | COL23A1         | collagen, type XXIII, alpha 1                                           | -0.060 | 0.959 | 3.95E-01 | 3.95E+01 |
| 8116227 | NM_020666   | CLK4            | CDC-like kinase 4                                                       | -0.084 | 0.943 | 4.46E-01 | 4.46E+01 |
| 8116245 | ---         | ---             | ---                                                                     | 0.100  | 1.072 | 6.57E-01 | 6.57E+01 |
| 8116253 | NM_000843   | GRM6            | glutamate receptor, metabotropic 6                                      | -0.007 | 0.995 | 9.72E-01 | 9.72E+01 |
| 8116272 | NM_014244   | ADAMT52         | ADAM metalloproteinase with thrombospondin type 1 motifs 52             | 0.017  | 1.012 | 9.16E-01 | 9.16E+01 |
| 8116297 | NM_005520   | HNRNP1          | heterogeneous nuclear ribonucleoprotein 1                               | -0.051 | 0.966 | 5.29E-01 | 5.29E+01 |
| 8116313 | NM_00114230 | LOC285679       | hypothetical protein LOC285679                                          | -0.127 | 0.916 | 3.17E-01 | 3.17E+01 |
| 8116316 | NM_014275   | MGAT4B          | mannosyl (alpha-1,3)-glycosyltransferase 4B                             | -0.093 | 0.938 | 1.65E-01 | 1.65E+01 |
| 8116335 | NM_016175   | C5orf45         | chromosome 5 open reading frame 45                                      | -0.011 | 0.992 | 9.46E-01 | 9.46E+01 |
| 8116346 | ---         | ---             | ---                                                                     | -0.010 | 0.993 | 9.85E-01 | 9.85E+01 |
| 8116348 | NM_198868   | TBC1D9B         | TBC1 domain family, member 9B                                           | 0.007  | 1.005 | 9.77E-01 | 9.77E+01 |
| 8116372 | NM_018434   | RNF130          | ring finger protein 130                                                 | 0.426  | 1.344 | 1.42E-01 | 1.42E+01 |
| 8116384 | NM_175062   | RASGEF1C        | RasGEF domain family, member 1C                                         | 0.004  | 1.002 | 9.83E-01 | 9.83E+01 |
| 8116400 | ---         | ---             | ---                                                                     | -0.029 | 0.980 | 9.36E-01 | 9.36E+01 |
| 8116402 | NM_139068   | MAPK9           | mitogen-activated protein kinase 9                                      | 0.031  | 1.022 | 8.84E-01 | 8.84E+01 |
| 8116418 | NM_005110   | GFPT2           | glutamine-fructose-6-phosphate transaminase 2                           | -0.247 | 0.843 | 2.16E-02 | 2.16E+00 |
| 8116439 | NM_052863   | SCGB3A1         | secretoglobins, family 3A, member 1                                     | -0.050 | 0.966 | 6.35E-01 | 6.35E+01 |
| 8116445 | NM_182925   | FLT4            | fms-related tyrosine kinase 4                                           | 0.049  | 1.034 | 6.35E-01 | 6.35E+01 |
| 8116484 | NM_00111461 | MGAT1           | mannosyl (alpha-1,3)-glycosyltransferase 1                              | 0.182  | 1.134 | 1.80E-01 | 1.80E+01 |
| 8116494 | NM_152283   | ZFP62           | zinc finger protein 62 homolog (mouse)                                  | 0.213  | 1.159 | 3.45E-01 | 3.45E+01 |
| 8116502 | ---         | ---             | ---                                                                     | -0.009 | 0.994 | 9.60E-01 | 9.60E+01 |
| 8116520 | NM_006098   | GNB2L1          | guanine nucleotide binding protein (G20), low molecular weight 2-like 1 | -0.055 | 0.962 | 6.54E-01 | 6.54E+01 |
| 8116530 | NR_002592   | SNORD96A        | small nucleolar RNA, C/D box 96A                                        | 0.008  | 1.006 | 9.82E-01 | 9.82E+01 |
| 8116532 | NR_002591   | SNORD95         | small nucleolar RNA, C/D box 95                                         | 0.026  | 1.018 | 9.56E-01 | 9.56E+01 |
| 8116534 | NM_032765   | TRIM52          | tripartite motif-containing 52                                          | -0.068 | 0.954 | 6.57E-01 | 6.57E+01 |
| 8116548 | NM_020185   | DUSP22          | dual specificity phosphatase 22                                         | 0.022  | 1.015 | 9.27E-01 | 9.27E+01 |
| 8116571 | ---         | ---             | ---                                                                     | 0.122  | 1.089 | 9.23E-01 | 9.23E+01 |
| 8116579 | NM_033260   | FOXQ1           | forkhead box Q1                                                         | 0.012  | 1.009 | 9.50E-01 | 9.50E+01 |
| 8116582 | NM_001452   | FOXF2           | forkhead box F2                                                         | -0.005 | 0.996 | 9.81E-01 | 9.81E+01 |
| 8116585 | ---         | ---             | ---                                                                     | -0.031 | 0.979 | 8.42E-01 | 8.42E+01 |
| 8116591 | NM_001453   | FOXC1           | forkhead box C1                                                         | 0.017  | 1.012 | 8.94E-01 | 8.94E+01 |
| 8116595 | NM_020135   | WRNIP1          | Werner helicase interacting protein 1                                   | -0.088 | 0.941 | 1.01E-01 | 1.01E+01 |
| 8116607 | NR_026855   | DKFZP686I1521   | hypothetical LOC401232                                                  | 0.038  | 1.027 | 7.14E-01 | 7.14E+01 |
| 8116610 | NM_000904   | NQO2            | NAD(P)H dehydrogenase, quinone 2                                        | -0.099 | 0.933 | 5.23E-01 | 5.23E+01 |
| 8116620 | NM_00101298 | 136B // FAM113B | family with sequence similarity 136                                     | 0.036  | 1.025 | 8.53E-01 | 8.53E+01 |
| 8116622 | NM_003804   | RIPK1           | receptor (TNFRSF)-interacting protein kinase 1                          | -0.037 | 0.975 | 7.97E-01 | 7.97E+01 |
| 8116649 | NM_001069   | TUBB2A          | tubulin, beta 2A                                                        | -0.314 | 0.804 | 5.15E-02 | 5.15E+00 |
| 8116651 | ---         | ---             | ---                                                                     | -0.141 | 0.907 | 6.54E-01 | 6.54E+01 |
| 8116653 | NM_001069   | TUBB2A          | tubulin, beta 2A                                                        | -0.314 | 0.804 | 5.15E-02 | 5.15E+00 |
| 8116655 | NM_00112859 | PSMG4           | proteasome (prosome, macropain) subunit type 4, propeptide              | 0.009  | 1.006 | 9.75E-01 | 9.75E+01 |
| 8116658 | NM_012135   | FAM50B          | family with sequence similarity 50                                      | -0.025 | 0.983 | 8.78E-01 | 8.78E+01 |
| 8116664 | NM_003913   | PRPF4B          | PRP4 pre-mRNA processing factor                                         | 0.024  | 1.017 | 8.63E-01 | 8.63E+01 |
| 8116696 | NM_00108540 | C6orf201        | chromosome 6 open reading frame 201                                     | 0.004  | 1.003 | 9.88E-01 | 9.88E+01 |
| 8116710 | NR_026590   | CDYL            | chromodomain protein, Y-like                                            | -0.060 | 0.960 | 5.11E-01 | 5.11E+01 |
| 8116724 | NM_006567   | FARS2           | phenylalanyl-tRNA synthetase 2, nuclear                                 | 0.043  | 1.030 | 8.77E-01 | 8.77E+01 |
| 8116740 | NM_00100369 | RREB1           | ras responsive element binding protein 1                                | 0.174  | 1.128 | 2.00E-01 | 2.00E+01 |
| 8116760 | NM_031480   | RIOK1           | RIO kinase 1 (yeast)                                                    | -0.068 | 0.954 | 7.64E-01 | 7.64E+01 |
| 8116807 | NM_152551   | SNRNP48         | small nuclear ribonucleoprotein 48                                      | 0.092  | 1.066 | 4.85E-01 | 4.85E+01 |
| 8116818 | NM_001718   | BMP6            | bone morphogenetic protein 6                                            | -0.143 | 0.906 | 7.67E-02 | 7.67E+00 |
| 8116835 | NM_145649   | GCNT2           | glucosaminyl (N-acetyl) transferase 2                                   | 0.269  | 1.205 | 1.59E-01 | 1.59E+01 |
| 8116859 | NM_016462   | TMEM14C         | transmembrane protein 14C                                               | -0.073 | 0.951 | 7.83E-01 | 7.83E+01 |
| 8116867 | NM_030969   | TMEM14B         | transmembrane protein 14B                                               | -0.025 | 0.983 | 9.06E-01 | 9.06E+01 |
| 8116910 | NM_002114   | HIVEP1          | human immunodeficiency virus type 1 enhancer-binding protein 1          | -0.060 | 0.959 | 6.74E-01 | 6.74E+01 |
| 8116921 | NM_001955   | EDN1            | endothelin 1                                                            | 0.024  | 1.017 | 9.53E-01 | 9.53E+01 |
| 8116929 | NM_002948   | RPL15           | ribosomal protein L15                                                   | 0.000  | 1.000 | 1.00E+00 | 1.00E+02 |
| 8116932 | NM_030948   | PHACTR1         | phosphatase and actin regulator 1                                       | -0.148 | 0.903 | 1.41E-01 | 1.41E+01 |
| 8116956 | NM_031244   | SIRT5           | sirtuin (silent mating type information 2) 5                            | 0.034  | 1.023 | 8.47E-01 | 8.47E+01 |
| 8116969 | NM_016167   | NOL7            | nucleolar protein 7, 27kDa                                              | -0.032 | 0.978 | 8.06E-01 | 8.06E+01 |
| 8116983 | NM_004233   | CD83            | CD83 molecule                                                           | -0.137 | 0.909 | 3.66E-01 | 3.66E+01 |
| 8116992 | ---         | ---             | ---                                                                     | -0.007 | 0.995 | 9.88E-01 | 9.88E+01 |
| 8116998 | NM_004973   | JARID2          | jumonji, AT rich interactive domain                                     | -0.051 | 0.966 | 7.86E-01 | 7.86E+01 |
| 8117018 | ---         | ---             | ---                                                                     | -0.260 | 0.835 | 3.49E-01 | 3.49E+01 |
| 8117020 | NM_013262   | MYLIP           | myosin regulatory light chain interacting protein                       | 0.164  | 1.120 | 2.08E-01 | 2.08E+01 |
| 8117034 | NM_006877   | GMPT            | guanosine monophosphate reductase                                       | 0.106  | 1.076 | 4.98E-01 | 4.98E+01 |
| 8117071 | NM_016255   | FAM8A1          | family with sequence similarity 8, member A1                            | 0.131  | 1.095 | 8.15E-02 | 8.15E+00 |



|         |              |              |                                     |        |       |          |          |  |  |
|---------|--------------|--------------|-------------------------------------|--------|-------|----------|----------|--|--|
| 8117081 | NM_153042    | AOF1         | amine oxidase (flavin containing) d | 0.280  | 1.215 | 2.46E-02 | 2.46E+00 |  |  |
| 8117106 | NM_182757    | RNF144B      | ring finger protein 144B            | -0.219 | 0.859 | 5.38E-01 | 5.38E+01 |  |  |
| 8117118 | ---          | ---          | ---                                 | -0.022 | 0.985 | 9.44E-01 | 9.44E+01 |  |  |
| 8117128 | NM_001949    | E2F3         | E2F transcription factor 3          | 0.010  | 1.007 | 9.61E-01 | 9.61E+01 |  |  |
| 8117140 | NM_017774    | CDKAL1       | CDK5 regulatory subunit associate   | 0.006  | 1.004 | 9.80E-01 | 9.80E+01 |  |  |
| 8117165 | NM_003107    | SOX4         | SRY (sex determining region Y)-bo   | -0.074 | 0.950 | 4.25E-01 | 4.25E+01 |  |  |
| 8117172 | NM_138574    | HDGFL1       | hepatoma derived growth factor-l    | -0.034 | 0.977 | 7.67E-01 | 7.67E+01 |  |  |
| 8117176 | ENST00000400 | LOC100129307 | UPF0607 protein ENSP000003831       | 0.035  | 1.025 | 8.62E-01 | 8.62E+01 |  |  |
| 8117187 | ---          | ---          | ---                                 | 0.035  | 1.025 | 8.00E-01 | 8.00E+01 |  |  |
| 8117194 | NM_020662    | MRS2         | MRS2 magnesium homeostasis fa       | 0.170  | 1.125 | 8.33E-02 | 8.33E+00 |  |  |
| 8117207 | NM_170740    | ALDH5A1      | aldehyde dehydrogenase 5 family,    | 0.098  | 1.070 | 3.17E-01 | 3.17E+01 |  |  |
| 8117219 | NM_018473    | ACOT13       | acyl-CoA thioesterase 13            | 0.261  | 1.198 | 6.65E-02 | 6.65E+00 |  |  |
| 8117237 | ---          | ---          | ---                                 | 0.015  | 1.011 | 9.27E-01 | 9.27E+01 |  |  |
| 8117239 | ---          | ---          | ---                                 | -0.004 | 0.997 | 9.86E-01 | 9.86E+01 |  |  |
| 8117243 | NM_017640    | LRRC16A      | leucine rich repeat containing 16A  | 0.201  | 1.150 | 1.45E-01 | 1.45E+01 |  |  |
| 8117321 | NM_006355    | TRIM38       | tripartite motif-containing 38      | 0.144  | 1.105 | 3.20E-01 | 3.20E+01 |  |  |
| 8117330 | NM_003529    | HIST1H3A     | histone cluster 1, H3a              | -0.244 | 0.844 | 8.94E-02 | 8.94E+00 |  |  |
| 8117334 | NM_003538    | HIST1H4A     | histone cluster 1, H4a              | -0.173 | 0.887 | 3.63E-01 | 3.63E+01 |  |  |
| 8117339 | NM_003531    | HIST1H3C     | histone cluster 1, H3c              | 0.011  | 1.008 | 9.49E-01 | 9.49E+01 |  |  |
| 8117368 | NM_003542    | HIST1H4C     | histone cluster 1, H4c              | 0.192  | 1.143 | 4.68E-01 | 4.68E+01 |  |  |
| 8117372 | NM_003512    | HIST1H2AC    | histone cluster 1, H2ac             | 0.060  | 1.043 | 6.26E-01 | 6.26E+01 |  |  |
| 8117377 | NM_005321    | HIST1H1E     | histone cluster 1, H1e              | 0.050  | 1.035 | 7.48E-01 | 7.48E+01 |  |  |
| 8117382 | NM_021063    | HIST1H2BD    | histone cluster 1, H2bd             | -0.085 | 0.943 | 7.03E-01 | 7.03E+01 |  |  |
| 8117395 | NM_003522    | HIST1H2BF    | histone cluster 1, H2bf             | 0.225  | 1.169 | 1.59E-01 | 1.59E+01 |  |  |
| 8117402 | NM_003545    | HIST1H4E     | histone cluster 1, H4e              | 0.189  | 1.140 | 2.36E-01 | 2.36E+01 |  |  |
| 8117408 | NM_021052    | HIST1H2AE    | histone cluster 1, H2ae             | 0.073  | 1.052 | 7.79E-01 | 7.79E+01 |  |  |
| 8117422 | NM_003540    | HIST1H4F     | histone cluster 1, H4f              | 0.206  | 1.153 | 1.76E-01 | 1.76E+01 |  |  |
| 8117426 | NM_003524    | HIST1H2BH    | histone cluster 1, H2bh             | 0.108  | 1.077 | 6.28E-01 | 6.28E+01 |  |  |
| 8117435 | NM_007047    | BTN3A2       | butyrophilin, subfamily 3, member   | -0.062 | 0.958 | 5.94E-01 | 5.94E+01 |  |  |
| 8117447 | NM_006995    | BTN2A2       | butyrophilin, subfamily 2, member   | 0.098  | 1.070 | 1.27E-01 | 1.27E+01 |  |  |
| 8117458 | NM_00114500  | BTN3A1       | butyrophilin, subfamily 3, member   | -0.023 | 0.984 | 9.28E-01 | 9.28E+01 |  |  |
| 8117476 | NM_006994    | BTN3A3       | butyrophilin, subfamily 3, member   | -0.050 | 0.966 | 7.25E-01 | 7.25E+01 |  |  |
| 8117485 | NM_078476    | BTN2A1       | butyrophilin, subfamily 2, member   | -0.047 | 0.968 | 7.44E-01 | 7.44E+01 |  |  |
| 8117510 | NM_006353    | HMGNA4       | high mobility group nucleosomal t   | -0.048 | 0.967 | 5.88E-01 | 5.88E+01 |  |  |
| 8117522 | NM_013375    | ABT1         | activator of basal transcription 1  | 0.101  | 1.073 | 2.73E-01 | 2.73E+01 |  |  |
| 8117531 | ---          | ---          | ---                                 | -0.089 | 0.940 | 5.79E-01 | 5.79E+01 |  |  |
| 8117535 | NM_021064    | HIST1H2AG    | histone cluster 1, H2ag             | -0.108 | 0.928 | 4.57E-01 | 4.57E+01 |  |  |
| 8117537 | NM_003495    | HIST1H4I     | histone cluster 1, H4i              | 0.023  | 1.016 | 9.20E-01 | 9.20E+01 |  |  |
| 8117565 | ---          | ---          | ---                                 | -0.063 | 0.957 | 5.64E-01 | 5.64E+01 |  |  |
| 8117572 | NM_00107678  | ZNF391       | zinc finger protein 391             | -0.038 | 0.974 | 9.06E-01 | 9.06E+01 |  |  |
| 8117580 | NM_003509    | HIST1H2AI    | histone cluster 1, H2ai             | 0.009  | 1.006 | 9.68E-01 | 9.68E+01 |  |  |
| 8117583 | NM_003509    | HIST1H2AI    | histone cluster 1, H2ai             | 0.000  | 1.000 | 1.00E+00 | 1.00E+02 |  |  |
| 8117594 | NM_003521    | HIST1H2BM    | histone cluster 1, H2bm             | 0.233  | 1.176 | 4.41E-01 | 4.41E+01 |  |  |
| 8117608 | NM_003511    | HIST1H2AL    | histone cluster 1, H2al             | 0.011  | 1.008 | 9.65E-01 | 9.65E+01 |  |  |
| 8117614 | NM_003527    | HIST1H2BO    | histone cluster 1, H2bo             | -0.077 | 0.948 | 7.67E-01 | 7.67E+01 |  |  |
| 8117626 | ---          | ---          | ---                                 | 0.086  | 1.061 | 3.44E-01 | 3.44E+01 |  |  |
| 8117628 | ---          | ---          | ---                                 | -0.033 | 0.977 | 9.33E-01 | 9.33E+01 |  |  |
| 8117630 | NM_003447    | ZNF165       | zinc finger protein 165             | -0.237 | 0.848 | 5.21E-02 | 5.21E+00 |  |  |
| 8117646 | NM_006298    | ZNF192       | zinc finger protein 192             | -0.010 | 0.993 | 9.74E-01 | 9.74E+01 |  |  |
| 8117653 | ---          | ---          | ---                                 | -0.116 | 0.923 | 7.16E-01 | 7.16E+01 |  |  |
| 8117655 | NM_006299    | ZNF193       | zinc finger protein 193             | 0.028  | 1.020 | 8.78E-01 | 8.78E+01 |  |  |
| 8117667 | NM_00102356  | ZNF187       | zinc finger protein 187             | -0.010 | 0.993 | 9.61E-01 | 9.61E+01 |  |  |
| 8117685 | NM_024493    | ZKSCAN3      | zinc finger with KRAB and SCAN do   | 0.182  | 1.135 | 2.20E-01 | 2.20E+01 |  |  |
| 8117698 | ---          | ---          | ---                                 | 0.017  | 1.012 | 9.08E-01 | 9.08E+01 |  |  |
| 8117710 | ---          | ---          | ---                                 | -0.046 | 0.969 | 7.51E-01 | 7.51E+01 |  |  |
| 8117720 | ---          | ---          | ---                                 | 0.000  | 1.000 | 1.00E+00 | 1.00E+02 |  |  |
| 8117739 | ---          | ---          | ---                                 | -0.065 | 0.956 | 5.87E-01 | 5.87E+01 |  |  |
| 8117741 | NM_007160    | OR2H2        | olfactory receptor, family 2, subfa | -0.013 | 0.991 | 9.46E-01 | 9.46E+01 |  |  |
| 8117760 | NM_00109847  | HLA-F        | major histocompatibility complex,   | -0.029 | 0.980 | 8.62E-01 | 8.62E+01 |  |  |
| 8117773 | AK128290     | LOC554223    | hypothetical LOC554223              | 0.026  | 1.018 | 8.62E-01 | 8.62E+01 |  |  |
| 8117777 | NM_002127    | HLA-G        | major histocompatibility complex,   | -0.027 | 0.981 | 8.42E-01 | 8.42E+01 |  |  |
| 8117800 | NM_002116    | HLA-A        | major histocompatibility complex,   | -0.021 | 0.986 | 9.40E-01 | 9.40E+01 |  |  |
| 8117813 | NR_024240    | HLA-J        | major histocompatibility complex,   | -0.030 | 0.979 | 8.07E-01 | 8.07E+01 |  |  |
| 8117822 | NM_170783    | ZNRD1        | zinc ribbon domain containing 1     | -0.004 | 0.997 | 9.87E-01 | 9.87E+01 |  |  |
| 8117834 | NM_021959    | PPP1R11      | protein phosphatase 1, regulatory   | 0.021  | 1.015 | 9.35E-01 | 9.35E+01 |  |  |
| 8117840 | NM_138700    | TRIM40       | tripartite motif-containing 40      | 0.004  | 1.003 | 9.86E-01 | 9.86E+01 |  |  |
| 8117849 | NM_033229    | TRIM15       | tripartite motif-containing 15      | 0.029  | 1.020 | 7.47E-01 | 7.47E+01 |  |  |
| 8117861 | NR_027822    | HLA-L        | major histocompatibility complex,   | -0.044 | 0.970 | 8.03E-01 | 8.03E+01 |  |  |
| 8117869 | NM_172016    | TRIM39       | tripartite motif-containing 39      | -0.049 | 0.967 | 7.38E-01 | 7.38E+01 |  |  |
| 8117881 | NM_024839    | RPP21        | ribonuclease P/MRP 21kDa subun      | -0.079 | 0.947 | 6.37E-01 | 6.37E+01 |  |  |
| 8117888 | NM_006325    | RAN          | RAN, member RAS oncogene fami       | -0.081 | 0.945 | 6.33E-01 | 6.33E+01 |  |  |
| 8117890 | NM_005516    | HLA-E        | major histocompatibility complex,   | 0.026  | 1.018 | 8.97E-01 | 8.97E+01 |  |  |
| 8117900 | NM_013993    | DDR1         | discoidin domain receptor tyrosin   | -0.002 | 0.998 | 9.88E-01 | 9.88E+01 |  |  |
| 8117922 | NM_025263    | PRR3         | proline rich 3                      | -0.057 | 0.961 | 7.94E-01 | 7.94E+01 |  |  |
| 8117929 | NM_00102509  | ABCF1        | ATP-binding cassette, sub-family F  | -0.130 | 0.914 | 1.10E-01 | 1.10E+01 |  |  |
| 8117955 | NM_014046    | MRPS18B      | mitochondrial ribosomal protein S   | 0.027  | 1.019 | 9.07E-01 | 9.07E+01 |  |  |
| 8117965 | NM_024909    | C6orf134     | chromosome 6 open reading fram      | -0.122 | 0.919 | 4.09E-01 | 4.09E+01 |  |  |

|         |             |          |                                         |        |       |          |          |  |  |
|---------|-------------|----------|-----------------------------------------|--------|-------|----------|----------|--|--|
| 8117987 | NM_00116137 | C6orf136 | chromosome 6 open reading fram          | -0.070 | 0.952 | 6.07E-01 | 6.07E+01 |  |  |
| 8117995 | NM_178014   | TUBB     | tubulin, beta                           | -0.094 | 0.937 | 7.04E-01 | 7.04E+01 |  |  |
| 8118007 | NM_001517   | GTF2H4   | general transcription factor IIH, po    | 0.015  | 1.010 | 9.27E-01 | 9.27E+01 |  |  |
| 8118023 | NM_001517   | GTF2H4   | general transcription factor IIH, po    | 0.011  | 1.008 | 9.70E-01 | 9.70E+01 |  |  |
| 8118028 | NM_020442   | VAR52    | valyl-tRNA synthetase 2, mitochor       | -0.016 | 0.989 | 9.04E-01 | 9.04E+01 |  |  |
| 8118069 | NM_00101090 | MUC21    | mucin 21, cell surface associated       | -0.063 | 0.957 | 4.87E-01 | 4.87E+01 |  |  |
| 8118086 | NM_007109   | TCF19    | transcription factor 19                 | -0.040 | 0.973 | 8.06E-01 | 8.06E+01 |  |  |
| 8118093 | NR_026791   | HCG27    | HLA complex group 27                    | 0.094  | 1.067 | 2.33E-01 | 2.33E+01 |  |  |
| 8118098 | ---         | ---      | ---                                     | 0.054  | 1.038 | 5.91E-01 | 5.91E+01 |  |  |
| 8118100 | NM_000247   | MICA     | MHC class I polypeptide-related se      | -0.130 | 0.914 | 3.11E-01 | 3.11E+01 |  |  |
| 8118111 | NM_006674   | HCP5     | HLA complex P5                          | -0.035 | 0.976 | 8.98E-01 | 8.98E+01 |  |  |
| 8118116 | NM_005931   | MICB     | MHC class I polypeptide-related se      | 0.031  | 1.021 | 8.92E-01 | 8.92E+01 |  |  |
| 8118124 | NM_00101170 | MCCD1    | mitochondrial coiled-coil domain 1      | 0.049  | 1.035 | 6.58E-01 | 6.58E+01 |  |  |
| 8118127 | NM_005007   | NFKBIL1  | nuclear factor of kappa light polyp     | -0.066 | 0.955 | 5.87E-01 | 5.87E+01 |  |  |
| 8118137 | NM_000595   | LTA      | lymphotoxin alpha (TNF superfam         | -0.063 | 0.957 | 7.54E-01 | 7.54E+01 |  |  |
| 8118142 | NM_000594   | TNF      | tumor necrosis factor (TNF superfa      | -0.138 | 0.909 | 5.35E-01 | 5.35E+01 |  |  |
| 8118147 | ---         | ---      | ---                                     | 0.001  | 1.001 | 9.96E-01 | 9.96E+01 |  |  |
| 8118174 | NM_080686   | BAT2     | HLA-B associated transcript 2           | -0.004 | 0.997 | 9.81E-01 | 9.81E+01 |  |  |
| 8118207 | NR_002971   | SNORA38  | small nucleolar RNA, H/ACA box 38       | -0.099 | 0.934 | 6.38E-01 | 6.38E+01 |  |  |
| 8118209 | NM_019101   | APOM     | apolipoprotein M                        | -0.007 | 0.995 | 9.76E-01 | 9.76E+01 |  |  |
| 8118218 | NM_001320   | CSNK2B   | casein kinase 2, beta polypeptide       | 0.090  | 1.064 | 3.78E-01 | 3.78E+01 |  |  |
| 8118228 | NM_021221   | LY6G5B   | lymphocyte antigen 6 complex, loc       | -0.025 | 0.983 | 9.51E-01 | 9.51E+01 |  |  |
| 8118235 | NM_00100369 | LY6G6F   | lymphocyte antigen 6 complex, loc       | -0.034 | 0.977 | 8.07E-01 | 8.07E+01 |  |  |
| 8118242 | NM_021246   | LY6G6D   | lymphocyte antigen 6 complex, loc       | 0.024  | 1.017 | 8.57E-01 | 8.57E+01 |  |  |
| 8118249 | NM_138277   | C6orf25  | chromosome 6 open reading fram          | -0.058 | 0.961 | 5.89E-01 | 5.89E+01 |  |  |
| 8118259 | NM_025259   | MSH5     | mutS homolog 5 (E. coli)                | 0.120  | 1.087 | 2.74E-01 | 2.74E+01 |  |  |
| 8118302 | BC137541    | C6orf26  | chromosome 6 open reading fram          | -0.033 | 0.978 | 8.01E-01 | 8.01E+01 |  |  |
| 8118310 | NM_005345   | HSPA1A   | heat shock 70kDa protein 1A             | -0.289 | 0.818 | 2.61E-03 | 2.61E-01 |  |  |
| 8118319 | ---         | ---      | ---                                     | 0.208  | 1.155 | 7.45E-01 | 7.45E+01 |  |  |
| 8118322 | NR_002742   | SNORD52  | small nucleolar RNA, C/D box 52         | 0.189  | 1.140 | 3.95E-01 | 3.95E+01 |  |  |
| 8118345 | NM_001710   | CFB      | complement factor B                     | -0.245 | 0.844 | 6.68E-01 | 6.68E+01 |  |  |
| 8118367 | NM_006929   | SKIV2L   | superkiller viralicidic activity 2-like | -0.058 | 0.961 | 6.62E-01 | 6.62E+01 |  |  |
| 8118395 | NR_026717   | STK19    | serine/threonine kinase 19              | -0.028 | 0.981 | 8.96E-01 | 8.96E+01 |  |  |
| 8118498 | NM_000500   | CYP21A2  | cytochrome P450, family 21, subfa       | 0.003  | 1.002 | 9.88E-01 | 9.88E+01 |  |  |
| 8118509 | NM_005155   | PPT2     | palmitoyl-protein thioesterase 2        | -0.035 | 0.976 | 7.51E-01 | 7.51E+01 |  |  |
| 8118535 | NM_006913   | RNF5     | ring finger protein 5                   | -0.032 | 0.978 | 8.54E-01 | 8.54E+01 |  |  |
| 8118544 | ---         | ---      | ---                                     | -0.060 | 0.959 | 6.97E-01 | 6.97E+01 |  |  |
| 8118556 | NM_002122   | HLA-DQA1 | major histocompatibility complex,       | 0.257  | 1.195 | 7.77E-01 | 7.77E+01 |  |  |
| 8118564 | NM_020056   | HLA-DQA2 | major histocompatibility complex,       | 0.237  | 1.178 | 3.39E-01 | 3.39E+01 |  |  |
| 8118571 | NM_002800   | PSMB9    | proteasome (prosome, macropain          | 0.138  | 1.101 | 3.90E-01 | 3.90E+01 |  |  |
| 8118580 | NM_005104   | BRD2     | bromodomain containing 2                | -0.101 | 0.932 | 2.26E-01 | 2.26E+01 |  |  |
| 8118613 | NM_006979   | SLC39A7  | solute carrier family 39 (zinc trans    | -0.066 | 0.955 | 6.81E-01 | 6.81E+01 |  |  |
| 8118622 | NM_014234   | HSD17B8  | hydroxysteroid (17-beta) dehydro        | 0.041  | 1.029 | 8.57E-01 | 8.57E+01 |  |  |
| 8118634 | NM_002931   | RING1    | ring finger protein 1                   | 0.000  | 1.000 | 1.00E+00 | 1.00E+02 |  |  |
| 8118644 | NM_022551   | RPS18    | ribosomal protein S18                   | 0.020  | 1.014 | 9.23E-01 | 9.23E+01 |  |  |
| 8118655 | NM_003782   | B3GALT4  | UDP-Gal:betaGlcNAc beta 1,3-gala        | 0.012  | 1.008 | 9.54E-01 | 9.54E+01 |  |  |
| 8118661 | NM_014260   | PFDN6    | prefoldin subunit 6                     | 0.032  | 1.022 | 8.91E-01 | 8.91E+01 |  |  |
| 8118667 | ---         | ---      | ---                                     | -0.022 | 0.985 | 9.10E-01 | 9.10E+01 |  |  |
| 8118669 | NM_002263   | KIFC1    | kinesin family member C1                | 0.064  | 1.045 | 6.93E-01 | 6.93E+01 |  |  |
| 8118682 | NR_027692   | PHF1     | PHD finger protein 1                    | -0.185 | 0.880 | 5.77E-02 | 5.77E+00 |  |  |
| 8118696 | NM_006772   | SYNGAP1  | synaptic Ras GTPase activating pro      | -0.055 | 0.963 | 6.10E-01 | 6.10E+01 |  |  |
| 8118724 | ---         | ---      | ---                                     | 0.021  | 1.014 | 9.23E-01 | 9.23E+01 |  |  |
| 8118726 | NR_027908   | C6orf227 | chromosome 6 open reading fram          | 0.009  | 1.006 | 9.61E-01 | 9.61E+01 |  |  |
| 8118734 | NM_002224   | ITPR3    | inositol 1,4,5-trisphosphate recept     | -0.075 | 0.949 | 3.90E-01 | 3.90E+01 |  |  |
| 8118794 | NM_145899   | HMGAI    | high mobility group AT-hook 1           | -0.053 | 0.964 | 7.09E-01 | 7.09E+01 |  |  |
| 8118804 | NM_020804   | PACSN1   | protein kinase C and casein kinase      | 0.038  | 1.027 | 7.07E-01 | 7.07E+01 |  |  |
| 8118820 | ---         | ---      | ---                                     | 0.049  | 1.035 | 8.90E-01 | 8.90E+01 |  |  |
| 8118824 | ---         | ---      | ---                                     | 0.047  | 1.033 | 8.16E-01 | 8.16E+01 |  |  |
| 8118826 | NM_003093   | SNRPC    | small nuclear ribonucleoprotein p       | 0.135  | 1.098 | 2.35E-01 | 2.35E+01 |  |  |
| 8118833 | NM_017754   | UHRF1BP1 | UHRF1 binding protein 1                 | 0.208  | 1.155 | 1.55E-01 | 1.55E+01 |  |  |
| 8118861 | ---         | ---      | ---                                     | 0.228  | 1.171 | 1.63E-01 | 1.63E+01 |  |  |
| 8118863 | NM_015245   | ANKS1A   | ankyrin repeat and sterile alpha m      | 0.054  | 1.038 | 7.15E-01 | 7.15E+01 |  |  |
| 8118890 | NM_152753   | SCUBE3   | signal peptide, CUB domain, EGF-I       | -0.046 | 0.968 | 6.66E-01 | 6.66E+01 |  |  |
| 8118915 | NM_003427   | ZNF76    | zinc finger protein 76 (expressed i     | 0.018  | 1.012 | 9.40E-01 | 9.40E+01 |  |  |
| 8118932 | NM_022047   | DEF6     | differentially expressed in FDCP 6      | -0.006 | 0.996 | 9.74E-01 | 9.74E+01 |  |  |
| 8118945 | NM_006238   | PPARD    | peroxisome proliferator-activated       | 0.071  | 1.050 | 6.87E-01 | 6.87E+01 |  |  |
| 8118963 | NM_021922   | FANCE    | Fanconi anemia, complementation         | -0.059 | 0.960 | 6.07E-01 | 6.07E+01 |  |  |
| 8118974 | NM_007104   | RPL10A   | ribosomal protein L10a                  | -0.068 | 0.954 | 6.87E-01 | 6.87E+01 |  |  |
| 8118979 | ---         | ---      | ---                                     | 0.274  | 1.209 | 4.06E-01 | 4.06E+01 |  |  |
| 8118981 | BC033033    | C6orf81  | chromosome 6 open reading fram          | 0.002  | 1.001 | 9.94E-01 | 9.94E+01 |  |  |
| 8118990 | NM_207409   | C6orf126 | chromosome 6 open reading fram          | -0.018 | 0.988 | 9.14E-01 | 9.14E+01 |  |  |
| 8118995 | NM_182548   | LHFPL5   | lipoma HMGIC fusion partner-like        | -0.057 | 0.961 | 6.33E-01 | 6.33E+01 |  |  |
| 8119000 | NM_001315   | MAPK14   | mitogen-activated protein kinase        | -0.069 | 0.954 | 6.63E-01 | 6.63E+01 |  |  |
| 8119016 | NM_002754   | MAPK13   | mitogen-activated protein kinase        | -0.058 | 0.961 | 6.80E-01 | 6.80E+01 |  |  |
| 8119034 | NM_015695   | BRPF3    | bromodomain and PHD finger con          | -0.154 | 0.899 | 2.01E-01 | 2.01E+01 |  |  |
| 8119052 | NM_173676   | PNPLA1   | patatin-like phospholipase domain       | -0.095 | 0.936 | 2.21E-01 | 2.21E+01 |  |  |
| 8119067 | NM_173562   | KCTD20   | potassium channel tetramerisatio        | -0.068 | 0.954 | 7.07E-01 | 7.07E+01 |  |  |

|         |                             |                                                  |                                                                |        |       |          |          |  |  |
|---------|-----------------------------|--------------------------------------------------|----------------------------------------------------------------|--------|-------|----------|----------|--|--|
| 8119076 | ---                         | ---                                              | ---                                                            | 0.168  | 1.123 | 5.25E-01 | 5.25E+01 |  |  |
| 8119078 | ---                         | ---                                              | ---                                                            | 0.066  | 1.047 | 7.54E-01 | 7.54E+01 |  |  |
| 8119080 | NM_003017                   | SFRS3                                            | splicing factor, arginine/serine-rich 3                        | -0.045 | 0.969 | 7.01E-01 | 7.01E+01 |  |  |
| 8119107 | ---                         | ---                                              | ---                                                            | -0.019 | 0.987 | 9.34E-01 | 9.34E+01 |  |  |
| 8119109 | NM_152734                   | C6orf89                                          | chromosome 6 open reading frame 89                             | 0.010  | 1.007 | 9.67E-01 | 9.67E+01 |  |  |
| 8119124 | NM_153370                   | PI16                                             | peptidase inhibitor 16                                         | -0.034 | 0.977 | 7.89E-01 | 7.89E+01 |  |  |
| 8119132 | NM_173558                   | FGD2                                             | FYVE, RhoGEF and PH domain containing 2                        | 0.229  | 1.172 | 5.92E-04 | 5.92E-02 |  |  |
| 8119153 | NM_004373                   | COX6A1                                           | cytochrome c oxidase subunit VIa                               | 0.028  | 1.020 | 8.61E-01 | 8.61E+01 |  |  |
| 8119159 | ---                         | ---                                              | ---                                                            | 0.007  | 1.005 | 9.74E-01 | 9.74E+01 |  |  |
| 8119161 | NM_002648                   | PIM1                                             | pim-1 oncogene                                                 | 0.091  | 1.065 | 3.98E-01 | 3.98E+01 |  |  |
| 8119169 | NM_017772                   | TBC1D22B                                         | TBC1 domain family, member 22B                                 | 0.047  | 1.033 | 7.71E-01 | 7.71E+01 |  |  |
| 8119184 | NM_003958                   | RNF8                                             | ring finger protein 8                                          | -0.098 | 0.935 | 2.63E-01 | 2.63E+01 |  |  |
| 8119196 | ---                         | ---                                              | ---                                                            | -0.039 | 0.974 | 9.49E-01 | 9.49E+01 |  |  |
| 8119198 | NM_015050                   | FTSJ2                                            | FtsJ methyltransferase domain containing 2                     | 0.019  | 1.013 | 9.51E-01 | 9.51E+01 |  |  |
| 8119223 | AK127725                    | FLJ45825                                         | hypothetical protein LOC646888                                 | -0.098 | 0.934 | 8.70E-01 | 8.70E+01 |  |  |
| 8119227 | NM_021943                   | ZFAND3                                           | zinc finger, AN1-type domain 3                                 | 0.050  | 1.035 | 7.44E-01 | 7.44E+01 |  |  |
| 8119237 | AK092662                    | LOC100132005                                     | hypothetical LOC100132005                                      | -0.037 | 0.975 | 8.64E-01 | 8.64E+01 |  |  |
| 8119239 | ---                         | ---                                              | ---                                                            | 0.130  | 1.095 | 7.97E-01 | 7.97E+01 |  |  |
| 8119241 | ---                         | ---                                              | ---                                                            | -0.103 | 0.931 | 8.70E-01 | 8.70E+01 |  |  |
| 8119338 | NM_002062                   | GLP1R                                            | glucagon-like peptide 1 receptor                               | -0.026 | 0.982 | 8.29E-01 | 8.29E+01 |  |  |
| 8119386 | DQ168992                    | TDRG1                                            | testis development related protein 1                           | -0.050 | 0.966 | 7.51E-01 | 7.51E+01 |  |  |
| 8119390 | NM_020737                   | LRFN2                                            | leucine rich repeat and fibronectin type 3 domain containing 2 | -0.086 | 0.942 | 3.12E-01 | 3.12E+01 |  |  |
| 8119396 | NM_00101087                 | BZRPL1                                           | benzodiazepine receptor (peripheral benzodiazepine receptor)   | 0.039  | 1.027 | 7.83E-01 | 7.83E+01 |  |  |
| 8119403 | NM_006789                   | APOBEC2                                          | apolipoprotein B mRNA editing enzyme, cytosine deaminase 2     | -0.025 | 0.983 | 8.88E-01 | 8.88E+01 |  |  |
| 8119408 | NM_002505                   | NFYA                                             | nuclear transcription factor Y, alpha                          | 0.002  | 1.001 | 9.94E-01 | 9.94E+01 |  |  |
| 8119423 | NR_026938                   | LOC221442                                        | adenylate cyclase 10 pseudogene                                | 0.082  | 1.059 | 8.68E-01 | 8.68E+01 |  |  |
| 8119427 | NM_198153                   | TREML4                                           | triggering receptor expressed on myeloid cells 4               | -0.044 | 0.970 | 8.07E-01 | 8.07E+01 |  |  |
| 8119435 | NM_004828                   | NCR2                                             | natural cytotoxicity triggering receptor 2                     | -0.056 | 0.962 | 5.81E-01 | 5.81E+01 |  |  |
| 8119444 | NM_00101242                 | FOXP4                                            | forkhead box P4                                                | 0.067  | 1.047 | 4.76E-01 | 4.76E+01 |  |  |
| 8119466 | NM_005586                   | MDF1                                             | MyoD family inhibitor                                          | -0.100 | 0.933 | 2.51E-01 | 2.51E+01 |  |  |
| 8119492 | NM_004053                   | BYSL                                             | bystin-like                                                    | 0.029  | 1.020 | 8.75E-01 | 8.75E+01 |  |  |
| 8119503 | NM_138572                   | TAF8                                             | TAF8 RNA polymerase II, TATA box binding protein               | -0.025 | 0.983 | 8.49E-01 | 8.49E+01 |  |  |
| 8119515 | NM_000409                   | GUCA1A                                           | guanylate cyclase activator 1A (retinal)                       | -0.035 | 0.976 | 7.05E-01 | 7.05E+01 |  |  |
| 8119525 | AY465895                    | HCRP1                                            | hepatocellular carcinoma-related protein 1                     | 0.021  | 1.015 | 9.53E-01 | 9.53E+01 |  |  |
| 8119529 | NM_015255                   | UBR2                                             | ubiquitin protein ligase E3 component 2                        | -0.015 | 0.990 | 9.24E-01 | 9.24E+01 |  |  |
| 8119582 | NM_015349                   | KIAA0240                                         | KIAA0240                                                       | 0.017  | 1.012 | 9.10E-01 | 9.10E+01 |  |  |
| 8119599 | NM_138296                   | PTCRA                                            | pre-T-cell antigen receptor alpha                              | 0.028  | 1.019 | 7.97E-01 | 7.97E+01 |  |  |
| 8119609 | NM_006586                   | CNPY3                                            | canopy 3 homolog (zebrafish)                                   | -0.019 | 0.987 | 9.14E-01 | 9.14E+01 |  |  |
| 8119627 | NM_006245                   | PPP2R5D                                          | protein phosphatase 2, regulatory subunit 5, delta             | -0.100 | 0.933 | 2.94E-01 | 2.94E+01 |  |  |
| 8119648 | NM_057161                   | KLHDC3                                           | kelch domain containing 3                                      | 0.037  | 1.026 | 8.16E-01 | 8.16E+01 |  |  |
| 8119661 | BC011933                    | C6orf153                                         | chromosome 6 open reading frame 153                            | -0.015 | 0.990 | 9.62E-01 | 9.62E+01 |  |  |
| 8119670 | NM_201523                   | KLC4                                             | kinesin light chain 4                                          | -0.058 | 0.960 | 4.68E-01 | 4.68E+01 |  |  |
| 8119689 | NM_002821                   | PTK7                                             | PTK7 protein tyrosine kinase 7                                 | -0.001 | 0.999 | 9.96E-01 | 9.96E+01 |  |  |
| 8119712 | NM_003131                   | SRF                                              | serum response factor (c-fos serum response factor)            | -0.109 | 0.927 | 1.59E-01 | 1.59E+01 |  |  |
| 8119722 | NM_015089                   | CUL9                                             | culin 9                                                        | -0.053 | 0.964 | 4.93E-01 | 4.93E+01 |  |  |
| 8119765 | NM_032538                   | TTBK1                                            | tau tubulin kinase 1                                           | -0.037 | 0.974 | 7.51E-01 | 7.51E+01 |  |  |
| 8119801 | NM_033450                   | ABCC10                                           | ATP-binding cassette, sub-family C, member 10                  | -0.053 | 0.964 | 5.15E-01 | 5.15E+01 |  |  |
| 8119829 | NM_00114601                 | TJAP1                                            | tight junction associated protein 1                            | -0.122 | 0.919 | 1.36E-01 | 1.36E+01 |  |  |
| 8119842 | NM_203290                   | POLR1C                                           | polymerase (RNA) I polypeptide chain 1                         | -0.031 | 0.979 | 8.97E-01 | 8.97E+01 |  |  |
| 8119858 | NM_006502                   | POLH                                             | polymerase (DNA directed), eta                                 | -0.012 | 0.991 | 9.54E-01 | 9.54E+01 |  |  |
| 8119874 | NM_014628                   | MAD2L1BP                                         | MAD2L1 binding protein                                         | -0.057 | 0.961 | 6.97E-01 | 6.97E+01 |  |  |
| 8119896 | ---                         | ---                                              | ---                                                            | -0.030 | 0.979 | 7.51E-01 | 7.51E+01 |  |  |
| 8119898 | NM_00102536                 | VEGFA                                            | vascular endothelial growth factor A                           | -0.147 | 0.903 | 5.15E-01 | 5.15E+01 |  |  |
| 8119918 | NM_153246                   | C6orf223                                         | chromosome 6 open reading frame 223                            | -0.074 | 0.950 | 5.45E-01 | 5.45E+01 |  |  |
| 8119926 | NM_018426                   | TMEM63B                                          | transmembrane protein 63B                                      | -0.079 | 0.947 | 5.28E-01 | 5.28E+01 |  |  |
| 8119974 | NM_00107817                 | SLC29A1                                          | solute carrier family 29 (nucleoside transporters), member 1   | -0.004 | 0.997 | 9.83E-01 | 9.83E+01 |  |  |
| 8119993 | NM_007355                   | HSP90AB1                                         | heat shock protein 90kDa alpha (class B) class B member 1      | -0.025 | 0.983 | 9.13E-01 | 9.13E+01 |  |  |
| 8120004 | NM_00113756                 | TMEM151B                                         | transmembrane protein 151B                                     | 0.024  | 1.017 | 8.62E-01 | 8.62E+01 |  |  |
| 8120022 | NM_001253                   | CDC5L                                            | CDC5 cell division cycle 5-like (S. pombe)                     | 0.007  | 1.005 | 9.69E-01 | 9.69E+01 |  |  |
| 8120043 | NM_00102463                 | RUNX2                                            | runt-related transcription factor 2                            | -0.260 | 0.835 | 2.64E-02 | 2.64E+00 |  |  |
| 8120061 | NM_014936                   | ENPP4                                            | ectonucleotide pyrophosphatase/ATPase 4                        | -0.035 | 0.976 | 8.87E-01 | 8.87E+01 |  |  |
| 8120102 | NM_012120                   | CD2AP                                            | CD2-associated protein                                         | 0.072  | 1.051 | 5.81E-01 | 5.81E+01 |  |  |
| 8120208 | ---                         | ---                                              | ---                                                            | 0.027  | 1.019 | 8.92E-01 | 8.92E+01 |  |  |
| 8120210 | NM_002190                   | IL17A                                            | interleukin 17A                                                | -0.043 | 0.970 | 7.95E-01 | 7.95E+01 |  |  |
| 8120215 | NM_133367                   | PAQR8                                            | progesterone and adipoQ receptor family class A member 8       | 0.048  | 1.034 | 7.50E-01 | 7.50E+01 |  |  |
| 8120239 | NM_014051                   | TMEM14A                                          | transmembrane protein 14A                                      | -0.063 | 0.957 | 7.69E-01 | 7.69E+01 |  |  |
| 8120249 | NR_001445 // RN75K // RN75S | RNA, 75K small nuclear // RNA, 75S small nuclear |                                                                | -0.029 | 0.980 | 7.27E-01 | 7.27E+01 |  |  |
| 8120251 | NM_033480                   | FBXO9                                            | F-box protein 9                                                | -0.029 | 0.980 | 8.78E-01 | 8.78E+01 |  |  |
| 8120269 | AK095315                    | FBXO9                                            | F-box protein 9                                                | -0.106 | 0.929 | 6.13E-01 | 6.13E+01 |  |  |
| 8120273 | ---                         | ---                                              | ---                                                            | -0.232 | 0.851 | 5.20E-04 | 5.20E-02 |  |  |
| 8120378 | NM_020931                   | KIAA1586                                         | KIAA1586                                                       | 0.024  | 1.017 | 9.42E-01 | 9.42E+01 |  |  |
| 8120382 | NM_00103162                 | ZNF451                                           | zinc finger protein 451                                        | 0.019  | 1.013 | 9.34E-01 | 9.34E+01 |  |  |
| 8120402 | NM_004282                   | BAG2                                             | BCL2-associated athanogene 2                                   | -0.010 | 0.993 | 9.62E-01 | 9.62E+01 |  |  |
| 8120428 | NM_000801                   | FKBP1A                                           | FK506 binding protein 1A, 12kDa                                | 0.231  | 1.174 | 8.09E-03 | 8.09E-01 |  |  |
| 8120431 | NM_003463                   | PTP4A1                                           | protein tyrosine phosphatase type 4A1                          | 0.014  | 1.010 | 9.53E-01 | 9.53E+01 |  |  |
| 8120441 | NM_015153                   | PHF3                                             | PHD finger protein 3                                           | -0.038 | 0.974 | 7.51E-01 | 7.51E+01 |  |  |
| 8120501 | NM_001858                   | COL19A1                                          | collagen, type XIX, alpha 1                                    | -0.011 | 0.992 | 9.54E-01 | 9.54E+01 |  |  |

|         |             |          |                                      |        |       |          |          |
|---------|-------------|----------|--------------------------------------|--------|-------|----------|----------|
| 8120585 | NM_00104430 | SMAP1    | small ArfGAP 1                       | -0.002 | 0.999 | 9.90E-01 | 9.90E+01 |
| 8120600 | ---         | ---      | ---                                  | 0.119  | 1.086 | 3.82E-01 | 3.82E+01 |
| 8120602 | NM_024576   | OGFRL1   | opioid growth factor receptor-like   | -0.256 | 0.838 | 1.98E-01 | 1.98E+01 |
| 8120698 | NM_133645   | MT01     | mitochondrial translation optimiza   | 0.040  | 1.028 | 8.18E-01 | 8.18E+01 |
| 8120756 | ---         | ---      | ---                                  | 0.181  | 1.134 | 6.23E-01 | 6.23E+01 |
| 8120758 | NM_015571   | SEN6     | SUMO1/sentrin specific peptidase     | -0.006 | 0.996 | 9.77E-01 | 9.77E+01 |
| 8120833 | NM_031469   | SH3BGR2  | SH3 domain binding glutamic acid     | 0.178  | 1.131 | 5.55E-01 | 5.55E+01 |
| 8120880 | NM_006670   | TPBG     | trophoblast glycoprotein             | -0.102 | 0.932 | 9.87E-02 | 9.87E+00 |
| 8120883 | NM_015018   | DOPEY1   | dopey family member 1                | 0.086  | 1.061 | 5.15E-01 | 5.15E+01 |
| 8120943 | NM_016230   | CYB5R4   | cytochrome b5 reductase 4            | 0.204  | 1.152 | 2.04E-01 | 2.04E+01 |
| 8120967 | NM_002526   | NT5E     | 5'-nucleotidase, ecto (CD73)         | -0.118 | 0.921 | 8.30E-01 | 8.30E+01 |
| 8120992 | NM_015021   | ZNF292   | zinc finger protein 292              | 0.001  | 1.001 | 9.96E-01 | 9.96E+01 |
| 8121002 | NM_00104249 | C6orf162 | chromosome 6 open reading fram       | 0.055  | 1.039 | 8.30E-01 | 8.30E+01 |
| 8121031 | NM_006416   | SLC35A1  | solute carrier family 35 (CMP-sialic | -0.032 | 0.978 | 8.73E-01 | 8.73E+01 |
| 8121076 | NM_006813   | PNRC1    | proline-rich nuclear receptor coac   | -0.098 | 0.935 | 1.83E-01 | 1.83E+01 |
| 8121085 | ---         | ---      | ---                                  | -0.142 | 0.906 | 7.03E-01 | 7.03E+01 |
| 8121087 | NM_00101085 | PM20D2   | peptidase M20 domain containing      | -0.037 | 0.975 | 8.03E-01 | 8.03E+01 |
| 8121095 | NM_014942   | ANKRD6   | ankyrin repeat domain 6              | -0.069 | 0.953 | 5.43E-01 | 5.43E+01 |
| 8121118 | NM_012115   | CASP8AP2 | caspase 8 associated protein 2       | -0.011 | 0.992 | 9.63E-01 | 9.63E+01 |
| 8121161 | NM_015323   | KIAA0776 | KIAA0776                             | 0.124  | 1.090 | 3.63E-01 | 3.63E+01 |
| 8121209 | NM_005604   | POU3F2   | POU class 3 homeobox 2               | -0.081 | 0.945 | 3.86E-01 | 3.86E+01 |
| 8121214 | ---         | ---      | ---                                  | 0.034  | 1.024 | 9.60E-01 | 9.60E+01 |
| 8121216 | NM_021620   | PRDM13   | PR domain containing 13              | -0.003 | 0.998 | 9.85E-01 | 9.85E+01 |
| 8121257 | NM_001198   | PRDM1    | PR domain containing 1, with ZNF     | 0.102  | 1.073 | 7.16E-01 | 7.16E+01 |
| 8121269 | ---         | ---      | ---                                  | 0.100  | 1.072 | 6.76E-01 | 6.76E+01 |
| 8121273 | ---         | ---      | ---                                  | 0.023  | 1.016 | 9.67E-01 | 9.67E+01 |
| 8121275 | ---         | ---      | ---                                  | -0.147 | 0.903 | 7.46E-01 | 7.46E+01 |
| 8121277 | NM_001624   | AIM1     | absent in melanoma 1                 | 0.277  | 1.212 | 2.48E-02 | 2.48E+00 |
| 8121298 | ---         | ---      | ---                                  | 0.133  | 1.096 | 5.71E-01 | 5.71E+01 |
| 8121300 | NM_018292   | QRSL1    | glutamyl-tRNA synthase (glutam       | 0.178  | 1.131 | 1.26E-01 | 1.26E+01 |
| 8121312 | NM_016487   | C6orf203 | chromosome 6 open reading fram       | -0.009 | 0.994 | 9.77E-01 | 9.77E+01 |
| 8121365 | NM_014555   | FOXO3    | forkhead box O3                      | -0.187 | 0.879 | 1.91E-01 | 1.91E+01 |
| 8121370 | NM_032131   | ARMC2    | armadillo repeat containing 2        | 0.017  | 1.012 | 9.49E-01 | 9.49E+01 |
| 8121416 | ---         | ---      | ---                                  | -0.006 | 0.996 | 9.89E-01 | 9.89E+01 |
| 8121418 | NM_003080   | SMPD2    | sphingomyelin phosphodiesterase      | -0.122 | 0.919 | 2.77E-01 | 2.77E+01 |
| 8121429 | NM_014845   | FIG4     | FIG4 homolog (S. cerevisiae)         | 0.255  | 1.193 | 6.02E-02 | 6.02E+00 |
| 8121454 | NM_005284   | GPR6     | G protein-coupled receptor 6         | -0.132 | 0.912 | 1.91E-01 | 1.91E+01 |
| 8121461 | NM_015891   | CDC40    | cell division cycle 40 homolog (S. c | 0.106  | 1.076 | 1.53E-01 | 1.53E+01 |
| 8121483 | ---         | ---      | ---                                  | 0.115  | 1.083 | 7.00E-01 | 7.00E+01 |
| 8121489 | NM_001634   | AMD1     | adenosylmethionine decarboxylas      | 0.217  | 1.162 | 3.04E-02 | 3.04E+00 |
| 8121502 | NM_138408   | GTF3C6   | general transcription factor IIIC, p | 0.074  | 1.052 | 5.61E-01 | 5.61E+01 |
| 8121510 | NM_032194   | BXDC1    | brix domain containing 1             | 0.204  | 1.152 | 2.09E-01 | 2.09E+01 |
| 8121515 | NM_018593   | SLC16A10 | solute carrier family 16, member 1   | -0.447 | 0.734 | 2.07E-01 | 2.07E+01 |
| 8121525 | NM_153369   | KIAA1919 | KIAA1919                             | 0.081  | 1.057 | 5.63E-01 | 5.63E+01 |
| 8121563 | NM_002356   | MARCKS   | myristoylated alanine-rich protein   | -0.137 | 0.910 | 3.04E-01 | 3.04E+01 |
| 8121578 | NM_152729   | NT5DC1   | 5'-nucleotidase domain containing    | 0.014  | 1.010 | 9.53E-01 | 9.53E+01 |
| 8121588 | NM_013352   | DSE      | dermatan sulfate epimerase           | 0.440  | 1.356 | 1.65E-01 | 1.65E+01 |
| 8121596 | BC146842    | FAM26F   | family with sequence similarity 26   | 0.296  | 1.228 | 1.00E-01 | 1.00E+01 |
| 8121613 | NM_016104   | RWDD1    | RWD domain containing 1              | -0.014 | 0.991 | 9.52E-01 | 9.52E+01 |
| 8121685 | NM_173674   | DCBLD1   | discoidin, CUB and LCCL domain co    | -0.063 | 0.957 | 7.61E-01 | 7.61E+01 |
| 8121704 | NM_138459   | NUS1     | nuclear undecaprenyl pyrophosph      | -0.019 | 0.987 | 8.46E-01 | 8.46E+01 |
| 8121727 | NR_002730   | BRD7P3   | bromodomain containing 7 pseud       | 0.000  | 1.000 | 1.00E+00 | 1.00E+02 |
| 8121729 | NM_002667   | PLN      | phospholamban                        | 0.007  | 1.005 | 9.83E-01 | 9.83E+01 |
| 8121734 | NM_014034   | ASF1A    | ASF1 anti-silencing function 1 hom   | -0.116 | 0.923 | 3.67E-01 | 3.67E+01 |
| 8121739 | ---         | ---      | ---                                  | -0.003 | 0.998 | 9.91E-01 | 9.91E+01 |
| 8121743 | ---         | ---      | ---                                  | -0.028 | 0.981 | 9.07E-01 | 9.07E+01 |
| 8121755 | ---         | ---      | ---                                  | -0.152 | 0.900 | 4.00E-02 | 4.00E+00 |
| 8121757 | NM_004506   | HSF2     | heat shock transcription factor 2    | 0.024  | 1.017 | 9.27E-01 | 9.27E+01 |
| 8121782 | ---         | ---      | ---                                  | 0.023  | 1.016 | 8.92E-01 | 8.92E+01 |
| 8121861 | NM_181782   | NCOA7    | nuclear receptor coactivator 7       | -0.042 | 0.971 | 8.07E-01 | 8.07E+01 |
| 8121884 | ---         | ---      | ---                                  | -0.227 | 0.854 | 5.29E-01 | 5.29E+01 |
| 8121886 | NM_138571   | HINT3    | histidine triad nucleotide binding   | 0.071  | 1.051 | 7.45E-01 | 7.45E+01 |
| 8121927 | NM_030963   | RNF146   | ring finger protein 146              | 0.037  | 1.026 | 8.01E-01 | 8.01E+01 |
| 8122013 | NM_032438   | L3MBTL3  | l(3)mbt-like 3 (Drosophila)          | 0.156  | 1.114 | 5.27E-02 | 5.27E+00 |
| 8122038 | NM_052913   | TMEM200A | transmembrane protein 200A           | 0.017  | 1.012 | 9.48E-01 | 9.48E+01 |
| 8122136 | NM_001016   | RPS12    | ribosomal protein S12                | -0.035 | 0.976 | 7.51E-01 | 7.51E+01 |
| 8122142 | NR_002434   | SNORD101 | small nucleolar RNA, C/D box 101     | -0.362 | 0.778 | 7.51E-02 | 7.51E+00 |
| 8122144 | NR_002436   | SNORA33  | small nucleolar RNA, H/ACA box 3     | -0.144 | 0.905 | 4.48E-01 | 4.48E+01 |
| 8122174 | ---         | ---      | ---                                  | -0.020 | 0.986 | 9.24E-01 | 9.24E+01 |
| 8122182 | NM_004865   | TBPL1    | TBP-like 1                           | -0.084 | 0.943 | 4.81E-01 | 4.81E+01 |
| 8122194 | ---         | ---      | ---                                  | -0.063 | 0.958 | 5.68E-01 | 5.68E+01 |
| 8122196 | ---         | ---      | ---                                  | -0.044 | 0.970 | 7.87E-01 | 7.87E+01 |
| 8122198 | ---         | ---      | ---                                  | 0.011  | 1.007 | 9.71E-01 | 9.71E+01 |
| 8122202 | NM_00113017 | MYB      | v-myb myeloblastosis viral oncoge    | 0.092  | 1.066 | 7.08E-01 | 7.08E+01 |
| 8122222 | NM_018945   | PDE7B    | phosphodiesterase 7B                 | -0.076 | 0.949 | 8.29E-01 | 8.29E+01 |
| 8122240 | ---         | ---      | ---                                  | -0.057 | 0.962 | 9.18E-01 | 9.18E+01 |
| 8122242 | NM_000288   | PEX7     | peroxisomal biogenesis factor 7      | 0.002  | 1.001 | 9.90E-01 | 9.90E+01 |

|         |             |           |                                                          |        |       |          |          |
|---------|-------------|-----------|----------------------------------------------------------|--------|-------|----------|----------|
| 8122256 | NM_00100878 | SLC35D3   | solute carrier family 35, member 3                       | 0.070  | 1.050 | 5.17E-01 | 5.17E+01 |
| 8122259 | ---         | ---       | ---                                                      | -0.053 | 0.964 | 8.43E-01 | 8.43E+01 |
| 8122261 | NM_000416   | IFNGR1    | interferon gamma receptor 1                              | 0.236  | 1.177 | 2.70E-01 | 2.70E+01 |
| 8122317 | NM_014320   | HEBP2     | heme binding protein 2                                   | -0.090 | 0.940 | 8.01E-01 | 8.01E+01 |
| 8122327 | NM_015439   | CCDC28A   | coiled-coil domain containing 28A                        | -0.056 | 0.962 | 8.26E-01 | 8.26E+01 |
| 8122334 | NM_178445   | CCR1      | chemokine (C-C motif) receptor-like                      | -0.141 | 0.907 | 5.98E-01 | 5.98E+01 |
| 8122336 | NM_021243   | C6orf115  | chromosome 6 open reading frame 115                      | 0.129  | 1.094 | 2.03E-01 | 2.03E+01 |
| 8122343 | NM_016217   | HECA      | headcase homolog (Drosophila)                            | -0.046 | 0.969 | 7.72E-01 | 7.72E+01 |
| 8122348 | NM_016485   | VTA1      | Vps20-associated 1 homolog (S. cerevisiae)               | 0.101  | 1.072 | 4.27E-01 | 4.27E+01 |
| 8122426 | NM_014721   | PHACTR2   | phosphatase and actin regulator 2                        | 0.146  | 1.106 | 1.56E-01 | 1.56E+01 |
| 8122440 | NM_032860   | LTV1      | LTV1 homolog (S. cerevisiae)                             | 0.067  | 1.048 | 7.05E-01 | 7.05E+01 |
| 8122457 | NM_003764   | STX11     | syntaxin 11                                              | 0.152  | 1.111 | 5.29E-01 | 5.29E+01 |
| 8122464 | NM_007124   | UTRN      | utrophin                                                 | 0.190  | 1.141 | 5.23E-02 | 5.23E+00 |
| 8122554 | NM_006834   | RAB32     | RAB32, member RAS oncogene family                        | 0.330  | 1.257 | 9.03E-02 | 9.03E+00 |
| 8122598 | ---         | ---       | ---                                                      | 0.025  | 1.018 | 8.40E-01 | 8.40E+01 |
| 8122600 | NM_00112771 | STXBP5    | syntaxin binding protein 5 (tomosyn)                     | -0.207 | 0.867 | 4.97E-02 | 4.97E+00 |
| 8122637 | NM_015278   | SASH1     | SAM and SH3 domain containing 1                          | 0.215  | 1.161 | 5.34E-01 | 5.34E+01 |
| 8122660 | NM_005715   | UST       | uronyl-2-sulfotransferase                                | 0.003  | 1.002 | 9.92E-01 | 9.92E+01 |
| 8122672 | NM_015093   | MAP3K7IP2 | mitogen-activated protein kinase 7 interacting protein 2 | -0.069 | 0.953 | 5.52E-01 | 5.52E+01 |
| 8122684 | NM_00100225 | SUMO4     | SMT3 suppressor of mif two 3 homolog                     | -0.259 | 0.836 | 7.39E-02 | 7.39E+00 |
| 8122689 | AY358952    | C6orf72   | chromosome 6 open reading frame 72                       | -0.166 | 0.891 | 2.37E-01 | 2.37E+01 |
| 8122699 | BC071678    | RPS18P9   | ribosomal protein S18 pseudogene                         | 0.032  | 1.023 | 7.92E-01 | 7.92E+01 |
| 8122701 | ---         | ---       | ---                                                      | 0.079  | 1.056 | 8.47E-01 | 8.47E+01 |
| 8122703 | ---         | ---       | ---                                                      | -0.040 | 0.973 | 8.81E-01 | 8.81E+01 |
| 8122705 | NM_005389   | PCMT1     | protein-L-isoaspartate (D-aspartate) methyltransferase 1 | 0.098  | 1.070 | 5.53E-01 | 5.53E+01 |
| 8122717 | NM_032832   | LRP11     | low density lipoprotein receptor-related protein 11      | -0.030 | 0.979 | 8.15E-01 | 8.15E+01 |
| 8122734 | NM_030949   | PPP1R14C  | protein phosphatase 1, regulatory subunit 14C            | -0.039 | 0.973 | 7.09E-01 | 7.09E+01 |
| 8122740 | ---         | ---       | ---                                                      | 0.053  | 1.037 | 5.87E-01 | 5.87E+01 |
| 8122756 | NM_00102988 | PLEKHG1   | pleckstrin homology domain containing 1                  | 0.200  | 1.149 | 2.28E-01 | 2.28E+01 |
| 8122773 | NM_015440   | MTHFD1L   | methylenetetrahydrofolate dehydrogenase 1-like           | -0.115 | 0.923 | 3.28E-01 | 3.28E+01 |
| 8122840 | X74439      | ESR1      | estrogen receptor 1                                      | -0.093 | 0.937 | 1.96E-01 | 1.96E+01 |
| 8122909 | NM_014892   | RBM16     | RNA binding motif protein 16                             | -0.002 | 0.999 | 9.90E-01 | 9.90E+01 |
| 8122933 | NM_012454   | TIAM2     | T-cell lymphoma invasion and metastasis 2                | -0.206 | 0.867 | 6.76E-02 | 6.76E+00 |
| 8122966 | NM_00100134 | CLDN20    | claudin 20                                               | 0.170  | 1.125 | 3.85E-01 | 3.85E+01 |
| 8122971 | NM_020732   | ARID1B    | AT rich interactive domain 1B (SWI2)                     | -0.018 | 0.988 | 9.25E-01 | 9.25E+01 |
| 8122982 | NM_024630   | ZDHC14    | zinc finger, DHHC-type containing 14                     | -0.130 | 0.914 | 3.70E-01 | 3.70E+01 |
| 8122986 | NM_016224   | SNX9      | sorting nexin 9                                          | -0.302 | 0.811 | 2.93E-03 | 2.93E-01 |
| 8123006 | NM_003898   | SYNJ2     | synaptotagmin 2                                          | -0.034 | 0.977 | 8.38E-01 | 8.38E+01 |
| 8123044 | NM_020245   | TULP4     | tubby like protein 4                                     | 0.014  | 1.010 | 9.49E-01 | 9.49E+01 |
| 8123062 | NM_020823   | TMEM181   | transmembrane protein 181                                | 0.009  | 1.006 | 9.74E-01 | 9.74E+01 |
| 8123080 | NM_00100999 | SYTL3     | synaptotagmin-like 3                                     | -0.212 | 0.863 | 3.31E-01 | 3.31E+01 |
| 8123129 | NM_004906   | WTAP      | Wilms tumor 1 associated protein                         | -0.157 | 0.897 | 6.07E-02 | 6.07E+00 |
| 8123137 | NM_005891   | ACAT2     | acetyl-Coenzyme A acetyltransferase 2                    | -0.154 | 0.899 | 2.81E-01 | 2.81E+01 |
| 8123148 | NM_014161   | MRPL18    | mitochondrial ribosomal protein L18                      | 0.013  | 1.009 | 9.68E-01 | 9.68E+01 |
| 8123230 | NR_003288   | LOC729603 | calcium binding protein P22 pseudogene                   | 0.178  | 1.131 | 2.32E-01 | 2.32E+01 |
| 8123232 | NM_003057   | SLC22A1   | solute carrier family 22 (organic cations), member 1     | -0.027 | 0.981 | 9.16E-01 | 9.16E+01 |
| 8123274 | NM_005922   | MAP3K4    | mitogen-activated protein kinase 4                       | -0.179 | 0.883 | 4.39E-02 | 4.39E+00 |
| 8123332 | ---         | ---       | ---                                                      | 0.049  | 1.035 | 8.70E-01 | 8.70E+01 |
| 8123334 | NR_027284   | LOC441177 | hypothetical LOC441177                                   | -0.002 | 0.999 | 9.91E-01 | 9.91E+01 |
| 8123340 | ---         | ---       | ---                                                      | 0.044  | 1.031 | 7.71E-01 | 7.71E+01 |
| 8123342 | NM_007045   | FGFR1OP   | FGFR1 oncogene partner                                   | -0.028 | 0.981 | 8.89E-01 | 8.89E+01 |
| 8123362 | BX647686    | CCR6      | chemokine (C-C motif) receptor 6                         | 0.033  | 1.023 | 8.76E-01 | 8.76E+01 |
| 8123364 | NM_031409   | CCR6      | chemokine (C-C motif) receptor 6                         | 0.052  | 1.037 | 8.36E-01 | 8.36E+01 |
| 8123372 | BX647686    | CCR6      | chemokine (C-C motif) receptor 6                         | -0.008 | 0.994 | 9.78E-01 | 9.78E+01 |
| 8123407 | NM_00104000 | MLLT4     | myeloid/lymphoid or mixed-lineage leukemia 4             | -0.289 | 0.819 | 8.62E-02 | 8.62E+00 |
| 8123463 | NM_018288   | PHF10     | PHD finger protein 10                                    | 0.009  | 1.006 | 9.65E-01 | 9.65E+01 |
| 8123467 | NM_018341   | C6orf70   | chromosome 6 open reading frame 70                       | 0.081  | 1.058 | 6.01E-01 | 6.01E+01 |
| 8123488 | NR_026780   | C6orf208  | chromosome 6 open reading frame 208                      | 0.022  | 1.015 | 8.38E-01 | 8.38E+01 |
| 8123494 | NM_032448   | FAM120B   | family with sequence similarity 120, member B            | 0.001  | 1.001 | 9.96E-01 | 9.96E+01 |
| 8123507 | NM_003194   | TBP       | TATA box binding protein                                 | 0.013  | 1.009 | 9.51E-01 | 9.51E+01 |
| 8123520 | BC118988    | C20orf69  | chromosome 20 open reading frame 69                      | 0.006  | 1.005 | 9.82E-01 | 9.82E+01 |
| 8123524 | NM_018303   | EXOC2     | exocyst complex component 2                              | -0.048 | 0.967 | 7.55E-01 | 7.55E+01 |
| 8123558 | NM_148959   | HUS1B     | HUS1 checkpoint homolog b (S. pombe)                     | -0.146 | 0.903 | 2.26E-01 | 2.26E+01 |
| 8123562 | NM_001500   | GMD5      | GDP-mannose 4,6-dehydratase                              | 0.018  | 1.013 | 9.26E-01 | 9.26E+01 |
| 8123584 | NM_00101241 | MYLK4     | myosin light chain kinase family, nonmuscle 4            | 0.124  | 1.090 | 3.16E-01 | 3.16E+01 |
| 8123598 | NM_030666   | SERPINB1  | serpin peptidase inhibitor, clade B, member 1            | -0.041 | 0.972 | 9.05E-01 | 9.05E+01 |
| 8123606 | BC025340    | MGC39372  | hypothetical protein MGC39372                            | -0.032 | 0.978 | 9.50E-01 | 9.50E+01 |
| 8123609 | NM_004155   | SERPINB9  | serpin peptidase inhibitor, clade B, member 9            | -0.300 | 0.812 | 6.06E-02 | 6.06E+00 |
| 8123621 | NM_004568   | SERPINB6  | serpin peptidase inhibitor, clade B, member 6            | -0.104 | 0.930 | 6.00E-01 | 6.00E+01 |
| 8123637 | NM_000904   | NQO2      | NAD(P)H dehydrogenase, quinone 2                         | 0.013  | 1.009 | 9.56E-01 | 9.56E+01 |
| 8123642 | ---         | ---       | ---                                                      | 0.109  | 1.079 | 6.37E-01 | 6.37E+01 |
| 8123644 | NM_001069   | TUBB2A    | tubulin, beta 2A                                         | -0.185 | 0.880 | 2.07E-01 | 2.07E+01 |
| 8123651 | NM_178012   | TUBB2B    | tubulin, beta 2B                                         | -0.191 | 0.876 | 2.58E-02 | 2.58E+00 |
| 8123658 | NM_015482   | SLC22A23  | solute carrier family 22, member 23                      | -0.004 | 0.997 | 9.81E-01 | 9.81E+01 |
| 8123678 | NM_183373   | C6orf145  | chromosome 6 open reading frame 145                      | 0.077  | 1.055 | 7.38E-01 | 7.38E+01 |
| 8123695 | NM_206836   | PECI      | peroxisomal D3,D2-enoyl-CoA isomerase                    | -0.054 | 0.963 | 7.81E-01 | 7.81E+01 |
| 8123714 | ---         | ---       | ---                                                      | 0.076  | 1.054 | 7.52E-01 | 7.52E+01 |

|         |             |              |                                      |        |       |          |          |
|---------|-------------|--------------|--------------------------------------|--------|-------|----------|----------|
| 8123728 | NM_020408   | LYRM4        | LYR motif containing 4               | -0.008 | 0.994 | 9.80E-01 | 9.80E+01 |
| 8123737 | ---         | ---          | ---                                  | 0.063  | 1.045 | 7.89E-01 | 7.89E+01 |
| 8123760 | NR_026970   | RP3-398D13.1 | hypothetical LOC285780               | 0.057  | 1.040 | 6.80E-01 | 6.80E+01 |
| 8123763 | ---         | ---          | ---                                  | -0.018 | 0.987 | 9.09E-01 | 9.09E+01 |
| 8123767 | NM_003144   | SSR1         | signal sequence receptor, alpha      | 0.170  | 1.125 | 1.66E-02 | 1.66E+00 |
| 8123802 | NM_201280   | MUTED        | muted homolog (mouse)                | 0.090  | 1.065 | 3.50E-01 | 3.50E+01 |
| 8123891 | ---         | ---          | ---                                  | -0.014 | 0.991 | 9.57E-01 | 9.57E+01 |
| 8123893 | NM_005906   | MAK          | male germ cell-associated kinase     | -0.072 | 0.951 | 6.84E-01 | 6.84E+01 |
| 8123929 | NM_207582   | HERV-FRD     | HERV-FRD provirus ancestral Env p    | -0.120 | 0.920 | 2.23E-01 | 2.23E+01 |
| 8123936 | NM_00114239 | NEDD9        | neural precursor cell expressed, d   | 0.060  | 1.043 | 5.55E-01 | 5.55E+01 |
| 8123951 | NM_00114394 | C6orf105     | chromosome 6 open reading fram       | -0.058 | 0.961 | 8.54E-01 | 8.54E+01 |
| 8123961 | NM_016495   | TBC1D7       | TBC1 domain family, member 7         | -0.168 | 0.890 | 3.35E-01 | 3.35E+01 |
| 8123976 | NM_018988   | GFOD1        | glucose-fructose oxidoreductase d    | -0.024 | 0.983 | 8.92E-01 | 8.92E+01 |
| 8123985 | NM_016167   | NOL7         | nucleolar protein 7, 27kDa           | -0.035 | 0.976 | 8.18E-01 | 8.18E+01 |
| 8123989 | NM_005493   | RANBP9       | RAN binding protein 9                | -0.023 | 0.984 | 8.86E-01 | 8.86E+01 |
| 8124008 | NM_00103171 | CCDC90A      | coiled-coil domain containing 90A    | 0.160  | 1.118 | 2.93E-01 | 2.93E+01 |
| 8124020 | ---         | ---          | ---                                  | 0.025  | 1.017 | 9.71E-01 | 9.71E+01 |
| 8124022 | NM_183040   | DTNBP1       | dystrobrevin binding protein 1       | 0.116  | 1.084 | 1.56E-01 | 1.56E+01 |
| 8124038 | ---         | ---          | ---                                  | 0.055  | 1.039 | 7.92E-01 | 7.92E+01 |
| 8124040 | NM_000332   | ATXN1        | ataxin 1                             | -0.024 | 0.983 | 9.25E-01 | 9.25E+01 |
| 8124055 | ---         | ---          | ---                                  | 0.005  | 1.003 | 9.81E-01 | 9.81E+01 |
| 8124059 | NM_005124   | NUP153       | nucleoporin 153kDa                   | -0.050 | 0.966 | 6.76E-01 | 6.76E+01 |
| 8124082 | ---         | ---          | ---                                  | -0.080 | 0.946 | 4.12E-01 | 4.12E+01 |
| 8124088 | NM_022113   | KIF13A       | kinesin family member 13A            | 0.100  | 1.071 | 8.07E-01 | 8.07E+01 |
| 8124144 | NM_003472   | DEK          | DEK oncogene                         | 0.012  | 1.009 | 9.27E-01 | 9.27E+01 |
| 8124160 | ---         | ---          | ---                                  | -0.299 | 0.813 | 8.52E-01 | 8.52E+01 |
| 8124166 | NM_00108048 | MBOAT1       | membrane bound O-acyltransfera       | 0.286  | 1.220 | 5.89E-02 | 5.89E+00 |
| 8124183 | ---         | ---          | ---                                  | 0.022  | 1.015 | 9.57E-01 | 9.57E+01 |
| 8124194 | ---         | ---          | ---                                  | -0.063 | 0.957 | 6.00E-01 | 6.00E+01 |
| 8124262 | NM_016614   | TTRAP        | TRAF and TNF receptor associated     | 0.005  | 1.003 | 9.88E-01 | 9.88E+01 |
| 8124273 | NM_030939   | C6orf62      | chromosome 6 open reading fram       | 0.063  | 1.045 | 5.67E-01 | 5.67E+01 |
| 8124280 | NM_014722   | FAM65B       | family with sequence similarity 65   | 0.098  | 1.070 | 5.15E-01 | 5.15E+01 |
| 8124305 | ---         | ---          | ---                                  | -0.062 | 0.958 | 7.11E-01 | 7.11E+01 |
| 8124307 | NR_002174   | CMAH         | cytidine monophosphate-N-acetyl      | -0.218 | 0.860 | 3.96E-01 | 3.96E+01 |
| 8124327 | ---         | ---          | ---                                  | 0.205  | 1.153 | 4.72E-02 | 4.72E+00 |
| 8124385 | NM_003544   | HIST1H4B     | histone cluster 1, H4b               | 0.138  | 1.101 | 6.39E-01 | 6.39E+01 |
| 8124391 | NM_003513   | HIST1H2AB    | histone cluster 1, H2ab              | -0.125 | 0.917 | 7.97E-01 | 7.97E+01 |
| 8124394 | NM_021062   | HIST1H2BB    | histone cluster 1, H2bb              | -0.024 | 0.983 | 8.89E-01 | 8.89E+01 |
| 8124397 | NM_005319   | HIST1H1C     | histone cluster 1, H1c               | 0.081  | 1.058 | 7.74E-01 | 7.74E+01 |
| 8124406 | NM_003526   | HIST1H2BC    | histone cluster 1, H2bc              | 0.217  | 1.162 | 8.30E-02 | 8.30E+00 |
| 8124413 | NM_003539   | HIST1H4D     | histone cluster 1, H4d               | 0.125  | 1.091 | 5.97E-01 | 5.97E+01 |
| 8124416 | NM_003530   | HIST1H3D     | histone cluster 1, H3d               | 0.002  | 1.001 | 9.93E-01 | 9.93E+01 |
| 8124423 | NM_003518   | HIST1H2BG    | histone cluster 1, H2bg              | -0.075 | 0.950 | 7.11E-01 | 7.11E+01 |
| 8124430 | NM_005320   | HIST1H1D     | histone cluster 1, H1d               | 0.062  | 1.044 | 8.04E-01 | 8.04E+01 |
| 8124437 | NM_021018   | HIST1H3F     | histone cluster 1, H3f               | 0.005  | 1.004 | 9.88E-01 | 9.88E+01 |
| 8124446 | ---         | ---          | ---                                  | -0.002 | 0.999 | 9.91E-01 | 9.91E+01 |
| 8124448 | NM_003543   | HIST1H4H     | histone cluster 1, H4h               | 0.215  | 1.161 | 6.92E-02 | 6.92E+00 |
| 8124467 | ---         | ---          | ---                                  | -0.089 | 0.940 | 5.79E-01 | 5.79E+01 |
| 8124469 | BC171739    | GUSBL1       | glucuronidase, beta-like 1           | -0.013 | 0.991 | 9.71E-01 | 9.71E+01 |
| 8124492 | NM_080593   | HIST1H2BK    | histone cluster 1, H2bk              | 0.065  | 1.046 | 8.78E-01 | 8.78E+01 |
| 8124502 | NM_007149   | ZNF184       | zinc finger protein 184              | -0.085 | 0.943 | 5.60E-01 | 5.60E+01 |
| 8124524 | NM_003510   | HIST1H2AK    | histone cluster 1, H2ak              | -0.076 | 0.948 | 5.71E-01 | 5.71E+01 |
| 8124531 | NM_003533   | HIST1H3I     | histone cluster 1, H3i               | -0.124 | 0.918 | 6.34E-01 | 6.34E+01 |
| 8124551 | NR_002936   | LOC222699    | transducer of ERBB2, 2 pseudoge      | -0.058 | 0.961 | 6.33E-01 | 6.33E+01 |
| 8124553 | NM_019110   | ZKSCAN4      | zinc finger with KRAB and SCAN do    | 0.033  | 1.023 | 8.55E-01 | 8.55E+01 |
| 8124610 | NM_006510   | TRIM27       | tripartite motif-containing 27       | 0.020  | 1.014 | 8.79E-01 | 8.79E+01 |
| 8124650 | NM_006398   | UBD          | ubiquitin D                          | 0.072  | 1.051 | 8.74E-01 | 8.74E+01 |
| 8124654 | NM_001470   | GABBR1       | gamma-aminobutyric acid (GABA)       | 0.015  | 1.010 | 9.37E-01 | 9.37E+01 |
| 8124684 | NM_00110980 | ZFP57        | zinc finger protein 57 homolog (m    | 0.033  | 1.023 | 9.01E-01 | 9.01E+01 |
| 8124689 | NR_002139   | HCG4         | HLA complex group 4                  | 0.051  | 1.036 | 7.50E-01 | 7.50E+01 |
| 8124691 | AY358246    | HCG8         | HLA complex group 8                  | 0.004  | 1.003 | 9.89E-01 | 9.89E+01 |
| 8124695 | NM_025236   | RNF39        | ring finger protein 39               | -0.032 | 0.978 | 7.91E-01 | 7.91E+01 |
| 8124707 | NM_007028   | TRIM31       | tripartite motif-containing 31       | -0.033 | 0.977 | 8.01E-01 | 8.01E+01 |
| 8124716 | NM_006778   | TRIM10       | tripartite motif-containing 10       | -0.101 | 0.933 | 2.02E-01 | 2.02E+01 |
| 8124726 | NM_003449   | TRIM26       | tripartite motif-containing 26       | 0.045  | 1.032 | 7.19E-01 | 7.19E+01 |
| 8124742 | NM_005275   | GNL1         | guanine nucleotide binding protei    | -0.143 | 0.906 | 1.30E-01 | 1.30E+01 |
| 8124756 | NM_002714   | PPP1R10      | protein phosphatase 1, regulatory    | -0.121 | 0.919 | 1.09E-01 | 1.09E+01 |
| 8124775 | NM_003587   | DHX16        | DEAH (Asp-Glu-Ala-His) box polyp     | 0.040  | 1.028 | 6.68E-01 | 6.68E+01 |
| 8124798 | NM_133471   | KIAA1949     | KIAA1949                             | -0.036 | 0.975 | 8.25E-01 | 8.25E+01 |
| 8124806 | NM_007243   | NRM          | nurim (nuclear envelope membra       | -0.090 | 0.940 | 4.70E-01 | 4.70E+01 |
| 8124813 | NM_014641   | MDC1         | mediator of DNA-damage checkpo       | -0.103 | 0.931 | 3.80E-01 | 3.80E+01 |
| 8124828 | NM_005803   | FLOT1        | flotillin 1                          | 0.030  | 1.021 | 9.06E-01 | 9.06E+01 |
| 8124859 | NM_014070   | C6orf15      | chromosome 6 open reading fram       | -0.076 | 0.949 | 4.32E-01 | 4.32E+01 |
| 8124862 | NM_001264   | CDSN         | corneodesmosin                       | -0.016 | 0.989 | 9.16E-01 | 9.16E+01 |
| 8124865 | NM_014069   | PSORS1C2     | psoriasis susceptibility 1 candidat  | 0.036  | 1.025 | 7.30E-01 | 7.30E+01 |
| 8124868 | NM_00110556 | CCHCR1       | coiled-coil alpha-helical rod protei | -0.082 | 0.945 | 1.82E-01 | 1.82E+01 |
| 8124889 | NM_002701   | POU5F1       | POU class 5 homeobox 1               | -0.020 | 0.986 | 8.41E-01 | 8.41E+01 |

|         |             |          |                                                        |        |       |          |          |
|---------|-------------|----------|--------------------------------------------------------|--------|-------|----------|----------|
| 8124901 | NM_002117   | HLA-C    | major histocompatibility complex,                      | 0.009  | 1.007 | 9.60E-01 | 9.60E+01 |
| 8124911 | NM_005514   | HLA-B    | major histocompatibility complex,                      | 0.003  | 1.002 | 9.86E-01 | 9.86E+01 |
| 8124920 | ---         | ---      | ---                                                    | -0.056 | 0.962 | 8.08E-01 | 8.08E+01 |
| 8124926 | NM_004640   | BAT1     | HLA-B associated transcript 1                          | -0.051 | 0.965 | 4.93E-01 | 4.93E+01 |
| 8124940 | NR_003140   | SNORD117 | small nucleolar RNA, C/D box 117                       | -0.030 | 0.979 | 9.56E-01 | 9.56E+01 |
| 8124942 | NM_130463   | ATP6V1G2 | ATPase, H+ transporting, lysosomal                     | 0.022  | 1.016 | 9.09E-01 | 9.09E+01 |
| 8124950 | NM_002341   | LTB      | lymphotoxin beta (TNF superfamily)                     | -0.049 | 0.966 | 6.99E-01 | 6.99E+01 |
| 8124955 | NM_00114546 | NCR3     | natural cytotoxicity triggering receptor               | 0.005  | 1.003 | 9.78E-01 | 9.78E+01 |
| 8124967 | NM_004639   | BAT3     | HLA-B associated transcript 3                          | -0.022 | 0.985 | 9.05E-01 | 9.05E+01 |
| 8124994 | NM_021184   | C6orf47  | chromosome 6 open reading frame                        | -0.033 | 0.977 | 8.48E-01 | 8.48E+01 |
| 8124998 | NM_033177   | BAT4     | HLA-B associated transcript 4                          | -0.129 | 0.914 | 6.89E-02 | 6.89E+00 |
| 8125007 | NM_025262   | LY6G5C   | lymphocyte antigen 6 complex, locus                    | -0.159 | 0.896 | 7.33E-02 | 7.33E+00 |
| 8125017 | NM_021160   | BAT5     | HLA-B associated transcript 5                          | 0.043  | 1.031 | 6.29E-01 | 6.29E+01 |
| 8125038 | NR_003673   | LY6G6E   | lymphocyte antigen 6 complex, locus                    | -0.046 | 0.968 | 6.58E-01 | 6.58E+01 |
| 8125042 | NM_025261   | LY6G6C   | lymphocyte antigen 6 complex, locus                    | -0.008 | 0.994 | 9.64E-01 | 9.64E+01 |
| 8125048 | NM_013974   | DDAH2    | dimethylarginine dimethylaminohydrolase                | 0.142  | 1.103 | 8.58E-02 | 8.58E+00 |
| 8125059 | NM_001288   | CLIC1    | chloride intracellular channel 1                       | 0.213  | 1.159 | 2.74E-01 | 2.74E+01 |
| 8125072 | NM_025258   | C6orf27  | chromosome 6 open reading frame                        | -0.006 | 0.996 | 9.66E-01 | 9.66E+01 |
| 8125091 | NM_006295   | VAR5     | valyl-tRNA synthetase                                  | 0.054  | 1.038 | 7.03E-01 | 7.03E+01 |
| 8125123 | ---         | ---      | ---                                                    | 0.032  | 1.022 | 8.47E-01 | 8.47E+01 |
| 8125125 | NM_021177   | LSM2     | LSM2 homolog, U6 small nuclear RNA                     | 0.119  | 1.086 | 3.35E-01 | 3.35E+01 |
| 8125134 | NM_005527   | HSPA1L   | heat shock 70kDa protein 1-like                        | -0.108 | 0.928 | 6.09E-01 | 6.09E+01 |
| 8125139 | NM_000434   | NEU1     | sialidase 1 (lysosomal sialidase)                      | -0.015 | 0.990 | 9.64E-01 | 9.64E+01 |
| 8125149 | NM_025257   | SLC44A4  | solute carrier family 44, member 4                     | -0.028 | 0.981 | 8.38E-01 | 8.38E+01 |
| 8125172 | NM_006709   | EHMT2    | euchromatic histone-lysine N-methyltransferase         | -0.134 | 0.911 | 2.91E-02 | 2.91E+00 |
| 8125201 | NM_181842   | ZBTB12   | zinc finger and BTB domain containing protein          | -0.019 | 0.987 | 8.38E-01 | 8.38E+01 |
| 8125204 | NM_002904   | RDBP     | RD RNA binding protein                                 | -0.076 | 0.948 | 4.81E-01 | 4.81E+01 |
| 8125220 | NM_005510   | DOM3Z    | dom-3 homolog Z (C. elegans)                           | -0.102 | 0.932 | 4.34E-01 | 4.34E+01 |
| 8125234 | NM_019105   | TNXB     | tenascin XB                                            | -0.017 | 0.988 | 8.53E-01 | 8.53E+01 |
| 8125289 | NR_001284   | TNXA     | tenascin XA pseudogene                                 | -0.024 | 0.983 | 8.86E-01 | 8.86E+01 |
| 8125295 | NM_004381   | ATF6B    | activating transcription factor 6 beta                 | -0.059 | 0.960 | 6.56E-01 | 6.56E+01 |
| 8125316 | NM_022110   | FKBP1    | FK506 binding protein like                             | -0.038 | 0.974 | 8.27E-01 | 8.27E+01 |
| 8125321 | NM_030651   | PRRT1    | proline-rich transmembrane protein                     | -0.009 | 0.994 | 9.64E-01 | 9.64E+01 |
| 8125328 | NM_006411   | AGPAT1   | 1-acylglycerol-3-phosphate O-acyltransferase           | -0.040 | 0.973 | 7.73E-01 | 7.73E+01 |
| 8125341 | NM_001136   | AGER     | advanced glycosylation end product specific            | -0.029 | 0.980 | 8.59E-01 | 8.59E+01 |
| 8125360 | NM_002586   | PBX2     | pre-B-cell leukemia homeobox 2                         | 0.023  | 1.016 | 8.72E-01 | 8.72E+01 |
| 8125373 | NM_022107   | GPSM3    | G-protein signaling modulator 3 (family 3)             | -0.003 | 0.998 | 9.86E-01 | 9.86E+01 |
| 8125383 | NM_004557   | NOTCH4   | Notch homolog 4 (Drosophila)                           | -0.079 | 0.946 | 2.94E-01 | 2.94E+01 |
| 8125426 | NM_019602   | BTNL2    | butyrophilin-like 2 (MHC class II associated)          | -0.064 | 0.957 | 5.65E-01 | 5.65E+01 |
| 8125436 | NM_002125   | HLA-DRB5 | major histocompatibility complex, class II, DRB5       | 0.243  | 1.184 | 7.27E-01 | 7.27E+01 |
| 8125447 | NM_002123   | HLA-DQB1 | major histocompatibility complex, class II, DQB1       | 0.339  | 1.265 | 6.29E-01 | 6.29E+01 |
| 8125461 | AK097297    | HLA-DQB1 | major histocompatibility complex, class II, DQB1       | 0.405  | 1.324 | 7.13E-01 | 7.13E+01 |
| 8125463 | NR_003937   | HLA-DQB2 | major histocompatibility complex, class II, DQB2       | 0.233  | 1.175 | 6.06E-02 | 6.06E+00 |
| 8125470 | NM_002120   | HLA-DOB  | major histocompatibility complex, class II, DOB        | -0.028 | 0.981 | 9.36E-01 | 9.36E+01 |
| 8125483 | NM_000544   | TAP2     | transporter 2, ATP-binding cassette                    | 0.046  | 1.032 | 8.21E-01 | 8.21E+01 |
| 8125500 | NM_004159   | PSMB8    | proteasome (prosome, macropain) subunit type 8         | 0.149  | 1.109 | 2.29E-01 | 2.29E+01 |
| 8125512 | NM_000593   | TAP1     | transporter 1, ATP-binding cassette                    | 0.068  | 1.048 | 6.66E-01 | 6.66E+01 |
| 8125527 | AF275684    | AR2P1    | protein phosphatase 1, regulatory                      | -0.051 | 0.965 | 7.26E-01 | 7.26E+01 |
| 8125545 | NM_002119   | HLA-DOA  | major histocompatibility complex, class II, DOA        | 0.243  | 1.183 | 1.43E-02 | 1.43E+00 |
| 8125568 | NM_080680   | COL11A2  | collagen, type XI, alpha 2                             | -0.027 | 0.981 | 7.73E-01 | 7.73E+01 |
| 8125638 | NM_021976   | RXRB     | retinoid X receptor, beta                              | 0.001  | 1.001 | 9.97E-01 | 9.97E+01 |
| 8125649 | NM_022553   | VP52     | vacuolar protein sorting 52 homolog                    | 0.070  | 1.050 | 5.13E-01 | 5.13E+01 |
| 8125671 | NM_005452   | WDR46    | WD repeat domain 46                                    | -0.062 | 0.958 | 6.40E-01 | 6.40E+01 |
| 8125687 | NM_004761   | RLG2     | ral guanine nucleotide dissociation inhibitor          | -0.115 | 0.923 | 2.50E-01 | 2.50E+01 |
| 8125713 | NM_172208   | TAPBP    | TAP binding protein (tapasin)                          | 0.042  | 1.030 | 7.51E-01 | 7.51E+01 |
| 8125731 | NM_005453   | ZBTB22   | zinc finger and BTB domain containing protein          | -0.084 | 0.943 | 3.09E-01 | 3.09E+01 |
| 8125734 | NM_00114196 | DAXX     | death-domain associated protein                        | -0.026 | 0.982 | 8.82E-01 | 8.82E+01 |
| 8125748 | NR_001444   | LYPLA2P1 | lysophospholipase II pseudogene                        | 0.027  | 1.019 | 9.00E-01 | 9.00E+01 |
| 8125750 | NM_000976   | RPL12    | ribosomal protein L12                                  | 0.033  | 1.023 | 8.78E-01 | 8.78E+01 |
| 8125752 | NM_015921   | CUTA     | cutA divalent cation tolerance homolog                 | 0.054  | 1.038 | 7.45E-01 | 7.45E+01 |
| 8125766 | NM_001188   | BAK1     | BCL2-antagonist/killer 1                               | -0.033 | 0.978 | 9.01E-01 | 9.01E+01 |
| 8125772 | NR_027908   | C6orf227 | chromosome 6 open reading frame                        | 0.016  | 1.011 | 9.20E-01 | 9.20E+01 |
| 8125775 | AY568085    | C6orf125 | chromosome 6 open reading frame                        | 0.116  | 1.083 | 5.74E-01 | 5.74E+01 |
| 8125780 | NM_054111   | IP6K3    | inositol hexakisphosphate kinase 3                     | -0.038 | 0.974 | 7.45E-01 | 7.45E+01 |
| 8125788 | NM_181336   | LEMD2    | LEM domain containing 2                                | -0.035 | 0.976 | 7.63E-01 | 7.63E+01 |
| 8125798 | NM_002418   | MLN      | motilin                                                | -0.032 | 0.978 | 7.72E-01 | 7.72E+01 |
| 8125805 | NM_000841   | GRM4     | glutamate receptor, metabotropic                       | -0.038 | 0.974 | 6.28E-01 | 6.28E+01 |
| 8125818 | NM_178508   | C6orf1   | chromosome 6 open reading frame                        | -0.087 | 0.941 | 3.69E-01 | 3.69E+01 |
| 8125825 | NM_006703   | NUDT3    | nudix (nucleoside diphosphate linked moiety X) motif 3 | 0.121  | 1.087 | 2.46E-01 | 2.46E+01 |
| 8125835 | NM_001014   | RPS10    | ribosomal protein S10                                  | -0.005 | 0.997 | 9.85E-01 | 9.85E+01 |
| 8125843 | NM_012391   | SPDEF    | SAM pointed domain containing protein                  | -0.046 | 0.968 | 6.09E-01 | 6.09E+01 |
| 8125850 | NM_024294   | C6orf106 | chromosome 6 open reading frame                        | 0.027  | 1.019 | 8.47E-01 | 8.47E+01 |
| 8125857 | ---         | ---      | ---                                                    | 0.092  | 1.066 | 6.84E-01 | 6.84E+01 |
| 8125859 | NM_005643   | TAF11    | TAF11 RNA polymerase II, TATA box                      | 0.050  | 1.035 | 7.72E-01 | 7.72E+01 |
| 8125870 | NM_00109372 | TCP11    | t-complex 11 homolog (mouse)                           | -0.067 | 0.955 | 3.72E-01 | 3.72E+01 |
| 8125887 | NM_003214   | TEAD3    | TEA domain family member 3                             | -0.086 | 0.942 | 2.03E-01 | 2.03E+01 |
| 8125903 | NM_003322   | TULP1    | tubby like protein 1                                   | 0.036  | 1.025 | 7.78E-01 | 7.78E+01 |

|         |              |           |                                                                               |        |       |          |          |  |  |
|---------|--------------|-----------|-------------------------------------------------------------------------------|--------|-------|----------|----------|--|--|
| 8125919 | NM_00114577  | FKBP5     | FK506 binding protein 5                                                       | 0.183  | 1.135 | 1.09E-01 | 1.09E+01 |  |  |
| 8125936 | NM_001832    | CLPS      | collipase, pancreatic                                                         | -0.067 | 0.954 | 5.01E-01 | 5.01E+01 |  |  |
| 8125941 | NM_003137    | SRPK1     | SFRS protein kinase 1                                                         | -0.079 | 0.947 | 4.77E-01 | 4.77E+01 |  |  |
| 8125993 | NM_016135    | ETV7      | ets variant 7                                                                 | 0.071  | 1.051 | 6.37E-01 | 6.37E+01 |  |  |
| 8126018 | NM_007271    | STK38     | serine/threonine kinase 38                                                    | 0.067  | 1.047 | 5.34E-01 | 5.34E+01 |  |  |
| 8126058 | NM_016059    | PP1L1     | peptidylprolyl isomerase (cyclophilin)                                        | -0.010 | 0.993 | 9.65E-01 | 9.65E+01 |  |  |
| 8126066 | NM_014341    | MTCH1     | mitochondrial carrier homolog 1 (mitochondrial carrier)                       | 0.026  | 1.018 | 9.02E-01 | 9.02E+01 |  |  |
| 8126095 | NM_138493    | C6orf129  | chromosome 6 open reading frame 129                                           | 0.071  | 1.051 | 7.86E-01 | 7.86E+01 |  |  |
| 8126119 | ---          | ---       | ---                                                                           | -0.061 | 0.958 | 8.57E-01 | 8.57E+01 |  |  |
| 8126121 | NM_052893    | BTBD9     | BTB (POZ) domain containing 9                                                 | -0.058 | 0.960 | 5.72E-01 | 5.72E+01 |  |  |
| 8126147 | BC022007     | C6orf64   | chromosome 6 open reading frame 64                                            | -0.013 | 0.991 | 9.50E-01 | 9.50E+01 |  |  |
| 8126173 | NM_00113510  | KCNK16    | potassium channel, subfamily K, member 16                                     | -0.033 | 0.977 | 7.97E-01 | 7.97E+01 |  |  |
| 8126212 | ---          | ---       | ---                                                                           | -0.050 | 0.966 | 6.00E-01 | 6.00E+01 |  |  |
| 8126240 | AK123643     | FLJ141649 | hypothetical LOC401260                                                        | -0.065 | 0.956 | 5.27E-01 | 5.27E+01 |  |  |
| 8126248 | NM_173561    | UNC5CL    | unc-5 homolog C (C. elegans)-like                                             | 0.054  | 1.038 | 6.56E-01 | 6.56E+01 |  |  |
| 8126259 | AJ420538     | C6orf130  | chromosome 6 open reading frame 130                                           | -0.069 | 0.954 | 5.09E-01 | 5.09E+01 |  |  |
| 8126269 | NM_178174    | TREML1    | triggering receptor expressed on myeloid cells 1                              | -0.022 | 0.985 | 9.10E-01 | 9.10E+01 |  |  |
| 8126279 | NM_018965    | TREM2     | triggering receptor expressed on myeloid cells 2                              | 0.184  | 1.136 | 4.78E-02 | 4.78E+00 |  |  |
| 8126288 | NM_024807    | TREML2    | triggering receptor expressed on myeloid cells 2                              | 0.016  | 1.011 | 9.16E-01 | 9.16E+01 |  |  |
| 8126296 | NR_027256    | TREML3    | triggering receptor expressed on myeloid cells 3                              | -0.039 | 0.973 | 8.13E-01 | 8.13E+01 |  |  |
| 8126301 | ---          | ---       | ---                                                                           | -0.059 | 0.960 | 6.68E-01 | 6.68E+01 |  |  |
| 8126312 | NM_007162    | TFEB      | transcription factor EB                                                       | -0.015 | 0.990 | 9.18E-01 | 9.18E+01 |  |  |
| 8126337 | NM_006653    | FRS3      | fibroblast growth factor receptor tyrosine kinase 3                           | -0.016 | 0.989 | 9.46E-01 | 9.46E+01 |  |  |
| 8126360 | NM_004275    | MED20     | mediator complex subunit 20                                                   | -0.088 | 0.941 | 5.77E-01 | 5.77E+01 |  |  |
| 8126371 | NM_001760    | CCND3     | cyclin D3                                                                     | 0.002  | 1.001 | 9.91E-01 | 9.91E+01 |  |  |
| 8126379 | ENST00000341 | C6orf132  | chromosome 6 open reading frame 132                                           | -0.010 | 0.993 | 9.52E-01 | 9.52E+01 |  |  |
| 8126382 | ENST00000341 | C6orf132  | chromosome 6 open reading frame 132                                           | 0.013  | 1.009 | 9.27E-01 | 9.27E+01 |  |  |
| 8126387 | NM_002098    | GUCA1B    | guanylate cyclase activator 1B (retinal)                                      | -0.059 | 0.960 | 5.73E-01 | 5.73E+01 |  |  |
| 8126394 | NM_018141    | MRPS10    | mitochondrial ribosomal protein S10                                           | -0.062 | 0.958 | 6.91E-01 | 6.91E+01 |  |  |
| 8126402 | NM_033502    | TRERF1    | transcriptional regulating factor 1                                           | 0.093  | 1.066 | 3.27E-01 | 3.27E+01 |  |  |
| 8126428 | NM_033502    | TRERF1    | transcriptional regulating factor 1                                           | 0.182  | 1.135 | 4.04E-01 | 4.04E+01 |  |  |
| 8126436 | NM_000322    | PRPH2     | peripherin 2 (retinal degeneration)                                           | -0.055 | 0.962 | 7.08E-01 | 7.08E+01 |  |  |
| 8126442 | NM_003192    | TBCC      | tubulin folding cofactor C                                                    | -0.093 | 0.938 | 4.97E-01 | 4.97E+01 |  |  |
| 8126446 | NM_00100873  | C6orf226  | chromosome 6 open reading frame 226                                           | 0.004  | 1.003 | 9.90E-01 | 9.90E+01 |  |  |
| 8126450 | NM_000986    | RPL24     | ribosomal protein L24                                                         | -0.002 | 0.999 | 9.91E-01 | 9.91E+01 |  |  |
| 8126452 | NM_000287    | PEX6      | peroxisomal biogenesis factor 6                                               | -0.061 | 0.959 | 4.27E-01 | 4.27E+01 |  |  |
| 8126474 | NM_014623    | MEA1      | male-enhanced antigen 1                                                       | -0.097 | 0.935 | 3.21E-01 | 3.21E+01 |  |  |
| 8126482 | ---          | ---       | ---                                                                           | 0.095  | 1.068 | 2.82E-01 | 2.82E+01 |  |  |
| 8126484 | ---          | ---       | ---                                                                           | -0.092 | 0.938 | 3.41E-01 | 3.41E+01 |  |  |
| 8126486 | NM_014780    | CUL7      | cullin 7                                                                      | 0.012  | 1.008 | 9.52E-01 | 9.52E+01 |  |  |
| 8126512 | NM_015950    | MRPL2     | mitochondrial ribosomal protein L2                                            | -0.008 | 0.994 | 9.76E-01 | 9.76E+01 |  |  |
| 8126524 | NM_199184    | C6orf108  | chromosome 6 open reading frame 108                                           | -0.091 | 0.939 | 3.61E-01 | 3.61E+01 |  |  |
| 8126531 | NM_206922    | CRIP3     | cysteine-rich protein 3                                                       | -0.008 | 0.995 | 9.64E-01 | 9.64E+01 |  |  |
| 8126542 | NM_014345    | ZNF318    | zinc finger protein 318                                                       | 0.034  | 1.024 | 8.59E-01 | 8.59E+01 |  |  |
| 8126556 | NM_023932    | DLK2      | delta-like 2 homolog (Drosophila)                                             | -0.053 | 0.964 | 5.94E-01 | 5.94E+01 |  |  |
| 8126574 | NM_015388    | YIPF3     | Yip1 domain family, member 3                                                  | -0.040 | 0.973 | 7.94E-01 | 7.94E+01 |  |  |
| 8126588 | NM_020750    | XPO5      | exportin 5                                                                    | -0.007 | 0.995 | 9.77E-01 | 9.77E+01 |  |  |
| 8126629 | NM_019096    | GTPBP2    | GTP binding protein 2                                                         | -0.100 | 0.933 | 1.65E-01 | 1.65E+01 |  |  |
| 8126646 | NM_018135    | MRPS18A   | mitochondrial ribosomal protein S18                                           | 0.021  | 1.015 | 9.36E-01 | 9.36E+01 |  |  |
| 8126653 | NM_032111    | MRPL14    | mitochondrial ribosomal protein L14                                           | -0.062 | 0.958 | 5.80E-01 | 5.80E+01 |  |  |
| 8126658 | NM_178148    | SLC35B2   | solute carrier family 35, member B2                                           | -0.011 | 0.992 | 9.47E-01 | 9.47E+01 |  |  |
| 8126666 | NM_004556    | NFKBIE    | nuclear factor of kappa light polypeptide chain enhancer of B-cells 1 epsilon | -0.035 | 0.976 | 7.69E-01 | 7.69E+01 |  |  |
| 8126681 | NM_020745    | AARS2     | alanyl-tRNA synthetase 2, mitochondrial                                       | 0.065  | 1.046 | 5.12E-01 | 5.12E+01 |  |  |
| 8126705 | ---          | ---       | ---                                                                           | 0.262  | 1.199 | 3.41E-02 | 3.41E+00 |  |  |
| 8126729 | NM_00111408  | CLIC5     | chloride intracellular channel 5                                              | -0.207 | 0.867 | 1.45E-01 | 1.45E+01 |  |  |
| 8126760 | NM_005822    | RCAN2     | regulator of calcineurin 2                                                    | 0.019  | 1.013 | 9.56E-01 | 9.56E+01 |  |  |
| 8126839 | NM_014452    | TNFRSF21  | tumor necrosis factor receptor superfamily member 21                          | -0.020 | 0.986 | 9.56E-01 | 9.56E+01 |  |  |
| 8126855 | NM_00101373  | C6orf138  | chromosome 6 open reading frame 138                                           | 0.058  | 1.041 | 5.76E-01 | 5.76E+01 |  |  |
| 8126860 | NM_000255    | MUT       | methylmalonyl Coenzyme A mutase                                               | 0.084  | 1.060 | 5.88E-01 | 5.88E+01 |  |  |
| 8126948 | J04755       | FTHP1     | ferritin, heavy polypeptide pseudogene                                        | 0.039  | 1.027 | 8.03E-01 | 8.03E+01 |  |  |
| 8126952 | NM_004906    | WTAP      | Wilms tumor 1 associated protein                                              | -0.160 | 0.895 | 4.83E-02 | 4.83E+00 |  |  |
| 8127024 | NM_052872    | IL17F     | interleukin 17F                                                               | -0.124 | 0.918 | 6.66E-01 | 6.66E+01 |  |  |
| 8127031 | NM_002388    | MCM3      | minichromosome maintenance complex component 3                                | 0.103  | 1.074 | 5.13E-01 | 5.13E+01 |  |  |
| 8127051 | NM_012288    | TRAM2     | translocation associated membrane protein 2                                   | 0.090  | 1.064 | 4.04E-01 | 4.04E+01 |  |  |
| 8127107 | ---          | ---       | ---                                                                           | -0.214 | 0.862 | 6.11E-01 | 6.11E+01 |  |  |
| 8127109 | NM_016513    | ICK       | intestinal cell (MAK-like) kinase                                             | 0.021  | 1.015 | 9.38E-01 | 9.38E+01 |  |  |
| 8127128 | NM_033480    | FBXO9     | F-box protein 9                                                               | -0.045 | 0.969 | 6.34E-01 | 6.34E+01 |  |  |
| 8127145 | NM_021814    | ELOVL5    | ELOVL family member 5, elongation factor                                      | 0.088  | 1.063 | 5.43E-01 | 5.43E+01 |  |  |
| 8127158 | NM_001498    | GCLC      | glutamate-cysteine ligase, catalytic subunit                                  | 0.307  | 1.237 | 1.23E-01 | 1.23E+01 |  |  |
| 8127360 | ---          | ---       | ---                                                                           | -0.172 | 0.888 | 2.94E-01 | 2.94E+01 |  |  |
| 8127364 | NR_003660    | GUSBL2    | glucuronidase, beta-like 2                                                    | 0.024  | 1.017 | 9.44E-01 | 9.44E+01 |  |  |
| 8127419 | ---          | ---       | ---                                                                           | 0.002  | 1.001 | 9.94E-01 | 9.94E+01 |  |  |
| 8127423 | ---          | ---       | ---                                                                           | -0.271 | 0.829 | 1.02E-01 | 1.02E+01 |  |  |
| 8127425 | NM_018368    | LMBRD1    | LMBR1 domain containing 1                                                     | 0.049  | 1.034 | 7.63E-01 | 7.63E+01 |  |  |
| 8127446 | NM_001851    | COL9A1    | collagen, type IX, alpha 1                                                    | 0.023  | 1.016 | 8.72E-01 | 8.72E+01 |  |  |
| 8127484 | NM_080742    | B3GAT2    | beta-1,3-glucuronyltransferase 2 (beta-1,3-glucuronidase)                     | -0.041 | 0.972 | 7.55E-01 | 7.55E+01 |  |  |
| 8127526 | NM_001000    | RPL39     | ribosomal protein L39                                                         | -0.004 | 0.997 | 9.83E-01 | 9.83E+01 |  |  |



|         |             |          |                                              |        |       |          |          |  |  |
|---------|-------------|----------|----------------------------------------------|--------|-------|----------|----------|--|--|
| 8127532 | ---         | ---      | ---                                          | 0.033  | 1.023 | 8.57E-01 | 8.57E+01 |  |  |
| 8127534 | NM_138441   | C6orf150 | chromosome 6 open reading frame              | 0.140  | 1.102 | 6.61E-01 | 6.61E+01 |  |  |
| 8127542 | ---         | ---      | ---                                          | 0.086  | 1.061 | 7.64E-01 | 7.64E+01 |  |  |
| 8127544 | NM_001402   | EEF1A1   | eukaryotic translation elongation factor     | 0.000  | 1.000 | 1.00E+00 | 1.00E+02 |  |  |
| 8127549 | NM_012434   | SLC17A5  | solute carrier family 17 (anion/sugar)       | 0.171  | 1.126 | 3.70E-01 | 3.70E+01 |  |  |
| 8127629 | NM_001865   | COX7A2   | cytochrome c oxidase subunit VIIa            | 0.026  | 1.018 | 8.78E-01 | 8.78E+01 |  |  |
| 8127637 | NM_018247   | TMEM30A  | transmembrane protein 30A                    | 0.076  | 1.054 | 6.74E-01 | 6.74E+01 |  |  |
| 8127658 | ---         | ---      | ---                                          | -0.050 | 0.966 | 6.99E-01 | 6.99E+01 |  |  |
| 8127660 | ---         | ---      | ---                                          | -0.075 | 0.949 | 7.72E-01 | 7.72E+01 |  |  |
| 8127692 | NM_000863   | HTR1B    | 5-hydroxytryptamine (serotonin) receptor     | 0.031  | 1.021 | 8.14E-01 | 8.14E+01 |  |  |
| 8127698 | NM_017934   | PHIP     | pleckstrin homology domain interacting       | -0.034 | 0.977 | 7.64E-01 | 7.64E+01 |  |  |
| 8127743 | NM_004242   | HMGN3    | high mobility group nucleosomal binding      | 0.032  | 1.022 | 8.51E-01 | 8.51E+01 |  |  |
| 8127778 | NM_017633   | FAM46A   | family with sequence similarity 46           | 0.120  | 1.086 | 3.41E-01 | 3.41E+01 |  |  |
| 8127787 | NM_015525   | IBTK     | inhibitor of Bruton agammaglobulinemia       | 0.154  | 1.112 | 2.26E-01 | 2.26E+01 |  |  |
| 8127822 | ---         | ---      | ---                                          | 0.153  | 1.111 | 1.94E-01 | 1.94E+01 |  |  |
| 8127824 | NM_198920   | UBE2CBP  | ubiquitin-conjugating enzyme E2C             | 0.043  | 1.030 | 8.47E-01 | 8.47E+01 |  |  |
| 8127943 | NM_153816   | SNX14    | sorting nexin 14                             | 0.093  | 1.066 | 5.02E-01 | 5.02E+01 |  |  |
| 8127977 | NM_00115967 | SYNCRIP  | synaptotagmin binding, cytoplasmic           | 0.052  | 1.036 | 5.74E-01 | 5.74E+01 |  |  |
| 8127987 | NR_002743   | SNORD50A | small nucleolar RNA, C/D box 50A             | -0.108 | 0.928 | 5.26E-01 | 5.26E+01 |  |  |
| 8127989 | NR_003044   | SNORD50B | small nucleolar RNA, C/D box 50B             | -0.218 | 0.860 | 3.42E-01 | 3.42E+01 |  |  |
| 8128013 | NM_020320   | RARS2    | arginyl-tRNA synthetase 2, mitochondrial     | 0.068  | 1.048 | 5.98E-01 | 5.98E+01 |  |  |
| 8128034 | NM_018064   | AKIRIN2  | akirin 2                                     | 0.176  | 1.130 | 1.64E-01 | 1.64E+01 |  |  |
| 8128052 | NM_003800   | RNGTT    | RNA guanylyltransferase and 5'-phosphatase   | -0.035 | 0.976 | 8.69E-01 | 8.69E+01 |  |  |
| 8128075 | ---         | ---      | ---                                          | 0.067  | 1.048 | 9.00E-01 | 9.00E+01 |  |  |
| 8128079 | NM_080743   | SRp35    | serine-arginine repressor protein            | -0.126 | 0.917 | 3.65E-01 | 3.65E+01 |  |  |
| 8128099 | NM_002043   | GABRR2   | gamma-aminobutyric acid (GABA) receptor      | 0.004  | 1.003 | 9.86E-01 | 9.86E+01 |  |  |
| 8128111 | NM_016021   | UBE2J1   | ubiquitin-conjugating enzyme E2, J1          | 0.309  | 1.239 | 5.36E-02 | 5.36E+00 |  |  |
| 8128133 | NM_020466   | LYRM2    | LYR motif containing 2                       | 0.020  | 1.014 | 9.19E-01 | 9.19E+01 |  |  |
| 8128138 | NM_014611   | MDN1     | MDN1, midasin homolog (yeast)                | -0.018 | 0.988 | 9.27E-01 | 9.27E+01 |  |  |
| 8128247 | NM_021813   | BACH2    | BTB and CNC homology 1, basic leucine        | -0.045 | 0.969 | 8.43E-01 | 8.43E+01 |  |  |
| 8128258 | ---         | ---      | ---                                          | 0.051  | 1.036 | 7.99E-01 | 7.99E+01 |  |  |
| 8128260 | NM_145331   | MAP3K7   | mitogen-activated protein kinase 7           | 0.051  | 1.036 | 6.72E-01 | 6.72E+01 |  |  |
| 8128312 | ---         | ---      | ---                                          | -0.040 | 0.972 | 7.05E-01 | 7.05E+01 |  |  |
| 8128322 | NM_014165   | NDUFAF4  | NADH dehydrogenase (ubiquinone) F4           | 0.010  | 1.007 | 9.83E-01 | 9.83E+01 |  |  |
| 8128356 | NM_012160   | FBXL4    | F-box and leucine-rich repeat protein        | 0.092  | 1.066 | 5.53E-01 | 5.53E+01 |  |  |
| 8128371 | NM_032511   | C6orf168 | chromosome 6 open reading frame              | 0.009  | 1.006 | 9.64E-01 | 9.64E+01 |  |  |
| 8128394 | NM_032870   | SFRS18   | splicing factor, arginine/serine-rich 18     | -0.005 | 0.997 | 9.77E-01 | 9.77E+01 |  |  |
| 8128429 | NM_005190   | CCNC     | cyclin C                                     | 0.052  | 1.037 | 7.48E-01 | 7.48E+01 |  |  |
| 8128472 | NM_006828   | ASCC3    | activating signal cointegrator 1 co-receptor | 0.078  | 1.056 | 4.90E-01 | 4.90E+01 |  |  |
| 8128522 | NM_020771   | HACE1    | HECT domain and ankyrin repeat domain        | -0.001 | 0.999 | 9.98E-01 | 9.98E+01 |  |  |
| 8128549 | ---         | ---      | ---                                          | 0.026  | 1.018 | 9.36E-01 | 9.36E+01 |  |  |
| 8128572 | NM_002726   | PREP     | prolyl endopeptidase                         | 0.065  | 1.046 | 7.31E-01 | 7.31E+01 |  |  |
| 8128592 | NM_004849   | ATG5     | ATG5 autophagy related 5 homolog             | -0.002 | 0.998 | 9.90E-01 | 9.90E+01 |  |  |
| 8128604 | ---         | ---      | ---                                          | 0.064  | 1.045 | 8.69E-01 | 8.69E+01 |  |  |
| 8128606 | NM_032730   | RTN4IP1  | reticulon 4 interacting protein 1            | 0.238  | 1.179 | 1.06E-01 | 1.06E+01 |  |  |
| 8128620 | NM_00108045 | BEND3    | BEN domain containing 3                      | -0.017 | 0.988 | 9.34E-01 | 9.34E+01 |  |  |
| 8128638 | NM_198081   | SCML4    | sex comb on midleg-like 4 (Drosophila)       | 0.064  | 1.045 | 6.83E-01 | 6.83E+01 |  |  |
| 8128650 | NM_007214   | SEC63    | SEC63 homolog (S. cerevisiae)                | 0.118  | 1.085 | 1.98E-01 | 1.98E+01 |  |  |
| 8128667 | ---         | ---      | ---                                          | -0.128 | 0.915 | 1.85E-01 | 1.85E+01 |  |  |
| 8128669 | NM_014028   | OSTM1    | osteopetrosis associated transmembrane       | 0.167  | 1.123 | 2.00E-01 | 2.00E+01 |  |  |
| 8128683 | NM_003795   | SNX3     | sorting nexin 3                              | 0.095  | 1.068 | 4.12E-01 | 4.12E+01 |  |  |
| 8128698 | NM_014454   | SESN1    | sestrin 1                                    | -0.028 | 0.981 | 9.01E-01 | 9.01E+01 |  |  |
| 8128712 | ---         | ---      | ---                                          | 0.074  | 1.053 | 7.01E-01 | 7.01E+01 |  |  |
| 8128716 | NM_006016   | CD164    | CD164 molecule, sialomucin                   | 0.184  | 1.136 | 1.23E-01 | 1.23E+01 |  |  |
| 8128737 | NM_022765   | MICAL1   | microtubule associated monooxygenase         | 0.045  | 1.032 | 6.76E-01 | 6.76E+01 |  |  |
| 8128767 | NM_014797   | ZBTB24   | zinc finger and BTB domain containing        | -0.022 | 0.985 | 9.28E-01 | 9.28E+01 |  |  |
| 8128867 | NM_015076   | CDC2L6   | cell division cycle 2-like 6 (CDK8-like)     | 0.040  | 1.028 | 8.45E-01 | 8.45E+01 |  |  |
| 8128886 | ---         | ---      | ---                                          | 0.234  | 1.176 | 4.01E-01 | 4.01E+01 |  |  |
| 8128892 | ---         | ---      | ---                                          | -0.407 | 0.754 | 1.20E-01 | 1.20E+01 |  |  |
| 8128894 | NM_002912   | REV3L    | REV3-like, catalytic subunit of DNA          | -0.037 | 0.975 | 8.53E-01 | 8.53E+01 |  |  |
| 8128939 | NM_147686   | TRAF3IP2 | TRAF3 interacting protein 2                  | -0.261 | 0.834 | 9.91E-03 | 9.91E-01 |  |  |
| 8128956 | NM_002037   | FYN      | FYN oncogene related to SRC, FGR             | -0.241 | 0.846 | 4.78E-02 | 4.78E+00 |  |  |
| 8129037 | ---         | ---      | ---                                          | 0.023  | 1.016 | 9.09E-01 | 9.09E+01 |  |  |
| 8129045 | NM_001527   | HDAC2    | histone deacetylase 2                        | 0.017  | 1.012 | 9.11E-01 | 9.11E+01 |  |  |
| 8129069 | ---         | ---      | ---                                          | 0.118  | 1.085 | 7.98E-01 | 7.98E+01 |  |  |
| 8129082 | NM_000493   | COL10A1  | collagen, type X, alpha 1                    | -0.033 | 0.978 | 7.78E-01 | 7.78E+01 |  |  |
| 8129087 | ---         | ---      | ---                                          | 0.085  | 1.060 | 8.75E-01 | 8.75E+01 |  |  |
| 8129089 | NM_021648   | TSPYL4   | TSPY-like 4                                  | -0.128 | 0.915 | 9.29E-02 | 9.29E+00 |  |  |
| 8129095 | ---         | ---      | ---                                          | -0.060 | 0.960 | 8.16E-01 | 8.16E+01 |  |  |
| 8129099 | NM_003309   | TSPYL1   | TSPY-like 1                                  | -0.070 | 0.952 | 5.90E-01 | 5.90E+01 |  |  |
| 8129120 | NM_00108548 | FAM162B  | family with sequence similarity 16           | -0.005 | 0.997 | 9.77E-01 | 9.77E+01 |  |  |
| 8129181 | NM_020399   | GOPC     | golgi associated PDZ and coiled-coil         | 0.039  | 1.027 | 7.94E-01 | 7.94E+01 |  |  |
| 8129193 | NM_00104247 | C6orf204 | chromosome 6 open reading frame              | 0.107  | 1.077 | 5.01E-01 | 5.01E+01 |  |  |
| 8129214 | AK299076    | MCM9     | minichromosome maintenance complex           | -0.080 | 0.946 | 8.45E-01 | 8.45E+01 |  |  |
| 8129218 | NM_153255   | MCM9     | minichromosome maintenance complex           | -0.044 | 0.970 | 8.18E-01 | 8.18E+01 |  |  |
| 8129231 | NM_024581   | FAM184A  | family with sequence similarity 18           | 0.216  | 1.161 | 4.43E-01 | 4.43E+01 |  |  |
| 8129317 | NM_020755   | SERINC1  | serine incorporator 1                        | 0.006  | 1.004 | 9.83E-01 | 9.83E+01 |  |  |

|         |             |          |                                     |        |       |          |          |  |  |
|---------|-------------|----------|-------------------------------------|--------|-------|----------|----------|--|--|
| 8129363 | NM_016063   | HDDC2    | HD domain containing 2              | -0.118 | 0.921 | 5.28E-01 | 5.28E+01 |  |  |
| 8129375 | ---         | ---      | ---                                 | -0.004 | 0.997 | 9.85E-01 | 9.85E+01 |  |  |
| 8129377 | ---         | ---      | ---                                 | -0.004 | 0.997 | 9.84E-01 | 9.84E+01 |  |  |
| 8129379 | NM_00100203 | ECHDC1   | enoyl Coenzyme A hydratase dom      | 0.098  | 1.070 | 3.19E-01 | 3.19E+01 |  |  |
| 8129390 | ---         | ---      | ---                                 | -0.028 | 0.981 | 9.29E-01 | 9.29E+01 |  |  |
| 8129410 | NM_00101092 | THEMIS   | thymocyte selection associated      | 0.027  | 1.019 | 9.51E-01 | 9.51E+01 |  |  |
| 8129454 | ---         | ---      | ---                                 | 0.034  | 1.024 | 8.32E-01 | 8.32E+01 |  |  |
| 8129482 | NM_00101737 | SAMD3    | sterile alpha motif domain contain  | 0.077  | 1.055 | 8.96E-01 | 8.96E+01 |  |  |
| 8129497 | NM_001431   | EPB41L2  | erythrocyte membrane protein ba     | -0.179 | 0.883 | 2.84E-01 | 2.84E+01 |  |  |
| 8129522 | NM_004830   | MED23    | mediator complex subunit 23         | 0.000  | 1.000 | 1.00E+00 | 1.00E+02 |  |  |
| 8129562 | NM_001901   | CTGF     | connective tissue growth factor     | 0.027  | 1.019 | 8.57E-01 | 8.57E+01 |  |  |
| 8129590 | NM_003569   | STX7     | syntaxin 7                          | 0.300  | 1.231 | 1.01E-02 | 1.01E+00 |  |  |
| 8129637 | NM_004665   | VNN2     | vanin 2                             | -0.240 | 0.847 | 4.48E-01 | 4.48E+01 |  |  |
| 8129649 | NM_052831   | C6orf192 | chromosome 6 open reading fram      | 0.026  | 1.018 | 9.24E-01 | 9.24E+01 |  |  |
| 8129675 | ---         | ---      | ---                                 | -0.062 | 0.958 | 6.66E-01 | 6.66E+01 |  |  |
| 8129695 | NM_022568   | ALDH8A1  | aldehyde dehydrogenase 8 family,    | -0.057 | 0.961 | 7.25E-01 | 7.25E+01 |  |  |
| 8129706 | NM_006620   | HBS1L    | HBS1-like (S. cerevisiae)           | -0.050 | 0.966 | 7.83E-01 | 7.83E+01 |  |  |
| 8129773 | NM_014739   | BCLAF1   | BCL2-associated transcription fact  | -0.022 | 0.985 | 8.76E-01 | 8.76E+01 |  |  |
| 8129783 | NM_003980   | MAP7     | microtubule-associated protein 7    | 0.090  | 1.065 | 4.26E-01 | 4.26E+01 |  |  |
| 8129804 | NM_005923   | MAP3K5   | mitogen-activated protein kinase    | -0.037 | 0.975 | 8.40E-01 | 8.40E+01 |  |  |
| 8129861 | NM_000416   | IFNGR1   | interferon gamma receptor 1         | 0.236  | 1.177 | 4.18E-01 | 4.18E+01 |  |  |
| 8129880 | NM_022121   | PERP     | PERP, TP53 apoptosis effector       | -0.193 | 0.875 | 5.73E-02 | 5.73E+00 |  |  |
| 8129901 | NM_031922   | REPS1    | RALBP1 associated Eps domain co     | -0.019 | 0.987 | 9.33E-01 | 9.33E+01 |  |  |
| 8129924 | NM_153235   | TXLNB    | taxilin beta                        | 0.054  | 1.038 | 8.49E-01 | 8.49E+01 |  |  |
| 8129937 | NM_006079   | CITED2   | Cbp/p300-interacting transactivat   | -0.069 | 0.954 | 4.49E-01 | 4.49E+01 |  |  |
| 8129953 | NM_006734   | HIVEP2   | human immunodeficiency virus ty     | -0.199 | 0.871 | 8.62E-02 | 8.62E+00 |  |  |
| 8129963 | NM_182503   | ADAT2    | adenosine deaminase, tRNA-speci     | 0.196  | 1.145 | 2.99E-01 | 2.99E+01 |  |  |
| 8129985 | NM_006718   | PLAGL1   | pleiomorphic adenoma gene-like 1    | 0.227  | 1.171 | 1.36E-02 | 1.36E+00 |  |  |
| 8130003 | NM_031287   | SF3B5    | splicing factor 3b, subunit 5, 10kD | -0.008 | 0.994 | 9.77E-01 | 9.77E+01 |  |  |
| 8130009 | ---         | ---      | ---                                 | 0.080  | 1.057 | 6.80E-01 | 6.80E+01 |  |  |
| 8130013 | NM_005670   | EPM2A    | epilepsy, progressive myoclonus t   | -0.033 | 0.978 | 8.73E-01 | 8.73E+01 |  |  |
| 8130032 | NM_032145   | FBXO30   | F-box protein 30                    | -0.025 | 0.983 | 9.05E-01 | 9.05E+01 |  |  |
| 8130038 | NM_00104268 | SHPRH    | SNF2 histone linker PHD RING heli   | 0.040  | 1.028 | 8.05E-01 | 8.05E+01 |  |  |
| 8130071 | NM_024713   | C15orf29 | chromosome 15 open reading fram     | 0.030  | 1.021 | 9.33E-01 | 9.33E+01 |  |  |
| 8130073 | NM_207360   | ZC3H12D  | zinc finger CCCH-type containing 1  | -0.060 | 0.960 | 5.29E-01 | 5.29E+01 |  |  |
| 8130087 | NM_139126   | PPIL4    | peptidylprolyl isomerase (cyclophi  | -0.006 | 0.996 | 9.77E-01 | 9.77E+01 |  |  |
| 8130102 | NM_007044   | KATNA1   | katanin p60 (ATPase-containing) s   | 0.083  | 1.059 | 5.57E-01 | 5.57E+01 |  |  |
| 8130116 | NM_004690   | LATS1    | LATS, large tumor suppressor, hom   | 0.003  | 1.002 | 9.86E-01 | 9.86E+01 |  |  |
| 8130129 | NM_198887   | NUP43    | nucleoporin 43kDa                   | 0.064  | 1.045 | 7.56E-01 | 7.56E+01 |  |  |
| 8130142 | NM_032832   | LRP11    | low density lipoprotein receptor-r  | -0.044 | 0.970 | 6.81E-01 | 6.81E+01 |  |  |
| 8130163 | NM_00100178 | RAET1G   | retinoic acid early transcript 1G   | -0.054 | 0.963 | 6.92E-01 | 6.92E+01 |  |  |
| 8130173 | NM_130900   | RAET1L   | retinoic acid early transcript 1L   | -0.087 | 0.942 | 3.72E-01 | 3.72E+01 |  |  |
| 8130176 | NM_024518   | ULBP3    | UL16 binding protein 3              | 0.083  | 1.059 | 4.99E-01 | 4.99E+01 |  |  |
| 8130185 | NM_020861   | ZBTB2    | zinc finger and BTB domain contai   | -0.032 | 0.978 | 8.92E-01 | 8.92E+01 |  |  |
| 8130211 | NM_182961   | SYNE1    | spectrin repeat containing, nuclea  | 0.015  | 1.010 | 9.74E-01 | 9.74E+01 |  |  |
| 8130383 | NM_019041   | MTRF1L   | mitochondrial translational releas  | 0.051  | 1.036 | 6.34E-01 | 6.34E+01 |  |  |
| 8130394 | NM_012419   | RGS17    | regulator of G-protein signaling 17 | -0.059 | 0.960 | 7.15E-01 | 7.15E+01 |  |  |
| 8130403 | ---         | ---      | ---                                 | 0.015  | 1.011 | 9.22E-01 | 9.22E+01 |  |  |
| 8130408 | NM_00113070 | IPCEF1   | interaction protein for cytohesin e | -0.034 | 0.977 | 9.13E-01 | 9.13E+01 |  |  |
| 8130436 | ---         | ---      | ---                                 | 0.051  | 1.036 | 8.31E-01 | 8.31E+01 |  |  |
| 8130438 | NM_016020   | TFB1M    | transcription factor B1, mitochond  | 0.055  | 1.039 | 8.53E-01 | 8.53E+01 |  |  |
| 8130464 | NM_018452   | C6orf35  | chromosome 6 open reading fram      | 0.015  | 1.010 | 9.63E-01 | 9.63E+01 |  |  |
| 8130470 | ---         | ---      | ---                                 | -0.023 | 0.984 | 8.96E-01 | 8.96E+01 |  |  |
| 8130474 | NM_032861   | SERAC1   | serine active site containing 1     | 0.027  | 1.019 | 8.96E-01 | 8.96E+01 |  |  |
| 8130499 | NM_006519   | DYNLT1   | dynein, light chain, Tctex-type 1   | 0.162  | 1.119 | 3.84E-01 | 3.84E+01 |  |  |
| 8130505 | NM_003379   | EZR      | ezrin                               | -0.153 | 0.899 | 8.43E-02 | 8.43E+00 |  |  |
| 8130528 | NM_031924   | RSPH3    | radial spoke 3 homolog (Chlamydo    | 0.026  | 1.018 | 9.12E-01 | 9.12E+01 |  |  |
| 8130539 | NM_054114   | TAGAP    | T-cell activation RhoGTPase activa  | 0.171  | 1.126 | 8.43E-02 | 8.43E+00 |  |  |
| 8130553 | AK130765    | FLJ27255 | hypothetical LOC401281              | -0.112 | 0.925 | 7.29E-01 | 7.29E+01 |  |  |
| 8130565 | ---         | ---      | ---                                 | -0.129 | 0.914 | 6.48E-01 | 6.48E+01 |  |  |
| 8130567 | NM_030752   | TCP1     | t-complex 1                         | -0.040 | 0.972 | 8.06E-01 | 8.06E+01 |  |  |
| 8130578 | NR_002960   | SNORA20  | small nucleolar RNA, H/ACA box 2    | 0.230  | 1.173 | 4.70E-01 | 4.70E+01 |  |  |
| 8130580 | NR_002965   | SNORA29  | small nucleolar RNA, H/ACA box 2    | 0.070  | 1.050 | 9.13E-01 | 9.13E+01 |  |  |
| 8130622 | ---         | ---      | ---                                 | 0.001  | 1.001 | 9.98E-01 | 9.98E+01 |  |  |
| 8130624 | NM_005922   | MAP3K4   | mitogen-activated protein kinase    | -0.010 | 0.993 | 9.54E-01 | 9.54E+01 |  |  |
| 8130626 | ---         | ---      | ---                                 | -0.196 | 0.873 | 4.07E-01 | 4.07E+01 |  |  |
| 8130660 | ---         | ---      | ---                                 | 0.116  | 1.084 | 7.98E-01 | 7.98E+01 |  |  |
| 8130703 | NM_003181   | T        | T, brachyury homolog (mouse)        | -0.021 | 0.986 | 8.96E-01 | 8.96E+01 |  |  |
| 8130715 | NM_175922   | PRR18    | proline rich 18                     | -0.084 | 0.944 | 2.99E-01 | 2.99E+01 |  |  |
| 8130720 | NM_145169   | SFT2D1   | SFT2 domain containing 1            | 0.264  | 1.200 | 8.70E-02 | 8.70E+00 |  |  |
| 8130732 | NM_016098   | BRP44L   | brain protein 44-like               | 0.073  | 1.052 | 6.48E-01 | 6.48E+01 |  |  |
| 8130739 | NM_021135   | RPS6KA2  | ribosomal protein S6 kinase, 90kD   | 0.176  | 1.130 | 1.98E-01 | 1.98E+01 |  |  |
| 8130765 | BC112329    | FAM103A1 | family with sequence similarity 10  | 0.046  | 1.032 | 6.26E-01 | 6.26E+01 |  |  |
| 8130768 | NM_003730   | RNASET2  | ribonuclease T2                     | 0.112  | 1.080 | 5.15E-01 | 5.15E+01 |  |  |
| 8130783 | AK000385    | RNASET2  | ribonuclease T2                     | 0.043  | 1.030 | 8.30E-01 | 8.30E+01 |  |  |
| 8130785 | NM_005299   | GPR31    | G protein-coupled receptor 31       | -0.080 | 0.946 | 5.15E-01 | 5.15E+01 |  |  |
| 8130824 | AB016902    | HGC6.3   | similar to HGC6.3                   | -0.038 | 0.974 | 8.04E-01 | 8.04E+01 |  |  |

|         |              |              |                                      |        |       |          |          |  |  |
|---------|--------------|--------------|--------------------------------------|--------|-------|----------|----------|--|--|
| 8130827 | AB016899     | C6orf54      | chromosome 6 open reading fram       | -0.038 | 0.974 | 7.78E-01 | 7.78E+01 |  |  |
| 8130859 | NM_214462    | DACT2        | dapper, antagonist of beta-catenin   | -0.044 | 0.970 | 6.85E-01 | 6.85E+01 |  |  |
| 8130867 | NM_003247    | THBS2        | thrombospondin 2                     | -0.048 | 0.967 | 7.02E-01 | 7.02E+01 |  |  |
| 8130891 | NM_182552    | WDR27        | WD repeat domain 27                  | 0.048  | 1.034 | 8.13E-01 | 8.13E+01 |  |  |
| 8130916 | NM_018288    | PHF10        | PHD finger protein 10                | -0.044 | 0.970 | 8.18E-01 | 8.18E+01 |  |  |
| 8130939 | NM_005618    | DLL1         | delta-like 1 (Drosophila)            | -0.102 | 0.931 | 3.02E-01 | 3.02E+01 |  |  |
| 8130952 | NM_002793    | PSMB1        | proteasome (prosome, macropain       | -0.023 | 0.984 | 8.75E-01 | 8.75E+01 |  |  |
| 8130962 | NM_002598    | PDCD2        | programmed cell death 2              | -0.020 | 0.986 | 8.52E-01 | 8.52E+01 |  |  |
| 8130988 | NM_018452    | C6orf35      | chromosome 6 open reading fram       | 0.030  | 1.021 | 9.11E-01 | 9.11E+01 |  |  |
| 8130993 | NM_020223    | FAM20C       | family with sequence similarity 20   | 0.189  | 1.140 | 2.50E-01 | 2.50E+01 |  |  |
| 8130997 | BC109246     | PDGFA        | platelet-derived growth factor alp   | -0.031 | 0.979 | 8.08E-01 | 8.08E+01 |  |  |
| 8131000 | NM_017802    | HEATR2       | HEAT repeat containing 2             | -0.044 | 0.970 | 7.07E-01 | 7.07E+01 |  |  |
| 8131013 | NM_00113096  | UNC84A       | unc-84 homolog A (C. elegans)        | -0.010 | 0.993 | 9.77E-01 | 9.77E+01 |  |  |
| 8131042 | AK126112     | FLJ44124     | hypothetical LOC641737               | 0.013  | 1.009 | 9.62E-01 | 9.62E+01 |  |  |
| 8131044 | NM_015949    | C7orf20      | chromosome 7 open reading fram       | 0.005  | 1.004 | 9.83E-01 | 9.83E+01 |  |  |
| 8131056 | NM_017781    | CYP2W1       | cytochrome P450, family 2, subfa     | -0.071 | 0.952 | 3.15E-01 | 3.15E+01 |  |  |
| 8131069 | NM_00103996  | GPGR         | G protein-coupled estrogen recept    | 0.027  | 1.019 | 8.10E-01 | 8.10E+01 |  |  |
| 8131087 | NM_00108046  | UNCX         | UNC homeobox                         | -0.006 | 0.996 | 9.71E-01 | 9.71E+01 |  |  |
| 8131091 | NM_002360    | MAFK         | v-maf musculoaponeurotic fibrosa     | -0.025 | 0.983 | 8.55E-01 | 8.55E+01 |  |  |
| 8131096 | NM_00112863  | ELFN1        | extracellular leucine-rich repeat a  | -0.028 | 0.981 | 8.31E-01 | 8.31E+01 |  |  |
| 8131098 | ENST00000402 | LOC100128374 | hypothetical LOC100128374            | -0.010 | 0.993 | 9.60E-01 | 9.60E+01 |  |  |
| 8131101 | NM_198949    | NUDT1        | nudix (nucleoside diphosphate lin    | -0.012 | 0.992 | 9.50E-01 | 9.50E+01 |  |  |
| 8131111 | NM_00103728  | EIF3B        | eukaryotic translation initiation fa | -0.029 | 0.980 | 8.70E-01 | 8.70E+01 |  |  |
| 8131135 | NM_018641    | CHST12       | carbohydrate (chondroitin 4) sulfo   | -0.036 | 0.975 | 8.41E-01 | 8.41E+01 |  |  |
| 8131140 | AK024457     | FLJ00049     | FLJ00049 protein                     | 0.044  | 1.031 | 8.16E-01 | 8.16E+01 |  |  |
| 8131155 | NM_152558    | IQCE         | IQ motif containing E                | 0.056  | 1.040 | 5.04E-01 | 5.04E+01 |  |  |
| 8131195 | NM_133463    | AMZ1         | archaelysin family metallopeptida    | -0.066 | 0.955 | 4.70E-01 | 4.70E+01 |  |  |
| 8131205 | NM_152744    | SDK1         | sidekick homolog 1, cell adhesion    | -0.006 | 0.996 | 9.74E-01 | 9.74E+01 |  |  |
| 8131253 | NM_00103716  | FOXK1        | forkhead box K1                      | -0.068 | 0.954 | 4.27E-01 | 4.27E+01 |  |  |
| 8131263 | X58060       | RNU13P2      | RNA, U13 small nuclear pseudoge      | 0.094  | 1.067 | 6.93E-01 | 6.93E+01 |  |  |
| 8131265 | NM_014855    | KIAA0415     | KIAA0415                             | 0.001  | 1.001 | 9.96E-01 | 9.96E+01 |  |  |
| 8131286 | NR_023384    | RNF216L      | ring finger protein 216-like         | -0.032 | 0.978 | 8.37E-01 | 8.37E+01 |  |  |
| 8131292 | NM_021163    | RBAK         | RB-associated KRAB zinc finger       | 0.104  | 1.075 | 5.92E-01 | 5.92E+01 |  |  |
| 8131296 | NR_015343    | LOC389458    | hypothetical LOC389458               | -0.002 | 0.999 | 9.88E-01 | 9.88E+01 |  |  |
| 8131303 | NM_015610    | WIP1         | WD repeat domain, phosphoinosit      | 0.014  | 1.010 | 9.34E-01 | 9.34E+01 |  |  |
| 8131326 | NM_00104066  | SLC29A4      | solute carrier family 29 (nucleosid  | 0.005  | 1.003 | 9.87E-01 | 9.87E+01 |  |  |
| 8131335 | ---          | ---          | ---                                  | -0.101 | 0.932 | 7.57E-01 | 7.57E+01 |  |  |
| 8131339 | NM_003088    | FSCN1        | fascin homolog 1, actin-bundling p   | -0.155 | 0.898 | 7.86E-02 | 7.86E+00 |  |  |
| 8131349 | NM_00109762  | OCM          | oncomodulin                          | -0.081 | 0.945 | 8.63E-01 | 8.63E+01 |  |  |
| 8131356 | NM_015622    | C7orf28A     | chromosome 7 open reading fram       | -0.063 | 0.957 | 4.36E-01 | 4.36E+01 |  |  |
| 8131374 | NM_006303    | AIMP2        | aminoacyl tRNA synthetase compl      | 0.077  | 1.055 | 5.52E-01 | 5.52E+01 |  |  |
| 8131379 | ---          | ---          | ---                                  | 0.029  | 1.020 | 8.31E-01 | 8.31E+01 |  |  |
| 8131385 | ---          | ---          | ---                                  | -0.187 | 0.878 | 4.06E-01 | 4.06E+01 |  |  |
| 8131387 | NM_032172    | USP42        | ubiquitin specific peptidase 42      | -0.015 | 0.989 | 9.33E-01 | 9.33E+01 |  |  |
| 8131406 | NM_018890    | RAC1         | ras-related C3 botulinum toxin sub   | 0.042  | 1.030 | 9.07E-01 | 9.07E+01 |  |  |
| 8131414 | NM_00113438  | ZDHH4        | zinc finger, DHHC-type containing    | 0.000  | 1.000 | 1.00E+00 | 1.00E+02 |  |  |
| 8131427 | BC001076     | C7orf26      | chromosome 7 open reading fram       | -0.035 | 0.976 | 8.75E-01 | 8.75E+01 |  |  |
| 8131438 | ---          | ---          | ---                                  | -0.060 | 0.960 | 6.18E-01 | 6.18E+01 |  |  |
| 8131444 | NR_002217    | PMS2CL       | PMS2 C-terminal like pseudogene      | 0.024  | 1.017 | 9.14E-01 | 9.14E+01 |  |  |
| 8131475 | NM_020156    | C1GALT1      | core 1 synthase, glycoprotein-N-ac   | 0.182  | 1.134 | 1.28E-01 | 1.28E+01 |  |  |
| 8131479 | NM_019005    | MIOS         | missing oocyte, meiosis regulator,   | 0.106  | 1.076 | 5.46E-01 | 5.46E+01 |  |  |
| 8131494 | ---          | ---          | ---                                  | 0.012  | 1.008 | 9.84E-01 | 9.84E+01 |  |  |
| 8131496 | NM_138426    | GLCC1        | glucocorticoid induced transcript 1  | -0.036 | 0.976 | 8.46E-01 | 8.46E+01 |  |  |
| 8131506 | NM_152745    | NXP1         | neurexophilin 1                      | -0.067 | 0.955 | 3.94E-01 | 3.94E+01 |  |  |
| 8131512 | ---          | ---          | ---                                  | -0.014 | 0.991 | 9.64E-01 | 9.64E+01 |  |  |
| 8131519 | NM_014660    | PHF14        | PHD finger protein 14                | -0.030 | 0.979 | 8.20E-01 | 8.20E+01 |  |  |
| 8131573 | NM_212460    | ARL4A        | ADP-ribosylation factor-like 4A      | -0.103 | 0.931 | 3.93E-01 | 3.93E+01 |  |  |
| 8131583 | NM_00115976  | BZW2         | basic leucine zipper and W2 doma     | 0.120  | 1.086 | 4.49E-01 | 4.49E+01 |  |  |
| 8131600 | NM_014399    | TSPAN13      | tetraspanin 13                       | -0.005 | 0.997 | 9.90E-01 | 9.90E+01 |  |  |
| 8131614 | NM_001621    | AHR          | aryl hydrocarbon receptor            | -0.095 | 0.936 | 7.29E-01 | 7.29E+01 |  |  |
| 8131631 | NM_178423    | HDAC9        | histone deacetylase 9                | 0.112  | 1.081 | 3.81E-01 | 3.81E+01 |  |  |
| 8131661 | NM_000982    | RPL21        | ribosomal protein L21                | -0.013 | 0.991 | 9.50E-01 | 9.50E+01 |  |  |
| 8131705 | NR_026673    | RPL23P8      | ribosomal protein L23 pseudogene     | 0.047  | 1.033 | 7.99E-01 | 7.99E+01 |  |  |
| 8131709 | NM_003112    | SP4          | Sp4 transcription factor             | 0.012  | 1.008 | 9.60E-01 | 9.60E+01 |  |  |
| 8131811 | ---          | ---          | ---                                  | -0.061 | 0.959 | 5.98E-01 | 5.98E+01 |  |  |
| 8131813 | ---          | ---          | ---                                  | -0.135 | 0.911 | 3.93E-01 | 3.93E+01 |  |  |
| 8131815 | NM_018846    | KLHL7        | kelch-like 7 (Drosophila)            | -0.076 | 0.949 | 5.98E-01 | 5.98E+01 |  |  |
| 8131831 | NM_007342    | NUPL2        | nucleoporin like 2                   | 0.098  | 1.071 | 5.06E-01 | 5.06E+01 |  |  |
| 8131860 | BC012331     | C7orf30      | chromosome 7 open reading fram       | 0.010  | 1.007 | 9.53E-01 | 9.53E+01 |  |  |
| 8131869 | NR_026676    | RPS2P32      | ribosomal protein S2 pseudogene      | -0.033 | 0.977 | 7.51E-01 | 7.51E+01 |  |  |
| 8131871 | NM_138771    | CCDC126      | coiled-coil domain containing 126    | -0.025 | 0.983 | 9.16E-01 | 9.16E+01 |  |  |
| 8131881 | NM_199136    | C7orf46      | chromosome 7 open reading fram       | 0.095  | 1.068 | 5.04E-01 | 5.04E+01 |  |  |
| 8131917 | ---          | ---          | ---                                  | -0.108 | 0.928 | 1.71E-01 | 1.71E+01 |  |  |
| 8131919 | NM_000905    | NPY          | neuropeptide Y                       | 0.125  | 1.090 | 2.82E-01 | 2.82E+01 |  |  |
| 8131927 | NM_016447    | MPP6         | membrane protein, palmitoylated      | -0.084 | 0.944 | 7.02E-01 | 7.02E+01 |  |  |
| 8131942 | ---          | ---          | ---                                  | -0.052 | 0.965 | 8.34E-01 | 8.34E+01 |  |  |
| 8131944 | NM_004289    | NFE2L3       | nuclear factor (erythroid-derived 2  | 0.030  | 1.021 | 8.74E-01 | 8.74E+01 |  |  |

|         |              |              |                                        |        |       |          |          |  |  |
|---------|--------------|--------------|----------------------------------------|--------|-------|----------|----------|--|--|
| 8131949 | NM_016587    | CBX3         | chromobox homolog 3 (HP1 gamn          | 0.029  | 1.020 | 7.78E-01 | 7.78E+01 |  |  |
| 8131957 | NM_013322    | SNX10        | sorting nexin 10                       | 0.768  | 1.703 | 1.11E-01 | 1.11E+01 |  |  |
| 8131965 | AK056484     | hCG_2009921  | hypothetical locus LOC441204           | -0.039 | 0.973 | 8.37E-01 | 8.37E+01 |  |  |
| 8131970 | NM_001989    | EVX1         | even-skipped homeobox 1                | -0.015 | 0.990 | 9.20E-01 | 9.20E+01 |  |  |
| 8131975 | NM_006024    | TAX1BP1      | Tax1 (human T-cell leukemia virus      | 0.025  | 1.018 | 8.47E-01 | 8.47E+01 |  |  |
| 8131996 | NM_182898    | CREB5        | cAMP responsive element binding        | -0.062 | 0.958 | 7.28E-01 | 7.28E+01 |  |  |
| 8132013 | NM_004067    | CHN2         | chimerin (chimaerin) 2                 | 0.260  | 1.197 | 3.04E-02 | 3.04E+00 |  |  |
| 8132031 | NM_175887    | PRR15        | proline rich 15                        | 0.012  | 1.008 | 9.27E-01 | 9.27E+01 |  |  |
| 8132036 | NM_00108052  | WIPF3        | WAS/WASL interacting protein far       | -0.019 | 0.987 | 9.25E-01 | 9.25E+01 |  |  |
| 8132043 | ---          | ---          | ---                                    | 0.076  | 1.054 | 8.40E-01 | 8.40E+01 |  |  |
| 8132045 | NM_032639    | PLEKHA8      | pleckstrin homology domain conta       | 0.047  | 1.033 | 7.75E-01 | 7.75E+01 |  |  |
| 8132055 | NM_152793    | C7orf41      | chromosome 7 open reading fram         | -0.059 | 0.960 | 7.23E-01 | 7.23E+01 |  |  |
| 8132062 | NM_147128    | ZNRF2        | zinc and ring finger 2                 | 0.006  | 1.004 | 9.78E-01 | 9.78E+01 |  |  |
| 8132070 | NM_002047    | GARS         | glycyl-tRNA synthetase                 | -0.031 | 0.978 | 8.26E-01 | 8.26E+01 |  |  |
| 8132092 | NM_006774    | INMT         | indolethylamine N-methyltransfer       | -0.035 | 0.976 | 7.36E-01 | 7.36E+01 |  |  |
| 8132097 | NM_032222    | FAM188B      | family with sequence similarity 18     | 0.021  | 1.015 | 9.07E-01 | 9.07E+01 |  |  |
| 8132130 | NM_000823    | GHRHR        | growth hormone releasing hormo         | -0.036 | 0.975 | 7.54E-01 | 7.54E+01 |  |  |
| 8132151 | NM_001118    | ADCYAP1R1    | adenylate cyclase activating polyp     | 0.059  | 1.042 | 5.51E-01 | 5.51E+01 |  |  |
| 8132188 | NM_015060    | AVL9         | AVL9 homolog (S. cerevisiae)           | 0.010  | 1.007 | 9.67E-01 | 9.67E+01 |  |  |
| 8132209 | NR_003502    | LOC441208    | zinc and ring finger 2 pseudogene      | -0.022 | 0.985 | 9.07E-01 | 9.07E+01 |  |  |
| 8132218 | NM_198428    | BB59         | Bardet-Biedl syndrome 9                | -0.140 | 0.908 | 2.68E-01 | 2.68E+01 |  |  |
| 8132243 | ---          | ---          | ---                                    | -0.278 | 0.825 | 2.91E-01 | 2.91E+01 |  |  |
| 8132248 | ---          | ---          | ---                                    | 0.020  | 1.014 | 9.56E-01 | 9.56E+01 |  |  |
| 8132290 | ---          | ---          | ---                                    | 0.003  | 1.002 | 9.90E-01 | 9.90E+01 |  |  |
| 8132292 | NM_001788    | 40428        | septin 7                               | -0.005 | 0.996 | 9.74E-01 | 9.74E+01 |  |  |
| 8132302 | ENST00000381 | PP13004      | hypothetical LOC402481                 | -0.104 | 0.930 | 2.84E-01 | 2.84E+01 |  |  |
| 8132305 | NM_030636    | EEP01        | endonuclease/exonuclease/phosp         | 0.186  | 1.138 | 1.51E-01 | 1.51E+01 |  |  |
| 8132376 | NM_032016    | STARD3NL     | STARD3 N-terminal like                 | 0.000  | 1.000 | 1.00E+00 | 1.00E+02 |  |  |
| 8132406 | NM_005402    | RALA         | v-ral simian leukemia viral oncoge     | -0.177 | 0.885 | 7.24E-02 | 7.24E+00 |  |  |
| 8132417 | NM_003718    | CDC2L5       | cell division cycle 2-like 5 (cholines | -0.071 | 0.952 | 3.81E-01 | 3.81E+01 |  |  |
| 8132458 | NM_031903    | MRPL32       | mitochondrial ribosomal protein L      | 0.000  | 1.000 | 1.00E+00 | 1.00E+02 |  |  |
| 8132501 | ---          | ---          | ---                                    | 0.016  | 1.011 | 9.77E-01 | 9.77E+01 |  |  |
| 8132503 | NM_004760    | STK17A       | serine/threonine kinase 17a            | -0.069 | 0.953 | 6.68E-01 | 6.68E+01 |  |  |
| 8132513 | ---          | ---          | ---                                    | -0.103 | 0.931 | 6.67E-01 | 6.67E+01 |  |  |
| 8132515 | NM_000712    | BLVRA        | biliverdin reductase A                 | 0.156  | 1.114 | 6.51E-01 | 6.51E+01 |  |  |
| 8132523 | NM_015983    | UBE2D4       | ubiquitin-conjugating enzyme E2D       | -0.020 | 0.986 | 9.22E-01 | 9.22E+01 |  |  |
| 8132531 | NM_175064    | SPDYE1       | speedy homolog E1 (Xenopus laevis      | 0.037  | 1.026 | 8.64E-01 | 8.64E+01 |  |  |
| 8132539 | NM_014063    | DBNL         | drebrin-like                           | 0.078  | 1.056 | 3.47E-01 | 3.47E+01 |  |  |
| 8132557 | NM_001129    | AEBP1        | AE binding protein 1                   | 0.002  | 1.002 | 9.88E-01 | 9.88E+01 |  |  |
| 8132580 | NM_006555    | YKT6         | YKT6 v-SNARE homolog (S. cerevis       | 0.028  | 1.020 | 8.93E-01 | 8.93E+01 |  |  |
| 8132589 | ---          | ---          | ---                                    | -0.016 | 0.989 | 9.52E-01 | 9.52E+01 |  |  |
| 8132592 | NM_002541    | OGDH         | oxoglutarate (alpha-ketoglutarate      | 0.060  | 1.043 | 7.08E-01 | 7.08E+01 |  |  |
| 8132617 | NM_031449    | ZMIZ2        | zinc finger, MIZ-type containing 2     | -0.070 | 0.953 | 5.01E-01 | 5.01E+01 |  |  |
| 8132642 | NM_021130    | PPIA         | peptidylprolyl isomerase A (cyclop     | 0.014  | 1.010 | 9.53E-01 | 9.53E+01 |  |  |
| 8132646 | NM_031443    | CCM2         | cerebral cavernous malformation        | 0.060  | 1.042 | 5.44E-01 | 5.44E+01 |  |  |
| 8132660 | NM_005856    | RAMP3        | receptor (G protein-coupled) activ     | -0.017 | 0.988 | 8.92E-01 | 8.92E+01 |  |  |
| 8132667 | NM_021116    | ADCY1        | adenylate cyclase 1 (brain)            | -0.064 | 0.957 | 4.57E-01 | 4.57E+01 |  |  |
| 8132694 | NM_000596    | IGFBP1       | insulin-like growth factor binding     | -0.045 | 0.969 | 7.19E-01 | 7.19E+01 |  |  |
| 8132715 | NM_00110015  | C7orf57      | chromosome 7 open reading fram         | -0.014 | 0.991 | 9.35E-01 | 9.35E+01 |  |  |
| 8132805 | NM_198570    | VWC2         | von Willebrand factor C domain co      | -0.062 | 0.958 | 4.51E-01 | 4.51E+01 |  |  |
| 8132819 | NM_006060    | IKZF1        | IKAROS family zinc finger 1 (Ikaros    | -0.010 | 0.993 | 9.76E-01 | 9.76E+01 |  |  |
| 8132830 | ---          | ---          | ---                                    | 0.137  | 1.100 | 5.50E-01 | 5.50E+01 |  |  |
| 8132832 | AK057400     | LOC100129427 | hypothetical protein LOC1001294        | 0.033  | 1.023 | 8.06E-01 | 8.06E+01 |  |  |
| 8132840 | NM_182595    | POM121L12    | POM121 membrane glycoprotein-          | -0.043 | 0.971 | 7.36E-01 | 7.36E+01 |  |  |
| 8132843 | NM_017645    | HAUS6        | HAUS augmin-like complex, subun        | -0.012 | 0.992 | 9.78E-01 | 9.78E+01 |  |  |
| 8132849 | ---          | ---          | ---                                    | -0.027 | 0.982 | 8.93E-01 | 8.93E+01 |  |  |
| 8132858 | ---          | ---          | ---                                    | 0.013  | 1.009 | 9.61E-01 | 9.61E+01 |  |  |
| 8132897 | NM_018697    | LANCL2       | LanC lantibiotic synthetase compo      | 0.018  | 1.012 | 9.49E-01 | 9.49E+01 |  |  |
| 8132909 | ---          | ---          | ---                                    | -0.058 | 0.961 | 7.52E-01 | 7.52E+01 |  |  |
| 8132911 | ---          | ---          | ---                                    | -0.063 | 0.957 | 8.37E-01 | 8.37E+01 |  |  |
| 8132922 | NM_015969    | MRP517       | mitochondrial ribosomal protein S      | 0.033  | 1.023 | 8.76E-01 | 8.76E+01 |  |  |
| 8132929 | NM_001483    | GBAS         | glioblastoma amplified sequence        | 0.088  | 1.063 | 6.01E-01 | 6.01E+01 |  |  |
| 8132943 | NM_001762    | CCT6A        | chaperonin containing TCP1, subu       | 0.026  | 1.018 | 8.97E-01 | 8.97E+01 |  |  |
| 8132964 | NM_015411    | SUMF2        | sulfatase modifying factor 2           | 0.016  | 1.011 | 9.24E-01 | 9.24E+01 |  |  |
| 8132978 | ENST00000447 | LOC100287093 | similar to Putative uncharacterize     | -0.029 | 0.980 | 8.49E-01 | 8.49E+01 |  |  |
| 8132980 | NM_00108049  | TNRC18       | trinucleotide repeat containing 18     | 0.013  | 1.009 | 9.50E-01 | 9.50E+01 |  |  |
| 8132992 | ---          | ---          | ---                                    | 0.057  | 1.040 | 7.99E-01 | 7.99E+01 |  |  |
| 8132998 | ---          | ---          | ---                                    | -0.133 | 0.912 | 6.07E-01 | 6.07E+01 |  |  |
| 8133012 | ---          | ---          | ---                                    | 0.076  | 1.054 | 7.11E-01 | 7.11E+01 |  |  |
| 8133027 | AK128836     | LOC100132217 | similar to hCG1793472                  | -0.039 | 0.973 | 5.97E-01 | 5.97E+01 |  |  |
| 8133030 | NM_002040    | GABPA        | GA binding protein transcription fa    | 0.066  | 1.047 | 6.89E-01 | 6.89E+01 |  |  |
| 8133038 | ---          | ---          | ---                                    | 0.203  | 1.151 | 5.55E-01 | 5.55E+01 |  |  |
| 8133049 | NM_016220    | ZNFI07       | zinc finger protein 107                | 0.115  | 1.083 | 5.42E-01 | 5.42E+01 |  |  |
| 8133062 | NR_003099    | ZNFI273      | zinc finger protein 273                | 0.027  | 1.019 | 9.15E-01 | 9.15E+01 |  |  |
| 8133070 | ---          | ---          | ---                                    | 0.020  | 1.014 | 9.49E-01 | 9.49E+01 |  |  |
| 8133074 | NR_027393    | INTS4L1      | integrator complex subunit 4-like      | -0.030 | 0.980 | 8.59E-01 | 8.59E+01 |  |  |
| 8133089 | NM_152626    | ZNFI92       | zinc finger protein 92                 | 0.049  | 1.034 | 7.94E-01 | 7.94E+01 |  |  |

|         |             |           |                                       |        |       |          |          |  |
|---------|-------------|-----------|---------------------------------------|--------|-------|----------|----------|--|
| 8133095 | NR_027392   | INTS4L2   | integrator complex subunit 4-like     | -0.040 | 0.972 | 7.73E-01 | 7.73E+01 |  |
| 8133114 | NM_173517   | VKORC1L1  | vitamin K epoxide reductase comp      | 0.069  | 1.049 | 7.01E-01 | 7.01E+01 |  |
| 8133119 | BC014249    | VKORC1L1  | vitamin K epoxide reductase comp      | 0.017  | 1.012 | 9.33E-01 | 9.33E+01 |  |
| 8133122 | NM_00102494 | ASL       | argininosuccinate lyase               | 0.041  | 1.029 | 7.72E-01 | 7.72E+01 |  |
| 8133145 | NM_014478   | CRCP      | CGRP receptor component               | 0.009  | 1.006 | 9.66E-01 | 9.66E+01 |  |
| 8133155 | NM_003596   | TPST1     | tyrosylprotein sulfotransferase 1     | 0.058  | 1.041 | 8.49E-01 | 8.49E+01 |  |
| 8133167 | NM_153033   | KCTD7     | potassium channel tetramerisation     | 0.053  | 1.037 | 7.68E-01 | 7.68E+01 |  |
| 8133176 | NM_014504   | RABGEF1   | RAB guanine nucleotide exchange       | -0.165 | 0.892 | 1.47E-01 | 1.47E+01 |  |
| 8133192 | NM_017994   | C7orf42   | chromosome 7 open reading fram        | 0.004  | 1.003 | 9.80E-01 | 9.80E+01 |  |
| 8133202 | NM_018264   | TYW1      | tRNA-yW synthesizing protein 1 h      | -0.085 | 0.943 | 5.46E-01 | 5.46E+01 |  |
| 8133209 | NR_003666   | SPDYE7P   | speedy homolog E7 (Xenopus lae        | 0.052  | 1.036 | 7.60E-01 | 7.60E+01 |  |
| 8133215 | NM_022906   | STAG3L4   | stromal antigen 3-like 4              | 0.065  | 1.046 | 8.91E-01 | 8.91E+01 |  |
| 8133219 | ---         | ---       | ---                                   | 0.005  | 1.004 | 9.80E-01 | 9.80E+01 |  |
| 8133221 | ---         | ---       | ---                                   | 0.159  | 1.117 | 3.87E-02 | 3.87E+00 |  |
| 8133233 | NM_015570   | AUTS2     | autism susceptibility candidate 2     | -0.311 | 0.806 | 2.72E-02 | 2.72E+00 |  |
| 8133273 | ---         | ---       | ---                                   | 0.031  | 1.021 | 8.05E-01 | 8.05E+01 |  |
| 8133275 | NM_172020   | POM121    | POM121 membrane glycoprotein          | -0.098 | 0.934 | 1.47E-01 | 1.47E+01 |  |
| 8133300 | NR_003614   | PMS2L2    | postmeiotic segregation increased     | 0.085  | 1.061 | 7.08E-01 | 7.08E+01 |  |
| 8133309 | NR_027775   | PMS2L5    | postmeiotic segregation increased     | 0.012  | 1.008 | 9.57E-01 | 9.57E+01 |  |
| 8133326 | NM_172020   | POM121    | POM121 membrane glycoprotein          | -0.133 | 0.912 | 3.52E-01 | 3.52E+01 |  |
| 8133331 | NM_172020   | POM121    | POM121 membrane glycoprotein          | -0.050 | 0.966 | 6.66E-01 | 6.66E+01 |  |
| 8133335 | NM_003508   | FZD9      | frizzled homolog 9 (Drosophila)       | -0.030 | 0.979 | 8.21E-01 | 8.21E+01 |  |
| 8133339 | NM_00107762 | VPS37D    | vacuolar protein sorting 37 homol     | -0.004 | 0.997 | 9.80E-01 | 9.80E+01 |  |
| 8133345 | NM_017528   | WBSR22    | Williams Beuren syndrome chrom        | -0.064 | 0.957 | 5.98E-01 | 5.98E+01 |  |
| 8133372 | NM_000501   | ELN       | elastin                               | -0.018 | 0.988 | 8.63E-01 | 8.63E+01 |  |
| 8133413 | NM_002314   | LIMK1     | LIM domain kinase 1                   | 0.083  | 1.059 | 4.90E-01 | 4.90E+01 |  |
| 8133434 | NM_022170   | EIF4H     | eukaryotic translation initiation fa  | 0.123  | 1.089 | 6.57E-02 | 6.57E+00 |  |
| 8133442 | NM_032464   | LAT2      | linker for activation of T cells fami | 0.067  | 1.048 | 5.84E-01 | 5.84E+01 |  |
| 8133459 | NM_003388   | CLIP2     | CAP-GLY domain containing linker      | -0.004 | 0.997 | 9.82E-01 | 9.82E+01 |  |
| 8133477 | NM_016328   | GTF2IRD1  | GTF2I repeat domain containing 1      | -0.026 | 0.982 | 9.01E-01 | 9.01E+01 |  |
| 8133500 | BC126309    | WBSR23    | Williams-Beuren syndrome chrom        | 0.022  | 1.015 | 9.15E-01 | 9.15E+01 |  |
| 8133504 | NM_032999   | GTF2I     | general transcription factor Ili      | 0.058  | 1.041 | 6.81E-01 | 6.81E+01 |  |
| 8133531 | NR_027775   | PMS2L5    | postmeiotic segregation increased     | 0.020  | 1.014 | 9.35E-01 | 9.35E+01 |  |
| 8133540 | NM_00114506 | GATSL1    | GATS protein-like 1                   | -0.080 | 0.946 | 5.51E-01 | 5.51E+01 |  |
| 8133549 | NM_00100379 | GTF2IRD2B | GTF2I repeat domain containing 2      | 0.003  | 1.002 | 9.90E-01 | 9.90E+01 |  |
| 8133571 | NR_003664   | SPDYE8P   | speedy homolog E8 (Xenopus lae        | 0.051  | 1.036 | 6.91E-01 | 6.91E+01 |  |
| 8133582 | NR_003664   | SPDYE8P   | speedy homolog E8 (Xenopus lae        | 0.043  | 1.030 | 7.88E-01 | 7.88E+01 |  |
| 8133590 | NR_003664   | SPDYE8P   | speedy homolog E8 (Xenopus lae        | 0.049  | 1.035 | 7.18E-01 | 7.18E+01 |  |
| 8133600 | NR_003664   | SPDYE8P   | speedy homolog E8 (Xenopus lae        | 0.053  | 1.037 | 6.74E-01 | 6.74E+01 |  |
| 8133610 | NM_00101373 | STAG3L3   | stromal antigen 3-like 3              | -0.031 | 0.979 | 8.52E-01 | 8.52E+01 |  |
| 8133625 | NM_198924   | TRIM73    | tripartite motif-containing 73        | -0.020 | 0.986 | 9.11E-01 | 9.11E+01 |  |
| 8133633 | NM_00103957 | NSUN5B    | NOL1/NOP2/Sun domain family, n        | -0.018 | 0.988 | 9.35E-01 | 9.35E+01 |  |
| 8133654 | NM_00109943 | SPDYE5    | speedy homolog E5 (Xenopus lae        | 0.058  | 1.041 | 7.43E-01 | 7.43E+01 |  |
| 8133662 | NM_00104045 | RHBDD2    | rhomoid domain containing 2           | 0.107  | 1.077 | 5.38E-01 | 5.38E+01 |  |
| 8133670 | NM_000941   | POR       | P450 (cytochrome) oxidoreductas       | 0.086  | 1.061 | 5.23E-01 | 5.23E+01 |  |
| 8133690 | NM_005918   | MDH2      | malate dehydrogenase 2, NAD (m        | 0.027  | 1.019 | 8.43E-01 | 8.43E+01 |  |
| 8133704 | NM_00111019 | FLJ37078  | hypothetical protein FLJ37078         | -0.021 | 0.986 | 8.52E-01 | 8.52E+01 |  |
| 8133721 | NM_001540   | HSPB1     | heat shock 27kDa protein 1            | 0.126  | 1.091 | 3.52E-01 | 3.52E+01 |  |
| 8133736 | NM_020892   | DTX2      | deltex homolog 2 (Drosophila)         | 0.030  | 1.021 | 9.42E-01 | 9.42E+01 |  |
| 8133741 | NM_030570   | UPK3B     | uroplakin 3B                          | -0.028 | 0.981 | 8.06E-01 | 8.06E+01 |  |
| 8133752 | ---         | ---       | ---                                   | -0.076 | 0.948 | 5.43E-01 | 5.43E+01 |  |
| 8133754 | NR_023383   | PMS2L11   | postmeiotic segregation increased     | -0.002 | 0.998 | 9.91E-01 | 9.91E+01 |  |
| 8133788 | NM_002835   | PTPN12    | protein tyrosine phosphatase, non     | 0.028  | 1.020 | 9.54E-01 | 9.54E+01 |  |
| 8133809 | NM_198467   | RSBN1L    | round spermatid basic protein 1-li    | 0.054  | 1.038 | 6.89E-01 | 6.89E+01 |  |
| 8133818 | NM_00112735 | PHTF2     | putative homeodomain transcript       | 0.318  | 1.246 | 1.14E-03 | 1.14E-01 |  |
| 8133874 | ---         | ---       | ---                                   | 0.031  | 1.022 | 8.50E-01 | 8.50E+01 |  |
| 8133896 | ---         | ---       | ---                                   | -0.015 | 0.990 | 9.27E-01 | 9.27E+01 |  |
| 8133902 | ---         | ---       | ---                                   | -0.009 | 0.993 | 9.78E-01 | 9.78E+01 |  |
| 8133914 | NR_024549   | DMTF1     | cyclin D binding myb-like transcrip   | 0.016  | 1.011 | 9.18E-01 | 9.18E+01 |  |
| 8134079 | NM_033107   | GTPBP10   | GTP-binding protein 10 (putative)     | 0.132  | 1.096 | 3.45E-01 | 3.45E+01 |  |
| 8134098 | NM_012395   | PFTK1     | PFTAIRES protein kinase 1             | 0.244  | 1.185 | 3.59E-01 | 3.59E+01 |  |
| 8134117 | NM_003505   | FZD1      | frizzled homolog 1 (Drosophila)       | 0.037  | 1.026 | 8.45E-01 | 8.45E+01 |  |
| 8134122 | NM_005751   | AKAP9     | A kinase (PRKA) anchor protein (y     | -0.046 | 0.969 | 7.51E-01 | 7.51E+01 |  |
| 8134180 | NM_019004   | ANKIB1    | ankyrin repeat and IBR domain co      | -0.044 | 0.970 | 6.34E-01 | 6.34E+01 |  |
| 8134201 | NM_021167   | GATAD1    | GATA zinc finger domain containin     | 0.047  | 1.033 | 6.05E-01 | 6.05E+01 |  |
| 8134211 | NM_032120   | C7orf64   | chromosome 7 open reading fram        | 0.018  | 1.013 | 9.50E-01 | 9.50E+01 |  |
| 8134263 | NM_000089   | COL1A2    | collagen, type I, alpha 2             | -0.033 | 0.977 | 7.24E-01 | 7.24E+01 |  |
| 8134318 | NM_022900   | CASD1     | CAS1 domain containing 1              | 0.066  | 1.047 | 7.58E-01 | 7.58E+01 |  |
| 8134349 | ---         | ---       | ---                                   | 0.072  | 1.051 | 4.77E-01 | 4.77E+01 |  |
| 8134374 | ---         | ---       | ---                                   | -0.006 | 0.996 | 9.81E-01 | 9.81E+01 |  |
| 8134407 | NM_005222   | DLX6      | distal-less homeobox 6                | 0.003  | 1.002 | 9.86E-01 | 9.86E+01 |  |
| 8134429 | ---         | ---       | ---                                   | -0.002 | 0.999 | 9.97E-01 | 9.97E+01 |  |
| 8134431 | ---         | ---       | ---                                   | -0.022 | 0.985 | 9.22E-01 | 9.22E+01 |  |
| 8134433 | ---         | ---       | ---                                   | 0.007  | 1.005 | 9.77E-01 | 9.77E+01 |  |
| 8134435 | NM_014916   | LMTK2     | lemur tyrosine kinase 2               | -0.057 | 0.961 | 6.94E-01 | 6.94E+01 |  |
| 8134452 | NM_177455   | BHLHA15   | basic helix-loop-helix family, mem    | 0.035  | 1.025 | 8.06E-01 | 8.06E+01 |  |
| 8134454 | NM_015379   | BRI3      | brain protein I3                      | 0.244  | 1.185 | 2.50E-01 | 2.50E+01 |  |

|         |              |          |                                      |        |       |          |          |  |  |
|---------|--------------|----------|--------------------------------------|--------|-------|----------|----------|--|--|
| 8134460 | AK054626     | FLJ30064 | hypothetical protein LOC644975       | 0.089  | 1.064 | 6.79E-01 | 6.79E+01 |  |  |
| 8134463 | NM_002523    | NPTX2    | neuronal pentraxin II                | 0.019  | 1.013 | 8.97E-01 | 8.97E+01 |  |  |
| 8134470 | NM_003496    | TRRAP    | transformation/transcription dom     | -0.045 | 0.969 | 6.13E-01 | 6.13E+01 |  |  |
| 8134552 | NM_005720    | ARPC1B   | actin related protein 2/3 complex,   | 0.106  | 1.076 | 4.42E-01 | 4.42E+01 |  |  |
| 8134581 | NM_006409    | ARPC1A   | actin related protein 2/3 complex,   | 0.018  | 1.013 | 9.48E-01 | 9.48E+01 |  |  |
| 8134589 | NM_003910    | BUD31    | BUD31 homolog (S. cerevisiae)        | -0.101 | 0.932 | 5.02E-01 | 5.02E+01 |  |  |
| 8134599 | NM_006693    | CPSF4    | cleavage and polyadenylation spe     | -0.142 | 0.906 | 6.36E-02 | 6.36E+00 |  |  |
| 8134613 | NM_213603    | ZNF789   | zinc finger protein 789              | -0.073 | 0.951 | 4.99E-01 | 4.99E+01 |  |  |
| 8134621 | NM_014569    | ZKSCAN5  | zinc finger with KRAB and SCAN do    | -0.032 | 0.978 | 8.29E-01 | 8.29E+01 |  |  |
| 8134631 | NM_138494    | ZNF655   | zinc finger protein 655              | -0.058 | 0.961 | 4.35E-01 | 4.35E+01 |  |  |
| 8134644 | NM_145115    | ZNF498   | zinc finger protein 498              | -0.026 | 0.982 | 8.67E-01 | 8.67E+01 |  |  |
| 8134680 | NM_003439    | ZKSCAN1  | zinc finger with KRAB and SCAN do    | 0.012  | 1.009 | 9.57E-01 | 9.57E+01 |  |  |
| 8134689 | NM_145914    | ZSCAN21  | zinc finger and SCAN domain cont     | 0.048  | 1.034 | 7.40E-01 | 7.40E+01 |  |  |
| 8134699 | NM_006833    | COP56    | COP9 constitutive photomorphoge      | 0.022  | 1.015 | 9.18E-01 | 9.18E+01 |  |  |
| 8134712 | NM_004722    | AP4M1    | adaptor-related protein complex 4    | -0.044 | 0.970 | 8.04E-01 | 8.04E+01 |  |  |
| 8134730 | NM_152755    | CNPY4    | canopy 4 homolog (zebrafish)         | -0.112 | 0.925 | 5.38E-01 | 5.38E+01 |  |  |
| 8134737 | NM_203397    | MBLAC1   | metallo-beta-lactamase domain co     | -0.013 | 0.991 | 9.39E-01 | 9.39E+01 |  |  |
| 8134740 | NM_00100839  | C7orf59  | chromosome 7 open reading fram       | -0.059 | 0.960 | 6.28E-01 | 6.28E+01 |  |  |
| 8134745 | NM_012447    | STAG3    | stromal antigen 3                    | -0.134 | 0.911 | 6.76E-02 | 6.76E+00 |  |  |
| 8134777 | NM_024070    | PVRIG    | poliovirus receptor related immun    | -0.041 | 0.972 | 7.73E-01 | 7.73E+01 |  |  |
| 8134789 | NM_013440    | PILRB    | paired immunoglobulin-like type 2 r  | -0.022 | 0.985 | 8.33E-01 | 8.33E+01 |  |  |
| 8134814 | NM_013439    | PILRA    | paired immunoglobulin-like type 2 r  | -0.113 | 0.925 | 7.91E-01 | 7.91E+01 |  |  |
| 8134821 | NM_019606    | MEPCE    | methylphosphate capping enzyme       | -0.064 | 0.957 | 5.53E-01 | 5.53E+01 |  |  |
| 8134827 | NM_173564    | C7orf51  | chromosome 7 open reading fram       | -0.088 | 0.941 | 1.57E-01 | 1.57E+01 |  |  |
| 8134834 | NM_006076    | AGFG2    | ArfGAP with FG repeats 2             | -0.005 | 0.996 | 9.76E-01 | 9.76E+01 |  |  |
| 8134856 | NM_033506    | FBXO24   | F-box protein 24                     | -0.036 | 0.975 | 7.88E-01 | 7.88E+01 |  |  |
| 8134869 | NM_002593    | PCOLCE   | procollagen C-endopeptidase enh      | -0.001 | 1.000 | 9.98E-01 | 9.98E+01 |  |  |
| 8134880 | NM_023948    | MOSPD3   | motile sperm domain containing 3     | -0.038 | 0.974 | 7.13E-01 | 7.13E+01 |  |  |
| 8134890 | NM_005273    | GNB2     | guanine nucleotide binding protei    | 0.079  | 1.056 | 3.38E-01 | 3.38E+01 |  |  |
| 8134904 | NM_005837    | POP7     | processing of precursor 7, ribonuc   | 0.012  | 1.008 | 9.55E-01 | 9.55E+01 |  |  |
| 8134907 | NM_000799    | EPO      | erythropoietin                       | 0.028  | 1.019 | 8.06E-01 | 8.06E+01 |  |  |
| 8134915 | NM_003386    | ZAN      | zonadhesin                           | -0.019 | 0.987 | 8.57E-01 | 8.57E+01 |  |  |
| 8134965 | NM_020246    | SLC12A9  | solute carrier family 12 (potassium  | 0.019  | 1.013 | 9.25E-01 | 9.25E+01 |  |  |
| 8134981 | NM_003302    | TRIP6    | thyroid hormone receptor interact    | 0.002  | 1.002 | 9.88E-01 | 9.88E+01 |  |  |
| 8134992 | NM_015908    | SRRT     | serrate RNA effector molecule hor    | -0.107 | 0.929 | 2.83E-01 | 2.83E+01 |  |  |
| 8135031 | ENST00000379 | MUC12    | mucin 12, cell surface associated    | -0.052 | 0.965 | 7.75E-01 | 7.75E+01 |  |  |
| 8135033 | ENST00000379 | MUC12    | mucin 12, cell surface associated    | 0.043  | 1.030 | 9.12E-01 | 9.12E+01 |  |  |
| 8135064 | NM_030961    | TRIM56   | tripartite motif-containing 56       | 0.000  | 1.000 | 1.00E+00 | 1.00E+02 |  |  |
| 8135069 | NM_000602    | SERPINE1 | serpin peptidase inhibitor, clade E  | 0.016  | 1.011 | 9.43E-01 | 9.43E+01 |  |  |
| 8135080 | NM_001283    | AP1S1    | adaptor-related protein complex 1    | -0.097 | 0.935 | 4.29E-01 | 4.29E+01 |  |  |
| 8135089 | NM_006349    | ZNHIT1   | zinc finger, HIT type 1              | 0.057  | 1.041 | 5.61E-01 | 5.61E+01 |  |  |
| 8135099 | NM_133457    | EMID2    | EMI domain containing 2              | 0.021  | 1.015 | 8.88E-01 | 8.88E+01 |  |  |
| 8135114 | NM_181552    | CUX1     | cut-like homeobox 1                  | -0.093 | 0.938 | 2.26E-01 | 2.26E+01 |  |  |
| 8135149 | NM_020979    | SH2B2    | SH2B adaptor protein 2               | -0.008 | 0.994 | 9.63E-01 | 9.63E+01 |  |  |
| 8135162 | NM_024653    | PRKRIP1  | PRKR interacting protein 1 (IL11 in  | -0.026 | 0.982 | 9.09E-01 | 9.09E+01 |  |  |
| 8135172 | NM_00112634  | ORAI2    | ORAI calcium release-activated ca    | -0.059 | 0.960 | 6.41E-01 | 6.41E+01 |  |  |
| 8135181 | NM_152892    | LRWD1    | leucine-rich repeats and WD repe     | -0.016 | 0.989 | 8.94E-01 | 8.94E+01 |  |  |
| 8135197 | NM_00103161  | SPDYE2   | speedy homolog E2 (Xenopus laev      | 0.020  | 1.014 | 9.53E-01 | 9.53E+01 |  |  |
| 8135204 | NM_00103161  | SPDYE2   | speedy homolog E2 (Xenopus laev      | 0.032  | 1.022 | 9.12E-01 | 9.12E+01 |  |  |
| 8135211 | NR_026879    | FAM185A  | family with sequence similarity 18   | 0.034  | 1.024 | 9.30E-01 | 9.30E+01 |  |  |
| 8135229 | NM_031905    | ARMC10   | armadillo repeat containing 10       | -0.017 | 0.989 | 9.50E-01 | 9.50E+01 |  |  |
| 8135235 | NM_004279    | PMPCB    | peptidase (mitochondrial processi    | -0.079 | 0.947 | 6.16E-01 | 6.16E+01 |  |  |
| 8135250 | NM_002803    | PSMC2    | proteasome (prosome, macropain       | 0.099  | 1.071 | 4.96E-01 | 4.96E+01 |  |  |
| 8135268 | NM_001417    | EIF4B    | eukaryotic translation initiation fa | -0.034 | 0.977 | 9.09E-01 | 9.09E+01 |  |  |
| 8135271 | ---          | ---      | ---                                  | -0.098 | 0.934 | 3.79E-01 | 3.79E+01 |  |  |
| 8135273 | ---          | ---      | ---                                  | -0.049 | 0.967 | 7.57E-01 | 7.57E+01 |  |  |
| 8135275 | ---          | ---      | ---                                  | 0.025  | 1.018 | 9.30E-01 | 9.30E+01 |  |  |
| 8135277 | NM_182931    | MLL5     | myeloid/lymphoid or mixed-lineag     | -0.078 | 0.947 | 2.35E-01 | 2.35E+01 |  |  |
| 8135319 | ---          | ---      | ---                                  | 0.033  | 1.023 | 8.78E-01 | 8.78E+01 |  |  |
| 8135321 | ---          | ---      | ---                                  | 0.133  | 1.097 | 5.50E-01 | 5.50E+01 |  |  |
| 8135323 | NM_021930    | RINT1    | RAD50 interactor 1                   | 0.080  | 1.057 | 5.89E-01 | 5.89E+01 |  |  |
| 8135341 | NM_152750    | FLJ23834 | hypothetical protein FLJ23834        | -0.218 | 0.860 | 4.49E-01 | 4.49E+01 |  |  |
| 8135363 | NM_002649    | PIK3CG   | phosphoinositide-3-kinase, catalyt   | 0.048  | 1.034 | 8.34E-01 | 8.34E+01 |  |  |
| 8135378 | NM_002736    | PRKAR2B  | protein kinase, cAMP-dependent,      | 0.245  | 1.185 | 1.30E-01 | 1.30E+01 |  |  |
| 8135392 | NM_012257    | HBP1     | HMG-box transcription factor 1       | -0.021 | 0.986 | 9.23E-01 | 9.23E+01 |  |  |
| 8135422 | NM_00100840  | BCAP29   | B-cell receptor-associated protein   | 0.046  | 1.033 | 7.50E-01 | 7.50E+01 |  |  |
| 8135458 | NM_024814    | CBLL1    | Cas-Br-M (murine) ecotropic retro    | -0.024 | 0.984 | 9.07E-01 | 9.07E+01 |  |  |
| 8135464 | NM_000108    | DLD      | dihydroliipoamide dehydrogenase      | -0.031 | 0.979 | 8.78E-01 | 8.78E+01 |  |  |
| 8135480 | NM_012328    | DNAJB9   | DnaJ (Hsp40) homolog, subfamily      | -0.001 | 0.999 | 9.97E-01 | 9.97E+01 |  |  |
| 8135488 | NM_00109966  | LRRN3    | leucine rich repeat neuronal 3       | -0.212 | 0.864 | 6.94E-01 | 6.94E+01 |  |  |
| 8135497 | NM_021994    | ZNF277   | zinc finger protein 277              | -0.072 | 0.951 | 6.76E-01 | 6.76E+01 |  |  |
| 8135514 | NM_001550    | IFRD1    | interferon-related developmental     | -0.014 | 0.991 | 9.58E-01 | 9.58E+01 |  |  |
| 8135568 | NM_199072    | MDFIC    | MyoD family inhibitor domain con     | 0.145  | 1.106 | 4.35E-03 | 4.35E-01 |  |  |
| 8135576 | NM_015641    | TES      | testis derived transcript (3 LIM do  | -0.005 | 0.996 | 9.77E-01 | 9.77E+01 |  |  |
| 8135625 | NM_006136    | CAPZA2   | capping protein (actin filament) m   | 0.214  | 1.160 | 9.99E-02 | 9.99E+00 |  |  |
| 8135638 | NM_018412    | ST7      | suppression of tumorigenicity 7      | -0.078 | 0.947 | 6.41E-01 | 6.41E+01 |  |  |
| 8135688 | NM_016200    | LSM8     | LSM8 homolog, U6 small nuclear R     | -0.033 | 0.978 | 8.49E-01 | 8.49E+01 |  |  |

|         |             |              |                                                 |        |       |          |          |  |
|---------|-------------|--------------|-------------------------------------------------|--------|-------|----------|----------|--|
| 8135718 | NM_019071   | ING3         | inhibitor of growth family, member 3            | 0.030  | 1.021 | 8.44E-01 | 8.44E+01 |  |
| 8135763 | NM_057168   | WNT16        | wingless-type MMTV integration site 16          | 0.004  | 1.003 | 9.85E-01 | 9.85E+01 |  |
| 8135856 | NM_001662   | ARF5         | ADP-ribosylation factor 5                       | 0.002  | 1.002 | 9.88E-01 | 9.88E+01 |  |
| 8135876 | NM_014390   | SND1         | staphylococcal nuclease and tudor domain 1      | 0.090  | 1.065 | 4.04E-01 | 4.04E+01 |  |
| 8135909 | NM_000230   | LEP          | leptin                                          | 0.041  | 1.029 | 8.03E-01 | 8.03E+01 |  |
| 8135915 | NM_013332   | C7orf68      | chromosome 7 open reading frame 68              | -0.028 | 0.981 | 8.86E-01 | 8.86E+01 |  |
| 8135922 | NM_018396   | METTL2B      | methyltransferase like 2B                       | -0.037 | 0.975 | 8.87E-01 | 8.87E+01 |  |
| 8135931 | NR_024368   | tcag7.907    | hypothetical LOC402483                          | -0.002 | 0.998 | 9.90E-01 | 9.90E+01 |  |
| 8135955 | NM_001219   | CALU         | calumenin                                       | 0.316  | 1.245 | 8.58E-02 | 8.58E+00 |  |
| 8135967 | ---         | ---          | ---                                             | 0.077  | 1.055 | 7.87E-01 | 7.87E+01 |  |
| 8135969 | NM_022742   | CCDC136      | coiled-coil domain containing 136               | -0.098 | 0.934 | 4.25E-01 | 4.25E+01 |  |
| 8135990 | NM_001458   | FLNC         | filamin C, gamma                                | -0.012 | 0.992 | 9.13E-01 | 9.13E+01 |  |
| 8136039 | NM_004231   | ATP6V1F      | ATPase, H+ transporting, lysosomal 6, isoform 1 | 0.214  | 1.160 | 7.91E-02 | 7.91E+00 |  |
| 8136045 | NM_002200   | IRF5         | interferon regulatory factor 5                  | -0.022 | 0.985 | 9.06E-01 | 9.06E+01 |  |
| 8136059 | ---         | ---          | ---                                             | 0.011  | 1.007 | 9.73E-01 | 9.73E+01 |  |
| 8136061 | NR_002187   | tcag7.1015   | triosephosphate isomerase 1 pseudogene          | -0.091 | 0.939 | 3.14E-01 | 3.14E+01 |  |
| 8136065 | NR_002144   | LOC407835    | mitogen-activated protein kinase 10             | -0.011 | 0.992 | 9.37E-01 | 9.37E+01 |  |
| 8136067 | NM_178562   | TSPAN33      | tetraspanin 33                                  | -0.045 | 0.969 | 8.74E-01 | 8.74E+01 |  |
| 8136078 | ---         | ---          | ---                                             | -0.090 | 0.939 | 8.23E-01 | 8.23E+01 |  |
| 8136080 | NM_005631   | SMO          | smoothened homolog (Drosophila)                 | -0.010 | 0.993 | 9.46E-01 | 9.46E+01 |  |
| 8136095 | NM_015328   | AHCYL2       | adenosylhomocysteinase-like 2                   | -0.001 | 0.999 | 9.97E-01 | 9.97E+01 |  |
| 8136140 | NM_005011   | NRF1         | nuclear respiratory factor 1                    | -0.009 | 0.994 | 9.63E-01 | 9.63E+01 |  |
| 8136159 | ---         | ---          | ---                                             | -0.017 | 0.988 | 9.79E-01 | 9.79E+01 |  |
| 8136161 | ---         | ---          | ---                                             | 0.064  | 1.046 | 8.30E-01 | 8.30E+01 |  |
| 8136163 | NM_014997   | KLHDC10      | kelch domain containing 10                      | 0.005  | 1.004 | 9.80E-01 | 9.80E+01 |  |
| 8136177 | AF277177    | LOC100287552 | PNAS-119                                        | -0.050 | 0.966 | 8.07E-01 | 8.07E+01 |  |
| 8136179 | ---         | ---          | ---                                             | -0.105 | 0.930 | 7.87E-01 | 7.87E+01 |  |
| 8136235 | NM_001868   | CPA1         | carboxypeptidase A1 (pancreatic)                | -0.030 | 0.979 | 8.56E-01 | 8.56E+01 |  |
| 8136259 | NM_013255   | MKLN1        | muskelin 1, intracellular mediator              | -0.008 | 0.995 | 9.64E-01 | 9.64E+01 |  |
| 8136289 | ---         | ---          | ---                                             | -0.040 | 0.972 | 7.56E-01 | 7.56E+01 |  |
| 8136293 | NM_021807   | EXOC4        | exocyst complex component 4                     | 0.065  | 1.046 | 5.87E-01 | 5.87E+01 |  |
| 8136341 | NM_199186   | BPGM         | 2,3-bisphosphoglycerate mutase                  | -0.090 | 0.939 | 6.00E-01 | 6.00E+01 |  |
| 8136388 | NM_018295   | TMEM140      | transmembrane protein 140                       | 0.027  | 1.019 | 9.15E-01 | 9.15E+01 |  |
| 8136401 | NM_015135   | NUP205       | nucleoporin 205kDa                              | -0.023 | 0.984 | 9.07E-01 | 9.07E+01 |  |
| 8136446 | ---         | ---          | ---                                             | 0.120  | 1.087 | 6.40E-01 | 6.40E+01 |  |
| 8136471 | ---         | ---          | ---                                             | 0.006  | 1.004 | 9.88E-01 | 9.88E+01 |  |
| 8136473 | NM_015905   | TRIM24       | tripartite motif-containing 24                  | 0.084  | 1.060 | 3.54E-01 | 3.54E+01 |  |
| 8136516 | NM_173569   | UBN2         | ubiquitin 2                                     | -0.010 | 0.993 | 9.64E-01 | 9.64E+01 |  |
| 8136535 | NM_197964   | C7orf55      | chromosome 7 open reading frame 55              | 0.077  | 1.055 | 4.16E-01 | 4.16E+01 |  |
| 8136539 | NM_016019   | LUC7L2       | LUC7-like 2 (S. cerevisiae)                     | 0.046  | 1.033 | 5.88E-01 | 5.88E+01 |  |
| 8136557 | NM_00113096 | TBXAS1       | thromboxane A synthase 1 (platelet)             | 0.206  | 1.154 | 4.35E-01 | 4.35E+01 |  |
| 8136576 | ---         | ---          | ---                                             | -0.058 | 0.961 | 7.36E-01 | 7.36E+01 |  |
| 8136580 | NM_00100874 | RAB19        | RAB19, member RAS oncogene family               | -0.073 | 0.951 | 5.33E-01 | 5.33E+01 |  |
| 8136589 | ---         | ---          | ---                                             | 0.058  | 1.041 | 7.51E-01 | 7.51E+01 |  |
| 8136591 | NM_052853   | ADCK2        | aarF domain containing kinase 2                 | 0.028  | 1.019 | 8.41E-01 | 8.41E+01 |  |
| 8136602 | NM_004546   | NDUFB2       | NADH dehydrogenase (ubiquinone) 1, subunit 2    | 0.059  | 1.041 | 4.42E-01 | 4.42E+01 |  |
| 8136614 | NM_018238   | AGK          | acylglycerol kinase                             | -0.007 | 0.995 | 9.79E-01 | 9.79E+01 |  |
| 8136631 | NM_003143   | SSBP1        | single-stranded DNA binding protein 1           | -0.021 | 0.986 | 9.18E-01 | 9.18E+01 |  |
| 8136641 | NM_016943   | TAS2R3       | taste receptor, type 2, member 3                | -0.002 | 0.999 | 9.96E-01 | 9.96E+01 |  |
| 8136647 | NM_018980   | TAS2R5       | taste receptor, type 2, member 5                | 0.123  | 1.089 | 4.16E-01 | 4.16E+01 |  |
| 8136654 | ---         | ---          | ---                                             | 0.144  | 1.105 | 7.04E-01 | 7.04E+01 |  |
| 8136658 | ---         | ---          | ---                                             | -0.342 | 0.789 | 2.91E-01 | 2.91E+01 |  |
| 8136727 | 0           | 0            | 0                                               | -0.101 | 0.932 | 7.74E-02 | 7.74E+00 |  |
| 8136801 | NR_001296   | TRY6         | trypsinogen C                                   | -0.045 | 0.970 | 8.78E-01 | 8.78E+01 |  |
| 8136807 | 0           | 0            | 0                                               | -0.099 | 0.934 | 7.85E-01 | 7.85E+01 |  |
| 8136811 | NM_004445   | EPHB6        | EPH receptor B6                                 | 0.007  | 1.005 | 9.75E-01 | 9.75E+01 |  |
| 8136832 | NM_178829   | C7orf34      | chromosome 7 open reading frame 34              | 0.061  | 1.043 | 6.57E-01 | 6.57E+01 |  |
| 8136837 | NM_00100166 | OR6V1        | olfactory receptor, family 6, subfamily 1       | -0.077 | 0.948 | 3.40E-01 | 3.40E+01 |  |
| 8136849 | NM_00114367 | GSTK1        | glutathione S-transferase kappa 1               | 0.137  | 1.099 | 1.48E-01 | 1.48E+01 |  |
| 8136863 | NM_153345   | TMEM139      | transmembrane protein 139                       | -0.025 | 0.983 | 8.47E-01 | 8.47E+01 |  |
| 8136869 | NM_032982   | CASP2        | caspase 2, apoptosis-related cysteine protease  | 0.024  | 1.017 | 8.63E-01 | 8.63E+01 |  |
| 8136889 | ---         | ---          | ---                                             | 0.049  | 1.035 | 8.00E-01 | 8.00E+01 |  |
| 8136893 | NM_000083   | CLCN1        | chloride channel 1, skeletal muscle             | -0.016 | 0.989 | 9.33E-01 | 9.33E+01 |  |
| 8136918 | NM_003461   | ZYX          | zyxin                                           | 0.152  | 1.111 | 1.79E-01 | 1.79E+01 |  |
| 8136930 | NM_177437   | TAS2R60      | taste receptor, type 2, member 60               | 0.087  | 1.062 | 6.80E-01 | 6.80E+01 |  |
| 8136934 | NM_176883   | TAS2R41      | taste receptor, type 2, member 41               | -0.131 | 0.913 | 3.68E-01 | 3.68E+01 |  |
| 8136936 | NM_178561   | CTAGE6       | CTAGE family, member 6                          | -0.114 | 0.924 | 6.30E-01 | 6.30E+01 |  |
| 8136938 | ---         | ---          | ---                                             | -0.318 | 0.802 | 6.33E-01 | 6.33E+01 |  |
| 8136940 | NM_00113002 | FAM115C      | family with sequence similarity 11, member 5    | -0.233 | 0.851 | 6.89E-02 | 6.89E+00 |  |
| 8136954 | NM_00113002 | FAM115C      | family with sequence similarity 11, member 5    | -0.199 | 0.871 | 1.53E-01 | 1.53E+01 |  |
| 8136983 | NR_002158   | OR2A20P      | olfactory receptor, family 2, subfamily 20      | 0.037  | 1.026 | 8.87E-01 | 8.87E+01 |  |
| 8136985 | NM_00100528 | OR2A1        | olfactory receptor, family 2, subfamily 1       | 0.037  | 1.026 | 8.45E-01 | 8.45E+01 |  |
| 8136987 | NM_005435   | ARHGEF5      | Rho guanine nucleotide exchange factor 5        | 0.016  | 1.011 | 9.18E-01 | 9.18E+01 |  |
| 8137008 | AK290098    | C7orf11      | chromosome 7 open reading frame 11              | -0.085 | 0.943 | 4.56E-01 | 4.56E+01 |  |
| 8137044 | ---         | ---          | ---                                             | -0.095 | 0.936 | 4.85E-01 | 4.85E+01 |  |
| 8137054 | NM_003592   | CUL1         | cullin 1                                        | -0.015 | 0.989 | 9.54E-01 | 9.54E+01 |  |
| 8137081 | ---         | ---          | ---                                             | 0.061  | 1.043 | 8.38E-01 | 8.38E+01 |  |

|         |               |              |                                          |        |       |          |          |
|---------|---------------|--------------|------------------------------------------|--------|-------|----------|----------|
| 8137091 | NM_170686     | ZNF398       | zinc finger protein 398                  | -0.086 | 0.942 | 4.60E-01 | 4.60E+01 |
| 8137101 | NM_003575     | ZNF282       | zinc finger protein 282                  | -0.024 | 0.983 | 8.27E-01 | 8.27E+01 |
| 8137112 | NM_012256     | ZNF212       | zinc finger protein 212                  | -0.076 | 0.948 | 3.38E-01 | 3.38E+01 |
| 8137118 | NR_015357     | ZNF783       | zinc finger family member 783            | -0.046 | 0.968 | 7.17E-01 | 7.17E+01 |
| 8137131 | ---           | ---          | ---                                      | -0.036 | 0.976 | 9.19E-01 | 9.19E+01 |
| 8137133 | NM_032534     | KRBA1        | KRAB-A domain containing 1               | -0.033 | 0.978 | 8.34E-01 | 8.34E+01 |
| 8137151 | NM_198455     | SSPO         | SCO-spondin homolog (Bos taurus)         | -0.030 | 0.979 | 7.19E-01 | 7.19E+01 |
| 8137183 | NM_198455     | SSPO         | SCO-spondin homolog (Bos taurus)         | -0.054 | 0.963 | 5.52E-01 | 5.52E+01 |
| 8137202 | NM_00109922   | ZNF862       | zinc finger protein 862                  | 0.048  | 1.034 | 7.45E-01 | 7.45E+01 |
| 8137208 | NM_145230     | ATP6V0E2     | ATPase, H+ transporting V0 subunit       | -0.027 | 0.982 | 8.31E-01 | 8.31E+01 |
| 8137215 | NM_00114292   | LRRC61       | leucine rich repeat containing 61        | -0.037 | 0.974 | 7.11E-01 | 7.11E+01 |
| 8137219 | NM_138434     | C7orf29      | chromosome 7 open reading frame          | -0.049 | 0.966 | 6.32E-01 | 6.32E+01 |
| 8137225 | NM_013400     | REP1N1       | replication initiator 1                  | -0.028 | 0.980 | 8.33E-01 | 8.33E+01 |
| 8137228 | NM_173680     | ZNF775       | zinc finger protein 775                  | -0.067 | 0.955 | 4.26E-01 | 4.26E+01 |
| 8137232 | NM_175571     | GIMAP8       | GTPase, IMAP family member 8             | 0.287  | 1.220 | 1.03E-02 | 1.03E+00 |
| 8137240 | NM_153236     | GIMAP7       | GTPase, IMAP family member 7             | 0.021  | 1.015 | 9.07E-01 | 9.07E+01 |
| 8137244 | NM_018326     | GIMAP4       | GTPase, IMAP family member 4             | 0.099  | 1.071 | 1.59E-01 | 1.59E+01 |
| 8137250 | NM_015660     | GIMAP2       | GTPase, IMAP family member 2             | 0.132  | 1.096 | 2.26E-01 | 2.26E+01 |
| 8137252 | NM_130759     | GIMAP1       | GTPase, IMAP family member 1             | -0.033 | 0.978 | 8.47E-01 | 8.47E+01 |
| 8137257 | NM_018384     | GIMAP5       | GTPase, IMAP family member 5             | 0.099  | 1.071 | 6.05E-01 | 6.05E+01 |
| 8137271 | NM_001091     | ABP1         | amiloride binding protein 1 (amine)      | -0.037 | 0.975 | 7.67E-01 | 7.67E+01 |
| 8137280 | NM_000603     | NOS3         | nitric oxide synthase 3 (endothelial)    | 0.065  | 1.046 | 3.90E-01 | 3.90E+01 |
| 8137310 | NM_007188     | ABC8B        | ATP-binding cassette, sub-family B       | -0.027 | 0.981 | 7.89E-01 | 7.89E+01 |
| 8137330 | ENST00000356  | ABC8B        | ATP-binding cassette, sub-family B       | -0.065 | 0.956 | 4.48E-01 | 4.48E+01 |
| 8137332 | NM_007188     | ABC8B        | ATP-binding cassette, sub-family B       | -0.008 | 0.995 | 9.68E-01 | 9.68E+01 |
| 8137334 | NM_007188     | ABC8B        | ATP-binding cassette, sub-family B       | -0.078 | 0.947 | 5.48E-01 | 5.48E+01 |
| 8137336 | NM_004769     | ACCN3        | amiloride-sensitive cation channel       | -0.102 | 0.932 | 2.71E-01 | 2.71E+01 |
| 8137352 | NM_003040     | SLC4A2       | solute carrier family 4, anion exchanger | -0.066 | 0.956 | 3.31E-01 | 3.31E+01 |
| 8137381 | NM_031946     | AGAP3        | ArfGAP with GTPase domain, ankyrin       | -0.033 | 0.977 | 7.85E-01 | 7.85E+01 |
| 8137404 | NM_019015     | CHPF2        | chondroitin polymerizing factor 2        | -0.109 | 0.927 | 1.55E-01 | 1.55E+01 |
| 8137414 | NM_016118     | NUB1         | negative regulator of ubiquitin-like     | -0.029 | 0.980 | 8.83E-01 | 8.83E+01 |
| 8137448 | NM_022087     | GALNT11      | UDP-N-acetyl-alpha-D-galactosamine       | -0.012 | 0.992 | 9.64E-01 | 9.64E+01 |
| 8137464 | NM_004577     | PSPH         | phosphoserine phosphatase                | 0.347  | 1.272 | 2.31E-01 | 2.31E+01 |
| 8137466 | ---           | ---          | ---                                      | 0.349  | 1.274 | 2.08E-01 | 2.08E+01 |
| 8137468 | ENST000000021 | CCT8L1       | chaperonin containing TCP1, subunit      | -0.019 | 0.987 | 9.16E-01 | 9.16E+01 |
| 8137470 | ---           | ---          | ---                                      | -0.010 | 0.993 | 9.64E-01 | 9.64E+01 |
| 8137472 | ---           | ---          | ---                                      | -0.046 | 0.968 | 8.48E-01 | 8.48E+01 |
| 8137474 | NM_020445     | ACTR3B       | ARP3 actin-related protein 3 homolog     | -0.118 | 0.921 | 3.55E-01 | 3.55E+01 |
| 8137483 | AK131514      | FLJ16734     | hypothetical LOC641928                   | -0.060 | 0.960 | 7.72E-01 | 7.72E+01 |
| 8137526 | NM_005542     | INSIG1       | insulin induced gene 1                   | -0.040 | 0.972 | 8.05E-01 | 8.05E+01 |
| 8137537 | NM_001427     | EN2          | engrailed homeobox 2                     | 0.015  | 1.010 | 9.22E-01 | 9.22E+01 |
| 8137542 | NM_053043     | RBM33        | RNA binding motif protein 33             | -0.072 | 0.951 | 4.28E-01 | 4.28E+01 |
| 8137558 | NM_053043     | RBM33        | RNA binding motif protein 33             | -0.017 | 0.989 | 9.30E-01 | 9.30E+01 |
| 8137566 | NM_030936     | RNF32        | ring finger protein 32                   | -0.021 | 0.986 | 9.02E-01 | 9.02E+01 |
| 8137582 | ---           | ---          | ---                                      | 0.071  | 1.051 | 8.63E-01 | 8.63E+01 |
| 8137584 | NM_138400     | NOM1         | nucleolar protein with MIF4G domain      | -0.116 | 0.923 | 2.87E-01 | 2.87E+01 |
| 8137596 | NM_014671     | UBE3C        | ubiquitin protein ligase E3C             | 0.074  | 1.053 | 4.08E-01 | 4.08E+01 |
| 8137627 | NM_058246     | DNAJB6       | DnaJ (Hsp40) homolog, subfamily          | -0.163 | 0.893 | 2.12E-02 | 2.12E+00 |
| 8137635 | ---           | ---          | ---                                      | -0.064 | 0.957 | 5.94E-01 | 5.94E+01 |
| 8137637 | ---           | ---          | ---                                      | 0.013  | 1.009 | 9.43E-01 | 9.43E+01 |
| 8137639 | NM_018051     | WDR60        | WD repeat domain 60                      | -0.074 | 0.950 | 6.78E-01 | 6.78E+01 |
| 8137666 | NM_207366     | 40A35        | septin 14                                | -0.030 | 0.979 | 9.19E-01 | 9.19E+01 |
| 8137668 | ---           | ---          | ---                                      | 0.267  | 1.203 | 4.25E-01 | 4.25E+01 |
| 8137670 | NM_002607     | PDGFA        | platelet-derived growth factor alpha     | 0.048  | 1.034 | 8.36E-01 | 8.36E+01 |
| 8137675 | NM_002735     | PRKAR1B      | protein kinase, cAMP-dependent, type     | 0.031  | 1.022 | 8.83E-01 | 8.83E+01 |
| 8137680 | NM_006869     | ADAP1        | ArfGAP with dual PH domains 1            | -0.080 | 0.946 | 5.52E-01 | 5.52E+01 |
| 8137693 | NM_00103161   | COX19        | COX19 cytochrome c oxidase assembly      | -0.007 | 0.995 | 9.78E-01 | 9.78E+01 |
| 8137700 | NM_032350     | C7orf50      | chromosome 7 open reading frame          | 0.015  | 1.010 | 9.22E-01 | 9.22E+01 |
| 8137707 | ---           | ---          | ---                                      | 0.003  | 1.002 | 9.86E-01 | 9.86E+01 |
| 8137709 | NM_182491     | ZFAND2A      | zinc finger, AN1-type domain 2A          | -0.187 | 0.878 | 1.61E-01 | 1.61E+01 |
| 8137715 | NM_182924     | MICAL2       | MICAL-like 2                             | -0.016 | 0.989 | 9.13E-01 | 9.13E+01 |
| 8137739 | NM_00108045   | INTS1        | integrator complex subunit 1             | -0.069 | 0.953 | 3.08E-01 | 3.08E+01 |
| 8137781 | ENST00000443  | LOC100128653 | hypothetical LOC100128653                | -0.043 | 0.970 | 7.73E-01 | 7.73E+01 |
| 8137783 | NM_00109762   | TMEM184A     | transmembrane protein 184A               | -0.041 | 0.972 | 7.05E-01 | 7.05E+01 |
| 8137798 | NM_032302     | PSMG3        | proteasome (prosome, macropainin)        | 0.046  | 1.033 | 7.17E-01 | 7.17E+01 |
| 8137802 | ENST00000382  | LOC401296    | hypothetical LOC401296                   | 0.019  | 1.014 | 9.07E-01 | 9.07E+01 |
| 8137805 | NM_003550     | MAD1L1       | MAD1 mitotic arrest deficient-like       | -0.038 | 0.974 | 6.50E-01 | 6.50E+01 |
| 8137826 | NM_013393     | FTSJ2        | FtsJ homolog 2 (E. coli)                 | 0.051  | 1.036 | 6.54E-01 | 6.54E+01 |
| 8137833 | NM_013321     | SNX8         | sorting nexin 8                          | 0.056  | 1.039 | 6.79E-01 | 6.79E+01 |
| 8137847 | BC015632      | C7orf27      | chromosome 7 open reading frame          | -0.008 | 0.995 | 9.52E-01 | 9.52E+01 |
| 8137863 | ---           | ---          | ---                                      | 0.270  | 1.206 | 4.79E-01 | 4.79E+01 |
| 8137865 | NM_007353     | GNA12        | guanine nucleotide binding protein       | -0.103 | 0.931 | 4.44E-01 | 4.44E+01 |
| 8137874 | NM_032415     | CARD11       | caspase recruitment domain family        | 0.016  | 1.011 | 9.46E-01 | 9.46E+01 |
| 8137906 | NM_018059     | RADIL        | Ras association and DIL domains          | 0.004  | 1.003 | 9.80E-01 | 9.80E+01 |
| 8137931 | NM_00110060   | MMD2         | monocyte to macrophage differentiation   | -0.039 | 0.973 | 7.80E-01 | 7.80E+01 |
| 8137942 | NM_00108049   | TNRC18       | trinucleotide repeat containing 18       | -0.013 | 0.991 | 9.54E-01 | 9.54E+01 |
| 8137953 | NM_00108049   | TNRC18       | trinucleotide repeat containing 18       | -0.017 | 0.988 | 9.22E-01 | 9.22E+01 |



|         |             |              |                                      |        |       |          |          |  |  |
|---------|-------------|--------------|--------------------------------------|--------|-------|----------|----------|--|--|
| 8137959 | NM_00108049 | TNRC18       | trinucleotide repeat containing 18   | -0.097 | 0.935 | 2.29E-01 | 2.29E+01 |  |  |
| 8137962 | AK125308    | LOC100129484 | hypothetical LOC100129484            | -0.115 | 0.923 | 7.08E-02 | 7.08E+00 |  |  |
| 8137964 | NM_024963   | FBXL18       | F-box and leucine-rich repeat prot   | -0.012 | 0.992 | 9.44E-01 | 9.44E+01 |  |  |
| 8137979 | NM_001101   | ACTB         | actin, beta                          | 0.097  | 1.070 | 5.85E-01 | 5.85E+01 |  |  |
| 8137986 | NM_207111   | RNF216       | ring finger protein 216              | -0.082 | 0.945 | 3.69E-01 | 3.69E+01 |  |  |
| 8138007 | ---         | ---          | ---                                  | -0.033 | 0.977 | 8.26E-01 | 8.26E+01 |  |  |
| 8138030 | NR_003085   | PMS2         | PMS2 postmeiotic segregation inc     | 0.120  | 1.087 | 5.45E-01 | 5.45E+01 |  |  |
| 8138045 | NM_014413   | EIF2AK1      | eukaryotic translation initiation fa | 0.006  | 1.004 | 9.77E-01 | 9.77E+01 |  |  |
| 8138065 | ---         | ---          | ---                                  | -0.002 | 0.999 | 9.93E-01 | 9.93E+01 |  |  |
| 8138067 | NM_004227   | CYTH3        | cytohesin 3                          | -0.114 | 0.924 | 1.37E-01 | 1.37E+01 |  |  |
| 8138088 | NM_00103716 | C7orf70      | chromosome 7 open reading fram       | -0.105 | 0.930 | 4.47E-01 | 4.47E+01 |  |  |
| 8138091 | NM_139179   | DAGLB        | diacylglycerol lipase, beta          | -0.022 | 0.985 | 9.30E-01 | 9.30E+01 |  |  |
| 8138108 | NM_006854   | KDELRL2      | KDEL (Lys-Asp-Glu-Leu) endoplasn     | 0.107  | 1.077 | 3.27E-01 | 3.27E+01 |  |  |
| 8138116 | NM_016265   | ZNF12        | zinc finger protein 12               | -0.015 | 0.990 | 9.24E-01 | 9.24E+01 |  |  |
| 8138128 | NM_015622   | C7orf28A     | chromosome 7 open reading fram       | -0.058 | 0.960 | 5.06E-01 | 5.06E+01 |  |  |
| 8138145 | NR_002822   | MGC72080     | MGC72080 pseudogene                  | -0.077 | 0.948 | 6.80E-01 | 6.80E+01 |  |  |
| 8138147 | NM_030930   | UNC93B1      | unc-93 homolog B1 (C. elegans)       | 0.008  | 1.005 | 9.67E-01 | 9.67E+01 |  |  |
| 8138151 | NR_002822   | MGC72080     | MGC72080 pseudogene                  | 0.003  | 1.002 | 9.92E-01 | 9.92E+01 |  |  |
| 8138155 | ---         | ---          | ---                                  | 0.026  | 1.018 | 9.10E-01 | 9.10E+01 |  |  |
| 8138189 | NM_002947   | RPA3         | replication protein A3, 14kDa        | -0.024 | 0.983 | 8.55E-01 | 8.55E+01 |  |  |
| 8138224 | NM_002489   | NDUFA4       | NADH dehydrogenase (ubiquinone       | 0.170  | 1.125 | 1.64E-02 | 1.64E+00 |  |  |
| 8138353 | NM_005924   | MEOX2        | mesenchyme homeobox 2                | -0.058 | 0.961 | 4.21E-01 | 4.21E+01 |  |  |
| 8138361 | NM_021029   | RPL36A       | ribosomal protein L36a               | 0.033  | 1.023 | 8.73E-01 | 8.73E+01 |  |  |
| 8138370 | NM_020319   | ANKMY2       | ankyrin repeat and MYND domain       | 0.204  | 1.152 | 5.24E-02 | 5.24E+00 |  |  |
| 8138401 | NM_015132   | SNX13        | sorting nexin 13                     | 0.126  | 1.092 | 1.76E-01 | 1.76E+01 |  |  |
| 8138442 | NM_000474   | TWIST1       | twist homolog 1 (Drosophila)         | -0.062 | 0.958 | 5.17E-01 | 5.17E+01 |  |  |
| 8138450 | NM_152898   | FERD3L       | Fer3-like (Drosophila)               | -0.024 | 0.984 | 8.86E-01 | 8.86E+01 |  |  |
| 8138454 | NM_00100292 | TWISTNB      | TWIST neighbor                       | 0.023  | 1.016 | 9.20E-01 | 9.20E+01 |  |  |
| 8138466 | NM_182762   | MACC1        | metastasis associated in colon can   | 0.091  | 1.065 | 8.09E-01 | 8.09E+01 |  |  |
| 8138531 | NM_001402   | EEF1A1       | eukaryotic translation elongation t  | -0.009 | 0.994 | 9.18E-01 | 9.18E+01 |  |  |
| 8138545 | ---         | ---          | ---                                  | 0.016  | 1.011 | 9.73E-01 | 9.73E+01 |  |  |
| 8138547 | NM_019059   | TOMM7        | translocase of outer mitochondria    | 0.008  | 1.006 | 9.75E-01 | 9.75E+01 |  |  |
| 8138581 | NM_013293   | TRA2A        | transformer 2 alpha homolog (Dro     | 0.025  | 1.017 | 8.32E-01 | 8.32E+01 |  |  |
| 8138592 | AB052759    | TRA2A        | transformer 2 alpha homolog (Dro     | -0.014 | 0.990 | 9.49E-01 | 9.49E+01 |  |  |
| 8138596 | NR_002711   | // CLK2P     | CDC-like kinase 2, pseudogene //     | -0.041 | 0.972 | 8.08E-01 | 8.08E+01 |  |  |
| 8138602 | NM_004403   | DFNA5        | deafness, autosomal dominant 5       | -0.044 | 0.970 | 8.82E-01 | 8.82E+01 |  |  |
| 8138613 | NM_015550   | OSBPL3       | oxysterol binding protein-like 3     | 0.191  | 1.142 | 1.27E-01 | 1.27E+01 |  |  |
| 8138640 | NM_018947   | CYCS         | cytochrome c, somatic                | 0.042  | 1.029 | 8.25E-01 | 8.25E+01 |  |  |
| 8138670 | NM_031243   | HNRNPA2B1    | heterogeneous nuclear ribonucleo     | 0.011  | 1.007 | 9.12E-01 | 9.12E+01 |  |  |
| 8138718 | NM_006735   | HOXA2        | homeobox A2                          | 0.236  | 1.178 | 5.11E-02 | 5.11E+00 |  |  |
| 8138721 | NM_153631   | HOXA3        | homeobox A3                          | 0.013  | 1.009 | 9.51E-01 | 9.51E+01 |  |  |
| 8138735 | NM_019102   | HOXA5        | homeobox A5                          | 0.016  | 1.011 | 9.27E-01 | 9.27E+01 |  |  |
| 8138741 | NM_024014   | HOXA6        | homeobox A6                          | -0.093 | 0.938 | 3.27E-01 | 3.27E+01 |  |  |
| 8138745 | NM_006896   | HOXA7        | homeobox A7                          | 0.007  | 1.005 | 9.73E-01 | 9.73E+01 |  |  |
| 8138749 | NM_152739   | HOXA9        | homeobox A9                          | 0.098  | 1.070 | 3.79E-01 | 3.79E+01 |  |  |
| 8138757 | NM_018951   | HOXA10       | homeobox A10                         | -0.057 | 0.961 | 5.41E-01 | 5.41E+01 |  |  |
| 8138770 | NM_000522   | HOXA13       | homeobox A13                         | -0.048 | 0.967 | 6.05E-01 | 6.05E+01 |  |  |
| 8138773 | NM_022170   | EIF4H        | eukaryotic translation initiation fa | 0.108  | 1.078 | 1.61E-01 | 1.61E+01 |  |  |
| 8138776 | NM_152740   | HIBADH       | 3-hydroxyisobutyrate dehydrogen      | 0.039  | 1.028 | 8.76E-01 | 8.76E+01 |  |  |
| 8138789 | NM_175061   | JAZF1        | JAZF zinc finger 1                   | -0.016 | 0.989 | 9.44E-01 | 9.44E+01 |  |  |
| 8138799 | NM_014817   | TRIL         | TLR4 interactor with leucine rich r  | 0.004  | 1.003 | 9.81E-01 | 9.81E+01 |  |  |
| 8138805 | NM_019029   | CPVL         | carboxypeptidase, vitellogenic-like  | 0.555  | 1.469 | 5.65E-02 | 5.65E+00 |  |  |
| 8138824 | NM_014766   | SCRN1        | secernin 1                           | 0.039  | 1.027 | 8.87E-01 | 8.87E+01 |  |  |
| 8138842 | NM_006092   | NOD1         | nucleotide-binding oligomerization   | 0.105  | 1.076 | 4.83E-01 | 4.83E+01 |  |  |
| 8138857 | NM_024051   | GGCT         | gamma-glutamyl cyclotransferase      | 0.173  | 1.127 | 8.81E-02 | 8.81E+00 |  |  |
| 8138862 | ---         | ---          | ---                                  | 0.092  | 1.066 | 7.63E-01 | 7.63E+01 |  |  |
| 8138912 | NR_024466   | LSM5         | LSM5 homolog, U6 small nuclear R     | -0.034 | 0.977 | 8.93E-01 | 8.93E+01 |  |  |
| 8138920 | ---         | ---          | ---                                  | 0.039  | 1.028 | 7.97E-01 | 7.97E+01 |  |  |
| 8138922 | NM_015483   | KBTBD2       | kelch repeat and BTB (POZ) domai     | 0.099  | 1.071 | 3.71E-01 | 3.71E+01 |  |  |
| 8138930 | NR_003500   | RP9P         | retinitis pigmentosa 9 pseudogene    | 0.165  | 1.121 | 9.05E-02 | 9.05E+00 |  |  |
| 8138939 | ---         | ---          | ---                                  | -0.032 | 0.978 | 9.53E-01 | 9.53E+01 |  |  |
| 8138941 | NM_00100200 | NT5C3        | 5'-nucleotidase, cytosolic III       | 0.077  | 1.055 | 7.71E-01 | 7.71E+01 |  |  |
| 8138950 | NM_203288   | RP9          | retinitis pigmentosa 9 (autosomal    | 0.090  | 1.065 | 5.75E-01 | 5.75E+01 |  |  |
| 8138977 | NM_015283   | DPY19L1      | dpy-19-like 1 (C. elegans)           | -0.128 | 0.915 | 5.04E-01 | 5.04E+01 |  |  |
| 8138997 | NM_00107765 | TBX20        | T-box 20                             | 0.023  | 1.016 | 9.16E-01 | 9.16E+01 |  |  |
| 8139003 | NM_022373   | HERPUD2      | HERPUD family member 2               | -0.084 | 0.944 | 4.03E-01 | 4.03E+01 |  |  |
| 8139015 | ---         | ---          | ---                                  | 0.010  | 1.007 | 9.50E-01 | 9.50E+01 |  |  |
| 8139031 | ---         | ---          | ---                                  | 0.117  | 1.085 | 6.05E-01 | 6.05E+01 |  |  |
| 8139033 | NM_001637   | AOAH         | acyloxyacyl hydrolase (neutrophil    | 0.010  | 1.007 | 9.85E-01 | 9.85E+01 |  |  |
| 8139055 | ---         | ---          | ---                                  | -0.119 | 0.921 | 6.58E-01 | 6.58E+01 |  |  |
| 8139057 | NM_014800   | ELMO1        | engulfment and cell motility 1       | 0.063  | 1.045 | 6.33E-01 | 6.33E+01 |  |  |
| 8139083 | ---         | ---          | ---                                  | 0.089  | 1.064 | 7.51E-01 | 7.51E+01 |  |  |
| 8139085 | ---         | ---          | ---                                  | -0.012 | 0.992 | 9.60E-01 | 9.60E+01 |  |  |
| 8139100 | M30894      | TARP         | TCR gamma alternate reading fran     | -0.122 | 0.919 | 8.05E-01 | 8.05E+01 |  |  |
| 8139107 | ---         | ---          | ---                                  | -0.078 | 0.947 | 8.55E-01 | 8.55E+01 |  |  |
| 8139113 | ---         | ---          | ---                                  | -0.054 | 0.963 | 9.01E-01 | 9.01E+01 |  |  |
| 8139118 | ---         | ---          | ---                                  | 0.062  | 1.044 | 9.09E-01 | 9.09E+01 |  |  |

|         |              |              |                                               |        |       |          |          |  |
|---------|--------------|--------------|-----------------------------------------------|--------|-------|----------|----------|--|
| 8139121 | ENST00000390 | TRGV3        | T cell receptor gamma variable 3              | -0.019 | 0.987 | 9.73E-01 | 9.73E+01 |  |
| 8139125 | BC030554     | TARP         | TCR gamma alternate reading frame             | -0.026 | 0.982 | 9.56E-01 | 9.56E+01 |  |
| 8139128 | ---          | ---          | ---                                           | 0.003  | 1.002 | 9.97E-01 | 9.97E+01 |  |
| 8139158 | ---          | ---          | ---                                           | -0.003 | 0.998 | 9.89E-01 | 9.89E+01 |  |
| 8139160 | NM_00110528  | FAM183B      | acyloxyacyl hydrolase (neutrophil)            | 0.066  | 1.047 | 8.78E-01 | 8.78E+01 |  |
| 8139165 | NM_014396    | VPS41        | vacuolar protein sorting 41 homolog           | 0.163  | 1.119 | 2.64E-01 | 2.64E+01 |  |
| 8139198 | NM_152682    | RWDD4A       | RWD domain containing 4A                      | 0.100  | 1.072 | 5.12E-01 | 5.12E+01 |  |
| 8139201 | ---          | ---          | ---                                           | 0.040  | 1.028 | 8.35E-01 | 8.35E+01 |  |
| 8139203 | NM_138701    | C7orf11      | chromosome 7 open reading frame               | -0.057 | 0.961 | 6.91E-01 | 6.91E+01 |  |
| 8139207 | NM_002192    | INHBA        | inhibin, beta A                               | -0.562 | 0.677 | 2.31E-01 | 2.31E+01 |  |
| 8139228 | NM_00109985  | C7orf25      | chromosome 7 open reading frame               | -0.065 | 0.956 | 7.19E-01 | 7.19E+01 |  |
| 8139232 | NM_002787    | PSMA2        | proteasome (prosome, macropain)               | 0.085  | 1.060 | 6.03E-01 | 6.03E+01 |  |
| 8139242 | ---          | ---          | ---                                           | 0.045  | 1.031 | 7.72E-01 | 7.72E+01 |  |
| 8139244 | NM_018224    | C7orf44      | chromosome 7 open reading frame               | -0.050 | 0.966 | 8.01E-01 | 8.01E+01 |  |
| 8139250 | NM_032014    | MRPS24       | mitochondrial ribosomal protein S24           | -0.063 | 0.957 | 6.35E-01 | 6.35E+01 |  |
| 8139256 | NM_017920    | URG4         | up-regulated gene 4                           | -0.157 | 0.897 | 4.04E-01 | 4.04E+01 |  |
| 8139264 | NR_003655    | POLR2J4      | polymerase (RNA) II (DNA directed)            | -0.037 | 0.975 | 8.90E-01 | 8.90E+01 |  |
| 8139270 | NM_006989    | RASA4        | RAS p21 protein activator 4                   | 0.016  | 1.011 | 9.60E-01 | 9.60E+01 |  |
| 8139276 | NM_000290    | PGAM2        | phosphoglycerate mutase 2 (muscle)            | 0.012  | 1.008 | 9.58E-01 | 9.58E+01 |  |
| 8139281 | NM_013284    | POLM         | polymerase (DNA directed), mu                 | -0.010 | 0.993 | 9.43E-01 | 9.43E+01 |  |
| 8139299 | NM_00112721  | POLD2        | polymerase (DNA directed), delta              | -0.077 | 0.948 | 5.03E-01 | 5.03E+01 |  |
| 8139314 | NM_033508    | GCK          | glucokinase (hexokinase 4)                    | -0.021 | 0.985 | 8.89E-01 | 8.89E+01 |  |
| 8139356 | NM_015332    | NUDCD3       | NudC domain containing 3                      | 0.040  | 1.028 | 7.67E-01 | 7.67E+01 |  |
| 8139367 | NM_013389    | NPC1L1       | NPC1 (Niemann-Pick disease, type 1)           | -0.028 | 0.981 | 8.29E-01 | 8.29E+01 |  |
| 8139392 | NM_019082    | DDX56        | DEAD (Asp-Glu-Ala-Asp) box polypeptide        | -0.045 | 0.969 | 8.10E-01 | 8.10E+01 |  |
| 8139411 | NM_182547    | TMED4        | transmembrane emp24 protein translocator      | -0.063 | 0.958 | 6.77E-01 | 6.77E+01 |  |
| 8139421 | NM_012412    | H2AFV        | H2A histone family, member V                  | -0.105 | 0.930 | 1.16E-01 | 1.16E+01 |  |
| 8139430 | NM_033224    | PURB         | purine-rich element binding protein           | -0.118 | 0.921 | 1.01E-02 | 1.01E+00 |  |
| 8139433 | NM_033054    | MYO1G        | myosin IG                                     | -0.163 | 0.893 | 4.20E-01 | 4.20E+01 |  |
| 8139456 | NR_002952    | SNORA9       | small nucleolar RNA, H/ACA box 9              | -0.029 | 0.980 | 9.53E-01 | 9.53E+01 |  |
| 8139458 | AK096229     | LOC100128364 | hypothetical LOC100128364                     | 0.107  | 1.077 | 7.08E-01 | 7.08E+01 |  |
| 8139460 | NM_00114633  | NACAD        | NAC alpha domain containing                   | -0.079 | 0.947 | 4.39E-01 | 4.39E+01 |  |
| 8139468 | NM_004749    | TBRG4        | transforming growth factor beta receptor      | 0.032  | 1.022 | 8.24E-01 | 8.24E+01 |  |
| 8139482 | NR_002919    | SNORA5A      | small nucleolar RNA, H/ACA box 5              | -0.032 | 0.978 | 9.53E-01 | 9.53E+01 |  |
| 8139484 | NR_002991    | SNORA5C      | small nucleolar RNA, H/ACA box 5              | 0.065  | 1.046 | 6.06E-01 | 6.06E+01 |  |
| 8139486 | NR_002990    | SNORA5B      | small nucleolar RNA, H/ACA box 5              | -0.081 | 0.945 | 5.34E-01 | 5.34E+01 |  |
| 8139488 | NM_00101339  | IGFBP3       | insulin-like growth factor binding protein 3  | 0.017  | 1.012 | 9.09E-01 | 9.09E+01 |  |
| 8139592 | NM_004507    | HUS1         | HUS1 checkpoint homolog (S. pombe)            | -0.014 | 0.990 | 9.52E-01 | 9.52E+01 |  |
| 8139656 | NM_00100155  | GRB10        | growth factor receptor-bound protein 10       | 0.005  | 1.003 | 9.85E-01 | 9.85E+01 |  |
| 8139706 | NM_014302    | SEC61G       | Sec61 gamma subunit                           | 0.019  | 1.013 | 9.16E-01 | 9.16E+01 |  |
| 8139712 | NM_030796    | VOPP1        | vesicular, overexpressed in cancer            | 0.022  | 1.015 | 8.96E-01 | 8.96E+01 |  |
| 8139723 | NR_027342    | FKBP9L       | FK506 binding protein 9-like                  | -0.052 | 0.964 | 6.50E-01 | 6.50E+01 |  |
| 8139737 | NM_004577    | PSPH         | phosphoserine phosphatase                     | 0.045  | 1.032 | 7.27E-01 | 7.27E+01 |  |
| 8139758 | NM_016139    | CHCHD2       | coiled-coil-helix-coiled-coil-helix domain    | -0.003 | 0.998 | 9.89E-01 | 9.89E+01 |  |
| 8139763 | NM_00114571  | LOC389493    | hypothetical protein LOC389493                | 0.013  | 1.009 | 9.24E-01 | 9.24E+01 |  |
| 8139769 | AK125790     | LOC401357    | hypothetical LOC401357                        | 0.049  | 1.034 | 6.81E-01 | 6.81E+01 |  |
| 8139778 | ---          | ---          | ---                                           | -0.096 | 0.936 | 5.04E-01 | 5.04E+01 |  |
| 8139780 | ---          | ---          | ---                                           | -0.305 | 0.809 | 2.96E-01 | 2.96E+01 |  |
| 8139796 | AK128010     | LOC441233    | hypothetical LOC441233                        | -0.179 | 0.883 | 5.36E-01 | 5.36E+01 |  |
| 8139816 | ---          | ---          | ---                                           | -0.117 | 0.922 | 6.65E-01 | 6.65E+01 |  |
| 8139828 | BC063653     | LOC441239    | hypothetical protein LOC441239                | -0.052 | 0.965 | 6.00E-01 | 6.00E+01 |  |
| 8139840 | NM_00100725  | ERV3         | endogenous retroviral sequence 3              | 0.142  | 1.104 | 7.23E-01 | 7.23E+01 |  |
| 8139859 | NM_000181    | GUSB         | glucuronidase, beta                           | 0.115  | 1.083 | 3.31E-01 | 3.31E+01 |  |
| 8139879 | ---          | ---          | ---                                           | -0.124 | 0.918 | 3.95E-01 | 3.95E+01 |  |
| 8139883 | ---          | ---          | ---                                           | 0.002  | 1.001 | 9.91E-01 | 9.91E+01 |  |
| 8139885 | ---          | ---          | ---                                           | -0.104 | 0.930 | 6.71E-01 | 6.71E+01 |  |
| 8139887 | AK090474     | LOC441245    | hypothetical LOC441245                        | -0.001 | 0.999 | 9.93E-01 | 9.93E+01 |  |
| 8139889 | ---          | ---          | ---                                           | -0.110 | 0.927 | 5.96E-01 | 5.96E+01 |  |
| 8139891 | NM_016038    | SBD5         | Shwachman-Bodian-Diamond syndrome             | -0.024 | 0.984 | 9.15E-01 | 9.15E+01 |  |
| 8139896 | NR_022007    | PMS2L4       | postmeiotic segregation increased 4           | 0.036  | 1.026 | 8.67E-01 | 8.67E+01 |  |
| 8139907 | ---          | ---          | ---                                           | -0.112 | 0.925 | 3.87E-01 | 3.87E+01 |  |
| 8139917 | NM_022479    | WBSR17       | Williams-Beuren syndrome chromosome 17        | -0.058 | 0.961 | 6.38E-01 | 6.38E+01 |  |
| 8139919 | ---          | ---          | ---                                           | -0.005 | 0.997 | 9.83E-01 | 9.83E+01 |  |
| 8139935 | NM_00114544  | TYW1B        | tRNA-yW synthesizing protein 1 homolog        | 0.022  | 1.016 | 9.54E-01 | 9.54E+01 |  |
| 8139943 | NR_003666    | SPDYE7P      | speedy homolog E7 (Xenopus laevis)            | 0.008  | 1.006 | 9.82E-01 | 9.82E+01 |  |
| 8139947 | NM_032158    | NSUN5C       | NOL1/NOP2/Sun domain family, member 5C        | -0.012 | 0.992 | 9.54E-01 | 9.54E+01 |  |
| 8139966 | NM_198924    | TRIM73       | tripartite motif-containing 73                | -0.016 | 0.989 | 9.26E-01 | 9.26E+01 |  |
| 8139977 | NM_00101373  | STAG3L3      | stromal antigen 3-like 3                      | -0.039 | 0.973 | 8.06E-01 | 8.06E+01 |  |
| 8139996 | NR_003664    | SPDYE8P      | speedy homolog E8 (Xenopus laevis)            | 0.048  | 1.034 | 6.82E-01 | 6.82E+01 |  |
| 8140009 | NR_003664    | SPDYE8P      | speedy homolog E8 (Xenopus laevis)            | 0.053  | 1.037 | 6.74E-01 | 6.74E+01 |  |
| 8140020 | NM_018044    | NSUN5        | NOL1/NOP2/Sun domain family, member 5         | -0.028 | 0.981 | 8.37E-01 | 8.37E+01 |  |
| 8140028 | NM_178125    | TRIM50       | tripartite motif-containing 50                | -0.115 | 0.923 | 2.91E-01 | 2.91E+01 |  |
| 8140037 | NM_032408    | BAZ1B        | bromodomain adjacent to zinc finger domain 1B | -0.018 | 0.988 | 8.84E-01 | 8.84E+01 |  |
| 8140061 | NM_001707    | BCL7B        | B-cell CLL/lymphoma 7B                        | -0.008 | 0.995 | 9.77E-01 | 9.77E+01 |  |
| 8140070 | NM_012453    | TBL2         | transducin (beta)-like 2                      | 0.063  | 1.045 | 2.27E-01 | 2.27E+01 |  |
| 8140085 | NM_032951    | MLXIPL       | MLX interacting protein-like                  | 0.016  | 1.011 | 9.23E-01 | 9.23E+01 |  |
| 8140107 | NM_032317    | DNAJC30      | DnaJ (Hsp40) homolog, subfamily 30            | 0.003  | 1.002 | 9.87E-01 | 9.87E+01 |  |

|         |                           |                             |                                      |        |       |          |          |  |  |
|---------|---------------------------|-----------------------------|--------------------------------------|--------|-------|----------|----------|--|--|
| 8140113 | NM_004603                 | STX1A                       | syntaxin 1A (brain)                  | -0.024 | 0.983 | 9.06E-01 | 9.06E+01 |  |  |
| 8140129 | NR_026912                 | ABHD11                      | abhydrolase domain containing 11     | 0.032  | 1.023 | 7.87E-01 | 7.87E+01 |  |  |
| 8140140 | NM_001306                 | CLDN3                       | claudin 3                            | -0.005 | 0.997 | 9.78E-01 | 9.78E+01 |  |  |
| 8140144 | NM_152559                 | WBSCR27                     | Williams Beuren syndrome chrom       | -0.041 | 0.972 | 7.05E-01 | 7.05E+01 |  |  |
| 8140151 | NM_181471                 | RFC2                        | replication factor C (activator 1) 2 | 0.088  | 1.063 | 7.02E-01 | 7.02E+01 |  |  |
| 8140170 | NM_173537                 | GTF2IRD2                    | GTF2I repeat domain containing 2     | -0.001 | 1.000 | 9.99E-01 | 9.99E+01 |  |  |
| 8140196 | NM_00102520               | STAG3L2                     | stromal antigen 3-like 2             | -0.033 | 0.977 | 8.46E-01 | 8.46E+01 |  |  |
| 8140211 | NR_003664                 | SPDYE8P                     | speedy homolog E8 (Xenopus laevis)   | 0.058  | 1.041 | 5.59E-01 | 5.59E+01 |  |  |
| 8140220 | NM_030798                 | WBSCR16                     | Williams-Beuren syndrome chrom       | -0.005 | 0.996 | 9.77E-01 | 9.77E+01 |  |  |
| 8140239 | NR_003613                 | PMS2L1                      | postmeiotic segregation increased    | 0.061  | 1.043 | 7.53E-01 | 7.53E+01 |  |  |
| 8140249 | NM_00114506               | GATSL1                      | GATS protein-like 1                  | -0.080 | 0.946 | 5.51E-01 | 5.51E+01 |  |  |
| 8140258 | NR_027775                 | PMS2L5                      | postmeiotic segregation increased    | 0.045  | 1.032 | 8.16E-01 | 8.16E+01 |  |  |
| 8140269 | NR_027775                 | PMS2L5                      | postmeiotic segregation increased    | 0.056  | 1.040 | 7.79E-01 | 7.79E+01 |  |  |
| 8140280 | NR_003614                 | PMS2L2                      | postmeiotic segregation increased    | 0.056  | 1.040 | 7.77E-01 | 7.77E+01 |  |  |
| 8140291 | NM_003602                 | FKBP6                       | FK506 binding protein 6, 36kDa       | -0.077 | 0.948 | 7.70E-01 | 7.70E+01 |  |  |
| 8140297 | NM_00109941               | POM121C                     | POM121 membrane glycoprotein         | -0.100 | 0.933 | 1.55E-01 | 1.55E+01 |  |  |
| 8140311 | NM_005395                 | PMS2L3                      | postmeiotic segregation increased    | -0.005 | 0.996 | 9.86E-01 | 9.86E+01 |  |  |
| 8140319 | NM_005338                 | HIP1                        | huntingtin interacting protein 1     | -0.061 | 0.959 | 8.04E-01 | 8.04E+01 |  |  |
| 8140356 | ---                       | ---                         | ---                                  | -0.006 | 0.996 | 9.86E-01 | 9.86E+01 |  |  |
| 8140371 | NM_031925                 | TMEM120A                    | transmembrane protein 120A           | -0.053 | 0.964 | 7.03E-01 | 7.03E+01 |  |  |
| 8140386 | NM_016086                 | STYXL1                      | serine/threonine/tyrosine interact   | 0.115  | 1.083 | 6.98E-01 | 6.98E+01 |  |  |
| 8140398 | NM_012479                 | YWHAG                       | tyrosine 3-monooxygenase/tryptoph    | 0.053  | 1.037 | 7.35E-01 | 7.35E+01 |  |  |
| 8140403 | NM_080744                 | SRCRB4D                     | scavenger receptor cysteine rich d   | -0.058 | 0.961 | 6.56E-01 | 6.56E+01 |  |  |
| 8140420 | NR_003262 // PSL2A // FDP | MGC44478 // MGC44478 // MGC |                                      | 0.013  | 1.009 | 9.65E-01 | 9.65E+01 |  |  |
| 8140424 | NM_175064                 | SPDYE1                      | speedy homolog E1 (Xenopus laevis)   | 0.056  | 1.039 | 7.66E-01 | 7.66E+01 |  |  |
| 8140433 | NM_012230                 | POMZP3                      | POM (POM121 homolog, rat) and        | -0.106 | 0.929 | 1.79E-01 | 1.79E+01 |  |  |
| 8140443 | NR_003262 // PSL2A // FDP | MGC44478 // MGC44478 // MGC |                                      | 0.032  | 1.022 | 8.95E-01 | 8.95E+01 |  |  |
| 8140445 | NR_003664                 | SPDYE8P                     | speedy homolog E8 (Xenopus laevis)   | 0.054  | 1.038 | 6.00E-01 | 6.00E+01 |  |  |
| 8140454 | NM_175064                 | SPDYE1                      | speedy homolog E1 (Xenopus laevis)   | 0.055  | 1.039 | 7.72E-01 | 7.72E+01 |  |  |
| 8140461 | NM_00114526               | FAM185A                     | family with sequence similarity 18   | -0.057 | 0.961 | 7.44E-01 | 7.44E+01 |  |  |
| 8140468 | NM_017439                 | PION                        | pigeon homolog (Drosophila)          | 0.325  | 1.252 | 1.17E-01 | 1.17E+01 |  |  |
| 8140478 | NM_017439                 | PION                        | pigeon homolog (Drosophila)          | 0.427  | 1.345 | 6.36E-02 | 6.36E+00 |  |  |
| 8140500 | NM_032936                 | TMEM60                      | transmembrane protein 60             | 0.140  | 1.102 | 3.44E-01 | 3.44E+01 |  |  |
| 8140534 | NM_006379                 | SEMA3C                      | sema domain, immunoglobulin do       | -0.095 | 0.936 | 8.41E-01 | 8.41E+01 |  |  |
| 8140707 | ---                       | ---                         | ---                                  | -0.038 | 0.974 | 8.78E-01 | 8.78E+01 |  |  |
| 8140709 | NM_00114274               | KIAA1324L                   | KIAA1324-like                        | 0.220  | 1.165 | 5.29E-01 | 5.29E+01 |  |  |
| 8140730 | NM_024315                 | C7orf23                     | chromosome 7 open reading fram       | -0.094 | 0.937 | 5.98E-01 | 5.98E+01 |  |  |
| 8140737 | ---                       | ---                         | ---                                  | -0.137 | 0.909 | 5.71E-01 | 5.71E+01 |  |  |
| 8140782 | NM_000927                 | ABCB1                       | ATP-binding cassette, sub-family B   | 0.057  | 1.040 | 8.79E-01 | 8.79E+01 |  |  |
| 8140828 | NM_003130                 | SRI                         | sorcin                               | 0.069  | 1.049 | 6.66E-01 | 6.66E+01 |  |  |
| 8140859 | NM_006980                 | MTERF                       | mitochondrial transcription termin   | -0.012 | 0.991 | 9.64E-01 | 9.64E+01 |  |  |
| 8140864 | NM_000786                 | CYP51A1                     | cytochrome P450, family 51, subfa    | -0.044 | 0.970 | 8.83E-01 | 8.83E+01 |  |  |
| 8140878 | NM_194455                 | KRIT1                       | KRIT1, ankyrin repeat containing     | -0.006 | 0.996 | 9.72E-01 | 9.72E+01 |  |  |
| 8140909 | NM_014590                 | ERVWE1                      | endogenous retroviral family W, e    | 0.168  | 1.124 | 4.70E-01 | 4.70E+01 |  |  |
| 8140915 | NM_000466                 | PEX1                        | peroxisomal biogenesis factor 1      | -0.047 | 0.968 | 7.89E-01 | 7.89E+01 |  |  |
| 8140942 | NM_00104005               | FAM133B                     | family with sequence similarity 13   | 0.045  | 1.032 | 6.94E-01 | 6.94E+01 |  |  |
| 8140955 | NM_001259                 | CDK6                        | cyclin-dependent kinase 6            | 0.073  | 1.052 | 8.04E-01 | 8.04E+01 |  |  |
| 8140965 | ---                       | ---                         | ---                                  | -0.026 | 0.982 | 8.88E-01 | 8.88E+01 |  |  |
| 8140967 | NM_017654                 | SAMD9                       | sterile alpha motif domain contain   | 0.126  | 1.091 | 6.48E-01 | 6.48E+01 |  |  |
| 8140971 | NM_152703                 | SAMD9L                      | sterile alpha motif domain contain   | 0.291  | 1.224 | 2.00E-01 | 2.00E+01 |  |  |
| 8141024 | NM_005868                 | BET1                        | blocked early in transport 1 homo    | -0.045 | 0.969 | 7.88E-01 | 7.88E+01 |  |  |
| 8141050 | NM_001006                 | RPS3A                       | ribosomal protein S3A                | 0.006  | 1.004 | 9.64E-01 | 9.64E+01 |  |  |
| 8141076 | NM_000305                 | PON2                        | paraoxonase 2                        | 0.091  | 1.065 | 3.33E-01 | 3.33E+01 |  |  |
| 8141133 | NM_006304                 | SHFM1                       | split hand/foot malformation (ect    | 0.031  | 1.022 | 7.47E-01 | 7.47E+01 |  |  |
| 8141140 | NM_005221                 | DLX5                        | distal-less homeobox 5               | -0.067 | 0.955 | 5.27E-01 | 5.27E+01 |  |  |
| 8141150 | NM_133436                 | ASNS                        | asparagine synthetase                | -0.074 | 0.950 | 7.08E-01 | 7.08E+01 |  |  |
| 8141166 | AK125166                  | LOC441268                   | hypothetical LOC441268               | 0.008  | 1.005 | 9.72E-01 | 9.72E+01 |  |  |
| 8141169 | NR_002822                 | MGC72080                    | MGC72080 pseudogene                  | -0.056 | 0.962 | 6.35E-01 | 6.35E+01 |  |  |
| 8141173 | NM_006188                 | OCM2                        | oncomodulin 2                        | -0.117 | 0.922 | 7.64E-01 | 7.64E+01 |  |  |
| 8141180 | NM_015395                 | TECPR1                      | tectonin beta-propeller repeat cor   | -0.009 | 0.994 | 9.65E-01 | 9.65E+01 |  |  |
| 8141222 | NM_001006                 | RPS3A                       | ribosomal protein S3A                | 0.013  | 1.009 | 9.16E-01 | 9.16E+01 |  |  |
| 8141228 | NM_00113445               | TMEM130                     | transmembrane protein 130            | 0.005  | 1.003 | 9.77E-01 | 9.77E+01 |  |  |
| 8141241 | NM_020429                 | SMURF1                      | SMAD specific E3 ubiquitin protein   | -0.070 | 0.952 | 6.38E-01 | 6.38E+01 |  |  |
| 8141273 | NM_014891                 | PDAP1                       | PDGFA associated protein 1           | -0.015 | 0.990 | 9.51E-01 | 9.51E+01 |  |  |
| 8141281 | ---                       | ---                         | ---                                  | -0.049 | 0.966 | 8.84E-01 | 8.84E+01 |  |  |
| 8141283 | NM_015545                 | PTCD1                       | pentatricopeptide repeat domain      | -0.038 | 0.974 | 7.85E-01 | 7.85E+01 |  |  |
| 8141295 | NM_004889                 | ATP5J2                      | ATP synthase, H+ transporting, mi    | 0.044  | 1.031 | 7.94E-01 | 7.94E+01 |  |  |
| 8141303 | ---                       | ---                         | ---                                  | -0.006 | 0.996 | 9.78E-01 | 9.78E+01 |  |  |
| 8141305 | NM_032164                 | ZNF394                      | zinc finger protein 394              | -0.063 | 0.957 | 7.62E-01 | 7.62E+01 |  |  |
| 8141363 | NM_033017                 | TRIM4                       | tripartite motif-containing 4        | 0.031  | 1.022 | 8.95E-01 | 8.95E+01 |  |  |
| 8141371 | NM_181538                 | GJC3                        | gap junction protein, gamma 3, 30    | 0.071  | 1.051 | 4.73E-01 | 4.73E+01 |  |  |
| 8141380 | NM_032924                 | ZNF3                        | zinc finger protein 3                | 0.030  | 1.021 | 8.43E-01 | 8.43E+01 |  |  |
| 8141395 | NM_005916                 | MCM7                        | minichromosome maintenance co        | -0.065 | 0.956 | 7.78E-01 | 7.78E+01 |  |  |
| 8141419 | ---                       | ---                         | ---                                  | -0.091 | 0.939 | 4.68E-01 | 4.68E+01 |  |  |
| 8141423 | ---                       | ---                         | ---                                  | 0.013  | 1.009 | 9.53E-01 | 9.53E+01 |  |  |
| 8141425 | NM_005641                 | TAF6                        | TAF6 RNA polymerase II, TATA box     | -0.041 | 0.972 | 7.39E-01 | 7.39E+01 |  |  |
| 8141445 | BC015722                  | C7orf43                     | chromosome 7 open reading fram       | 0.000  | 1.000 | 1.00E+00 | 1.00E+02 |  |  |

|         |              |          |                                      |        |       |          |          |
|---------|--------------|----------|--------------------------------------|--------|-------|----------|----------|
| 8141459 | NM_024637    | GAL3ST4  | galactose-3-O-sulfotransferase 4     | -0.189 | 0.877 | 2.94E-01 | 2.94E+01 |
| 8141466 | NM_152742    | GPC2     | glypican 2                           | -0.059 | 0.960 | 4.72E-01 | 4.72E+01 |
| 8141477 | NM_178831    | GATS     | GATS, stromal antigen 3 opposite     | -0.058 | 0.961 | 6.70E-01 | 6.70E+01 |
| 8141490 | NR_003613    | PMS2L1   | postmeiotic segregation increased    | 0.201  | 1.150 | 2.54E-01 | 2.54E+01 |
| 8141517 | BC026269     | C7orf47  | chromosome 7 open reading fram       | -0.040 | 0.972 | 8.25E-01 | 8.25E+01 |
| 8141522 | BC031966     | C7orf61  | chromosome 7 open reading fram       | -0.070 | 0.952 | 5.20E-01 | 5.20E+01 |
| 8141526 | NM_030935    | TSC22D4  | TSC22 domain family, member 4        | 0.025  | 1.017 | 8.63E-01 | 8.63E+01 |
| 8141535 | NM_002319    | LRCH4    | leucine-rich repeats and calponin    | 0.009  | 1.007 | 9.62E-01 | 9.62E+01 |
| 8141560 | NM_003227    | TFR2     | transferrin receptor 2               | -0.040 | 0.973 | 7.72E-01 | 7.72E+01 |
| 8141580 | NM_016188    | ACTL6B   | actin-like 6B                        | 0.018  | 1.013 | 8.93E-01 | 8.93E+01 |
| 8141595 | NM_022574    | GIGYF1   | GRB10 interacting GYF protein 1      | -0.031 | 0.979 | 7.95E-01 | 7.95E+01 |
| 8141625 | NM_004444    | EPHB4    | EPH receptor B4                      | -0.031 | 0.979 | 8.55E-01 | 8.55E+01 |
| 8141643 | NM_00101507  | UFSP1    | UFM1-specific peptidase 1 (non-fu    | -0.018 | 0.988 | 9.12E-01 | 9.12E+01 |
| 8141648 | NM_015831    | ACHE     | acetylcholinesterase (Yt blood gro   | -0.073 | 0.951 | 4.88E-01 | 4.88E+01 |
| 8141659 | ---          | ---      | ---                                  | 0.084  | 1.060 | 3.70E-01 | 3.70E+01 |
| 8141664 | NM_003378    | VEGF     | VEGF nerve growth factor inducible   | -0.060 | 0.960 | 6.15E-01 | 6.15E+01 |
| 8141676 | NM_178176    | MOGAT3   | monoacylglycerol O-acyltransferas    | 0.008  | 1.005 | 9.64E-01 | 9.64E+01 |
| 8141688 | NM_001084    | PLOD3    | procollagen-lysine, 2-oxoglutarate   | 0.152  | 1.111 | 2.56E-01 | 2.56E+01 |
| 8141708 | NM_014343    | CLDN15   | claudin 15                           | -0.047 | 0.968 | 6.87E-01 | 6.87E+01 |
| 8141717 | NM_016068    | FIS1     | fission 1 (mitochondrial outer men   | -0.001 | 1.000 | 9.98E-01 | 9.98E+01 |
| 8141728 | NM_022777    | RABL5    | RAB, member RAS oncogene famil       | -0.142 | 0.906 | 1.02E-01 | 1.02E+01 |
| 8141748 | ---          | ---      | ---                                  | 0.029  | 1.020 | 8.99E-01 | 8.99E+01 |
| 8141750 | NM_00103161  | SPDYE2   | speedy homolog E2 (Xenopus laevis    | 0.027  | 1.019 | 9.27E-01 | 9.27E+01 |
| 8141757 | NM_017621    | ALKBH4   | alkB, alkylation repair homolog 4 (  | -0.040 | 0.972 | 7.63E-01 | 7.63E+01 |
| 8141762 | NM_006234    | POLR2J   | polymerase (RNA) II (DNA directed    | 0.075  | 1.053 | 5.91E-01 | 5.91E+01 |
| 8141765 | ---          | ---      | ---                                  | 0.013  | 1.009 | 9.67E-01 | 9.67E+01 |
| 8141768 | NM_006989    | RASA4    | RAS p21 protein activator 4          | 0.068  | 1.048 | 3.80E-01 | 3.80E+01 |
| 8141791 | NM_00109761  | POLR2J3  | polymerase (RNA) II (DNA directed    | -0.052 | 0.965 | 8.78E-01 | 8.78E+01 |
| 8141795 | NM_00109761  | POLR2J3  | polymerase (RNA) II (DNA directed    | 0.008  | 1.006 | 9.81E-01 | 9.81E+01 |
| 8141803 | NM_006989    | RASA4    | RAS p21 protein activator 4          | 0.087  | 1.062 | 2.35E-01 | 2.35E+01 |
| 8141829 | NM_032959    | POLR2J2  | polymerase (RNA) II (DNA directed    | -0.019 | 0.987 | 9.48E-01 | 9.48E+01 |
| 8141843 | NM_006989    | RASA4    | RAS p21 protein activator 4          | 0.131  | 1.095 | 5.07E-01 | 5.07E+01 |
| 8141896 | ---          | ---      | ---                                  | 0.070  | 1.050 | 6.24E-01 | 6.24E+01 |
| 8141898 | NM_014377    | DNAJC2   | DnaJ (Hsp40) homolog, subfamily      | 0.035  | 1.025 | 8.02E-01 | 8.02E+01 |
| 8142017 | ---          | ---      | ---                                  | 0.083  | 1.059 | 2.81E-01 | 2.81E+01 |
| 8142036 | NM_182691    | SRPK2    | SFRS protein kinase 2                | 0.051  | 1.036 | 7.27E-01 | 7.27E+01 |
| 8142059 | ---          | ---      | ---                                  | 0.062  | 1.044 | 6.04E-01 | 6.04E+01 |
| 8142084 | CR601484     | YBX1P2   | Y box binding protein 1 pseudogen    | 0.034  | 1.024 | 8.34E-01 | 8.34E+01 |
| 8142087 | NM_020725    | ATXN7L1  | ataxin 7-like 1                      | -0.101 | 0.932 | 6.55E-01 | 6.55E+01 |
| 8142096 | NM_020725    | ATXN7L1  | ataxin 7-like 1                      | -0.078 | 0.948 | 8.28E-01 | 8.28E+01 |
| 8142098 | NM_020725    | ATXN7L1  | ataxin 7-like 1                      | -0.109 | 0.927 | 8.05E-01 | 8.05E+01 |
| 8142100 | NM_020725    | ATXN7L1  | ataxin 7-like 1                      | -0.088 | 0.941 | 7.50E-01 | 7.50E+01 |
| 8142102 | NM_020725    | ATXN7L1  | ataxin 7-like 1                      | -0.057 | 0.961 | 8.62E-01 | 8.62E+01 |
| 8142104 | NM_152749    | ATXN7L1  | ataxin 7-like 1                      | -0.143 | 0.906 | 3.32E-01 | 3.32E+01 |
| 8142110 | NM_006754    | SYPL1    | synaptophysin-like 1                 | 0.120  | 1.087 | 1.66E-01 | 1.66E+01 |
| 8142136 | NM_175884    | FLJ36031 | hypothetical protein FLJ36031        | -0.079 | 0.947 | 4.25E-01 | 4.25E+01 |
| 8142143 | NM_006348    | COG5     | component of oligomeric golgi cor    | 0.061  | 1.043 | 5.95E-01 | 5.95E+01 |
| 8142230 | ---          | ---      | ---                                  | -0.034 | 0.977 | 8.36E-01 | 8.36E+01 |
| 8142307 | NM_015723    | PNPLA8   | patatin-like phospholipase domain    | 0.076  | 1.054 | 5.25E-01 | 5.25E+01 |
| 8142324 | NM_00113047  | THAP5    | THAP domain containing 5             | -0.019 | 0.987 | 9.46E-01 | 9.46E+01 |
| 8142343 | ---          | ---      | ---                                  | -0.063 | 0.957 | 9.30E-01 | 9.30E+01 |
| 8142345 | NM_014705    | DOCK4    | dedicator of cytokinesis 4           | 0.066  | 1.047 | 9.24E-01 | 9.24E+01 |
| 8142405 | ---          | ---      | ---                                  | -0.023 | 0.984 | 9.53E-01 | 9.53E+01 |
| 8142407 | NM_022484    | TMEM168  | transmembrane protein 168            | 0.049  | 1.034 | 7.62E-01 | 7.62E+01 |
| 8142415 | NM_152556    | C7orf60  | chromosome 7 open reading fram       | -0.070 | 0.953 | 7.26E-01 | 7.26E+01 |
| 8142446 | ---          | ---      | ---                                  | -0.095 | 0.936 | 5.34E-01 | 5.34E+01 |
| 8142464 | ---          | ---      | ---                                  | 0.086  | 1.062 | 7.35E-01 | 7.35E+01 |
| 8142468 | NM_153649    | TPM3     | tropomyosin 3                        | 0.030  | 1.021 | 7.46E-01 | 7.46E+01 |
| 8142540 | NM_014888    | FAM3C    | family with sequence similarity 3,   | 0.188  | 1.139 | 2.37E-02 | 2.37E+00 |
| 8142554 | NM_005763    | AASS     | aminoadipate-semialdehyde synth      | -0.067 | 0.955 | 7.30E-01 | 7.30E+01 |
| 8142580 | NM_00102461  | FEZF1    | FEZ family zinc finger 1             | 0.054  | 1.038 | 6.30E-01 | 6.30E+01 |
| 8142663 | NM_005000    | NDUFA5   | NADH dehydrogenase (ubiquinone       | -0.026 | 0.982 | 8.94E-01 | 8.94E+01 |
| 8142671 | NM_003941    | WASL     | Wiskott-Aldrich syndrome-like        | 0.019  | 1.013 | 9.00E-01 | 9.00E+01 |
| 8142730 | NM_176814    | ZNF800   | zinc finger protein 800              | 0.011  | 1.008 | 9.50E-01 | 9.50E+01 |
| 8142740 | NM_024523    | GCC1     | GRIP and coiled-coil domain conta    | 0.023  | 1.016 | 8.90E-01 | 8.90E+01 |
| 8142747 | NM_006193    | PAX4     | paired box 4                         | 0.004  | 1.003 | 9.85E-01 | 9.85E+01 |
| 8142763 | ---          | ---      | ---                                  | 0.175  | 1.129 | 2.72E-01 | 2.72E+01 |
| 8142765 | NM_022143    | LRRC4    | leucine rich repeat containing 4     | 0.037  | 1.026 | 8.06E-01 | 8.06E+01 |
| 8142770 | ENST00000424 | MGC27345 | hypothetical protein MGC27345        | 0.114  | 1.082 | 5.52E-01 | 5.52E+01 |
| 8142774 | NM_018077    | RBM28    | RNA binding motif protein 28         | -0.018 | 0.988 | 9.17E-01 | 9.17E+01 |
| 8142795 | NM_000883    | IMPDH1   | IMP (inosine monophosphate) def      | -0.027 | 0.981 | 8.10E-01 | 8.10E+01 |
| 8142814 | NM_001708    | OPN1SW   | opsin 1 (cone pigments), short-wa    | 0.027  | 1.019 | 9.33E-01 | 9.33E+01 |
| 8142821 | NM_00113591  | KCP      | kielin/chordin-like protein          | 0.028  | 1.019 | 7.92E-01 | 7.92E+01 |
| 8142830 | NM_199349    | KCP      | kielin/chordin-like protein          | -0.062 | 0.958 | 6.00E-01 | 6.00E+01 |
| 8142852 | NM_012470    | TNPO3    | transportin 3                        | 0.010  | 1.007 | 9.66E-01 | 9.66E+01 |
| 8142878 | NM_139286    | CDC26    | cell division cycle 26 homolog (S. d | -0.020 | 0.986 | 8.67E-01 | 8.67E+01 |
| 8142886 | NM_003344    | UBE2H    | ubiquitin-conjugating enzyme E2H     | -0.076 | 0.948 | 5.34E-01 | 5.34E+01 |

|         |              |           |                                        |        |       |          |          |  |  |
|---------|--------------|-----------|----------------------------------------|--------|-------|----------|----------|--|--|
| 8142899 | NM_016478    | ZC3HC1    | zinc finger, C3HC-type containing      | 0.020  | 1.014 | 8.82E-01 | 8.82E+01 |  |  |
| 8142912 | NM_032842    | TMEM209   | transmembrane protein 209              | -0.009 | 0.994 | 9.77E-01 | 9.77E+01 |  |  |
| 8142945 | NM_012133    | COPG2     | coatomer protein complex, subun        | 0.036  | 1.025 | 8.34E-01 | 8.34E+01 |  |  |
| 8142971 | NM_138693    | KLF14     | Kruppel-like factor 14                 | 0.034  | 1.023 | 7.29E-01 | 7.29E+01 |  |  |
| 8142979 | ---          | ---       | ---                                    | -0.061 | 0.959 | 8.77E-01 | 8.77E+01 |  |  |
| 8142981 | NM_00101811  | PODXL     | podocalyxin-like                       | -0.004 | 0.997 | 9.84E-01 | 9.84E+01 |  |  |
| 8142993 | ---          | ---       | ---                                    | 0.047  | 1.033 | 7.82E-01 | 7.82E+01 |  |  |
| 8142997 | NM_020911    | PLXNA4    | plexin A4                              | 0.010  | 1.007 | 9.52E-01 | 9.52E+01 |  |  |
| 8143028 | NM_017812    | CHCHD3    | coiled-coil-helix-coiled-coil-helix d  | -0.107 | 0.929 | 4.92E-01 | 4.92E+01 |  |  |
| 8143035 | ---          | ---       | ---                                    | -0.017 | 0.988 | 9.53E-01 | 9.53E+01 |  |  |
| 8143038 | ---          | ---       | ---                                    | -0.109 | 0.927 | 6.71E-01 | 6.71E+01 |  |  |
| 8143040 | NM_032826    | SLC35B4   | solute carrier family 35, member 4     | -0.026 | 0.982 | 9.12E-01 | 9.12E+01 |  |  |
| 8143054 | NM_001628    | AKR1B1    | aldo-keto reductase family 1, mem      | -0.209 | 0.865 | 1.97E-01 | 1.97E+01 |  |  |
| 8143065 | NR_024185    | C7orf49   | chromosome 7 open reading fram         | -0.050 | 0.966 | 8.49E-01 | 8.49E+01 |  |  |
| 8143070 | NM_014149    | WDR91     | WD repeat domain 91                    | 0.127  | 1.092 | 1.76E-01 | 1.76E+01 |  |  |
| 8143088 | NM_013316    | CNOT4     | CCR4-NOT transcription complex,        | -0.009 | 0.994 | 9.64E-01 | 9.64E+01 |  |  |
| 8143108 | ---          | ---       | ---                                    | 0.214  | 1.160 | 5.81E-01 | 5.81E+01 |  |  |
| 8143110 | NM_012450    | SLC13A4   | solute carrier family 13 (sodium/s     | -0.016 | 0.989 | 9.27E-01 | 9.27E+01 |  |  |
| 8143132 | NM_00112861  | LUZP6     | leucine zipper protein 6               | 0.123  | 1.089 | 9.61E-02 | 9.61E+00 |  |  |
| 8143144 | NM_002825    | PTN       | pleiotrophin                           | -0.021 | 0.986 | 8.93E-01 | 8.93E+01 |  |  |
| 8143188 | NM_194071    | CREB3L2   | cAMP responsive element binding        | 0.123  | 1.089 | 1.40E-01 | 1.40E+01 |  |  |
| 8143247 | NM_020910    | KIAA1549  | ---                                    | -0.042 | 0.971 | 7.36E-01 | 7.36E+01 |  |  |
| 8143279 | NM_020119    | ZC3HAV1   | zinc finger CCHC-type, antiviral 1     | 0.035  | 1.024 | 8.12E-01 | 8.12E+01 |  |  |
| 8143296 | NM_198508    | KLRG2     | killer cell lectin-like receptor subfa | -0.093 | 0.937 | 2.12E-01 | 2.12E+01 |  |  |
| 8143307 | NM_022740    | HIPK2     | homeodomain interacting protein        | -0.127 | 0.916 | 1.97E-01 | 1.97E+01 |  |  |
| 8143327 | NM_022750    | PARP12    | poly (ADP-ribose) polymerase fam       | 0.029  | 1.020 | 9.49E-01 | 9.49E+01 |  |  |
| 8143341 | NM_030647    | JHDM1D    | jumonji C domain containing histo      | -0.023 | 0.984 | 9.28E-01 | 9.28E+01 |  |  |
| 8143365 | ---          | ---       | ---                                    | 0.090  | 1.065 | 7.18E-01 | 7.18E+01 |  |  |
| 8143367 | NM_207113    | SLC37A3   | solute carrier family 37 (glycerol-3   | -0.033 | 0.977 | 9.22E-01 | 9.22E+01 |  |  |
| 8143383 | ---          | ---       | ---                                    | 0.070  | 1.049 | 9.14E-01 | 9.14E+01 |  |  |
| 8143385 | ---          | ---       | ---                                    | 0.001  | 1.001 | 9.96E-01 | 9.96E+01 |  |  |
| 8143387 | NM_013446    | MKRN1     | makorin ring finger protein 1          | 0.110  | 1.079 | 1.59E-01 | 1.59E+01 |  |  |
| 8143417 | NM_004333    | BRAF      | v-raf murine sarcoma viral oncoge      | -0.062 | 0.958 | 6.35E-01 | 6.35E+01 |  |  |
| 8143433 | NM_016071    | MRPS33    | mitochondrial ribosomal protein S      | 0.143  | 1.104 | 4.97E-01 | 4.97E+01 |  |  |
| 8143441 | BC012493     | KIAA1147  | ---                                    | -0.008 | 0.994 | 9.76E-01 | 9.76E+01 |  |  |
| 8143459 | ---          | ---       | ---                                    | -0.248 | 0.842 | 4.61E-01 | 4.61E+01 |  |  |
| 8143461 | ---          | ---       | ---                                    | -0.083 | 0.944 | 7.09E-01 | 7.09E+01 |  |  |
| 8143518 | NM_019841    | TRPV5     | transient receptor potential cation    | -0.060 | 0.959 | 4.83E-01 | 4.83E+01 |  |  |
| 8143534 | NM_000420    | KEL       | Kell blood group, metallo-endopep      | 0.082  | 1.059 | 5.43E-01 | 5.43E+01 |  |  |
| 8143564 | NM_00103169  | FAM131B   | family with sequence similarity 13     | -0.056 | 0.962 | 5.15E-01 | 5.15E+01 |  |  |
| 8143575 | NM_005232    | EPHA1     | EPH receptor A1                        | -0.039 | 0.974 | 6.91E-01 | 6.91E+01 |  |  |
| 8143594 | ---          | ---       | ---                                    | -0.080 | 0.946 | 3.38E-01 | 3.38E+01 |  |  |
| 8143597 | ENST00000307 | FAM115A   | family with sequence similarity 11     | -0.130 | 0.914 | 8.52E-01 | 8.52E+01 |  |  |
| 8143599 | ---          | ---       | ---                                    | -0.318 | 0.802 | 6.33E-01 | 6.33E+01 |  |  |
| 8143610 | NM_005435    | ARHGEF5   | Rho guanine nucleotide exchange        | 0.015  | 1.010 | 9.29E-01 | 9.29E+01 |  |  |
| 8143627 | NM_00100528  | OR2A1     | olfactory receptor, family 2, subfa    | 0.022  | 1.016 | 9.01E-01 | 9.01E+01 |  |  |
| 8143629 | NR_002157    | OR2A9P    | olfactory receptor, family 2, subfa    | 0.040  | 1.028 | 8.85E-01 | 8.85E+01 |  |  |
| 8143635 | NM_00108041  | NOBOX     | NOBOX oogenesis homeobox               | -0.012 | 0.992 | 9.57E-01 | 9.57E+01 |  |  |
| 8143661 | ---          | ---       | ---                                    | 0.128  | 1.093 | 6.87E-01 | 6.87E+01 |  |  |
| 8143663 | NM_004456    | EZH2      | enhancer of zeste homolog 2 (Dro       | -0.088 | 0.941 | 7.07E-01 | 7.07E+01 |  |  |
| 8143684 | NM_004911    | PDIA4     | protein disulfide isomerase family     | 0.281  | 1.215 | 2.37E-02 | 2.37E+00 |  |  |
| 8143697 | NM_152411    | ZNF786    | zinc finger protein 786                | 0.049  | 1.035 | 7.39E-01 | 7.39E+01 |  |  |
| 8143708 | ---          | ---       | ---                                    | -0.016 | 0.989 | 9.07E-01 | 9.07E+01 |  |  |
| 8143714 | NM_015694    | ZNF777    | zinc finger protein 777                | -0.015 | 0.990 | 9.44E-01 | 9.44E+01 |  |  |
| 8143725 | NM_152557    | ZNF746    | zinc finger protein 746                | -0.024 | 0.983 | 8.37E-01 | 8.37E+01 |  |  |
| 8143733 | NR_027788    | ZNF767    | zinc finger family member 767          | -0.056 | 0.962 | 7.73E-01 | 7.73E+01 |  |  |
| 8143749 | NM_207336    | ZNF467    | zinc finger protein 467                | -0.033 | 0.977 | 7.76E-01 | 7.76E+01 |  |  |
| 8143759 | NM_145230    | ATP6VOE2  | ATPase, H+ transporting V0 subun       | -0.076 | 0.949 | 6.48E-01 | 6.48E+01 |  |  |
| 8143772 | NM_002889    | RARRES2   | retinoic acid receptor responder (t    | -0.053 | 0.964 | 5.13E-01 | 5.13E+01 |  |  |
| 8143781 | NM_024711    | GIMAP6    | GTPase, IMAP family member 6           | 0.136  | 1.099 | 1.09E-01 | 1.09E+01 |  |  |
| 8143788 | ---          | ---       | ---                                    | 0.028  | 1.020 | 8.71E-01 | 8.71E+01 |  |  |
| 8143803 | NM_173681    | ATG9B     | ATG9 autophagy related 9 homolo        | -0.054 | 0.963 | 5.20E-01 | 5.20E+01 |  |  |
| 8143825 | NM_000238    | KCNH2     | potassium voltage-gated channel,       | -0.054 | 0.963 | 6.06E-01 | 6.06E+01 |  |  |
| 8143850 | NM_004935    | CDK5      | cyclin-dependent kinase 5              | -0.152 | 0.900 | 3.06E-01 | 3.06E+01 |  |  |
| 8143863 | NM_006712    | FASTK     | Fas-activated serine/threonine kin     | -0.064 | 0.956 | 4.31E-01 | 4.31E+01 |  |  |
| 8143879 | NM_00113604  | TMUB1     | transmembrane and ubiquitin-like       | -0.031 | 0.978 | 8.41E-01 | 8.41E+01 |  |  |
| 8143885 | NM_00109883  | GBX1      | gastrulation brain homeobox 1          | 0.037  | 1.026 | 7.87E-01 | 7.87E+01 |  |  |
| 8143887 | NM_00114245  | ASB10     | ankyrin repeat and SOCS box-cont       | 0.015  | 1.010 | 9.23E-01 | 9.23E+01 |  |  |
| 8143899 | ---          | ---       | ---                                    | 0.097  | 1.070 | 7.36E-01 | 7.36E+01 |  |  |
| 8143905 | NM_007189    | ABCF2     | ATP-binding cassette, sub-family F     | -0.097 | 0.935 | 4.06E-01 | 4.06E+01 |  |  |
| 8143919 | NM_00100380  | SMARCD3   | SWI/SNF related, matrix associate      | -0.010 | 0.993 | 9.53E-01 | 9.53E+01 |  |  |
| 8143937 | NM_016118    | NUB1      | negative regulator of ubiquitin-like   | 0.014  | 1.010 | 9.50E-01 | 9.50E+01 |  |  |
| 8143939 | AK127717     | LOC401433 | hypothetical LOC401433                 | 0.026  | 1.018 | 8.75E-01 | 8.75E+01 |  |  |
| 8143941 | NM_198285    | WDR86     | WD repeat domain 86                    | -0.078 | 0.947 | 5.36E-01 | 5.36E+01 |  |  |
| 8143949 | NM_144727    | CRYGN     | crystallin, gamma N                    | -0.013 | 0.991 | 9.53E-01 | 9.53E+01 |  |  |
| 8143955 | ---          | ---       | ---                                    | -0.151 | 0.901 | 4.34E-01 | 4.34E+01 |  |  |
| 8143957 | NM_005614    | RHEB      | Ras homolog enriched in brain          | 0.188  | 1.139 | 3.27E-01 | 3.27E+01 |  |  |

|         |                          |             |                                      |        |       |          |          |  |  |
|---------|--------------------------|-------------|--------------------------------------|--------|-------|----------|----------|--|--|
| 8143961 | NM_016203                | PRKAG2      | protein kinase, AMP-activated, ga    | 0.078  | 1.056 | 6.00E-01 | 6.00E+01 |  |  |
| 8143984 | ---                      | ---         | ---                                  | 0.093  | 1.067 | 4.32E-01 | 4.32E+01 |  |  |
| 8143986 | ---                      | ---         | ---                                  | -0.127 | 0.916 | 4.60E-01 | 4.60E+01 |  |  |
| 8143988 | NM_170606                | MLL3        | myeloid/lymphoid or mixed-lineag     | -0.008 | 0.995 | 9.67E-01 | 9.67E+01 |  |  |
| 8144044 | AK124285                 | FLJ42291    | hypothetical LOC346547               | 0.068  | 1.049 | 7.34E-01 | 7.34E+01 |  |  |
| 8144047 | NM_007349                | PAXIP1      | PAX interacting (with transcription  | -0.027 | 0.981 | 8.70E-01 | 8.70E+01 |  |  |
| 8144078 | NM_000193                | SHH         | sonic hedgehog homolog (Drosophi     | -0.047 | 0.968 | 7.25E-01 | 7.25E+01 |  |  |
| 8144082 | NR_026865                | C7orf13     | chromosome 7 open reading fram       | -0.014 | 0.990 | 9.56E-01 | 9.56E+01 |  |  |
| 8144089 | NM_022458                | LMBR1       | limb region 1 homolog (mouse)        | -0.032 | 0.978 | 8.63E-01 | 8.63E+01 |  |  |
| 8144112 | NM_005515                | MNX1        | motor neuron and pancreas home       | 0.055  | 1.039 | 6.19E-01 | 6.19E+01 |  |  |
| 8144119 | ---                      | ---         | ---                                  | -0.054 | 0.963 | 6.76E-01 | 6.76E+01 |  |  |
| 8144121 | NM_002847                | PTPRN2      | protein tyrosine phosphatase, rec    | -0.035 | 0.976 | 8.20E-01 | 8.20E+01 |  |  |
| 8144184 | NM_020728                | ESYT2       | extended synaptotagmin-like prot     | 0.028  | 1.020 | 8.10E-01 | 8.10E+01 |  |  |
| 8144239 | NM_183421                | FBXO25      | F-box protein 25                     | -0.056 | 0.962 | 6.24E-01 | 6.24E+01 |  |  |
| 8144253 | NM_004745                | DLGAP2      | discs, large (Drosophila) homolog    | -0.054 | 0.963 | 6.23E-01 | 6.23E+01 |  |  |
| 8144267 | NM_018941                | CLN8        | ceroid-lipofuscinosis, neuronal 8 (  | 0.132  | 1.096 | 2.85E-02 | 2.85E+00 |  |  |
| 8144279 | NM_018941                | CLN8        | ceroid-lipofuscinosis, neuronal 8 (  | 0.139  | 1.101 | 1.51E-01 | 1.51E+01 |  |  |
| 8144315 | BC026965                 | ARHGEF10    | Rho guanine nucleotide exchange      | -0.023 | 0.984 | 9.49E-01 | 9.49E+01 |  |  |
| 8144317 | NM_014867                | KBTBD11     | kelch repeat and BTB (POZ) domain    | -0.093 | 0.937 | 3.41E-01 | 3.41E+01 |  |  |
| 8144361 | NM_024596                | MCPH1       | microcephalin 1                      | 0.027  | 1.019 | 8.74E-01 | 8.74E+01 |  |  |
| 8144378 | NM_018361                | AGPAT5      | 1-acylglycerol-3-phosphate O-acyl    | 0.241  | 1.182 | 1.29E-02 | 1.29E+00 |  |  |
| 8144388 | NM_018088                | FAM90A1     | family with sequence similarity 90   | -0.053 | 0.964 | 6.24E-01 | 6.24E+01 |  |  |
| 8144392 | NR_003668                | DEFB109P1B  | defensin, beta 109, pseudogene 1     | 0.119  | 1.086 | 8.08E-01 | 8.08E+01 |  |  |
| 8144395 | NM_201402 //P17L2 //USP1 |             | ubiquitin specific peptidase 17-like | -0.029 | 0.980 | 8.64E-01 | 8.64E+01 |  |  |
| 8144397 | NM_201402                | USP17L2     | ubiquitin specific peptidase 17-like | 0.011  | 1.007 | 9.60E-01 | 9.60E+01 |  |  |
| 8144410 | NR_027000                | LOC349196   | hypothetical LOC349196               | -0.061 | 0.959 | 7.35E-01 | 7.35E+01 |  |  |
| 8144412 | NR_027000                | LOC349196   | hypothetical LOC349196               | -0.045 | 0.969 | 8.26E-01 | 8.26E+01 |  |  |
| 8144414 | NR_027000                | LOC349196   | hypothetical LOC349196               | -0.045 | 0.969 | 8.26E-01 | 8.26E+01 |  |  |
| 8144416 | NR_027000                | LOC349196   | hypothetical LOC349196               | -0.081 | 0.945 | 6.16E-01 | 6.16E+01 |  |  |
| 8144418 | NR_027000                | LOC349196   | hypothetical LOC349196               | -0.081 | 0.945 | 6.16E-01 | 6.16E+01 |  |  |
| 8144420 | NR_027000                | LOC349196   | hypothetical LOC349196               | -0.065 | 0.956 | 7.11E-01 | 7.11E+01 |  |  |
| 8144422 | NM_00104007              | LOC650293   | seven transmembrane helix recep      | -0.032 | 0.978 | 7.78E-01 | 7.78E+01 |  |  |
| 8144424 | NM_018088                | FAM90A1     | family with sequence similarity 90   | -0.060 | 0.959 | 5.81E-01 | 5.81E+01 |  |  |
| 8144428 | NM_018088                | FAM90A1     | family with sequence similarity 90   | -0.050 | 0.966 | 6.52E-01 | 6.52E+01 |  |  |
| 8144432 | NM_018088                | FAM90A1     | family with sequence similarity 90   | -0.050 | 0.966 | 6.52E-01 | 6.52E+01 |  |  |
| 8144436 | NM_018088                | FAM90A1     | family with sequence similarity 90   | -0.050 | 0.966 | 6.52E-01 | 6.52E+01 |  |  |
| 8144440 | NM_018088                | FAM90A1     | family with sequence similarity 90   | -0.060 | 0.959 | 5.81E-01 | 5.81E+01 |  |  |
| 8144444 | NM_018088                | FAM90A1     | family with sequence similarity 90   | -0.050 | 0.966 | 6.52E-01 | 6.52E+01 |  |  |
| 8144448 | NM_018088                | FAM90A1     | family with sequence similarity 90   | -0.041 | 0.972 | 7.49E-01 | 7.49E+01 |  |  |
| 8144488 | NR_027000                | LOC349196   | hypothetical LOC349196               | -0.059 | 0.960 | 8.59E-01 | 8.59E+01 |  |  |
| 8144490 | NR_027000                | LOC349196   | hypothetical LOC349196               | -0.081 | 0.945 | 6.16E-01 | 6.16E+01 |  |  |
| 8144492 | NR_027000                | LOC349196   | hypothetical LOC349196               | -0.081 | 0.945 | 6.16E-01 | 6.16E+01 |  |  |
| 8144494 | NR_027000                | LOC349196   | hypothetical LOC349196               | -0.065 | 0.956 | 7.11E-01 | 7.11E+01 |  |  |
| 8144496 | NM_00104007              | LOC650293   | seven transmembrane helix recep      | -0.032 | 0.978 | 8.07E-01 | 8.07E+01 |  |  |
| 8144498 | AK304567                 | hCG_1990547 | family with sequence similarity 86   | 0.038  | 1.027 | 9.00E-01 | 9.00E+01 |  |  |
| 8144505 | NM_194284                | CLDN23      | claudin 23                           | 0.003  | 1.002 | 9.87E-01 | 9.87E+01 |  |  |
| 8144516 | NM_153332                | ERI1        | exoribonuclease 1                    | 0.091  | 1.065 | 5.29E-01 | 5.29E+01 |  |  |
| 8144528 | NM_003747                | TNKS        | tankyrase, TRF1-interacting ankyri   | -0.052 | 0.964 | 7.58E-01 | 7.58E+01 |  |  |
| 8144557 | NM_012331                | MSRA        | methionine sulfoxide reductase A     | 0.146  | 1.107 | 3.20E-01 | 3.20E+01 |  |  |
| 8144577 | NM_00104003              | C8orf74     | chromosome 8 open reading fram       | -0.079 | 0.947 | 4.94E-01 | 4.94E+01 |  |  |
| 8144584 | ---                      | ---         | ---                                  | 0.012  | 1.008 | 9.75E-01 | 9.75E+01 |  |  |
| 8144586 | NM_015458                | MTMR9       | myotubularin related protein 9       | -0.028 | 0.981 | 8.44E-01 | 8.44E+01 |  |  |
| 8144600 | NM_054028                | AMAC1L2     | acyl-malonyl condensing enzyme 2     | -0.200 | 0.870 | 4.57E-01 | 4.57E+01 |  |  |
| 8144619 | ---                      | ---         | ---                                  | -0.010 | 0.993 | 9.56E-01 | 9.56E+01 |  |  |
| 8144625 | NM_001715                | BLK         | B lymphoid tyrosine kinase           | 0.004  | 1.003 | 9.87E-01 | 9.87E+01 |  |  |
| 8144643 | NM_002052                | GATA4       | GATA binding protein 4               | -0.021 | 0.986 | 8.90E-01 | 8.90E+01 |  |  |
| 8144658 | NM_145043                | NEIL2       | nei like 2 (E. coli)                 | -0.037 | 0.975 | 7.45E-01 | 7.45E+01 |  |  |
| 8144667 | ---                      | ---         | ---                                  | 0.007  | 1.005 | 9.80E-01 | 9.80E+01 |  |  |
| 8144669 | NM_004462                | FDFT1       | farnesyl-diphosphate farnesyltran    | -0.027 | 0.981 | 8.88E-01 | 8.88E+01 |  |  |
| 8144685 | ---                      | ---         | ---                                  | 0.093  | 1.067 | 4.12E-01 | 4.12E+01 |  |  |
| 8144699 | ---                      | ---         | ---                                  | -0.006 | 0.996 | 9.92E-01 | 9.92E+01 |  |  |
| 8144703 | ---                      | ---         | ---                                  | -0.076 | 0.949 | 2.46E-01 | 2.46E+01 |  |  |
| 8144717 | ---                      | ---         | ---                                  | 0.145  | 1.105 | 3.74E-01 | 3.74E+01 |  |  |
| 8144758 | NM_016353                | ZDHC2       | zinc finger, DHHC-type containing    | -0.080 | 0.946 | 5.29E-01 | 5.29E+01 |  |  |
| 8144774 | NM_152415                | VPS37A      | vacuolar protein sorting 37 homol    | 0.004  | 1.003 | 9.85E-01 | 9.85E+01 |  |  |
| 8144810 | ---                      | ---         | ---                                  | -0.029 | 0.980 | 8.66E-01 | 8.66E+01 |  |  |
| 8144812 | NM_006197                | PCM1        | pericentriolar material 1            | -0.013 | 0.991 | 9.43E-01 | 9.43E+01 |  |  |
| 8144874 | AY176665                 | NSAP11      | nervous system abundant protein      | -0.083 | 0.944 | 5.95E-01 | 5.95E+01 |  |  |
| 8144880 | NM_022071                | SH2D4A      | SH2 domain containing 4A             | -0.009 | 0.994 | 9.64E-01 | 9.64E+01 |  |  |
| 8144894 | NM_018142                | INTS10      | integrator complex subunit 10        | -0.029 | 0.980 | 8.64E-01 | 8.64E+01 |  |  |
| 8144931 | NM_001693                | ATP6V1B2    | ATPase, H+ transporting, lysosomal   | 0.142  | 1.103 | 7.05E-01 | 7.05E+01 |  |  |
| 8144949 | ---                      | ---         | ---                                  | -0.089 | 0.940 | 4.43E-01 | 4.43E+01 |  |  |
| 8144951 | ---                      | ---         | ---                                  | 0.012  | 1.008 | 9.53E-01 | 9.53E+01 |  |  |
| 8144953 | NM_00110016              | XPO7        | exportin 7                           | 0.093  | 1.067 | 3.75E-01 | 3.75E+01 |  |  |
| 8144982 | NM_182795                | NPM2        | nucleophosmin/nucleoplasmin 2        | -0.011 | 0.992 | 9.63E-01 | 9.63E+01 |  |  |
| 8144995 | NM_003867                | FGF17       | fibroblast growth factor 17          | -0.032 | 0.978 | 8.16E-01 | 8.16E+01 |  |  |
| 8145027 | NM_022749                | FAM160B2    | family with sequence similarity 16   | 0.010  | 1.007 | 9.53E-01 | 9.53E+01 |  |  |

|         |              |              |                                      |        |       |          |          |  |
|---------|--------------|--------------|--------------------------------------|--------|-------|----------|----------|--|
| 8145047 | NM_003018    | SFTPC        | surfactant protein C                 | -0.001 | 0.999 | 9.94E-01 | 9.94E+01 |  |
| 8145055 | NM_006129    | BMP1         | bone morphogenetic protein 1         | -0.022 | 0.985 | 8.78E-01 | 8.78E+01 |  |
| 8145085 | NM_001722    | POLR3D       | polymerase (RNA) III (DNA direct     | -0.012 | 0.991 | 9.54E-01 | 9.54E+01 |  |
| 8145134 | ---          | ---          | ---                                  | 0.014  | 1.010 | 9.57E-01 | 9.57E+01 |  |
| 8145136 | NM_005605    | PPP3CC       | protein phosphatase 3 (formerly 2    | -0.099 | 0.933 | 3.33E-01 | 3.33E+01 |  |
| 8145151 | NM_005775    | SORBS3       | sorbin and SH3 domain containing     | 0.124  | 1.090 | 1.85E-01 | 1.85E+01 |  |
| 8145175 | NM_176871    | PDLIM2       | PDZ and LIM domain 2 (mystique)      | -0.063 | 0.958 | 3.75E-01 | 3.75E+01 |  |
| 8145193 | NM_00101384  | C8orf58      | chromosome 8 open reading fram       | -0.013 | 0.991 | 9.23E-01 | 9.23E+01 |  |
| 8145201 | NM_021174    | KIAA1967     | KIAA1967                             | -0.080 | 0.946 | 3.62E-01 | 3.62E+01 |  |
| 8145225 | ---          | ---          | ---                                  | -0.023 | 0.984 | 9.66E-01 | 9.66E+01 |  |
| 8145227 | NM_00116003  | RHOBTB2      | Rho-related BTB domain containin     | -0.031 | 0.979 | 8.01E-01 | 8.01E+01 |  |
| 8145259 | NM_152272    | CHMP7        | CHMP family, member 7                | 0.104  | 1.075 | 5.70E-01 | 5.70E+01 |  |
| 8145272 | NM_00113610  | R3HCC1       | R3H domain and coiled-coil containi  | -0.070 | 0.952 | 5.44E-01 | 5.44E+01 |  |
| 8145361 | NM_005382    | NEFM         | neurofilament, medium polypeptid     | -0.168 | 0.890 | 2.73E-01 | 2.73E+01 |  |
| 8145365 | NM_024940    | DOCK5        | dedicator of cytokinesis 5           | 0.151  | 1.110 | 7.14E-01 | 7.14E+01 |  |
| 8145440 | NM_002717    | PPP2R2A      | protein phosphatase 2 (formerly 2    | 0.048  | 1.034 | 6.58E-01 | 6.58E+01 |  |
| 8145454 | NM_004331    | BNIP3L       | BCL2/adenovirus E1B 19kDa intera     | 0.011  | 1.008 | 9.67E-01 | 9.67E+01 |  |
| 8145490 | NM_173174    | PTK2B        | PTK2B protein tyrosine kinase 2 be   | 0.033  | 1.023 | 8.79E-01 | 8.79E+01 |  |
| 8145529 | ---          | ---          | ---                                  | 0.086  | 1.061 | 7.85E-01 | 7.85E+01 |  |
| 8145555 | NM_016240    | SCARA3       | scavenger receptor class A, memb     | -0.056 | 0.962 | 6.80E-01 | 6.80E+01 |  |
| 8145568 | ---          | ---          | ---                                  | -0.011 | 0.992 | 9.65E-01 | 9.65E+01 |  |
| 8145586 | NM_018091    | ELP3         | elongation protein 3 homolog (S. c   | 0.137  | 1.100 | 2.48E-02 | 2.48E+00 |  |
| 8145603 | NM_006228    | PNOC         | prepronociceptin                     | 0.019  | 1.013 | 9.16E-01 | 9.16E+01 |  |
| 8145622 | ---          | ---          | ---                                  | 0.061  | 1.043 | 7.42E-01 | 7.42E+01 |  |
| 8145624 | NM_001440    | EXTL3        | exostoses (multiple)-like 3          | -0.090 | 0.940 | 3.43E-01 | 3.43E+01 |  |
| 8145636 | NM_024567    | HMBOX1       | homeobox containing 1                | -0.106 | 0.929 | 4.97E-01 | 4.97E+01 |  |
| 8145652 | NM_015344    | LEPROTL1     | leptin receptor overlapping transc   | -0.012 | 0.992 | 9.63E-01 | 9.63E+01 |  |
| 8145660 | NM_006571    | DCTN6        | dynactin 6                           | -0.122 | 0.919 | 1.78E-01 | 1.78E+01 |  |
| 8145669 | NM_00100871  | RBPMS        | RNA binding protein with multiple    | -0.086 | 0.942 | 5.39E-01 | 5.39E+01 |  |
| 8145702 | NM_000553    | WRN          | Werner syndrome, RecQ helicase-      | 0.024  | 1.017 | 9.16E-01 | 9.16E+01 |  |
| 8145782 | NM_032509    | MAK16        | MAK16 homolog (S. cerevisiae)        | 0.035  | 1.025 | 9.04E-01 | 9.04E+01 |  |
| 8145793 | NR_003041    | SNORD13      | small nucleolar RNA, C/D box 13      | 0.235  | 1.177 | 5.54E-01 | 5.54E+01 |  |
| 8145795 | XM_002346094 | LOC100293539 | similar to ribosomal protein 10      | 0.061  | 1.043 | 7.60E-01 | 7.60E+01 |  |
| 8145799 | NM_080872    | UNC5D        | unc-5 homolog D (C. elegans)         | -0.055 | 0.962 | 5.30E-01 | 5.30E+01 |  |
| 8145829 | NM_025069    | ZNF703       | zinc finger protein 703              | 0.036  | 1.026 | 7.03E-01 | 7.03E+01 |  |
| 8145854 | NM_007198    | PROSC        | proline synthetase co-transcribed    | 0.071  | 1.051 | 4.31E-01 | 4.31E+01 |  |
| 8145865 | NM_032777    | GPR124       | G protein-coupled receptor 124       | -0.023 | 0.984 | 8.43E-01 | 8.43E+01 |  |
| 8145887 | ---          | ---          | ---                                  | -0.026 | 0.982 | 9.19E-01 | 9.19E+01 |  |
| 8145889 | NM_004095    | EIF4EBP1     | eukaryotic translation initiation fa | -0.048 | 0.967 | 6.58E-01 | 6.58E+01 |  |
| 8145894 | NM_004674    | ASH2L        | ash2 (absent, small, or homeotic)-   | 0.008  | 1.006 | 9.68E-01 | 9.68E+01 |  |
| 8145914 | NM_004874    | BAG4         | BCL2-associated athanogene 4         | 0.000  | 1.000 | 1.00E+00 | 1.00E+02 |  |
| 8145922 | NM_015214    | DDHD2        | DDHD domain containing 2             | -0.116 | 0.923 | 3.42E-01 | 3.42E+01 |  |
| 8145942 | NM_144652    | LETM2        | leucine zipper-EF-hand containing    | -0.175 | 0.886 | 1.40E-01 | 1.40E+01 |  |
| 8145954 | NM_006283    | TACC1        | transforming, acidic coiled-coil coi | -0.030 | 0.980 | 8.26E-01 | 8.26E+01 |  |
| 8145977 | NM_021623    | PLEKHA2      | pleckstrin homology domain conta     | 0.035  | 1.025 | 8.98E-01 | 8.98E+01 |  |
| 8145989 | NM_153692    | HTRA4        | Htra serine peptidase 4              | 0.236  | 1.178 | 8.56E-02 | 8.56E+00 |  |
| 8146000 | NM_003816    | ADAM9        | ADAM metallopeptidase domain 9       | 0.312  | 1.242 | 4.81E-01 | 4.81E+01 |  |
| 8146118 | ---          | ---          | ---                                  | 0.002  | 1.001 | 9.96E-01 | 9.96E+01 |  |
| 8146122 | NM_016099    | GOLGA7       | golgi autoantigen, golgin subfamili  | 0.004  | 1.003 | 9.84E-01 | 9.84E+01 |  |
| 8146142 | NM_178819    | AGPAT6       | 1-acylglycerol-3-phosphate O-acyl    | -0.210 | 0.865 | 2.60E-02 | 2.60E+00 |  |
| 8146159 | NM_00113429  | AP3M2        | adaptor-related protein complex 3    | -0.173 | 0.887 | 2.57E-01 | 2.57E+01 |  |
| 8146171 | NM_001556    | IKKB         | inhibitor of kappa light polypeptid  | 0.036  | 1.025 | 7.65E-01 | 7.65E+01 |  |
| 8146198 | NM_002690    | POLB         | polymrase (DNA directed), beta       | 0.249  | 1.188 | 4.71E-02 | 4.71E+00 |  |
| 8146216 | NM_00113569  | VDAC3        | voltage-dependent anion channel      | -0.013 | 0.991 | 9.53E-01 | 9.53E+01 |  |
| 8146225 | NM_00113567  | C8orf40      | chromosome 8 open reading fram       | -0.045 | 0.969 | 8.24E-01 | 8.24E+01 |  |
| 8146239 | ---          | ---          | ---                                  | 0.009  | 1.007 | 9.75E-01 | 9.75E+01 |  |
| 8146243 | NM_032410    | HOOK3        | hook homolog 3 (Drosophila)          | 0.014  | 1.010 | 9.53E-01 | 9.53E+01 |  |
| 8146268 | NM_002027    | FNTA         | farnesyltransferase, CAAX box, alp   | 0.036  | 1.025 | 8.06E-01 | 8.06E+01 |  |
| 8146278 | NM_032237    | SGK196       | protein kinase-like protein Sgk196   | -0.051 | 0.965 | 6.75E-01 | 6.75E+01 |  |
| 8146285 | NM_152419    | HGSNAT       | heparan-alpha-glucosaminide N-a      | -0.084 | 0.944 | 6.11E-01 | 6.11E+01 |  |
| 8146305 | ---          | ---          | ---                                  | -0.025 | 0.983 | 9.61E-01 | 9.61E+01 |  |
| 8146328 | ---          | ---          | ---                                  | 0.006  | 1.004 | 9.85E-01 | 9.85E+01 |  |
| 8146334 | ---          | ---          | ---                                  | 0.049  | 1.034 | 7.36E-01 | 7.36E+01 |  |
| 8146336 | AK301677     | KIAA0146     | KIAA0146                             | 0.096  | 1.069 | 6.00E-01 | 6.00E+01 |  |
| 8146357 | NM_005914    | MCM4         | minichromosome maintenance co        | 0.095  | 1.068 | 6.90E-01 | 6.90E+01 |  |
| 8146379 | NM_003350    | UBE2V2       | ubiquitin-conjugating enzyme E2 v    | -0.009 | 0.994 | 9.62E-01 | 9.62E+01 |  |
| 8146388 | AK128232     | FLJ46365     | hypothetical LOC401459               | -0.029 | 0.980 | 8.74E-01 | 8.74E+01 |  |
| 8146425 | ---          | ---          | ---                                  | 0.140  | 1.102 | 4.41E-01 | 4.41E+01 |  |
| 8146427 | NM_052937    | PCMTD1       | protein-L-isoaspartate (D-aspartat   | -0.005 | 0.997 | 9.82E-01 | 9.82E+01 |  |
| 8146429 | NM_005285    | NPBWR1       | neuropeptides B/W receptor 1         | -0.062 | 0.958 | 7.03E-01 | 7.03E+01 |  |
| 8146435 | NM_170587    | RGS20        | regulator of G-protein signaling 20  | -0.041 | 0.972 | 8.04E-01 | 8.04E+01 |  |
| 8146448 | NM_014175    | MRPL15       | mitochondrial ribosomal protein L    | 0.136  | 1.099 | 5.24E-01 | 5.24E+01 |  |
| 8146456 | NR_004385    | RNU105C      | RNA, U105C small nucleolar           | -0.154 | 0.898 | 4.53E-01 | 4.53E+01 |  |
| 8146462 | NM_022454    | SOX17        | SRY (sex determining region Y)-bo    | -0.026 | 0.982 | 8.81E-01 | 8.81E+01 |  |
| 8146475 | NM_052898    | XKR4         | XK, Kell blood group complex subu    | -0.040 | 0.973 | 6.29E-01 | 6.29E+01 |  |
| 8146480 | BC043417     | TMEM68       | transmembrane protein 68             | 0.048  | 1.034 | 8.80E-01 | 8.80E+01 |  |
| 8146482 | NM_024831    | TGS1         | trimethylguanosine synthase hom      | -0.037 | 0.975 | 7.63E-01 | 7.63E+01 |  |

|         |             |         |                                       |        |       |          |          |  |  |
|---------|-------------|---------|---------------------------------------|--------|-------|----------|----------|--|--|
| 8146500 | NM_002350   | LYN     | v-yes-1 Yamaguchi sarcoma viral r     | 0.155  | 1.113 | 6.77E-01 | 6.77E+01 |  |  |
| 8146517 | NM_00101166 | CHCHD7  | coiled-coil-helix-coiled-coil-helix d | 0.105  | 1.075 | 2.39E-01 | 2.39E+01 |  |  |
| 8146544 | NM_00107761 | UBXN2B  | UBX domain protein 2B                 | 0.017  | 1.012 | 9.65E-01 | 9.65E+01 |  |  |
| 8146550 | NM_005625   | SDCBP   | syndecan binding protein (synteni     | 0.316  | 1.245 | 2.65E-01 | 2.65E+01 |  |  |
| 8146559 | ---         | ---     | ---                                   | 0.054  | 1.038 | 6.31E-01 | 6.31E+01 |  |  |
| 8146564 | NM_002865   | RAB2A   | RAB2A, member RAS oncogene fa         | 0.095  | 1.068 | 3.41E-01 | 3.41E+01 |  |  |
| 8146579 | NM_017780   | CHD7    | chromodomain helicase DNA bind        | -0.004 | 0.997 | 9.88E-01 | 9.88E+01 |  |  |
| 8146637 | NM_152758   | YTHDF3  | YTH domain family, member 3           | 0.044  | 1.031 | 7.27E-01 | 7.27E+01 |  |  |
| 8146645 | NM_152414   | BHLHE22 | basic helix-loop-helix family, mem    | -0.017 | 0.988 | 8.88E-01 | 8.88E+01 |  |  |
| 8146647 | ---         | ---     | ---                                   | 0.149  | 1.109 | 6.33E-01 | 6.33E+01 |  |  |
| 8146649 | NM_014637   | MTFR1   | mitochondrial fission regulator 1     | 0.024  | 1.017 | 9.51E-01 | 9.51E+01 |  |  |
| 8146669 | NM_033058   | TRIM55  | tripartite motif-containing 55        | 0.001  | 1.001 | 9.95E-01 | 9.95E+01 |  |  |
| 8146685 | NM_015169   | RRS1    | RRS1 ribosome biogenesis regulat      | 0.022  | 1.015 | 9.26E-01 | 9.26E+01 |  |  |
| 8146717 | NM_013257   | SGK3    | serum/glucocorticoid regulated ki     | 0.139  | 1.101 | 6.33E-01 | 6.33E+01 |  |  |
| 8146756 | NM_00107720 | CSPP1   | centrosome and spindle pole asso      | -0.041 | 0.972 | 8.33E-01 | 8.33E+01 |  |  |
| 8146892 | ---         | ---     | ---                                   | -0.022 | 0.985 | 9.53E-01 | 9.53E+01 |  |  |
| 8146898 | ---         | ---     | ---                                   | 0.297  | 1.229 | 5.45E-02 | 5.45E+00 |  |  |
| 8146908 | NM_004770   | KCNB2   | potassium voltage-gated channel,      | -0.026 | 0.982 | 8.31E-01 | 8.31E+01 |  |  |
| 8146914 | NM_017489   | TERF1   | telomeric repeat binding factor (N    | -0.104 | 0.931 | 3.22E-01 | 3.22E+01 |  |  |
| 8146921 | NM_172037   | RDH10   | retinol dehydrogenase 10 (all-tran    | 0.061  | 1.043 | 8.24E-01 | 8.24E+01 |  |  |
| 8146930 | NM_017866   | TMEM70  | transmembrane protein 70              | 0.256  | 1.194 | 5.14E-04 | 5.14E-02 |  |  |
| 8146941 | ---         | ---     | ---                                   | 0.103  | 1.074 | 6.35E-01 | 6.35E+01 |  |  |
| 8146945 | NM_018972   | GDPAP1  | ganglioside-induced differentiatio    | 0.235  | 1.177 | 8.43E-02 | 8.43E+00 |  |  |
| 8146955 | ---         | ---     | ---                                   | -0.065 | 0.956 | 7.16E-01 | 7.16E+01 |  |  |
| 8147040 | NM_00110553 | ZBTB10  | zinc finger and BTB domain contai     | -0.075 | 0.949 | 5.35E-01 | 5.35E+01 |  |  |
| 8147049 | NM_001444   | FABP5   | fatty acid binding protein 5 (psoria  | 0.271  | 1.207 | 5.45E-02 | 5.45E+00 |  |  |
| 8147057 | NM_152284   | CHMP4C  | chromatin modifying protein 4C        | 0.019  | 1.013 | 8.95E-01 | 8.95E+01 |  |  |
| 8147101 | NM_001951   | E2F5    | E2F transcription factor 5, p130-bi   | 0.284  | 1.218 | 6.90E-02 | 6.90E+00 |  |  |
| 8147112 | NM_198584   | CA13    | carbonic anhydrase XIII               | 0.032  | 1.022 | 9.18E-01 | 9.18E+01 |  |  |
| 8147123 | NM_005181   | CA3     | carbonic anhydrase III, muscle spe    | -0.076 | 0.948 | 5.24E-01 | 5.24E+01 |  |  |
| 8147156 | NM_007013   | WWP1    | WW domain containing E3 ubiquit       | 0.070  | 1.050 | 6.60E-01 | 6.60E+01 |  |  |
| 8147172 | NM_003909   | CPNE3   | copine III                            | -0.005 | 0.996 | 9.83E-01 | 9.83E+01 |  |  |
| 8147206 | NM_003821   | RIPK2   | receptor-interacting serine-threon    | -0.203 | 0.869 | 4.14E-01 | 4.14E+01 |  |  |
| 8147221 | NM_004337   | OSGIN2  | oxidative stress induced growth in    | -0.258 | 0.836 | 4.98E-02 | 4.98E+00 |  |  |
| 8147228 | NM_001359   | DECR1   | 2,4-dienoyl CoA reductase 1, mito     | 0.287  | 1.220 | 7.24E-04 | 7.24E-02 |  |  |
| 8147262 | NM_016023   | OTUD6B  | OTU domain containing 6B              | 0.069  | 1.049 | 6.66E-01 | 6.66E+01 |  |  |
| 8147303 | ---         | ---     | ---                                   | 0.028  | 1.020 | 8.75E-01 | 8.75E+01 |  |  |
| 8147307 | NM_145269   | FAM92A1 | family with sequence similarity 92    | 0.087  | 1.062 | 5.34E-01 | 5.34E+01 |  |  |
| 8147344 | NM_00116177 | PDP1    | pyruvate dehydrogenase phosphata      | 0.209  | 1.156 | 1.16E-02 | 1.16E+00 |  |  |
| 8147371 | ---         | ---     | ---                                   | -0.043 | 0.970 | 7.48E-01 | 7.48E+01 |  |  |
| 8147396 | NM_017864   | INTS8   | integrator complex subunit 8          | -0.076 | 0.949 | 6.48E-01 | 6.48E+01 |  |  |
| 8147439 | NM_024613   | PLEKHF2 | pleckstrin homology domain conta      | 0.233  | 1.175 | 1.12E-02 | 1.12E+00 |  |  |
| 8147447 | NM_014754   | PTDSS1  | phosphatidylserine synthase 1         | 0.102  | 1.073 | 3.91E-01 | 3.91E+01 |  |  |
| 8147461 | NM_002998   | SDC2    | syndecan 2                            | 0.422  | 1.340 | 3.22E-01 | 3.22E+01 |  |  |
| 8147469 | NM_016134   | PGCP    | plasma glutamate carboxypeptida       | 0.418  | 1.336 | 7.50E-02 | 7.50E+00 |  |  |
| 8147479 | ---         | ---     | ---                                   | 0.043  | 1.030 | 7.86E-01 | 7.86E+01 |  |  |
| 8147481 | ---         | ---     | ---                                   | 0.013  | 1.009 | 9.16E-01 | 9.16E+01 |  |  |
| 8147483 | NM_178812   | MTDH    | metadherin                            | 0.063  | 1.044 | 3.50E-01 | 3.50E+01 |  |  |
| 8147516 | NM_002380   | MATN2   | matrilin 2                            | 0.036  | 1.026 | 7.68E-01 | 7.68E+01 |  |  |
| 8147543 | BC062359    | C8orf47 | chromosome 8 open reading fram        | -0.016 | 0.989 | 9.16E-01 | 9.16E+01 |  |  |
| 8147548 | NM_00114586 | POP1    | processing of precursor 1, ribonuc    | 0.113  | 1.082 | 3.28E-01 | 3.28E+01 |  |  |
| 8147566 | NM_020697   | KCNS2   | potassium voltage-gated channel,      | 0.052  | 1.037 | 5.69E-01 | 5.69E+01 |  |  |
| 8147573 | NM_00114246 | OSR2    | odd-skipped related 2 (Drosophila     | 0.015  | 1.010 | 9.27E-01 | 9.27E+01 |  |  |
| 8147580 | NM_017890   | VPS13B  | vacuolar protein sorting 13 homol     | 0.019  | 1.013 | 9.00E-01 | 9.00E+01 |  |  |
| 8147654 | NM_005034   | POLR2K  | polymerase (RNA) II (DNA directed     | -0.048 | 0.967 | 7.85E-01 | 7.85E+01 |  |  |
| 8147693 | NR_002182   | NACAP1  | nascent-polypeptide-associated co     | -0.017 | 0.988 | 9.07E-01 | 9.07E+01 |  |  |
| 8147756 | NM_024812   | BAALC   | brain and acute leukemia, cytopla     | -0.293 | 0.816 | 1.50E-02 | 1.50E+00 |  |  |
| 8147777 | NM_138455   | CTHRC1  | collagen triple helix repeat contain  | -0.001 | 1.000 | 9.99E-01 | 9.99E+01 |  |  |
| 8147785 | NM_015420   | DCAF13  | DBF1 and CUL4 associated factor       | 0.026  | 1.018 | 8.59E-01 | 8.59E+01 |  |  |
| 8147848 | NM_181354   | OXR1    | oxidation resistance 1                | 0.258  | 1.196 | 3.68E-03 | 3.68E-01 |  |  |
| 8147864 | NM_014673   | TTC35   | tetratricopeptide repeat domain 3     | 0.106  | 1.076 | 3.28E-01 | 3.28E+01 |  |  |
| 8147883 | NM_020189   | ENY2    | enhancer of yellow 2 homolog (Dr      | 0.011  | 1.008 | 9.56E-01 | 9.56E+01 |  |  |
| 8147970 | NM_198120   | EBAG9   | estrogen receptor binding site ass    | 0.051  | 1.036 | 7.45E-01 | 7.45E+01 |  |  |
| 8147988 | ---         | ---     | ---                                   | 0.131  | 1.095 | 7.59E-01 | 7.59E+01 |  |  |
| 8147990 | ---         | ---     | ---                                   | 0.215  | 1.160 | 3.18E-01 | 3.18E+01 |  |  |
| 8147994 | NM_032334   | UTP23   | UTP23, small subunit (SSU) proces     | 0.104  | 1.075 | 5.50E-01 | 5.50E+01 |  |  |
| 8148018 | ---         | ---     | ---                                   | 0.024  | 1.017 | 9.17E-01 | 9.17E+01 |  |  |
| 8148020 | ---         | ---     | ---                                   | -0.053 | 0.964 | 8.24E-01 | 8.24E+01 |  |  |
| 8148022 | NM_080651   | MED30   | mediator complex subunit 30           | -0.173 | 0.887 | 3.45E-02 | 3.45E+00 |  |  |
| 8148049 | NM_002514   | NOV     | nephroblastoma overexpressed ge       | -0.028 | 0.981 | 8.43E-01 | 8.43E+01 |  |  |
| 8148057 | ---         | ---     | ---                                   | -0.045 | 0.969 | 8.49E-01 | 8.49E+01 |  |  |
| 8148149 | NM_014943   | ZHX2    | zinc fingers and homeoboxes 2         | -0.080 | 0.946 | 5.76E-01 | 5.76E+01 |  |  |
| 8148158 | NM_145647   | WDR67   | WD repeat domain 67                   | 0.154  | 1.113 | 2.37E-01 | 2.37E+01 |  |  |
| 8148184 | NM_032899   | FAM83A  | family with sequence similarity 83    | 0.072  | 1.051 | 3.95E-01 | 3.95E+01 |  |  |
| 8148196 | ---         | ---     | ---                                   | -0.094 | 0.937 | 7.29E-01 | 7.29E+01 |  |  |
| 8148208 | NM_144963   | FAM91A1 | family with sequence similarity 91    | 0.162  | 1.118 | 3.38E-01 | 3.38E+01 |  |  |
| 8148261 | ---         | ---     | ---                                   | 0.013  | 1.009 | 9.51E-01 | 9.51E+01 |  |  |



|         |             |           |                                     |        |       |          |          |  |  |
|---------|-------------|-----------|-------------------------------------|--------|-------|----------|----------|--|--|
| 8148263 | NM_017956   | TRMT12    | tRNA methyltransferase 12 homol     | -0.079 | 0.947 | 7.15E-01 | 7.15E+01 |  |  |
| 8148265 | NM_007218   | RNF139    | ring finger protein 139             | 0.013  | 1.009 | 9.52E-01 | 9.52E+01 |  |  |
| 8148270 | NM_005005   | NDUFB9    | NADH dehydrogenase (ubiquinone      | 0.008  | 1.006 | 9.73E-01 | 9.73E+01 |  |  |
| 8148280 | NM_003129   | SQLE      | squalene epoxidase                  | -0.230 | 0.853 | 2.21E-01 | 2.21E+01 |  |  |
| 8148293 | NM_173685   | NSMCE2    | non-SMC element 2, MMS21 hom        | -0.024 | 0.983 | 9.35E-01 | 9.35E+01 |  |  |
| 8148302 | ---         | ---       | ---                                 | 0.180  | 1.133 | 4.01E-01 | 4.01E+01 |  |  |
| 8148304 | NM_025195   | TRIB1     | tribbles homolog 1 (Drosophila)     | -0.008 | 0.994 | 9.85E-01 | 9.85E+01 |  |  |
| 8148309 | ---         | ---       | ---                                 | 0.327  | 1.254 | 1.94E-01 | 1.94E+01 |  |  |
| 8148315 | NM_00115954 | POU5F1B   | POU class 5 homeobox 1B             | 0.091  | 1.065 | 5.91E-01 | 5.91E+01 |  |  |
| 8148317 | NM_002467   | MYC       | v-myc myelocytomatosis viral onc    | -0.031 | 0.979 | 9.20E-01 | 9.20E+01 |  |  |
| 8148325 | ---         | ---       | ---                                 | 0.032  | 1.022 | 9.39E-01 | 9.39E+01 |  |  |
| 8148329 | ---         | ---       | ---                                 | -0.082 | 0.945 | 2.78E-01 | 2.78E+01 |  |  |
| 8148333 | NM_015137   | EFR3A     | EFR3 homolog A (S. cerevisiae)      | 0.201  | 1.150 | 5.64E-02 | 5.64E+00 |  |  |
| 8148358 | NM_016018   | PHF20L1   | PHD finger protein 20-like 1        | -0.048 | 0.968 | 7.37E-01 | 7.37E+01 |  |  |
| 8148385 | NM_003235   | TG        | thyroglobulin                       | -0.084 | 0.944 | 1.82E-01 | 1.82E+01 |  |  |
| 8148435 | NM_003882   | WISP1     | WNT1 inducible signaling pathway    | -0.052 | 0.965 | 5.88E-01 | 5.88E+01 |  |  |
| 8148448 | NM_006558   | KHDRBS3   | KH domain containing, RNA bindin    | -0.068 | 0.954 | 4.58E-01 | 4.58E+01 |  |  |
| 8148467 | NM_017444   | CHRA1     | chromatin accessibility complex 1   | 0.045  | 1.031 | 7.46E-01 | 7.46E+01 |  |  |
| 8148474 | ---         | ---       | ---                                 | -0.068 | 0.954 | 7.19E-01 | 7.19E+01 |  |  |
| 8148476 | NM_014957   | DENND3    | DENN/MADD domain containing 3       | -0.070 | 0.953 | 6.20E-01 | 6.20E+01 |  |  |
| 8148501 | NM_032611   | PTP4A3    | protein tyrosine phosphatase type   | -0.002 | 0.999 | 9.91E-01 | 9.91E+01 |  |  |
| 8148512 | NM_207414   | FLJ43860  | FLJ43860 protein                    | -0.072 | 0.951 | 6.05E-01 | 6.05E+01 |  |  |
| 8148517 | NM_001702   | BAI1      | brain-specific angiogenesis inhibi  | -0.008 | 0.994 | 9.53E-01 | 9.53E+01 |  |  |
| 8148548 | NM_005672   | PSCA      | prostate stem cell antigen          | -0.051 | 0.965 | 6.51E-01 | 6.51E+01 |  |  |
| 8148559 | NM_016647   | C8orf55   | chromosome 8 open reading fram      | -0.042 | 0.971 | 7.60E-01 | 7.60E+01 |  |  |
| 8148572 | NM_002346   | LY6E      | lymphocyte antigen 6 complex, lo    | 0.186  | 1.138 | 5.16E-01 | 5.16E+01 |  |  |
| 8148591 | NM_178172   | GPIHBP1   | glycosylphosphatidylinositol anch   | -0.001 | 1.000 | 9.98E-01 | 9.98E+01 |  |  |
| 8148597 | NM_173832   | ZFP41     | zinc finger protein 41 homolog (m   | 0.021  | 1.015 | 8.85E-01 | 8.85E+01 |  |  |
| 8148607 | NM_138465   | GLI4      | GLI family zinc finger 4            | 0.002  | 1.001 | 9.91E-01 | 9.91E+01 |  |  |
| 8148615 | NM_030895   | ZNF696    | zinc finger protein 696             | 0.019  | 1.013 | 8.92E-01 | 8.92E+01 |  |  |
| 8148619 | ---         | ---       | ---                                 | 0.065  | 1.046 | 5.61E-01 | 5.61E+01 |  |  |
| 8148621 | NM_052924   | RHPN1     | rhophilin, Rho GTPase binding pro   | -0.034 | 0.977 | 8.04E-01 | 8.04E+01 |  |  |
| 8148640 | ---         | ---       | ---                                 | -0.084 | 0.943 | 7.10E-01 | 7.10E+01 |  |  |
| 8148642 | NM_024736   | GSDMD     | gasdermin D                         | -0.024 | 0.983 | 8.93E-01 | 8.93E+01 |  |  |
| 8148655 | NM_032862   | TIGD5     | tigger transposable element deriv   | -0.075 | 0.949 | 2.26E-01 | 2.26E+01 |  |  |
| 8148658 | NM_014789   | ZNF623    | zinc finger protein 623             | 0.044  | 1.031 | 8.27E-01 | 8.27E+01 |  |  |
| 8148662 | NM_173831   | ZNF707    | zinc finger protein 707             | 0.083  | 1.059 | 5.24E-01 | 5.24E+01 |  |  |
| 8148674 | NM_139021   | MAPK15    | mitogen-activated protein kinase    | -0.020 | 0.986 | 8.69E-01 | 8.69E+01 |  |  |
| 8148694 | NM_000837   | GRINA     | glutamate receptor, ionotropic, N   | 0.152  | 1.111 | 5.52E-01 | 5.52E+01 |  |  |
| 8148703 | NM_198572   | SPATC1    | spermatogenesis and centriole ass   | -0.006 | 0.996 | 9.75E-01 | 9.75E+01 |  |  |
| 8148710 | NM_019037   | EXOSC4    | exosome component 4                 | -0.059 | 0.960 | 6.73E-01 | 6.73E+01 |  |  |
| 8148715 | NM_003801   | GPA1      | glycosylphosphatidylinositol anch   | -0.053 | 0.964 | 5.73E-01 | 5.73E+01 |  |  |
| 8148728 | NM_001916   | CYC1      | cytochrome c-1                      | -0.026 | 0.982 | 8.79E-01 | 8.79E+01 |  |  |
| 8148737 | NM_032272   | MAF1      | MAF1 homolog (S. cerevisiae)        | 0.001  | 1.001 | 9.96E-01 | 9.96E+01 |  |  |
| 8148748 | NR_024207   | KIAA1875  | KIAA1875                            | -0.029 | 0.980 | 7.87E-01 | 7.87E+01 |  |  |
| 8148772 | NM_016458   | C8orf30A  | chromosome 8 open reading fram      | 0.008  | 1.005 | 9.64E-01 | 9.64E+01 |  |  |
| 8148783 | NM_032450   | HEATR7A   | HEAT repeat containing 7A           | -0.105 | 0.930 | 3.45E-01 | 3.45E+01 |  |  |
| 8148796 | NM_00100827 | SCXA      | scleraxis homolog A (mouse)         | -0.040 | 0.973 | 7.72E-01 | 7.72E+01 |  |  |
| 8148799 | NM_016458   | C8orf30A  | chromosome 8 open reading fram      | -0.004 | 0.997 | 9.84E-01 | 9.84E+01 |  |  |
| 8148808 | NM_032450   | HEATR7A   | HEAT repeat containing 7A           | 0.019  | 1.014 | 8.80E-01 | 8.80E+01 |  |  |
| 8148821 | NM_00100827 | SCXA      | scleraxis homolog A (mouse)         | -0.040 | 0.973 | 7.72E-01 | 7.72E+01 |  |  |
| 8148824 | NM_005526   | HSF1      | heat shock transcription factor 1   | -0.057 | 0.961 | 5.52E-01 | 5.52E+01 |  |  |
| 8148841 | NM_024531   | GPR172A   | G protein-coupled receptor 172A     | -0.017 | 0.988 | 9.07E-01 | 9.07E+01 |  |  |
| 8148850 | NM_174922   | ADCK5     | aarF domain containing kinase 5     | -0.021 | 0.985 | 8.05E-01 | 8.05E+01 |  |  |
| 8148867 | NM_145754   | KIFC2     | kinesin family member C2            | -0.074 | 0.950 | 4.03E-01 | 4.03E+01 |  |  |
| 8148888 | NM_032902   | PPP1R16A  | protein phosphatase 1, regulatory   | -0.034 | 0.977 | 7.76E-01 | 7.76E+01 |  |  |
| 8148902 | NM_005309   | GPT       | glutamic-pyruvate transaminase (z   | -0.031 | 0.979 | 8.35E-01 | 8.35E+01 |  |  |
| 8148917 | NM_138431   | MFSD3     | major facilitator superfamily doma  | -0.015 | 0.990 | 9.22E-01 | 9.22E+01 |  |  |
| 8148923 | NM_014665   | LRRC14    | leucine rich repeat containing 14   | -0.055 | 0.963 | 5.60E-01 | 5.60E+01 |  |  |
| 8148930 | ---         | ---       | ---                                 | -0.043 | 0.971 | 7.40E-01 | 7.40E+01 |  |  |
| 8148932 | NM_213605   | ZNF517    | zinc finger protein 517             | -0.040 | 0.973 | 7.14E-01 | 7.14E+01 |  |  |
| 8148941 | NM_003416   | ZNF7      | zinc finger protein 7               | 0.031  | 1.022 | 8.35E-01 | 8.35E+01 |  |  |
| 8148949 | NR_002807   | TMED10P   | transmembrane emp24-like traffid    | 0.097  | 1.070 | 5.95E-01 | 5.95E+01 |  |  |
| 8148951 | NR_026974   | C8orf77   | chromosome 8 open reading fram      | -0.129 | 0.914 | 6.26E-02 | 6.26E+00 |  |  |
| 8148955 | NM_023080   | C8orf33   | chromosome 8 open reading fram      | -0.063 | 0.957 | 6.41E-01 | 6.41E+01 |  |  |
| 8148964 | NM_207366   | 40A35     | septin 14                           | -0.030 | 0.979 | 9.19E-01 | 9.19E+01 |  |  |
| 8148968 | BC037297    | FAM87A    | family with sequence similarity 87  | -0.026 | 0.982 | 8.62E-01 | 8.62E+01 |  |  |
| 8148982 | AK128318    | LOC389607 | hypothetical LOC389607              | 0.068  | 1.048 | 8.04E-01 | 8.04E+01 |  |  |
| 8148985 | NM_207332   | ERIC1     | glutamate-rich 1                    | 0.080  | 1.057 | 3.93E-01 | 3.93E+01 |  |  |
| 8149071 | NM_001147   | ANGPT2    | angiotensinogen 2                   | 0.051  | 1.036 | 8.47E-01 | 8.47E+01 |  |  |
| 8149104 | NM_001926   | DEFA6     | defensin, alpha 6, Paneth cell-spec | -0.028 | 0.981 | 8.76E-01 | 8.76E+01 |  |  |
| 8149116 | NM_005217   | DEFA3     | defensin, alpha 3, neutrophil-spec  | 0.033  | 1.023 | 9.22E-01 | 9.22E+01 |  |  |
| 8149122 | AF355799    | DEFT1P    | defensin, theta 1 pseudogene        | -0.004 | 0.998 | 9.85E-01 | 9.85E+01 |  |  |
| 8149126 | NM_005217   | DEFA3     | defensin, alpha 3, neutrophil-spec  | 0.033  | 1.023 | 9.22E-01 | 9.22E+01 |  |  |
| 8149132 | AF355799    | DEFT1P    | defensin, theta 1 pseudogene        | -0.004 | 0.998 | 9.85E-01 | 9.85E+01 |  |  |
| 8149137 | NM_005217   | DEFA3     | defensin, alpha 3, neutrophil-spec  | 0.033  | 1.023 | 9.22E-01 | 9.22E+01 |  |  |
| 8149146 | ---         | ---       | ---                                 | -0.082 | 0.945 | 2.17E-01 | 2.17E+01 |  |  |

|         |              |                  |                                      |        |       |          |          |  |  |
|---------|--------------|------------------|--------------------------------------|--------|-------|----------|----------|--|--|
| 8149148 | ENST00000420 | OR7E125P         | olfactory receptor, family 7, subfa  | 0.002  | 1.001 | 9.90E-01 | 9.90E+01 |  |  |
| 8149151 | NR_027000    | LOC349196        | hypothetical LOC349196               | -0.069 | 0.953 | 6.55E-01 | 6.55E+01 |  |  |
| 8149153 | NR_027000    | LOC349196        | hypothetical LOC349196               | -0.059 | 0.960 | 7.03E-01 | 7.03E+01 |  |  |
| 8149157 | NR_027000    | LOC349196        | hypothetical LOC349196               | -0.059 | 0.960 | 7.03E-01 | 7.03E+01 |  |  |
| 8149161 | NR_027000    | LOC349196        | hypothetical LOC349196               | -0.037 | 0.974 | 8.10E-01 | 8.10E+01 |  |  |
| 8149165 | NR_027000    | LOC349196        | hypothetical LOC349196               | -0.073 | 0.951 | 6.74E-01 | 6.74E+01 |  |  |
| 8149167 | NR_027000    | LOC349196        | hypothetical LOC349196               | -0.073 | 0.951 | 6.74E-01 | 6.74E+01 |  |  |
| 8149204 | NM_018088    | FAM90A1          | family with sequence similarity 90   | -0.039 | 0.973 | 7.52E-01 | 7.52E+01 |  |  |
| 8149208 | ENST00000420 | OR7E125P         | olfactory receptor, family 7, subfa  | -0.019 | 0.987 | 9.36E-01 | 9.36E+01 |  |  |
| 8149210 | NR_027000    | LOC349196        | hypothetical LOC349196               | -0.037 | 0.974 | 8.10E-01 | 8.10E+01 |  |  |
| 8149214 | NR_027000    | LOC349196        | hypothetical LOC349196               | -0.069 | 0.953 | 6.55E-01 | 6.55E+01 |  |  |
| 8149216 | NR_027000    | LOC349196        | hypothetical LOC349196               | -0.110 | 0.926 | 5.24E-01 | 5.24E+01 |  |  |
| 8149218 | NR_027000    | LOC349196        | hypothetical LOC349196               | -0.077 | 0.948 | 6.76E-01 | 6.76E+01 |  |  |
| 8149220 | NR_027000    | LOC349196        | hypothetical LOC349196               | -0.077 | 0.948 | 6.76E-01 | 6.76E+01 |  |  |
| 8149222 | NR_027000    | LOC349196        | hypothetical LOC349196               | -0.077 | 0.948 | 6.76E-01 | 6.76E+01 |  |  |
| 8149224 | NR_027000    | LOC349196        | hypothetical LOC349196               | -0.077 | 0.948 | 6.76E-01 | 6.76E+01 |  |  |
| 8149226 | NR_027000    | LOC349196        | hypothetical LOC349196               | -0.077 | 0.948 | 6.76E-01 | 6.76E+01 |  |  |
| 8149228 | NR_027000    | LOC349196        | hypothetical LOC349196               | -0.110 | 0.927 | 6.42E-01 | 6.42E+01 |  |  |
| 8149241 | NM_201402    | USP17L2          | ubiquitin specific peptidase 17-like | 0.011  | 1.007 | 9.60E-01 | 9.60E+01 |  |  |
| 8149243 | NM_201402    | //P17L2 // USP17 | ubiquitin specific peptidase 17-like | -0.026 | 0.982 | 8.78E-01 | 8.78E+01 |  |  |
| 8149245 | NR_003668    | DEFB109P18       | defensin, beta 109, pseudogene 1     | 0.119  | 1.086 | 8.08E-01 | 8.08E+01 |  |  |
| 8149248 | ---          | ---              | ---                                  | 0.026  | 1.018 | 9.74E-01 | 9.74E+01 |  |  |
| 8149250 | NM_00108082  | PRAGMIN          | homolog of rat pragma of Rnd2        | -0.041 | 0.972 | 7.02E-01 | 7.02E+01 |  |  |
| 8149256 | ---          | ---              | ---                                  | -0.048 | 0.967 | 7.15E-01 | 7.15E+01 |  |  |
| 8149258 | NM_004225    | MFHAS1           | malignant fibrous histiocytoma an    | -0.201 | 0.870 | 1.28E-01 | 1.28E+01 |  |  |
| 8149264 | NM_024607    | PPP1R3B          | protein phosphatase 1, regulatory    | -0.249 | 0.842 | 1.68E-03 | 1.68E-01 |  |  |
| 8149273 | ---          | ---              | ---                                  | -0.074 | 0.950 | 8.30E-01 | 8.30E+01 |  |  |
| 8149279 | ---          | ---              | ---                                  | 0.015  | 1.011 | 9.53E-01 | 9.53E+01 |  |  |
| 8149283 | NM_178857    | RP1L1            | retinitis pigmentosa 1-like 1        | 0.003  | 1.002 | 9.87E-01 | 9.87E+01 |  |  |
| 8149289 | NM_031439    | SOX7             | SRY (sex determining region Y)-bo    | -0.054 | 0.963 | 6.66E-01 | 6.66E+01 |  |  |
| 8149296 | NM_017884    | PINX1            | PIN2-interacting protein 1           | -0.009 | 0.993 | 9.75E-01 | 9.75E+01 |  |  |
| 8149307 | NM_173683    | XKR6             | XK, Kell blood group complex subu    | -0.083 | 0.944 | 3.76E-01 | 3.76E+01 |  |  |
| 8149315 | BC132953     | C8orf15          | chromosome 8 open reading fram       | 0.061  | 1.043 | 8.14E-01 | 8.14E+01 |  |  |
| 8149345 | ---          | ---              | ---                                  | 0.028  | 1.020 | 8.99E-01 | 8.99E+01 |  |  |
| 8149356 | NM_201402    | //P17L2 // USP17 | ubiquitin specific peptidase 17-like | -0.026 | 0.982 | 8.86E-01 | 8.86E+01 |  |  |
| 8149358 | NR_003668    | DEFB109P18       | defensin, beta 109, pseudogene 1     | 0.071  | 1.051 | 8.99E-01 | 8.99E+01 |  |  |
| 8149361 | NM_018088    | FAM90A1          | family with sequence similarity 90   | -0.051 | 0.965 | 7.40E-01 | 7.40E+01 |  |  |
| 8149365 | NR_003494    | FAM86B1          | family with sequence similarity 86   | 0.004  | 1.003 | 9.83E-01 | 9.83E+01 |  |  |
| 8149380 | NR_003668    | DEFB109P18       | defensin, beta 109, pseudogene 1     | 0.160  | 1.117 | 7.58E-01 | 7.58E+01 |  |  |
| 8149383 | NM_018088    | FAM90A1          | family with sequence similarity 90   | -0.050 | 0.966 | 7.82E-01 | 7.82E+01 |  |  |
| 8149387 | NR_003494    | FAM86B1          | family with sequence similarity 86   | 0.105  | 1.075 | 6.80E-01 | 6.80E+01 |  |  |
| 8149389 | NR_003494    | FAM86B1          | family with sequence similarity 86   | -0.014 | 0.990 | 9.45E-01 | 9.45E+01 |  |  |
| 8149399 | NM_152271    | LONRF1           | LON peptidase N-terminal domain      | 0.109  | 1.079 | 4.11E-01 | 4.11E+01 |  |  |
| 8149465 | NM_019851    | FGF20            | fibroblast growth factor 20          | 0.000  | 1.000 | 1.00E+00 | 1.00E+02 |  |  |
| 8149475 | NM_013354    | CNOT7            | CCR4-NOT transcription complex,      | -0.005 | 0.997 | 9.79E-01 | 9.79E+01 |  |  |
| 8149555 | NM_015310    | PSD3             | pleckstrin and Sec7 domain contai    | -0.100 | 0.933 | 7.38E-01 | 7.38E+01 |  |  |
| 8149574 | NM_018371    | CSGALNACT1       | chondroitin sulfate N-acetylgalact   | -0.298 | 0.813 | 8.23E-02 | 8.23E+00 |  |  |
| 8149590 | ---          | ---              | ---                                  | -0.324 | 0.799 | 1.17E-01 | 1.17E+01 |  |  |
| 8149612 | NM_021020    | LZTS1            | leucine zipper, putative tumor sup   | -0.044 | 0.970 | 7.51E-01 | 7.51E+01 |  |  |
| 8149629 | NM_001495    | GFRA2            | GDNF family receptor alpha 2         | 0.134  | 1.098 | 3.51E-01 | 3.51E+01 |  |  |
| 8149638 | NM_003974    | DOK2             | docking protein 2, 56kDa             | 0.316  | 1.245 | 4.74E-03 | 4.74E-01 |  |  |
| 8149646 | NM_024815    | NUDT18           | nudix (nucleoside diphosphate lin    | -0.033 | 0.977 | 7.79E-01 | 7.79E+01 |  |  |
| 8149652 | NM_005144    | HR               | hairless homolog (mouse)             | -0.008 | 0.995 | 9.53E-01 | 9.53E+01 |  |  |
| 8149673 | NM_025232    | REEP4            | receptor accessory protein 4         | 0.127  | 1.092 | 2.93E-01 | 2.93E+01 |  |  |
| 8149685 | NM_139278    | LGI3             | leucine-rich repeat LGI family, me   | -0.003 | 0.998 | 9.86E-01 | 9.86E+01 |  |  |
| 8149699 | NM_00109933  | PHYHIP           | phytanoyl-CoA 2-hydroxylase inte     | -0.035 | 0.976 | 7.99E-01 | 7.99E+01 |  |  |
| 8149705 | ---          | ---              | ---                                  | -0.052 | 0.964 | 7.14E-01 | 7.14E+01 |  |  |
| 8149707 | NM_018688    | BIN3             | bridging integrator 3                | -0.094 | 0.937 | 4.59E-01 | 4.59E+01 |  |  |
| 8149720 | NM_004430    | EGR3             | early growth response 3              | 0.040  | 1.028 | 8.31E-01 | 8.31E+01 |  |  |
| 8149733 | NM_003842    | TNFRSF10B        | tumor necrosis factor receptor sug   | -0.012 | 0.992 | 9.57E-01 | 9.57E+01 |  |  |
| 8149749 | NM_003840    | TNFRSF10D        | tumor necrosis factor receptor sug   | -0.023 | 0.984 | 8.96E-01 | 8.96E+01 |  |  |
| 8149762 | NM_003844    | TNFRSF10A        | tumor necrosis factor receptor sug   | 0.123  | 1.089 | 3.81E-01 | 3.81E+01 |  |  |
| 8149774 | NM_002318    | LOXL2            | lysyl oxidase-like 2                 | -0.062 | 0.958 | 5.95E-01 | 5.95E+01 |  |  |
| 8149793 | NM_004901    | ENTPD4           | ectonucleoside triphosphate diph     | -0.045 | 0.970 | 7.50E-01 | 7.50E+01 |  |  |
| 8149809 | ---          | ---              | ---                                  | -0.205 | 0.868 | 3.76E-02 | 3.76E+00 |  |  |
| 8149811 | NM_006167    | NKX3-1           | NK3 homeobox 1                       | -0.047 | 0.968 | 6.29E-01 | 6.29E+01 |  |  |
| 8149820 | NM_00113627  | NKX2-6           | NK2 transcription factor related, l  | -0.056 | 0.962 | 6.11E-01 | 6.11E+01 |  |  |
| 8149833 | ---          | ---              | ---                                  | -0.072 | 0.951 | 4.71E-01 | 4.71E+01 |  |  |
| 8149835 | NM_006158    | NEFL             | neurofilament, light polypeptide     | -0.041 | 0.972 | 7.93E-01 | 7.93E+01 |  |  |
| 8149847 | ---          | ---              | ---                                  | 0.007  | 1.005 | 9.72E-01 | 9.72E+01 |  |  |
| 8149849 | NM_000825    | GNRH1            | gonadotropin-releasing hormone       | -0.075 | 0.949 | 6.95E-01 | 6.95E+01 |  |  |
| 8149857 | NM_017634    | KCTD9            | potassium channel tetramerisation    | -0.016 | 0.989 | 9.23E-01 | 9.23E+01 |  |  |
| 8149898 | NM_030795    | STMN4            | stathmin-like 4                      | 0.014  | 1.010 | 9.27E-01 | 9.27E+01 |  |  |
| 8149907 | NM_171982    | TRIM35           | tripartite motif-containing 35       | 0.002  | 1.002 | 9.88E-01 | 9.88E+01 |  |  |
| 8149918 | NM_000742    | CHRNA2           | cholinergic receptor, nicotinic, alp | -0.014 | 0.990 | 9.29E-01 | 9.29E+01 |  |  |
| 8149927 | NM_001831    | CLU              | clusterin                            | -0.114 | 0.924 | 4.91E-01 | 4.91E+01 |  |  |
| 8149942 | NM_018246    | CCDC25           | coiled-coil domain containing 25     | 0.061  | 1.043 | 7.45E-01 | 7.45E+01 |  |  |

|         |             |             |                                      |        |       |          |          |  |  |
|---------|-------------|-------------|--------------------------------------|--------|-------|----------|----------|--|--|
| 8149966 | NM_173833   | SCARA5      | scavenger receptor class A, memb     | -0.068 | 0.954 | 6.39E-01 | 6.39E+01 |  |  |
| 8149986 | NM_018660   | ZNF395      | zinc finger protein 395              | -0.061 | 0.958 | 5.71E-01 | 5.71E+01 |  |  |
| 8150014 | NM_018250   | INTS9       | integrator complex subunit 9         | 0.116  | 1.084 | 3.16E-01 | 3.16E+01 |  |  |
| 8150032 | ---         | ---         | ---                                  | 0.008  | 1.005 | 9.79E-01 | 9.79E+01 |  |  |
| 8150034 | ---         | ---         | ---                                  | 0.102  | 1.073 | 8.46E-01 | 8.46E+01 |  |  |
| 8150036 | NM_015254   | KIF13B      | kinesin family member 13B            | 0.003  | 1.002 | 9.89E-01 | 9.89E+01 |  |  |
| 8150087 | ---         | ---         | ---                                  | -0.040 | 0.973 | 8.48E-01 | 8.48E+01 |  |  |
| 8150089 | NM_016127   | TMEM66      | transmembrane protein 66             | -0.043 | 0.971 | 6.00E-01 | 6.00E+01 |  |  |
| 8150099 | NM_00110091 | MBOAT4      | membrane bound O-acyltransfera       | -0.146 | 0.904 | 1.70E-01 | 1.70E+01 |  |  |
| 8150101 | ---         | ---         | ---                                  | 0.028  | 1.019 | 9.63E-01 | 9.63E+01 |  |  |
| 8150103 | NM_002095   | GTF2E2      | general transcription factor IIE, po | 0.097  | 1.069 | 4.51E-01 | 4.51E+01 |  |  |
| 8150112 | NM_000637   | GSR         | glutathione reductase                | 0.150  | 1.109 | 3.74E-01 | 3.74E+01 |  |  |
| 8150126 | NM_00100955 | PPP2CB      | protein phosphatase 2 (formerly 2    | -0.013 | 0.991 | 9.63E-01 | 9.63E+01 |  |  |
| 8150149 | ---         | ---         | ---                                  | -0.055 | 0.963 | 8.23E-01 | 8.23E+01 |  |  |
| 8150165 | NM_032664   | FUT10       | fucosyltransferase 10 (alpha (1,3)   | -0.049 | 0.967 | 8.07E-01 | 8.07E+01 |  |  |
| 8150175 | NM_025115   | C8orf41     | chromosome 8 open reading fram       | 0.003  | 1.002 | 9.90E-01 | 9.90E+01 |  |  |
| 8150186 | NM_024787   | RNF122      | ring finger protein 122              | 0.092  | 1.066 | 6.51E-01 | 6.51E+01 |  |  |
| 8150197 | NM_024025   | DUSP26      | dual specificity phosphatase 26 (p   | -0.020 | 0.986 | 9.12E-01 | 9.12E+01 |  |  |
| 8150204 | ---         | ---         | ---                                  | -0.048 | 0.967 | 8.16E-01 | 8.16E+01 |  |  |
| 8150206 | NM_152344   | LSM12       | LSM12 homolog (S. cerevisiae)        | 0.059  | 1.042 | 5.35E-01 | 5.35E+01 |  |  |
| 8150214 | ---         | ---         | ---                                  | -0.031 | 0.979 | 8.66E-01 | 8.66E+01 |  |  |
| 8150217 | NR_003671   | hCG_1640171 | hCG1640171                           | -0.121 | 0.919 | 5.98E-01 | 5.98E+01 |  |  |
| 8150219 | NM_018310   | BRF2        | BRF2, subunit of RNA polymerase      | -0.010 | 0.993 | 9.63E-01 | 9.63E+01 |  |  |
| 8150225 | NM_00100281 | RAB11FIP1   | RAB11 family interacting protein 1   | 0.001  | 1.001 | 9.92E-01 | 9.92E+01 |  |  |
| 8150244 | NM_152413   | GOT1L1      | glutamic-oxaloacetic transaminase    | -0.073 | 0.951 | 6.48E-01 | 6.48E+01 |  |  |
| 8150249 | NM_000025   | ADRB3       | adrenergic, beta-3-, receptor        | -0.021 | 0.986 | 9.15E-01 | 9.15E+01 |  |  |
| 8150253 | NM_000349   | STAR        | steroidogenic acute regulatory pro   | 0.001  | 1.001 | 9.95E-01 | 9.95E+01 |  |  |
| 8150266 | NM_014462   | LSM1        | LSM1 homolog, U6 small nuclear R     | 0.061  | 1.043 | 7.57E-01 | 7.57E+01 |  |  |
| 8150274 | ---         | ---         | ---                                  | 0.052  | 1.037 | 6.76E-01 | 6.76E+01 |  |  |
| 8150276 | NM_00110255 | PPAPDC1B    | phosphatidic acid phosphatase typ    | 0.031  | 1.022 | 9.08E-01 | 9.08E+01 |  |  |
| 8150287 | NM_023034   | WHSC1L1     | Wolf-Hirschhorn syndrome candid      | 0.009  | 1.006 | 9.61E-01 | 9.61E+01 |  |  |
| 8150318 | NM_023110   | FGFR1       | fibroblast growth factor receptor 1  | -0.022 | 0.985 | 9.23E-01 | 9.23E+01 |  |  |
| 8150356 | NR_003129   | RNF5P1      | ring finger protein 5 pseudogene 1   | -0.028 | 0.981 | 8.95E-01 | 8.95E+01 |  |  |
| 8150428 | NM_003012   | SFRP1       | secreted frizzled-related protein 1  | -0.014 | 0.990 | 9.30E-01 | 9.30E+01 |  |  |
| 8150433 | NM_152568   | NKX6-3      | NK6 homeobox 3                       | 0.033  | 1.023 | 7.81E-01 | 7.81E+01 |  |  |
| 8150439 | NM_020476   | ANK1        | ankyrin 1, erythrocytic              | -0.042 | 0.971 | 6.35E-01 | 6.35E+01 |  |  |
| 8150489 | ---         | ---         | ---                                  | 0.046  | 1.032 | 7.68E-01 | 7.68E+01 |  |  |
| 8150491 | NM_00109941 | MYST3       | MYST histone acetyltransferase (n    | -0.122 | 0.919 | 2.61E-01 | 2.61E+01 |  |  |
| 8150509 | NM_000930   | PLAT        | plasminogen activator, tissue        | -0.070 | 0.953 | 4.93E-01 | 4.93E+01 |  |  |
| 8150537 | NM_006749   | SLC20A2     | solute carrier family 20 (phosphat   | -0.070 | 0.952 | 5.44E-01 | 5.44E+01 |  |  |
| 8150559 | NM_018105   | THAP1       | THAP domain containing, apoptos      | 0.034  | 1.024 | 8.65E-01 | 8.65E+01 |  |  |
| 8150565 | NM_00116022 | RNF170      | ring finger protein 170              | 0.161  | 1.118 | 2.53E-01 | 2.53E+01 |  |  |
| 8150576 | ---         | ---         | ---                                  | 0.038  | 1.027 | 9.18E-01 | 9.18E+01 |  |  |
| 8150578 | ---         | ---         | ---                                  | 0.031  | 1.022 | 7.88E-01 | 7.88E+01 |  |  |
| 8150592 | NM_005195   | CEBPD       | CCAAT/enhancer binding protein (     | -0.009 | 0.994 | 9.61E-01 | 9.61E+01 |  |  |
| 8150599 | NM_006904   | PRKDC       | protein kinase, DNA-activated, cat   | 0.062  | 1.044 | 6.04E-01 | 6.04E+01 |  |  |
| 8150689 | ---         | ---         | ---                                  | -0.056 | 0.962 | 8.84E-01 | 8.84E+01 |  |  |
| 8150714 | NM_052937   | PCMTD1      | protein-L-isoaspartate (D-aspartat   | -0.011 | 0.993 | 9.52E-01 | 9.52E+01 |  |  |
| 8150757 | NM_014781   | RB1CC1      | RB1-inducible coiled-coil 1          | -0.037 | 0.975 | 8.60E-01 | 8.60E+01 |  |  |
| 8150797 | NM_015941   | ATP6V1H     | ATPase, H+ transporting, lysosoma    | 0.008  | 1.006 | 9.82E-01 | 9.82E+01 |  |  |
| 8150818 | NM_006756   | TCEA1       | transcription elongation factor A (  | 0.015  | 1.010 | 9.00E-01 | 9.00E+01 |  |  |
| 8150830 | NM_006330   | LYPLA1      | lysophospholipase I                  | 0.062  | 1.044 | 7.60E-01 | 7.60E+01 |  |  |
| 8150842 | ---         | ---         | ---                                  | -0.272 | 0.828 | 1.81E-03 | 1.81E-01 |  |  |
| 8150844 | ---         | ---         | ---                                  | 0.008  | 1.006 | 9.67E-01 | 9.67E+01 |  |  |
| 8150860 | ---         | ---         | ---                                  | -0.004 | 0.998 | 9.86E-01 | 9.86E+01 |  |  |
| 8150862 | ---         | ---         | ---                                  | 0.408  | 1.327 | 1.07E-01 | 1.07E+01 |  |  |
| 8150864 | ---         | ---         | ---                                  | 0.032  | 1.022 | 8.45E-01 | 8.45E+01 |  |  |
| 8150866 | ---         | ---         | ---                                  | 0.212  | 1.158 | 4.71E-01 | 4.71E+01 |  |  |
| 8150870 | NM_002806   | PSMC6       | proteasome (prosome, macropain       | 0.056  | 1.039 | 7.86E-01 | 7.86E+01 |  |  |
| 8150872 | NM_001023   | RPS20       | ribosomal protein S20                | -0.016 | 0.989 | 8.99E-01 | 8.99E+01 |  |  |
| 8150877 | NR_002437   | SNORD54     | small nucleolar RNA, C/D box 54      | -0.139 | 0.908 | 7.68E-01 | 7.68E+01 |  |  |
| 8150881 | NM_002655   | PLAG1       | pleiomorphic adenoma gene 1          | 0.023  | 1.016 | 9.49E-01 | 9.49E+01 |  |  |
| 8150901 | NM_006211   | PENK        | proenkephalin                        | -0.037 | 0.975 | 7.73E-01 | 7.73E+01 |  |  |
| 8150906 | NM_017813   | IMPAD1      | inositol monophosphatase domain      | 0.123  | 1.089 | 5.49E-01 | 5.49E+01 |  |  |
| 8150908 | NM_017813   | IMPAD1      | inositol monophosphatase domain      | 0.074  | 1.053 | 5.08E-01 | 5.08E+01 |  |  |
| 8150928 | NM_003580   | NSMAF       | neutral sphingomyelinase (N-SMa      | 0.081  | 1.058 | 6.34E-01 | 6.34E+01 |  |  |
| 8150960 | ---         | ---         | ---                                  | 0.018  | 1.013 | 9.24E-01 | 9.24E+01 |  |  |
| 8150962 | NM_014729   | TOX         | thymocyte selection-associated hi    | 0.299  | 1.231 | 3.32E-02 | 3.32E+00 |  |  |
| 8150988 | NM_004318   | ASPH        | aspartate beta-hydroxylase           | -0.125 | 0.917 | 6.78E-01 | 6.78E+01 |  |  |
| 8151054 | ---         | ---         | ---                                  | -0.077 | 0.948 | 2.84E-01 | 2.84E+01 |  |  |
| 8151056 | NM_004820   | CYP7B1      | cytochrome P450, family 7, subfa     | -0.054 | 0.964 | 7.33E-01 | 7.33E+01 |  |  |
| 8151066 | NM_018120   | ARMC1       | armadillo repeat containing 1        | 0.100  | 1.072 | 5.52E-01 | 5.52E+01 |  |  |
| 8151074 | NM_002603   | PDE7A       | phosphodiesterase 7A                 | 0.172  | 1.126 | 2.35E-02 | 2.35E+00 |  |  |
| 8151099 | ---         | ---         | ---                                  | 0.053  | 1.037 | 8.25E-01 | 8.25E+01 |  |  |
| 8151101 | NM_00108041 | MYBL1       | v-myb myeloblastosis viral oncoge    | -0.081 | 0.945 | 8.82E-01 | 8.82E+01 |  |  |
| 8151118 | NM_025054   | VCP1P1      | valosin containing protein (p97)/p   | 0.071  | 1.050 | 3.51E-01 | 3.51E+01 |  |  |
| 8151123 | NR_002734   | PTTG3P      | pituitary tumor-transforming 3 (ps   | 0.073  | 1.052 | 7.94E-01 | 7.94E+01 |  |  |

|         |               |               |                                      |        |       |          |          |  |  |
|---------|---------------|---------------|--------------------------------------|--------|-------|----------|----------|--|--|
| 8151125 | ENST00000340  | TCF24         | transcription factor 24              | -0.029 | 0.980 | 8.21E-01 | 8.21E+01 |  |  |
| 8151136 | NM_006837     | COP55         | COP9 constitutive photomorphoge      | -0.026 | 0.982 | 8.80E-01 | 8.80E+01 |  |  |
| 8151149 | NM_006421     | ARFGEF1       | ADP-ribosylation factor guanine n    | 0.000  | 1.000 | 1.00E+00 | 1.00E+02 |  |  |
| 8151209 | ---           | ---           | ---                                  | 0.153  | 1.112 | 5.89E-01 | 5.89E+01 |  |  |
| 8151223 | NM_030958     | SLCO5A1       | solute carrier organic anion transp  | -0.179 | 0.883 | 1.37E-01 | 1.37E+01 |  |  |
| 8151252 | ---           | ---           | ---                                  | -0.147 | 0.903 | 2.74E-01 | 2.74E+01 |  |  |
| 8151254 | NM_006540     | NCOA2         | nuclear receptor coactivator 2       | -0.026 | 0.982 | 8.98E-01 | 8.98E+01 |  |  |
| 8151281 | NM_014294     | TRAM1         | translocation associated membrar     | 0.195  | 1.145 | 6.78E-03 | 6.78E-01 |  |  |
| 8151296 | NM_016027     | LACTB2        | lactamase, beta 2                    | 0.196  | 1.146 | 9.57E-02 | 9.57E+00 |  |  |
| 8151369 | NM_153225     | C8orf84       | chromosome 8 open reading fram       | 0.031  | 1.021 | 8.86E-01 | 8.86E+01 |  |  |
| 8151376 | NM_000971     | RPL7          | ribosomal protein L7                 | -0.025 | 0.983 | 8.82E-01 | 8.82E+01 |  |  |
| 8151384 | NM_014393     | STAU2         | staufen, RNA binding protein, hom    | -0.032 | 0.978 | 8.13E-01 | 8.13E+01 |  |  |
| 8151411 | ---           | ---           | ---                                  | -0.031 | 0.979 | 8.18E-01 | 8.18E+01 |  |  |
| 8151413 | NM_005648     | TCEB1         | transcription elongation factor B (  | 0.074  | 1.052 | 5.48E-01 | 5.48E+01 |  |  |
| 8151421 | ---           | ---           | ---                                  | 0.379  | 1.300 | 2.99E-01 | 2.99E+01 |  |  |
| 8151436 | NM_000318     | PXMP3         | peroxisomal membrane protein 3,      | 0.123  | 1.089 | 3.58E-01 | 3.58E+01 |  |  |
| 8151471 | NM_014018     | MRPS28        | mitochondrial ribosomal protein S    | -0.034 | 0.976 | 9.00E-01 | 9.00E+01 |  |  |
| 8151475 | NM_00102525   | TPD52         | tumor protein D52                    | 0.103  | 1.074 | 5.08E-01 | 5.08E+01 |  |  |
| 8151512 | NM_018440     | PAG1          | phosphoprotein associated with g     | -0.118 | 0.922 | 1.97E-01 | 1.97E+01 |  |  |
| 8151540 | ---           | ---           | ---                                  | -0.018 | 0.988 | 9.58E-01 | 9.58E+01 |  |  |
| 8151549 | NM_005536     | IMPA1         | inositol(myo)-1(or 4)-monophosph     | -0.040 | 0.972 | 7.81E-01 | 7.81E+01 |  |  |
| 8151561 | NM_024699     | ZFAND1        | zinc finger, AN1-type domain 1       | 0.002  | 1.002 | 9.95E-01 | 9.95E+01 |  |  |
| 8151603 | NR_003594     | REXO1L2P      | REX1, RNA exonuclease 1 homolog      | -0.008 | 0.994 | 9.54E-01 | 9.54E+01 |  |  |
| 8151605 | AF495523      | REXO1L1       | REX1, RNA exonuclease 1 homolog      | -0.177 | 0.885 | 1.78E-01 | 1.78E+01 |  |  |
| 8151607 | NR_003594     | REXO1L2P      | REX1, RNA exonuclease 1 homolog      | -0.008 | 0.994 | 9.54E-01 | 9.54E+01 |  |  |
| 8151609 | NM_172239     | REXO1L1       | REX1, RNA exonuclease 1 homolog      | -0.038 | 0.974 | 6.21E-01 | 6.21E+01 |  |  |
| 8151613 | AF495523      | REXO1L1       | REX1, RNA exonuclease 1 homolog      | -0.177 | 0.885 | 1.78E-01 | 1.78E+01 |  |  |
| 8151615 | 0             | 0             | 0                                    | 0.000  | 1.000 | 1.00E+00 | 1.00E+02 |  |  |
| 8151617 | AF495523 // A | // REXO1L1 // | REX1, RNA exonuclease 1 homolog      | -0.177 | 0.885 | 1.78E-01 | 1.78E+01 |  |  |
| 8151619 | NR_003594     | REXO1L2P      | REX1, RNA exonuclease 1 homolog      | -0.013 | 0.991 | 9.19E-01 | 9.19E+01 |  |  |
| 8151621 | AF495523      | REXO1L1       | REX1, RNA exonuclease 1 homolog      | -0.177 | 0.885 | 1.78E-01 | 1.78E+01 |  |  |
| 8151623 | NR_003594     | REXO1L2P      | REX1, RNA exonuclease 1 homolog      | -0.008 | 0.994 | 9.54E-01 | 9.54E+01 |  |  |
| 8151625 | AF495523      | REXO1L1       | REX1, RNA exonuclease 1 homolog      | -0.177 | 0.885 | 1.78E-01 | 1.78E+01 |  |  |
| 8151627 | 0             | 0             | 0                                    | -0.009 | 0.994 | 9.58E-01 | 9.58E+01 |  |  |
| 8151629 | 0             | 0             | 0                                    | -0.146 | 0.904 | 5.55E-01 | 5.55E+01 |  |  |
| 8151631 | NR_003594     | REXO1L2P      | REX1, RNA exonuclease 1 homolog      | 0.001  | 1.001 | 9.96E-01 | 9.96E+01 |  |  |
| 8151709 | ---           | ---           | ---                                  | 0.235  | 1.177 | 5.95E-01 | 5.95E+01 |  |  |
| 8151711 | NM_002485     | NBN           | nibrin                               | 0.033  | 1.023 | 9.49E-01 | 9.49E+01 |  |  |
| 8151747 | NM_00100849   | TMEM64        | transmembrane protein 64             | -0.028 | 0.981 | 8.33E-01 | 8.33E+01 |  |  |
| 8151784 | ---           | ---           | ---                                  | -0.013 | 0.991 | 9.49E-01 | 9.49E+01 |  |  |
| 8151788 | NM_203390     | RBM12B        | RNA binding motif protein 12B        | 0.061  | 1.043 | 5.34E-01 | 5.34E+01 |  |  |
| 8151816 | NM_005261     | GEM           | GTP binding protein overexpresse     | -0.078 | 0.947 | 7.54E-01 | 7.54E+01 |  |  |
| 8151842 | NM_015496     | KIAA1429      | KIAA1429                             | -0.018 | 0.987 | 9.30E-01 | 9.30E+01 |  |  |
| 8151869 | ---           | ---           | ---                                  | 0.018  | 1.012 | 9.49E-01 | 9.49E+01 |  |  |
| 8151890 | NM_033285     | TP53INP1      | tumor protein p53 inducible nucle    | 0.141  | 1.103 | 1.35E-01 | 1.35E+01 |  |  |
| 8151906 | NM_00100155   | GDF6          | growth differentiation factor 6      | -0.009 | 0.994 | 9.55E-01 | 9.55E+01 |  |  |
| 8151927 | ---           | ---           | ---                                  | 0.214  | 1.160 | 5.35E-01 | 5.35E+01 |  |  |
| 8151929 | ---           | ---           | ---                                  | -0.059 | 0.960 | 8.06E-01 | 8.06E+01 |  |  |
| 8151931 | NM_033512     | TSPYL5        | TSPY-like 5                          | 0.312  | 1.242 | 4.45E-02 | 4.45E+00 |  |  |
| 8151935 | NM_000989     | RPL30         | ribosomal protein L30                | 0.009  | 1.006 | 9.74E-01 | 9.74E+01 |  |  |
| 8151987 | ---           | ---           | ---                                  | 0.091  | 1.065 | 6.58E-01 | 6.58E+01 |  |  |
| 8151991 | ---           | ---           | ---                                  | 0.009  | 1.006 | 9.89E-01 | 9.89E+01 |  |  |
| 8151993 | NM_004374     | COX6C         | cytochrome c oxidase subunit VIc     | 0.027  | 1.019 | 8.89E-01 | 8.89E+01 |  |  |
| 8152041 | NM_183419     | RNF19A        | ring finger protein 19A              | 0.006  | 1.004 | 9.84E-01 | 9.84E+01 |  |  |
| 8152053 | NM_198401     | ANKRD46       | ankyrin repeat domain 46             | 0.031  | 1.021 | 9.11E-01 | 9.11E+01 |  |  |
| 8152079 | NM_002568     | PABPC1        | poly(A) binding protein, cytoplasm   | -0.022 | 0.985 | 9.12E-01 | 9.12E+01 |  |  |
| 8152096 | NM_145690     | YWHAZ         | tyrosine 3-monooxygenase/trypto      | 0.040  | 1.028 | 4.27E-01 | 4.27E+01 |  |  |
| 8152111 | NM_00104251   | ZNF706        | zinc finger protein 706              | 0.211  | 1.158 | 7.00E-02 | 7.00E+00 |  |  |
| 8152117 | ---           | ---           | ---                                  | -0.003 | 0.998 | 9.88E-01 | 9.88E+01 |  |  |
| 8152119 | NM_00104062   | NCALD         | neurocalcin delta                    | 0.010  | 1.007 | 9.78E-01 | 9.78E+01 |  |  |
| 8152133 | NM_015713     | RRM2B         | ribonucleotide reductase M2 B (TR    | 0.085  | 1.061 | 5.53E-01 | 5.53E+01 |  |  |
| 8152148 | NM_015902     | UBR5          | ubiquitin protein ligase E3 compo    | -0.052 | 0.964 | 6.87E-01 | 6.87E+01 |  |  |
| 8152211 | ---           | ---           | ---                                  | 0.166  | 1.122 | 6.80E-01 | 6.80E+01 |  |  |
| 8152215 | NM_005655     | KLF10         | Kruppel-like factor 10               | -0.038 | 0.974 | 8.33E-01 | 8.33E+01 |  |  |
| 8152222 | NM_015878     | AZIN1         | antizyme inhibitor 1                 | 0.056  | 1.040 | 7.41E-01 | 7.41E+01 |  |  |
| 8152240 | ---           | ---           | ---                                  | 0.087  | 1.062 | 7.04E-01 | 7.04E+01 |  |  |
| 8152255 | NM_030780     | SLC25A32      | solute carrier family 25, member 3   | 0.082  | 1.058 | 4.96E-01 | 4.96E+01 |  |  |
| 8152291 | NM_139166     | ABRA          | actin-binding Rho activating prote   | 0.126  | 1.091 | 2.57E-01 | 2.57E+01 |  |  |
| 8152323 | NM_001568     | EIF3E         | eukaryotic translation initiation fa | -0.032 | 0.978 | 8.78E-01 | 8.78E+01 |  |  |
| 8152333 | ---           | ---           | ---                                  | -0.108 | 0.928 | 6.46E-01 | 6.46E+01 |  |  |
| 8152369 | NM_014379     | KCNV1         | potassium channel, subfamily V, m    | -0.071 | 0.952 | 3.46E-01 | 3.46E+01 |  |  |
| 8152453 | NM_014112     | TRPS1         | trichorhinophalangeal syndrome I     | 0.026  | 1.018 | 9.49E-01 | 9.49E+01 |  |  |
| 8152465 | NM_003756     | EIF3H         | eukaryotic translation initiation fa | 0.020  | 1.014 | 8.88E-01 | 8.88E+01 |  |  |
| 8152477 | NM_006265     | RAD21         | RAD21 homolog (S. pombe)             | -0.037 | 0.975 | 6.57E-01 | 6.57E+01 |  |  |
| 8152491 | NM_000127     | EXT1          | exostosins (multiple) 1              | -0.196 | 0.873 | 4.36E-02 | 4.36E+00 |  |  |
| 8152553 | NM_003184     | TAF2          | TAF2 RNA polymerase II, TATA box     | 0.034  | 1.024 | 8.49E-01 | 8.49E+01 |  |  |
| 8152606 | NM_021021     | SNTB1         | syntrophin, beta 1 (dystrophin-ass   | 0.019  | 1.013 | 9.16E-01 | 9.16E+01 |  |  |

|         |             |              |                                      |        |       |          |          |  |  |
|---------|-------------|--------------|--------------------------------------|--------|-------|----------|----------|--|--|
| 8152626 | ---         | ---          | ---                                  | -0.055 | 0.963 | 9.00E-01 | 9.00E+01 |  |  |
| 8152628 | NM_024295   | DERL1        | Der1-like domain family, member      | 0.050  | 1.035 | 6.76E-01 | 6.76E+01 |  |  |
| 8152648 | BC067796    | C8orf76      | chromosome 8 open reading fram       | 0.170  | 1.125 | 6.47E-02 | 6.47E+00 |  |  |
| 8152656 | NM_00101792 | ZHX1         | zinc fingers and homeoboxes 1        | 0.165  | 1.121 | 6.06E-02 | 6.06E+00 |  |  |
| 8152666 | ---         | ---          | ---                                  | 0.201  | 1.150 | 2.84E-01 | 2.84E+01 |  |  |
| 8152668 | NM_014109   | ATAD2        | ATPase family, AAA domain conta      | 0.111  | 1.080 | 4.51E-01 | 4.51E+01 |  |  |
| 8152701 | ---         | ---          | ---                                  | 0.029  | 1.021 | 9.17E-01 | 9.17E+01 |  |  |
| 8152703 | NM_058229   | FBXO32       | F-box protein 32                     | -0.036 | 0.975 | 9.16E-01 | 9.16E+01 |  |  |
| 8152750 | NM_194291   | TMEM65       | transmembrane protein 65             | 0.053  | 1.037 | 7.40E-01 | 7.40E+01 |  |  |
| 8152759 | NR_027427   | TATDN1       | TatD DNase domain containing 1       | -0.025 | 0.983 | 8.89E-01 | 8.89E+01 |  |  |
| 8152764 | NM_014751   | MTSS1        | metastasis suppressor 1              | -0.197 | 0.872 | 3.28E-01 | 3.28E+01 |  |  |
| 8152782 | NM_014846   | KIAA0196     | KIAA0196                             | 0.133  | 1.097 | 4.71E-01 | 4.71E+01 |  |  |
| 8152812 | NM_174911   | FAM84B       | family with sequence similarity 84   | 0.143  | 1.104 | 3.56E-01 | 3.56E+01 |  |  |
| 8152815 | BC137383    | TMEM75       | transmembrane protein 75             | -0.065 | 0.956 | 7.64E-01 | 7.64E+01 |  |  |
| 8152819 | ---         | ---          | ---                                  | -0.082 | 0.945 | 6.57E-01 | 6.57E+01 |  |  |
| 8152845 | BC017297    | FAM49B       | family with sequence similarity 49   | 0.274  | 1.209 | 7.65E-03 | 7.65E-01 |  |  |
| 8152863 | ---         | ---          | ---                                  | 0.132  | 1.096 | 4.96E-01 | 4.96E+01 |  |  |
| 8152865 | ---         | ---          | ---                                  | 0.215  | 1.161 | 9.93E-02 | 9.93E+00 |  |  |
| 8152867 | NM_018482   | ASAP1        | ArtGAP with SH3 domain, ankyrin      | 0.133  | 1.097 | 5.23E-01 | 5.23E+01 |  |  |
| 8152900 | ---         | ---          | ---                                  | 0.342  | 1.268 | 2.67E-01 | 2.67E+01 |  |  |
| 8152902 | NM_001115   | ADCY8        | adenylate cyclase 8 (brain)          | -0.021 | 0.986 | 9.10E-01 | 9.10E+01 |  |  |
| 8152924 | NM_00108039 | OC90         | otoconin 90                          | -0.010 | 0.993 | 9.55E-01 | 9.55E+01 |  |  |
| 8152938 | NM_00114509 | HHLA1        | HERV-H LTR-associating 1             | -0.023 | 0.984 | 8.47E-01 | 8.47E+01 |  |  |
| 8152946 | NM_004519   | KCNQ3        | potassium voltage-gated channel,     | -0.035 | 0.976 | 7.56E-01 | 7.56E+01 |  |  |
| 8152976 | NM_144649   | TMEM71       | transmembrane protein 71             | 0.115  | 1.083 | 6.80E-01 | 6.80E+01 |  |  |
| 8152988 | NM_00104555 | SLA          | Src-like-adaptor                     | 0.048  | 1.034 | 8.48E-01 | 8.48E+01 |  |  |
| 8153021 | NM_003033   | ST3GAL1      | ST3 beta-galactoside alpha-2,3-sia   | -0.134 | 0.911 | 5.87E-01 | 5.87E+01 |  |  |
| 8153039 | ---         | ---          | ---                                  | 0.136  | 1.099 | 6.56E-01 | 6.56E+01 |  |  |
| 8153041 | ---         | ---          | ---                                  | -0.075 | 0.949 | 7.03E-01 | 7.03E+01 |  |  |
| 8153043 | NM_020863   | ZFAT         | zinc finger and AT hook domain co    | 0.032  | 1.022 | 8.65E-01 | 8.65E+01 |  |  |
| 8153101 | NM_152888   | COL22A1      | collagen, type XXII, alpha 1         | -0.031 | 0.979 | 7.71E-01 | 7.71E+01 |  |  |
| 8153167 | NM_016601   | KCNK9        | potassium channel, subfamily K, m    | 0.039  | 1.027 | 7.85E-01 | 7.85E+01 |  |  |
| 8153175 | NM_031466   | TRAPPC9      | trafficking protein particle comple  | -0.073 | 0.950 | 5.99E-01 | 5.99E+01 |  |  |
| 8153201 | NM_012154   | EIF2C2       | eukaryotic translation initiation fa | -0.119 | 0.921 | 1.52E-01 | 1.52E+01 |  |  |
| 8153223 | NM_153831   | PTK2         | PTK2 protein tyrosine kinase 2       | 0.020  | 1.014 | 9.53E-01 | 9.53E+01 |  |  |
| 8153258 | BC033223    | SLC45A4      | solute carrier family 45, member 4   | 0.026  | 1.018 | 9.56E-01 | 9.56E+01 |  |  |
| 8153269 | NM_005293   | GPR20        | G protein-coupled receptor 20        | -0.029 | 0.980 | 8.24E-01 | 8.24E+01 |  |  |
| 8153273 | NM_207414   | FLJ43860     | FLJ43860 protein                     | 0.030  | 1.021 | 8.27E-01 | 8.27E+01 |  |  |
| 8153304 | NM_145003   | TSNARE1      | t-SNARE domain containing 1          | -0.087 | 0.942 | 3.59E-01 | 3.59E+01 |  |  |
| 8153320 | ---         | ---          | ---                                  | 0.045  | 1.032 | 6.58E-01 | 6.58E+01 |  |  |
| 8153322 | NM_015193   | ARC          | activity-regulated cytoskeleton-as   | -0.046 | 0.968 | 6.62E-01 | 6.62E+01 |  |  |
| 8153328 | NM_003724   | JRK          | jerky homolog (mouse)                | -0.022 | 0.985 | 9.00E-01 | 9.00E+01 |  |  |
| 8153334 | NM_005672   | PSCA         | prostate stem cell antigen           | 0.031  | 1.022 | 8.36E-01 | 8.36E+01 |  |  |
| 8153336 | NM_020427   | SLURP1       | secreted LY6/PLAUR domain conta      | 0.041  | 1.028 | 7.23E-01 | 7.23E+01 |  |  |
| 8153342 | NM_205545   | LYPD2        | LY6/PLAUR domain containing 2        | -0.001 | 1.000 | 9.98E-01 | 9.98E+01 |  |  |
| 8153346 | NM_023946   | LYNX1        | Ly6/neurotoxin 1                     | -0.008 | 0.994 | 9.53E-01 | 9.53E+01 |  |  |
| 8153359 | NM_003695   | LY6D         | lymphocyte antigen 6 complex, lo     | -0.050 | 0.966 | 6.02E-01 | 6.02E+01 |  |  |
| 8153363 | NM_000497   | CYP11B1      | cytochrome P450, family 11, subfa    | 0.011  | 1.008 | 9.53E-01 | 9.53E+01 |  |  |
| 8153373 | NM_000498   | CYP11B2      | cytochrome P450, family 11, subfa    | 0.014  | 1.009 | 9.34E-01 | 9.34E+01 |  |  |
| 8153380 | NM_00113565 | LY6H         | lymphocyte antigen 6 complex, lo     | -0.018 | 0.988 | 9.19E-01 | 9.19E+01 |  |  |
| 8153390 | NM_052963   | TOP1MT       | topoisomerase (DNA) I, mitochond     | 0.089  | 1.064 | 4.75E-01 | 4.75E+01 |  |  |
| 8153405 | NR_026785   | C8orf51      | chromosome 8 open reading fram       | -0.008 | 0.994 | 9.67E-01 | 9.67E+01 |  |  |
| 8153409 | NM_201589   | MAFA         | v-maf musculoaponeurotic fibrosa     | 0.013  | 1.009 | 9.53E-01 | 9.53E+01 |  |  |
| 8153411 | NM_015117   | ZC3H3        | zinc finger CCH-type containing 3    | 0.101  | 1.073 | 1.31E-01 | 1.31E+01 |  |  |
| 8153424 | NM_00110087 | C8orf73      | chromosome 8 open reading fram       | -0.085 | 0.943 | 7.13E-01 | 7.13E+01 |  |  |
| 8153426 | NM_00110087 | C8orf73      | chromosome 8 open reading fram       | -0.057 | 0.961 | 8.04E-01 | 8.04E+01 |  |  |
| 8153430 | NM_145201   | NAPRT1       | nicotinate phosphoribosyltransfer    | 0.015  | 1.011 | 9.36E-01 | 9.36E+01 |  |  |
| 8153449 | NM_032378   | EEF1D        | eukaryotic translation elongation f  | 0.004  | 1.003 | 9.83E-01 | 9.83E+01 |  |  |
| 8153457 | AY358690    | EEF1D        | eukaryotic translation elongation f  | -0.181 | 0.882 | 1.34E-01 | 1.34E+01 |  |  |
| 8153459 | NM_023078   | PYCR1        | pyrroline-5-carboxylate reductase    | -0.029 | 0.980 | 7.94E-01 | 7.94E+01 |  |  |
| 8153474 | NM_003313   | TSTA3        | tissue specific transplantation anti | 0.019  | 1.014 | 9.16E-01 | 9.16E+01 |  |  |
| 8153486 | NM_00116291 | LOC100130274 | coiled-coil domain containing 121    | 0.012  | 1.008 | 9.56E-01 | 9.56E+01 |  |  |
| 8153488 | NM_198488   | FAM83H       | family with sequence similarity 83   | -0.047 | 0.968 | 6.16E-01 | 6.16E+01 |  |  |
| 8153497 | NM_182706   | SCRIB        | scribbled homolog (Drosophila)       | -0.076 | 0.949 | 2.77E-01 | 2.77E+01 |  |  |
| 8153536 | NM_00113603 | PUF60        | poly-U binding splicing factor 60Kd  | 0.018  | 1.012 | 8.97E-01 | 8.97E+01 |  |  |
| 8153550 | NM_178564   | NRBP2        | nuclear receptor binding protein 2   | -0.056 | 0.962 | 6.91E-01 | 6.91E+01 |  |  |
| 8153568 | NM_201384   | PLEC1        | plectin 1, intermediate filament bi  | -0.121 | 0.920 | 2.86E-03 | 2.86E-01 |  |  |
| 8153609 | NM_032789   | PARP10       | poly (ADP-ribose) polymerase fam     | -0.035 | 0.976 | 7.40E-01 | 7.40E+01 |  |  |
| 8153625 | NM_017570   | OPLAH        | 5-oxoprolinase (ATP-hydrolysing)     | -0.043 | 0.971 | 6.88E-01 | 6.88E+01 |  |  |
| 8153652 | NM_030974   | SHARPIN      | SHANK-associated RH domain inte      | -0.003 | 0.998 | 9.83E-01 | 9.83E+01 |  |  |
| 8153664 | NM_015201   | BOP1         | block of proliferation 1             | -0.039 | 0.974 | 6.84E-01 | 6.84E+01 |  |  |
| 8153678 | NM_015201   | BOP1         | block of proliferation 1             | -0.134 | 0.911 | 3.21E-02 | 3.21E+00 |  |  |
| 8153684 | NM_012079   | DGAT1        | diacylglycerol O-acyltransferase h   | -0.017 | 0.988 | 9.24E-01 | 9.24E+01 |  |  |
| 8153709 | NM_012162   | FBXL6        | F-box and leucine-rich repeat prot   | -0.089 | 0.940 | 3.48E-01 | 3.48E+01 |  |  |
| 8153727 | NM_013291   | CPSF1        | cleavage and polyadenylation spe     | -0.043 | 0.971 | 7.18E-01 | 7.18E+01 |  |  |
| 8153762 | NM_017767   | SLC39A4      | solute carrier family 39 (zinc trans | -0.004 | 0.998 | 9.82E-01 | 9.82E+01 |  |  |
| 8153776 | NM_183057   | VPS28        | vacuolar protein sorting 28 homol    | -0.006 | 0.996 | 9.76E-01 | 9.76E+01 |  |  |

|         |              |               |                                      |        |       |          |          |  |
|---------|--------------|---------------|--------------------------------------|--------|-------|----------|----------|--|
| 8153790 | NM_013432    | NFKBIL2       | nuclear factor of kappa light polyp  | -0.033 | 0.978 | 7.32E-01 | 7.32E+01 |  |
| 8153823 | NM_032687    | CYHR1         | cysteine/histidine-rich 1            | -0.041 | 0.972 | 7.47E-01 | 7.47E+01 |  |
| 8153828 | NM_003923    | FOXH1         | forkhead box H1                      | 0.040  | 1.028 | 7.97E-01 | 7.97E+01 |  |
| 8153835 | NM_032902    | PPP1R16A      | protein phosphatase 1, regulatory    | -0.062 | 0.958 | 6.27E-01 | 6.27E+01 |  |
| 8153838 | NM_004260    | RECQL4        | RecQ protein-like 4                  | -0.032 | 0.978 | 7.78E-01 | 7.78E+01 |  |
| 8153862 | NM_00102467  | LRRC24        | leucine rich repeat containing 24    | -0.053 | 0.964 | 5.87E-01 | 5.87E+01 |  |
| 8153868 | BC073936     | C8orf82       | chromosome 8 open reading fram       | -0.080 | 0.946 | 3.06E-01 | 3.06E+01 |  |
| 8153876 | NM_025251    | KIAA1688      | KIAA1688 protein                     | -0.006 | 0.996 | 9.72E-01 | 9.72E+01 |  |
| 8153890 | NM_138367    | ZNF251        | zinc finger protein 251              | 0.004  | 1.003 | 9.85E-01 | 9.85E+01 |  |
| 8153903 | NM_000973    | RPL8          | ribosomal protein L8                 | -0.011 | 0.993 | 9.66E-01 | 9.66E+01 |  |
| 8153911 | NM_014066    | COMMMD5       | COMM domain containing 5             | -0.059 | 0.960 | 4.04E-01 | 4.04E+01 |  |
| 8153920 | NM_021061    | ZNF250        | zinc finger protein 250              | -0.045 | 0.970 | 7.73E-01 | 7.73E+01 |  |
| 8153937 | NM_031309    | SCRT1         | scratch homolog 1, zinc finger pro   | -0.003 | 0.998 | 9.88E-01 | 9.88E+01 |  |
| 8153939 | NM_012079    | DGAT1         | diacylglycerol O-acyltransferase h   | -0.017 | 0.988 | 9.24E-01 | 9.24E+01 |  |
| 8153959 | NM_203447    | DOCK8         | dedicator of cytokinesis 8           | 0.061  | 1.043 | 6.47E-01 | 6.47E+01 |  |
| 8154059 | NM_003070    | SMARCA2       | SWI/SNF related, matrix associate    | -0.032 | 0.978 | 8.03E-01 | 8.03E+01 |  |
| 8154100 | NM_003383    | VLDLR         | very low density lipoprotein recep   | -0.141 | 0.907 | 2.74E-01 | 2.74E+01 |  |
| 8154128 | DQ246450     | DSERG1        | Down syndrome encephalopathy 1       | 0.036  | 1.025 | 9.23E-01 | 9.23E+01 |  |
| 8154130 | ---          | ---           | ---                                  | 0.034  | 1.024 | 9.05E-01 | 9.05E+01 |  |
| 8154151 | NM_203453    | PPAPDC2       | phosphatidic acid phosphatase typ    | 0.090  | 1.065 | 5.09E-01 | 5.09E+01 |  |
| 8154153 | NM_017913    | CDC37L1       | cell division cycle 37 homolog (S. c | -0.028 | 0.981 | 8.78E-01 | 8.78E+01 |  |
| 8154163 | NM_005772    | RCL1          | RNA terminal phosphate cyclase-li    | -0.070 | 0.952 | 6.80E-01 | 6.80E+01 |  |
| 8154211 | ---          | ---           | ---                                  | 0.499  | 1.414 | 2.45E-01 | 2.45E+01 |  |
| 8154254 | NM_020829    | KIAA1432      | KIAA1432                             | 0.195  | 1.145 | 9.17E-02 | 9.17E+00 |  |
| 8154285 | NM_005511    | MLANA         | melan-A                              | 0.074  | 1.052 | 7.09E-01 | 7.09E+01 |  |
| 8154305 | NM_016275    | SELT          | selenoprotein T                      | 0.092  | 1.066 | 4.82E-01 | 4.82E+01 |  |
| 8154316 | NM_152896    | UHRF2         | ubiquitin-like with PHD and ring fi  | 0.029  | 1.020 | 8.69E-01 | 8.69E+01 |  |
| 8154333 | NM_015061    | KDM4C         | lysine (K)-specific demethylase 4C   | 0.025  | 1.018 | 8.80E-01 | 8.80E+01 |  |
| 8154357 | ---          | ---           | ---                                  | 0.006  | 1.004 | 9.66E-01 | 9.66E+01 |  |
| 8154359 | AY779046     | RPL18A        | ribosomal protein L18a               | -0.010 | 0.993 | 9.63E-01 | 9.63E+01 |  |
| 8154363 | NM_001029    | RPS26         | ribosomal protein S26                | 0.039  | 1.027 | 9.35E-01 | 9.35E+01 |  |
| 8154388 | ---          | ---           | ---                                  | 0.024  | 1.017 | 8.76E-01 | 8.76E+01 |  |
| 8154392 | ---          | ---           | ---                                  | 0.002  | 1.001 | 9.96E-01 | 9.96E+01 |  |
| 8154394 | NM_00103969  | SNAPC3        | small nuclear RNA activating comp    | 0.060  | 1.042 | 6.21E-01 | 6.21E+01 |  |
| 8154476 | NM_003026    | SH3GL2        | SH3-domain GRB2-like 2               | -0.057 | 0.962 | 6.43E-01 | 6.43E+01 |  |
| 8154512 | NM_00104027  | ADAMTS1       | ADAMTS-like 1                        | -0.137 | 0.910 | 6.23E-02 | 6.23E+00 |  |
| 8154523 | NM_006570    | RRAGA         | Ras-related GTP binding A            | 0.004  | 1.002 | 9.88E-01 | 9.88E+01 |  |
| 8154527 | ---          | ---           | ---                                  | 0.100  | 1.071 | 4.94E-01 | 4.94E+01 |  |
| 8154531 | NM_017925    | DENND4C       | DENN/MADD domain containing 4        | 0.035  | 1.025 | 8.66E-01 | 8.66E+01 |  |
| 8154572 | ---          | ---           | ---                                  | -0.410 | 0.753 | 2.15E-01 | 2.15E+01 |  |
| 8154574 | NM_017794    | KIAA1797      | KIAA1797                             | 0.054  | 1.038 | 7.50E-01 | 7.50E+01 |  |
| 8154620 | ---          | ---           | ---                                  | -0.117 | 0.922 | 3.18E-01 | 3.18E+01 |  |
| 8154635 | NM_002451    | MTAP          | methylthioadenosine phosphoryla      | 0.012  | 1.009 | 9.60E-01 | 9.60E+01 |  |
| 8154654 | NR_024274    | C9orf53       | chromosome 9 open reading fram       | 0.064  | 1.046 | 6.42E-01 | 6.42E+01 |  |
| 8154725 | NM_000224    | KRT18         | keratin 18                           | -0.031 | 0.979 | 9.53E-01 | 9.53E+01 |  |
| 8154727 | AF091236     | LOC138412     | solute carrier family 25 (mitochon   | -0.006 | 0.996 | 9.80E-01 | 9.80E+01 |  |
| 8154733 | NM_002197    | ACO1          | aconitase 1, soluble                 | -0.108 | 0.928 | 4.04E-01 | 4.04E+01 |  |
| 8154760 | NM_212558    | TMEM215       | transmembrane protein 215            | 0.006  | 1.004 | 9.73E-01 | 9.73E+01 |  |
| 8154763 | ---          | ---           | ---                                  | -0.039 | 0.973 | 9.19E-01 | 9.19E+01 |  |
| 8154765 | NM_001539    | DNAJA1        | DnaJ (Hsp40) homolog, subfamily      | -0.001 | 0.999 | 9.95E-01 | 9.95E+01 |  |
| 8154785 | NM_016410    | CHMP5         | chromatin modifying protein 5        | 0.167  | 1.122 | 3.06E-01 | 3.06E+01 |  |
| 8154793 | NM_002504    | NFX1          | nuclear transcription factor, X-box  | 0.047  | 1.033 | 7.58E-01 | 7.58E+01 |  |
| 8154836 | NR_003573    | // ANXA2P2 // | annexin A2 pseudogene 2 // anne      | 0.198  | 1.147 | 3.04E-01 | 3.04E+01 |  |
| 8154838 | ENST00000331 | TRBV21OR9-2   | T cell receptor beta variable 21/O   | -0.016 | 0.989 | 9.47E-01 | 9.47E+01 |  |
| 8154841 | ENST00000390 | TRBV23OR9-2   | T cell receptor beta variable 23/O   | -0.091 | 0.939 | 6.51E-01 | 6.51E+01 |  |
| 8154848 | NM_007343    | PRSS3         | protease, serine, 3                  | -0.065 | 0.956 | 4.71E-01 | 4.71E+01 |  |
| 8154856 | NM_017811    | UBE2R2        | ubiquitin-conjugating enzyme E2R     | -0.016 | 0.989 | 9.53E-01 | 9.53E+01 |  |
| 8154866 | ---          | ---           | ---                                  | 0.110  | 1.079 | 7.03E-01 | 7.03E+01 |  |
| 8154868 | ---          | ---           | ---                                  | 0.037  | 1.026 | 9.24E-01 | 9.24E+01 |  |
| 8154870 | ---          | ---           | ---                                  | -0.122 | 0.919 | 3.38E-01 | 3.38E+01 |  |
| 8154872 | NM_016525    | UBAP1         | ubiquitin associated protein 1       | -0.097 | 0.935 | 2.92E-01 | 2.92E+01 |  |
| 8154885 | NM_001161    | NUDT2         | nudix (nucleoside diphosphate lin    | -0.044 | 0.970 | 8.33E-01 | 8.33E+01 |  |
| 8154916 | NM_000155    | GALT          | galactose-1-phosphate uridylyltra    | 0.000  | 1.000 | 1.00E+00 | 1.00E+02 |  |
| 8154934 | NM_147162    | IL11RA        | interleukin 11 receptor, alpha       | 0.051  | 1.036 | 6.81E-01 | 6.81E+01 |  |
| 8154962 | NM_00113500  | DNAJB5        | DnaJ (Hsp40) homolog, subfamily      | -0.053 | 0.964 | 6.60E-01 | 6.60E+01 |  |
| 8154973 | NM_203299    | C9orf131      | chromosome 9 open reading fram       | -0.104 | 0.930 | 2.96E-01 | 2.96E+01 |  |
| 8155048 | NM_014806    | RUSC2         | RUN and SH3 domain containing 2      | -0.093 | 0.938 | 2.61E-01 | 2.61E+01 |  |
| 8155062 | NM_006285    | TESK1         | testis-specific kinase 1             | 0.095  | 1.068 | 4.19E-01 | 4.19E+01 |  |
| 8155073 | NM_174923    | CCDC107       | coiled-coil domain containing 107    | -0.010 | 0.993 | 9.53E-01 | 9.53E+01 |  |
| 8155083 | NM_001216    | CA9           | carbonic anhydrase IX                | -0.085 | 0.943 | 3.69E-01 | 3.69E+01 |  |
| 8155096 | NM_006368    | CREB3         | cAMP responsive element binding      | -0.141 | 0.907 | 1.20E-01 | 1.20E+01 |  |
| 8155110 | NM_00108049  | RGP1          | RGP1 retrograde golgi transport h    | -0.068 | 0.954 | 6.16E-01 | 6.16E+01 |  |
| 8155121 | NM_003995    | NPR2          | natriuretic peptide receptor B/gua   | -0.054 | 0.963 | 7.14E-01 | 7.14E+01 |  |
| 8155148 | NM_016446    | TMEM8B        | transmembrane protein 8B             | -0.066 | 0.955 | 4.42E-01 | 4.42E+01 |  |
| 8155167 | NM_00103979  | HRCT1         | histidine rich carboxyl terminus 1   | -0.004 | 0.997 | 9.80E-01 | 9.80E+01 |  |
| 8155169 | NM_021111    | RECK          | reversion-inducing-cysteine-rich p   | -0.019 | 0.987 | 9.35E-01 | 9.35E+01 |  |
| 8155203 | NM_007096    | CLTA          | clathrin, light chain (Lca)          | 0.242  | 1.182 | 3.50E-02 | 3.50E+00 |  |

|         |              |                |                                     |        |       |          |          |  |  |
|---------|--------------|----------------|-------------------------------------|--------|-------|----------|----------|--|--|
| 8155234 | NM_032226    | ZCCHC7         | zinc finger, CCHC domain containi   | 0.134  | 1.098 | 1.57E-01 | 1.57E+01 |  |  |
| 8155246 | ---          | ---            | ---                                 | 0.157  | 1.115 | 6.16E-01 | 6.16E+01 |  |  |
| 8155248 | ---          | ---            | ---                                 | 0.412  | 1.331 | 3.81E-01 | 3.81E+01 |  |  |
| 8155250 | NM_012203    | GRHPR          | glyoxylate reductase/hydroxyppyru   | 0.000  | 1.000 | 1.00E+00 | 1.00E+02 |  |  |
| 8155268 | NM_022490    | POLR1E         | polymerase (RNA) I polypeptide E    | -0.122 | 0.919 | 5.20E-01 | 5.20E+01 |  |  |
| 8155301 | NM_144964    | RG9MTD3        | RNA (guanine-9-) methyltransfera    | 0.041  | 1.029 | 7.73E-01 | 7.73E+01 |  |  |
| 8155312 | NM_024345    | DCAF10         | DDB1 and CUL4 associated factor     | 0.027  | 1.019 | 8.69E-01 | 8.69E+01 |  |  |
| 8155327 | NM_000692    | ALDH1B1        | aldehyde dehydrogenase 1 family,    | 0.026  | 1.018 | 9.23E-01 | 9.23E+01 |  |  |
| 8155332 | NM_00103716  | C7orf70        | chromosome 7 open reading fram      | -0.153 | 0.899 | 2.34E-01 | 2.34E+01 |  |  |
| 8155340 | NM_015667    | //75A7 // FAM7 | family with sequence similarity 75  | -0.022 | 0.985 | 8.55E-01 | 8.55E+01 |  |  |
| 8155345 | NR_026801    | FAM74A3        | family with sequence similarity 74  | -0.005 | 0.997 | 9.83E-01 | 9.83E+01 |  |  |
| 8155349 | NM_015667    | //75A7 // FAM7 | family with sequence similarity 75  | -0.009 | 0.994 | 9.56E-01 | 9.56E+01 |  |  |
| 8155371 | NM_015667    | //75A7 // FAM7 | family with sequence similarity 75  | -0.004 | 0.998 | 9.82E-01 | 9.82E+01 |  |  |
| 8155383 | NM_015667    | //75A7 // FAM7 | family with sequence similarity 75  | -0.010 | 0.993 | 9.47E-01 | 9.47E+01 |  |  |
| 8155393 | AK292642     | LOC554249      | hypothetical LOC554249              | -0.033 | 0.977 | 8.62E-01 | 8.62E+01 |  |  |
| 8155422 | NM_201453    | CBWD3          | COBW domain containing 3            | 0.140  | 1.102 | 2.02E-01 | 2.02E+01 |  |  |
| 8155440 | NM_00109927  | FOXDL2         | forkhead box D4-like 2              | -0.091 | 0.939 | 1.50E-01 | 1.50E+01 |  |  |
| 8155442 | NR_002817    | AQP7P1         | aquaporin 7 pseudogene 1            | -0.040 | 0.973 | 7.04E-01 | 7.04E+01 |  |  |
| 8155453 | ---          | ---            | ---                                 | 0.090  | 1.064 | 8.00E-01 | 8.00E+01 |  |  |
| 8155455 | AK126863     | LOC441426      | hypothetical gene supported by A    | -0.062 | 0.958 | 7.98E-01 | 7.98E+01 |  |  |
| 8155458 | D14041       | RBPJ           | recombination signal binding prot   | -0.020 | 0.987 | 9.43E-01 | 9.43E+01 |  |  |
| 8155490 | NR_003670    | KGFLP2         | keratinocyte growth factor-like pr  | -0.047 | 0.968 | 6.95E-01 | 6.95E+01 |  |  |
| 8155497 | NR_027421    | FAM27C         | family with sequence similarity 27  | 0.003  | 1.002 | 9.90E-01 | 9.90E+01 |  |  |
| 8155501 | ---          | ---            | ---                                 | -0.022 | 0.985 | 8.62E-01 | 8.62E+01 |  |  |
| 8155510 | NR_024060    | FAM27A         | family with sequence similarity 27  | 0.015  | 1.010 | 9.51E-01 | 9.51E+01 |  |  |
| 8155514 | BC032035     | FAM27E3        | family with sequence similarity 27  | -0.108 | 0.928 | 3.06E-01 | 3.06E+01 |  |  |
| 8155521 | NR_024060    | FAM27A         | family with sequence similarity 27  | -0.080 | 0.946 | 7.10E-01 | 7.10E+01 |  |  |
| 8155537 | ---          | ---            | ---                                 | -0.024 | 0.984 | 8.57E-01 | 8.57E+01 |  |  |
| 8155547 | NR_024496    | LOC442421      | hypothetical LOC442421              | -0.089 | 0.940 | 2.72E-01 | 2.72E+01 |  |  |
| 8155550 | AK292642     | LOC554249      | hypothetical LOC554249              | -0.040 | 0.973 | 8.01E-01 | 8.01E+01 |  |  |
| 8155554 | NR_002817    | AQP7P1         | aquaporin 7 pseudogene 1            | -0.001 | 0.999 | 9.93E-01 | 9.93E+01 |  |  |
| 8155563 | ENST00000367 | MTHFD1L        | methylenetetrahydrofolate dehyd     | -0.130 | 0.914 | 5.89E-01 | 5.89E+01 |  |  |
| 8155569 | BC119675     | FAM27E3        | family with sequence similarity 27  | -0.067 | 0.954 | 5.20E-01 | 5.20E+01 |  |  |
| 8155572 | NR_024060    | FAM27A         | family with sequence similarity 27  | 0.014  | 1.010 | 9.53E-01 | 9.53E+01 |  |  |
| 8155598 | ---          | ---            | ---                                 | 0.040  | 1.028 | 8.71E-01 | 8.71E+01 |  |  |
| 8155600 | ---          | ---            | ---                                 | 0.040  | 1.028 | 8.71E-01 | 8.71E+01 |  |  |
| 8155630 | ENST00000367 | MTHFD1L        | methylenetetrahydrofolate dehyd     | -0.080 | 0.946 | 6.83E-01 | 6.83E+01 |  |  |
| 8155636 | NM_201453    | CBWD3          | COBW domain containing 3            | 0.106  | 1.077 | 2.91E-01 | 2.91E+01 |  |  |
| 8155661 | NM_199135    | FOXDL3         | forkhead box D4-like 3              | -0.082 | 0.945 | 3.05E-01 | 3.05E+01 |  |  |
| 8155696 | NM_138333    | FAM122A        | family with sequence similarity 12  | 0.090  | 1.065 | 3.35E-01 | 3.35E+01 |  |  |
| 8155699 | NM_000144    | FXN            | frataxin                            | -0.001 | 0.999 | 9.99E-01 | 9.99E+01 |  |  |
| 8155707 | NM_004817    | TJP2           | tight junction protein 2 (zona occl | 0.034  | 1.024 | 9.17E-01 | 9.17E+01 |  |  |
| 8155770 | NM_015110    | SMC5           | structural maintenance of chromo    | -0.069 | 0.953 | 4.49E-01 | 4.49E+01 |  |  |
| 8155849 | NM_000700    | ANXA1          | annexin A1                          | -0.186 | 0.879 | 1.42E-01 | 1.42E+01 |  |  |
| 8155883 | NM_012383    | OSTF1          | osteoclast stimulating factor 1     | 0.027  | 1.019 | 9.09E-01 | 9.09E+01 |  |  |
| 8155898 | NM_006200    | PCSK5          | proprotein convertase subtilisin/k  | 0.082  | 1.058 | 4.84E-01 | 4.84E+01 |  |  |
| 8155942 | NM_00101373  | FOXB2          | forkhead box B2                     | -0.018 | 0.987 | 8.58E-01 | 8.58E+01 |  |  |
| 8155946 | NM_033305    | VPS13A         | vacuolar protein sorting 13 homol   | -0.077 | 0.948 | 5.55E-01 | 5.55E+01 |  |  |
| 8156026 | NM_00109880  | CEP78          | centrosomal protein 78kDa           | 0.174  | 1.128 | 3.70E-01 | 3.70E+01 |  |  |
| 8156043 | NM_058179    | PSAT1          | phosphoserine aminotransferase 1    | -0.039 | 0.973 | 8.84E-01 | 8.84E+01 |  |  |
| 8156060 | NM_007005    | TLE4           | transducin-like enhancer of split 4 | 0.084  | 1.060 | 5.98E-01 | 5.98E+01 |  |  |
| 8156088 | ---          | ---            | ---                                 | -0.039 | 0.973 | 8.64E-01 | 8.64E+01 |  |  |
| 8156112 | ---          | ---            | ---                                 | 0.015  | 1.011 | 9.61E-01 | 9.61E+01 |  |  |
| 8156116 | NM_00100155  | C9orf103       | chromosome 9 open reading fram      | 0.097  | 1.069 | 4.05E-01 | 4.05E+01 |  |  |
| 8156160 | NM_017576    | KIF27          | kinesin family member 27            | -0.098 | 0.934 | 6.62E-01 | 6.62E+01 |  |  |
| 8156164 | NM_017576    | KIF27          | kinesin family member 27            | -0.109 | 0.927 | 7.95E-01 | 7.95E+01 |  |  |
| 8156167 | NM_024635    | MAK10          | MAK10 homolog, amino-acid N-ac      | -0.003 | 0.998 | 9.89E-01 | 9.89E+01 |  |  |
| 8156196 | NM_00100170  | C9orf170       | chromosome 9 open reading fram      | -0.043 | 0.971 | 7.52E-01 | 7.52E+01 |  |  |
| 8156199 | NM_004938    | DAPK1          | death-associated protein kinase 1   | 0.519  | 1.433 | 8.98E-02 | 8.98E+00 |  |  |
| 8156228 | NM_001912    | CTSL1          | cathepsin L1                        | -0.009 | 0.994 | 9.84E-01 | 9.84E+01 |  |  |
| 8156247 | NM_178828    | C9orf79        | chromosome 9 open reading fram      | 0.018  | 1.012 | 9.16E-01 | 9.16E+01 |  |  |
| 8156257 | NM_00114512  | //75C1 // FAM7 | family with sequence similarity 75  | -0.027 | 0.981 | 7.97E-01 | 7.97E+01 |  |  |
| 8156263 | NM_006717    | SPIN1          | spindlin 1                          | -0.030 | 0.979 | 8.72E-01 | 8.72E+01 |  |  |
| 8156290 | NM_001827    | CKS2           | CDC28 protein kinase regulatory s   | -0.016 | 0.989 | 9.76E-01 | 9.76E+01 |  |  |
| 8156295 | NM_024077    | SECISBP2       | SECIS binding protein 2             | -0.031 | 0.979 | 7.91E-01 | 7.91E+01 |  |  |
| 8156309 | NM_006705    | GADD45G        | growth arrest and DNA-damage-in     | -0.097 | 0.935 | 2.65E-01 | 2.65E+01 |  |  |
| 8156319 | NR_002822    | MGC72080       | MGC72080 pseudogene                 | -0.071 | 0.952 | 7.07E-01 | 7.07E+01 |  |  |
| 8156358 | ---          | ---            | ---                                 | 0.228  | 1.171 | 6.66E-01 | 6.66E+01 |  |  |
| 8156373 | NM_00108353  | FGD3           | FYVE, RhoGEF and PH domain con      | -0.107 | 0.928 | 1.11E-01 | 1.11E+01 |  |  |
| 8156393 | NM_145006    | SUSD3          | sushi domain containing 3           | -0.061 | 0.959 | 6.73E-01 | 6.73E+01 |  |  |
| 8156404 | NM_032310    | C9orf89        | chromosome 9 open reading fram      | -0.141 | 0.907 | 6.79E-02 | 6.79E+00 |  |  |
| 8156415 | NM_006648    | WNK2           | WNK lysine deficient protein kinas  | -0.086 | 0.942 | 2.44E-01 | 2.44E+01 |  |  |
| 8156452 | NM_014612    | FAM120A        | family with sequence similarity 12  | 0.113  | 1.082 | 1.49E-01 | 1.49E+01 |  |  |
| 8156476 | NM_005392    | PHF2           | PHD finger protein 2                | -0.066 | 0.955 | 4.05E-01 | 4.05E+01 |  |  |
| 8156506 | NM_152422    | PTPDC1         | protein tyrosine phosphatase dom    | 0.034  | 1.024 | 7.87E-01 | 7.87E+01 |  |  |
| 8156519 | ---          | ---            | ---                                 | 0.150  | 1.110 | 2.31E-01 | 2.31E+01 |  |  |
| 8156523 | ---          | ---            | ---                                 | 0.115  | 1.083 | 2.84E-01 | 2.84E+01 |  |  |

|         |             |             |                                                     |        |       |          |          |
|---------|-------------|-------------|-----------------------------------------------------|--------|-------|----------|----------|
| 8156529 | NM_194320   | ZNF169      | zinc finger protein 169                             | 0.009  | 1.006 | 9.72E-01 | 9.72E+01 |
| 8156538 | NM_032558   | HIATL1      | hippocampus abundant transcript                     | 0.087  | 1.062 | 7.57E-01 | 7.57E+01 |
| 8156549 | NM_032823   | C9orf3      | chromosome 9 open reading frame                     | 0.027  | 1.019 | 8.78E-01 | 8.78E+01 |
| 8156569 | ---         | ---         | ---                                                 | -0.051 | 0.965 | 7.03E-01 | 7.03E+01 |
| 8156575 | NM_015251   | ATMIN       | ATM interactor                                      | -0.029 | 0.980 | 9.04E-01 | 9.04E+01 |
| 8156577 | ---         | ---         | ---                                                 | -0.099 | 0.933 | 4.32E-01 | 4.32E+01 |
| 8156579 | ---         | ---         | ---                                                 | 0.269  | 1.205 | 4.88E-01 | 4.88E+01 |
| 8156581 | NM_00101089 | C9orf102    | chromosome 9 open reading frame                     | 0.084  | 1.060 | 4.84E-01 | 4.84E+01 |
| 8156599 | ---         | ---         | ---                                                 | 0.013  | 1.009 | 9.66E-01 | 9.66E+01 |
| 8156601 | AL133663    | C9orf102    | chromosome 9 open reading frame                     | 0.050  | 1.035 | 8.41E-01 | 8.41E+01 |
| 8156604 | BC022957    | C9orf102    | chromosome 9 open reading frame                     | 0.030  | 1.021 | 8.52E-01 | 8.52E+01 |
| 8156610 | NM_014282   | HABP4       | hyaluronan binding protein 4                        | -0.035 | 0.976 | 8.84E-01 | 8.84E+01 |
| 8156620 | NM_017561   | FAM22F      | family with sequence similarity 22                  | -0.025 | 0.983 | 8.17E-01 | 8.17E+01 |
| 8156633 | BC144521    | KIAA1529    | KIAA1529                                            | -0.014 | 0.990 | 9.36E-01 | 9.36E+01 |
| 8156688 | NM_014290   | TDRD7       | tudor domain containing 7                           | 0.094  | 1.067 | 7.58E-01 | 7.58E+01 |
| 8156706 | NM_003275   | TMOD1       | tropomodulin 1                                      | -0.220 | 0.859 | 1.08E-01 | 1.08E+01 |
| 8156718 | NM_002486   | NCBP1       | nuclear cap binding protein subunit                 | -0.007 | 0.995 | 9.65E-01 | 9.65E+01 |
| 8156748 | ---         | ---         | ---                                                 | -0.019 | 0.987 | 9.57E-01 | 9.57E+01 |
| 8156750 | NM_006401   | ANP32B      | acidic (leucine-rich) nuclear phosphoprotein        | -0.017 | 0.988 | 9.03E-01 | 9.03E+01 |
| 8156759 | ---         | ---         | ---                                                 | 0.099  | 1.071 | 8.78E-01 | 8.78E+01 |
| 8156761 | NM_018946   | NANS        | N-acetylneuraminic acid synthase                    | 0.271  | 1.207 | 2.64E-02 | 2.64E+00 |
| 8156770 | NM_024642   | GALNT12     | UDP-N-acetyl-alpha-D-galactosamine 4-epimerase      | 0.013  | 1.009 | 9.61E-01 | 9.61E+01 |
| 8156826 | NM_004612   | TGFB1       | transforming growth factor, beta 1                  | 0.207  | 1.154 | 5.15E-02 | 5.15E+00 |
| 8156838 | NM_006808   | SEC61B      | Sec61 beta subunit                                  | 0.045  | 1.031 | 7.46E-01 | 7.46E+01 |
| 8156846 | ---         | ---         | ---                                                 | 0.028  | 1.020 | 8.13E-01 | 8.13E+01 |
| 8156861 | NM_017919   | STX17       | syntaxin 17                                         | 0.138  | 1.100 | 3.56E-01 | 3.56E+01 |
| 8156873 | NM_014425   | INVS        | inversin                                            | -0.013 | 0.991 | 9.49E-01 | 9.49E+01 |
| 8156895 | ---         | ---         | ---                                                 | 0.093  | 1.066 | 8.84E-01 | 8.84E+01 |
| 8156919 | NM_00101811 | MURC        | muscle-related coiled-coil protein                  | -0.132 | 0.913 | 4.26E-01 | 4.26E+01 |
| 8156923 | NM_007299   | RP11-35N6.1 | plasticity related gene 3                           | -0.046 | 0.968 | 7.05E-01 | 7.05E+01 |
| 8156935 | NM_003452   | ZNF189      | zinc finger protein 189                             | 0.048  | 1.034 | 7.89E-01 | 7.89E+01 |
| 8156945 | NM_019592   | RNF20       | ring finger protein 20                              | 0.091  | 1.065 | 3.51E-01 | 3.51E+01 |
| 8156982 | NM_00104255 | SMC2        | structural maintenance of chromosome 2              | 0.052  | 1.037 | 8.57E-01 | 8.57E+01 |
| 8157021 | NM_015469   | NIPSNAP3A   | nipsnap homolog 3A (C. elegans)                     | 0.172  | 1.127 | 4.27E-01 | 4.27E+01 |
| 8157038 | NM_080546   | SLC44A1     | solute carrier family 44, member 1                  | 0.043  | 1.031 | 9.36E-01 | 9.36E+01 |
| 8157074 | NM_00107980 | FKTN        | fukutin                                             | 0.083  | 1.059 | 6.99E-01 | 6.99E+01 |
| 8157092 | NM_018112   | TMEM38B     | transmembrane protein 38B                           | -0.015 | 0.990 | 9.77E-01 | 9.77E+01 |
| 8157101 | ---         | ---         | ---                                                 | 0.015  | 1.011 | 9.65E-01 | 9.65E+01 |
| 8157125 | NM_002874   | RAD23B      | RAD23 homolog B (S. cerevisiae)                     | 0.051  | 1.036 | 7.20E-01 | 7.20E+01 |
| 8157139 | ---         | ---         | ---                                                 | -0.016 | 0.989 | 9.47E-01 | 9.47E+01 |
| 8157153 | NM_007203   | PALM2-AKAP2 | PALM2-AKAP2 readthrough transcript                  | -0.060 | 0.959 | 6.38E-01 | 6.38E+01 |
| 8157203 | NM_00101588 | DNAJC25     | DnaJ (Hsp40) homolog, subfamily 25                  | 0.012  | 1.009 | 9.50E-01 | 9.50E+01 |
| 8157214 | ---         | ---         | ---                                                 | 0.169  | 1.125 | 1.90E-01 | 1.90E+01 |
| 8157216 | NM_003358   | UGCG        | UDP-glucose ceramide glucosyltransferase            | 0.010  | 1.007 | 9.80E-01 | 9.80E+01 |
| 8157231 | ---         | ---         | ---                                                 | 0.053  | 1.037 | 8.68E-01 | 8.68E+01 |
| 8157246 | BC105048    | KIAA1958    | KIAA1958                                            | 0.036  | 1.025 | 8.05E-01 | 8.05E+01 |
| 8157253 | NM_00101299 | SNX30       | sorting nexin family member 30                      | 0.232  | 1.175 | 2.98E-01 | 2.98E+01 |
| 8157264 | NM_001860   | SLC31A2     | solute carrier family 31 (copper transporter)       | 0.396  | 1.316 | 9.03E-02 | 9.03E+00 |
| 8157283 | NM_004697   | PRPF4       | PRP4 pre-mRNA processing factor                     | 0.072  | 1.051 | 5.56E-01 | 5.56E+01 |
| 8157300 | NM_017688   | BSPRY       | B-box and SPRY domain containing                    | 0.104  | 1.075 | 1.53E-01 | 1.53E+01 |
| 8157324 | NM_144488   | RGS3        | regulator of G-protein signaling 3                  | 0.038  | 1.027 | 6.42E-01 | 6.42E+01 |
| 8157362 | NM_133374   | ZNF618      | zinc finger protein 618                             | -0.095 | 0.936 | 4.37E-01 | 4.37E+01 |
| 8157383 | NM_032888   | COL27A1     | collagen, type XXVII, alpha 1                       | -0.057 | 0.961 | 4.97E-01 | 4.97E+01 |
| 8157454 | NM_004888   | ATP6V1G1    | ATPase, H+ transporting, lysosomal                  | 0.243  | 1.183 | 5.65E-04 | 5.65E-02 |
| 8157463 | NM_153045   | C9orf91     | chromosome 9 open reading frame                     | 0.202  | 1.150 | 1.07E-02 | 1.07E+00 |
| 8157516 | NM_012210   | TRIM32      | tripartite motif-containing 32                      | 0.039  | 1.027 | 7.89E-01 | 7.89E+01 |
| 8157534 | NM_007018   | CEP110      | centrosomal protein 110kDa                          | 0.053  | 1.038 | 5.91E-01 | 5.91E+01 |
| 8157582 | NM_000177   | GSN         | gelsolin (amyloidosis, Finnish type)                | 0.229  | 1.172 | 1.62E-02 | 1.62E+00 |
| 8157605 | NM_004099   | STOM        | stomatin                                            | 0.299  | 1.230 | 3.72E-01 | 3.72E+01 |
| 8157610 | NM_032552   | DAB2IP      | DAB2 interacting protein                            | 0.001  | 1.001 | 9.92E-01 | 9.92E+01 |
| 8157638 | NM_138777   | MRRF        | mitochondrial ribosome recycling                    | 0.058  | 1.041 | 7.91E-01 | 7.91E+01 |
| 8157650 | NM_000962   | PTGS1       | prostaglandin-endoperoxide synthase                 | 0.246  | 1.186 | 2.17E-02 | 2.17E+00 |
| 8157691 | NM_182620   | SKA2        | spindle and kinetochore associate                   | 0.075  | 1.053 | 6.63E-01 | 6.63E+01 |
| 8157696 | NM_00100192 | OR5C1       | olfactory receptor, family 5, subfamily 1           | -0.005 | 0.997 | 9.83E-01 | 9.83E+01 |
| 8157698 | NM_080859   | OR1K1       | olfactory receptor, family 1, subfamily 1           | 0.041  | 1.029 | 8.06E-01 | 8.06E+01 |
| 8157700 | NM_012197   | RABGAP1     | RAB GTPase activating protein 1                     | 0.013  | 1.009 | 9.39E-01 | 9.39E+01 |
| 8157729 | ---         | ---         | ---                                                 | 0.266  | 1.203 | 2.71E-01 | 2.71E+01 |
| 8157731 | NM_173689   | CRB2        | crumbs homolog 2 (Drosophila)                       | -0.079 | 0.947 | 3.38E-01 | 3.38E+01 |
| 8157777 | NM_00116180 | GPR144      | G protein-coupled receptor 144                      | -0.007 | 0.995 | 9.61E-01 | 9.61E+01 |
| 8157798 | ---         | ---         | ---                                                 | 0.083  | 1.059 | 4.63E-01 | 4.63E+01 |
| 8157802 | ---         | ---         | ---                                                 | -0.077 | 0.948 | 7.63E-01 | 7.63E+01 |
| 8157804 | NM_182487   | OLFML2A     | olfactomedin-like 2A                                | -0.019 | 0.987 | 9.00E-01 | 9.00E+01 |
| 8157818 | NM_00104547 | WDR38       | WD repeat domain 38                                 | -0.072 | 0.951 | 5.76E-01 | 5.76E+01 |
| 8157828 | NM_030978   | ARPC5L      | actin related protein 2/3 complex, subfamily 5L     | -0.051 | 0.965 | 7.64E-01 | 7.64E+01 |
| 8157843 | NM_005833   | RABEPK      | Rab9 effector protein with kelch domain             | 0.033  | 1.023 | 8.78E-01 | 8.78E+01 |
| 8157858 | NM_015635   | GAPVD1      | GTPase activating protein and VPS domain containing | 0.072  | 1.051 | 6.24E-01 | 6.24E+01 |
| 8157890 | NM_006195   | PBX3        | pre-B-cell leukemia homeobox 3                      | 0.115  | 1.083 | 1.91E-01 | 1.91E+01 |



|         |             |              |                                       |        |       |          |          |  |
|---------|-------------|--------------|---------------------------------------|--------|-------|----------|----------|--|
| 8157905 | NM_033446   | FAM125B      | family with sequence similarity 12    | -0.159 | 0.896 | 2.04E-01 | 2.04E+01 |  |
| 8157922 | NM_002316   | LMX1B        | LIM homeobox transcription facto      | -0.023 | 0.984 | 8.69E-01 | 8.69E+01 |  |
| 8157933 | NM_014007   | ZBTB43       | zinc finger and BTB domain contai     | 0.027  | 1.019 | 8.91E-01 | 8.91E+01 |  |
| 8157939 | ---         | ---          | ---                                   | -0.142 | 0.906 | 2.72E-01 | 2.72E+01 |  |
| 8157941 | NM_00109927 | ZBTB34       | zinc finger and BTB domain contai     | 0.148  | 1.108 | 2.63E-01 | 2.63E+01 |  |
| 8157945 | NM_00109927 | ZBTB34       | zinc finger and BTB domain contai     | 0.083  | 1.060 | 7.40E-01 | 7.40E+01 |  |
| 8157947 | NM_00109927 | ZBTB34       | zinc finger and BTB domain contai     | 0.206  | 1.154 | 2.49E-01 | 2.49E+01 |  |
| 8157949 | NM_014636   | RALGPS1      | Ral GEF with PH domain and SH3 b      | -0.008 | 0.994 | 9.60E-01 | 9.60E+01 |  |
| 8157976 | NM_032293   | GARNL3       | GTPase activating Rap/RanGAP do       | 0.067  | 1.047 | 5.91E-01 | 5.91E+01 |  |
| 8158009 | NM_014580   | SLC2A8       | solute carrier family 2 (facilitated  | -0.032 | 0.978 | 7.57E-01 | 7.57E+01 |  |
| 8158022 | NM_007135   | ZNF79        | zinc finger protein 79                | -0.080 | 0.946 | 4.70E-01 | 4.70E+01 |  |
| 8158028 | NM_138361   | LRSAM1       | leucine rich repeat and sterile alph  | -0.032 | 0.978 | 7.92E-01 | 7.92E+01 |  |
| 8158059 | NM_003165   | STXBP1       | syntaxin binding protein 1            | 0.051  | 1.036 | 8.11E-01 | 8.11E+01 |  |
| 8158094 | NM_144965   | TTC16        | tetratricopeptide repeat domain 1     | 0.045  | 1.031 | 6.22E-01 | 6.22E+01 |  |
| 8158112 | NM_001261   | CDK9         | cyclin-dependent kinase 9             | -0.043 | 0.971 | 7.71E-01 | 7.71E+01 |  |
| 8158123 | NM_004957   | FPGS         | folypolypglutamate synthase           | -0.003 | 0.998 | 9.85E-01 | 9.85E+01 |  |
| 8158145 | ---         | ---          | ---                                   | -0.023 | 0.984 | 8.31E-01 | 8.31E+01 |  |
| 8158167 | NM_005564   | LCN2         | lipocalin 2                           | -0.123 | 0.918 | 1.50E-01 | 1.50E+01 |  |
| 8158177 | NM_024112   | C9orf16      | chromosome 9 open reading fram        | -0.117 | 0.922 | 3.06E-02 | 3.06E+00 |  |
| 8158183 | NM_004408   | DNM1         | dynamins 1                            | 0.040  | 1.028 | 7.94E-01 | 7.94E+01 |  |
| 8158204 | NM_00104001 | C9orf119     | chromosome 9 open reading fram        | 0.027  | 1.019 | 9.23E-01 | 9.23E+01 |  |
| 8158212 | ---         | ---          | ---                                   | -0.054 | 0.964 | 8.30E-01 | 8.30E+01 |  |
| 8158214 | NM_016035   | COQ4         | coenzyme Q4 homolog (S. cerevisi      | -0.146 | 0.904 | 1.20E-01 | 1.20E+01 |  |
| 8158224 | NM_005094   | SLC27A4      | solute carrier family 27 (fatty acid  | -0.044 | 0.970 | 7.09E-01 | 7.09E+01 |  |
| 8158240 | NM_021109   | TMSB4X       | thymosin beta 4, X-linked             | -0.040 | 0.973 | 6.57E-01 | 6.57E+01 |  |
| 8158242 | NM_030914   | URM1         | ubiquitin related modifier 1 homo     | 0.038  | 1.027 | 8.79E-01 | 8.79E+01 |  |
| 8158250 | NM_016174   | CERCAM       | cerebral endothelial cell adhesion    | -0.031 | 0.979 | 8.41E-01 | 8.41E+01 |  |
| 8158269 | NM_002540   | ODF2         | outer dense fiber of sperm tails 2    | -0.020 | 0.986 | 8.99E-01 | 8.99E+01 |  |
| 8158298 | NM_00100372 | GLE1         | GLE1 RNA export mediator homol        | -0.080 | 0.946 | 3.27E-01 | 3.27E+01 |  |
| 8158317 | NM_00113043 | SPTAN1       | spectrin, alpha, non-erythrocytic 1   | -0.070 | 0.952 | 5.06E-01 | 5.06E+01 |  |
| 8158372 | NM_003011   | SET          | SET nuclear oncogene                  | 0.009  | 1.006 | 9.37E-01 | 9.37E+01 |  |
| 8158380 | NM_013355   | PKN3         | protein kinase N3                     | -0.043 | 0.971 | 7.89E-01 | 7.89E+01 |  |
| 8158404 | ---         | ---          | ---                                   | 0.076  | 1.054 | 8.69E-01 | 8.69E+01 |  |
| 8158406 | NM_018201   | TBC1D13      | TBC1 domain family, member 13         | -0.081 | 0.946 | 6.15E-01 | 6.15E+01 |  |
| 8158418 | NM_004435   | ENDOG        | endonuclease G                        | -0.031 | 0.979 | 7.97E-01 | 7.97E+01 |  |
| 8158424 | NM_00112724 | LRRCA8       | leucine rich repeat containing 8 fa   | -0.069 | 0.953 | 3.01E-01 | 3.01E+01 |  |
| 8158431 | NM_00110087 | PHYHD1       | phytanoyl-CoA dioxygenase doma        | -0.005 | 0.996 | 9.78E-01 | 9.78E+01 |  |
| 8158446 | NM_015354   | NUP188       | nucleoporin 188kDa                    | -0.023 | 0.984 | 8.62E-01 | 8.62E+01 |  |
| 8158492 | BC009114    | FAM73B       | family with sequence similarity 73    | -0.009 | 0.994 | 9.52E-01 | 9.52E+01 |  |
| 8158513 | NM_020438   | DOLPP1       | dolichyl pyrophosphate phosphat       | 0.020  | 1.014 | 9.27E-01 | 9.27E+01 |  |
| 8158523 | NM_178001   | PPP2R4       | protein phosphatase 2A activator,     | 0.112  | 1.081 | 5.16E-01 | 5.16E+01 |  |
| 8158539 | NM_00101271 | C9orf106     | chromosome 9 open reading fram        | 0.042  | 1.029 | 8.69E-01 | 8.69E+01 |  |
| 8158544 | NM_014064   | METTL11A     | methyltransferase like 11A            | 0.032  | 1.022 | 8.40E-01 | 8.40E+01 |  |
| 8158554 | NM_016307   | PRRX2        | paired related homeobox 2             | 0.000  | 1.000 | 1.00E+00 | 1.00E+02 |  |
| 8158560 | NM_014506   | TOR1B        | torin family 1, member B (torin i     | 0.052  | 1.037 | 8.33E-01 | 8.33E+01 |  |
| 8158568 | NM_006676   | USP20        | ubiquitin specific peptidase 20       | -0.041 | 0.972 | 8.14E-01 | 8.14E+01 |  |
| 8158597 | NM_00113655 | GPR107       | G protein-coupled receptor 107        | 0.152  | 1.111 | 1.54E-01 | 1.54E+01 |  |
| 8158625 | AK125285    | LOC100129785 | hypothetical protein LOC1001297       | 0.019  | 1.014 | 9.54E-01 | 9.54E+01 |  |
| 8158627 | NM_014286   | FREQ         | frequency homolog (Drosophila)        | -0.171 | 0.888 | 1.67E-01 | 1.67E+01 |  |
| 8158637 | AL834139    | HMCN2        | hemicentin 2                          | -0.005 | 0.996 | 9.79E-01 | 9.79E+01 |  |
| 8158666 | AK128680    | HMCN2        | hemicentin 2                          | 0.011  | 1.008 | 9.49E-01 | 9.49E+01 |  |
| 8158671 | NM_000050   | ASS1         | argininosuccinate synthetase 1        | -0.061 | 0.959 | 5.56E-01 | 5.56E+01 |  |
| 8158684 | ---         | ---          | ---                                   | 0.078  | 1.055 | 5.55E-01 | 5.55E+01 |  |
| 8158686 | NM_003934   | FUBP3        | far upstream element (FUSE) bind      | -0.056 | 0.962 | 5.04E-01 | 5.04E+01 |  |
| 8158708 | NM_021619   | PRDM12       | PR domain containing 12               | -0.066 | 0.956 | 5.15E-01 | 5.15E+01 |  |
| 8158714 | NM_014285   | EXOSC2       | exosome component 2                   | 0.054  | 1.038 | 8.22E-01 | 8.22E+01 |  |
| 8158725 | NM_005157   | ABL1         | c-abl oncogene 1, receptor tyrosin    | -0.073 | 0.950 | 5.39E-01 | 5.39E+01 |  |
| 8158739 | NM_006059   | LAMC3        | laminin, gamma 3                      | -0.016 | 0.989 | 9.16E-01 | 9.16E+01 |  |
| 8158771 | NM_031426   | AIF1L        | allograft inflammatory factor 1-lik   | -0.034 | 0.977 | 8.05E-01 | 8.05E+01 |  |
| 8158783 | NM_005085   | NUP214       | nucleoporin 214kDa                    | -0.055 | 0.963 | 6.68E-01 | 6.68E+01 |  |
| 8158825 | NM_032728   | PPAPDC3      | phosphatidic acid phosphatase typ     | -0.037 | 0.974 | 7.55E-01 | 7.55E+01 |  |
| 8158829 | NM_013318   | BAT2L        | HLA-B associated transcript 2-like    | -0.088 | 0.941 | 6.39E-01 | 6.39E+01 |  |
| 8158839 | NM_013318   | BAT2L        | HLA-B associated transcript 2-like    | -0.084 | 0.944 | 4.51E-01 | 4.51E+01 |  |
| 8158862 | NR_002914   | SNORD62A     | small nucleolar RNA, C/D box 62A      | -0.137 | 0.909 | 5.89E-01 | 5.89E+01 |  |
| 8158864 | NR_002914   | SNORD62A     | small nucleolar RNA, C/D box 62A      | -0.137 | 0.909 | 5.89E-01 | 5.89E+01 |  |
| 8158866 | NM_00113611 | POMT1        | protein-O-mannosyltransferase 1       | -0.040 | 0.973 | 7.15E-01 | 7.15E+01 |  |
| 8158890 | NM_032536   | NTNG2        | netrin G2                             | 0.034  | 1.024 | 8.08E-01 | 8.08E+01 |  |
| 8158910 | ---         | ---          | ---                                   | -0.044 | 0.970 | 8.59E-01 | 8.59E+01 |  |
| 8158912 | NM_020064   | BARHL1       | BarH-like homeobox 1                  | -0.032 | 0.978 | 8.07E-01 | 8.07E+01 |  |
| 8158918 | NM_012204   | GTF3C4       | general transcription factor IIIC, p  | -0.116 | 0.923 | 3.04E-01 | 3.04E+01 |  |
| 8158930 | NM_018956   | C9orf9       | chromosome 9 open reading fram        | 0.003  | 1.002 | 9.90E-01 | 9.90E+01 |  |
| 8158939 | NM_004188   | GFI1B        | growth factor independent 1B tra      | 0.026  | 1.018 | 8.00E-01 | 8.00E+01 |  |
| 8158952 | NM_001402   | EEF1A1       | eukaryotic translation elongation f   | -0.010 | 0.993 | 9.14E-01 | 9.14E+01 |  |
| 8158961 | NM_00112282 | GTF3C5       | general transcription factor IIIC, p  | -0.092 | 0.938 | 3.14E-01 | 3.14E+01 |  |
| 8158976 | NM_001807   | CEL          | carboxyl ester lipase (bile salt-stim | -0.034 | 0.977 | 8.44E-01 | 8.44E+01 |  |
| 8158987 | NR_001275   | CELP         | carboxyl ester lipase pseudogene      | -0.040 | 0.972 | 7.96E-01 | 7.96E+01 |  |
| 8158998 | NR_000016   | SNORD36C     | small nucleolar RNA, C/D box 36C      | -0.127 | 0.916 | 5.83E-01 | 5.83E+01 |  |

|         |              |           |                                                           |        |       |          |          |  |  |
|---------|--------------|-----------|-----------------------------------------------------------|--------|-------|----------|----------|--|--|
| 8159004 | NR_002447    | SNORD24   | small nucleolar RNA, C/D box 24                           | -0.080 | 0.946 | 8.47E-01 | 8.47E+01 |  |  |
| 8159008 | NM_017503    | SURF2     | surfeit 2                                                 | -0.040 | 0.973 | 8.57E-01 | 8.57E+01 |  |  |
| 8159017 | NM_153710    | C9orf96   | chromosome 9 open reading frame                           | -0.022 | 0.985 | 8.73E-01 | 8.73E+01 |  |  |
| 8159036 | NM_139025    | ADAMTS13  | ADAM metalloproteinase with thrombospondin type 1 motifs  | -0.061 | 0.959 | 2.72E-01 | 2.72E+01 |  |  |
| 8159078 | NM_017586    | C9orf7    | chromosome 9 open reading frame                           | 0.009  | 1.006 | 9.56E-01 | 9.56E+01 |  |  |
| 8159086 | NM_014694    | ADAMTS12  | ADAMTS-like 2                                             | -0.057 | 0.961 | 6.27E-01 | 6.27E+01 |  |  |
| 8159096 | NM_000787    | DBH       | dopamine beta-hydroxylase (dopa decarboxylase)            | -0.014 | 0.990 | 9.26E-01 | 9.26E+01 |  |  |
| 8159111 | NM_017588    | WDR5      | WD repeat domain 5                                        | -0.031 | 0.979 | 8.73E-01 | 8.73E+01 |  |  |
| 8159127 | NM_002957    | RXRA      | retinoid X receptor, alpha                                | 0.002  | 1.002 | 9.90E-01 | 9.90E+01 |  |  |
| 8159142 | NM_000093    | COL5A1    | collagen, type V, alpha 1                                 | -0.026 | 0.982 | 7.91E-01 | 7.91E+01 |  |  |
| 8159211 | NM_004108    | FCN2      | ficolin (collagen/fibrinogen domain)                      | -0.029 | 0.980 | 8.30E-01 | 8.30E+01 |  |  |
| 8159239 | BC034752     | C9orf62   | chromosome 9 open reading frame                           | -0.001 | 0.999 | 9.96E-01 | 9.96E+01 |  |  |
| 8159243 | NM_014811    | KIAA0649  | KIAA0649                                                  | -0.010 | 0.993 | 9.50E-01 | 9.50E+01 |  |  |
| 8159249 | NM_016034    | MRPS2     | mitochondrial ribosomal protein S2                        | 0.040  | 1.028 | 8.11E-01 | 8.11E+01 |  |  |
| 8159255 | NM_002297    | LCN1      | lipocalin 1 (tear prealbumin)                             | 0.019  | 1.013 | 9.27E-01 | 9.27E+01 |  |  |
| 8159259 | NM_014582    | OBP2A     | odorant binding protein 2A                                | 0.027  | 1.019 | 8.74E-01 | 8.74E+01 |  |  |
| 8159265 | NM_00101804  | PAEP      | progestagen-associated endometrial protein                | -0.022 | 0.985 | 8.35E-01 | 8.35E+01 |  |  |
| 8159283 | NM_020822    | KCNT1     | potassium channel, subfamily T, member 1                  | -0.091 | 0.939 | 2.08E-01 | 2.08E+01 |  |  |
| 8159318 | NM_00114563  | GPSM1     | G-protein signaling modulator 1 (alpha)                   | -0.025 | 0.983 | 8.23E-01 | 8.23E+01 |  |  |
| 8159337 | NM_015160    | PMPCA     | peptidase (mitochondrial processing)                      | 0.009  | 1.006 | 9.62E-01 | 9.62E+01 |  |  |
| 8159354 | NM_016215    | EGFL7     | EGF-like domain, multiple 7                               | -0.032 | 0.978 | 7.56E-01 | 7.56E+01 |  |  |
| 8159373 | NM_152421    | FAM69B    | family with sequence similarity 69                        | -0.038 | 0.974 | 7.48E-01 | 7.48E+01 |  |  |
| 8159379 | NM_032928    | TMEM141   | transmembrane protein 141                                 | 0.018  | 1.013 | 9.24E-01 | 9.24E+01 |  |  |
| 8159385 | NM_00103937  | KIAA1984  | KIAA1984                                                  | -0.042 | 0.971 | 6.45E-01 | 6.45E+01 |  |  |
| 8159415 | NM_024718    | C9orf86   | chromosome 9 open reading frame                           | 0.049  | 1.034 | 6.27E-01 | 6.27E+01 |  |  |
| 8159439 | NM_00108048  | LOC389813 | similar to CG15216-PA                                     | -0.029 | 0.980 | 8.47E-01 | 8.47E+01 |  |  |
| 8159441 | NM_00113586  | PHPT1     | phosphohistidine phosphatase 1                            | 0.031  | 1.022 | 8.82E-01 | 8.82E+01 |  |  |
| 8159448 | NM_206920    | MAMDC4    | MAM domain containing 4                                   | -0.041 | 0.972 | 5.93E-01 | 5.93E+01 |  |  |
| 8159476 | NM_021138    | TRAF2     | TNF receptor-associated factor 2                          | -0.113 | 0.924 | 7.05E-02 | 7.05E+00 |  |  |
| 8159491 | NM_000606    | C8G       | complement component 8, gamma                             | -0.066 | 0.955 | 5.37E-01 | 5.37E+01 |  |  |
| 8159501 | NM_178536    | LCN12     | lipocalin 12                                              | -0.014 | 0.990 | 9.09E-01 | 9.09E+01 |  |  |
| 8159519 | ENST00000371 | C9orf141  | chromosome 9 open reading frame                           | -0.078 | 0.947 | 4.34E-01 | 4.34E+01 |  |  |
| 8159521 | NM_000954    | PTGDS     | prostaglandin D2 synthase 21kDa                           | 0.004  | 1.003 | 9.82E-01 | 9.82E+01 |  |  |
| 8159531 | NM_207510    | LCNL1     | lipocalin-like 1                                          | -0.012 | 0.992 | 9.34E-01 | 9.34E+01 |  |  |
| 8159541 | BC002613     | C9orf142  | chromosome 9 open reading frame                           | -0.088 | 0.941 | 2.63E-01 | 2.63E+01 |  |  |
| 8159549 | NM_004479    | FUT7      | fucosyltransferase 7 (alpha (1,3) fucose)                 | -0.063 | 0.957 | 5.53E-01 | 5.53E+01 |  |  |
| 8159554 | NM_207309    | UAP1L1    | UDP-N-acetylglucosamine pyrophosphorylase                 | -0.009 | 0.994 | 9.63E-01 | 9.63E+01 |  |  |
| 8159566 | NM_016219    | MAN1B1    | mannosidase, alpha, class 1B, member 1                    | 0.046  | 1.032 | 6.57E-01 | 6.57E+01 |  |  |
| 8159583 | NM_007327    | GRIN1     | glutamate receptor, ionotropic, NMDA receptor 1           | -0.045 | 0.969 | 7.35E-01 | 7.35E+01 |  |  |
| 8159609 | NM_003731    | SSNA1     | Sjogren syndrome nuclear autoantigen                      | -0.044 | 0.970 | 7.48E-01 | 7.48E+01 |  |  |
| 8159616 | NM_00114402  | NDOR1     | NADPH dependent diflavin oxidoreductase                   | -0.074 | 0.950 | 4.13E-01 | 4.13E+01 |  |  |
| 8159624 | BC052297     | C9orf169  | chromosome 9 open reading frame                           | -0.010 | 0.993 | 9.42E-01 | 9.42E+01 |  |  |
| 8159627 | NM_080877    | SLC34A3   | solute carrier family 34 (sodium phosphate cotransporter) | -0.027 | 0.982 | 8.04E-01 | 8.04E+01 |  |  |
| 8159642 | NM_006088    | TUBB2C    | tubulin, beta 2C                                          | -0.145 | 0.905 | 3.16E-01 | 3.16E+01 |  |  |
| 8159646 | NM_00100435  | LOC441476 | hypothetical protein LOC441476                            | -0.026 | 0.982 | 8.73E-01 | 8.73E+01 |  |  |
| 8159654 | NM_015456    | COBRA1    | cofactor of BRCA1                                         | -0.033 | 0.977 | 7.95E-01 | 7.95E+01 |  |  |
| 8159667 | NM_017723    | C9orf167  | chromosome 9 open reading frame                           | -0.004 | 0.997 | 9.84E-01 | 9.84E+01 |  |  |
| 8159670 | NM_006647    | NOXA1     | NADPH oxidase activator 1                                 | -0.021 | 0.985 | 8.29E-01 | 8.29E+01 |  |  |
| 8159687 | NM_032477    | MRPL41    | mitochondrial ribosomal protein L41                       | -0.050 | 0.966 | 6.30E-01 | 6.30E+01 |  |  |
| 8159692 | NM_152285    | ARRDC1    | arrestin domain containing 1                              | -0.089 | 0.940 | 5.19E-01 | 5.19E+01 |  |  |
| 8159702 | NM_024757    | EHMT1     | euchromatic histone-lysine N-methyltransferase 1          | 0.004  | 1.003 | 9.79E-01 | 9.79E+01 |  |  |
| 8159732 | NR_024341    | FLJ40292  | hypothetical LOC643210                                    | 0.008  | 1.006 | 9.67E-01 | 9.67E+01 |  |  |
| 8159734 | NM_000718    | CACNA1B   | calcium channel, voltage-dependent, L-type, CACNA1B       | -0.054 | 0.963 | 4.49E-01 | 4.49E+01 |  |  |
| 8159786 | NR_027156    | TUBBP5    | tubulin, beta pseudogene 5                                | -0.020 | 0.986 | 9.03E-01 | 9.03E+01 |  |  |
| 8159790 | NR_024077    | WASH2P    | WAS protein family homolog 2 pseudogene                   | -0.047 | 0.968 | 6.47E-01 | 6.47E+01 |  |  |
| 8159808 | NM_207305    | FOXD4     | forkhead box D4                                           | -0.064 | 0.957 | 2.94E-01 | 2.94E+01 |  |  |
| 8159815 | NM_00114535  | CBWD1     | COBW domain containing 1                                  | 0.132  | 1.096 | 1.52E-01 | 1.52E+01 |  |  |
| 8159838 | NM_152569    | C9orf66   | chromosome 9 open reading frame                           | 0.052  | 1.037 | 8.63E-01 | 8.63E+01 |  |  |
| 8159854 | NM_014878    | KIAA0020  | KIAA0020                                                  | 0.049  | 1.034 | 8.47E-01 | 8.47E+01 |  |  |
| 8159873 | ---          | ---       | ---                                                       | -0.049 | 0.967 | 8.16E-01 | 8.16E+01 |  |  |
| 8159876 | NM_134428    | RFX3      | regulatory factor X, 3 (influences transcription)         | -0.013 | 0.991 | 9.63E-01 | 9.63E+01 |  |  |
| 8159945 | NM_016282    | AK3       | adenylate kinase 3                                        | -0.009 | 0.994 | 9.67E-01 | 9.67E+01 |  |  |
| 8159957 | ---          | ---       | ---                                                       | 0.081  | 1.058 | 5.71E-01 | 5.71E+01 |  |  |
| 8159961 | ---          | ---       | ---                                                       | 0.471  | 1.386 | 2.94E-01 | 2.94E+01 |  |  |
| 8159965 | ---          | ---       | ---                                                       | 0.422  | 1.339 | 2.70E-01 | 2.70E+01 |  |  |
| 8159981 | NM_006911    | RLN1      | relaxin 1                                                 | 0.070  | 1.050 | 7.39E-01 | 7.39E+01 |  |  |
| 8159992 | NM_024896    | ERMP1     | endoplasmic reticulum metalloproteinase                   | 0.138  | 1.100 | 3.36E-01 | 3.36E+01 |  |  |
| 8160011 | NM_00101796  | KIAA2026  | KIAA2026                                                  | 0.031  | 1.022 | 8.78E-01 | 8.78E+01 |  |  |
| 8160016 | NM_012416    | RANBP6    | RAN binding protein 6                                     | 0.026  | 1.018 | 9.06E-01 | 9.06E+01 |  |  |
| 8160024 | NM_000170    | GLDC      | glycine dehydrogenase (decarboxylating)                   | 0.086  | 1.062 | 6.84E-01 | 6.84E+01 |  |  |
| 8160033 | NM_003094    | SNRPE     | small nuclear ribonucleoprotein E                         | 0.020  | 1.014 | 9.18E-01 | 9.18E+01 |  |  |
| 8160036 | AK292632     | C9orf123  | chromosome 9 open reading frame                           | 0.072  | 1.051 | 7.21E-01 | 7.21E+01 |  |  |
| 8160151 | NM_178566    | ZDHHC21   | zinc finger, DHHC-type containing                         | 0.280  | 1.214 | 1.24E-01 | 1.24E+01 |  |  |
| 8160213 | NM_152574    | TTC39B    | tetratricopeptide repeat domain 39B                       | 0.127  | 1.092 | 6.00E-01 | 6.00E+01 |  |  |
| 8160238 | NM_033222    | PSIP1     | PC4 and SFRS1 interacting protein                         | 0.030  | 1.021 | 8.49E-01 | 8.49E+01 |  |  |
| 8160284 | NM_017645    | HAUS6     | HAUS augmin-like complex, subunit 6                       | -0.061 | 0.959 | 7.78E-01 | 7.78E+01 |  |  |
| 8160295 | NR_003009    | SCARNA8   | small Cajal body-specific RNA 8                           | -0.241 | 0.846 | 4.10E-01 | 4.10E+01 |  |  |

|         |              |              |                                                   |        |       |          |          |  |  |
|---------|--------------|--------------|---------------------------------------------------|--------|-------|----------|----------|--|--|
| 8160297 | NM_001122    | PLIN2        | perilipin 2                                       | -0.076 | 0.949 | 8.92E-01 | 8.92E+01 |  |  |
| 8160308 | NM_001010    | RPS6         | ribosomal protein S6                              | 0.006  | 1.004 | 9.67E-01 | 9.67E+01 |  |  |
| 8160332 | NM_004529    | MLLT3        | myeloid/lymphoid or mixed-lineage                 | -0.080 | 0.946 | 6.91E-01 | 6.91E+01 |  |  |
| 8160346 | NM_00101091  | PTPLAD2      | protein tyrosine phosphatase-like                 | 0.108  | 1.078 | 5.87E-01 | 5.87E+01 |  |  |
| 8160405 | NM_018847    | KLHL9        | kelch-like 9 (Drosophila)                         | 0.034  | 1.024 | 8.17E-01 | 8.17E+01 |  |  |
| 8160452 | NM_078487    | CDKN2B       | cyclin-dependent kinase inhibitor                 | -0.092 | 0.938 | 4.00E-01 | 4.00E+01 |  |  |
| 8160472 | NM_00100412  | TUSC1        | tumor suppressor candidate 1                      | -0.012 | 0.992 | 9.57E-01 | 9.57E+01 |  |  |
| 8160478 | BC071953     | C9orf82      | chromosome 9 open reading frame                   | 0.066  | 1.047 | 5.60E-01 | 5.60E+01 |  |  |
| 8160487 | NM_00103168  | PLAA         | phospholipase A2-activating protein               | 0.060  | 1.042 | 5.70E-01 | 5.70E+01 |  |  |
| 8160521 | NM_024761    | MOBK12B      | MOBK1, Mps One Binder kinase activator            | 0.192  | 1.143 | 2.26E-01 | 2.26E+01 |  |  |
| 8160531 | NM_018325    | C9orf72      | chromosome 9 open reading frame                   | 0.101  | 1.073 | 7.64E-01 | 7.64E+01 |  |  |
| 8160557 | ---          | ---          | ---                                               | -0.003 | 0.998 | 9.95E-01 | 9.95E+01 |  |  |
| 8160559 | NM_014314    | DDX58        | DEAD (Asp-Glu-Ala-Asp) box polypeptide            | 0.046  | 1.032 | 8.75E-01 | 8.75E+01 |  |  |
| 8160581 | NM_005802    | TOPORS       | topoisomerase I binding, arginine/serine          | -0.085 | 0.943 | 4.65E-01 | 4.65E+01 |  |  |
| 8160587 | NM_002493    | NDUFB6       | NADH dehydrogenase (ubiquinone) complex           | 0.028  | 1.019 | 9.26E-01 | 9.26E+01 |  |  |
| 8160602 | NM_175069    | APTX         | apoptosis-inducing factor                         | 0.052  | 1.037 | 6.68E-01 | 6.68E+01 |  |  |
| 8160622 | NM_018225    | SMU1         | smu-1 suppressor of mec-8 and unc-49              | 0.050  | 1.035 | 7.09E-01 | 7.09E+01 |  |  |
| 8160637 | NM_001497    | B4GALT1      | UDP-Gal:beta-GlcNAc 4-epimerase                   | 0.048  | 1.034 | 8.84E-01 | 8.84E+01 |  |  |
| 8160647 | NM_004323    | BAG1         | BCL2-associated athanogene                        | 0.099  | 1.071 | 4.29E-01 | 4.29E+01 |  |  |
| 8160663 | NM_001170    | AQP7         | aquaporin 7                                       | 0.107  | 1.077 | 5.06E-01 | 5.06E+01 |  |  |
| 8160670 | NM_004925    | AQP3         | aquaporin 3 (Gill blood group)                    | 0.012  | 1.009 | 9.48E-01 | 9.48E+01 |  |  |
| 8160682 | NM_022917    | NOL6         | nucleolar protein family 6 (RNA-associated)       | 0.006  | 1.004 | 9.77E-01 | 9.77E+01 |  |  |
| 8160718 | NR_023917    | PTENP1       | phosphatase and tensin homolog                    | -0.022 | 0.985 | 8.78E-01 | 8.78E+01 |  |  |
| 8160722 | NM_018449    | UBAP2        | ubiquitin associated protein 2                    | 0.007  | 1.005 | 9.56E-01 | 9.56E+01 |  |  |
| 8160756 | NM_015397    | DCAF12       | DBF1 and CUL4 associated factor                   | 0.204  | 1.152 | 6.25E-02 | 6.25E+00 |  |  |
| 8160767 | ---          | ---          | ---                                               | -0.013 | 0.991 | 9.78E-01 | 9.78E+01 |  |  |
| 8160769 | ---          | ---          | ---                                               | 0.042  | 1.029 | 8.05E-01 | 8.05E+01 |  |  |
| 8160782 | ---          | ---          | ---                                               | -0.068 | 0.954 | 6.38E-01 | 6.38E+01 |  |  |
| 8160786 | NM_020702    | KIAA1161     | KIAA1161                                          | 0.032  | 1.022 | 8.50E-01 | 8.50E+01 |  |  |
| 8160792 | NM_032596    | C9orf24      | chromosome 9 open reading frame                   | -0.055 | 0.963 | 7.10E-01 | 7.10E+01 |  |  |
| 8160805 | NM_147202    | C9orf25      | chromosome 9 open reading frame                   | -0.026 | 0.982 | 8.41E-01 | 8.41E+01 |  |  |
| 8160816 | NM_198573    | ENHO         | energy homeostasis associated                     | 0.011  | 1.008 | 9.56E-01 | 9.56E+01 |  |  |
| 8160823 | NM_147164    | CNTFR        | ciliary neurotrophic factor receptor              | -0.078 | 0.947 | 4.25E-01 | 4.25E+01 |  |  |
| 8160835 | NM_148179    | C9orf23      | chromosome 9 open reading frame                   | -0.011 | 0.993 | 9.54E-01 | 9.54E+01 |  |  |
| 8160839 | NM_024348    | DCTN3        | dynactin 3 (p22)                                  | -0.053 | 0.964 | 6.34E-01 | 6.34E+01 |  |  |
| 8160849 | NM_00101736  | ARID3C       | AT rich interactive domain 3C (BRG1)              | 0.056  | 1.040 | 6.75E-01 | 6.75E+01 |  |  |
| 8160857 | NM_005866    | SIGMAR1      | sigma non-opioid intracellular receptor           | -0.007 | 0.995 | 9.63E-01 | 9.63E+01 |  |  |
| 8160870 | NM_006664    | CCL27        | chemokine (C-C motif) ligand 27                   | -0.051 | 0.965 | 6.20E-01 | 6.20E+01 |  |  |
| 8160889 | NM_002989    | CCL21        | chemokine (C-C motif) ligand 21                   | -0.024 | 0.984 | 8.72E-01 | 8.72E+01 |  |  |
| 8160898 | NM_00114191  | C9orf144B    | hypothetical protein LOC259308                    | -0.049 | 0.967 | 8.01E-01 | 8.01E+01 |  |  |
| 8160912 | NM_203299    | C9orf131     | chromosome 9 open reading frame                   | -0.232 | 0.851 | 1.37E-01 | 1.37E+01 |  |  |
| 8160914 | NM_007126    | VCP          | valosin-containing protein                        | -0.080 | 0.946 | 5.99E-01 | 5.99E+01 |  |  |
| 8160935 | NM_004629    | FANCG        | Fanconi anemia, complementation group G           | -0.046 | 0.968 | 6.80E-01 | 6.80E+01 |  |  |
| 8160953 | NM_032634    | PIGO         | phosphatidylinositol glycan anchor                | -0.051 | 0.965 | 6.01E-01 | 6.01E+01 |  |  |
| 8160968 | NM_013442    | STOML2       | stomatatin (EPB72)-like 2                         | -0.014 | 0.990 | 9.50E-01 | 9.50E+01 |  |  |
| 8160981 | BC004406     | KIAA1539     | KIAA1539                                          | -0.007 | 0.995 | 9.75E-01 | 9.75E+01 |  |  |
| 8161017 | NM_014450    | SIT1         | signaling threshold regulating transducer         | -0.030 | 0.979 | 8.86E-01 | 8.86E+01 |  |  |
| 8161024 | NR_003051    | RMRP         | RNA component of mitochondrial ribosome           | 0.071  | 1.050 | 8.77E-01 | 8.77E+01 |  |  |
| 8161026 | NM_174923    | CCDC107      | coiled-coil domain containing 107                 | -0.015 | 0.990 | 9.00E-01 | 9.00E+01 |  |  |
| 8161044 | NM_003289    | TPM2         | tropomyosin 2 (beta)                              | -0.019 | 0.987 | 9.57E-01 | 9.57E+01 |  |  |
| 8161056 | NM_006289    | TLN1         | talin 1                                           | 0.043  | 1.030 | 7.94E-01 | 7.94E+01 |  |  |
| 8161114 | NM_020944    | GBA2         | glucosidase, beta (bile acid) 2                   | 0.005  | 1.004 | 9.84E-01 | 9.84E+01 |  |  |
| 8161147 | NM_032593    | HINT2        | histidine triad nucleotide binding protein 2      | 0.092  | 1.066 | 6.34E-01 | 6.34E+01 |  |  |
| 8161164 | NM_00100448  | OR13J1       | olfactory receptor, family 13, subfamily 1        | -0.067 | 0.955 | 6.65E-01 | 6.65E+01 |  |  |
| 8161166 | NM_019897    | OR2S2        | olfactory receptor, family 2, subfamily 2         | -0.035 | 0.976 | 7.44E-01 | 7.44E+01 |  |  |
| 8161169 | ---          | ---          | ---                                               | 0.044  | 1.031 | 5.71E-01 | 5.71E+01 |  |  |
| 8161174 | NM_005476    | GNE          | glucosamine (UDP-N-acetyl)-2-epimerase            | -0.064 | 0.957 | 6.99E-01 | 6.99E+01 |  |  |
| 8161192 | NM_194328    | RNF38        | ring finger protein 38                            | -0.034 | 0.977 | 8.40E-01 | 8.40E+01 |  |  |
| 8161211 | NM_016734    | PAX5         | paired box 5                                      | 0.224  | 1.168 | 1.89E-01 | 1.89E+01 |  |  |
| 8161229 | NM_012166    | FBXO10       | F-box protein 10                                  | 0.018  | 1.013 | 9.03E-01 | 9.03E+01 |  |  |
| 8161242 | NM_016042    | EXOSC3       | exosome component 3                               | -0.067 | 0.955 | 6.23E-01 | 6.23E+01 |  |  |
| 8161255 | NM_003028    | SHB          | Src homology 2 domain containing                  | 0.038  | 1.027 | 7.75E-01 | 7.75E+01 |  |  |
| 8161265 | NM_00100756  | IGFBPL1      | insulin-like growth factor binding protein-like 1 | 0.007  | 1.005 | 9.67E-01 | 9.67E+01 |  |  |
| 8161341 | NM_015667    | FAM75A7      | family with sequence similarity 75                | -0.014 | 0.991 | 9.19E-01 | 9.19E+01 |  |  |
| 8161353 | AK292642     | LOC554249    | hypothetical LOC554249                            | -0.052 | 0.965 | 6.78E-01 | 6.78E+01 |  |  |
| 8161362 | NR_003670    | KGFLP2       | keratinocyte growth factor-like protein 2         | -0.074 | 0.950 | 5.91E-01 | 5.91E+01 |  |  |
| 8161373 | ENST00000438 | LOC100289528 | hypothetical protein LOC100289528                 | -0.130 | 0.914 | 7.43E-01 | 7.43E+01 |  |  |
| 8161375 | ---          | ---          | ---                                               | 0.090  | 1.064 | 8.00E-01 | 8.00E+01 |  |  |
| 8161377 | ENST00000367 | MTHFD1L      | methylenetetrahydrofolate dehydrogenase           | -0.080 | 0.946 | 6.83E-01 | 6.83E+01 |  |  |
| 8161418 | NM_015234    | GPR116       | G protein-coupled receptor 116                    | -0.144 | 0.905 | 5.04E-01 | 5.04E+01 |  |  |
| 8161421 | ---          | ---          | ---                                               | -0.033 | 0.978 | 8.24E-01 | 8.24E+01 |  |  |
| 8161426 | BC119675     | FAM27E3      | family with sequence similarity 27                | -0.067 | 0.954 | 5.20E-01 | 5.20E+01 |  |  |
| 8161431 | ---          | ---          | ---                                               | 0.013  | 1.009 | 9.53E-01 | 9.53E+01 |  |  |
| 8161433 | ---          | ---          | ---                                               | 0.033  | 1.023 | 8.98E-01 | 8.98E+01 |  |  |
| 8161437 | BC119675     | FAM27E3      | family with sequence similarity 27                | -0.067 | 0.954 | 5.20E-01 | 5.20E+01 |  |  |
| 8161442 | ---          | ---          | ---                                               | -0.154 | 0.899 | 3.89E-01 | 3.89E+01 |  |  |
| 8161446 | BC032035     | FAM27E3      | family with sequence similarity 27                | -0.096 | 0.936 | 3.58E-01 | 3.58E+01 |  |  |

|         |              |                |                                       |        |       |          |          |  |  |
|---------|--------------|----------------|---------------------------------------|--------|-------|----------|----------|--|--|
| 8161451 | AK292642     | LOC554249      | hypothetical LOC554249                | -0.033 | 0.977 | 8.62E-01 | 8.62E+01 |  |  |
| 8161458 | NR_003670    | KGFLP2         | keratinocyte growth factor-like pr    | -0.016 | 0.989 | 9.22E-01 | 9.22E+01 |  |  |
| 8161471 | NM_015667    | //75A7 // FAM7 | family with sequence similarity 75    | -0.010 | 0.993 | 9.44E-01 | 9.44E+01 |  |  |
| 8161476 | ---          | ---            | ---                                   | -0.026 | 0.982 | 9.13E-01 | 9.13E+01 |  |  |
| 8161484 | ENST00000367 | MTHFD1L        | methylenetetrahydrofolate dehyd       | -0.123 | 0.918 | 6.11E-01 | 6.11E+01 |  |  |
| 8161488 | NR_002817    | AQP7P1         | aquaporin 7 pseudogene 1              | -0.043 | 0.971 | 7.00E-01 | 7.00E+01 |  |  |
| 8161499 | BC032035     | FAM27E3        | family with sequence similarity 27    | -0.096 | 0.936 | 3.70E-01 | 3.70E+01 |  |  |
| 8161503 | NR_024060    | FAM27A         | family with sequence similarity 27    | 0.016  | 1.011 | 9.48E-01 | 9.48E+01 |  |  |
| 8161509 | NM_004477    | FRG1           | FSHD region gene 1                    | 0.151  | 1.110 | 1.32E-01 | 1.32E+01 |  |  |
| 8161513 | NR_002836    | PGM5P2         | phosphoglucosyltransferase 5 pseudoge | 0.032  | 1.022 | 8.78E-01 | 8.78E+01 |  |  |
| 8161520 | NR_002836    | PGM5P2         | phosphoglucosyltransferase 5 pseudoge | 0.036  | 1.025 | 8.73E-01 | 8.73E+01 |  |  |
| 8161533 | NM_00108547  | FOXD4L6        | forkhead box D4-like 6                | -0.081 | 0.945 | 2.93E-01 | 2.93E+01 |  |  |
| 8161537 | NM_201453    | CBWD3          | COBW domain containing 3              | 0.106  | 1.076 | 3.39E-01 | 3.39E+01 |  |  |
| 8161554 | ENST00000438 | LOC100289528   | hypothetical protein LOC100289528     | -0.130 | 0.914 | 7.43E-01 | 7.43E+01 |  |  |
| 8161563 | ---          | ---            | ---                                   | 0.179  | 1.132 | 4.71E-02 | 4.71E+00 |  |  |
| 8161571 | NM_00109927  | FOXD4L2        | forkhead box D4-like 2                | -0.106 | 0.929 | 1.28E-01 | 1.28E+01 |  |  |
| 8161575 | ENST00000377 | CBWD5          | COBW domain containing 5              | 0.172  | 1.127 | 2.08E-01 | 2.08E+01 |  |  |
| 8161580 | ---          | ---            | ---                                   | 0.167  | 1.123 | 5.53E-02 | 5.53E+00 |  |  |
| 8161583 | NM_00109927  | FOXD4L2        | forkhead box D4-like 2                | -0.091 | 0.939 | 1.50E-01 | 1.50E+01 |  |  |
| 8161587 | NM_201453    | CBWD3          | COBW domain containing 3              | 0.103  | 1.074 | 2.78E-01 | 2.78E+01 |  |  |
| 8161615 | NM_002732    | PRKACG         | protein kinase, cAMP-dependent,       | -0.021 | 0.986 | 9.06E-01 | 9.06E+01 |  |  |
| 8161618 | NM_001163    | APBA1          | amyloid beta (A4) precursor prote     | 0.006  | 1.004 | 9.75E-01 | 9.75E+01 |  |  |
| 8161632 | NM_00109966  | PTAR1          | protein prenyltransferase alpha su    | 0.007  | 1.005 | 9.81E-01 | 9.81E+01 |  |  |
| 8161642 | ---          | ---            | ---                                   | 0.038  | 1.027 | 7.46E-01 | 7.46E+01 |  |  |
| 8161648 | NM_001206    | KLF9           | Kruppel-like factor 9                 | 0.048  | 1.034 | 6.59E-01 | 6.59E+01 |  |  |
| 8161693 | ---          | ---            | ---                                   | -0.035 | 0.976 | 8.31E-01 | 8.31E+01 |  |  |
| 8161701 | NM_013390    | TMEM2          | transmembrane protein 2               | -0.226 | 0.855 | 2.50E-02 | 2.50E+00 |  |  |
| 8161727 | NM_016014    | FAM108B1       | family with sequence similarity 10    | -0.063 | 0.957 | 6.47E-01 | 6.47E+01 |  |  |
| 8161747 | NM_00110242  | ZFAND5         | zinc finger, AN1-type domain 5        | -0.119 | 0.921 | 6.02E-01 | 6.02E+01 |  |  |
| 8161824 | NM_017998    | C9orf40        | chromosome 9 open reading fram        | -0.046 | 0.968 | 7.27E-01 | 7.27E+01 |  |  |
| 8161829 | BC034033     | C9orf41        | chromosome 9 open reading fram        | 0.048  | 1.034 | 7.63E-01 | 7.63E+01 |  |  |
| 8161852 | ---          | ---            | ---                                   | -0.252 | 0.840 | 2.99E-01 | 2.99E+01 |  |  |
| 8161857 | NM_018339    | RFK            | riboflavin kinase                     | 0.040  | 1.028 | 8.29E-01 | 8.29E+01 |  |  |
| 8161865 | NM_015225    | PRUNE2         | prune homolog 2 (Drosophila)          | -0.042 | 0.971 | 8.01E-01 | 8.01E+01 |  |  |
| 8161906 | NM_002072    | GNAQ           | guanine nucleotide binding protei     | 0.156  | 1.115 | 5.89E-01 | 5.89E+01 |  |  |
| 8161919 | NM_005077    | TLE1           | transducin-like enhancer of split 1   | 0.086  | 1.062 | 7.10E-01 | 7.10E+01 |  |  |
| 8161938 | ---          | ---            | ---                                   | -0.005 | 0.997 | 9.88E-01 | 9.88E+01 |  |  |
| 8161943 | BC047037     | LOC644714      | hypothetical protein LOC644714        | 0.052  | 1.037 | 9.49E-01 | 9.49E+01 |  |  |
| 8161964 | NM_174938    | FRMD3          | FERM domain containing 3              | 0.108  | 1.078 | 3.03E-01 | 3.03E+01 |  |  |
| 8161988 | NM_013438    | UBQLN1         | ubiquilin 1                           | 0.025  | 1.018 | 8.18E-01 | 8.18E+01 |  |  |
| 8162019 | NM_017576    | KIF27          | kinesin family member 27              | -0.059 | 0.960 | 8.27E-01 | 8.27E+01 |  |  |
| 8162047 | NM_002140    | HNRNPK         | heterogeneous nuclear ribonucleo      | -0.003 | 0.998 | 9.85E-01 | 9.85E+01 |  |  |
| 8162059 | NM_022127    | SLC28A3        | solute carrier family 28 (sodium-co   | 0.340  | 1.265 | 3.00E-01 | 3.00E+01 |  |  |
| 8162082 | ---          | ---            | ---                                   | 0.024  | 1.017 | 9.44E-01 | 9.44E+01 |  |  |
| 8162086 | NM_015239    | AGTPBP1        | ATP/GTP binding protein 1             | 0.065  | 1.046 | 6.59E-01 | 6.59E+01 |  |  |
| 8162117 | NM_016548    | GOLM1          | golgi membrane protein 1              | -0.001 | 1.000 | 9.98E-01 | 9.98E+01 |  |  |
| 8162140 | ---          | ---            | ---                                   | -0.013 | 0.991 | 9.64E-01 | 9.64E+01 |  |  |
| 8162142 | NM_030940    | ISCA1          | iron-sulfur cluster assembly 1 hom    | 0.048  | 1.033 | 8.17E-01 | 8.17E+01 |  |  |
| 8162147 | NM_024617    | ZCCHC6         | zinc finger, CCHC domain containi     | 0.025  | 1.017 | 8.73E-01 | 8.73E+01 |  |  |
| 8162177 | ---          | ---            | ---                                   | 0.000  | 1.000 | 9.99E-01 | 9.99E+01 |  |  |
| 8162179 | NM_002048    | GAS1           | growth arrest-specific 1              | -0.094 | 0.937 | 2.75E-01 | 2.75E+01 |  |  |
| 8162194 | NM_178432    | CCRK           | cell cycle related kinase             | -0.030 | 0.979 | 8.08E-01 | 8.08E+01 |  |  |
| 8162214 | NM_00114512  | // FAM75C1 //  | family with sequence similarity 75    | -0.035 | 0.976 | 7.51E-01 | 7.51E+01 |  |  |
| 8162216 | NM_016848    | SHC3           | SHC [Src homology 2 domain cont       | -0.082 | 0.944 | 2.84E-01 | 2.84E+01 |  |  |
| 8162231 | NM_00114228  | SEMA4D         | sema domain, immunoglobulin do        | 0.055  | 1.039 | 7.26E-01 | 7.26E+01 |  |  |
| 8162236 | NM_006378    | SEMA4D         | sema domain, immunoglobulin do        | 0.029  | 1.020 | 8.67E-01 | 8.67E+01 |  |  |
| 8162247 | ---          | ---            | ---                                   | -0.019 | 0.987 | 8.91E-01 | 8.91E+01 |  |  |
| 8162254 | NM_017594    | DIRAS2         | DIRAS family, GTP-binding RAS-like    | 0.087  | 1.062 | 4.37E-01 | 4.37E+01 |  |  |
| 8162260 | ---          | ---            | ---                                   | -0.060 | 0.959 | 8.18E-01 | 8.18E+01 |  |  |
| 8162264 | NM_001698    | AUH            | AU RNA binding protein/enoyl-Co       | 0.001  | 1.001 | 9.96E-01 | 9.96E+01 |  |  |
| 8162276 | NM_005384    | NFIL3          | nuclear factor, interleukin 3 regula  | -0.142 | 0.906 | 5.97E-01 | 5.97E+01 |  |  |
| 8162294 | NM_006415    | SPTLC1         | serine palmitoyltransferase, long c   | 0.070  | 1.050 | 6.80E-01 | 6.80E+01 |  |  |
| 8162313 | NM_013417    | IARS           | isoleucyl-tRNA synthetase             | -0.064 | 0.957 | 7.15E-01 | 7.15E+01 |  |  |
| 8162352 | NR_024020    | NOL8           | nucleolar protein 8                   | 0.033  | 1.023 | 8.18E-01 | 8.18E+01 |  |  |
| 8162421 | NM_022755    | IPPK           | inositol 1,3,4,5,6-pentakisphospha    | -0.051 | 0.966 | 6.66E-01 | 6.66E+01 |  |  |
| 8162438 | NM_00100380  | BICD2          | bicaudal D homolog 2 (Drosophila)     | -0.007 | 0.995 | 9.71E-01 | 9.71E+01 |  |  |
| 8162449 | NM_031486    | ZNF484         | zinc finger protein 484               | -0.033 | 0.977 | 9.11E-01 | 9.11E+01 |  |  |
| 8162455 | NM_004148    | NINJ1          | ninjurin 1                            | -0.124 | 0.918 | 1.78E-01 | 1.78E+01 |  |  |
| 8162462 | NM_014612    | FAM120A        | family with sequence similarity 12    | 0.076  | 1.054 | 6.75E-01 | 6.75E+01 |  |  |
| 8162466 | NM_198841    | FAM120AOS      | family with sequence similarity 12    | -0.056 | 0.962 | 6.12E-01 | 6.12E+01 |  |  |
| 8162472 | NM_021570    | BARX1          | BARX homeobox 1                       | -0.009 | 0.994 | 9.60E-01 | 9.60E+01 |  |  |
| 8162479 | NM_017561    | FAM22F         | family with sequence similarity 22    | -0.026 | 0.982 | 8.41E-01 | 8.41E+01 |  |  |
| 8162490 | NM_032558    | HIATL1         | hippocampus abundant transcript       | 0.057  | 1.041 | 7.42E-01 | 7.42E+01 |  |  |
| 8162529 | ---          | ---            | ---                                   | 0.054  | 1.038 | 8.97E-01 | 8.97E+01 |  |  |
| 8162531 | ---          | ---            | ---                                   | -0.454 | 0.730 | 1.57E-01 | 1.57E+01 |  |  |
| 8162533 | NM_00108360  | PTCH1          | patched homolog 1 (Drosophila)        | 0.056  | 1.039 | 7.41E-01 | 7.41E+01 |  |  |
| 8162562 | NR_023389    | C9orf130       | chromosome 9 open reading fram        | 0.022  | 1.016 | 9.09E-01 | 9.09E+01 |  |  |

|         |             |          |                                                            |        |       |          |          |  |  |
|---------|-------------|----------|------------------------------------------------------------|--------|-------|----------|----------|--|--|
| 8162586 | NM_007001   | SLC35D2  | solute carrier family 35, member 2                         | 0.073  | 1.052 | 7.83E-01 | 7.83E+01 |  |  |
| 8162601 | NM_153695   | ZNF367   | zinc finger protein 367                                    | 0.013  | 1.009 | 9.53E-01 | 9.53E+01 |  |  |
| 8162610 | NM_033331   | CDC14B   | CDC14 cell division cycle 14 homolog                       | -0.007 | 0.995 | 9.73E-01 | 9.73E+01 |  |  |
| 8162631 | NM_014930   | ZNF510   | zinc finger protein 510                                    | -0.010 | 0.993 | 9.68E-01 | 9.68E+01 |  |  |
| 8162645 | NR_002894   | HIATL2   | hippocampus abundant transcript 2                          | -0.059 | 0.960 | 6.83E-01 | 6.83E+01 |  |  |
| 8162664 | AY358791    | UNQ5836  | HSAL5836                                                   | -0.160 | 0.895 | 6.07E-02 | 6.07E+00 |  |  |
| 8162696 | NR_027302   | XPA      | xeroderma pigmentosum, complementation group A             | 0.009  | 1.007 | 9.62E-01 | 9.62E+01 |  |  |
| 8162706 | NM_016481   | C9orf156 | chromosome 9 open reading frame 156                        | -0.058 | 0.960 | 6.99E-01 | 6.99E+01 |  |  |
| 8162729 | NM_014788   | TRIM14   | tripartite motif-containing 14                             | 0.037  | 1.026 | 7.92E-01 | 7.92E+01 |  |  |
| 8162759 | NM_018421   | TBC1D2   | TBC1 domain family, member 2                               | -0.075 | 0.949 | 7.81E-01 | 7.81E+01 |  |  |
| 8162777 | NM_005458   | GABBR2   | gamma-aminobutyric acid (GABA) receptor 2                  | 0.047  | 1.033 | 6.51E-01 | 6.51E+01 |  |  |
| 8162803 | NM_173551   | ANKS6    | ankyrin repeat and sterile alpha motif domain 6            | 0.036  | 1.025 | 7.68E-01 | 7.68E+01 |  |  |
| 8162823 | ---         | ---      | ---                                                        | -0.103 | 0.931 | 6.35E-01 | 6.35E+01 |  |  |
| 8162825 | ---         | ---      | ---                                                        | -0.071 | 0.952 | 5.91E-01 | 5.91E+01 |  |  |
| 8162827 | NR_024532   | ALG2     | asparagine-linked glycosylation 2, alpha mannosidase       | -0.002 | 0.999 | 9.89E-01 | 9.89E+01 |  |  |
| 8162833 | NM_015051   | ERP44    | endoplasmic reticulum protein 44                           | 0.254  | 1.192 | 5.88E-02 | 5.88E+00 |  |  |
| 8162848 | ---         | ---      | ---                                                        | 0.002  | 1.002 | 9.91E-01 | 9.91E+01 |  |  |
| 8162850 | NM_017746   | TEX10    | testis expressed 10                                        | -0.015 | 0.990 | 9.60E-01 | 9.60E+01 |  |  |
| 8162868 | ---         | ---      | ---                                                        | -0.027 | 0.982 | 8.50E-01 | 8.50E+01 |  |  |
| 8162880 | NM_019051   | MRPL50   | mitochondrial ribosomal protein L50                        | 0.077  | 1.055 | 7.39E-01 | 7.39E+01 |  |  |
| 8162920 | NM_147180   | PPP3R2   | protein phosphatase 3 (formerly 2C), regulatory subunit 2  | -0.018 | 0.987 | 9.27E-01 | 9.27E+01 |  |  |
| 8162940 | NM_005502   | ABCA1    | ATP-binding cassette, sub-family A, member 1               | -0.039 | 0.973 | 9.64E-01 | 9.64E+01 |  |  |
| 8162998 | ---         | ---      | ---                                                        | -0.061 | 0.959 | 7.00E-01 | 7.00E+01 |  |  |
| 8163000 | ---         | ---      | ---                                                        | -0.081 | 0.945 | 7.67E-01 | 7.67E+01 |  |  |
| 8163002 | NM_004235   | KLF4     | Kruppel-like factor 4 (gut)                                | -0.010 | 0.993 | 9.68E-01 | 9.68E+01 |  |  |
| 8163013 | ---         | ---      | ---                                                        | 0.073  | 1.052 | 5.40E-01 | 5.40E+01 |  |  |
| 8163015 | ---         | ---      | ---                                                        | -0.020 | 0.986 | 9.27E-01 | 9.27E+01 |  |  |
| 8163019 | NM_006686   | ACTL7B   | actin-like 7B                                              | 0.000  | 1.000 | 1.00E+00 | 1.00E+02 |  |  |
| 8163023 | NM_003640   | IKBKAP   | inhibitor of kappa light polypeptide chain induced by IL-1 | 0.004  | 1.002 | 9.87E-01 | 9.87E+01 |  |  |
| 8163086 | NM_032012   | C9orf5   | chromosome 9 open reading frame 5                          | -0.084 | 0.944 | 4.70E-01 | 4.70E+01 |  |  |
| 8163105 | ---         | ---      | ---                                                        | -0.061 | 0.959 | 9.07E-01 | 9.07E+01 |  |  |
| 8163107 | ---         | ---      | ---                                                        | 0.118  | 1.085 | 7.35E-01 | 7.35E+01 |  |  |
| 8163109 | NM_014334   | C9orf4   | chromosome 9 open reading frame 4                          | -0.012 | 0.992 | 9.50E-01 | 9.50E+01 |  |  |
| 8163147 | ---         | ---      | ---                                                        | -0.031 | 0.979 | 8.13E-01 | 8.13E+01 |  |  |
| 8163257 | NM_057159   | LPAR1    | lysophosphatidic acid receptor 1                           | 0.163  | 1.119 | 7.29E-01 | 7.29E+01 |  |  |
| 8163271 | ---         | ---      | ---                                                        | 0.137  | 1.100 | 4.55E-01 | 4.55E+01 |  |  |
| 8163275 | NM_00108039 | KIAA0368 | KIAA0368                                                   | -0.053 | 0.964 | 6.89E-01 | 6.89E+01 |  |  |
| 8163326 | ---         | ---      | ---                                                        | -0.030 | 0.979 | 9.55E-01 | 9.55E+01 |  |  |
| 8163383 | NM_022486   | SUSD1    | sushi domain containing 1                                  | 0.083  | 1.059 | 8.16E-01 | 8.16E+01 |  |  |
| 8163402 | NM_005156   | ROD1     | ROD1 regulator of differentiation 1                        | 0.030  | 1.021 | 8.05E-01 | 8.05E+01 |  |  |
| 8163424 | ---         | ---      | ---                                                        | 0.196  | 1.146 | 3.04E-01 | 3.04E+01 |  |  |
| 8163426 | ---         | ---      | ---                                                        | 0.006  | 1.004 | 9.81E-01 | 9.81E+01 |  |  |
| 8163428 | AK000637    | C9orf80  | chromosome 9 open reading frame 80                         | 0.050  | 1.035 | 8.05E-01 | 8.05E+01 |  |  |
| 8163437 | NM_033051   | SLC46A2  | solute carrier family 46, member 2                         | 0.012  | 1.008 | 9.43E-01 | 9.43E+01 |  |  |
| 8163481 | NM_139286   | CDC26    | cell division cycle 26 homolog (S. cerevisiae)             | 0.035  | 1.025 | 8.57E-01 | 8.57E+01 |  |  |
| 8163485 | NM_145051   | RNF183   | ring finger protein 183                                    | -0.022 | 0.985 | 9.07E-01 | 9.07E+01 |  |  |
| 8163491 | NM_00101236 | WDR31    | WD repeat domain 31                                        | -0.052 | 0.964 | 6.68E-01 | 6.68E+01 |  |  |
| 8163505 | NM_031219   | HDHD3    | haloacid dehalogenase-like hydrolase domain 3              | -0.083 | 0.944 | 4.04E-01 | 4.04E+01 |  |  |
| 8163509 | NM_000031   | ALAD     | aminolevulinic acid, delta-, dehydratase                   | 0.054  | 1.038 | 6.59E-01 | 6.59E+01 |  |  |
| 8163525 | NR_027261   | POLE3    | polymerease (DNA directed), epsilon                        | 0.023  | 1.016 | 8.89E-01 | 8.89E+01 |  |  |
| 8163533 | AK056275    | FLJ31713 | hypothetical protein FLJ31713                              | -0.026 | 0.982 | 8.79E-01 | 8.79E+01 |  |  |
| 8163535 | NM_001633   | AMBP     | alpha-1-microglobulin/bikunin precursor                    | -0.038 | 0.974 | 8.33E-01 | 8.33E+01 |  |  |
| 8163548 | NM_138424   | KIF12    | kinesin family member 12                                   | 0.008  | 1.006 | 9.58E-01 | 9.58E+01 |  |  |
| 8163569 | NM_030767   | AKNA     | AT-hook transcription factor                               | -0.080 | 0.946 | 3.43E-01 | 3.43E+01 |  |  |
| 8163599 | NM_015404   | DFNB31   | deafness, autosomal recessive 31                           | -0.038 | 0.974 | 7.68E-01 | 7.68E+01 |  |  |
| 8163616 | ---         | ---      | ---                                                        | 0.264  | 1.200 | 7.63E-01 | 7.63E+01 |  |  |
| 8163618 | NM_005118   | TNFSF15  | tumor necrosis factor (ligand) superfamily 15              | -0.111 | 0.926 | 6.05E-01 | 6.05E+01 |  |  |
| 8163629 | NM_001244   | TNFSF8   | tumor necrosis factor (ligand) superfamily 8               | -0.069 | 0.953 | 8.39E-01 | 8.39E+01 |  |  |
| 8163678 | NM_198186   | ASTN2    | astrotactin 2                                              | -0.023 | 0.984 | 8.04E-01 | 8.04E+01 |  |  |
| 8163710 | NR_003708   | SNORA70C | small nucleolar RNA, H/ACA box 70C                         | 0.068  | 1.048 | 7.36E-01 | 7.36E+01 |  |  |
| 8163714 | ---         | ---      | ---                                                        | 0.009  | 1.006 | 9.81E-01 | 9.81E+01 |  |  |
| 8163729 | ---         | ---      | ---                                                        | -0.004 | 0.997 | 9.86E-01 | 9.86E+01 |  |  |
| 8163731 | ---         | ---      | ---                                                        | -0.054 | 0.963 | 8.05E-01 | 8.05E+01 |  |  |
| 8163733 | NM_018249   | CDK5RAP2 | CDK5 regulatory subunit associated protein 2               | -0.086 | 0.942 | 4.54E-01 | 4.54E+01 |  |  |
| 8163775 | NM_00108049 | MEGF9    | multiple EGF-like-domains 9                                | -0.095 | 0.937 | 7.73E-01 | 7.73E+01 |  |  |
| 8163784 | NM_012164   | FBXW2    | F-box and WD repeat domain containing 2                    | 0.026  | 1.018 | 9.09E-01 | 9.09E+01 |  |  |
| 8163795 | NM_005047   | PSMD5    | proteasome (prosome, macropain, 20S) non-ATPase subunit 5  | 0.056  | 1.040 | 7.50E-01 | 7.50E+01 |  |  |
| 8163807 | NM_015651   | PHF19    | PHD finger protein 19                                      | -0.055 | 0.963 | 6.58E-01 | 6.58E+01 |  |  |
| 8163825 | NM_005658   | TRAF1    | TNF receptor-associated factor 1                           | -0.310 | 0.807 | 5.85E-03 | 5.85E-01 |  |  |
| 8163882 | NM_016322   | RAB14    | RAB14, member RAS oncogene family                          | 0.125  | 1.090 | 7.99E-02 | 7.99E+00 |  |  |
| 8163892 | AF220263    | C9orf31  | chromosome 9 open reading frame 31                         | 0.248  | 1.187 | 4.83E-02 | 4.83E+00 |  |  |
| 8163896 | NM_004099   | STOM     | stomatatin                                                 | 0.236  | 1.177 | 3.50E-01 | 3.50E+01 |  |  |
| 8163916 | NM_00113944 | TTL11    | tuabin tyrosine ligase-like family, member 11              | -0.068 | 0.954 | 4.16E-01 | 4.16E+01 |  |  |
| 8163930 | NM_014222   | NDUFA8   | NADH dehydrogenase (ubiquinone) complex I subunit 8        | -0.097 | 0.935 | 6.51E-01 | 6.51E+01 |  |  |
| 8163936 | NM_014368   | LHX6     | LIM homeobox 6                                             | 0.052  | 1.037 | 7.09E-01 | 7.09E+01 |  |  |
| 8163948 | NR_027125   | RBM18    | RNA binding motif protein 18                               | 0.062  | 1.044 | 6.91E-01 | 6.91E+01 |  |  |
| 8163960 | NM_00100445 | OR1L8    | olfactory receptor, family 1, subfamily 8                  | 0.028  | 1.020 | 8.42E-01 | 8.42E+01 |  |  |

|         |              |            |                                     |        |       |          |          |  |
|---------|--------------|------------|-------------------------------------|--------|-------|----------|----------|--|
| 8163962 | NM_00100445  | OR1B1      | olfactory receptor, family 1, subfa | 0.046  | 1.033 | 7.10E-01 | 7.10E+01 |  |
| 8163964 | NM_005388    | PDCL       | phosducin-like                      | -0.059 | 0.960 | 7.73E-01 | 7.73E+01 |  |
| 8163972 | NM_00110058  | RC3H2      | ring finger and CCH-type zinc fing  | 0.030  | 1.021 | 8.77E-01 | 8.77E+01 |  |
| 8163999 | NM_006626    | ZBTB6      | zinc finger and BTB domain contain  | -0.042 | 0.972 | 7.13E-01 | 7.13E+01 |  |
| 8164006 | ---          | ---        | ---                                 | 0.237  | 1.179 | 3.72E-01 | 3.72E+01 |  |
| 8164008 | NR_026677    | C9orf45    | chromosome 9 open reading fram      | -0.034 | 0.977 | 9.05E-01 | 9.05E+01 |  |
| 8164013 | NM_018387    | STRBP      | spermatid perinuclear RNA bindin    | 0.062  | 1.044 | 7.92E-01 | 7.92E+01 |  |
| 8164034 | NM_020946    | DENN1A     | DENN/MADD domain containing 1       | 0.138  | 1.100 | 2.74E-01 | 2.74E+01 |  |
| 8164060 | ---          | ---        | ---                                 | -0.055 | 0.962 | 7.68E-01 | 7.68E+01 |  |
| 8164062 | AY567967     | LOC613206  | myeloproliferative disease associa  | 0.108  | 1.077 | 4.29E-01 | 4.29E+01 |  |
| 8164067 | NM_002799    | PSMB7      | proteasome (prosome, macropain      | -0.137 | 0.909 | 3.40E-01 | 3.40E+01 |  |
| 8164077 | NM_004959    | NR5A1      | nuclear receptor subfamily 5, grou  | 0.031  | 1.022 | 8.49E-01 | 8.49E+01 |  |
| 8164100 | NM_007209    | RPL35      | ribosomal protein L35               | 0.001  | 1.001 | 9.98E-01 | 9.98E+01 |  |
| 8164105 | NM_002077    | GOLGA1     | golgi autoantigen, golgin subfamili | 0.043  | 1.030 | 8.04E-01 | 8.04E+01 |  |
| 8164129 | ---          | ---        | ---                                 | 0.060  | 1.043 | 8.81E-01 | 8.81E+01 |  |
| 8164131 | NM_173690    | SCAI       | suppressor of cancer cell invasion  | 0.011  | 1.008 | 9.71E-01 | 9.71E+01 |  |
| 8164153 | ---          | ---        | ---                                 | -0.054 | 0.963 | 8.52E-01 | 8.52E+01 |  |
| 8164155 | NM_00112335  | PPP6C      | protein phosphatase 6, catalytic su | 0.033  | 1.023 | 7.75E-01 | 7.75E+01 |  |
| 8164165 | NM_005347    | HSPA5      | heat shock 70kDa protein 5 (gluco   | 0.235  | 1.177 | 1.46E-01 | 1.46E+01 |  |
| 8164177 | NM_00100661  | MAPKAP1    | mitogen-activated protein kinase    | 0.037  | 1.026 | 8.29E-01 | 8.29E+01 |  |
| 8164200 | NM_012098    | ANGPTL2    | angiotensin-like 2                  | -0.039 | 0.973 | 6.70E-01 | 6.70E+01 |  |
| 8164210 | NM_000976    | RPL12      | ribosomal protein L12               | 0.115  | 1.083 | 6.11E-01 | 6.11E+01 |  |
| 8164215 | NR_002449    | SNORA65    | small nucleolar RNA, H/ACA box 6    | -0.095 | 0.936 | 5.98E-01 | 5.98E+01 |  |
| 8164217 | NM_022833    | FAM129B    | family with sequence similarity 12  | -0.051 | 0.965 | 7.52E-01 | 7.52E+01 |  |
| 8164235 | NM_00100291  | PTRH1      | peptidyl-tRNA hydrolase 1 homolo    | -0.001 | 1.000 | 9.98E-01 | 9.98E+01 |  |
| 8164243 | NM_130459    | TOR2A      | torsin family 2, member A           | -0.064 | 0.957 | 5.08E-01 | 5.08E+01 |  |
| 8164252 | NM_170600    | SH2D3C     | SH2 domain containing 3C            | -0.018 | 0.988 | 9.20E-01 | 9.20E+01 |  |
| 8164269 | NM_000118    | ENG        | endoglin                            | 0.137  | 1.099 | 4.51E-01 | 4.51E+01 |  |
| 8164293 | NM_000476    | AK1        | adenylate kinase 1                  | -0.186 | 0.879 | 3.67E-01 | 3.67E+01 |  |
| 8164304 | NM_013443    | ST6GALNAC6 | ST6 (alpha-N-acetyl-neuraminyl-2,   | -0.168 | 0.890 | 1.60E-01 | 1.60E+01 |  |
| 8164314 | NM_175039    | ST6GALNAC4 | ST6 (alpha-N-acetyl-neuraminyl-2,   | 0.025  | 1.017 | 8.58E-01 | 8.58E+01 |  |
| 8164336 | NM_003863    | DPM2       | dolichyl-phosphate mannosyltrans    | 0.008  | 1.006 | 9.75E-01 | 9.75E+01 |  |
| 8164343 | NM_00103525  | FAM102A    | family with sequence similarity 10  | -0.291 | 0.817 | 3.33E-02 | 3.33E+00 |  |
| 8164362 | NM_025072    | PTGES2     | prostaglandin E synthase 2          | -0.052 | 0.964 | 5.23E-01 | 5.23E+01 |  |
| 8164373 | NM_012127    | CIZ1       | CDKN1A interacting zinc finger pro  | -0.041 | 0.972 | 5.73E-01 | 5.73E+01 |  |
| 8164398 | NM_004486    | GOLGA2     | golgi autoantigen, golgin subfamili | -0.093 | 0.938 | 2.19E-01 | 2.19E+01 |  |
| 8164428 | NM_015679    | TRUB2      | TruB pseudouridine (psi) synthase   | -0.110 | 0.927 | 2.34E-01 | 2.34E+01 |  |
| 8164440 | NM_052844    | WDR34      | WD repeat domain 34                 | -0.025 | 0.983 | 8.48E-01 | 8.48E+01 |  |
| 8164452 | NM_032799    | ZDHHC12    | zinc finger, DHHC-type containing   | -0.009 | 0.994 | 9.56E-01 | 9.56E+01 |  |
| 8164464 | NM_006336    | ZER1       | zer-1 homolog (C. elegans)          | -0.185 | 0.880 | 1.37E-03 | 1.37E-01 |  |
| 8164481 | NM_016390    | C9orf114   | chromosome 9 open reading fram      | -0.006 | 0.996 | 9.68E-01 | 9.68E+01 |  |
| 8164496 | NM_004059    | CCB1       | cysteine conjugate-beta lyase, cyto | -0.074 | 0.950 | 5.06E-01 | 5.06E+01 |  |
| 8164515 | NM_014908    | DOLK       | dolichol kinase                     | 0.047  | 1.033 | 7.25E-01 | 7.25E+01 |  |
| 8164521 | NM_020145    | SH3GLB2    | SH3-domain GRB2-like endophilin     | -0.046 | 0.968 | 7.34E-01 | 7.34E+01 |  |
| 8164535 | NM_000755    | CRAT       | carnitine acetyltransferase         | -0.084 | 0.944 | 2.84E-01 | 2.84E+01 |  |
| 8164554 | NM_203434    | IER5L      | immediate early response 5-like     | -0.052 | 0.964 | 4.43E-01 | 4.43E+01 |  |
| 8164560 | ---          | ---        | ---                                 | 0.025  | 1.018 | 8.41E-01 | 8.41E+01 |  |
| 8164562 | NM_199350    | C9orf50    | chromosome 9 open reading fram      | -0.055 | 0.963 | 6.23E-01 | 6.23E+01 |  |
| 8164572 | NM_017873    | ASB6       | ankyrin repeat and SOCS box-cont    | -0.002 | 0.998 | 9.89E-01 | 9.89E+01 |  |
| 8164580 | NM_004878    | PTGES      | prostaglandin E synthase            | -0.223 | 0.857 | 2.47E-02 | 2.47E+00 |  |
| 8164587 | NM_000113    | TOR1A      | torsin family 1, member A (torsin   | 0.092  | 1.066 | 5.52E-01 | 5.52E+01 |  |
| 8164596 | NM_016520    | C9orf78    | chromosome 9 open reading fram      | -0.045 | 0.969 | 7.72E-01 | 7.72E+01 |  |
| 8164607 | NM_015033    | FNBP1      | formin binding protein 1            | -0.085 | 0.943 | 1.29E-01 | 1.29E+01 |  |
| 8164627 | ENST00000358 | FLJ46836   | FLJ46836 protein                    | -0.067 | 0.955 | 4.32E-01 | 4.32E+01 |  |
| 8164630 | NM_198180    | QRF        | pyroglutamylated RFamide peptid     | -0.033 | 0.977 | 8.06E-01 | 8.06E+01 |  |
| 8164632 | NM_032843    | FIBCD1     | fibrinogen C domain containing 1    | -0.041 | 0.972 | 7.03E-01 | 7.03E+01 |  |
| 8164644 | NM_033387    | FAM78A     | family with sequence similarity 78  | 0.135  | 1.098 | 2.09E-01 | 2.09E+01 |  |
| 8164649 | NM_013318    | BAT2L      | HLA-B associated transcript 2-like  | -0.048 | 0.967 | 7.54E-01 | 7.54E+01 |  |
| 8164653 | NM_031432    | UCK1       | uridine-cytidine kinase 1           | -0.120 | 0.920 | 3.38E-01 | 3.38E+01 |  |
| 8164665 | NM_005312    | RAPGEF1    | Rap guanine nucleotide exchange     | 0.125  | 1.091 | 4.50E-01 | 4.50E+01 |  |
| 8164692 | AF467069     | RAPGEF1    | Rap guanine nucleotide exchange     | 0.091  | 1.065 | 7.51E-01 | 7.51E+01 |  |
| 8164694 | ---          | ---        | ---                                 | -0.039 | 0.973 | 8.92E-01 | 8.92E+01 |  |
| 8164696 | ---          | ---        | ---                                 | -0.116 | 0.923 | 2.49E-01 | 2.49E+01 |  |
| 8164698 | NM_004269    | MED27      | mediator complex subunit 27         | -0.012 | 0.992 | 9.76E-01 | 9.76E+01 |  |
| 8164701 | NM_015046    | SETX       | senataxin                           | 0.100  | 1.072 | 2.02E-01 | 2.02E+01 |  |
| 8164742 | NM_022779    | DDX31      | DEAD (Asp-Glu-Ala-Asp) box polyp    | -0.003 | 0.998 | 9.89E-01 | 9.89E+01 |  |
| 8164766 | NM_152572    | C9orf98    | chromosome 9 open reading fram      | -0.191 | 0.876 | 3.21E-02 | 3.21E+00 |  |
| 8164781 | NM_000368    | TSC1       | tuberous sclerosis 1                | 0.056  | 1.040 | 7.12E-01 | 7.12E+01 |  |
| 8164808 | ---          | ---        | ---                                 | -0.018 | 0.988 | 9.27E-01 | 9.27E+01 |  |
| 8164810 | NM_006266    | RALGDS     | ral guanine nucleotide dissociator  | -0.033 | 0.978 | 8.74E-01 | 8.74E+01 |  |
| 8164833 | NM_021996    | GBGT1      | globoside alpha-1,3-N-acetylgalact  | 0.017  | 1.012 | 9.04E-01 | 9.04E+01 |  |
| 8164848 | ---          | ---        | ---                                 | 0.091  | 1.065 | 6.66E-01 | 6.66E+01 |  |
| 8164853 | NM_020469    | ABO        | ABO blood group (transferase A, a   | -0.108 | 0.928 | 1.71E-01 | 1.71E+01 |  |
| 8164862 | NM_006753    | SURF6      | surfeit 6                           | -0.066 | 0.955 | 5.53E-01 | 5.53E+01 |  |
| 8164870 | ---          | ---        | ---                                 | -0.006 | 0.996 | 9.87E-01 | 9.87E+01 |  |
| 8164872 | NM_181491    | MED22      | mediator complex subunit 22         | -0.033 | 0.977 | 8.67E-01 | 8.67E+01 |  |
| 8164883 | NM_033161    | SURF4      | surfeit 4                           | 0.028  | 1.019 | 9.12E-01 | 9.12E+01 |  |

|         |              |           |                                       |        |       |          |          |
|---------|--------------|-----------|---------------------------------------|--------|-------|----------|----------|
| 8164896 | NM_003172    | SURF1     | surfeit 1                             | -0.020 | 0.986 | 9.24E-01 | 9.24E+01 |
| 8164907 | NM_020385    | REXO4     | REX4, RNA exonuclease 4 homolog       | 0.060  | 1.042 | 7.45E-01 | 7.45E+01 |
| 8164918 | NM_017585    | SLC2A6    | solute carrier family 2 (facilitated) | -0.016 | 0.989 | 9.41E-01 | 9.41E+01 |
| 8164931 | NM_00108048  | TMEM8C    | transmembrane protein 8C              | -0.020 | 0.986 | 8.89E-01 | 8.89E+01 |
| 8164937 | BC146946     | FAM163B   | family with sequence similarity 16    | -0.027 | 0.981 | 8.00E-01 | 8.00E+01 |
| 8164940 | NM_00113470  | SARDH     | sarcosine dehydrogenase               | 0.009  | 1.006 | 9.53E-01 | 9.53E+01 |
| 8164967 | NM_00113439  | VAV2      | vav 2 guanine nucleotide exchange     | -0.121 | 0.920 | 5.06E-01 | 5.06E+01 |
| 8164995 | NM_007371    | BRD3      | bromodomain containing 3              | -0.061 | 0.959 | 4.62E-01 | 4.62E+01 |
| 8165021 | ---          | ---       | ---                                   | -0.009 | 0.993 | 9.53E-01 | 9.53E+01 |
| 8165024 | NM_00104826  | C9orf116  | chromosome 9 open reading frame       | -0.066 | 0.955 | 5.67E-01 | 5.67E+01 |
| 8165038 | NM_00101241  | SOHLH1    | spermatogenesis and oogenesis sp      | -0.093 | 0.938 | 3.32E-01 | 3.32E+01 |
| 8165046 | NM_015447    | CAMSAP1   | calmodulin regulated spectrin-ass     | -0.043 | 0.971 | 8.15E-01 | 8.15E+01 |
| 8165064 | NM_016172    | UBAC1     | UBA domain containing 1               | 0.159  | 1.116 | 2.11E-02 | 2.11E+00 |
| 8165077 | NM_144653    | NACC2     | NACC family member 2, BEN and E       | 0.096  | 1.069 | 3.70E-01 | 3.70E+01 |
| 8165083 | NM_178138    | LHX3      | LIM homeobox 3                        | -0.003 | 0.998 | 9.85E-01 | 9.85E+01 |
| 8165094 | NM_181701    | QSOX2     | quiescin Q6 sulfhydryl oxidase 2      | 0.043  | 1.030 | 8.07E-01 | 8.07E+01 |
| 8165107 | NM_052813    | CARD9     | caspase recruitment domain famil      | -0.073 | 0.950 | 3.95E-01 | 3.95E+01 |
| 8165131 | NM_003086    | SNAPC4    | small nuclear RNA activating comp     | -0.026 | 0.982 | 8.31E-01 | 8.31E+01 |
| 8165156 | NM_00103970  | SDCCAG3   | serologically defined colon cancer    | -0.004 | 0.997 | 9.85E-01 | 9.85E+01 |
| 8165171 | NM_019892    | INPP5E    | inositol polyphosphate-5-phospha      | -0.051 | 0.965 | 5.89E-01 | 5.89E+01 |
| 8165183 | NM_014866    | SEC16A    | SEC16 homolog A (S. cerevisiae)       | -0.055 | 0.963 | 5.68E-01 | 5.68E+01 |
| 8165217 | NM_017617    | NOTCH1    | Notch homolog 1, translocation-as     | -0.080 | 0.946 | 4.21E-01 | 4.21E+01 |
| 8165255 | ---          | ---       | ---                                   | 0.009  | 1.006 | 9.54E-01 | 9.54E+01 |
| 8165258 | NM_006412    | AGPAT2    | 1-acylglycerol-3-phosphate O-acyl     | -0.010 | 0.993 | 9.55E-01 | 9.55E+01 |
| 8165271 | NM_00100171  | LCN10     | lipocalin 10                          | -0.028 | 0.981 | 8.89E-01 | 8.89E+01 |
| 8165277 | NM_198946    | LCN6      | lipocalin 6                           | 0.037  | 1.026 | 7.42E-01 | 7.42E+01 |
| 8165285 | NM_178469    | LCN8      | lipocalin 8                           | -0.059 | 0.960 | 7.38E-01 | 7.38E+01 |
| 8165295 | ENST00000392 | LCN8      | lipocalin 8                           | -0.130 | 0.914 | 2.78E-01 | 2.78E+01 |
| 8165309 | NM_003792    | EDF1      | endothelial differentiation-related   | -0.012 | 0.991 | 9.53E-01 | 9.53E+01 |
| 8165319 | NM_018998    | FBXW5     | F-box and WD repeat domain cont       | -0.040 | 0.973 | 7.52E-01 | 7.52E+01 |
| 8165334 | NM_004669    | CLIC3     | chloride intracellular channel 3      | -0.044 | 0.970 | 7.13E-01 | 7.13E+01 |
| 8165345 | NM_001606    | ABCA2     | ATP-binding cassette, sub-family A    | -0.113 | 0.925 | 1.44E-01 | 1.44E+01 |
| 8165398 | NM_004479    | FUT7      | fucosyltransferase 7 (alpha (1,3) fu  | 0.013  | 1.009 | 9.44E-01 | 9.44E+01 |
| 8165406 | NM_015392    | NPDC1     | neural proliferation, differentiat    | -0.035 | 0.976 | 7.78E-01 | 7.78E+01 |
| 8165416 | NM_203468    | ENTPD2    | ectonucleoside triphosphate diph      | -0.059 | 0.960 | 5.09E-01 | 5.09E+01 |
| 8165430 | NM_178448    | C9orf140  | chromosome 9 open reading frame       | 0.021  | 1.015 | 8.98E-01 | 8.98E+01 |
| 8165438 | NM_013379    | DPP7      | dipeptidyl-peptidase 7                | -0.051 | 0.966 | 5.56E-01 | 5.56E+01 |
| 8165453 | NM_00101365  | LRRC26    | leucine rich repeat containing 26     | -0.053 | 0.964 | 5.08E-01 | 5.08E+01 |
| 8165458 | ---          | ---       | ---                                   | 0.030  | 1.021 | 8.99E-01 | 8.99E+01 |
| 8165462 | NM_013366    | ANAPC2    | anaphase promoting complex sub        | -0.013 | 0.991 | 9.33E-01 | 9.33E+01 |
| 8165478 | NM_173691    | C9orf75   | chromosome 9 open reading frame       | 0.005  | 1.003 | 9.78E-01 | 9.78E+01 |
| 8165486 | NM_053045    | TMEM203   | transmembrane protein 203             | -0.023 | 0.984 | 8.77E-01 | 8.77E+01 |
| 8165492 | NM_031297    | RNF208    | ring finger protein 208               | -0.105 | 0.930 | 8.12E-02 | 8.12E+00 |
| 8165496 | NM_006088    | TUBB2C    | tubulin, beta 2C                      | -0.216 | 0.861 | 3.68E-01 | 3.68E+01 |
| 8165498 | NM_00100171  | FAM166A   | family with sequence similarity 16    | -0.046 | 0.969 | 6.68E-01 | 6.68E+01 |
| 8165508 | NM_00100435  | NRARP     | NOTCH-regulated ankyrin repeat p      | -0.014 | 0.990 | 9.30E-01 | 9.30E+01 |
| 8165512 | NM_017820    | EXD3      | exonuclease 3'-5' domain containi     | -0.051 | 0.966 | 4.91E-01 | 4.91E+01 |
| 8165538 | NM_00103311  | ENTPD8    | ectonucleoside triphosphate diph      | -0.017 | 0.988 | 9.06E-01 | 9.06E+01 |
| 8165552 | NM_00113096  | NELF      | nasal embryonic LHRH factor           | -0.011 | 0.993 | 9.61E-01 | 9.61E+01 |
| 8165575 | NM_00109853  | PNPLA7    | patatin-like phospholipase domain     | 0.003  | 1.002 | 9.84E-01 | 9.84E+01 |
| 8165610 | NM_138778    | WDR85     | WD repeat domain 85                   | -0.109 | 0.927 | 1.76E-01 | 1.76E+01 |
| 8165622 | NM_138462    | ZMYND19   | zinc finger, MYND-type containing     | -0.050 | 0.966 | 7.87E-01 | 7.87E+01 |
| 8165630 | NM_032937    | C9orf37   | chromosome 9 open reading frame       | -0.081 | 0.946 | 6.66E-01 | 6.66E+01 |
| 8165637 | NM_031297    | RNF208    | ring finger protein 208               | -0.105 | 0.930 | 8.12E-02 | 8.12E+00 |
| 8165639 | BC052297     | C9orf169  | chromosome 9 open reading frame       | 0.015  | 1.011 | 9.09E-01 | 9.09E+01 |
| 8165642 | NM_053045    | TMEM203   | transmembrane protein 203             | -0.031 | 0.979 | 9.10E-01 | 9.10E+01 |
| 8165644 | ---          | ---       | ---                                   | -0.061 | 0.959 | 5.48E-01 | 5.48E+01 |
| 8165646 | ---          | ---       | ---                                   | 0.114  | 1.082 | 9.00E-01 | 9.00E+01 |
| 8165648 | AK290098     | C7orf11   | chromosome 7 open reading frame       | -0.072 | 0.951 | 4.99E-01 | 4.99E+01 |
| 8165650 | ---          | ---       | ---                                   | 0.007  | 1.005 | 9.64E-01 | 9.64E+01 |
| 8165653 | AK293612     | HNRNPM    | heterogeneous nuclear ribonucleo      | -0.039 | 0.973 | 5.99E-01 | 5.99E+01 |
| 8165656 | ---          | ---       | ---                                   | -0.138 | 0.909 | 6.80E-01 | 6.80E+01 |
| 8165658 | U18810       | VIPR2     | vasoactive intestinal peptide rece    | 0.253  | 1.191 | 3.94E-01 | 3.94E+01 |
| 8165661 | ---          | ---       | ---                                   | 0.058  | 1.041 | 2.03E-01 | 2.03E+01 |
| 8165665 | ---          | ---       | ---                                   | -0.012 | 0.992 | 9.09E-01 | 9.09E+01 |
| 8165667 | ---          | ---       | ---                                   | -0.042 | 0.971 | 8.97E-01 | 8.97E+01 |
| 8165669 | A8064665     | LOC440552 | OK/SW-cl.16                           | -0.009 | 0.994 | 9.53E-01 | 9.53E+01 |
| 8165672 | L23320       | RFC1      | replication factor C (activator 1) 1  | 0.063  | 1.045 | 9.11E-01 | 9.11E+01 |
| 8165674 | AY423734     | SH3KBP1   | SH3-domain kinase binding protei      | -0.003 | 0.998 | 9.81E-01 | 9.81E+01 |
| 8165676 | ---          | ---       | ---                                   | 0.009  | 1.006 | 9.53E-01 | 9.53E+01 |
| 8165680 | ---          | ---       | ---                                   | 0.218  | 1.163 | 7.65E-01 | 7.65E+01 |
| 8165682 | ---          | ---       | ---                                   | 0.169  | 1.124 | 7.57E-01 | 7.57E+01 |
| 8165684 | ---          | ---       | ---                                   | 0.181  | 1.134 | 8.02E-01 | 8.02E+01 |
| 8165686 | ---          | ---       | ---                                   | -0.002 | 0.999 | 9.89E-01 | 9.89E+01 |
| 8165690 | ---          | ---       | ---                                   | -0.012 | 0.991 | 8.92E-01 | 8.92E+01 |
| 8165692 | ---          | ---       | ---                                   | -0.128 | 0.915 | 7.97E-01 | 7.97E+01 |
| 8165694 | ---          | ---       | ---                                   | 0.060  | 1.043 | 8.78E-01 | 8.78E+01 |

|         |              |            |                                      |        |       |          |          |  |  |
|---------|--------------|------------|--------------------------------------|--------|-------|----------|----------|--|--|
| 8165696 | ---          | ---        | ---                                  | 0.189  | 1.140 | 7.09E-01 | 7.09E+01 |  |  |
| 8165698 | ---          | ---        | ---                                  | 0.288  | 1.221 | 4.48E-01 | 4.48E+01 |  |  |
| 8165700 | ---          | ---        | ---                                  | 0.119  | 1.086 | 6.80E-01 | 6.80E+01 |  |  |
| 8165703 | AF284753     | UIMC1      | ubiquitin interaction motif contain  | 0.033  | 1.023 | 8.45E-01 | 8.45E+01 |  |  |
| 8165705 | ---          | ---        | ---                                  | 0.004  | 1.003 | 9.81E-01 | 9.81E+01 |  |  |
| 8165707 | BC028919     | TOB2       | transducer of ERBB2, 2               | 0.012  | 1.009 | 9.06E-01 | 9.06E+01 |  |  |
| 8165709 | ---          | ---        | ---                                  | -0.108 | 0.928 | 7.64E-01 | 7.64E+01 |  |  |
| 8165711 | NM_018390    | PLCXD1     | phosphatidylinositol-specific phos   | 0.053  | 1.038 | 7.53E-01 | 7.53E+01 |  |  |
| 8165735 | NM_00116153  | CSF2RA     | colony stimulating factor 2 recept   | -0.194 | 0.874 | 4.61E-01 | 4.61E+01 |  |  |
| 8165752 | NM_002183    | IL3RA      | interleukin 3 receptor, alpha (low   | -0.283 | 0.822 | 6.30E-01 | 6.30E+01 |  |  |
| 8165765 | NR_026711    | NCRNA00105 | non-protein coding RNA 105           | -0.056 | 0.962 | 6.64E-01 | 6.64E+01 |  |  |
| 8165773 | NR_027383    | SFRS17A    | splicing factor, arginine/serine-ric | -0.023 | 0.984 | 9.06E-01 | 9.06E+01 |  |  |
| 8165794 | NM_002414    | CD99       | CD99 molecule                        | -0.049 | 0.967 | 7.94E-01 | 7.94E+01 |  |  |
| 8165808 | NM_00114191  | XG         | Xg blood group                       | -0.013 | 0.991 | 9.49E-01 | 9.49E+01 |  |  |
| 8165833 | NM_00101171  | ARSH       | arylsulfatase family, member H       | -0.010 | 0.993 | 9.55E-01 | 9.55E+01 |  |  |
| 8165856 | ---          | ---        | ---                                  | -0.080 | 0.946 | 9.33E-01 | 9.33E+01 |  |  |
| 8165881 | NM_013452    | VCX        | variable charge, X-linked            | -0.008 | 0.994 | 9.53E-01 | 9.53E+01 |  |  |
| 8165890 | NM_00100188  | VCX3B      | variable charge, X-linked 3B         | 0.010  | 1.007 | 9.44E-01 | 9.44E+01 |  |  |
| 8165903 | ---          | ---        | ---                                  | 0.067  | 1.047 | 5.78E-01 | 5.78E+01 |  |  |
| 8165911 | NM_005647    | TBL1X      | transducin (beta)-like 1X-linked     | -0.003 | 0.998 | 9.88E-01 | 9.88E+01 |  |  |
| 8165947 | NM_015691    | WWC3       | WWC family member 3                  | 0.058  | 1.041 | 6.95E-01 | 6.95E+01 |  |  |
| 8165995 | NM_005333    | HCCS       | holocytochrome c synthase (cytoc     | 0.115  | 1.083 | 3.27E-01 | 3.27E+01 |  |  |
| 8166015 | NM_006800    | MSL3       | male-specific lethal 3 homolog (Dr   | -0.033 | 0.977 | 8.98E-01 | 8.98E+01 |  |  |
| 8166049 | NM_00103909  | PRPS2      | phosphoribosyl pyrophosphate sy      | 0.152  | 1.111 | 1.67E-01 | 1.67E+01 |  |  |
| 8166065 | NM_138636    | TLR8       | tolllike receptor 8                  | 0.834  | 1.783 | 6.64E-02 | 6.64E+00 |  |  |
| 8166072 | NM_021109    | TMSB4X     | thymosin beta 4, X-linked            | -0.016 | 0.989 | 8.44E-01 | 8.44E+01 |  |  |
| 8166098 | NM_004251    | RAB9A      | RAB9A, member RAS oncogene fa        | -0.013 | 0.991 | 9.61E-01 | 9.61E+01 |  |  |
| 8166104 | NM_003611    | OFD1       | oral-facial-digital syndrome 1       | 0.017  | 1.012 | 9.49E-01 | 9.49E+01 |  |  |
| 8166124 | NM_006357    | UBE2E3     | ubiquitin-conjugating enzyme E2E     | -0.027 | 0.982 | 8.63E-01 | 8.63E+01 |  |  |
| 8166179 | NR_026551    | CA5BP      | carbonic anhydrase VB pseudogen      | -0.053 | 0.964 | 7.69E-01 | 7.69E+01 |  |  |
| 8166184 | NM_007220    | CA5B       | carbonic anhydrase VB, mitochon      | 0.050  | 1.035 | 8.44E-01 | 8.44E+01 |  |  |
| 8166195 | NM_005089    | ZRSR2      | zinc finger (CCCH type), RNA-bind    | -0.017 | 0.989 | 9.51E-01 | 9.51E+01 |  |  |
| 8166219 | NM_032796    | SYAP1      | synapse associated protein 1, SAP    | -0.048 | 0.967 | 8.05E-01 | 8.05E+01 |  |  |
| 8166230 | NM_018360    | CXorf15    | chromosome X open reading fram       | -0.121 | 0.919 | 5.09E-01 | 5.09E+01 |  |  |
| 8166243 | NM_004726    | REPS2      | RALBP1 associated Eps domain co      | 0.153  | 1.112 | 2.16E-01 | 2.16E+01 |  |  |
| 8166264 | ---          | ---        | ---                                  | -0.019 | 0.987 | 9.56E-01 | 9.56E+01 |  |  |
| 8166266 | NM_198270    | NHS        | Nance-Horan syndrome (congenit       | -0.003 | 0.998 | 9.84E-01 | 9.84E+01 |  |  |
| 8166335 | NM_000284    | PDHA1      | pyruvate dehydrogenase (lipoam       | 0.043  | 1.030 | 7.45E-01 | 7.45E+01 |  |  |
| 8166351 | ---          | ---        | ---                                  | 0.067  | 1.048 | 6.93E-01 | 6.93E+01 |  |  |
| 8166355 | NM_014927    | CNKSR2     | connector enhancer of kinase sup     | 0.063  | 1.045 | 7.67E-01 | 7.67E+01 |  |  |
| 8166402 | NM_004595    | SMS        | spermine synthase                    | -0.199 | 0.871 | 3.42E-02 | 3.42E+00 |  |  |
| 8166442 | NM_014888    | FAM3C      | family with sequence similarity 3,   | 0.179  | 1.132 | 4.06E-02 | 4.06E+00 |  |  |
| 8166455 | NM_006406    | PRDX4      | peroxiredoxin 4                      | 0.166  | 1.122 | 2.78E-01 | 2.78E+01 |  |  |
| 8166469 | NR_027783    | SAT1       | spermidine/spermine N1-acetyltr      | 0.156  | 1.114 | 5.61E-01 | 5.61E+01 |  |  |
| 8166493 | NM_001415    | EIF253     | eukaryotic translation initiation fa | 0.029  | 1.020 | 8.80E-01 | 8.80E+01 |  |  |
| 8166500 | NM_003410    | ZFX        | zinc finger protein, X-linked        | 0.001  | 1.001 | 9.97E-01 | 9.97E+01 |  |  |
| 8166511 | NM_005391    | PDK3       | pyruvate dehydrogenase kinase, is    | -0.081 | 0.946 | 7.11E-01 | 7.11E+01 |  |  |
| 8166525 | NM_016937    | POLA1      | polymerease (DNA directed), alpha    | 0.060  | 1.042 | 7.56E-01 | 7.56E+01 |  |  |
| 8166569 | ---          | ---        | ---                                  | -0.066 | 0.955 | 7.22E-01 | 7.22E+01 |  |  |
| 8166580 | ---          | ---        | ---                                  | -0.046 | 0.969 | 7.89E-01 | 7.89E+01 |  |  |
| 8166585 | AK057304     | FLJ32742   | hypothetical locus FLJ32742          | -0.040 | 0.972 | 9.24E-01 | 9.24E+01 |  |  |
| 8166607 | ---          | ---        | ---                                  | 0.146  | 1.107 | 6.37E-01 | 6.37E+01 |  |  |
| 8166613 | NM_002365    | MAGEB3     | melanoma antigen family B, 3         | 0.019  | 1.014 | 9.12E-01 | 9.12E+01 |  |  |
| 8166630 | ENST00000378 | LOC652904  | CDC28 protein kinase regulatory s    | -0.016 | 0.989 | 9.34E-01 | 9.34E+01 |  |  |
| 8166632 | NM_00112812  | GK         | glycerol kinase                      | -0.066 | 0.955 | 9.16E-01 | 9.16E+01 |  |  |
| 8166661 | ---          | ---        | ---                                  | -0.049 | 0.967 | 7.94E-01 | 7.94E+01 |  |  |
| 8166703 | NM_00101373  | FAM47C     | family with sequence similarity 47   | -0.026 | 0.982 | 8.68E-01 | 8.68E+01 |  |  |
| 8166712 | ---          | ---        | ---                                  | -0.032 | 0.978 | 7.94E-01 | 7.94E+01 |  |  |
| 8166797 | NM_021242    | MID1IP1    | MID1 interacting protein 1 (gastu    | 0.027  | 1.019 | 8.82E-01 | 8.82E+01 |  |  |
| 8166817 | ---          | ---        | ---                                  | -0.099 | 0.934 | 5.01E-01 | 5.01E+01 |  |  |
| 8166819 | ---          | ---        | ---                                  | -0.033 | 0.977 | 7.98E-01 | 7.98E+01 |  |  |
| 8166826 | NM_00103959  | USP9X      | ubiquitin specific peptidase 9, X-li | 0.004  | 1.003 | 9.85E-01 | 9.85E+01 |  |  |
| 8166872 | ---          | ---        | ---                                  | -0.071 | 0.952 | 7.15E-01 | 7.15E+01 |  |  |
| 8166876 | NM_001356    | DDX3X      | DEAD (Asp-Glu-Ala-Asp) box polyp     | -0.032 | 0.978 | 8.69E-01 | 8.69E+01 |  |  |
| 8166899 | NM_022567    | NYX        | nyctalopin                           | -0.046 | 0.968 | 6.23E-01 | 6.23E+01 |  |  |
| 8166925 | NM_000240    | MAOA       | monoamine oxidase A                  | -0.140 | 0.908 | 6.18E-01 | 6.18E+01 |  |  |
| 8166948 | ---          | ---        | ---                                  | -0.078 | 0.947 | 7.73E-01 | 7.73E+01 |  |  |
| 8166956 | NM_021140    | KDM6A      | lysine (K)-specific demethylase 6A   | -0.023 | 0.984 | 9.51E-01 | 9.51E+01 |  |  |
| 8166989 | NM_00112989  | ZNF673     | zinc finger family member 673        | -0.035 | 0.976 | 9.00E-01 | 9.00E+01 |  |  |
| 8166999 | NM_019886    | CHST7      | carbohydrate (N-acetylglucosamin     | 0.038  | 1.027 | 7.75E-01 | 7.75E+01 |  |  |
| 8167006 | NM_006915    | RP2        | retinitis pigmentosa 2 (X-linked re  | 0.141  | 1.103 | 5.99E-01 | 5.99E+01 |  |  |
| 8167013 | NM_014735    | PHF16      | PHD finger protein 16                | -0.105 | 0.930 | 5.86E-01 | 5.86E+01 |  |  |
| 8167040 | NR_000041    | RNU12      | RNA, U12 small nuclear               | -0.036 | 0.975 | 8.49E-01 | 8.49E+01 |  |  |
| 8167042 | NM_005676    | RBM10      | RNA binding motif protein 10         | -0.129 | 0.914 | 1.24E-01 | 1.24E+01 |  |  |
| 8167069 | NM_003334    | UBA1       | ubiquitin-like modifier activating e | -0.100 | 0.933 | 4.50E-01 | 4.50E+01 |  |  |
| 8167099 | NR_024616    | INE1       | inactivation escape 1 (non-protein   | -0.063 | 0.957 | 8.44E-01 | 8.44E+01 |  |  |
| 8167103 | NM_006201    | PCTK1      | PCTAIRE protein kinase 1             | -0.070 | 0.952 | 6.89E-01 | 6.89E+01 |  |  |



|         |              |           |                                               |        |       |          |          |  |
|---------|--------------|-----------|-----------------------------------------------|--------|-------|----------|----------|--|
| 8167125 | NM_004651    | USP11     | ubiquitin specific peptidase 11               | -0.048 | 0.967 | 6.51E-01 | 6.51E+01 |  |
| 8167150 | ---          | ---       | ---                                           | 0.027  | 1.019 | 9.29E-01 | 9.29E+01 |  |
| 8167161 | ---          | ---       | ---                                           | 0.123  | 1.089 | 6.45E-01 | 6.45E+01 |  |
| 8167163 | ENST00000357 | CXorf24   | chromosome X open reading frame               | -0.146 | 0.903 | 5.75E-01 | 5.75E+01 |  |
| 8167165 | NM_001654    | ARAF      | v-raf murine sarcoma 3611 viral oncogene      | -0.055 | 0.963 | 6.76E-01 | 6.76E+01 |  |
| 8167185 | NM_003254    | TIMP1     | TIMP metalloproteinase inhibitor 1            | 0.052  | 1.036 | 9.47E-01 | 9.47E+01 |  |
| 8167201 | NM_007137    | ZNF81     | zinc finger protein 81                        | 0.022  | 1.015 | 9.19E-01 | 9.19E+01 |  |
| 8167210 | NM_205856    | SPACA5    | sperm acrosome associated 5                   | -0.024 | 0.984 | 8.97E-01 | 8.97E+01 |  |
| 8167228 | NM_205856    | SPACA5    | sperm acrosome associated 5                   | -0.063 | 0.958 | 6.67E-01 | 6.67E+01 |  |
| 8167234 | NM_006743    | RBM3      | RNA binding motif (RNP1, RRM) protein         | 0.028  | 1.020 | 9.00E-01 | 9.00E+01 |  |
| 8167270 | NM_177439    | FTSJ1     | FtsJ homolog 1 (E. coli)                      | 0.005  | 1.004 | 9.78E-01 | 9.78E+01 |  |
| 8167287 | NM_022825    | PORCN     | porcupine homolog (Drosophila)                | -0.101 | 0.932 | 4.18E-01 | 4.18E+01 |  |
| 8167305 | NM_006579    | EBP       | emopamil binding protein (sterol binding)     | 0.025  | 1.018 | 9.49E-01 | 9.49E+01 |  |
| 8167314 | NM_002536    | TBC1D25   | TBC1 domain family, member 25                 | -0.048 | 0.968 | 7.77E-01 | 7.77E+01 |  |
| 8167322 | NM_017883    | WDR13     | WD repeat domain 13                           | 0.008  | 1.006 | 9.66E-01 | 9.66E+01 |  |
| 8167334 | NM_000377    | WAS       | Wiskott-Aldrich syndrome (eczema)             | 0.055  | 1.039 | 6.57E-01 | 6.57E+01 |  |
| 8167347 | NM_003173    | SUV39H1   | suppressor of variegation 3-9 homolog         | -0.027 | 0.981 | 8.87E-01 | 8.87E+01 |  |
| 8167360 | NM_002049    | GATA1     | GATA binding protein 1 (globin transcription) | -0.012 | 0.992 | 9.53E-01 | 9.53E+01 |  |
| 8167369 | NM_006044    | HDAC6     | histone deacetylase 6                         | -0.039 | 0.973 | 7.17E-01 | 7.17E+01 |  |
| 8167407 | NM_181532    | ERAS      | ES cell expressed Ras                         | 0.067  | 1.047 | 3.83E-01 | 3.83E+01 |  |
| 8167412 | NM_005710    | PQBP1     | polyglutamine binding protein 1               | -0.051 | 0.965 | 7.45E-01 | 7.45E+01 |  |
| 8167430 | NM_033626    | CCDC120   | coiled-coil domain containing 120             | -0.031 | 0.978 | 7.49E-01 | 7.49E+01 |  |
| 8167457 | NM_014008    | CCDC22    | coiled-coil domain containing 22              | -0.012 | 0.991 | 9.28E-01 | 9.28E+01 |  |
| 8167476 | NM_033215    | PPP1R3F   | protein phosphatase 1, regulatory             | -0.098 | 0.935 | 1.27E-01 | 1.27E+01 |  |
| 8167573 | NM_00112734  | GAGE12B   | G antigen 12B                                 | -0.070 | 0.953 | 6.46E-01 | 6.46E+01 |  |
| 8167575 | NM_00112734  | GAGE12B   | G antigen 12B                                 | -0.037 | 0.974 | 8.72E-01 | 8.72E+01 |  |
| 8167601 | NM_00114507  | USP27X    | ubiquitin specific peptidase 27, X-linked     | -0.017 | 0.988 | 9.53E-01 | 9.53E+01 |  |
| 8167603 | NM_00112789  | CLCN5     | chloride channel 5                            | 0.192  | 1.142 | 2.29E-01 | 2.29E+01 |  |
| 8167623 | ---          | ---       | ---                                           | 0.040  | 1.028 | 7.77E-01 | 7.77E+01 |  |
| 8167645 | NM_153183    | NUDT10    | nudix (nucleoside diphosphate linked)         | -0.101 | 0.932 | 1.90E-01 | 1.90E+01 |  |
| 8167650 | BC046248     | CXorf67   | chromosome X open reading frame               | -0.037 | 0.975 | 8.24E-01 | 8.24E+01 |  |
| 8167652 | AY730278     | LOC389857 | hypothetical protein                          | -0.027 | 0.982 | 8.61E-01 | 8.61E+01 |  |
| 8167654 | NM_018094    | GSPT2     | G1 to S phase transition 2                    | 0.061  | 1.043 | 6.54E-01 | 6.54E+01 |  |
| 8167656 | NM_00100533  | MAGED1    | melanoma antigen family D, 1                  | 0.012  | 1.008 | 9.58E-01 | 9.58E+01 |  |
| 8167673 | NM_00109880  | MAGED4    | melanoma antigen family D, 4                  | -0.102 | 0.932 | 1.35E-01 | 1.35E+01 |  |
| 8167749 | NM_014138    | FAM156A   | family with sequence similarity 15            | 0.302  | 1.233 | 2.32E-02 | 2.32E+00 |  |
| 8167758 | NM_018969    | GPR173    | G protein-coupled receptor 173                | -0.001 | 0.999 | 9.93E-01 | 9.93E+01 |  |
| 8167763 | NM_022117    | TSPYL2    | TSPY-like 2                                   | -0.315 | 0.804 | 2.40E-03 | 2.40E+01 |  |
| 8167774 | NM_00103174  | RIBC1     | RIB43A domain with coiled-coils 1             | 0.005  | 1.003 | 9.85E-01 | 9.85E+01 |  |
| 8167786 | ---          | ---       | ---                                           | -0.112 | 0.925 | 4.40E-01 | 4.40E+01 |  |
| 8167790 | NM_058163    | TSR2      | TSR2, 20S rRNA accumulation, hor              | -0.065 | 0.956 | 5.86E-01 | 5.86E+01 |  |
| 8167797 | NM_019067    | GNL3L     | guanine nucleotide binding protein            | 0.127  | 1.092 | 1.58E-01 | 1.58E+01 |  |
| 8167815 | NM_014599    | MAGED2    | melanoma antigen family D, 2                  | -0.110 | 0.927 | 2.94E-01 | 2.94E+01 |  |
| 8167835 | NM_00103970  | TRO       | trophinin                                     | -0.114 | 0.924 | 3.90E-01 | 3.90E+01 |  |
| 8167854 | NM_014481    | APEX2     | APEX nuclease (apurinic/apyrimidic)           | 0.011  | 1.007 | 9.49E-01 | 9.49E+01 |  |
| 8167862 | NM_00101503  | PAGE2B    | P antigen family, member 2B                   | 0.004  | 1.002 | 9.93E-01 | 9.93E+01 |  |
| 8167880 | NM_130467    | PAGE5     | P antigen family, member 5 (prostate)         | -0.018 | 0.988 | 9.24E-01 | 9.24E+01 |  |
| 8167887 | NM_014061    | MAGEH1    | melanoma antigen family H, 1                  | 0.082  | 1.058 | 6.39E-01 | 6.39E+01 |  |
| 8167893 | ---          | ---       | ---                                           | -0.005 | 0.997 | 9.84E-01 | 9.84E+01 |  |
| 8167897 | NM_016656    | RRAGB     | Ras-related GTP binding B                     | 0.015  | 1.010 | 9.53E-01 | 9.53E+01 |  |
| 8167912 | NM_007250    | KLF8      | Kruppel-like factor 8                         | 0.063  | 1.045 | 7.60E-01 | 7.60E+01 |  |
| 8167924 | NM_013444    | UBQLN2    | ubiquilin 2                                   | 0.009  | 1.006 | 9.57E-01 | 9.57E+01 |  |
| 8167930 | NM_174912    | FAAH2     | fatty acid amide hydrolase 2                  | -0.346 | 0.787 | 1.53E-01 | 1.53E+01 |  |
| 8167942 | NM_007157    | ZXDB      | zinc finger, X-linked, duplicated B           | -0.139 | 0.908 | 3.47E-01 | 3.47E+01 |  |
| 8167965 | NM_002444    | MSN       | moesin                                        | -0.033 | 0.977 | 8.29E-01 | 8.29E+01 |  |
| 8168018 | NM_173834    | YIPF6     | Yip1 domain family, member 6                  | -0.015 | 0.990 | 9.62E-01 | 9.62E+01 |  |
| 8168028 | NM_00114250  | STARD8    | StAR-related lipid transfer (START)           | -0.026 | 0.982 | 8.96E-01 | 8.96E+01 |  |
| 8168045 | NM_004429    | EFNB1     | ephrin-B1                                     | -0.040 | 0.973 | 7.54E-01 | 7.54E+01 |  |
| 8168058 | NM_015686    | FAM155B   | family with sequence similarity 15            | -0.011 | 0.993 | 9.47E-01 | 9.47E+01 |  |
| 8168079 | ---          | ---       | ---                                           | -0.150 | 0.902 | 7.85E-01 | 7.85E+01 |  |
| 8168083 | NM_207320    | OTUD6A    | OTU domain containing 6A                      | -0.092 | 0.938 | 3.85E-01 | 3.85E+01 |  |
| 8168087 | NM_001551    | IGBP1     | immunoglobulin (CD79A) binding                | -0.022 | 0.985 | 9.09E-01 | 9.09E+01 |  |
| 8168115 | ---          | ---       | ---                                           | -0.039 | 0.973 | 8.18E-01 | 8.18E+01 |  |
| 8168179 | NM_021120    | DLG3      | discs, large homolog 3 (Drosophila)           | -0.042 | 0.971 | 8.86E-01 | 8.86E+01 |  |
| 8168205 | NM_005938    | FOXO4     | forkhead box O4                               | -0.058 | 0.961 | 7.30E-01 | 7.30E+01 |  |
| 8168215 | NM_005120    | MED12     | mediator complex subunit 12                   | -0.042 | 0.972 | 7.09E-01 | 7.09E+01 |  |
| 8168264 | NM_018977    | NLGN3     | neuroligin 3                                  | -0.039 | 0.973 | 7.54E-01 | 7.54E+01 |  |
| 8168274 | NM_000166    | GJB1      | gap junction protein, beta 1, 32kD            | 0.028  | 1.019 | 8.25E-01 | 8.25E+01 |  |
| 8168280 | NM_00114540  | NONO      | non-POU domain containing, octa               | 0.005  | 1.003 | 9.80E-01 | 9.80E+01 |  |
| 8168303 | NM_004606    | TAF1      | TAF1 RNA polymerase II, TATA box              | -0.062 | 0.958 | 6.59E-01 | 6.59E+01 |  |
| 8168316 | NM_181672    | OGT       | O-linked N-acetylglucosamine (Glc             | 0.096  | 1.069 | 2.79E-01 | 2.79E+01 |  |
| 8168345 | NM_052957    | ACRC      | acidic repeat containing                      | -0.098 | 0.935 | 7.10E-01 | 7.10E+01 |  |
| 8168357 | NR_002309    | RPS26P11  | ribosomal protein S26 pseudogene              | -0.004 | 0.997 | 9.92E-01 | 9.92E+01 |  |
| 8168359 | NM_00101362  | NHSL2     | NHS-like 2                                    | 0.141  | 1.103 | 2.21E-01 | 2.21E+01 |  |
| 8168362 | AY572224     | FLJ44635  | TPT1-like protein                             | 0.127  | 1.092 | 6.77E-02 | 6.77E+00 |  |
| 8168366 | NM_006223    | PIN4      | protein (peptidyl)prolyl cis/trans is         | -0.112 | 0.925 | 6.68E-01 | 6.68E+01 |  |
| 8168373 | ---          | ---       | ---                                           | -0.005 | 0.997 | 9.80E-01 | 9.80E+01 |  |

|         |              |           |                                     |        |       |          |          |  |  |
|---------|--------------|-----------|-------------------------------------|--------|-------|----------|----------|--|--|
| 8168375 | NM_033053    | DMRTC1    | DMRT-like family C1                 | -0.020 | 0.986 | 8.69E-01 | 8.69E+01 |  |  |
| 8168387 | NR_026594    | CXorf50B  | chromosome X open reading fram      | -0.031 | 0.979 | 8.72E-01 | 8.72E+01 |  |  |
| 8168391 | NR_026594    | CXorf50B  | chromosome X open reading fram      | -0.035 | 0.976 | 9.01E-01 | 9.01E+01 |  |  |
| 8168393 | NM_00104250  | PABPC1L2B | poly(A) binding protein, cytoplasm  | -0.088 | 0.941 | 2.29E-01 | 2.29E+01 |  |  |
| 8168399 | NM_00103984  | CHIC1     | cysteine-rich hydrophobic domain    | -0.015 | 0.990 | 9.56E-01 | 9.56E+01 |  |  |
| 8168416 | NM_032747    | USMG5     | up-regulated during skeletal musc   | -0.059 | 0.960 | 6.57E-01 | 6.57E+01 |  |  |
| 8168424 | NM_006517    | SLC16A2   | solute carrier family 16, member 2  | -0.068 | 0.954 | 5.56E-01 | 5.56E+01 |  |  |
| 8168432 | AF086467     | RLIM      | ring finger protein, LIM domain int | 0.071  | 1.050 | 6.06E-01 | 6.06E+01 |  |  |
| 8168438 | NM_145052    | UPRT      | uracil phosphoribosyltransferase (  | 0.120  | 1.087 | 2.94E-01 | 2.94E+01 |  |  |
| 8168447 | BC001220     | CXorf26   | chromosome X open reading fram      | 0.064  | 1.046 | 6.80E-01 | 6.80E+01 |  |  |
| 8168458 | NM_020932    | MAGEE1    | melanoma antigen family E, 1        | 0.004  | 1.003 | 9.86E-01 | 9.86E+01 |  |  |
| 8168466 | NM_032121    | MAGT1     | magnesium transporter 1             | 0.267  | 1.203 | 4.96E-02 | 4.96E+00 |  |  |
| 8168470 | NM_001866    | COX7B     | cytochrome c oxidase subunit VIIb   | 0.144  | 1.105 | 5.74E-01 | 5.74E+01 |  |  |
| 8168472 | NM_000052    | ATP7A     | ATPase, Cu++ transporting, alpha    | 0.073  | 1.052 | 6.14E-01 | 6.14E+01 |  |  |
| 8168500 | NM_000291    | PGK1      | phosphoglycerate kinase 1           | -0.066 | 0.955 | 5.99E-01 | 5.99E+01 |  |  |
| 8168524 | NM_014499    | P2RY10    | purinergic receptor P2Y, G-protein  | -0.093 | 0.938 | 6.32E-01 | 6.32E+01 |  |  |
| 8168531 | NM_032553    | GPR174    | G protein-coupled receptor 174      | -0.029 | 0.980 | 9.29E-01 | 9.29E+01 |  |  |
| 8168557 | NM_003022    | SH3BGR1   | SH3 domain binding glutamic acid    | 0.218  | 1.163 | 3.99E-02 | 3.99E+00 |  |  |
| 8168567 | NM_000307    | POU3F4    | POU class 3 homeobox 4              | 0.027  | 1.019 | 8.45E-01 | 8.45E+01 |  |  |
| 8168578 | NR_024062    | UBE2DNL   | ubiquitin-conjugating enzyme E2D    | -0.044 | 0.970 | 7.43E-01 | 7.43E+01 |  |  |
| 8168580 | NM_198450    | APOOL     | apolipoprotein O-like               | 0.108  | 1.078 | 6.47E-01 | 6.47E+01 |  |  |
| 8168602 | ---          | ---       | ---                                 | 0.052  | 1.037 | 8.58E-01 | 8.58E+01 |  |  |
| 8168604 | NM_053281    | DACH2     | dachshund homolog 2 (Drosophila     | -0.046 | 0.969 | 6.59E-01 | 6.59E+01 |  |  |
| 8168644 | ---          | ---       | ---                                 | 0.086  | 1.061 | 7.01E-01 | 7.01E+01 |  |  |
| 8168674 | ---          | ---       | ---                                 | 0.268  | 1.204 | 2.46E-01 | 2.46E+01 |  |  |
| 8168691 | NM_006729    | DIAPH2    | diaphanous homolog 2 (Drosophila    | 0.156  | 1.114 | 2.81E-01 | 2.81E+01 |  |  |
| 8168723 | NM_013347    | RPA4      | replication protein A4, 34kDa       | 0.132  | 1.096 | 4.16E-01 | 4.16E+01 |  |  |
| 8168727 | ---          | ---       | ---                                 | 0.299  | 1.230 | 8.44E-02 | 8.44E+00 |  |  |
| 8168762 | NM_001325    | CSTF2     | cleavage stimulation factor, 3' pre | -0.012 | 0.991 | 9.66E-01 | 9.66E+01 |  |  |
| 8168779 | ---          | ---       | ---                                 | 0.052  | 1.036 | 7.71E-01 | 7.71E+01 |  |  |
| 8168790 | NM_021637    | TMEM35    | transmembrane protein 35            | 0.013  | 1.009 | 9.44E-01 | 9.44E+01 |  |  |
| 8168843 | NM_021029    | RPL36A    | ribosomal protein L36a              | -0.010 | 0.993 | 9.62E-01 | 9.62E+01 |  |  |
| 8168852 | NM_019597    | HNRNP2    | heterogeneous nuclear ribonucleo    | -0.027 | 0.982 | 9.12E-01 | 9.12E+01 |  |  |
| 8168873 | NM_019007    | ARMCX6    | armadillo repeat containing, X-link | -0.105 | 0.930 | 7.94E-01 | 7.94E+01 |  |  |
| 8168875 | NM_016607    | ARMCX3    | armadillo repeat containing, X-link | -0.021 | 0.986 | 9.07E-01 | 9.07E+01 |  |  |
| 8168892 | NM_080390    | TCEAL2    | transcription elongation factor A ( | -0.059 | 0.960 | 7.12E-01 | 7.12E+01 |  |  |
| 8168958 | NM_022838    | ARMCX5    | armadillo repeat containing, X-link | 0.044  | 1.031 | 7.71E-01 | 7.71E+01 |  |  |
| 8168968 | NM_014710    | GPRASP1   | G protein-coupled receptor associ   | 0.006  | 1.004 | 9.86E-01 | 9.86E+01 |  |  |
| 8168976 | NM_00100405  | GPRASP2   | G protein-coupled receptor associ   | 0.000  | 1.000 | 1.00E+00 | 1.00E+02 |  |  |
| 8169000 | ---          | ---       | ---                                 | 0.337  | 1.263 | 3.41E-01 | 3.41E+01 |  |  |
| 8169006 | NM_00103183  | RAB40A    | RAB40A, member RAS oncogene f       | 0.021  | 1.015 | 9.24E-01 | 9.24E+01 |  |  |
| 8169009 | NM_00108042  | BEX4      | brain expressed, X-linked 4         | 0.013  | 1.009 | 9.72E-01 | 9.72E+01 |  |  |
| 8169028 | NM_206917    | NGFRAP1   | nerve growth factor receptor (TNF   | 0.100  | 1.071 | 6.91E-01 | 6.91E+01 |  |  |
| 8169035 | NM_024863    | TCEAL4    | transcription elongation factor A ( | -0.038 | 0.974 | 7.78E-01 | 7.78E+01 |  |  |
| 8169044 | NM_00100693  | TCEAL3    | transcription elongation factor A ( | 0.055  | 1.039 | 7.99E-01 | 7.99E+01 |  |  |
| 8169049 | NM_004780    | TCEAL1    | transcription elongation factor A ( | 0.073  | 1.052 | 7.13E-01 | 7.13E+01 |  |  |
| 8169073 | NM_194324    | TMSB15B   | thymosin beta 15B                   | 0.036  | 1.025 | 9.01E-01 | 9.01E+01 |  |  |
| 8169080 | ENST00000243 | H2BFM     | H2B histone family, member M        | -0.063 | 0.957 | 4.31E-01 | 4.31E+01 |  |  |
| 8169085 | NM_207318    | CXorf39   | chromosome X open reading fram      | 0.039  | 1.027 | 6.20E-01 | 6.20E+01 |  |  |
| 8169233 | ---          | ---       | ---                                 | -0.163 | 0.893 | 6.10E-01 | 6.10E+01 |  |  |
| 8169235 | ENST00000276 | FRMPD3    | FERM and PDZ domain containing      | -0.051 | 0.965 | 8.35E-01 | 8.35E+01 |  |  |
| 8169240 | NM_002764    | PRPS1     | phosphoribosyl pyrophosphate sy     | 0.035  | 1.025 | 8.95E-01 | 8.95E+01 |  |  |
| 8169350 | ---          | ---       | ---                                 | -0.013 | 0.991 | 9.12E-01 | 9.12E+01 |  |  |
| 8169352 | NM_018698    | NXT2      | nuclear transport factor 2-like exp | 0.104  | 1.074 | 4.86E-01 | 4.86E+01 |  |  |
| 8169361 | ---          | ---       | ---                                 | 0.003  | 1.002 | 9.92E-01 | 9.92E+01 |  |  |
| 8169365 | NM_032227    | TMEM164   | transmembrane protein 164           | -0.054 | 0.963 | 7.67E-01 | 7.67E+01 |  |  |
| 8169419 | BC117377     | ALG13     | asparagine-linked glycosylation 13  | 0.075  | 1.054 | 5.98E-01 | 5.98E+01 |  |  |
| 8169443 | ---          | ---       | ---                                 | -0.059 | 0.960 | 6.80E-01 | 6.80E+01 |  |  |
| 8169459 | NR_002993    | SNORA35   | small nucleolar RNA, H/ACA box 3    | 0.060  | 1.043 | 6.97E-01 | 6.97E+01 |  |  |
| 8169465 | ---          | ---       | ---                                 | -0.078 | 0.947 | 4.19E-01 | 4.19E+01 |  |  |
| 8169519 | NM_019045    | WDR44     | WD repeat domain 44                 | -0.020 | 0.986 | 9.13E-01 | 9.13E+01 |  |  |
| 8169541 | NM_144658    | DOCK11    | dedicator of cytokinesis 11         | 0.130  | 1.095 | 1.35E-01 | 1.35E+01 |  |  |
| 8169580 | NM_001560    | IL13RA1   | interleukin 13 receptor, alpha 1    | 0.269  | 1.205 | 4.81E-01 | 4.81E+01 |  |  |
| 8169603 | NM_00103185  | LONRF3    | LON peptidase N-terminal domain     | 0.021  | 1.014 | 9.28E-01 | 9.28E+01 |  |  |
| 8169617 | NM_006667    | PGRMC1    | progesterone receptor membrane      | 0.033  | 1.023 | 9.12E-01 | 9.12E+01 |  |  |
| 8169624 | NM_145305    | SLC25A43  | solute carrier family 25, member 4  | 0.116  | 1.084 | 1.50E-01 | 1.50E+01 |  |  |
| 8169638 | ---          | ---       | ---                                 | 0.179  | 1.132 | 8.04E-01 | 8.04E+01 |  |  |
| 8169640 | NM_001152    | SLC25A5   | solute carrier family 25 (mitochond | -0.016 | 0.989 | 9.18E-01 | 9.18E+01 |  |  |
| 8169645 | NM_003336    | UBE2A     | ubiquitin-conjugating enzyme E2A    | -0.013 | 0.991 | 9.56E-01 | 9.56E+01 |  |  |
| 8169657 | NM_00110557  | ANKRD58   | ankyrin repeat domain 58            | 0.039  | 1.027 | 7.59E-01 | 7.59E+01 |  |  |
| 8169659 | NM_004541    | NDUFA1    | NDH dehydrogenase (ubiquinone)      | 0.048  | 1.034 | 5.55E-01 | 5.55E+01 |  |  |
| 8169676 | NM_032498    | RHOXF2    | RhoX homeobox family, member 2      | -0.005 | 0.996 | 9.85E-01 | 9.85E+01 |  |  |
| 8169683 | NM_006777    | ZBTB33    | zinc finger and BTB domain contai   | 0.122  | 1.088 | 8.33E-02 | 8.33E+00 |  |  |
| 8169701 | NM_014060    | MCTS1     | malignant T cell amplified sequenc  | 0.119  | 1.086 | 1.59E-01 | 1.59E+01 |  |  |
| 8169709 | NM_016417    | GLRX5     | glutaredoxin 5                      | -0.106 | 0.929 | 5.98E-01 | 5.98E+01 |  |  |
| 8169740 | NM_002107    | H3F3A     | H3 histone, family 3A               | 0.114  | 1.082 | 1.86E-01 | 1.86E+01 |  |  |
| 8169742 | NM_001167    | XIAP      | X-linked inhibitor of apoptosis     | 0.155  | 1.114 | 6.34E-02 | 6.34E+00 |  |  |

|         |                               |                 |                                                     |        |       |          |          |  |
|---------|-------------------------------|-----------------|-----------------------------------------------------|--------|-------|----------|----------|--|
| 8169750 | NM_00104275                   | STAG2           | stromal antigen 2                                   | -0.054 | 0.964 | 5.79E-01 | 5.79E+01 |  |
| 8169792 | NM_002351                     | SH2D1A          | SH2 domain protein 1A                               | 0.015  | 1.010 | 9.70E-01 | 9.70E+01 |  |
| 8169806 | ---                           | ---             | ---                                                 | 0.078  | 1.056 | 5.35E-01 | 5.35E+01 |  |
| 8169811 | NM_000276                     | OCRL            | oculocerebrorenal syndrome of Lowe                  | 0.158  | 1.116 | 2.16E-01 | 2.16E+01 |  |
| 8169836 | NM_003399                     | XPNPEP2         | X-prolyl aminopeptidase (aminopeptidase)            | 0.054  | 1.038 | 6.83E-01 | 6.83E+01 |  |
| 8169859 | NM_018990                     | SASH3           | SAM and SH3 domain containing 3                     | 0.048  | 1.034 | 5.98E-01 | 5.98E+01 |  |
| 8169868 | NM_006649                     | UTP14A          | UTP14, U3 small nucleolar ribonucleoprotein         | 0.023  | 1.016 | 9.17E-01 | 9.17E+01 |  |
| 8169882 | NM_021946                     | BCORL1          | BCL6 co-repressor-like 1                            | -0.103 | 0.931 | 1.12E-01 | 1.12E+01 |  |
| 8169898 | NM_004794                     | RAB33A          | RAB33A, member RAS oncogene family                  | -0.075 | 0.950 | 5.51E-01 | 5.51E+01 |  |
| 8169904 | NM_003951                     | SLC25A14        | solute carrier family 25 (mitochondrial carrier)    | -0.124 | 0.918 | 3.91E-01 | 3.91E+01 |  |
| 8169920 | NM_016024                     | RBMX2           | RNA binding motif protein, X-linked                 | 0.048  | 1.034 | 7.87E-01 | 7.87E+01 |  |
| 8169928 | NR_027141                     | FAM45B          | family with sequence similarity 45                  | -0.216 | 0.861 | 2.04E-01 | 2.04E+01 |  |
| 8169949 | NM_016542                     | RP6-213H19.1    | serine/threonine protein kinase M                   | -0.105 | 0.930 | 4.69E-01 | 4.69E+01 |  |
| 8169984 | NM_000194                     | HPRT1           | hypoxanthine phosphoribosyltransferase              | 0.134  | 1.097 | 2.92E-01 | 2.92E+01 |  |
| 8169995 | AK295485                      | FAM122C         | family with sequence similarity 12                  | 0.041  | 1.029 | 8.62E-01 | 8.62E+01 |  |
| 8170009 | NM_00107817                   | FAM127A         | family with sequence similarity 12                  | 0.102  | 1.074 | 6.04E-01 | 6.04E+01 |  |
| 8170024 | NR_024359                     | NCRNA00086      | non-protein coding RNA 86                           | -0.016 | 0.989 | 9.27E-01 | 9.27E+01 |  |
| 8170027 | NM_182540                     | DDX26B          | DEAD/H (Asp-Glu-Ala-Asp/His) box protein            | 0.080  | 1.057 | 5.83E-01 | 5.83E+01 |  |
| 8170097 | NM_00104253                   | SLC9A6          | solute carrier family 9 (sodium/hydrogen exchanger) | 0.096  | 1.069 | 6.24E-01 | 6.24E+01 |  |
| 8170166 | NM_014500                     | HTATSF1         | HIV-1 Tat specific factor 1                         | -0.019 | 0.987 | 9.02E-01 | 9.02E+01 |  |
| 8170187 | NM_000074                     | CD40LG          | CD40 ligand                                         | 0.195  | 1.145 | 3.18E-01 | 3.18E+01 |  |
| 8170196 | ---                           | ---             | ---                                                 | 0.259  | 1.197 | 2.02E-01 | 2.02E+01 |  |
| 8170235 | ---                           | ---             | ---                                                 | 0.058  | 1.041 | 6.64E-01 | 6.64E+01 |  |
| 8170237 | ---                           | ---             | ---                                                 | -0.004 | 0.997 | 9.84E-01 | 9.84E+01 |  |
| 8170247 | AK093505                      | CXorf18         | chromosome X open reading frame                     | -0.037 | 0.974 | 7.97E-01 | 7.97E+01 |  |
| 8170298 | NM_00101298                   | UBE2NL // UBE2L | ubiquitin-conjugating enzyme E2N                    | 0.056  | 1.039 | 7.13E-01 | 7.13E+01 |  |
| 8170300 | ---                           | ---             | ---                                                 | 0.066  | 1.047 | 4.82E-01 | 4.82E+01 |  |
| 8170322 | NM_013275                     | ANKRD11         | ankyrin repeat domain 11                            | -0.052 | 0.965 | 6.61E-01 | 6.61E+01 |  |
| 8170326 | NM_002024                     | FMR1            | fragile X mental retardation 1                      | 0.029  | 1.020 | 7.48E-01 | 7.48E+01 |  |
| 8170353 | NM_152578                     | FMR1NB          | fragile X mental retardation 1 neighbor             | 0.020  | 1.014 | 8.94E-01 | 8.94E+01 |  |
| 8170360 | NM_002032                     | FTH1            | ferritin, heavy polypeptide 1                       | 0.004  | 1.003 | 9.81E-01 | 9.81E+01 |  |
| 8170364 | NM_002025                     | AFF2            | AF4/FMR2 family, member 2                           | -0.020 | 0.986 | 9.22E-01 | 9.22E+01 |  |
| 8170390 | NM_000202                     | IDS             | iduronate 2-sulfatase                               | -0.195 | 0.873 | 3.47E-02 | 3.47E+00 |  |
| 8170393 | NM_178124                     | CXorf40A        | chromosome X open reading frame                     | 0.083  | 1.059 | 2.65E-01 | 2.65E+01 |  |
| 8170400 | ENST00000432                  | FLJ16423        | hypothetical LOC642889                              | -0.002 | 0.999 | 9.92E-01 | 9.92E+01 |  |
| 8170402 | NM_016153                     | HSFX1           | heat shock transcription factor family              | -0.087 | 0.941 | 3.14E-01 | 3.14E+01 |  |
| 8170407 | NM_005365                     | MAGEA9          | melanoma antigen family A, 9                        | 0.045  | 1.032 | 6.80E-01 | 6.80E+01 |  |
| 8170412 | NM_005364                     | MAGEA8          | melanoma antigen family A, 8                        | -0.067 | 0.955 | 4.34E-01 | 4.34E+01 |  |
| 8170418 | ---                           | ---             | ---                                                 | 0.117  | 1.084 | 4.14E-01 | 4.14E+01 |  |
| 8170420 | NM_005491                     | MAMLD1          | mastermind-like domain containing                   | -0.153 | 0.900 | 7.75E-02 | 7.75E+00 |  |
| 8170428 | NM_000252                     | MTM1            | myotubularin 1                                      | 0.234  | 1.176 | 1.30E-02 | 1.30E+00 |  |
| 8170443 | NM_003828                     | MTMR1           | myotubularin related protein 1                      | 0.079  | 1.056 | 5.03E-01 | 5.03E+01 |  |
| 8170468 | NM_005342                     | HMGB3           | high-mobility group box 3                           | -0.004 | 0.997 | 9.90E-01 | 9.90E+01 |  |
| 8170479 | NM_00101798                   | VMA21           | VMA21 vacuolar H+-ATPase homolog                    | -0.003 | 0.998 | 9.86E-01 | 9.86E+01 |  |
| 8170553 | NM_175868                     | MAGEA6          | melanoma antigen family A, 6                        | 0.004  | 1.003 | 9.76E-01 | 9.76E+01 |  |
| 8170562 | NM_175742                     | MAGEA2          | melanoma antigen family A, 2                        | -0.021 | 0.986 | 8.41E-01 | 8.41E+01 |  |
| 8170576 | NM_153478                     | CSAG1           | chondrosarcoma associated gene                      | 0.044  | 1.031 | 7.44E-01 | 7.44E+01 |  |
| 8170580 | NM_00108084                   | CSAG2           | CSAG family, member 2                               | 0.012  | 1.009 | 9.44E-01 | 9.44E+01 |  |
| 8170590 | NM_015922                     | NSDHL           | NAD(P) dependent steroid dehydrogenase              | -0.026 | 0.982 | 9.22E-01 | 9.22E+01 |  |
| 8170602 | NM_007150                     | ZNF185          | zinc finger protein 185 (LIM domain)                | 0.074  | 1.053 | 5.29E-01 | 5.29E+01 |  |
| 8170622 | NM_013364                     | PNMA3           | paraneoplastic antigen MA3                          | -0.022 | 0.985 | 8.70E-01 | 8.70E+01 |  |
| 8170630 | NM_032882                     | PNMA6A          | paraneoplastic antigen like 6A                      | -0.017 | 0.989 | 9.54E-01 | 9.54E+01 |  |
| 8170635 | NM_00108048                   | ZNF275          | zinc finger protein 275                             | 0.015  | 1.011 | 9.65E-01 | 9.65E+01 |  |
| 8170648 | NM_001711                     | BGN             | biglycan                                            | -0.070 | 0.952 | 4.22E-01 | 4.22E+01 |  |
| 8170662 | NM_005629                     | SLC6A8          | solute carrier family 6 (neurotransmitter)          | 0.049  | 1.035 | 7.52E-01 | 7.52E+01 |  |
| 8170695 | NM_001395                     | DUSP9           | dual specificity phosphatase 9                      | 0.002  | 1.001 | 9.91E-01 | 9.91E+01 |  |
| 8170704 | NM_000033                     | ABCD1           | ATP-binding cassette, sub-family D                  | 0.092  | 1.065 | 2.83E-01 | 2.83E+01 |  |
| 8170716 | NM_005393                     | PLXNB3          | plexin B3                                           | -0.019 | 0.987 | 9.01E-01 | 9.01E+01 |  |
| 8170753 | NM_014370                     | SRPK3           | SFRS protein kinase 3                               | -0.009 | 0.994 | 9.53E-01 | 9.53E+01 |  |
| 8170775 | NM_006280                     | SSR4            | signal sequence receptor, delta (transmembrane)     | 0.096  | 1.069 | 2.32E-01 | 2.32E+01 |  |
| 8170786 | AF514420                      | LCAP            | lung carcinoma-associated protein                   | -0.004 | 0.997 | 9.78E-01 | 9.78E+01 |  |
| 8170794 | NM_00114615                   | AVPR2           | arginine vasopressin receptor 2                     | 0.037  | 1.026 | 7.58E-01 | 7.58E+01 |  |
| 8170803 | NM_003492                     | TMEM187         | transmembrane protein 187                           | 0.019  | 1.013 | 9.24E-01 | 9.24E+01 |  |
| 8170850 | NM_000117                     | EMD             | emerin                                              | -0.017 | 0.988 | 9.60E-01 | 9.60E+01 |  |
| 8170859 | NR_026898                     | RPL10           | ribosomal protein L10                               | 0.007  | 1.005 | 9.88E-01 | 9.88E+01 |  |
| 8170863 | NR_000011 // DRA70 // SNORA56 |                 | small nucleolar RNA, H/ACA box 7                    | -0.036 | 0.976 | 8.70E-01 | 8.70E+01 |  |
| 8170865 | NM_000116                     | TAZ             | tafazzin                                            | -0.019 | 0.987 | 8.80E-01 | 8.80E+01 |  |
| 8170882 | NM_001183                     | ATP6AP1         | ATPase, H+ transporting, lysosomal                  | 0.080  | 1.057 | 6.76E-01 | 6.76E+01 |  |
| 8170891 | NM_001493                     | GDI1            | GDP dissociation inhibitor 1                        | -0.125 | 0.917 | 9.87E-02 | 9.87E+00 |  |
| 8170906 | NM_004699                     | FAM50A          | family with sequence similarity 50                  | -0.065 | 0.956 | 7.07E-01 | 7.07E+01 |  |
| 8170921 | NM_017514                     | PLXNA3          | plexin A3                                           | -0.009 | 0.994 | 9.64E-01 | 9.64E+01 |  |
| 8170963 | AY168775                      | NCRNA00204      | non-protein coding RNA 204                          | -0.005 | 0.997 | 9.93E-01 | 9.93E+01 |  |
| 8170965 | NM_139250                     | CTAG1A          | cancer/testis antigen 1A                            | -0.057 | 0.961 | 4.06E-01 | 4.06E+01 |  |
| 8170971 | NM_001363                     | DKC1            | dyskeratosis congenita 1, dyskerin                  | 0.043  | 1.030 | 7.41E-01 | 7.41E+01 |  |
| 8170992 | NR_002984                     | SNORA56         | small nucleolar RNA, H/ACA box 5                    | 0.293  | 1.225 | 3.31E-01 | 3.31E+01 |  |
| 8170998 | NM_012151                     | F8A1            | coagulation factor VIII-associated                  | 0.021  | 1.014 | 9.12E-01 | 9.12E+01 |  |
| 8171001 | NM_023934                     | FUNDC2          | FUN14 domain containing 2                           | 0.012  | 1.009 | 9.69E-01 | 9.69E+01 |  |

|         |             |           |                                      |        |       |          |          |  |  |
|---------|-------------|-----------|--------------------------------------|--------|-------|----------|----------|--|--|
| 8171013 | NM_003372   | VBP1      | von Hippel-Lindau binding protein    | -0.014 | 0.990 | 9.51E-01 | 9.51E+01 |  |  |
| 8171024 | ---         | ---       | ---                                  | 0.151  | 1.110 | 2.37E-01 | 2.37E+01 |  |  |
| 8171029 | NM_012151   | F8A1      | coagulation factor VIII-associated   | 0.023  | 1.016 | 9.02E-01 | 9.02E+01 |  |  |
| 8171041 | NM_005638   | VAMP7     | vesicle-associated membrane prot     | 0.087  | 1.062 | 5.78E-01 | 5.78E+01 |  |  |
| 8171052 | NR_024033   | IL9R      | interleukin 9 receptor               | -0.041 | 0.972 | 6.91E-01 | 6.91E+01 |  |  |
| 8171066 | NR_024540   | WASH5P    | WAS protein family homolog 5 pse     | -0.051 | 0.965 | 6.96E-01 | 6.96E+01 |  |  |
| 8171079 | NM_012227   | GTPBP6    | GTP binding protein 6 (putative)     | -0.123 | 0.918 | 1.91E-01 | 1.91E+01 |  |  |
| 8171111 | NM_001636   | SLC25A6   | solute carrier family 25 (mitochon   | 0.006  | 1.004 | 9.78E-01 | 9.78E+01 |  |  |
| 8171119 | NM_004192   | ASMTL     | acetylserotonin O-methyltransfer     | -0.046 | 0.969 | 6.48E-01 | 6.48E+01 |  |  |
| 8171136 | NM_178129   | P2RY8     | purinergic receptor P2Y, G-protein   | -0.098 | 0.934 | 7.08E-01 | 7.08E+01 |  |  |
| 8171139 | NM_004729   | ZBED1     | zinc finger, BED-type containing 1   | 0.009  | 1.006 | 9.54E-01 | 9.54E+01 |  |  |
| 8171170 | ---         | ---       | ---                                  | 0.023  | 1.016 | 9.13E-01 | 9.13E+01 |  |  |
| 8171180 | ---         | ---       | ---                                  | -0.058 | 0.961 | 6.34E-01 | 6.34E+01 |  |  |
| 8171182 | NM_005044   | PRKX      | protein kinase, X-linked             | 0.003  | 1.002 | 9.88E-01 | 9.88E+01 |  |  |
| 8171193 | ---         | ---       | ---                                  | 0.140  | 1.102 | 6.19E-01 | 6.19E+01 |  |  |
| 8171203 | ---         | ---       | ---                                  | -0.002 | 0.999 | 9.96E-01 | 9.96E+01 |  |  |
| 8171216 | NM_016379   | VCX3A     | variable charge, X-linked 3A         | 0.006  | 1.004 | 9.75E-01 | 9.75E+01 |  |  |
| 8171222 | NM_00113556 | HDHD1A    | haloacid dehalogenase-like hydrol    | 0.086  | 1.062 | 7.09E-01 | 7.09E+01 |  |  |
| 8171229 | NM_004650   | PNPLA4    | patatin-like phospholipase domain    | 0.120  | 1.086 | 4.09E-01 | 4.09E+01 |  |  |
| 8171240 | NM_016378   | VCX2      | variable charge, X-linked 2          | 0.008  | 1.005 | 9.66E-01 | 9.66E+01 |  |  |
| 8171284 | NM_000273   | GPR143    | G protein-coupled receptor 143       | -0.099 | 0.934 | 1.68E-01 | 1.68E+01 |  |  |
| 8171295 | ---         | ---       | ---                                  | -0.005 | 0.996 | 9.78E-01 | 9.78E+01 |  |  |
| 8171336 | ---         | ---       | ---                                  | -0.077 | 0.948 | 4.28E-01 | 4.28E+01 |  |  |
| 8171350 | NM_152634   | TCEANC    | transcription elongation factor A (  | -0.142 | 0.906 | 1.54E-01 | 1.54E+01 |  |  |
| 8171352 | NM_00101165 | TRAPPC2   | trafficking protein particle comple  | -0.054 | 0.963 | 8.08E-01 | 8.08E+01 |  |  |
| 8171373 | NM_017856   | GEMIN8    | gem (nuclear organelle) associated   | -0.016 | 0.989 | 9.67E-01 | 9.67E+01 |  |  |
| 8171418 | NM_002641   | PIGA      | phosphatidylinositol glycan ancho    | -0.096 | 0.936 | 6.51E-01 | 6.51E+01 |  |  |
| 8171435 | NM_003662   | PIR       | pirin (iron-binding nuclear protein  | 0.059  | 1.042 | 8.21E-01 | 8.21E+01 |  |  |
| 8171481 | NM_003916   | AP1S2     | adaptor-related protein complex 2    | 0.226  | 1.169 | 1.35E-01 | 1.35E+01 |  |  |
| 8171493 | NM_175859   | CTPS2     | CTP synthase II                      | -0.071 | 0.952 | 6.91E-01 | 6.91E+01 |  |  |
| 8171516 | NM_002893   | RBBP7     | retinoblastoma binding protein 7     | -0.055 | 0.962 | 6.04E-01 | 6.04E+01 |  |  |
| 8171539 | NM_021785   | RAI2      | retinoic acid induced 2              | 0.058  | 1.041 | 5.59E-01 | 5.59E+01 |  |  |
| 8171587 | NM_000292   | PHKA2     | phosphorylase kinase, alpha 2 (livi  | -0.008 | 0.995 | 9.63E-01 | 9.63E+01 |  |  |
| 8171653 | NM_00100167 | MAP3K15   | mitogen-activated protein kinase f   | 0.041  | 1.029 | 7.54E-01 | 7.54E+01 |  |  |
| 8171684 | NM_031892   | SH3KBP1   | SH3-domain kinase binding protei     | -0.158 | 0.896 | 1.02E-01 | 1.02E+01 |  |  |
| 8171747 | NM_001412   | EIF1AX    | eukaryotic translation initiation fa | -0.018 | 0.987 | 9.41E-01 | 9.41E+01 |  |  |
| 8171758 | NR_023358   | SCARNA9L  | small Cajal body-specific RNA 9-lik  | 0.164  | 1.120 | 7.75E-01 | 7.75E+01 |  |  |
| 8171760 | NR_023358   | SCARNA9L  | small Cajal body-specific RNA 9-lik  | 0.100  | 1.072 | 4.39E-01 | 4.39E+01 |  |  |
| 8171762 | NM_004586   | RPS6KA3   | ribosomal protein S6 kinase, 90kd    | 0.025  | 1.018 | 8.84E-01 | 8.84E+01 |  |  |
| 8171786 | NM_153270   | KLHL34    | kelch-like 34 (Drosophila)           | -0.023 | 0.984 | 8.66E-01 | 8.66E+01 |  |  |
| 8171802 | NM_00103717 | ACOT9     | acyl-CoA thioesterase 9              | 0.240  | 1.181 | 2.29E-01 | 2.29E+01 |  |  |
| 8171834 | NM_000661   | RPL9      | ribosomal protein L9                 | 0.005  | 1.003 | 9.76E-01 | 9.76E+01 |  |  |
| 8171837 | NM_030624   | KLHL15    | kelch-like 15 (Drosophila)           | 0.010  | 1.007 | 9.68E-01 | 9.68E+01 |  |  |
| 8171846 | ---         | ---       | ---                                  | 0.030  | 1.021 | 9.38E-01 | 9.38E+01 |  |  |
| 8171848 | NM_004845   | PCYT1B    | phosphate cytidylyltransferase 1, c  | 0.073  | 1.052 | 3.16E-01 | 3.16E+01 |  |  |
| 8171865 | ---         | ---       | ---                                  | 0.041  | 1.029 | 8.48E-01 | 8.48E+01 |  |  |
| 8171867 | NM_139058   | ARX       | aristaless related homeobox          | -0.010 | 0.993 | 9.56E-01 | 9.56E+01 |  |  |
| 8171876 | NM_005371   | METTL1    | methyltransferase like 1             | 0.223  | 1.167 | 4.27E-01 | 4.27E+01 |  |  |
| 8171879 | ---         | ---       | ---                                  | 0.116  | 1.084 | 6.10E-01 | 6.10E+01 |  |  |
| 8171890 | ---         | ---       | ---                                  | 0.033  | 1.023 | 8.47E-01 | 8.47E+01 |  |  |
| 8171901 | NM_152787   | MAP3K7IP3 | mitogen-activated protein kinase f   | -0.120 | 0.920 | 2.06E-01 | 2.06E+01 |  |  |
| 8171917 | NM_031894   | FTHL17    | ferritin, heavy polypeptide-like 17  | -0.020 | 0.986 | 9.05E-01 | 9.05E+01 |  |  |
| 8172028 | ---         | ---       | ---                                  | 0.055  | 1.039 | 7.73E-01 | 7.73E+01 |  |  |
| 8172030 | ---         | ---       | ---                                  | 0.001  | 1.001 | 9.95E-01 | 9.95E+01 |  |  |
| 8172035 | NM_006520   | DYNLT3    | dynein, light chain, Tctex-type 3    | -0.068 | 0.954 | 7.62E-01 | 7.62E+01 |  |  |
| 8172056 | NM_000328   | RPGR      | retinitis pigmentosa GTPase regula   | -0.051 | 0.965 | 7.93E-01 | 7.93E+01 |  |  |
| 8172086 | ---         | ---       | ---                                  | 0.065  | 1.046 | 6.90E-01 | 6.90E+01 |  |  |
| 8172088 | NM_00112338 | BCOR      | BCL6 co-repressor                    | -0.080 | 0.946 | 4.47E-01 | 4.47E+01 |  |  |
| 8172110 | BC025334    | CXorf38   | chromosome X open reading fram       | 0.099  | 1.071 | 6.01E-01 | 6.01E+01 |  |  |
| 8172119 | NM_004229   | MED14     | mediator complex subunit 14          | -0.007 | 0.995 | 9.69E-01 | 9.69E+01 |  |  |
| 8172154 | NM_002952   | RPS2      | ribosomal protein S2                 | 0.017  | 1.012 | 9.03E-01 | 9.03E+01 |  |  |
| 8172156 | ---         | ---       | ---                                  | 0.021  | 1.014 | 9.64E-01 | 9.64E+01 |  |  |
| 8172158 | NM_003688   | CASK      | calcium/calmodulin-dependent se      | -0.034 | 0.977 | 8.77E-01 | 8.77E+01 |  |  |
| 8172197 | NR_002191   | PPP1R2P9  | protein phosphatase 1, regulatory    | -0.018 | 0.987 | 9.43E-01 | 9.43E+01 |  |  |
| 8172244 | NM_173794   | FUNDC1    | FUN14 domain containing 1            | 0.186  | 1.137 | 2.23E-01 | 2.23E+01 |  |  |
| 8172270 | ---         | ---       | ---                                  | -0.164 | 0.893 | 5.04E-01 | 5.04E+01 |  |  |
| 8172280 | NM_032591   | SLC9A7    | solute carrier family 9 (sodium/hy   | 0.143  | 1.104 | 4.00E-01 | 4.00E+01 |  |  |
| 8172296 | NR_024234   | NDUFEB11  | NADH dehydrogenase (ubiquinone       | -0.033 | 0.977 | 8.10E-01 | 8.10E+01 |  |  |
| 8172305 | ---         | ---       | ---                                  | 0.126  | 1.091 | 4.16E-01 | 4.16E+01 |  |  |
| 8172307 | NM_007130   | ZNF41     | zinc finger protein 41               | 0.002  | 1.002 | 9.92E-01 | 9.92E+01 |  |  |
| 8172317 | NM_006950   | SYN1      | synapsin I                           | -0.003 | 0.998 | 9.86E-01 | 9.86E+01 |  |  |
| 8172333 | NM_002621   | CFP       | complement factor properdin          | -0.056 | 0.962 | 6.71E-01 | 6.71E+01 |  |  |
| 8172345 | NM_00111412 | ELK1      | ELK1, member of ETS oncogene fa      | -0.107 | 0.928 | 1.95E-01 | 1.95E+01 |  |  |
| 8172358 | NM_153477   | UXT       | ubiquitously-expressed transcript    | -0.072 | 0.951 | 6.34E-01 | 6.34E+01 |  |  |
| 8172369 | NM_006962   | ZNF182    | zinc finger protein 182              | 0.052  | 1.037 | 7.44E-01 | 7.44E+01 |  |  |
| 8172379 | NM_00103773 | ZNF630    | zinc finger protein 630              | -0.046 | 0.969 | 8.91E-01 | 8.91E+01 |  |  |
| 8172425 | NM_033518   | SLC38A5   | solute carrier family 38, member 5   | -0.085 | 0.943 | 4.54E-01 | 4.54E+01 |  |  |

|         |             |               |                                      |        |       |          |          |  |  |
|---------|-------------|---------------|--------------------------------------|--------|-------|----------|----------|--|--|
| 8172443 | NM_002536   | TBC1D25       | TBC1 domain family, member 25        | -0.106 | 0.929 | 3.97E-01 | 3.97E+01 |  |  |
| 8172447 | NM_013271   | PCSK1N        | proprotein convertase subtilisin/k   | -0.025 | 0.983 | 8.43E-01 | 8.43E+01 |  |  |
| 8172453 | NM_005834   | TIMM17B       | translocase of inner mitochondria    | -0.002 | 0.998 | 9.89E-01 | 9.89E+01 |  |  |
| 8172460 | NM_00104249 | SLC35A2       | solute carrier family 35 (UDP-galac  | -0.033 | 0.978 | 8.10E-01 | 8.10E+01 |  |  |
| 8172471 | NM_006875   | PIM2          | pim-2 oncogene                       | 0.016  | 1.011 | 9.47E-01 | 9.47E+01 |  |  |
| 8172478 | NM_017602   | OTUD5         | OTU domain containing 5              | -0.045 | 0.969 | 7.97E-01 | 7.97E+01 |  |  |
| 8172504 | NM_020137   | GRIPAP1       | GRIP1 associated protein 1           | -0.041 | 0.972 | 7.42E-01 | 7.42E+01 |  |  |
| 8172520 | NM_006521   | TFE3          | transcription factor binding to IGH  | 0.028  | 1.020 | 8.80E-01 | 8.80E+01 |  |  |
| 8172531 | NM_007213   | PRAF2         | PRA1 domain family, member 2         | -0.116 | 0.923 | 3.49E-01 | 3.49E+01 |  |  |
| 8172538 | NM_007075   | WDR45         | WD repeat domain 45                  | -0.108 | 0.928 | 4.21E-01 | 4.21E+01 |  |  |
| 8172548 | NM_015698   | GPXOW         | G patch domain and KOW motifs        | -0.004 | 0.997 | 9.83E-01 | 9.83E+01 |  |  |
| 8172561 | NM_006150   | PRICKLE3      | prickle homolog 3 (Drosophila)       | -0.078 | 0.948 | 2.91E-01 | 2.91E+01 |  |  |
| 8172573 | NM_003179   | SYP           | synaptophysin                        | 0.035  | 1.024 | 8.54E-01 | 8.54E+01 |  |  |
| 8172580 | NM_005183   | CACNA1F       | calcium channel, voltage-depende     | 0.004  | 1.003 | 9.77E-01 | 9.77E+01 |  |  |
| 8172631 | NM_014009   | FOXP3         | forkhead box P3                      | -0.020 | 0.986 | 9.05E-01 | 9.05E+01 |  |  |
| 8172654 | NR_026742   | LOC158572     | hypothetical LOC158572               | 0.007  | 1.005 | 9.83E-01 | 9.83E+01 |  |  |
| 8172656 | ---         | ---           | ---                                  | 0.131  | 1.095 | 4.65E-01 | 4.65E+01 |  |  |
| 8172713 | XM_293416   | LOC347549     | hypothetical LOC347549               | -0.043 | 0.971 | 7.27E-01 | 7.27E+01 |  |  |
| 8172715 | AY730278    | LOC389857     | hypothetical protein                 | -0.027 | 0.982 | 8.61E-01 | 8.61E+01 |  |  |
| 8172717 | ---         | ---           | ---                                  | 0.212  | 1.158 | 4.23E-01 | 4.23E+01 |  |  |
| 8172722 | NM_00109880 | MAGED4        | melanoma antigen family D, 4         | -0.102 | 0.932 | 1.35E-01 | 1.35E+01 |  |  |
| 8172806 | NM_133179   | XAGE3         | X antigen family, member 3           | -0.055 | 0.962 | 7.25E-01 | 7.25E+01 |  |  |
| 8172813 | NM_014138   | FAM156A       | family with sequence similarity 15   | 0.272  | 1.207 | 2.74E-02 | 2.74E+00 |  |  |
| 8172827 | NM_004187   | KDM5C         | lysine (K)-specific demethylase 5C   | -0.035 | 0.976 | 8.71E-01 | 8.71E+01 |  |  |
| 8172876 | NM_006306   | SMC1A         | structural maintenance of chromo     | -0.038 | 0.974 | 8.24E-01 | 8.24E+01 |  |  |
| 8172905 | NM_004493   | HSD17B10      | hydroxysteroid (17-beta) dehydro     | -0.055 | 0.962 | 8.19E-01 | 8.19E+01 |  |  |
| 8172914 | NM_031407   | HUWE1         | HECT, UBA and WWE domain cont        | -0.111 | 0.926 | 2.27E-01 | 2.27E+01 |  |  |
| 8173009 | NM_015107   | PHF8          | PHD finger protein 8                 | -0.019 | 0.987 | 9.01E-01 | 9.01E+01 |  |  |
| 8173086 | NM_004463   | FGD1          | FYVE, RhoGEF and PH domain con       | -0.050 | 0.966 | 6.57E-01 | 6.57E+01 |  |  |
| 8173106 | NM_198510   | ITIH5L        | inter-alpha (globulin) inhibitor H5- | -0.061 | 0.959 | 5.35E-01 | 5.35E+01 |  |  |
| 8173135 | NM_000032   | ALAS2         | aminolevulinatase, delta-, synthase  | 0.087  | 1.062 | 4.96E-01 | 4.96E+01 |  |  |
| 8173156 | ---         | ---           | ---                                  | -0.109 | 0.927 | 7.72E-01 | 7.72E+01 |  |  |
| 8173174 | NM_201286   | USP51         | ubiquitin specific peptidase 51      | -0.027 | 0.981 | 8.92E-01 | 8.92E+01 |  |  |
| 8173179 | NR_002308   | RP11-278E11.2 | ubiquinol-cytochrome c reductase     | 0.084  | 1.060 | 6.67E-01 | 6.67E+01 |  |  |
| 8173181 | NR_027139   | SPIN3         | spindlin family, member 3            | 0.134  | 1.098 | 4.29E-01 | 4.29E+01 |  |  |
| 8173189 | NM_00100668 | SPIN2B        | spindlin family, member 2B           | 0.033  | 1.023 | 8.86E-01 | 8.86E+01 |  |  |
| 8173201 | NM_007156   | ZXDA          | zinc finger, X-linked, duplicated A  | -0.072 | 0.951 | 7.27E-01 | 7.27E+01 |  |  |
| 8173204 | ---         | ---           | ---                                  | -0.030 | 0.979 | 8.47E-01 | 8.47E+01 |  |  |
| 8173206 | ---         | ---           | ---                                  | -0.055 | 0.962 | 7.73E-01 | 7.73E+01 |  |  |
| 8173208 | NM_00101296 | SPIN4         | spindlin family, member 4            | 0.150  | 1.110 | 1.16E-01 | 1.16E+01 |  |  |
| 8173217 | NM_015185   | ARHGEF9       | Cdc42 guanine nucleotide exchang     | 0.048  | 1.033 | 8.50E-01 | 8.50E+01 |  |  |
| 8173232 | NM_152424   | FAM123B       | family with sequence similarity 12   | 0.002  | 1.001 | 9.91E-01 | 9.91E+01 |  |  |
| 8173261 | NM_018684   | ZC4H2         | zinc finger, C4H2 domain containi    | 0.060  | 1.043 | 7.56E-01 | 7.56E+01 |  |  |
| 8173269 | NM_031206   | LAS1L         | LAS1-like (S. cerevisiae)            | -0.015 | 0.990 | 9.49E-01 | 9.49E+01 |  |  |
| 8173287 | NM_007268   | VSIG4         | V-set and immunoglobulin domain      | 0.124  | 1.090 | 4.38E-01 | 4.38E+01 |  |  |
| 8173338 | ---         | ---           | ---                                  | -0.159 | 0.896 | 4.69E-01 | 4.69E+01 |  |  |
| 8173340 | NM_145119   | PJA1          | praja ring finger 1                  | -0.056 | 0.962 | 7.38E-01 | 7.38E+01 |  |  |
| 8173373 | NM_016484   | PDZD11        | PDZ domain containing 11             | -0.042 | 0.972 | 8.87E-01 | 8.87E+01 |  |  |
| 8173428 | ---         | ---           | ---                                  | -0.004 | 0.997 | 9.88E-01 | 9.88E+01 |  |  |
| 8173430 | NM_013346   | SNX12         | sorting nexin 12                     | 0.056  | 1.040 | 7.35E-01 | 7.35E+01 |  |  |
| 8173437 | NM_00102526 | CXorf65       | chromosome X open reading fram       | -0.110 | 0.926 | 7.16E-01 | 7.16E+01 |  |  |
| 8173444 | NM_000206   | IL2RG         | interleukin 2 receptor, gamma (se    | -0.018 | 0.988 | 9.12E-01 | 9.12E+01 |  |  |
| 8173457 | NM_201599   | ZMYM3         | zinc finger, MYM-type 3              | 0.039  | 1.027 | 8.06E-01 | 8.06E+01 |  |  |
| 8173486 | NR_002226   | INGX          | inhibitor of growth family, X-linke  | -0.006 | 0.996 | 9.84E-01 | 9.84E+01 |  |  |
| 8173493 | NM_00114279 | CXCR3         | chemokine (C-X-C motif) receptor     | -0.046 | 0.969 | 7.48E-01 | 7.48E+01 |  |  |
| 8173503 | NM_00102445 | RGAG4         | retrotransposon gag domain conta     | 0.254  | 1.192 | 5.76E-03 | 5.76E-01 |  |  |
| 8173513 | NM_001007   | RPS4X         | ribosomal protein S4, X-linked       | -0.010 | 0.993 | 9.55E-01 | 9.55E+01 |  |  |
| 8173524 | NM_00114488 | CITED1        | Cbp/p300-interacting transactivat    | 0.003  | 1.002 | 9.86E-01 | 9.86E+01 |  |  |
| 8173531 | NM_018486   | HDAC8         | histone deacetylase 8                | 0.032  | 1.022 | 8.97E-01 | 8.97E+01 |  |  |
| 8173549 | ---         | ---           | ---                                  | 0.058  | 1.041 | 7.87E-01 | 7.87E+01 |  |  |
| 8173583 | NM_033053   | DMRTC1        | DMRT-like family C1                  | -0.014 | 0.990 | 9.23E-01 | 9.23E+01 |  |  |
| 8173596 | NM_00101297 | PABPC1L2A     | poly(A) binding protein, cytoplasm   | -0.097 | 0.935 | 1.67E-01 | 1.67E+01 |  |  |
| 8173607 | ---         | ---           | ---                                  | 0.018  | 1.012 | 9.41E-01 | 9.41E+01 |  |  |
| 8173613 | NM_016120   | RLIM          | ring finger protein, LIM domain int  | -0.037 | 0.975 | 8.84E-01 | 8.84E+01 |  |  |
| 8173615 | NM_183353   | RLIM          | ring finger protein, LIM domain int  | 0.048  | 1.034 | 8.44E-01 | 8.44E+01 |  |  |
| 8173627 | ---         | ---           | ---                                  | -0.373 | 0.772 | 4.63E-01 | 4.63E+01 |  |  |
| 8173629 | NM_004299   | ABC87         | ATP-binding cassette, sub-family B   | 0.113  | 1.082 | 2.04E-01 | 2.04E+01 |  |  |
| 8173673 | NM_000489   | ATRX          | alpha thalassemia/mental retardat    | -0.034 | 0.977 | 7.95E-01 | 7.95E+01 |  |  |
| 8173713 | NM_032121   | MAGT1         | magnesium transporter 1              | 0.262  | 1.199 | 2.08E-02 | 2.08E+00 |  |  |
| 8173729 | NM_00102989 | PGAM4         | phosphoglycerate mutase family r     | 0.001  | 1.001 | 9.96E-01 | 9.96E+01 |  |  |
| 8173732 | NM_015975   | TAF9B         | TAF9B RNA polymerase II, TATA bo     | -0.199 | 0.871 | 4.39E-02 | 4.39E+00 |  |  |
| 8173745 | NM_006639   | CYSLTR1       | cysteinyl leukotriene receptor 1     | 0.043  | 1.030 | 9.50E-01 | 9.50E+01 |  |  |
| 8173755 | NM_004867   | ITM2A         | integral membrane protein 2A         | -0.091 | 0.939 | 6.62E-01 | 6.62E+01 |  |  |
| 8173766 | NM_153252   | BRWD3         | bromodomain and WD repeat dor        | 0.009  | 1.006 | 9.70E-01 | 9.70E+01 |  |  |
| 8173812 | NM_030763   | NSBP1         | nucleosomal binding protein 1        | 0.008  | 1.005 | 9.85E-01 | 9.85E+01 |  |  |
| 8173912 | AF284768    | RPSAP15       | ribosomal protein SA pseudogene      | -0.084 | 0.943 | 5.51E-01 | 5.51E+01 |  |  |
| 8174005 | NM_024917   | TRMT2B        | TRM2 tRNA methyltransferase 2 h      | -0.011 | 0.992 | 9.64E-01 | 9.64E+01 |  |  |

|         |             |                 |                                     |        |       |          |          |  |  |
|---------|-------------|-----------------|-------------------------------------|--------|-------|----------|----------|--|--|
| 8174026 | DQ145510    | LOC392510       | tyrosine 3/tryptophan 5 -monoox     | -0.028 | 0.981 | 8.57E-01 | 8.57E+01 |  |  |
| 8174076 | NM_000169   | GLA             | galactosidase, alpha                | 0.349  | 1.273 | 2.16E-01 | 2.16E+01 |  |  |
| 8174086 | NM_019007   | ARMCX6          | armadillo repeat containing, X-link | -0.077 | 0.948 | 4.96E-01 | 4.96E+01 |  |  |
| 8174103 | NM_00112812 | GK              | glycerol kinase                     | -0.051 | 0.965 | 9.45E-01 | 9.45E+01 |  |  |
| 8174105 | NM_032946   | NXF5            | nuclear RNA export factor 5         | 0.030  | 1.021 | 8.98E-01 | 8.98E+01 |  |  |
| 8174119 | NM_00101165 | ZMAT1           | zinc finger, matrin type 1          | 0.106  | 1.076 | 6.78E-01 | 6.78E+01 |  |  |
| 8174134 | NM_00100693 | TCEAL6          | transcription elongation factor A ( | -0.001 | 0.999 | 9.96E-01 | 9.96E+01 |  |  |
| 8174141 | NM_00101297 | BEX5            | brain expressed, X-linked 5         | -0.249 | 0.841 | 3.72E-01 | 3.72E+01 |  |  |
| 8174193 | ---         | ---             | ---                                 | 0.075  | 1.053 | 8.36E-01 | 8.36E+01 |  |  |
| 8174195 | ---         | ---             | ---                                 | 0.050  | 1.035 | 8.33E-01 | 8.33E+01 |  |  |
| 8174226 | ---         | ---             | ---                                 | 0.059  | 1.042 | 8.70E-01 | 8.70E+01 |  |  |
| 8174228 | NM_153333   | TCEAL8          | transcription elongation factor A ( | 0.059  | 1.042 | 6.20E-01 | 6.20E+01 |  |  |
| 8174239 | NM_032621   | BEX2            | brain expressed X-linked 2          | -0.008 | 0.994 | 9.81E-01 | 9.81E+01 |  |  |
| 8174246 | NM_080879   | RAB40A          | RAB40A, member RAS oncogene f       | 0.035  | 1.025 | 7.62E-01 | 7.62E+01 |  |  |
| 8174253 | NM_00114241 | MORF4L2         | mortality factor 4 like 2           | 0.021  | 1.015 | 8.88E-01 | 8.88E+01 |  |  |
| 8174279 | ---         | ---             | ---                                 | -0.055 | 0.963 | 6.69E-01 | 6.69E+01 |  |  |
| 8174283 | NM_00100291 | H2BFWT          | H2B histone family, member W, te    | 0.028  | 1.020 | 8.72E-01 | 8.72E+01 |  |  |
| 8174288 | NM_00101275 | MCART6          | mitochondrial carrier triple repeat | -0.019 | 0.987 | 9.03E-01 | 9.03E+01 |  |  |
| 8174317 | NM_138382   | RIPPLY1         | rippy1 homolog (zebrafish)          | -0.093 | 0.937 | 3.79E-01 | 3.79E+01 |  |  |
| 8174338 | NM_024657   | MORC4           | MORC family CW-type zinc finger     | 0.030  | 1.021 | 8.16E-01 | 8.16E+01 |  |  |
| 8174340 | NM_018301   | RBM41           | RNA binding motif protein 41        | 0.013  | 1.009 | 9.67E-01 | 9.67E+01 |  |  |
| 8174361 | NM_198057   | TSC2D3          | TSC22 domain family, member 3       | -0.084 | 0.944 | 2.72E-01 | 2.72E+01 |  |  |
| 8174375 | NM_031273   | TEX13B          | testis expressed 13B                | -0.025 | 0.983 | 8.05E-01 | 8.05E+01 |  |  |
| 8174379 | NM_002814   | PSMD10          | proteasome (prosome, macropain      | 0.081  | 1.058 | 7.49E-01 | 7.49E+01 |  |  |
| 8174389 | NM_033641   | COL4A6          | collagen, type IV, alpha 6          | -0.035 | 0.976 | 7.25E-01 | 7.25E+01 |  |  |
| 8174469 | NM_012282   | KCNE1L          | KCNE1-like                          | -0.037 | 0.975 | 7.75E-01 | 7.75E+01 |  |  |
| 8174474 | NM_022977   | ACSL4           | acyl-CoA synthetase long-chain fat  | 0.185  | 1.136 | 4.05E-01 | 4.05E+01 |  |  |
| 8174496 | NM_015365   | AMMECR1         | Alport syndrome, mental retardat    | -0.025 | 0.983 | 9.09E-01 | 9.09E+01 |  |  |
| 8174509 | NM_005274   | GN55            | guanine nucleotide binding protei   | 0.175  | 1.129 | 1.01E-01 | 1.01E+01 |  |  |
| 8174513 | NM_145234   | CHRD1           | chordin-like 1                      | -0.023 | 0.984 | 9.00E-01 | 9.00E+01 |  |  |
| 8174636 | NM_006937   | SUMO2           | SMT3 suppressor of mif two 3 hon    | -0.024 | 0.984 | 8.71E-01 | 8.71E+01 |  |  |
| 8174642 | ---         | ---             | ---                                 | -0.046 | 0.969 | 7.44E-01 | 7.44E+01 |  |  |
| 8174644 | ---         | ---             | ---                                 | 0.044  | 1.031 | 7.26E-01 | 7.26E+01 |  |  |
| 8174675 | NM_001152   | SLC25A5         | solute carrier family 25 (mitochon  | 0.039  | 1.027 | 8.36E-01 | 8.36E+01 |  |  |
| 8174677 | AK298877    | CXorf56         | chromosome X open reading fram      | 0.200  | 1.148 | 2.11E-01 | 2.11E+01 |  |  |
| 8174684 | NM_017544   | NKRF            | NFKB repressing factor              | 0.005  | 1.003 | 9.86E-01 | 9.86E+01 |  |  |
| 8174692 | NM_145799   | 40427           | sepin 6                             | -0.055 | 0.963 | 7.40E-01 | 7.40E+01 |  |  |
| 8174710 | NM_001000   | /RPL39 // RPL39 | ribosomal protein L39 // ribosom    | -0.008 | 0.994 | 9.63E-01 | 9.63E+01 |  |  |
| 8174717 | NM_080632   | UPF3B           | UPF3 regulator of nonsense trans    | -0.025 | 0.983 | 8.91E-01 | 8.91E+01 |  |  |
| 8174731 | NM_006978   | RNF113A         | ring finger protein 113A            | -0.050 | 0.966 | 7.17E-01 | 7.17E+01 |  |  |
| 8174737 | NM_024528   | NKAP            | NFKB activating protein             | -0.082 | 0.945 | 5.47E-01 | 5.47E+01 |  |  |
| 8174750 | NM_032498   | RHOXF2          | Rho homeobox family, member 2       | -0.005 | 0.996 | 9.85E-01 | 9.85E+01 |  |  |
| 8174761 | NR_027131   | CXorf42         | chromosome X open reading fram      | 0.049  | 1.034 | 8.29E-01 | 8.29E+01 |  |  |
| 8174767 | NM_017938   | FAM70A          | family with sequence similarity 70  | -0.114 | 0.924 | 6.33E-01 | 6.33E+01 |  |  |
| 8174794 | NM_00107987 | CUL4B           | cullin 4B                           | 0.030  | 1.021 | 8.01E-01 | 8.01E+01 |  |  |
| 8174837 | NM_00108014 | CT47A1          | cancer/testis antigen family 47, m  | -0.028 | 0.981 | 8.41E-01 | 8.41E+01 |  |  |
| 8174841 | NM_00108014 | CT47A1          | cancer/testis antigen family 47, m  | -0.028 | 0.981 | 8.41E-01 | 8.41E+01 |  |  |
| 8174845 | NM_00108014 | CT47A1          | cancer/testis antigen family 47, m  | -0.028 | 0.981 | 8.41E-01 | 8.41E+01 |  |  |
| 8174849 | NM_00108014 | CT47A1          | cancer/testis antigen family 47, m  | -0.028 | 0.981 | 8.41E-01 | 8.41E+01 |  |  |
| 8174853 | NM_00108014 | CT47A6          | cancer/testis antigen family 47, m  | -0.036 | 0.975 | 7.74E-01 | 7.74E+01 |  |  |
| 8174862 | NM_00108013 | CT47A10         | cancer/testis antigen family 47, m  | -0.028 | 0.981 | 8.41E-01 | 8.41E+01 |  |  |
| 8174867 | NM_00108014 | CT47A1          | cancer/testis antigen family 47, m  | -0.028 | 0.981 | 8.41E-01 | 8.41E+01 |  |  |
| 8174872 | NM_00108014 | CT47A1          | cancer/testis antigen family 47, m  | -0.028 | 0.981 | 8.41E-01 | 8.41E+01 |  |  |
| 8174876 | NM_00108014 | CT47A1          | cancer/testis antigen family 47, m  | -0.028 | 0.981 | 8.41E-01 | 8.41E+01 |  |  |
| 8174882 | NM_00108014 | CT47A1          | cancer/testis antigen family 47, m  | -0.028 | 0.981 | 8.41E-01 | 8.41E+01 |  |  |
| 8174891 | ---         | ---             | ---                                 | -0.161 | 0.895 | 6.56E-02 | 6.56E+00 |  |  |
| 8174893 | NM_00108155 | THOC2           | THO complex 2                       | 0.020  | 1.014 | 8.76E-01 | 8.76E+01 |  |  |
| 8174937 | NM_014253   | ODZ1            | odz, odd Oz/ten-m homolog 1(Drd     | 0.034  | 1.024 | 8.47E-01 | 8.47E+01 |  |  |
| 8174968 | NM_00101362 | DCAF12L2        | DB1 and CUL4 associated factor      | -0.107 | 0.929 | 1.74E-01 | 1.74E+01 |  |  |
| 8174970 | ---         | ---             | ---                                 | 0.047  | 1.033 | 2.94E-01 | 2.94E+01 |  |  |
| 8174972 | NM_178470   | DCAF12L1        | DB1 and CUL4 associated factor      | -0.098 | 0.934 | 5.37E-01 | 5.37E+01 |  |  |
| 8174977 | ---         | ---             | ---                                 | -0.059 | 0.960 | 7.11E-01 | 7.11E+01 |  |  |
| 8174983 | ---         | ---             | ---                                 | -0.153 | 0.899 | 4.65E-01 | 4.65E+01 |  |  |
| 8175016 | NM_017413   | APLN            | apelin                              | 0.009  | 1.006 | 9.53E-01 | 9.53E+01 |  |  |
| 8175023 | NM_016032   | ZDHHC9          | zinc finger, DHHC-type containing   | -0.002 | 0.999 | 9.94E-01 | 9.94E+01 |  |  |
| 8175039 | NM_001421   | ELF4            | E74-like factor 4 (ets domain trans | 0.221  | 1.165 | 2.39E-02 | 2.39E+00 |  |  |
| 8175052 | NM_00113084 | AIFM1           | apoptosis-inducing factor, mitoch   | 0.033  | 1.023 | 8.82E-01 | 8.82E+01 |  |  |
| 8175098 | NM_178471   | GPR119          | G protein-coupled receptor 119      | -0.112 | 0.926 | 3.57E-01 | 3.57E+01 |  |  |
| 8175102 | NM_182314   | ENOX2           | ecto-NOX disulfide-thiol exchange   | -0.017 | 0.988 | 9.44E-01 | 9.44E+01 |  |  |
| 8175169 | NM_021183   | RAP2C           | RAP2C, member of RAS oncogene       | -0.042 | 0.971 | 8.13E-01 | 8.13E+01 |  |  |
| 8175177 | NM_018388   | MBNL3           | muscleblind-like 3 (Drosophila)     | 0.075  | 1.053 | 6.99E-01 | 6.99E+01 |  |  |
| 8175254 | ---         | ---             | ---                                 | -0.103 | 0.931 | 6.47E-01 | 6.47E+01 |  |  |
| 8175256 | NR_024607   | MGC16121        | hypothetical protein MGC16121       | 0.013  | 1.009 | 9.47E-01 | 9.47E+01 |  |  |
| 8175261 | ---         | ---             | ---                                 | -0.063 | 0.957 | 7.38E-01 | 7.38E+01 |  |  |
| 8175269 | NM_145284   | FAM122B         | family with sequence similarity 12  | 0.027  | 1.019 | 8.59E-01 | 8.59E+01 |  |  |
| 8175299 | NM_00107817 | FAM127C         | family with sequence similarity 12  | 0.036  | 1.025 | 8.28E-01 | 8.28E+01 |  |  |
| 8175302 | NM_00107817 | FAM127B         | family with sequence similarity 12  | 0.047  | 1.033 | 7.36E-01 | 7.36E+01 |  |  |

|         |              |            |                                                                   |        |       |          |          |  |  |
|---------|--------------|------------|-------------------------------------------------------------------|--------|-------|----------|----------|--|--|
| 8175308 | NR_024493    | NCRNA00087 | non-protein coding RNA 87                                         | -0.096 | 0.936 | 3.58E-01 | 3.58E+01 |  |  |
| 8175311 | NM_00103170  | CXorf48    | chromosome X open reading frame                                   | -0.095 | 0.936 | 6.14E-01 | 6.14E+01 |  |  |
| 8175319 | NM_007131    | ZNF75D     | zinc finger protein 75D                                           | -0.070 | 0.953 | 5.41E-01 | 5.41E+01 |  |  |
| 8175330 | ---          | ---        | ---                                                               | -0.051 | 0.966 | 7.59E-01 | 7.59E+01 |  |  |
| 8175360 | NM_173470    | MMGT1      | membrane magnesium transporter                                    | -0.045 | 0.969 | 7.73E-01 | 7.73E+01 |  |  |
| 8175369 | NM_024597    | MAP7D3     | MAP7 domain containing 3                                          | -0.079 | 0.947 | 4.55E-01 | 4.55E+01 |  |  |
| 8175391 | ---          | ---        | ---                                                               | 0.043  | 1.030 | 8.61E-01 | 8.61E+01 |  |  |
| 8175393 | NM_004840    | ARHGEF6    | Rac/Cdc42 guanine nucleotide exchange factor                      | 0.137  | 1.099 | 2.26E-01 | 2.26E+01 |  |  |
| 8175420 | NM_002139    | RBMX       | RNA binding motif protein, X-linked                               | -0.005 | 0.997 | 9.80E-01 | 9.80E+01 |  |  |
| 8175432 | NR_002735    | SNORD61    | small nucleolar RNA, C/D box 61                                   | 0.312  | 1.242 | 3.59E-01 | 3.59E+01 |  |  |
| 8175438 | ---          | ---        | ---                                                               | -0.019 | 0.987 | 9.27E-01 | 9.27E+01 |  |  |
| 8175444 | NM_004114    | FGF13      | fibroblast growth factor 13                                       | -0.030 | 0.980 | 8.50E-01 | 8.50E+01 |  |  |
| 8175455 | ---          | ---        | ---                                                               | -0.066 | 0.955 | 5.64E-01 | 5.64E+01 |  |  |
| 8175492 | NM_173694    | ATP11C     | ATPase, class VI, type 11C                                        | 0.002  | 1.002 | 9.90E-01 | 9.90E+01 |  |  |
| 8175528 | NM_005634    | SOX3       | SRY (sex determining region Y)-box 3                              | -0.048 | 0.967 | 7.04E-01 | 7.04E+01 |  |  |
| 8175537 | AK093505     | CXorf18    | chromosome X open reading frame                                   | -0.057 | 0.961 | 5.92E-01 | 5.92E+01 |  |  |
| 8175539 | NM_012317    | LDOC1      | leucine zipper, down-regulated in cancer                          | -0.079 | 0.947 | 6.10E-01 | 6.10E+01 |  |  |
| 8175558 | NM_145665    | SPANX      | SPANX family, member E                                            | -0.172 | 0.888 | 2.84E-01 | 2.84E+01 |  |  |
| 8175593 | NM_000202    | IDS        | iduronate 2-sulfatase                                             | -0.216 | 0.861 | 1.94E-03 | 1.94E-01 |  |  |
| 8175609 | 0            | 0          | 0                                                                 | -0.080 | 0.946 | 8.05E-01 | 8.05E+01 |  |  |
| 8175611 | NM_005365    | MAGEA9     | melanoma antigen family A, 9                                      | 0.045  | 1.032 | 6.80E-01 | 6.80E+01 |  |  |
| 8175616 | NM_016153    | HSFX1      | heat shock transcription factor family class X member 1           | -0.087 | 0.941 | 3.14E-01 | 3.14E+01 |  |  |
| 8175621 | NM_032508    | TMEM185A   | transmembrane protein 185A                                        | 0.106  | 1.077 | 5.25E-01 | 5.25E+01 |  |  |
| 8175638 | ENST00000432 | FLJ16423   | hypothetical LOC642889                                            | 0.006  | 1.004 | 9.81E-01 | 9.81E+01 |  |  |
| 8175647 | NM_031462    | CD99L2     | CD99 molecule-like 2                                              | 0.058  | 1.041 | 6.23E-01 | 6.23E+01 |  |  |
| 8175664 | ---          | ---        | ---                                                               | -0.080 | 0.946 | 5.39E-01 | 5.39E+01 |  |  |
| 8175685 | NM_021049    | MAGEA5     | melanoma antigen family A, 5                                      | 0.032  | 1.022 | 8.04E-01 | 8.04E+01 |  |  |
| 8175690 | NM_00101154  | MAGEA10    | melanoma antigen family A, 10                                     | -0.019 | 0.987 | 8.93E-01 | 8.93E+01 |  |  |
| 8175710 | NM_00108084  | CSAG2      | CSAG family, member 2                                             | 0.018  | 1.012 | 9.17E-01 | 9.17E+01 |  |  |
| 8175724 | NM_005367    | MAGEA12    | melanoma antigen family A, 12                                     | 0.011  | 1.007 | 9.64E-01 | 9.64E+01 |  |  |
| 8175732 | NM_175742    | MAGEA2     | melanoma antigen family A, 2                                      | -0.009 | 0.994 | 9.45E-01 | 9.45E+01 |  |  |
| 8175747 | NM_005362    | MAGEA3     | melanoma antigen family A, 3                                      | 0.000  | 1.000 | 1.00E+00 | 1.00E+02 |  |  |
| 8175755 | NM_004344    | CETN2      | centrin, EF-hand protein, 2                                       | -0.201 | 0.870 | 9.30E-02 | 9.30E+00 |  |  |
| 8175763 | NM_00110315  | PNMA5      | paraneoplastic antigen like 5                                     | -0.002 | 0.999 | 9.90E-01 | 9.90E+01 |  |  |
| 8175768 | NM_032882    | PNMA6A     | paraneoplastic antigen like 6A                                    | -0.054 | 0.963 | 6.90E-01 | 6.90E+01 |  |  |
| 8175775 | NM_004988    | MAGEA1     | melanoma antigen family A, 1 (directional)                        | 0.003  | 1.002 | 9.86E-01 | 9.86E+01 |  |  |
| 8175782 | NM_207107    | HAUS7      | HAUS augmin-like complex, subunit 7                               | 0.013  | 1.009 | 9.14E-01 | 9.14E+01 |  |  |
| 8175802 | NM_080701    | TREX2      | three prime repair exonuclease 2                                  | -0.083 | 0.944 | 2.83E-01 | 2.83E+01 |  |  |
| 8175808 | NM_080701    | TREX2      | three prime repair exonuclease 2                                  | -0.103 | 0.931 | 3.27E-01 | 3.27E+01 |  |  |
| 8175811 | NM_152274    | FAM58A     | family with sequence similarity 58                                | 0.018  | 1.013 | 9.41E-01 | 9.41E+01 |  |  |
| 8175815 | NM_00103958  | PNCK       | pregnancy up-regulated non-ubiquitin-protein                      | 0.027  | 1.019 | 7.91E-01 | 7.91E+01 |  |  |
| 8175835 | NM_00113945  | BCAP31     | B-cell receptor-associated protein                                | 0.213  | 1.159 | 2.91E-01 | 2.91E+01 |  |  |
| 8175844 | NM_174869    | IDH3G      | isocitrate dehydrogenase 3 (NAD+ dependent)                       | 0.009  | 1.006 | 9.67E-01 | 9.67E+01 |  |  |
| 8175871 | NM_000425    | L1CAM      | L1 cell adhesion molecule                                         | -0.027 | 0.981 | 8.43E-01 | 8.43E+01 |  |  |
| 8175900 | NM_001666    | ARHGAP4    | Rho GTPase activating protein 4                                   | 0.010  | 1.007 | 9.44E-01 | 9.44E+01 |  |  |
| 8175924 | NM_003491    | ARD1A      | ARD1 homolog A, N-acetyltransferase                               | -0.078 | 0.947 | 6.11E-01 | 6.11E+01 |  |  |
| 8175947 | NM_005334    | HCFC1      | host cell factor C1 (VP16-accessory protein)                      | 0.010  | 1.007 | 9.56E-01 | 9.56E+01 |  |  |
| 8175977 | NM_001569    | IRAK1      | interleukin-1 receptor-associated kinase 1                        | 0.015  | 1.010 | 9.16E-01 | 9.16E+01 |  |  |
| 8175998 | NM_004992    | MECP2      | methyl CpG binding protein 2 (Retentive)                          | -0.074 | 0.950 | 6.04E-01 | 6.04E+01 |  |  |
| 8176006 | NM_001586    | TEX28      | testis expressed 28                                               | -0.034 | 0.977 | 7.52E-01 | 7.52E+01 |  |  |
| 8176012 | NM_001586    | TEX28      | testis expressed 28                                               | -0.034 | 0.977 | 7.52E-01 | 7.52E+01 |  |  |
| 8176018 | NM_001586    | TEX28      | testis expressed 28                                               | -0.058 | 0.961 | 4.67E-01 | 4.67E+01 |  |  |
| 8176026 | NM_001456    | FLNA       | filamin A, alpha                                                  | 0.013  | 1.009 | 9.63E-01 | 9.63E+01 |  |  |
| 8176076 | NM_00100993  | DNASE1L1   | deoxyribonuclease I-like 1                                        | 0.088  | 1.063 | 3.97E-01 | 3.97E+01 |  |  |
| 8176091 | BC009467     | LOC158960  | hypothetical protein BC009467                                     | -0.004 | 0.997 | 9.81E-01 | 9.81E+01 |  |  |
| 8176093 | NM_006014    | LAGE3      | L antigen family, member 3                                        | 0.007  | 1.005 | 9.80E-01 | 9.80E+01 |  |  |
| 8176098 | NM_014235    | UBL4A      | ubiquitin-like 4A                                                 | 0.060  | 1.043 | 5.37E-01 | 5.37E+01 |  |  |
| 8176109 | NM_019848    | SLC10A3    | solute carrier family 10 (sodium/bicarbonate)                     | 0.014  | 1.010 | 9.36E-01 | 9.36E+01 |  |  |
| 8176117 | NM_021806    | FAM3A      | family with sequence similarity 3, member A                       | -0.063 | 0.957 | 5.84E-01 | 5.84E+01 |  |  |
| 8176133 | NM_000402    | G6PD       | glucose-6-phosphate dehydrogenase                                 | 0.181  | 1.133 | 3.35E-01 | 3.35E+01 |  |  |
| 8176149 | NM_139250    | CTAG1A     | cancer/testis antigen 1A                                          | -0.057 | 0.961 | 4.06E-01 | 4.06E+01 |  |  |
| 8176155 | AY168775     | NCRNA00204 | non-protein coding RNA 204                                        | -0.005 | 0.997 | 9.93E-01 | 9.93E+01 |  |  |
| 8176159 | NM_020994    | CTAG2      | cancer/testis antigen 2                                           | 0.006  | 1.004 | 9.71E-01 | 9.71E+01 |  |  |
| 8176163 | NM_00108157  | GAB3       | GRB2-associated binding protein 3                                 | 0.091  | 1.065 | 6.84E-01 | 6.84E+01 |  |  |
| 8176191 | NM_004965    | HMG1       | high-mobility group nucleosome binding protein 1                  | -0.021 | 0.985 | 9.20E-01 | 9.20E+01 |  |  |
| 8176219 | NM_00101802  | MTCP1      | mature T-cell proliferation 1                                     | -0.018 | 0.988 | 9.61E-01 | 9.61E+01 |  |  |
| 8176230 | NM_171998    | RAB39B     | RAB39B, member RAS oncogene family                                | -0.154 | 0.899 | 3.06E-01 | 3.06E+01 |  |  |
| 8176245 | NM_012151    | F8A1       | coagulation factor VIII-associated protein 1                      | 0.018  | 1.013 | 9.13E-01 | 9.13E+01 |  |  |
| 8176253 | ---          | ---        | ---                                                               | 0.236  | 1.178 | 3.38E-01 | 3.38E+01 |  |  |
| 8176255 | NM_018196    | TMLHE      | trimethyllysine hydroxylase, epsilon                              | 0.098  | 1.070 | 6.99E-01 | 6.99E+01 |  |  |
| 8176263 | NM_015975    | TAF9B      | TAF9B RNA polymerase II, TATA box binding protein                 | -0.199 | 0.871 | 4.39E-02 | 4.39E+00 |  |  |
| 8176276 | NM_000489    | ATRX       | alpha thalassemia/mental retardation X-linked                     | -0.179 | 0.883 | 4.84E-01 | 4.84E+01 |  |  |
| 8176282 | NM_00102989  | PGAM4      | phosphoglycerate mutase family member 4                           | 0.001  | 1.001 | 9.96E-01 | 9.96E+01 |  |  |
| 8176286 | NM_018390    | PLCXD1     | phosphatidylinositol-specific phospholipase C domain containing 1 | 0.056  | 1.040 | 7.45E-01 | 7.45E+01 |  |  |
| 8176306 | NM_00116153  | CSF2RA     | colony stimulating factor 2 receptor, alpha                       | -0.194 | 0.874 | 4.61E-01 | 4.61E+01 |  |  |
| 8176323 | NM_002183    | IL3RA      | interleukin 3 receptor, alpha (low affinity)                      | -0.283 | 0.822 | 6.30E-01 | 6.30E+01 |  |  |
| 8176336 | NR_026711    | NCRNA00105 | non-protein coding RNA 105                                        | -0.075 | 0.949 | 5.34E-01 | 5.34E+01 |  |  |

|         |              |              |                                                                      |        |       |          |          |  |  |
|---------|--------------|--------------|----------------------------------------------------------------------|--------|-------|----------|----------|--|--|
| 8176342 | NR_027383    | SFRS17A      | splicing factor, arginine/serine-rich 17                             | -0.023 | 0.984 | 9.06E-01 | 9.06E+01 |  |  |
| 8176360 | NM_002414    | CD99         | CD99 molecule                                                        | -0.049 | 0.967 | 7.94E-01 | 7.94E+01 |  |  |
| 8176375 | NM_001008    | RPS4Y1       | ribosomal protein S4, Y-linked 1                                     | 0.211  | 1.157 | 9.40E-01 | 9.40E+01 |  |  |
| 8176384 | NM_003411    | ZFY          | zinc finger protein, Y-linked                                        | 0.023  | 1.016 | 9.85E-01 | 9.85E+01 |  |  |
| 8176395 | ---          | ---          | ---                                                                  | 0.079  | 1.056 | 5.57E-01 | 5.57E+01 |  |  |
| 8176427 | ---          | ---          | ---                                                                  | -0.015 | 0.990 | 9.50E-01 | 9.50E+01 |  |  |
| 8176460 | NM_002760    | PRKY         | protein kinase, Y-linked                                             | 0.102  | 1.073 | 8.57E-01 | 8.57E+01 |  |  |
| 8176469 | ---          | ---          | ---                                                                  | 0.292  | 1.224 | 7.69E-01 | 7.69E+01 |  |  |
| 8176566 | ---          | ---          | ---                                                                  | -0.033 | 0.977 | 8.87E-01 | 8.87E+01 |  |  |
| 8176570 | NM_00112738  | LOC653543    | double homeobox, 4-like                                              | -0.018 | 0.987 | 9.56E-01 | 9.56E+01 |  |  |
| 8176572 | ENST00000455 | FRG2C        | FSDH region gene 2 family, member 2                                  | 0.006  | 1.004 | 9.83E-01 | 9.83E+01 |  |  |
| 8176578 | NM_004654    | USP9Y        | ubiquitin specific peptidase 9, Y-linked                             | 0.138  | 1.100 | 9.53E-01 | 9.53E+01 |  |  |
| 8176624 | NM_00112266  | DDX3Y        | DEAD (Asp-Glu-Ala-Asp) box polypeptide 3, Y-linked                   | 0.286  | 1.220 | 9.11E-01 | 9.11E+01 |  |  |
| 8176644 | NM_004202    | TMSB4Y       | thymosin beta 4, Y-linked                                            | 0.013  | 1.009 | 9.45E-01 | 9.45E+01 |  |  |
| 8176648 | ---          | ---          | ---                                                                  | 0.022  | 1.015 | 8.35E-01 | 8.35E+01 |  |  |
| 8176650 | NM_004679    | VCY          | variable charge, Y-linked                                            | -0.032 | 0.978 | 8.13E-01 | 8.13E+01 |  |  |
| 8176655 | NM_014893    | NLGN4Y       | neuroligin 4, Y-linked                                               | 0.007  | 1.005 | 9.83E-01 | 9.83E+01 |  |  |
| 8176667 | ---          | ---          | ---                                                                  | -0.094 | 0.937 | 3.18E-01 | 3.18E+01 |  |  |
| 8176669 | ---          | ---          | ---                                                                  | 0.017  | 1.012 | 9.38E-01 | 9.38E+01 |  |  |
| 8176698 | NM_00100585  | CYorf15A     | chromosome Y open reading frame 15A                                  | 0.117  | 1.084 | 9.64E-01 | 9.64E+01 |  |  |
| 8176709 | NM_032576    | CYorf15B     | chromosome Y open reading frame 15B                                  | 0.189  | 1.140 | 9.25E-01 | 9.25E+01 |  |  |
| 8176719 | NM_004681    | EIF1AY       | eukaryotic translation initiation factor 1A, Y-linked                | 0.254  | 1.192 | 9.33E-01 | 9.33E+01 |  |  |
| 8176730 | NM_00103956  | RPS4Y2       | ribosomal protein S4, Y-linked 2                                     | 0.048  | 1.034 | 9.25E-01 | 9.25E+01 |  |  |
| 8176865 | BC032332     | PCMTD2       | protein-L-isoaspartate (D-aspartate) methyltransferase 2             | -0.038 | 0.974 | 9.00E-01 | 9.00E+01 |  |  |
| 8176910 | NR_001555    | GOLGA2LY1    | golgi autoantigen, golgin subfamily 1, Y-linked                      | -0.066 | 0.955 | 4.16E-01 | 4.16E+01 |  |  |
| 8176921 | ---          | ---          | ---                                                                  | -0.037 | 0.975 | 8.10E-01 | 8.10E+01 |  |  |
| 8176962 | NM_005638    | VAMP7        | vesicle-associated membrane protein 7                                | 0.087  | 1.062 | 5.78E-01 | 5.78E+01 |  |  |
| 8176972 | NR_024033    | IL9R         | interleukin 9 receptor                                               | -0.041 | 0.972 | 6.91E-01 | 6.91E+01 |  |  |
| 8176986 | NM_013239    | PPP2R3B      | protein phosphatase 2 (formerly 2A), regulatory subunit 3B           | 0.030  | 1.021 | 8.49E-01 | 8.49E+01 |  |  |
| 8177003 | NM_001636    | SLC25A6      | solute carrier family 25 (mitochondrial anion carrier) member 6      | 0.006  | 1.004 | 9.78E-01 | 9.78E+01 |  |  |
| 8177011 | NM_004192    | ASMTL        | acetylserotonin O-methyltransferase                                  | -0.060 | 0.959 | 5.17E-01 | 5.17E+01 |  |  |
| 8177026 | NM_178129    | P2RY8        | purinergic receptor P2Y, G-protein coupled 8                         | -0.098 | 0.934 | 7.08E-01 | 7.08E+01 |  |  |
| 8177029 | NM_004729    | ZBED1        | zinc finger, BED-type containing 1                                   | 0.009  | 1.006 | 9.54E-01 | 9.54E+01 |  |  |
| 8177046 | ---          | ---          | ---                                                                  | -0.060 | 0.960 | 7.98E-01 | 7.98E+01 |  |  |
| 8177114 | ---          | ---          | ---                                                                  | -0.015 | 0.990 | 9.50E-01 | 9.50E+01 |  |  |
| 8177120 | NM_00103351  | LOC100132288 | hypothetical protein LOC100132288                                    | -0.084 | 0.943 | 6.58E-01 | 6.58E+01 |  |  |
| 8177137 | NM_007125    | UTY          | ubiquitously transcribed tetratricopeptide repeat domain 1           | 0.094  | 1.068 | 9.66E-01 | 9.66E+01 |  |  |
| 8177169 | NM_004679    | VCY          | variable charge, Y-linked                                            | -0.032 | 0.978 | 8.13E-01 | 8.13E+01 |  |  |
| 8177189 | ---          | ---          | ---                                                                  | 0.017  | 1.012 | 9.38E-01 | 9.38E+01 |  |  |
| 8177191 | ---          | ---          | ---                                                                  | -0.094 | 0.937 | 3.18E-01 | 3.18E+01 |  |  |
| 8177217 | NR_001543    | TTYT14       | testis-specific transcript, Y-linked 14                              | 0.022  | 1.016 | 9.06E-01 | 9.06E+01 |  |  |
| 8177232 | NM_00114670  | KDM5D        | lysine (K)-specific demethylase 5D                                   | 0.139  | 1.101 | 8.99E-01 | 8.99E+01 |  |  |
| 8177344 | NR_001541    | TTYT5        | testis-specific transcript, Y-linked 5                               | 0.055  | 1.039 | 5.81E-01 | 5.81E+01 |  |  |
| 8177413 | NR_001555    | GOLGA2LY1    | golgi autoantigen, golgin subfamily 1, Y-linked                      | -0.066 | 0.955 | 4.16E-01 | 4.16E+01 |  |  |
| 8177424 | ---          | ---          | ---                                                                  | -0.037 | 0.975 | 8.10E-01 | 8.10E+01 |  |  |
| 8177460 | BC032332     | PCMTD2       | protein-L-isoaspartate (D-aspartate) methyltransferase 2             | -0.038 | 0.974 | 9.00E-01 | 9.00E+01 |  |  |
| 8177478 | NM_133338    | RAD17        | RAD17 homolog (S. pombe)                                             | 0.089  | 1.063 | 6.75E-01 | 6.75E+01 |  |  |
| 8177507 | NM_001515    | GTF2H2       | general transcription factor IIH, polypeptide 2                      | 0.084  | 1.060 | 6.91E-01 | 6.91E+01 |  |  |
| 8177527 | 0            | 0            | 0                                                                    | 0.462  | 1.377 | 7.90E-02 | 7.90E+00 |  |  |
| 8177544 | AK289851     | SMA5         | glucuronidase, beta pseudogene                                       | -0.005 | 0.996 | 9.87E-01 | 9.87E+01 |  |  |
| 8177560 | NM_018429    | BDP1         | B double prime 1, subunit of RNA polymerase II                       | -0.065 | 0.956 | 5.29E-01 | 5.29E+01 |  |  |
| 8177601 | NM_022132    | MCCC2        | methylcrotonoyl-Coenzyme A carboxyltransferase 2                     | 0.048  | 1.034 | 8.04E-01 | 8.04E+01 |  |  |
| 8177628 | NM_176816    | CCDC125      | coiled-coil domain containing 125                                    | 0.066  | 1.047 | 7.62E-01 | 7.62E+01 |  |  |
| 8177635 | NM_003187    | TAF9         | TAF9 RNA polymerase II, TATA box binding protein associated factor 9 | 0.047  | 1.033 | 6.82E-01 | 6.82E+01 |  |  |
| 8177647 | NM_000344    | SMN1         | survival of motor neuron 1, telomeric                                | -0.005 | 0.996 | 9.82E-01 | 9.82E+01 |  |  |
| 8177669 | BC171739     | GUSBL1       | glucuronidase, beta-like 1                                           | -0.026 | 0.982 | 9.37E-01 | 9.37E+01 |  |  |
| 8177674 | NM_001515    | GTF2H2       | general transcription factor IIH, polypeptide 2                      | 0.073  | 1.052 | 7.40E-01 | 7.40E+01 |  |  |
| 8177706 | NM_007160    | OR2H2        | olfactory receptor, family 2, subfamily 2, member 2                  | 0.047  | 1.033 | 8.21E-01 | 8.21E+01 |  |  |
| 8177717 | NM_018950    | HLA-F        | major histocompatibility complex, class II, F                        | -0.019 | 0.987 | 9.37E-01 | 9.37E+01 |  |  |
| 8177725 | NM_002127    | HLA-G        | major histocompatibility complex, class II, G                        | -0.011 | 0.992 | 9.56E-01 | 9.56E+01 |  |  |
| 8177732 | NM_002116    | HLA-A        | major histocompatibility complex, class II, A                        | -0.030 | 0.979 | 8.82E-01 | 8.82E+01 |  |  |
| 8177744 | NM_021959    | PPP1R11      | protein phosphatase 1, regulatory subunit 11                         | 0.021  | 1.015 | 9.35E-01 | 9.35E+01 |  |  |
| 8177750 | NM_138700    | TRIM40       | tripartite motif-containing 40                                       | -0.001 | 0.999 | 9.96E-01 | 9.96E+01 |  |  |
| 8177760 | NM_033229    | TRIM15       | tripartite motif-containing 15                                       | 0.029  | 1.020 | 7.47E-01 | 7.47E+01 |  |  |
| 8177770 | NM_172016    | TRIM39       | tripartite motif-containing 39                                       | -0.049 | 0.967 | 7.38E-01 | 7.38E+01 |  |  |
| 8177782 | NM_024839    | RPP21        | ribonuclease P/MRP 21kDa subunit                                     | -0.097 | 0.935 | 5.78E-01 | 5.78E+01 |  |  |
| 8177788 | NM_005516    | HLA-E        | major histocompatibility complex, class II, E                        | 0.027  | 1.019 | 8.97E-01 | 8.97E+01 |  |  |
| 8177797 | NM_00102509  | ABCF1        | ATP-binding cassette, sub-family F, member 1                         | -0.130 | 0.914 | 1.10E-01 | 1.10E+01 |  |  |
| 8177824 | NM_014046    | MRPS18B      | mitochondrial ribosomal protein S18, beta                            | 0.027  | 1.019 | 9.07E-01 | 9.07E+01 |  |  |
| 8177834 | NM_024909    | C6orf134     | chromosome 6 open reading frame 134                                  | -0.132 | 0.913 | 3.89E-01 | 3.89E+01 |  |  |
| 8177851 | NM_00116137  | C6orf136     | chromosome 6 open reading frame 136                                  | -0.067 | 0.954 | 6.89E-01 | 6.89E+01 |  |  |
| 8177858 | NM_178014    | TUBB         | tubulin, beta                                                        | -0.094 | 0.937 | 7.04E-01 | 7.04E+01 |  |  |
| 8177867 | NM_013993    | DDR1         | discoidin domain receptor tyrosine kinase 1                          | 0.009  | 1.006 | 9.54E-01 | 9.54E+01 |  |  |
| 8177885 | NM_001517    | GTF2H4       | general transcription factor IIH, polypeptide 4                      | 0.015  | 1.010 | 9.27E-01 | 9.27E+01 |  |  |
| 8177901 | NM_020442    | VARS2        | valyl-tRNA synthetase 2, mitochondrial                               | -0.009 | 0.994 | 9.55E-01 | 9.55E+01 |  |  |
| 8177931 | NM_00101090  | MUC21        | mucin 21, cell surface associated                                    | -0.048 | 0.967 | 6.34E-01 | 6.34E+01 |  |  |
| 8177947 | NM_007109    | TCF19        | transcription factor 19                                              | -0.040 | 0.973 | 8.06E-01 | 8.06E+01 |  |  |



|         |             |          |                                         |        |       |          |          |  |  |
|---------|-------------|----------|-----------------------------------------|--------|-------|----------|----------|--|--|
| 8177951 | NR_026791   | HCG27    | HLA complex group 27                    | 0.114  | 1.082 | 2.72E-01 | 2.72E+01 |  |  |
| 8177955 | NM_005931   | MICB     | MHC class I polypeptide-related se      | 0.014  | 1.009 | 9.55E-01 | 9.55E+01 |  |  |
| 8177964 | NM_00101170 | MCCD1    | mitochondrial coiled-coil domain 1      | 0.046  | 1.032 | 7.27E-01 | 7.27E+01 |  |  |
| 8177967 | NM_005007   | NFKBIL1  | nuclear factor of kappa light polyp     | -0.066 | 0.955 | 5.87E-01 | 5.87E+01 |  |  |
| 8177976 | NM_000595   | LTA      | lymphotoxin alpha (TNF superfam         | -0.026 | 0.982 | 9.01E-01 | 9.01E+01 |  |  |
| 8177983 | NM_000594   | TNF      | tumor necrosis factor (TNF superfa      | -0.138 | 0.909 | 5.35E-01 | 5.35E+01 |  |  |
| 8178011 | NM_080686   | BAT2     | HLA-B associated transcript 2           | -0.016 | 0.989 | 8.96E-01 | 8.96E+01 |  |  |
| 8178043 | NM_019101   | APOM     | apolipoprotein M                        | -0.007 | 0.995 | 9.76E-01 | 9.76E+01 |  |  |
| 8178050 | NM_001320   | CSNK2B   | casein kinase 2, beta polypeptide       | 0.094  | 1.068 | 3.90E-01 | 3.90E+01 |  |  |
| 8178059 | NM_021221   | LY6G5B   | lymphocyte antigen 6 complex, loc       | -0.033 | 0.977 | 9.34E-01 | 9.34E+01 |  |  |
| 8178063 | NM_00100369 | LY6G6F   | lymphocyte antigen 6 complex, loc       | -0.034 | 0.977 | 8.07E-01 | 8.07E+01 |  |  |
| 8178070 | NM_021246   | LY6G6D   | lymphocyte antigen 6 complex, loc       | 0.070  | 1.050 | 5.81E-01 | 5.81E+01 |  |  |
| 8178074 | NM_138277   | C6orf25  | chromosome 6 open reading fram          | -0.069 | 0.953 | 5.61E-01 | 5.61E+01 |  |  |
| 8178080 | BC137541    | C6orf26  | chromosome 6 open reading fram          | -0.004 | 0.997 | 9.85E-01 | 9.85E+01 |  |  |
| 8178090 | NM_00104043 | C6orf48  | chromosome 6 open reading fram          | -0.061 | 0.959 | 7.44E-01 | 7.44E+01 |  |  |
| 8178115 | NM_001710   | CFB      | complement factor B                     | -0.262 | 0.834 | 6.65E-01 | 6.65E+01 |  |  |
| 8178136 | NM_006929   | SKIV2L   | superkiller viralicidic activity 2-like | -0.058 | 0.961 | 6.62E-01 | 6.62E+01 |  |  |
| 8178164 | NR_026717   | STK19    | serine/threonine kinase 19              | -0.028 | 0.981 | 8.96E-01 | 8.96E+01 |  |  |
| 8178177 | NM_000500   | CYP21A2  | cytochrome P450, family 21, subfa       | -0.003 | 0.998 | 9.86E-01 | 9.86E+01 |  |  |
| 8178188 | NR_003129   | RNF5P1   | ring finger protein 5 pseudogene 1      | -0.002 | 0.999 | 9.94E-01 | 9.94E+01 |  |  |
| 8178199 | 0           | 0        | 0                                       | 0.339  | 1.265 | 1.30E-01 | 1.30E+01 |  |  |
| 8178205 | NM_020056   | HLA-DQA2 | major histocompatibility complex,       | 0.230  | 1.173 | 3.75E-01 | 3.75E+01 |  |  |
| 8178211 | NM_002800   | PSMB9    | proteasome (prosome, macropain          | 0.138  | 1.101 | 3.90E-01 | 3.90E+01 |  |  |
| 8178225 | NM_006979   | SLC39A7  | solute carrier family 39 (zinc trans    | -0.066 | 0.955 | 6.81E-01 | 6.81E+01 |  |  |
| 8178234 | NM_014234   | HSD17B8  | hydroxysteroid (17-beta) dehydro        | 0.041  | 1.029 | 8.57E-01 | 8.57E+01 |  |  |
| 8178244 | NM_002931   | RING1    | ring finger protein 1                   | -0.034 | 0.977 | 8.52E-01 | 8.52E+01 |  |  |
| 8178253 | NM_022551   | RPS18    | ribosomal protein S18                   | 0.020  | 1.014 | 9.23E-01 | 9.23E+01 |  |  |
| 8178264 | NM_003782   | B3GALT4  | UDP-Gal:betaGlcNAc beta 1,3-gala        | 0.012  | 1.008 | 9.54E-01 | 9.54E+01 |  |  |
| 8178270 | NM_014260   | PFDN6    | prefoldin subunit 6                     | 0.032  | 1.022 | 8.91E-01 | 8.91E+01 |  |  |
| 8178295 | NM_006398   | UBD      | ubiquitin D                             | 0.049  | 1.034 | 9.17E-01 | 9.17E+01 |  |  |
| 8178298 | NM_001470   | GABBR1   | gamma-aminobutyric acid (GABA)          | 0.046  | 1.032 | 7.87E-01 | 7.87E+01 |  |  |
| 8178322 | NM_006937   | SUMO2    | SMT3 suppressor of mif two 3 hom        | -0.012 | 0.992 | 9.44E-01 | 9.44E+01 |  |  |
| 8178326 | NM_025236   | RNF39    | ring finger protein 39                  | -0.032 | 0.978 | 7.91E-01 | 7.91E+01 |  |  |
| 8178330 | NM_007028   | TRIM31   | tripartite motif-containing 31          | -0.042 | 0.972 | 6.88E-01 | 6.88E+01 |  |  |
| 8178338 | NM_006778   | TRIM10   | tripartite motif-containing 10          | -0.089 | 0.940 | 4.60E-01 | 4.60E+01 |  |  |
| 8178346 | NM_005275   | GNL1     | guanine nucleotide binding protei       | -0.113 | 0.924 | 2.59E-01 | 2.59E+01 |  |  |
| 8178358 | NM_002714   | PPP1R10  | protein phosphatase 1, regulatory       | -0.121 | 0.919 | 1.09E-01 | 1.09E+01 |  |  |
| 8178377 | NM_003587   | DHX16    | DEAH (Asp-Glu-Ala-His) box polyp        | 0.037  | 1.026 | 7.14E-01 | 7.14E+01 |  |  |
| 8178399 | NM_007243   | NRM      | nurim (nuclear envelope membra          | -0.065 | 0.956 | 6.38E-01 | 6.38E+01 |  |  |
| 8178404 | NM_014641   | MDC1     | mediator of DNA-damage checkpo          | -0.103 | 0.931 | 3.80E-01 | 3.80E+01 |  |  |
| 8178419 | NM_005803   | FLOT1    | flotillin 1                             | 0.030  | 1.021 | 9.06E-01 | 9.06E+01 |  |  |
| 8178439 | NM_014070   | C6orf15  | chromosome 6 open reading fram          | -0.072 | 0.951 | 4.93E-01 | 4.93E+01 |  |  |
| 8178442 | NM_001264   | CDSN     | corneodesmosin                          | -0.031 | 0.979 | 8.23E-01 | 8.23E+01 |  |  |
| 8178445 | NM_014069   | PSORS1C2 | psoriasis susceptibility 1 candidate    | 0.043  | 1.030 | 6.91E-01 | 6.91E+01 |  |  |
| 8178448 | NM_00110556 | CCHCR1   | coiled-coil alpha-helical rod protei    | -0.104 | 0.931 | 1.23E-01 | 1.23E+01 |  |  |
| 8178470 | NM_002701   | POU5F1   | POU class 5 homeobox 1                  | 0.002  | 1.001 | 9.89E-01 | 9.89E+01 |  |  |
| 8178476 | NM_004640   | BAT1     | HLA-B associated transcript 1           | -0.049 | 0.966 | 5.26E-01 | 5.26E+01 |  |  |
| 8178489 | 0           | 0        | 0                                       | 0.017  | 1.012 | 9.19E-01 | 9.19E+01 |  |  |
| 8178498 | NM_005514   | HLA-B    | major histocompatibility complex,       | -0.001 | 0.999 | 9.96E-01 | 9.96E+01 |  |  |
| 8178508 | NM_130463   | ATP6V1G2 | ATPase, H+ transporting, lysosoma       | 0.042  | 1.029 | 8.08E-01 | 8.08E+01 |  |  |
| 8178512 | NM_002341   | LTB      | lymphotoxin beta (TNF superfamil        | -0.049 | 0.966 | 6.99E-01 | 6.99E+01 |  |  |
| 8178517 | NM_00114546 | NCR3     | natural cytotoxicity triggering rece    | 0.005  | 1.003 | 9.78E-01 | 9.78E+01 |  |  |
| 8178526 | NM_004639   | BAT3     | HLA-B associated transcript 3           | -0.009 | 0.994 | 9.70E-01 | 9.70E+01 |  |  |
| 8178552 | NM_021184   | C6orf47  | chromosome 6 open reading fram          | -0.041 | 0.972 | 7.97E-01 | 7.97E+01 |  |  |
| 8178554 | NM_025262   | LY6G5C   | lymphocyte antigen 6 complex, loc       | -0.173 | 0.887 | 7.99E-02 | 7.99E+00 |  |  |
| 8178561 | NM_021160   | BAT5     | HLA-B associated transcript 5           | 0.037  | 1.026 | 6.94E-01 | 6.94E+01 |  |  |
| 8178582 | NR_003673   | LY6G6E   | lymphocyte antigen 6 complex, loc       | -0.046 | 0.968 | 6.58E-01 | 6.58E+01 |  |  |
| 8178586 | NM_025261   | LY6G6C   | lymphocyte antigen 6 complex, loc       | 0.001  | 1.001 | 9.96E-01 | 9.96E+01 |  |  |
| 8178590 | NM_013974   | DDAH2    | dimethylarginine dimethylaminoh         | 0.141  | 1.103 | 8.98E-02 | 8.98E+00 |  |  |
| 8178598 | NM_001288   | CLIC1    | chloride intracellular channel 1        | 0.226  | 1.170 | 2.91E-01 | 2.91E+01 |  |  |
| 8178609 | NM_006295   | VAR5     | valyl-tRNA synthetase                   | 0.054  | 1.038 | 7.03E-01 | 7.03E+01 |  |  |
| 8178641 | NM_021177   | LSM2     | LSM2 homolog, U6 small nuclear R        | 0.119  | 1.086 | 3.35E-01 | 3.35E+01 |  |  |
| 8178650 | NM_005527   | HSPA1L   | heat shock 70kDa protein 1-like         | -0.108 | 0.928 | 6.09E-01 | 6.09E+01 |  |  |
| 8178653 | NM_025257   | SLC44A4  | solute carrier family 44, member 4      | -0.028 | 0.981 | 8.38E-01 | 8.38E+01 |  |  |
| 8178676 | NM_000434   | NEU1     | sialidase 1 (lysosomal sialidase)       | -0.074 | 0.950 | 7.53E-01 | 7.53E+01 |  |  |
| 8178683 | NM_181842   | ZBTB12   | zinc finger and BTB domain contai       | -0.019 | 0.987 | 8.38E-01 | 8.38E+01 |  |  |
| 8178686 | NM_002904   | RDBP     | RD RNA binding protein                  | -0.076 | 0.948 | 4.81E-01 | 4.81E+01 |  |  |
| 8178699 | NM_005510   | DOM3Z    | dom-3 homolog Z (C. elegans)            | -0.102 | 0.932 | 4.34E-01 | 4.34E+01 |  |  |
| 8178712 | NM_032470   | TNXB     | tenascin XB                             | -0.030 | 0.979 | 8.13E-01 | 8.13E+01 |  |  |
| 8178727 | NM_004381   | ATF6B    | activating transcription factor 6 be    | -0.058 | 0.961 | 6.74E-01 | 6.74E+01 |  |  |
| 8178749 | NM_022110   | FKBP1    | FK506 binding protein like              | -0.038 | 0.974 | 8.27E-01 | 8.27E+01 |  |  |
| 8178754 | NM_030651   | PRRT1    | proline-rich transmembrane prote        | -0.005 | 0.997 | 9.82E-01 | 9.82E+01 |  |  |
| 8178762 | NM_006411   | AGPAT1   | 1-acylglycerol-3-phosphate O-acyl       | -0.040 | 0.973 | 7.73E-01 | 7.73E+01 |  |  |
| 8178771 | NM_001136   | AGER     | advanced glycosylation end produ        | -0.024 | 0.983 | 8.84E-01 | 8.84E+01 |  |  |
| 8178790 | NM_022107   | GPSM3    | G-protein signaling modulator 3 (A      | -0.016 | 0.989 | 9.39E-01 | 9.39E+01 |  |  |
| 8178795 | NM_019602   | BTNL2    | butyrophilin-like 2 (MHC class II as    | -0.064 | 0.957 | 5.65E-01 | 5.65E+01 |  |  |
| 8178802 | 0           | 0        | 0                                       | 0.420  | 1.338 | 9.93E-02 | 9.93E+00 |  |  |

|         |                             |           |                                         |   |        |       |          |          |  |  |
|---------|-----------------------------|-----------|-----------------------------------------|---|--------|-------|----------|----------|--|--|
| 8178811 |                             | 0         | 0                                       | 0 | 0.451  | 1.367 | 6.36E-02 | 6.36E+00 |  |  |
| 8178826 |                             | 0         | 0                                       | 0 | 0.436  | 1.352 | 6.06E-02 | 6.06E+00 |  |  |
| 8178833 | NM_002120                   | HLA-DOB   | major histocompatibility complex,       |   | -0.029 | 0.980 | 9.34E-01 | 9.34E+01 |  |  |
| 8178841 | NM_018833                   | TAP2      | transporter 2, ATP-binding cassett      |   | 0.017  | 1.012 | 9.54E-01 | 9.54E+01 |  |  |
| 8178855 | NM_004159                   | PSMB8     | proteasome (prosome, macropain          |   | 0.149  | 1.109 | 2.29E-01 | 2.29E+01 |  |  |
| 8178867 | NM_000593                   | TAP1      | transporter 1, ATP-binding cassett      |   | 0.068  | 1.048 | 6.66E-01 | 6.66E+01 |  |  |
| 8178882 | AF275684 // A1R2P1 // PPP1F |           | protein phosphatase 1, regulatory       |   | -0.051 | 0.965 | 7.26E-01 | 7.26E+01 |  |  |
| 8178897 | NM_080680                   | COL11A2   | collagen, type XI, alpha 2              |   | -0.117 | 0.922 | 3.87E-01 | 3.87E+01 |  |  |
| 8178903 | NM_021976                   | RXRBR     | retinoid X receptor, beta               |   | 0.011  | 1.008 | 9.53E-01 | 9.53E+01 |  |  |
| 8178917 | NM_022553                   | VPS52     | vacuolar protein sorting 52 homol       |   | 0.070  | 1.050 | 5.13E-01 | 5.13E+01 |  |  |
| 8178939 | NM_005452                   | WDR46     | WD repeat domain 46                     |   | -0.062 | 0.958 | 6.40E-01 | 6.40E+01 |  |  |
| 8178955 | NM_004761                   | RLG2      | ral guanine nucleotide dissociation     |   | -0.102 | 0.932 | 3.18E-01 | 3.18E+01 |  |  |
| 8178977 | NM_172208                   | TAPBP     | TAP binding protein (tapasin)           |   | 0.060  | 1.042 | 6.78E-01 | 6.78E+01 |  |  |
| 8178988 | NM_005453                   | ZBTB22    | zinc finger and BTB domain contain      |   | -0.086 | 0.942 | 3.98E-01 | 3.98E+01 |  |  |
| 8178991 | NM_00114196                 | DAXX      | death-domain associated protein         |   | -0.024 | 0.984 | 8.93E-01 | 8.93E+01 |  |  |
| 8179009 | NM_007160                   | OR2H2     | olfactory receptor, family 2, subfa     |   | 0.047  | 1.033 | 8.21E-01 | 8.21E+01 |  |  |
| 8179019 | NM_018950                   | HLA-F     | major histocompatibility complex,       |   | -0.020 | 0.986 | 9.28E-01 | 9.28E+01 |  |  |
| 8179028 | AK128290                    | LOC554223 | hypothetical LOC554223                  |   | 0.060  | 1.043 | 6.69E-01 | 6.69E+01 |  |  |
| 8179034 | NM_002127                   | HLA-G     | major histocompatibility complex,       |   | -0.011 | 0.992 | 9.56E-01 | 9.56E+01 |  |  |
| 8179041 |                             | 0         | 0                                       | 0 | -0.028 | 0.981 | 8.20E-01 | 8.20E+01 |  |  |
| 8179049 | NR_024240                   | HLA-J     | major histocompatibility complex,       |   | -0.015 | 0.990 | 9.31E-01 | 9.31E+01 |  |  |
| 8179055 | NM_170783                   | ZNRD1     | zinc ribbon domain containing 1         |   | -0.064 | 0.957 | 7.51E-01 | 7.51E+01 |  |  |
| 8179060 | NM_138700                   | TRIM40    | tripartite motif-containing 40          |   | -0.001 | 0.999 | 9.96E-01 | 9.96E+01 |  |  |
| 8179070 | NM_033229                   | TRIM15    | tripartite motif-containing 15          |   | 0.029  | 1.020 | 7.47E-01 | 7.47E+01 |  |  |
| 8179080 | NR_027822                   | HLA-L     | major histocompatibility complex,       |   | -0.044 | 0.970 | 8.03E-01 | 8.03E+01 |  |  |
| 8179088 | NM_172016                   | TRIM39    | tripartite motif-containing 39          |   | -0.049 | 0.967 | 7.38E-01 | 7.38E+01 |  |  |
| 8179097 | NM_024839                   | RPP21     | ribonuclease P/MRP 21kDa subun          |   | -0.097 | 0.935 | 5.78E-01 | 5.78E+01 |  |  |
| 8179103 | NM_005516                   | HLA-E     | major histocompatibility complex,       |   | 0.027  | 1.019 | 8.97E-01 | 8.97E+01 |  |  |
| 8179112 | NM_00102509                 | ABCF1     | ATP-binding cassette, sub-family F      |   | -0.130 | 0.914 | 1.10E-01 | 1.10E+01 |  |  |
| 8179139 | NM_014046                   | MRPS18B   | mitochondrial ribosomal protein S       |   | 0.027  | 1.019 | 9.07E-01 | 9.07E+01 |  |  |
| 8179149 | NM_024909                   | C6orf134  | chromosome 6 open reading fram          |   | -0.122 | 0.919 | 4.09E-01 | 4.09E+01 |  |  |
| 8179167 | NM_00116137                 | C6orf136  | chromosome 6 open reading fram          |   | -0.067 | 0.954 | 6.89E-01 | 6.89E+01 |  |  |
| 8179174 | NM_178014                   | TUBB      | tubulin, beta                           |   | -0.094 | 0.937 | 7.04E-01 | 7.04E+01 |  |  |
| 8179184 | NM_013993                   | DDR1      | discoidin domain receptor tyrosine      |   | 0.010  | 1.007 | 9.51E-01 | 9.51E+01 |  |  |
| 8179205 | NM_001517                   | GTF2H4    | general transcription factor IIH, po    |   | 0.015  | 1.010 | 9.27E-01 | 9.27E+01 |  |  |
| 8179221 | NM_080870                   | DPCR1     | diffuse panbronchiolitis critical reg   |   | -0.001 | 0.999 | 9.94E-01 | 9.94E+01 |  |  |
| 8179224 | NM_00101090                 | MUC21     | mucin 21, cell surface associated       |   | -0.026 | 0.982 | 8.32E-01 | 8.32E+01 |  |  |
| 8179228 | NM_007109                   | TCF19     | transcription factor 19                 |   | -0.028 | 0.981 | 8.78E-01 | 8.78E+01 |  |  |
| 8179235 | NR_026791                   | HCG27     | HLA complex group 27                    |   | 0.147  | 1.108 | 1.93E-01 | 1.93E+01 |  |  |
| 8179246 | NM_00101170                 | MCCD1     | mitochondrial coiled-coil domain 1      |   | 0.046  | 1.032 | 7.27E-01 | 7.27E+01 |  |  |
| 8179249 | NM_005007                   | NFKBIL1   | nuclear factor of kappa light polyp     |   | -0.066 | 0.955 | 5.87E-01 | 5.87E+01 |  |  |
| 8179258 | NM_00115974                 | LTA       | lymphotoxin alpha (TNF superfam         |   | 0.035  | 1.025 | 9.00E-01 | 9.00E+01 |  |  |
| 8179263 | NM_000594                   | TNF       | tumor necrosis factor (TNF superfa      |   | -0.138 | 0.909 | 5.35E-01 | 5.35E+01 |  |  |
| 8179291 | NM_019101                   | APOM      | apolipoprotein M                        |   | -0.007 | 0.995 | 9.76E-01 | 9.76E+01 |  |  |
| 8179298 | NM_001320                   | CSNK2B    | casein kinase 2, beta polypeptide       |   | 0.083  | 1.059 | 4.53E-01 | 4.53E+01 |  |  |
| 8179309 | NM_021246                   | LY6G6D    | lymphocyte antigen 6 complex, loc       |   | 0.070  | 1.050 | 5.81E-01 | 5.81E+01 |  |  |
| 8179313 | NM_138277                   | C6orf25   | chromosome 6 open reading fram          |   | -0.041 | 0.972 | 7.35E-01 | 7.35E+01 |  |  |
| 8179322 | NM_005345                   | HSPA1A    | heat shock 70kDa protein 1A             |   | -0.295 | 0.815 | 2.41E-03 | 2.41E-01 |  |  |
| 8179326 | NM_00104043                 | C6orf48   | chromosome 6 open reading fram          |   | -0.061 | 0.959 | 7.44E-01 | 7.44E+01 |  |  |
| 8179351 | NM_001710                   | CFB       | complement factor B                     |   | -0.113 | 0.924 | 7.77E-01 | 7.77E+01 |  |  |
| 8179364 | NM_006929                   | SKIV2L    | superkiller viralicidic activity 2-like |   | -0.081 | 0.945 | 4.91E-01 | 4.91E+01 |  |  |
| 8179391 | NR_026717                   | STK19     | serine/threonine kinase 19              |   | -0.017 | 0.988 | 9.53E-01 | 9.53E+01 |  |  |
| 8179440 | NM_000500                   | CYP21A2   | cytochrome P450, family 21, subfa       |   | -0.003 | 0.998 | 9.86E-01 | 9.86E+01 |  |  |
| 8179451 | NM_005155                   | PPT2      | palmitoyl-protein thioesterase 2        |   | -0.041 | 0.972 | 6.96E-01 | 6.96E+01 |  |  |
| 8179472 | NM_006913                   | RNF5      | ring finger protein 5                   |   | -0.032 | 0.978 | 8.54E-01 | 8.54E+01 |  |  |
| 8179489 |                             | 0         | 0                                       | 0 | 0.339  | 1.265 | 1.30E-01 | 1.30E+01 |  |  |
| 8179495 | NM_002800                   | PSMB9     | proteasome (prosome, macropain          |   | 0.138  | 1.101 | 3.90E-01 | 3.90E+01 |  |  |
| 8179504 | NM_005104                   | BRD2      | bromodomain containing 2                |   | -0.108 | 0.928 | 1.76E-01 | 1.76E+01 |  |  |
| 8179525 | NM_006979                   | SLC39A7   | solute carrier family 39 (zinc trans    |   | -0.066 | 0.955 | 6.81E-01 | 6.81E+01 |  |  |
| 8179534 | NM_014234                   | HSD17B8   | hydroxysteroid (17-beta) dehydro        |   | 0.041  | 1.029 | 8.57E-01 | 8.57E+01 |  |  |
| 8179544 | NM_022551                   | RPS18     | ribosomal protein S18                   |   | 0.020  | 1.014 | 9.23E-01 | 9.23E+01 |  |  |
| 8179555 | NM_003782                   | B3GALT4   | UDP-Gal:beta-GlcNAc beta 1,3-gala       |   | 0.012  | 1.008 | 9.54E-01 | 9.54E+01 |  |  |
| 8179559 | NM_014260                   | PFDN6     | prefoldin subunit 6                     |   | 0.032  | 1.022 | 8.91E-01 | 8.91E+01 |  |  |
| 8179564 | NM_002263                   | KIFC1     | kinesin family member C1                |   | 0.026  | 1.018 | 9.02E-01 | 9.02E+01 |  |  |
| 8179575 | NM_006510                   | TRIM27    | tripartite motif-containing 27          |   | 0.020  | 1.014 | 8.79E-01 | 8.79E+01 |  |  |
| 8179595 | NM_001470                   | GABBR1    | gamma-aminobutyric acid (GABA)          |   | 0.058  | 1.041 | 7.35E-01 | 7.35E+01 |  |  |
| 8179617 | NM_007028                   | TRIM31    | tripartite motif-containing 31          |   | -0.035 | 0.976 | 8.25E-01 | 8.25E+01 |  |  |
| 8179628 | NM_006778                   | TRIM10    | tripartite motif-containing 10          |   | -0.101 | 0.933 | 2.02E-01 | 2.02E+01 |  |  |
| 8179638 | NM_003449                   | TRIM26    | tripartite motif-containing 26          |   | 0.048  | 1.034 | 7.19E-01 | 7.19E+01 |  |  |
| 8179648 | NM_005275                   | GNL1      | guanine nucleotide binding protei       |   | -0.110 | 0.927 | 2.58E-01 | 2.58E+01 |  |  |
| 8179664 | NM_002714                   | PPP1R10   | protein phosphatase 1, regulatory       |   | -0.121 | 0.919 | 1.09E-01 | 1.09E+01 |  |  |
| 8179683 | NM_007243                   | NRM       | nurim (nuclear envelope membra          |   | -0.065 | 0.956 | 6.38E-01 | 6.38E+01 |  |  |
| 8179688 | NM_005803                   | FLOT1     | flotillin 1                             |   | 0.030  | 1.021 | 9.06E-01 | 9.06E+01 |  |  |
| 8179709 | NM_205854                   | SFTA2     | surfactant associated 2                 |   | -0.012 | 0.992 | 9.53E-01 | 9.53E+01 |  |  |
| 8179713 | NM_014070                   | C6orf15   | chromosome 6 open reading fram          |   | -0.062 | 0.958 | 5.93E-01 | 5.93E+01 |  |  |
| 8179716 | NM_001264                   | CDSN      | corneodesmosin                          |   | -0.010 | 0.993 | 9.49E-01 | 9.49E+01 |  |  |
| 8179719 | NM_002701                   | POU5F1    | POU class 5 homeobox 1                  |   | -0.020 | 0.986 | 8.41E-01 | 8.41E+01 |  |  |

|         |                               |          |                                                      |  |        |       |          |          |  |  |
|---------|-------------------------------|----------|------------------------------------------------------|--|--------|-------|----------|----------|--|--|
| 8179731 |                               | 0        | 0                                                    |  | -0.005 | 0.996 | 9.79E-01 | 9.79E+01 |  |  |
| 8179750 | NM_004640                     | BAT1     | HLA-B associated transcript 1                        |  | -0.050 | 0.966 | 4.96E-01 | 4.96E+01 |  |  |
| 8179762 | NM_130463                     | ATP6V1G2 | ATPase, H+ transporting, lysosomal                   |  | 0.022  | 1.016 | 9.09E-01 | 9.09E+01 |  |  |
| 8179768 | NM_002341                     | LTB      | lymphotoxin beta (TNF superfamily)                   |  | -0.049 | 0.966 | 6.99E-01 | 6.99E+01 |  |  |
| 8179773 | NM_00114546                   | NCR3     | natural cytotoxicity triggering receptor 3           |  | 0.005  | 1.003 | 9.78E-01 | 9.78E+01 |  |  |
| 8179782 | NM_004639                     | BAT3     | HLA-B associated transcript 3                        |  | -0.009 | 0.994 | 9.70E-01 | 9.70E+01 |  |  |
| 8179808 | NM_021184                     | C6orf47  | chromosome 6 open reading frame 47                   |  | -0.041 | 0.972 | 7.97E-01 | 7.97E+01 |  |  |
| 8179810 | NR_003673                     | LY6G6E   | lymphocyte antigen 6 complex, epsilon                |  | -0.046 | 0.968 | 6.58E-01 | 6.58E+01 |  |  |
| 8179814 | NM_025261                     | LY6G6C   | lymphocyte antigen 6 complex, gamma                  |  | -0.002 | 0.999 | 9.94E-01 | 9.94E+01 |  |  |
| 8179819 | NM_013974                     | DDAH2    | dimethylarginine dimethylaminohydrolase 2            |  | 0.141  | 1.103 | 8.98E-02 | 8.98E+00 |  |  |
| 8179827 | NM_001288                     | CLIC1    | chloride intracellular channel 1                     |  | 0.233  | 1.176 | 2.35E-01 | 2.35E+01 |  |  |
| 8179839 | NM_021177                     | LSM2     | LSM2 homolog, U6 small nuclear ribonucleoprotein     |  | 0.119  | 1.086 | 3.35E-01 | 3.35E+01 |  |  |
| 8179848 | NM_005527                     | HSPA1L   | heat shock 70kDa protein 1-like                      |  | -0.108 | 0.928 | 6.09E-01 | 6.09E+01 |  |  |
| 8179851 | NM_000434                     | NEU1     | sialidase 1 (lysosomal sialidase)                    |  | -0.015 | 0.990 | 9.64E-01 | 9.64E+01 |  |  |
| 8179861 | NM_025257                     | SLC44A4  | solute carrier family 44, member 4                   |  | -0.028 | 0.981 | 8.38E-01 | 8.38E+01 |  |  |
| 8179884 | NM_006709                     | EHMT2    | euchromatic histone-lysine N-methyltransferase 2     |  | -0.134 | 0.911 | 2.91E-02 | 2.91E+00 |  |  |
| 8179913 | NM_002904                     | RDBP     | RD RNA binding protein                               |  | -0.076 | 0.948 | 4.81E-01 | 4.81E+01 |  |  |
| 8179926 | NM_005510                     | DOM3Z    | dom-3 homolog Z (C. elegans)                         |  | -0.110 | 0.927 | 4.68E-01 | 4.68E+01 |  |  |
| 8179935 | NM_032470                     | TNXB     | tenascin XB                                          |  | -0.030 | 0.979 | 8.13E-01 | 8.13E+01 |  |  |
| 8179950 | NM_030651                     | PRRT1    | proline-rich transmembrane protein 1                 |  | -0.005 | 0.997 | 9.82E-01 | 9.82E+01 |  |  |
| 8179958 | NM_006411                     | AGPAT1   | 1-acylglycerol-3-phosphate O-acyltransferase 1       |  | -0.040 | 0.973 | 7.73E-01 | 7.73E+01 |  |  |
| 8179967 | NM_001136                     | AGER     | advanced glycosylation end product specific receptor |  | -0.010 | 0.993 | 9.60E-01 | 9.60E+01 |  |  |
| 8179987 | NM_022107                     | GPSM3    | G-protein signaling modulator 3 (A)                  |  | -0.003 | 0.998 | 9.86E-01 | 9.86E+01 |  |  |
| 8179996 | NM_019602                     | BTNL2    | butyrophilin-like 2 (MHC class II associated)        |  | -0.064 | 0.957 | 5.65E-01 | 5.65E+01 |  |  |
| 8180003 |                               | 0        | 0                                                    |  | 0.441  | 1.357 | 5.88E-02 | 5.88E+00 |  |  |
| 8180022 |                               | 0        | 0                                                    |  | 0.436  | 1.352 | 6.06E-02 | 6.06E+00 |  |  |
| 8180029 | NR_003937                     | HLA-DQB2 | major histocompatibility complex, class II, DQB2     |  | 0.201  | 1.149 | 1.16E-01 | 1.16E+01 |  |  |
| 8180034 | NM_000544                     | TAP2     | transporter 2, ATP-binding cassette, normal          |  | 0.045  | 1.031 | 8.48E-01 | 8.48E+01 |  |  |
| 8180049 | NM_004159                     | PSMB8    | proteasome (prosome, macropain) subunit type 8       |  | 0.149  | 1.109 | 2.29E-01 | 2.29E+01 |  |  |
| 8180061 | NM_000593                     | TAP1     | transporter 1, ATP-binding cassette, normal          |  | 0.068  | 1.048 | 6.66E-01 | 6.66E+01 |  |  |
| 8180076 | AF275684 // ALR2P1 // PPP1R1B |          | protein phosphatase 1, regulatory subunit 1B         |  | -0.051 | 0.965 | 7.26E-01 | 7.26E+01 |  |  |
| 8180093 | NM_002119                     | HLA-DOA  | major histocompatibility complex, class II, DOA      |  | 0.105  | 1.076 | 2.29E-01 | 2.29E+01 |  |  |
| 8180105 | NM_080680                     | COL11A2  | collagen, type XI, alpha 2                           |  | -0.117 | 0.922 | 3.87E-01 | 3.87E+01 |  |  |
| 8180111 | NM_021976                     | RXRB     | retinoid X receptor, beta                            |  | 0.018  | 1.012 | 9.19E-01 | 9.19E+01 |  |  |
| 8180123 | NM_022553                     | VP52     | vacuolar protein sorting 52 homolog                  |  | 0.065  | 1.046 | 5.50E-01 | 5.50E+01 |  |  |
| 8180144 | NM_004761                     | RGL2     | ral guanine nucleotide dissociation stimulator 2     |  | -0.102 | 0.932 | 3.18E-01 | 3.18E+01 |  |  |
| 8180166 | NM_003190                     | TAPBP    | TAP binding protein (tapasin)                        |  | 0.029  | 1.020 | 8.40E-01 | 8.40E+01 |  |  |
| 8180179 | NM_00114196                   | DAXX     | death-domain associated protein                      |  | -0.018 | 0.987 | 9.21E-01 | 9.21E+01 |  |  |
| 8180192 | ---                           | ---      | ---                                                  |  | 0.008  | 1.006 | 9.13E-01 | 9.13E+01 |  |  |
| 8180193 | ---                           | ---      | ---                                                  |  | 0.001  | 1.001 | 9.97E-01 | 9.97E+01 |  |  |
| 8180194 | ---                           | ---      | ---                                                  |  | -0.126 | 0.917 | 1.53E-01 | 1.53E+01 |  |  |
| 8180196 | ---                           | ---      | ---                                                  |  | 0.247  | 1.187 | 1.69E-01 | 1.69E+01 |  |  |
| 8180197 | ---                           | ---      | ---                                                  |  | -0.084 | 0.943 | 3.41E-01 | 3.41E+01 |  |  |
| 8180199 | ---                           | ---      | ---                                                  |  | -0.125 | 0.917 | 1.76E-01 | 1.76E+01 |  |  |
| 8180200 | ---                           | ---      | ---                                                  |  | 0.091  | 1.065 | 5.89E-01 | 5.89E+01 |  |  |
| 8180202 | ---                           | ---      | ---                                                  |  | 0.097  | 1.070 | 5.29E-01 | 5.29E+01 |  |  |
| 8180203 | ---                           | ---      | ---                                                  |  | -0.011 | 0.992 | 9.37E-01 | 9.37E+01 |  |  |
| 8180206 | ---                           | ---      | ---                                                  |  | 0.048  | 1.034 | 8.05E-01 | 8.05E+01 |  |  |
| 8180207 | ---                           | ---      | ---                                                  |  | 0.001  | 1.000 | 9.99E-01 | 9.99E+01 |  |  |
| 8180209 | ---                           | ---      | ---                                                  |  | -0.030 | 0.979 | 9.02E-01 | 9.02E+01 |  |  |
| 8180210 | ---                           | ---      | ---                                                  |  | -0.061 | 0.959 | 6.51E-01 | 6.51E+01 |  |  |
| 8180212 | ---                           | ---      | ---                                                  |  | -0.039 | 0.973 | 8.01E-01 | 8.01E+01 |  |  |
| 8180213 | ---                           | ---      | ---                                                  |  | 0.093  | 1.066 | 5.70E-01 | 5.70E+01 |  |  |
| 8180216 | ---                           | ---      | ---                                                  |  | 0.000  | 1.000 | 1.00E+00 | 1.00E+02 |  |  |
| 8180217 | ---                           | ---      | ---                                                  |  | -0.021 | 0.986 | 9.35E-01 | 9.35E+01 |  |  |
| 8180218 | ---                           | ---      | ---                                                  |  | 0.028  | 1.019 | 9.16E-01 | 9.16E+01 |  |  |
| 8180219 | ---                           | ---      | ---                                                  |  | 0.018  | 1.012 | 9.10E-01 | 9.10E+01 |  |  |
| 8180224 | ---                           | ---      | ---                                                  |  | 0.010  | 1.007 | 9.62E-01 | 9.62E+01 |  |  |
| 8180225 | ---                           | ---      | ---                                                  |  | 0.002  | 1.001 | 9.88E-01 | 9.88E+01 |  |  |
| 8180228 | ---                           | ---      | ---                                                  |  | 0.032  | 1.023 | 8.38E-01 | 8.38E+01 |  |  |
| 8180229 | ---                           | ---      | ---                                                  |  | -0.005 | 0.996 | 9.88E-01 | 9.88E+01 |  |  |
| 8180230 | ---                           | ---      | ---                                                  |  | 0.070  | 1.049 | 3.77E-01 | 3.77E+01 |  |  |
| 8180231 | ---                           | ---      | ---                                                  |  | 0.008  | 1.006 | 9.67E-01 | 9.67E+01 |  |  |
| 8180232 | ---                           | ---      | ---                                                  |  | 0.076  | 1.054 | 7.03E-01 | 7.03E+01 |  |  |
| 8180234 | ---                           | ---      | ---                                                  |  | -0.224 | 0.856 | 1.34E-01 | 1.34E+01 |  |  |
| 8180235 | ---                           | ---      | ---                                                  |  | 0.004  | 1.003 | 9.86E-01 | 9.86E+01 |  |  |
| 8180236 | ---                           | ---      | ---                                                  |  | 0.051  | 1.036 | 8.71E-01 | 8.71E+01 |  |  |
| 8180237 | ---                           | ---      | ---                                                  |  | -0.028 | 0.981 | 9.01E-01 | 9.01E+01 |  |  |
| 8180239 | ---                           | ---      | ---                                                  |  | 0.253  | 1.191 | 4.96E-01 | 4.96E+01 |  |  |
| 8180240 | ---                           | ---      | ---                                                  |  | -0.033 | 0.977 | 8.88E-01 | 8.88E+01 |  |  |
| 8180241 | ---                           | ---      | ---                                                  |  | -0.007 | 0.995 | 9.64E-01 | 9.64E+01 |  |  |
| 8180244 | ---                           | ---      | ---                                                  |  | -0.023 | 0.984 | 9.12E-01 | 9.12E+01 |  |  |
| 8180246 | ---                           | ---      | ---                                                  |  | 0.033  | 1.023 | 9.41E-01 | 9.41E+01 |  |  |
| 8180247 | ---                           | ---      | ---                                                  |  | 0.061  | 1.043 | 5.98E-01 | 5.98E+01 |  |  |
| 8180249 | ---                           | ---      | ---                                                  |  | -0.027 | 0.982 | 8.64E-01 | 8.64E+01 |  |  |
| 8180250 | ---                           | ---      | ---                                                  |  | 0.020  | 1.014 | 9.27E-01 | 9.27E+01 |  |  |
| 8180251 | ---                           | ---      | ---                                                  |  | 0.061  | 1.043 | 7.45E-01 | 7.45E+01 |  |  |

|         |     |     |     |        |       |          |          |  |  |
|---------|-----|-----|-----|--------|-------|----------|----------|--|--|
| 8180252 | --- | --- | --- | 0.055  | 1.039 | 6.37E-01 | 6.37E+01 |  |  |
| 8180254 | --- | --- | --- | -0.032 | 0.978 | 7.25E-01 | 7.25E+01 |  |  |
| 8180255 | --- | --- | --- | -0.173 | 0.887 | 3.09E-01 | 3.09E+01 |  |  |
| 8180256 | --- | --- | --- | -0.136 | 0.910 | 2.78E-01 | 2.78E+01 |  |  |
| 8180257 | --- | --- | --- | -0.107 | 0.929 | 6.80E-01 | 6.80E+01 |  |  |
| 8180258 | --- | --- | --- | 0.097  | 1.070 | 5.29E-01 | 5.29E+01 |  |  |
| 8180259 | --- | --- | --- | -0.179 | 0.883 | 2.64E-01 | 2.64E+01 |  |  |
| 8180260 | --- | --- | --- | -0.023 | 0.984 | 9.04E-01 | 9.04E+01 |  |  |
| 8180261 | --- | --- | --- | 0.284  | 1.218 | 6.51E-02 | 6.51E+00 |  |  |
| 8180262 | --- | --- | --- | 0.007  | 1.005 | 9.74E-01 | 9.74E+01 |  |  |
| 8180263 | --- | --- | --- | -0.021 | 0.986 | 9.03E-01 | 9.03E+01 |  |  |
| 8180265 | --- | --- | --- | 0.051  | 1.036 | 8.71E-01 | 8.71E+01 |  |  |
| 8180266 | --- | --- | --- | -0.063 | 0.957 | 4.73E-01 | 4.73E+01 |  |  |
| 8180267 | --- | --- | --- | 0.017  | 1.012 | 9.22E-01 | 9.22E+01 |  |  |
| 8180268 | --- | --- | --- | 0.046  | 1.032 | 8.66E-01 | 8.66E+01 |  |  |
| 8180269 | --- | --- | --- | 0.016  | 1.011 | 9.36E-01 | 9.36E+01 |  |  |
| 8180270 | --- | --- | --- | -0.105 | 0.930 | 3.60E-01 | 3.60E+01 |  |  |
| 8180273 | --- | --- | --- | 0.044  | 1.031 | 8.01E-01 | 8.01E+01 |  |  |
| 8180274 | --- | --- | --- | 0.115  | 1.083 | 4.13E-01 | 4.13E+01 |  |  |
| 8180275 | --- | --- | --- | 0.043  | 1.030 | 8.66E-01 | 8.66E+01 |  |  |
| 8180277 | --- | --- | --- | -0.042 | 0.971 | 8.36E-01 | 8.36E+01 |  |  |
| 8180278 | --- | --- | --- | 0.010  | 1.007 | 9.64E-01 | 9.64E+01 |  |  |
| 8180279 | --- | --- | --- | -0.059 | 0.960 | 7.61E-01 | 7.61E+01 |  |  |
| 8180280 | --- | --- | --- | -0.060 | 0.959 | 7.07E-01 | 7.07E+01 |  |  |
| 8180281 | --- | --- | --- | -0.026 | 0.982 | 8.99E-01 | 8.99E+01 |  |  |
| 8180282 | --- | --- | --- | -0.086 | 0.942 | 6.75E-01 | 6.75E+01 |  |  |
| 8180283 | --- | --- | --- | -0.030 | 0.980 | 8.88E-01 | 8.88E+01 |  |  |
| 8180284 | --- | --- | --- | -0.020 | 0.986 | 9.37E-01 | 9.37E+01 |  |  |
| 8180285 | --- | --- | --- | 0.042  | 1.029 | 7.41E-01 | 7.41E+01 |  |  |
| 8180286 | --- | --- | --- | -0.025 | 0.983 | 8.27E-01 | 8.27E+01 |  |  |
| 8180287 | --- | --- | --- | -0.003 | 0.998 | 9.85E-01 | 9.85E+01 |  |  |
| 8180288 | --- | --- | --- | -0.126 | 0.917 | 1.53E-01 | 1.53E+01 |  |  |
| 8180289 | --- | --- | --- | -0.127 | 0.916 | 1.56E-01 | 1.56E+01 |  |  |
| 8180290 | --- | --- | --- | -0.126 | 0.916 | 1.55E-01 | 1.55E+01 |  |  |
| 8180291 | --- | --- | --- | -0.126 | 0.916 | 1.55E-01 | 1.55E+01 |  |  |
| 8180292 | --- | --- | --- | -0.126 | 0.916 | 1.31E-01 | 1.31E+01 |  |  |
| 8180293 | --- | --- | --- | -0.126 | 0.917 | 1.53E-01 | 1.53E+01 |  |  |
| 8180294 | --- | --- | --- | -0.265 | 0.832 | 1.50E-03 | 1.50E-01 |  |  |
| 8180295 | --- | --- | --- | -0.128 | 0.915 | 1.55E-01 | 1.55E+01 |  |  |
| 8180296 | --- | --- | --- | -0.125 | 0.917 | 1.44E-01 | 1.44E+01 |  |  |
| 8180297 | --- | --- | --- | -0.010 | 0.993 | 9.60E-01 | 9.60E+01 |  |  |
| 8180298 | --- | --- | --- | 0.071  | 1.050 | 6.35E-01 | 6.35E+01 |  |  |
| 8180299 | --- | --- | --- | -0.007 | 0.996 | 9.80E-01 | 9.80E+01 |  |  |
| 8180300 | --- | --- | --- | -0.033 | 0.977 | 8.38E-01 | 8.38E+01 |  |  |
| 8180301 | --- | --- | --- | 0.008  | 1.006 | 9.76E-01 | 9.76E+01 |  |  |
| 8180302 | --- | --- | --- | 0.010  | 1.007 | 9.68E-01 | 9.68E+01 |  |  |
| 8180304 | --- | --- | --- | 0.050  | 1.035 | 7.49E-01 | 7.49E+01 |  |  |
| 8180305 | --- | --- | --- | 0.051  | 1.036 | 8.41E-01 | 8.41E+01 |  |  |
| 8180306 | --- | --- | --- | 0.033  | 1.023 | 8.74E-01 | 8.74E+01 |  |  |
| 8180307 | --- | --- | --- | 0.019  | 1.013 | 9.07E-01 | 9.07E+01 |  |  |
| 8180308 | --- | --- | --- | 0.020  | 1.014 | 9.08E-01 | 9.08E+01 |  |  |
| 8180310 | --- | --- | --- | -0.082 | 0.945 | 3.08E-01 | 3.08E+01 |  |  |
| 8180311 | --- | --- | --- | 0.045  | 1.032 | 7.57E-01 | 7.57E+01 |  |  |
| 8180312 | --- | --- | --- | -0.057 | 0.961 | 5.75E-01 | 5.75E+01 |  |  |
| 8180313 | --- | --- | --- | -0.046 | 0.968 | 8.35E-01 | 8.35E+01 |  |  |
| 8180314 | --- | --- | --- | -0.058 | 0.961 | 7.51E-01 | 7.51E+01 |  |  |
| 8180315 | --- | --- | --- | 0.046  | 1.032 | 8.29E-01 | 8.29E+01 |  |  |
| 8180316 | --- | --- | --- | -0.250 | 0.841 | 7.67E-02 | 7.67E+00 |  |  |
| 8180317 | --- | --- | --- | -0.234 | 0.851 | 1.02E-01 | 1.02E+01 |  |  |
| 8180318 | --- | --- | --- | -0.255 | 0.838 | 7.90E-02 | 7.90E+00 |  |  |
| 8180319 | --- | --- | --- | -0.258 | 0.836 | 5.36E-02 | 5.36E+00 |  |  |
| 8180321 | --- | --- | --- | -0.173 | 0.887 | 3.09E-01 | 3.09E+01 |  |  |
| 8180322 | --- | --- | --- | -0.134 | 0.911 | 5.04E-01 | 5.04E+01 |  |  |
| 8180323 | --- | --- | --- | -0.108 | 0.928 | 3.44E-01 | 3.44E+01 |  |  |
| 8180325 | --- | --- | --- | 0.012  | 1.009 | 9.56E-01 | 9.56E+01 |  |  |
| 8180326 | --- | --- | --- | 0.008  | 1.005 | 9.76E-01 | 9.76E+01 |  |  |
| 8180327 | --- | --- | --- | 0.018  | 1.012 | 9.30E-01 | 9.30E+01 |  |  |
| 8180328 | --- | --- | --- | 0.022  | 1.015 | 9.13E-01 | 9.13E+01 |  |  |
| 8180329 | --- | --- | --- | 0.022  | 1.015 | 8.05E-01 | 8.05E+01 |  |  |
| 8180330 | --- | --- | --- | 0.018  | 1.013 | 8.41E-01 | 8.41E+01 |  |  |
| 8180331 | --- | --- | --- | 0.021  | 1.015 | 8.11E-01 | 8.11E+01 |  |  |
| 8180332 | --- | --- | --- | 0.020  | 1.014 | 8.23E-01 | 8.23E+01 |  |  |
| 8180333 | --- | --- | --- | 0.016  | 1.011 | 8.58E-01 | 8.58E+01 |  |  |
| 8180334 | --- | --- | --- | 0.019  | 1.013 | 8.27E-01 | 8.27E+01 |  |  |
| 8180335 | --- | --- | --- | 0.018  | 1.013 | 8.41E-01 | 8.41E+01 |  |  |
| 8180336 | --- | --- | --- | 0.055  | 1.039 | 7.77E-01 | 7.77E+01 |  |  |
| 8180337 | --- | --- | --- | -0.046 | 0.968 | 7.85E-01 | 7.85E+01 |  |  |

|         |     |     |     |        |       |          |          |  |  |
|---------|-----|-----|-----|--------|-------|----------|----------|--|--|
| 8180338 | --- | --- | --- | 0.066  | 1.047 | 7.95E-01 | 7.95E+01 |  |  |
| 8180339 | --- | --- | --- | -0.200 | 0.870 | 1.25E-01 | 1.25E+01 |  |  |
| 8180340 | --- | --- | --- | 0.102  | 1.074 | 4.32E-02 | 4.32E+00 |  |  |
| 8180341 | --- | --- | --- | -0.004 | 0.997 | 9.90E-01 | 9.90E+01 |  |  |
| 8180342 | --- | --- | --- | -0.007 | 0.996 | 9.84E-01 | 9.84E+01 |  |  |
| 8180343 | --- | --- | --- | -0.007 | 0.995 | 9.83E-01 | 9.83E+01 |  |  |
| 8180344 | --- | --- | --- | 0.176  | 1.130 | 5.10E-01 | 5.10E+01 |  |  |
| 8180345 | --- | --- | --- | -0.009 | 0.994 | 9.35E-01 | 9.35E+01 |  |  |
| 8180346 | --- | --- | --- | 0.354  | 1.278 | 1.43E-01 | 1.43E+01 |  |  |
| 8180347 | --- | --- | --- | -0.034 | 0.977 | 7.01E-01 | 7.01E+01 |  |  |
| 8180348 | --- | --- | --- | -0.065 | 0.956 | 8.96E-01 | 8.96E+01 |  |  |
| 8180349 | --- | --- | --- | -0.008 | 0.994 | 9.77E-01 | 9.77E+01 |  |  |
| 8180350 | --- | --- | --- | -0.008 | 0.994 | 9.75E-01 | 9.75E+01 |  |  |
| 8180351 | --- | --- | --- | 0.009  | 1.006 | 9.71E-01 | 9.71E+01 |  |  |
| 8180353 | --- | --- | --- | -0.083 | 0.944 | 6.62E-01 | 6.62E+01 |  |  |
| 8180354 | --- | --- | --- | -0.094 | 0.937 | 6.34E-01 | 6.34E+01 |  |  |
| 8180355 | --- | --- | --- | -0.055 | 0.963 | 7.72E-01 | 7.72E+01 |  |  |
| 8180356 | --- | --- | --- | -0.052 | 0.964 | 6.21E-01 | 6.21E+01 |  |  |
| 8180357 | --- | --- | --- | -0.043 | 0.971 | 8.02E-01 | 8.02E+01 |  |  |
| 8180358 | --- | --- | --- | -0.037 | 0.975 | 8.10E-01 | 8.10E+01 |  |  |
| 8180359 | --- | --- | --- | -0.118 | 0.922 | 6.37E-01 | 6.37E+01 |  |  |
| 8180361 | --- | --- | --- | -0.036 | 0.975 | 7.82E-01 | 7.82E+01 |  |  |
| 8180362 | --- | --- | --- | -0.085 | 0.943 | 4.39E-01 | 4.39E+01 |  |  |
| 8180363 | --- | --- | --- | -0.092 | 0.938 | 3.87E-01 | 3.87E+01 |  |  |
| 8180364 | --- | --- | --- | -0.245 | 0.844 | 4.26E-03 | 4.26E-01 |  |  |
| 8180365 | --- | --- | --- | -0.245 | 0.844 | 4.26E-03 | 4.26E-01 |  |  |
| 8180366 | --- | --- | --- | -0.116 | 0.923 | 8.08E-01 | 8.08E+01 |  |  |
| 8180367 | --- | --- | --- | -0.116 | 0.923 | 8.08E-01 | 8.08E+01 |  |  |
| 8180370 | --- | --- | --- | 0.004  | 1.003 | 9.84E-01 | 9.84E+01 |  |  |
| 8180371 | --- | --- | --- | -0.038 | 0.974 | 8.58E-01 | 8.58E+01 |  |  |
| 8180372 | --- | --- | --- | -0.118 | 0.921 | 4.10E-01 | 4.10E+01 |  |  |
| 8180373 | --- | --- | --- | -0.100 | 0.933 | 6.91E-01 | 6.91E+01 |  |  |
| 8180374 | --- | --- | --- | -0.029 | 0.980 | 9.24E-01 | 9.24E+01 |  |  |
| 8180375 | --- | --- | --- | 0.028  | 1.019 | 8.97E-01 | 8.97E+01 |  |  |
| 8180377 | --- | --- | --- | -0.266 | 0.831 | 3.63E-02 | 3.63E+00 |  |  |
| 8180378 | --- | --- | --- | -0.186 | 0.879 | 1.00E-02 | 1.00E+00 |  |  |
| 8180379 | --- | --- | --- | -0.259 | 0.836 | 2.84E-02 | 2.84E+00 |  |  |
| 8180382 | --- | --- | --- | -0.058 | 0.961 | 3.82E-01 | 3.82E+01 |  |  |
| 8180383 | --- | --- | --- | -0.008 | 0.995 | 9.69E-01 | 9.69E+01 |  |  |
| 8180384 | --- | --- | --- | -0.012 | 0.992 | 9.49E-01 | 9.49E+01 |  |  |
| 8180385 | --- | --- | --- | 0.114  | 1.082 | 2.70E-01 | 2.70E+01 |  |  |
| 8180386 | --- | --- | --- | 0.003  | 1.002 | 9.91E-01 | 9.91E+01 |  |  |
| 8180387 | --- | --- | --- | 0.002  | 1.001 | 9.96E-01 | 9.96E+01 |  |  |
| 8180388 | --- | --- | --- | 0.013  | 1.009 | 9.65E-01 | 9.65E+01 |  |  |
| 8180389 | --- | --- | --- | 0.002  | 1.002 | 9.94E-01 | 9.94E+01 |  |  |
| 8180390 | --- | --- | --- | -0.022 | 0.985 | 9.19E-01 | 9.19E+01 |  |  |
| 8180391 | --- | --- | --- | 0.027  | 1.019 | 7.77E-01 | 7.77E+01 |  |  |
| 8180392 | --- | --- | --- | 0.123  | 1.089 | 3.26E-01 | 3.26E+01 |  |  |
| 8180393 | --- | --- | --- | 0.066  | 1.047 | 7.27E-01 | 7.27E+01 |  |  |
| 8180394 | --- | --- | --- | 0.021  | 1.015 | 9.46E-01 | 9.46E+01 |  |  |
| 8180395 | --- | --- | --- | 0.037  | 1.026 | 8.84E-01 | 8.84E+01 |  |  |
| 8180396 | --- | --- | --- | 0.030  | 1.021 | 9.15E-01 | 9.15E+01 |  |  |
| 8180397 | --- | --- | --- | 0.054  | 1.038 | 8.59E-01 | 8.59E+01 |  |  |
| 8180398 | --- | --- | --- | 0.010  | 1.007 | 9.64E-01 | 9.64E+01 |  |  |
| 8180401 | --- | --- | --- | -0.106 | 0.929 | 1.38E-01 | 1.38E+01 |  |  |
| 8180402 | --- | --- | --- | -0.007 | 0.995 | 9.56E-01 | 9.56E+01 |  |  |
| 8180403 | --- | --- | --- | -0.188 | 0.878 | 4.75E-01 | 4.75E+01 |  |  |
| 8180404 | --- | --- | --- | -0.031 | 0.979 | 8.54E-01 | 8.54E+01 |  |  |
| 8180405 | --- | --- | --- | -0.224 | 0.856 | 1.94E-01 | 1.94E+01 |  |  |
| 8180406 | --- | --- | --- | 0.017  | 1.012 | 9.19E-01 | 9.19E+01 |  |  |
| 8180407 | --- | --- | --- | -0.014 | 0.990 | 9.09E-01 | 9.09E+01 |  |  |
| 8180408 | --- | --- | --- | -0.012 | 0.992 | 9.22E-01 | 9.22E+01 |  |  |
| 8180409 | --- | --- | --- | -0.010 | 0.993 | 9.51E-01 | 9.51E+01 |  |  |
| 8180410 | --- | --- | --- | -0.048 | 0.967 | 7.09E-01 | 7.09E+01 |  |  |
| 8180411 | --- | --- | --- | 0.039  | 1.028 | 8.54E-01 | 8.54E+01 |  |  |
| 8180412 | --- | --- | --- | -0.023 | 0.984 | 8.84E-01 | 8.84E+01 |  |  |
| 8180413 | --- | --- | --- | 0.002  | 1.002 | 9.90E-01 | 9.90E+01 |  |  |
| 8180414 | --- | --- | --- | 0.042  | 1.029 | 7.72E-01 | 7.72E+01 |  |  |
| 8180416 | --- | --- | --- | -0.049 | 0.967 | 6.91E-01 | 6.91E+01 |  |  |
| 8180417 | --- | --- | --- | -0.038 | 0.974 | 8.30E-01 | 8.30E+01 |  |  |
| 8180418 | --- | --- | --- | 0.184  | 1.136 | 4.07E-01 | 4.07E+01 |  |  |
